# Supplementary material for: Gene-environment and protein-degradation signatures characterize genomic and phenotypic diversity in wild Caenorhabditis elegans populations
Source: PubMed Central journal article supplement (PMC3846632; doi:10.1186/1741-7007-11-93), 2013-08-19

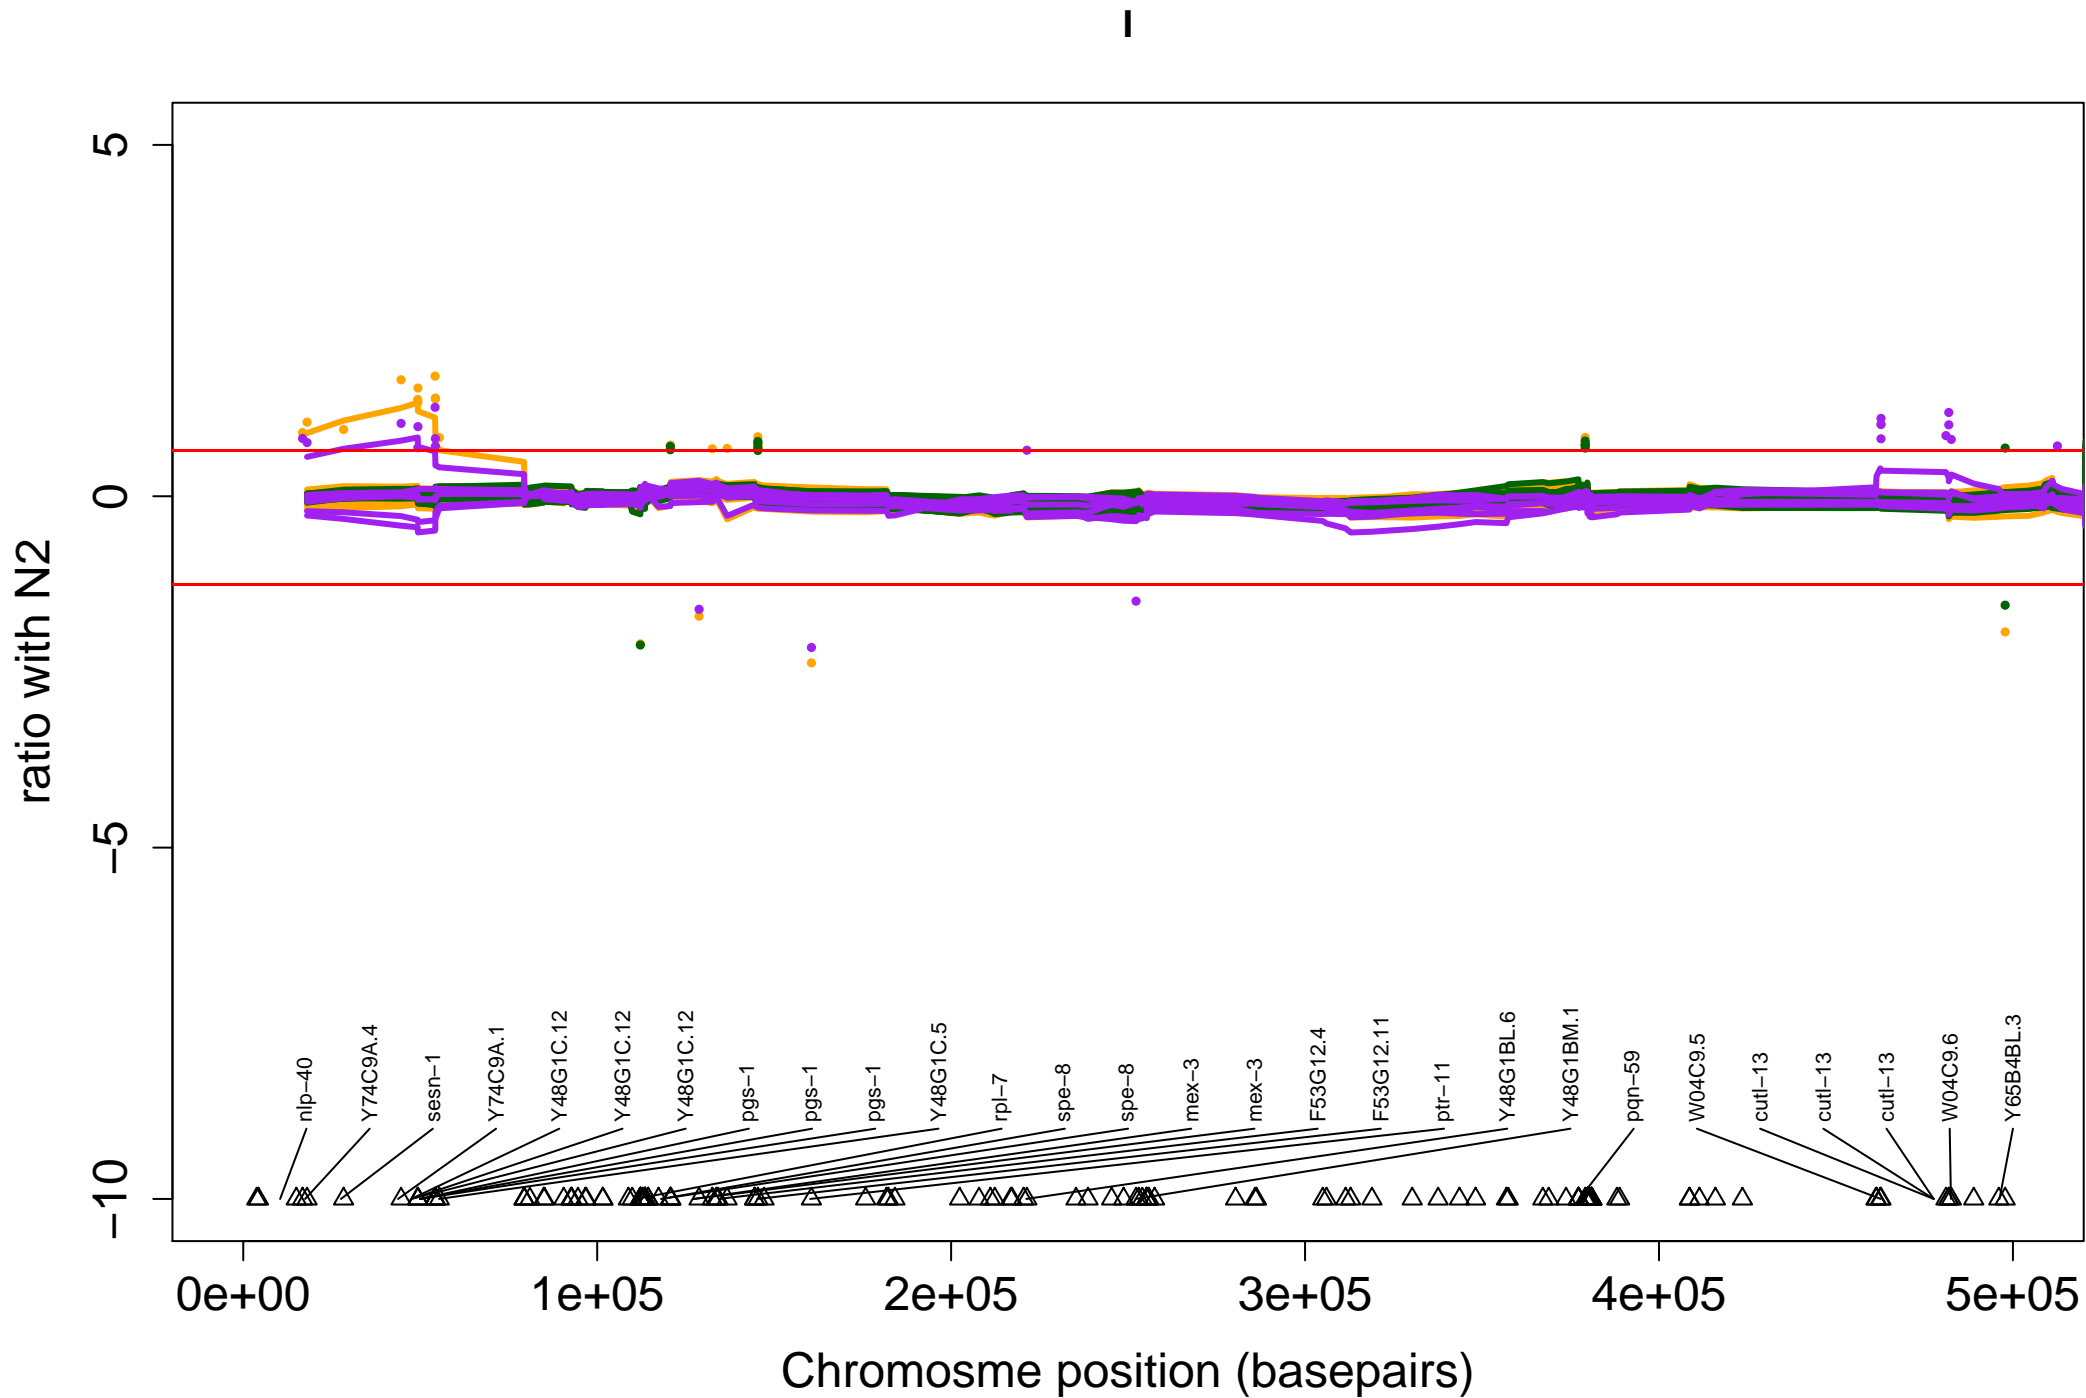

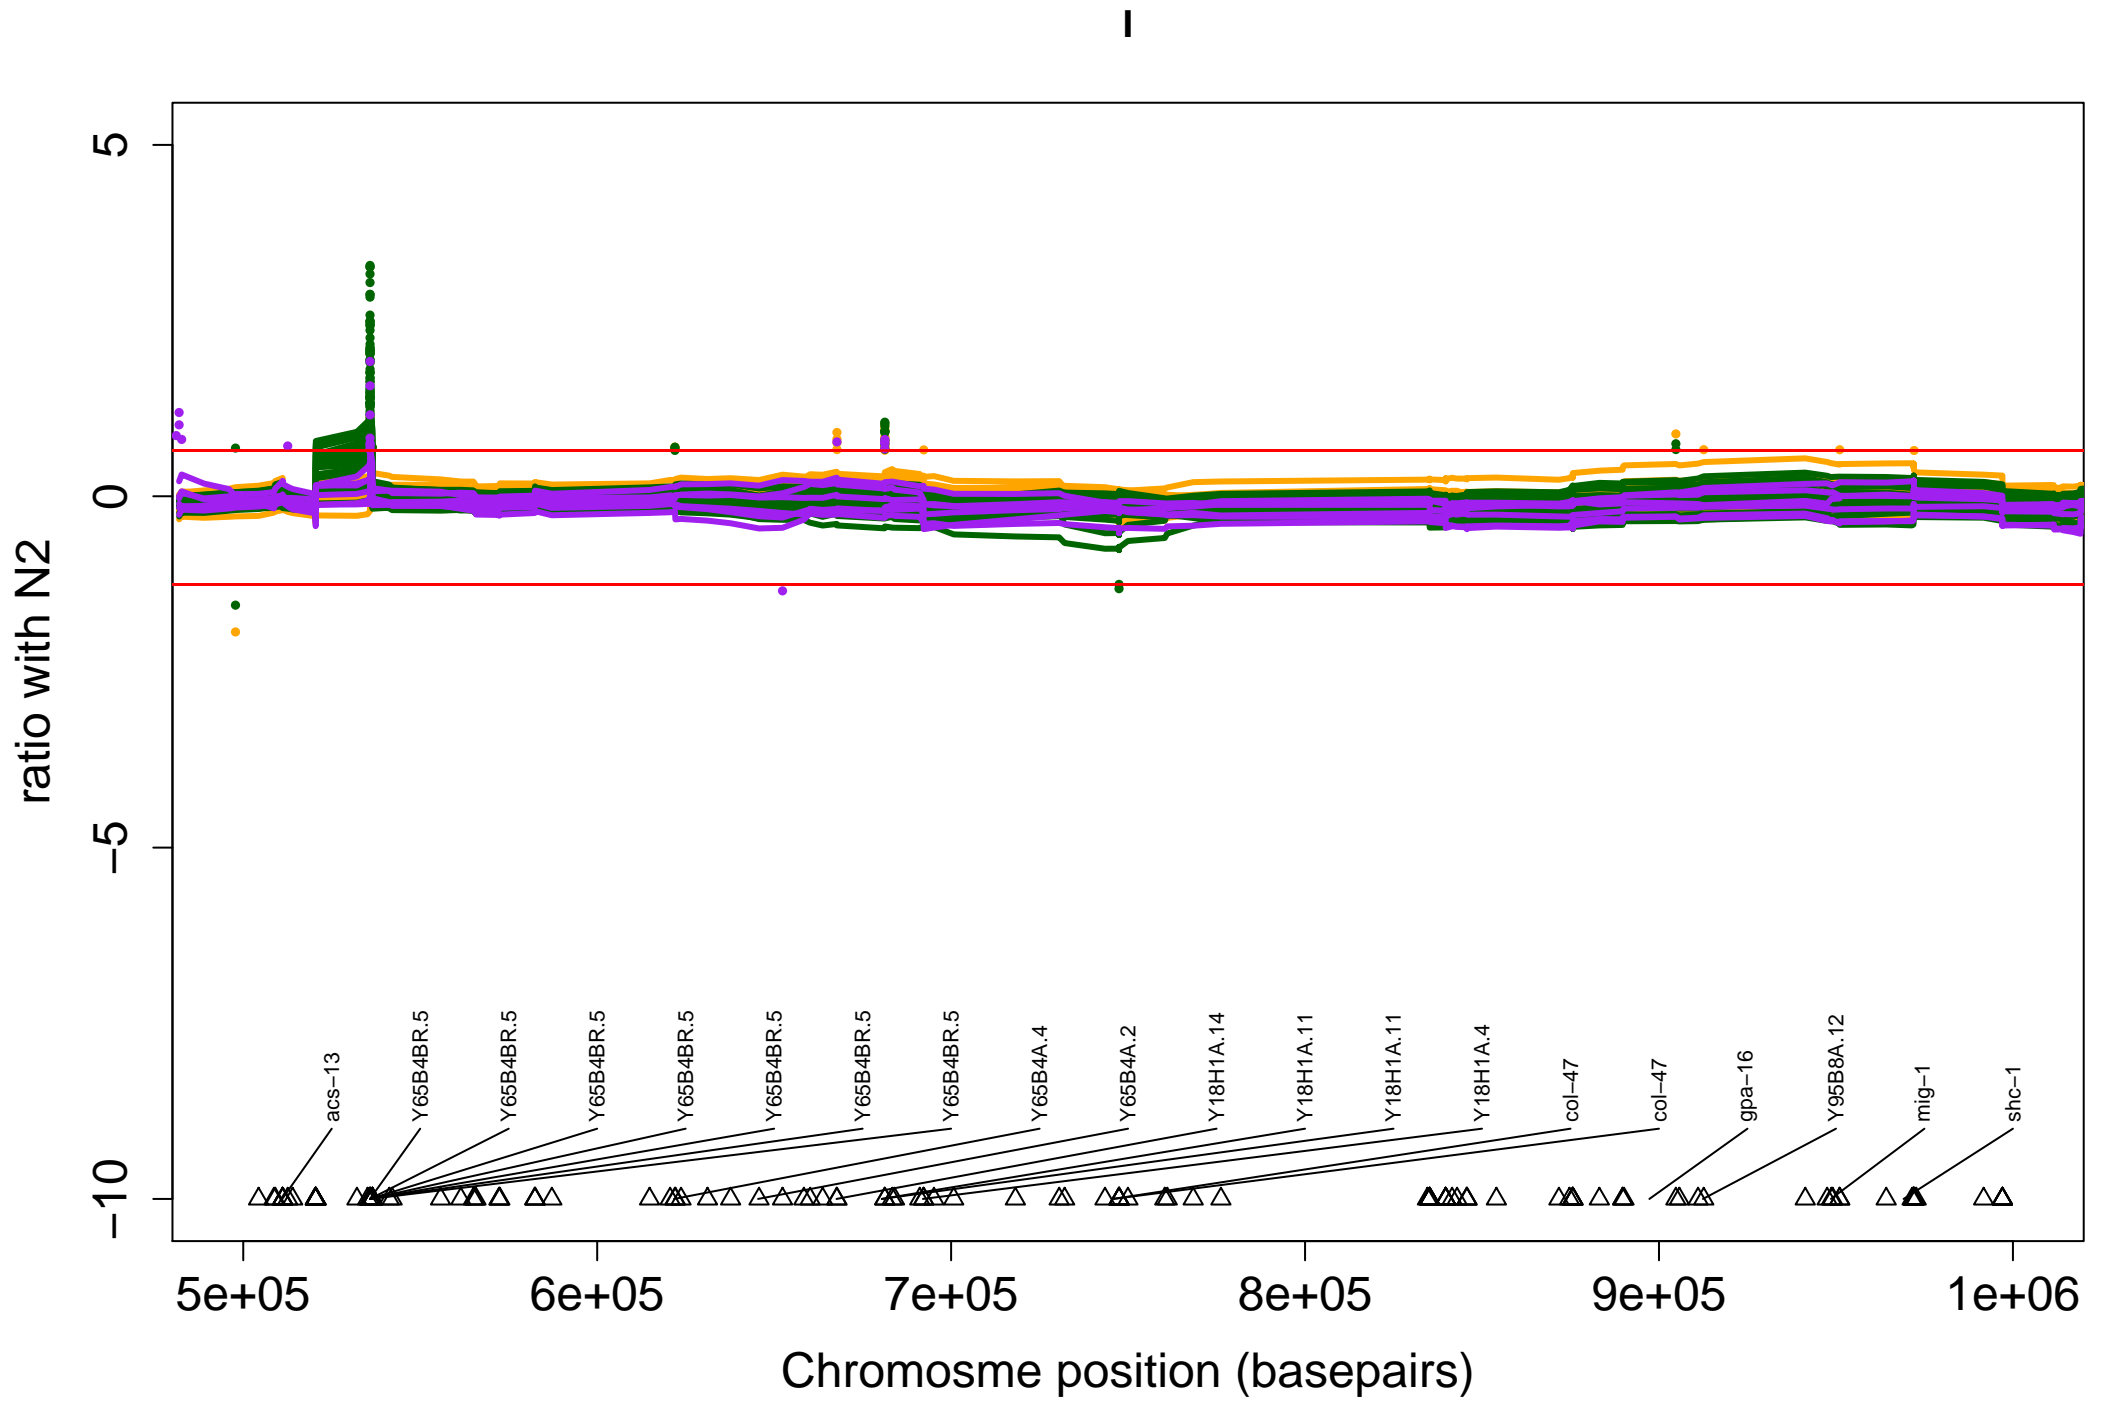

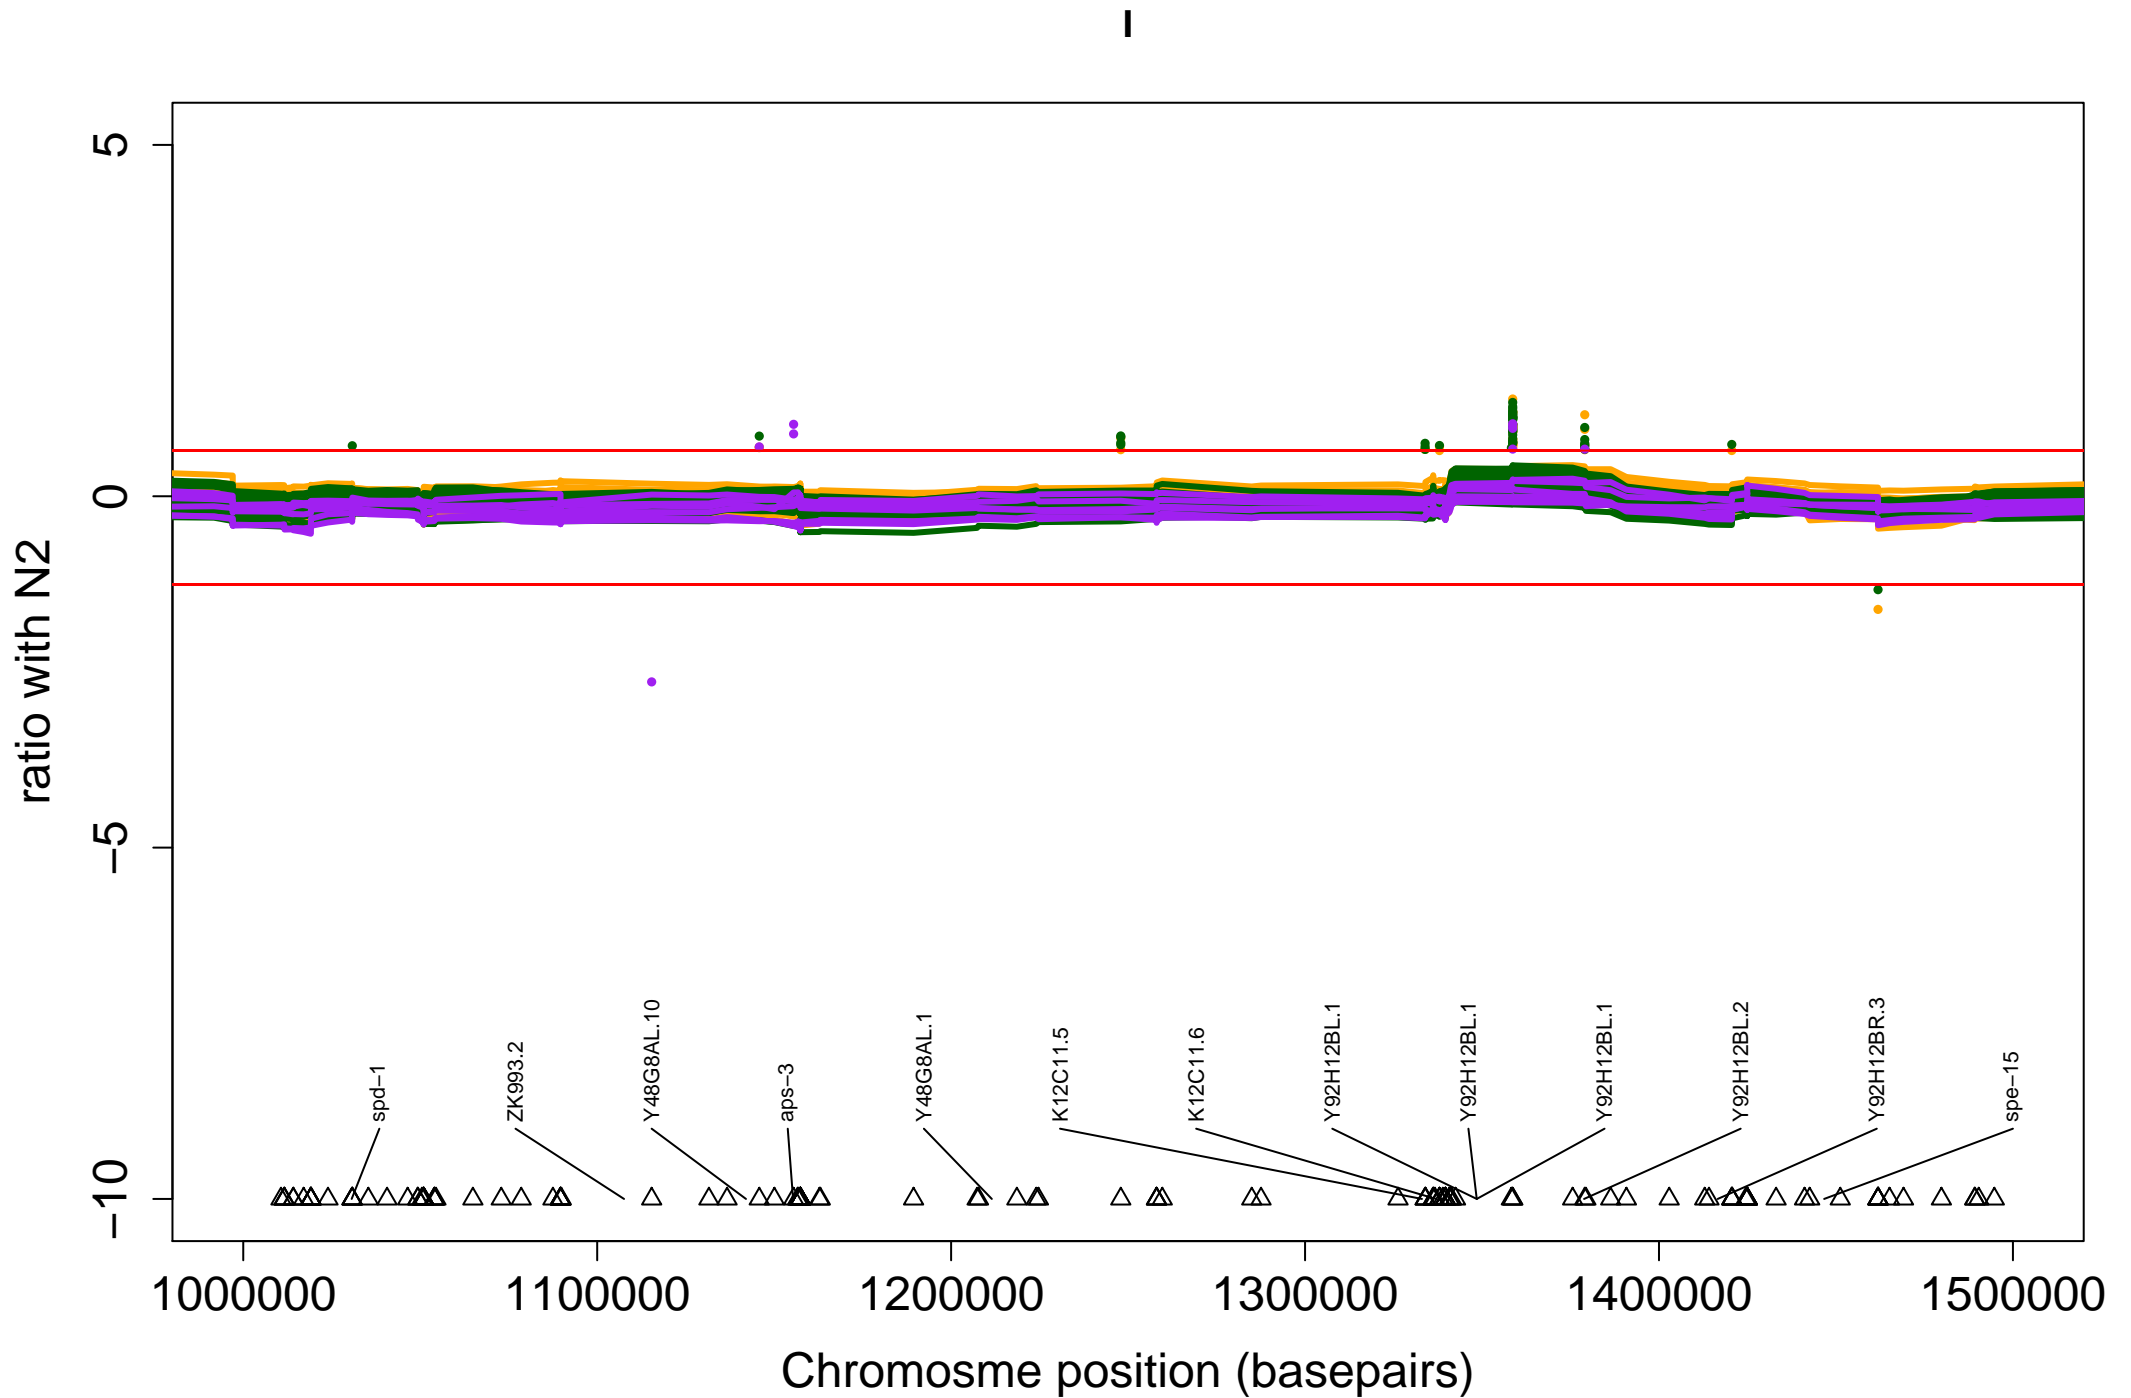

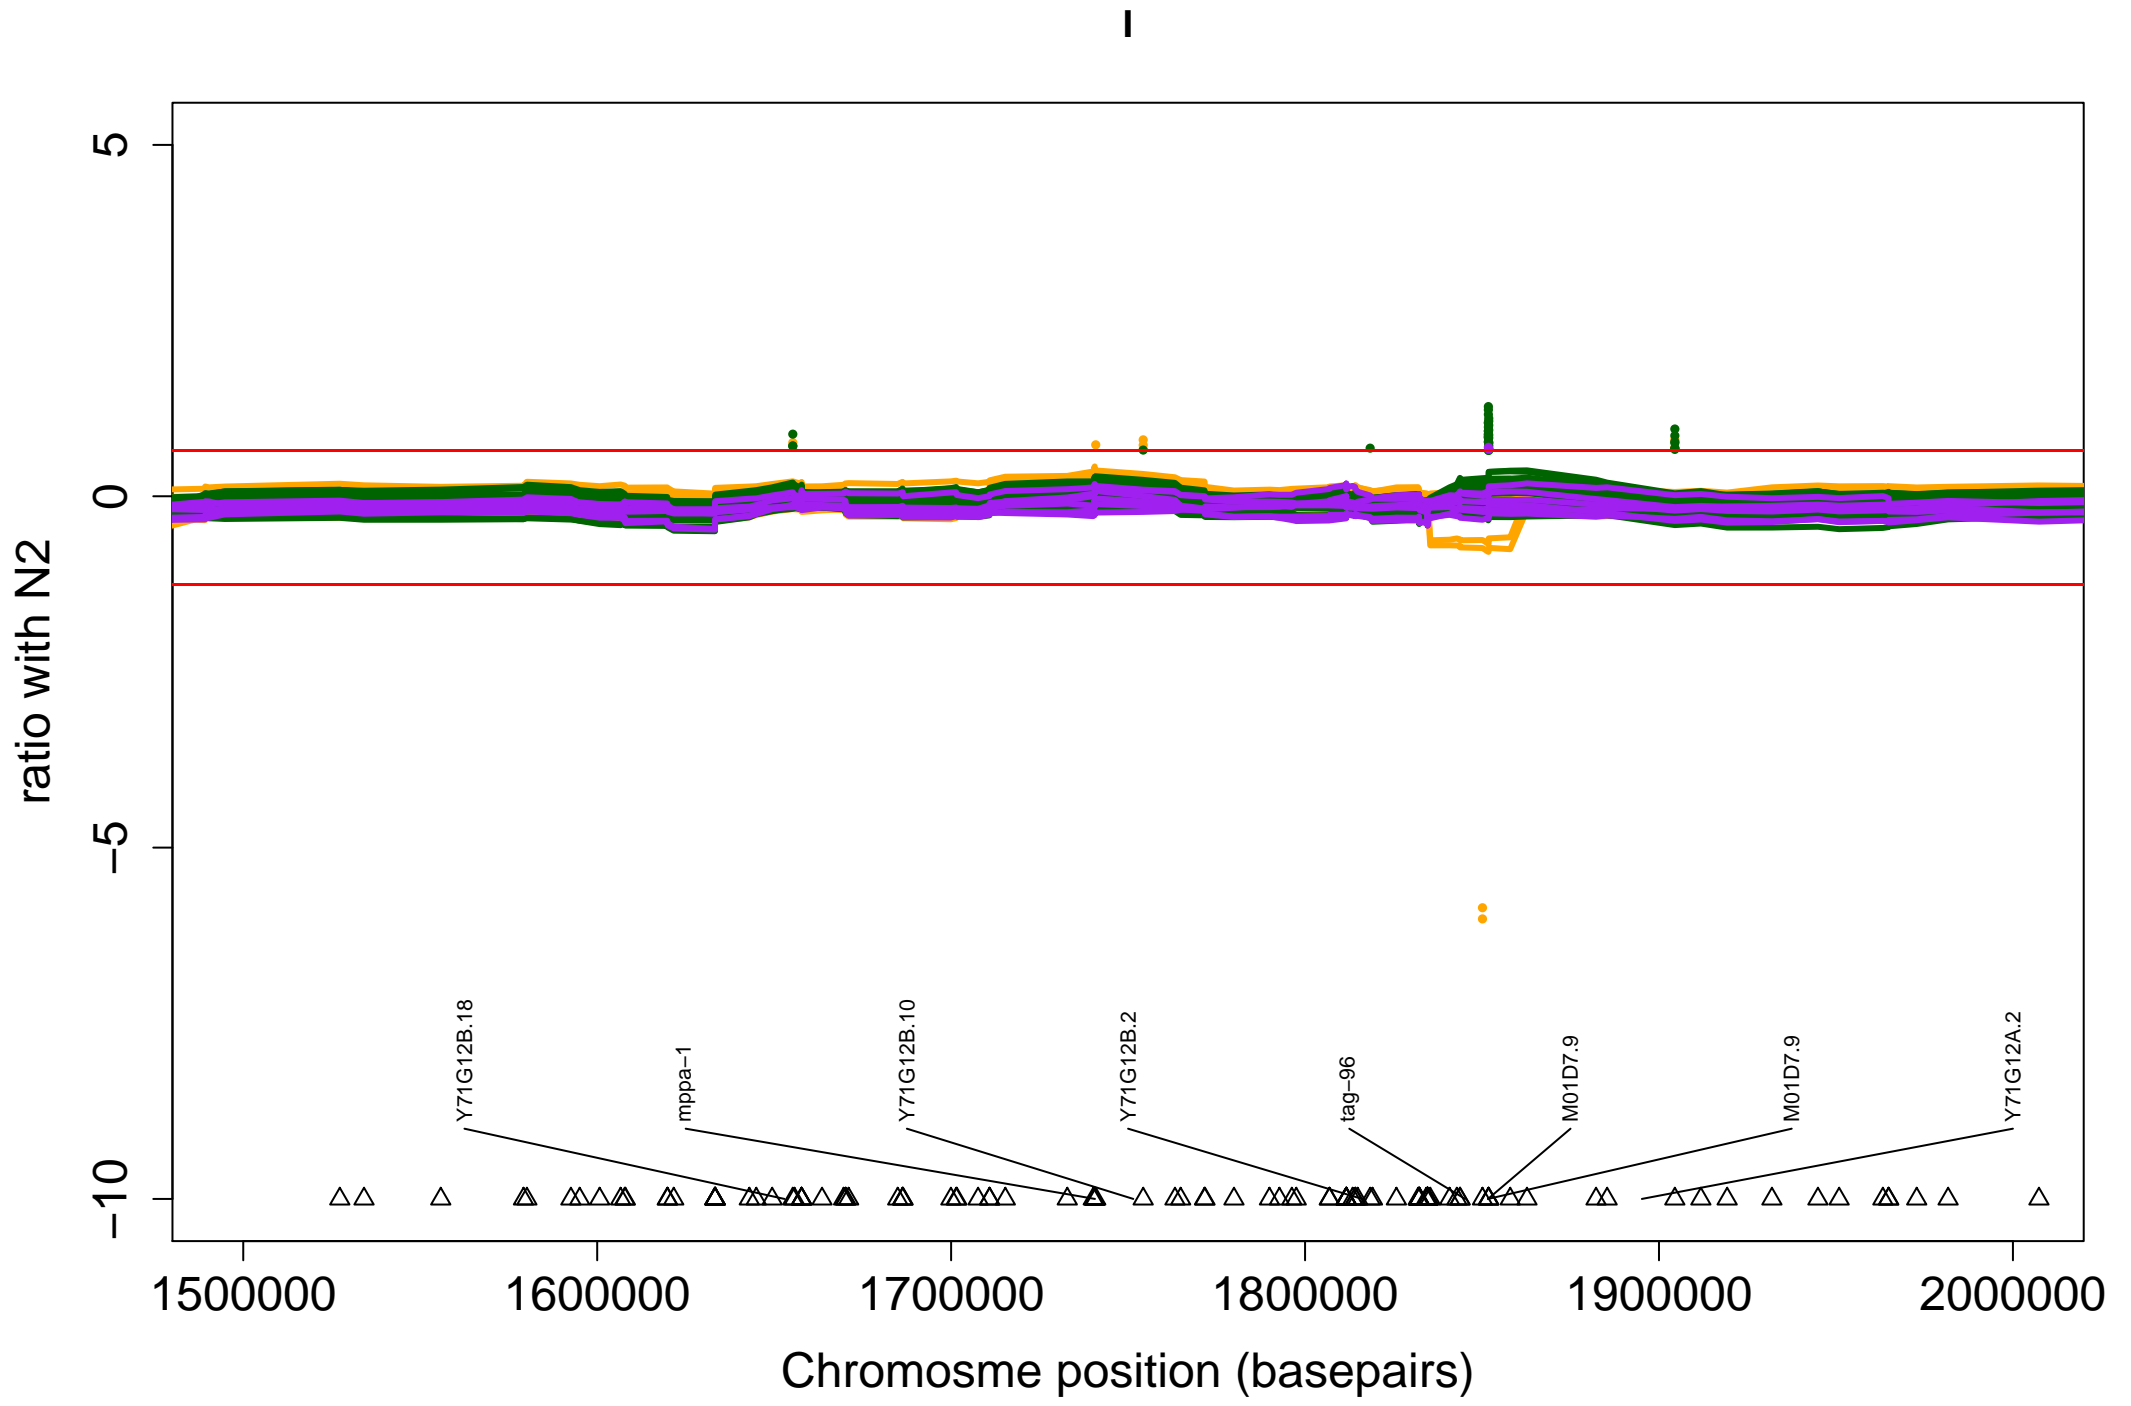

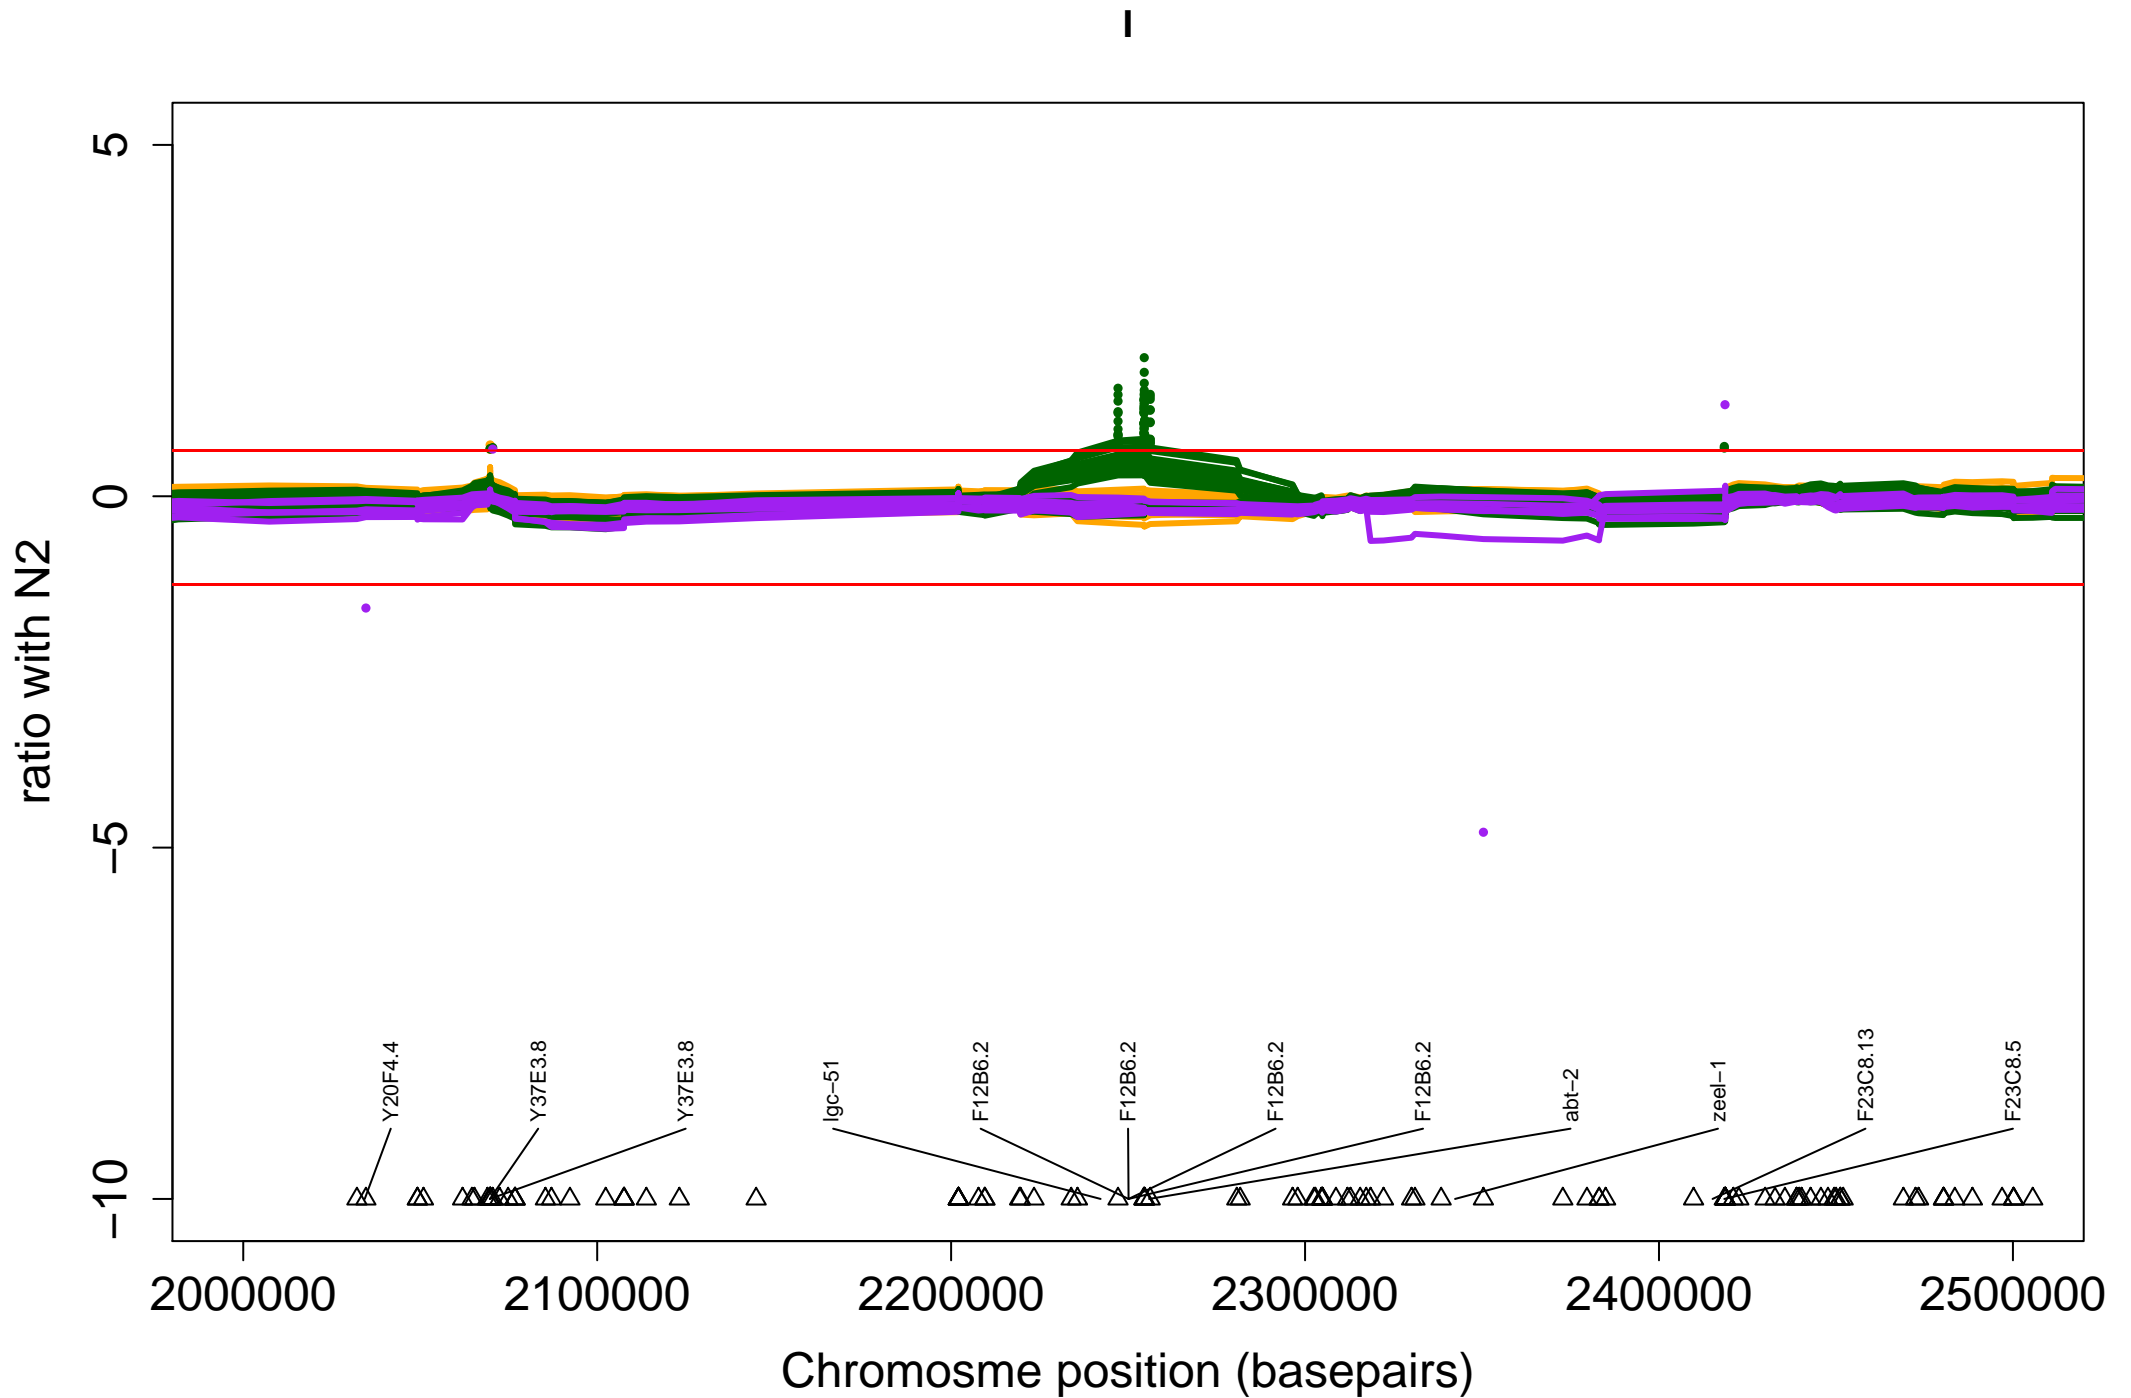

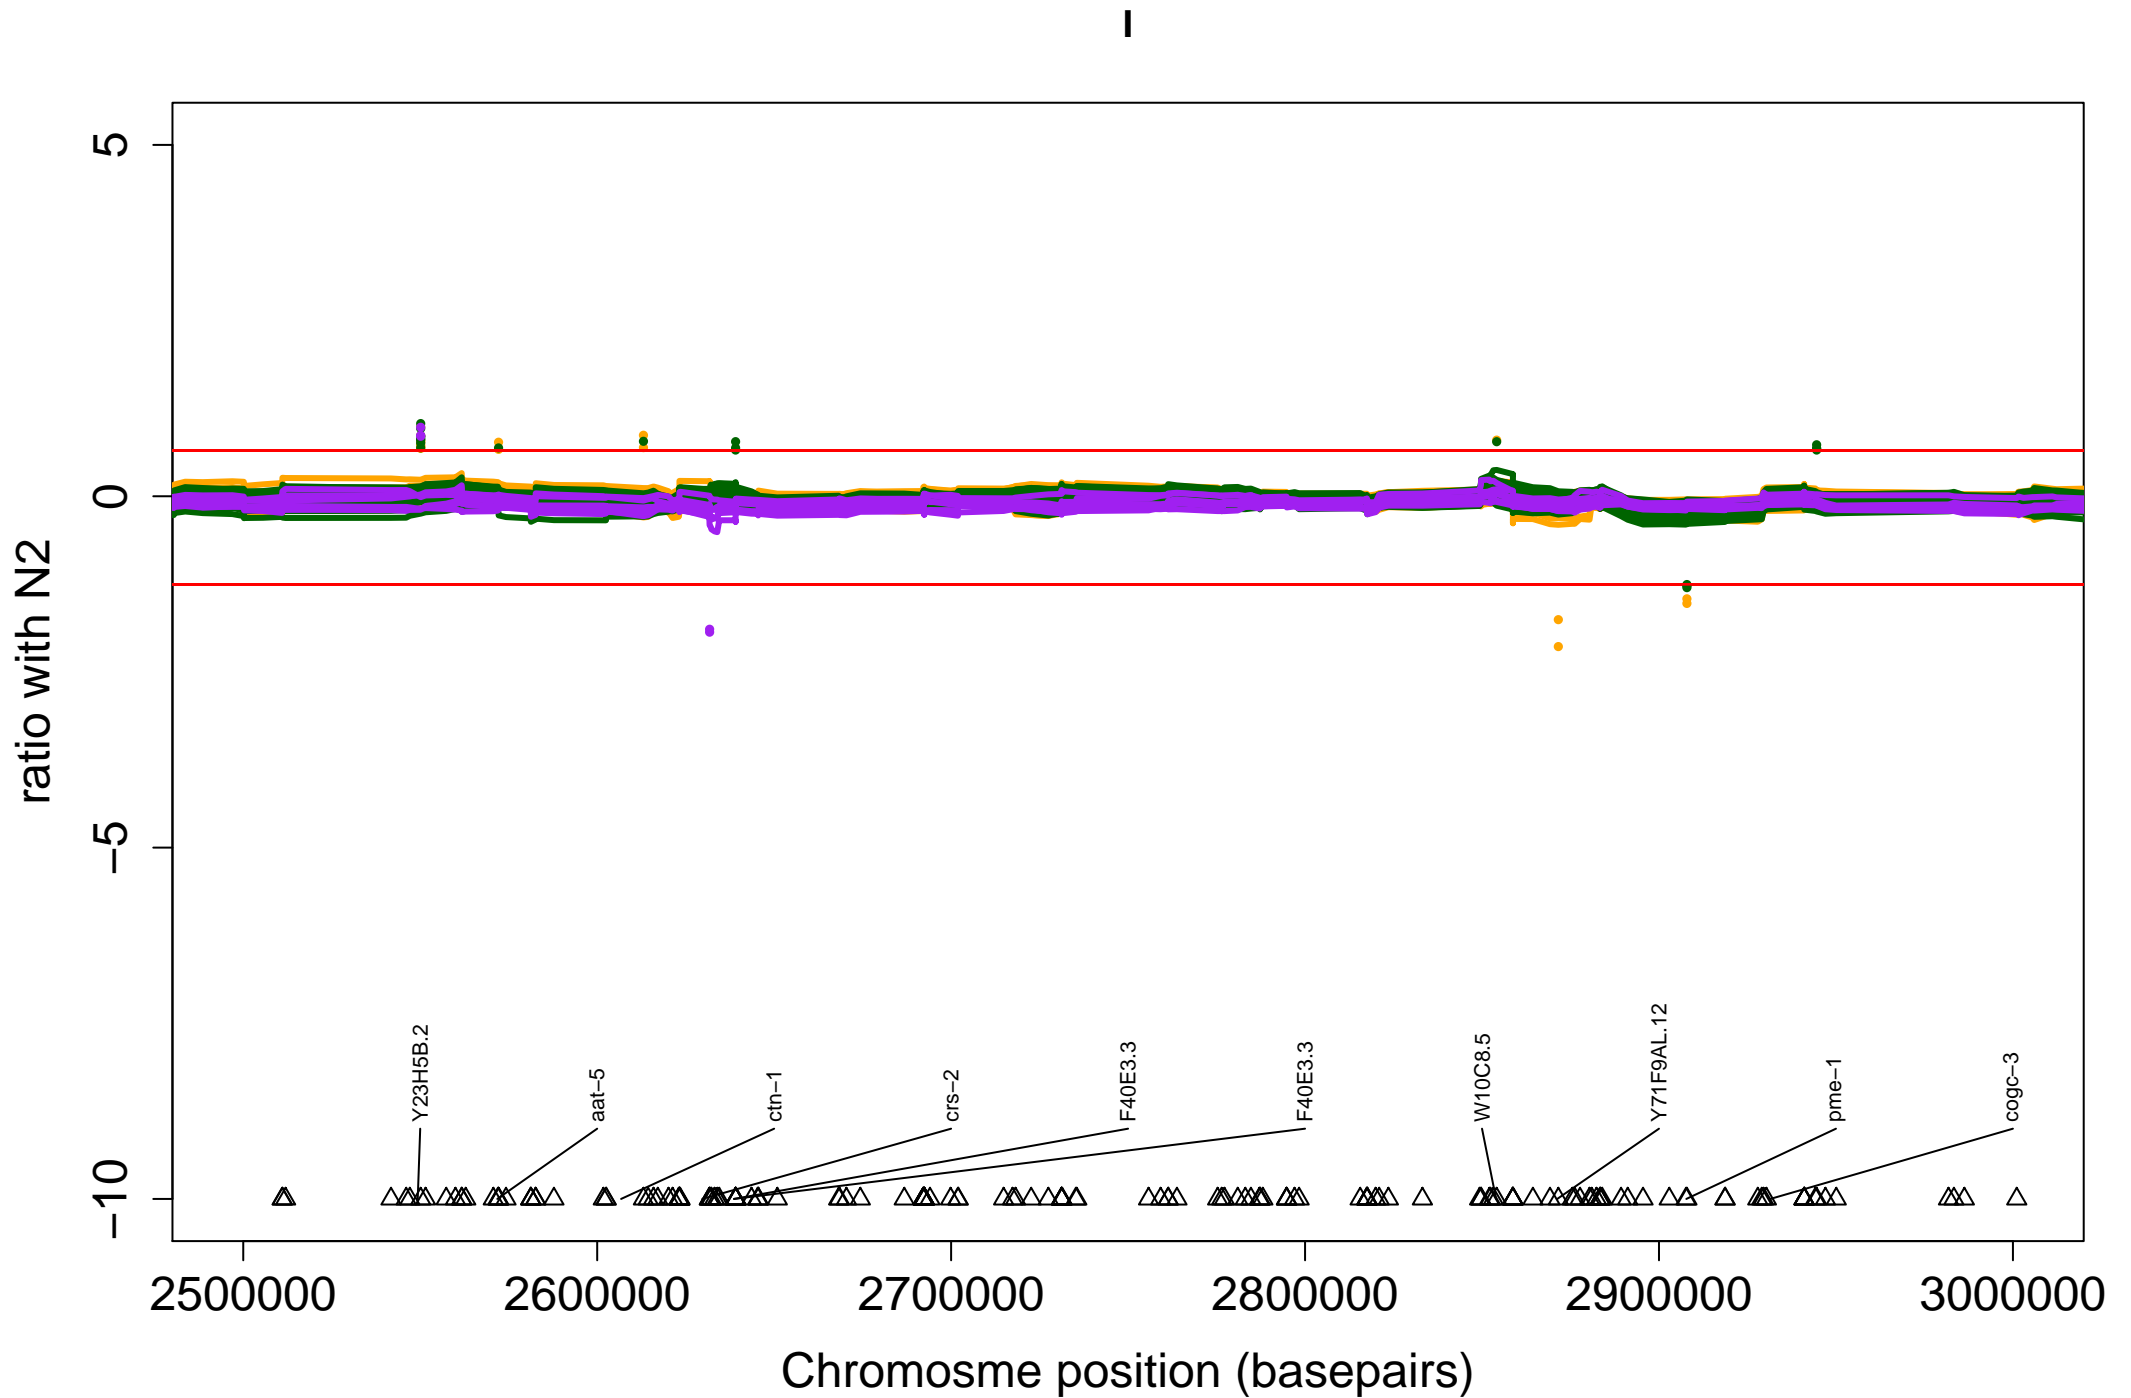

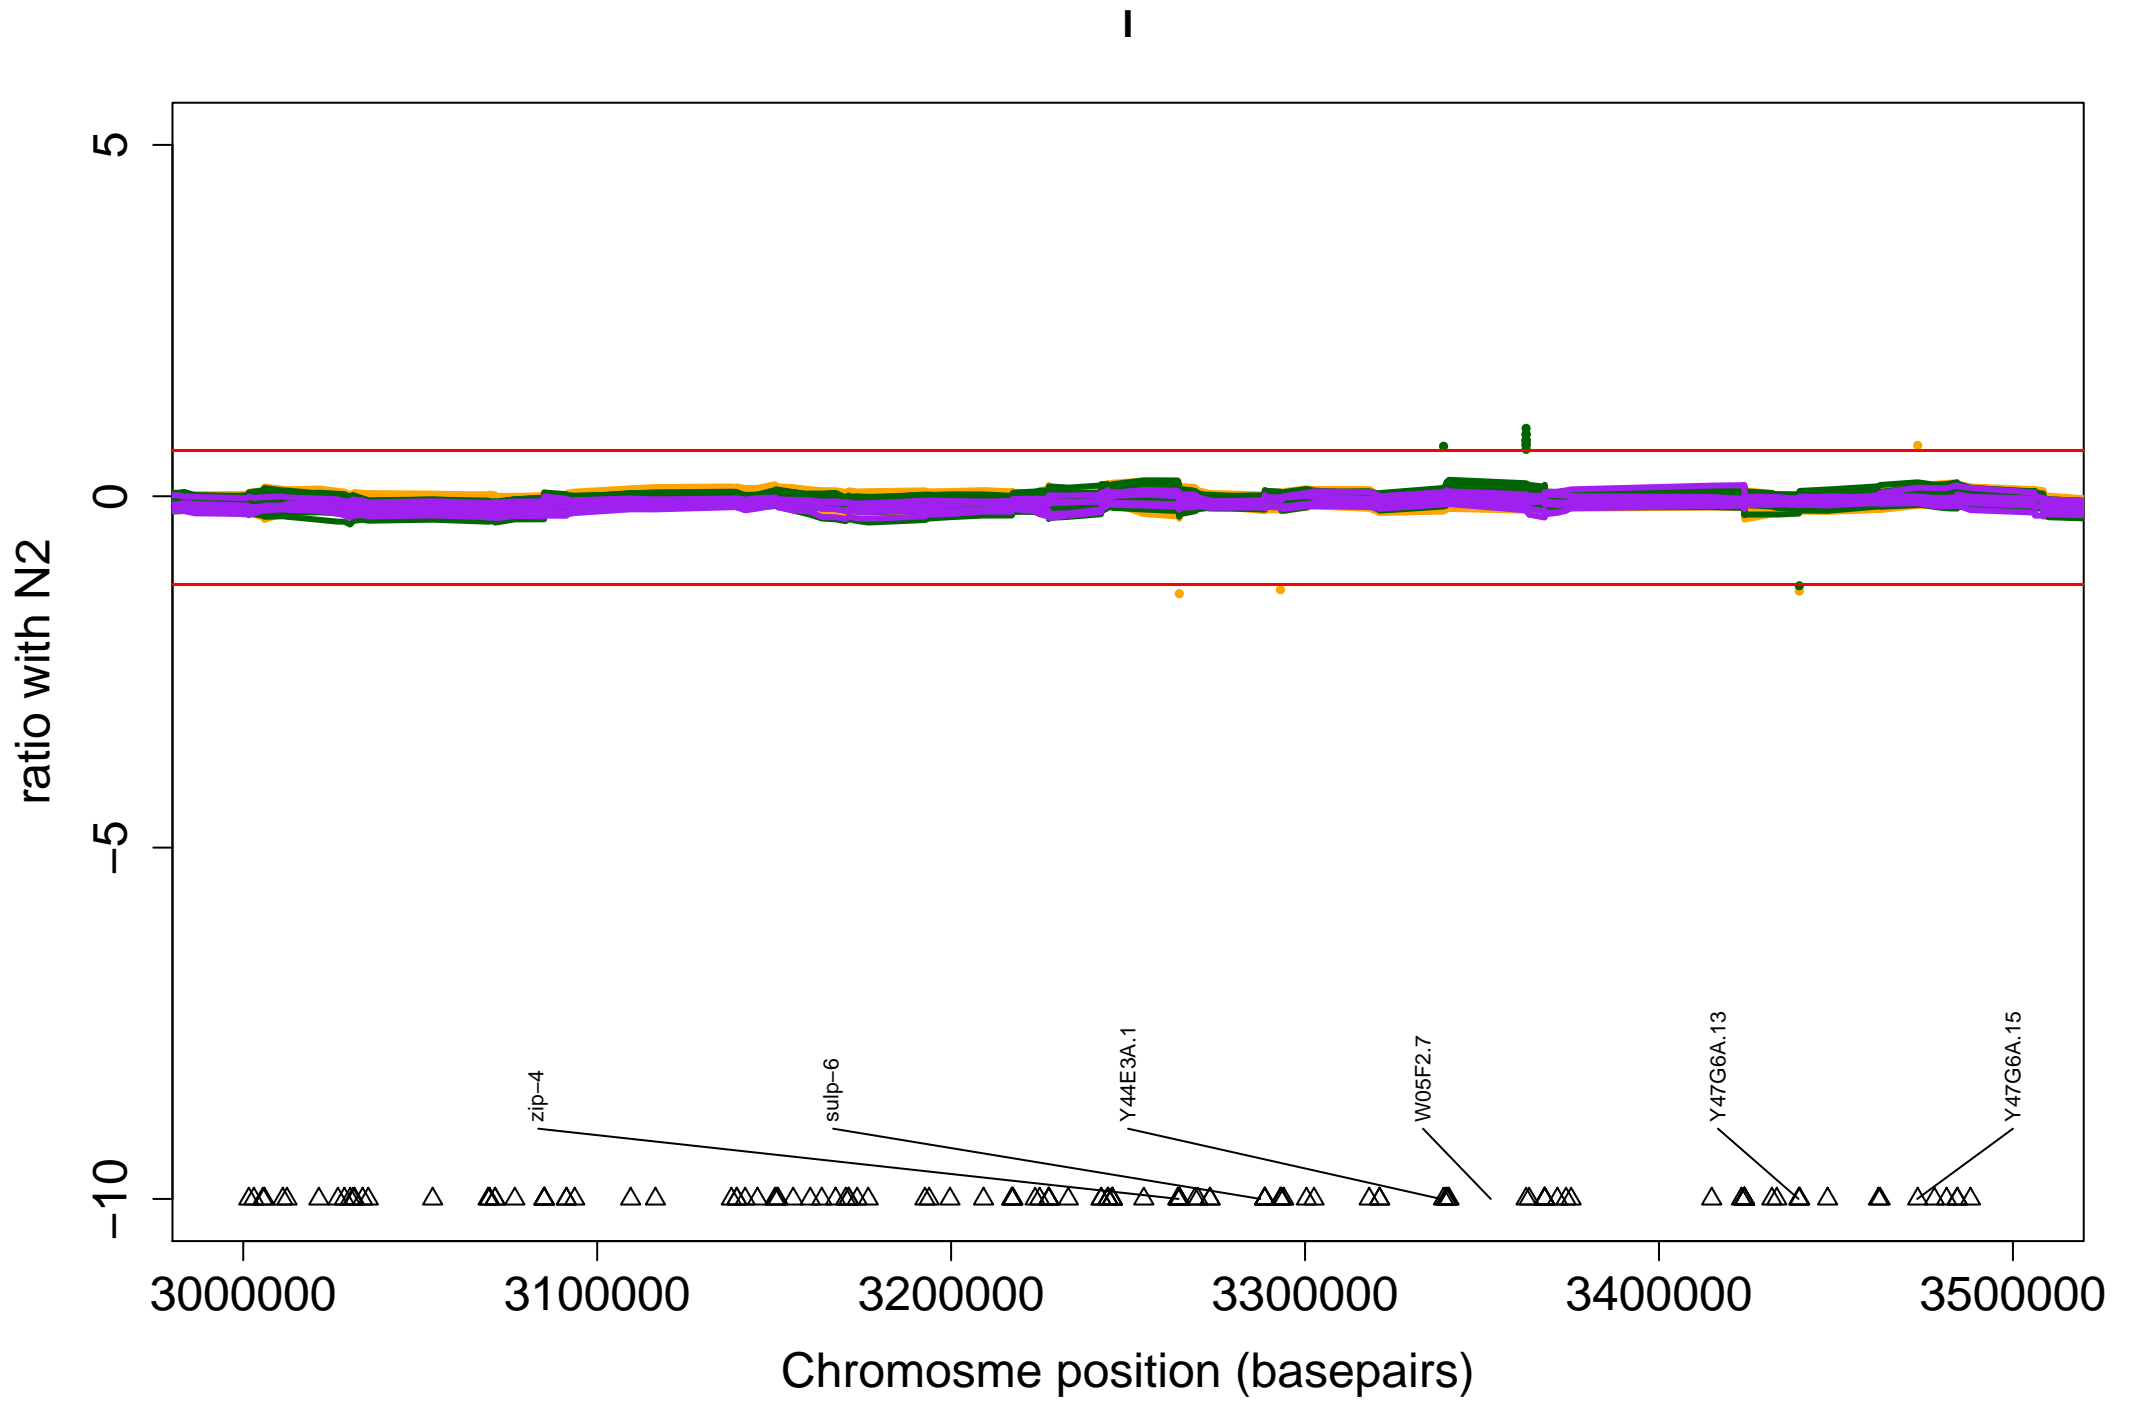

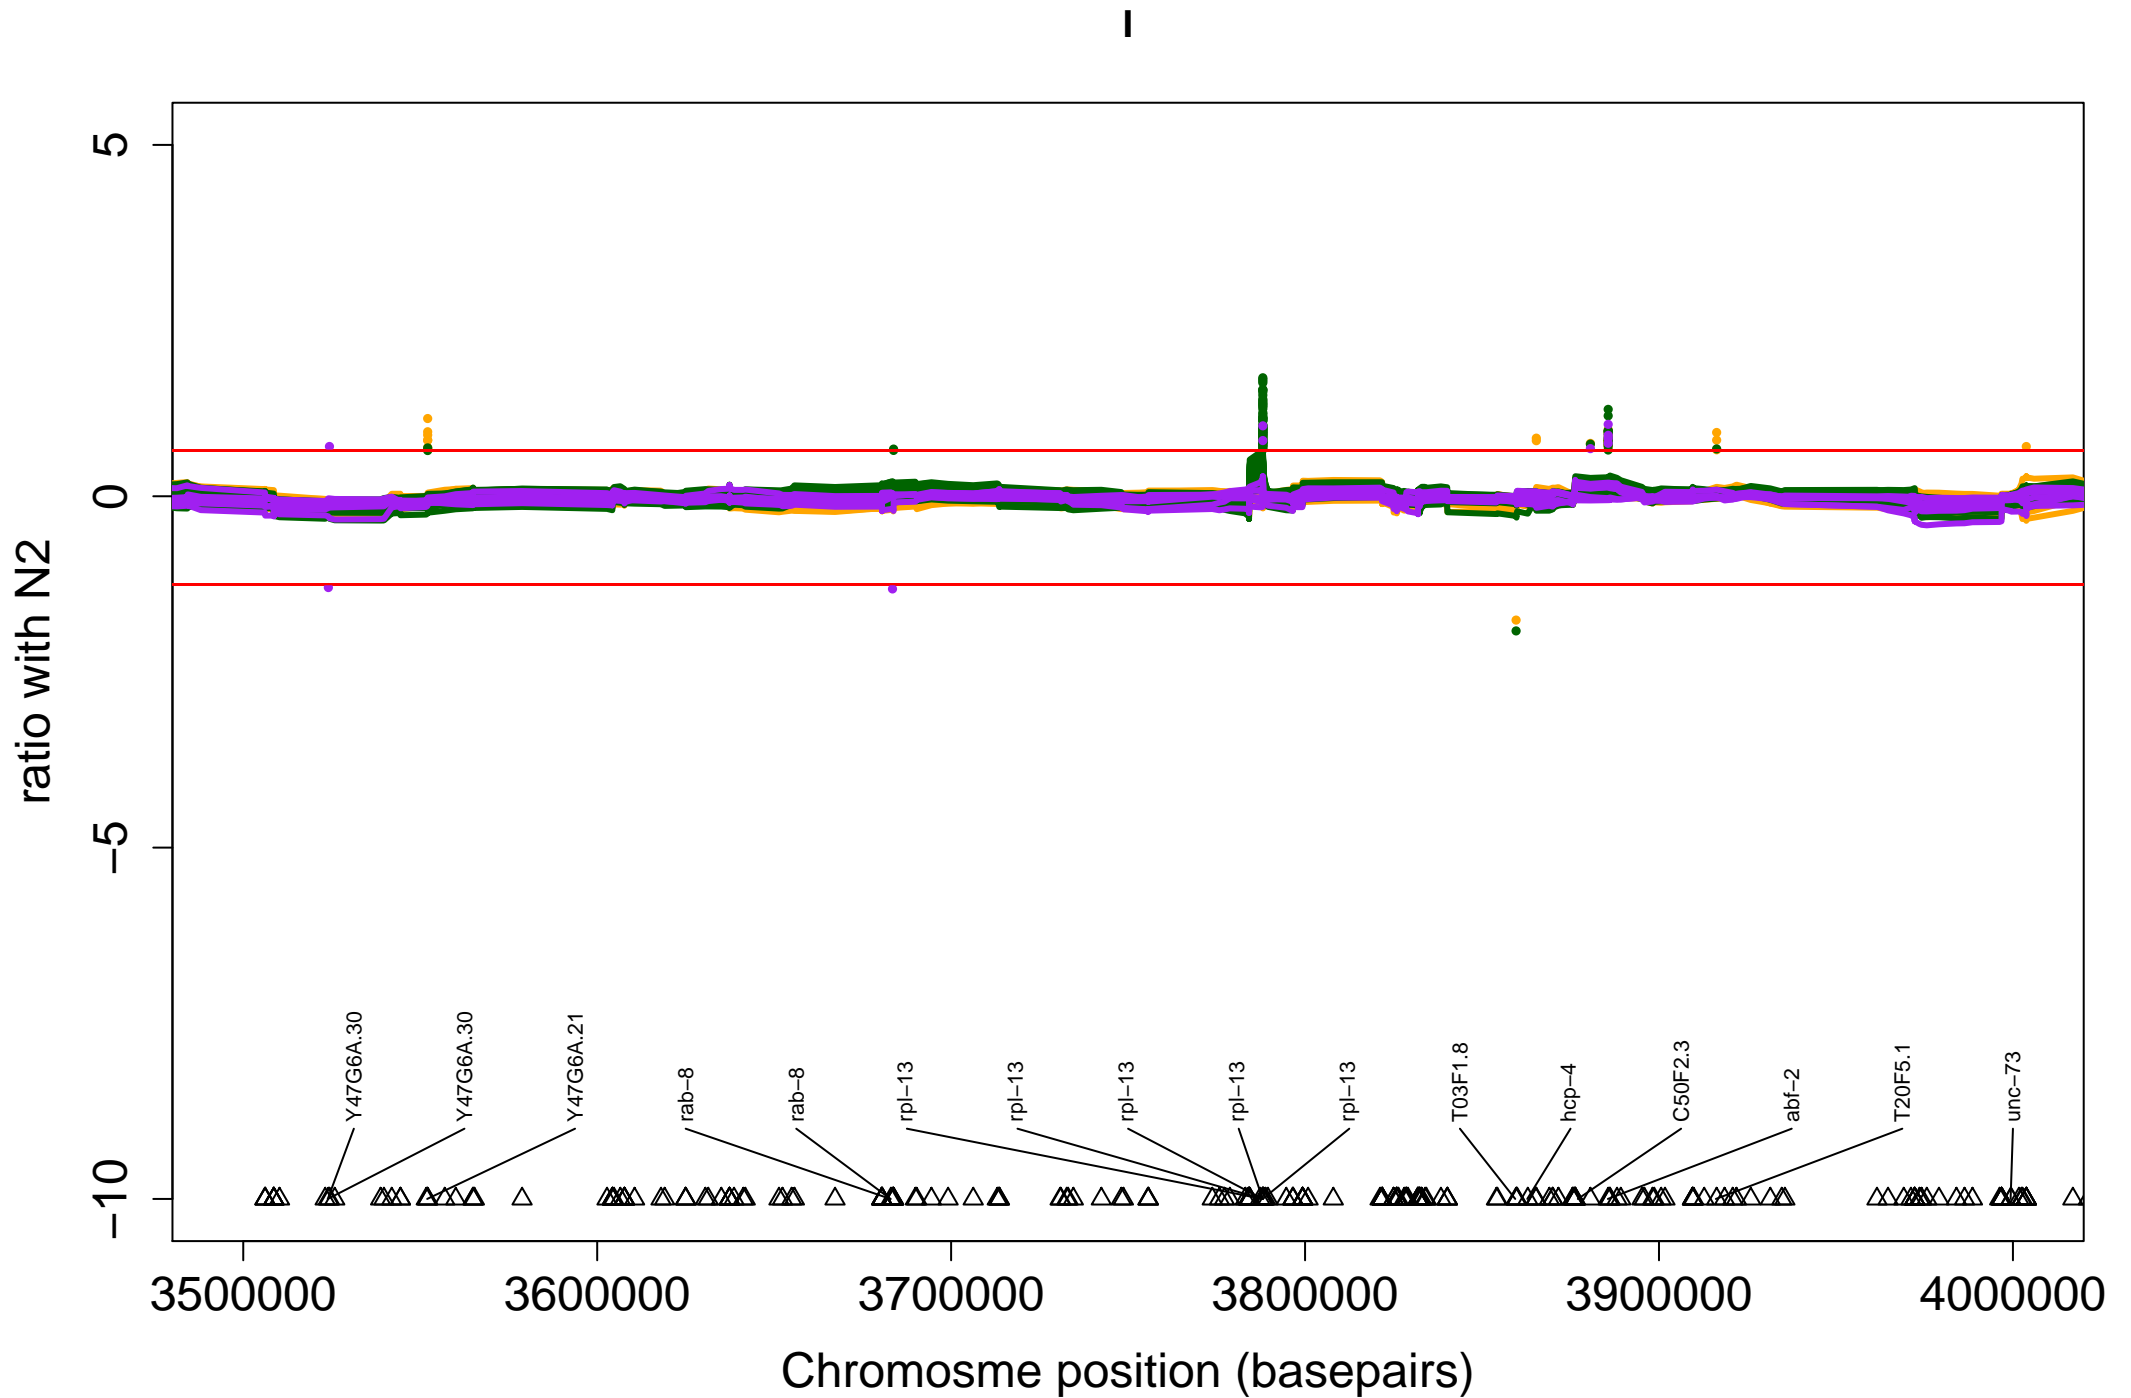



I

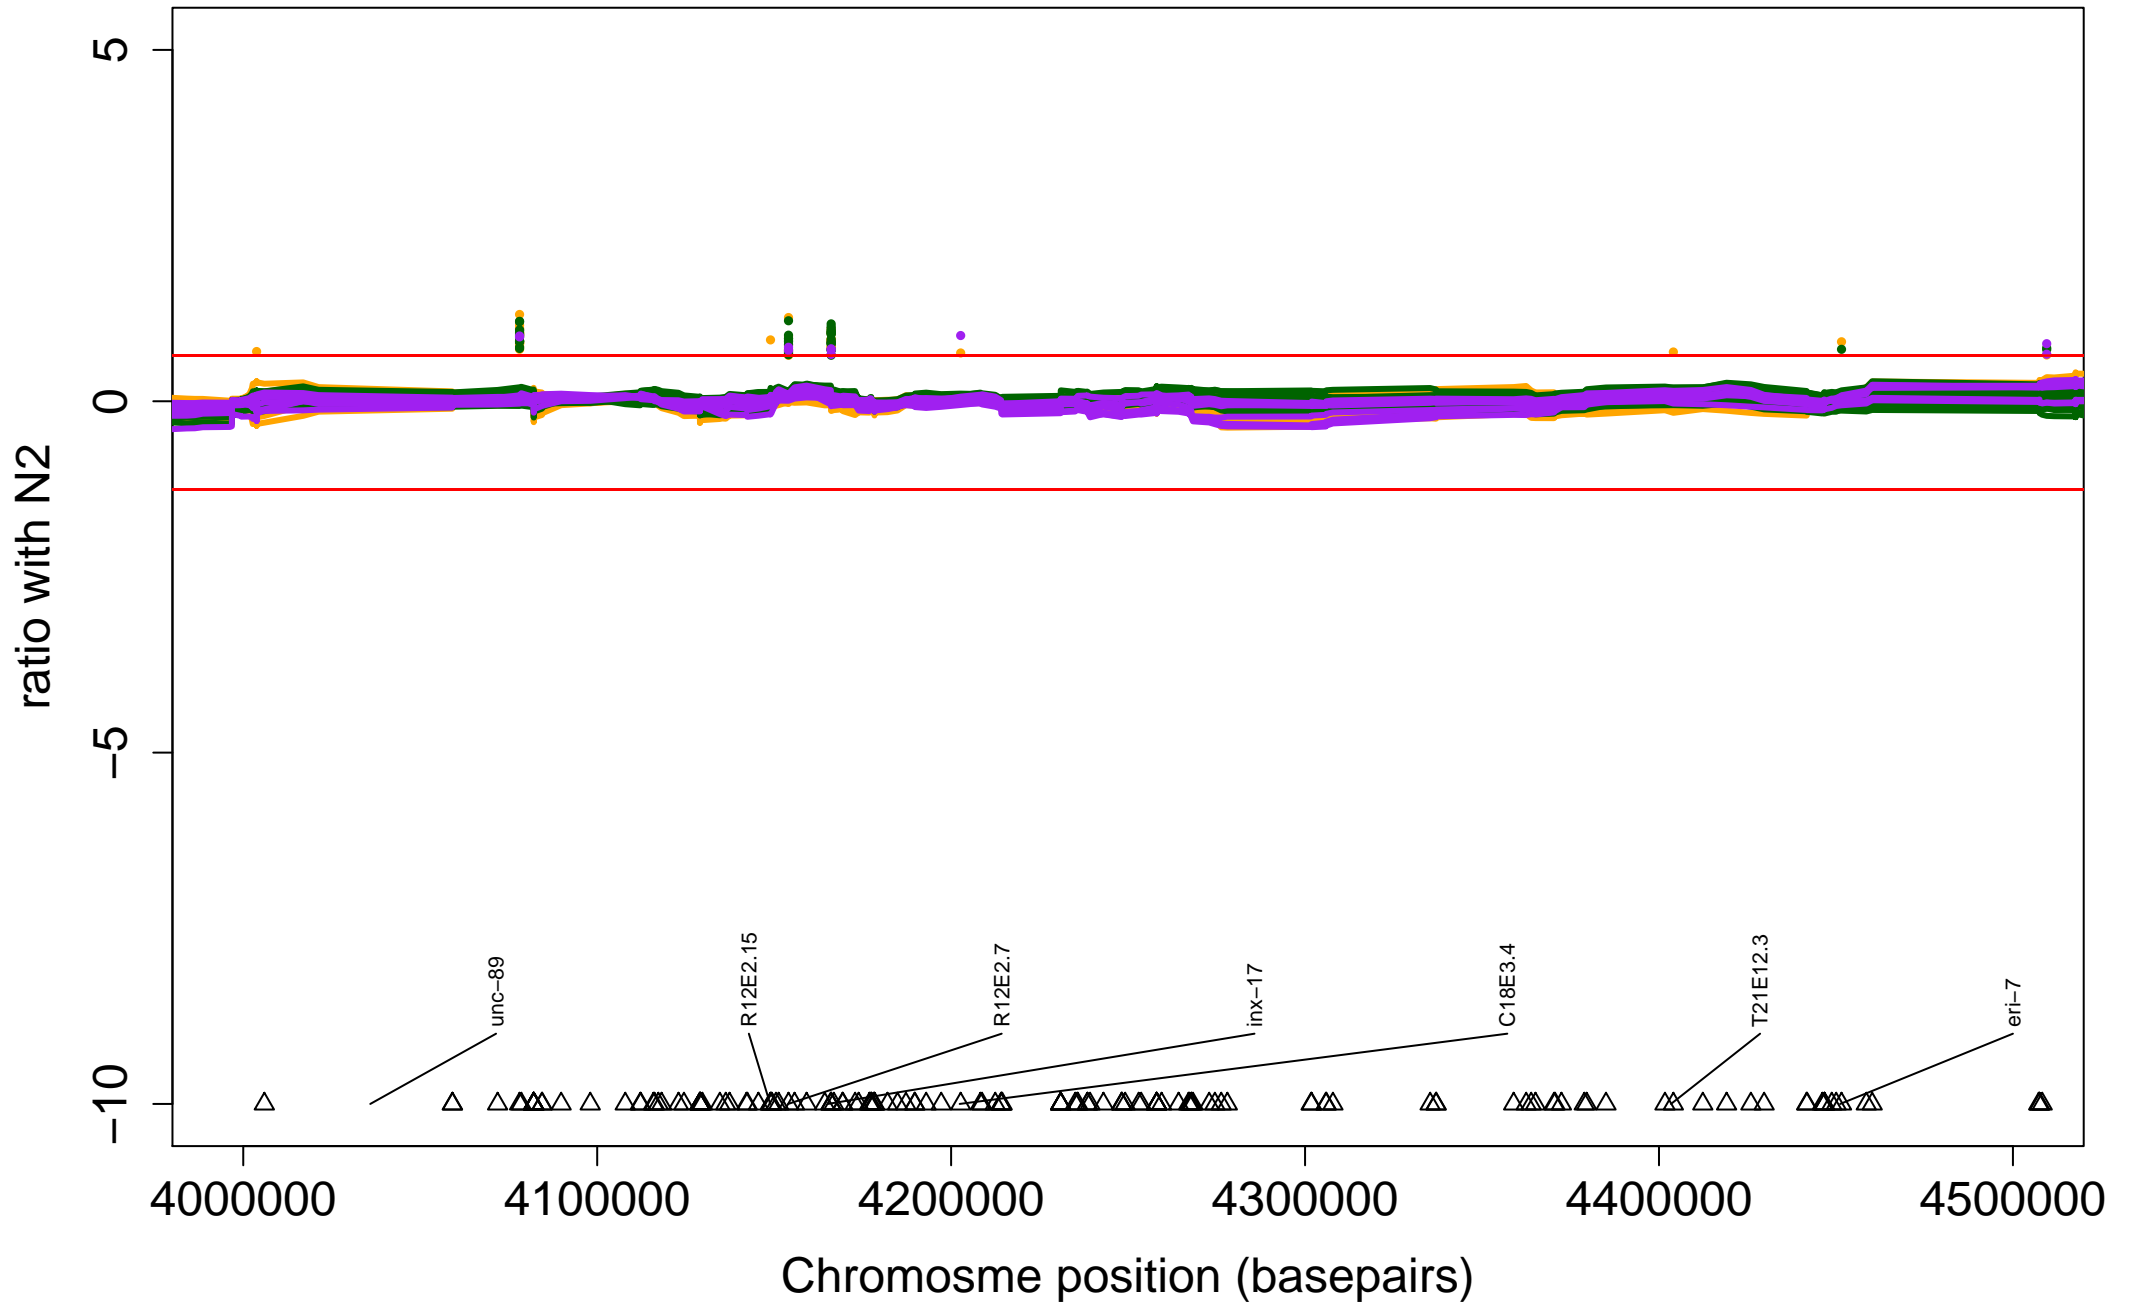

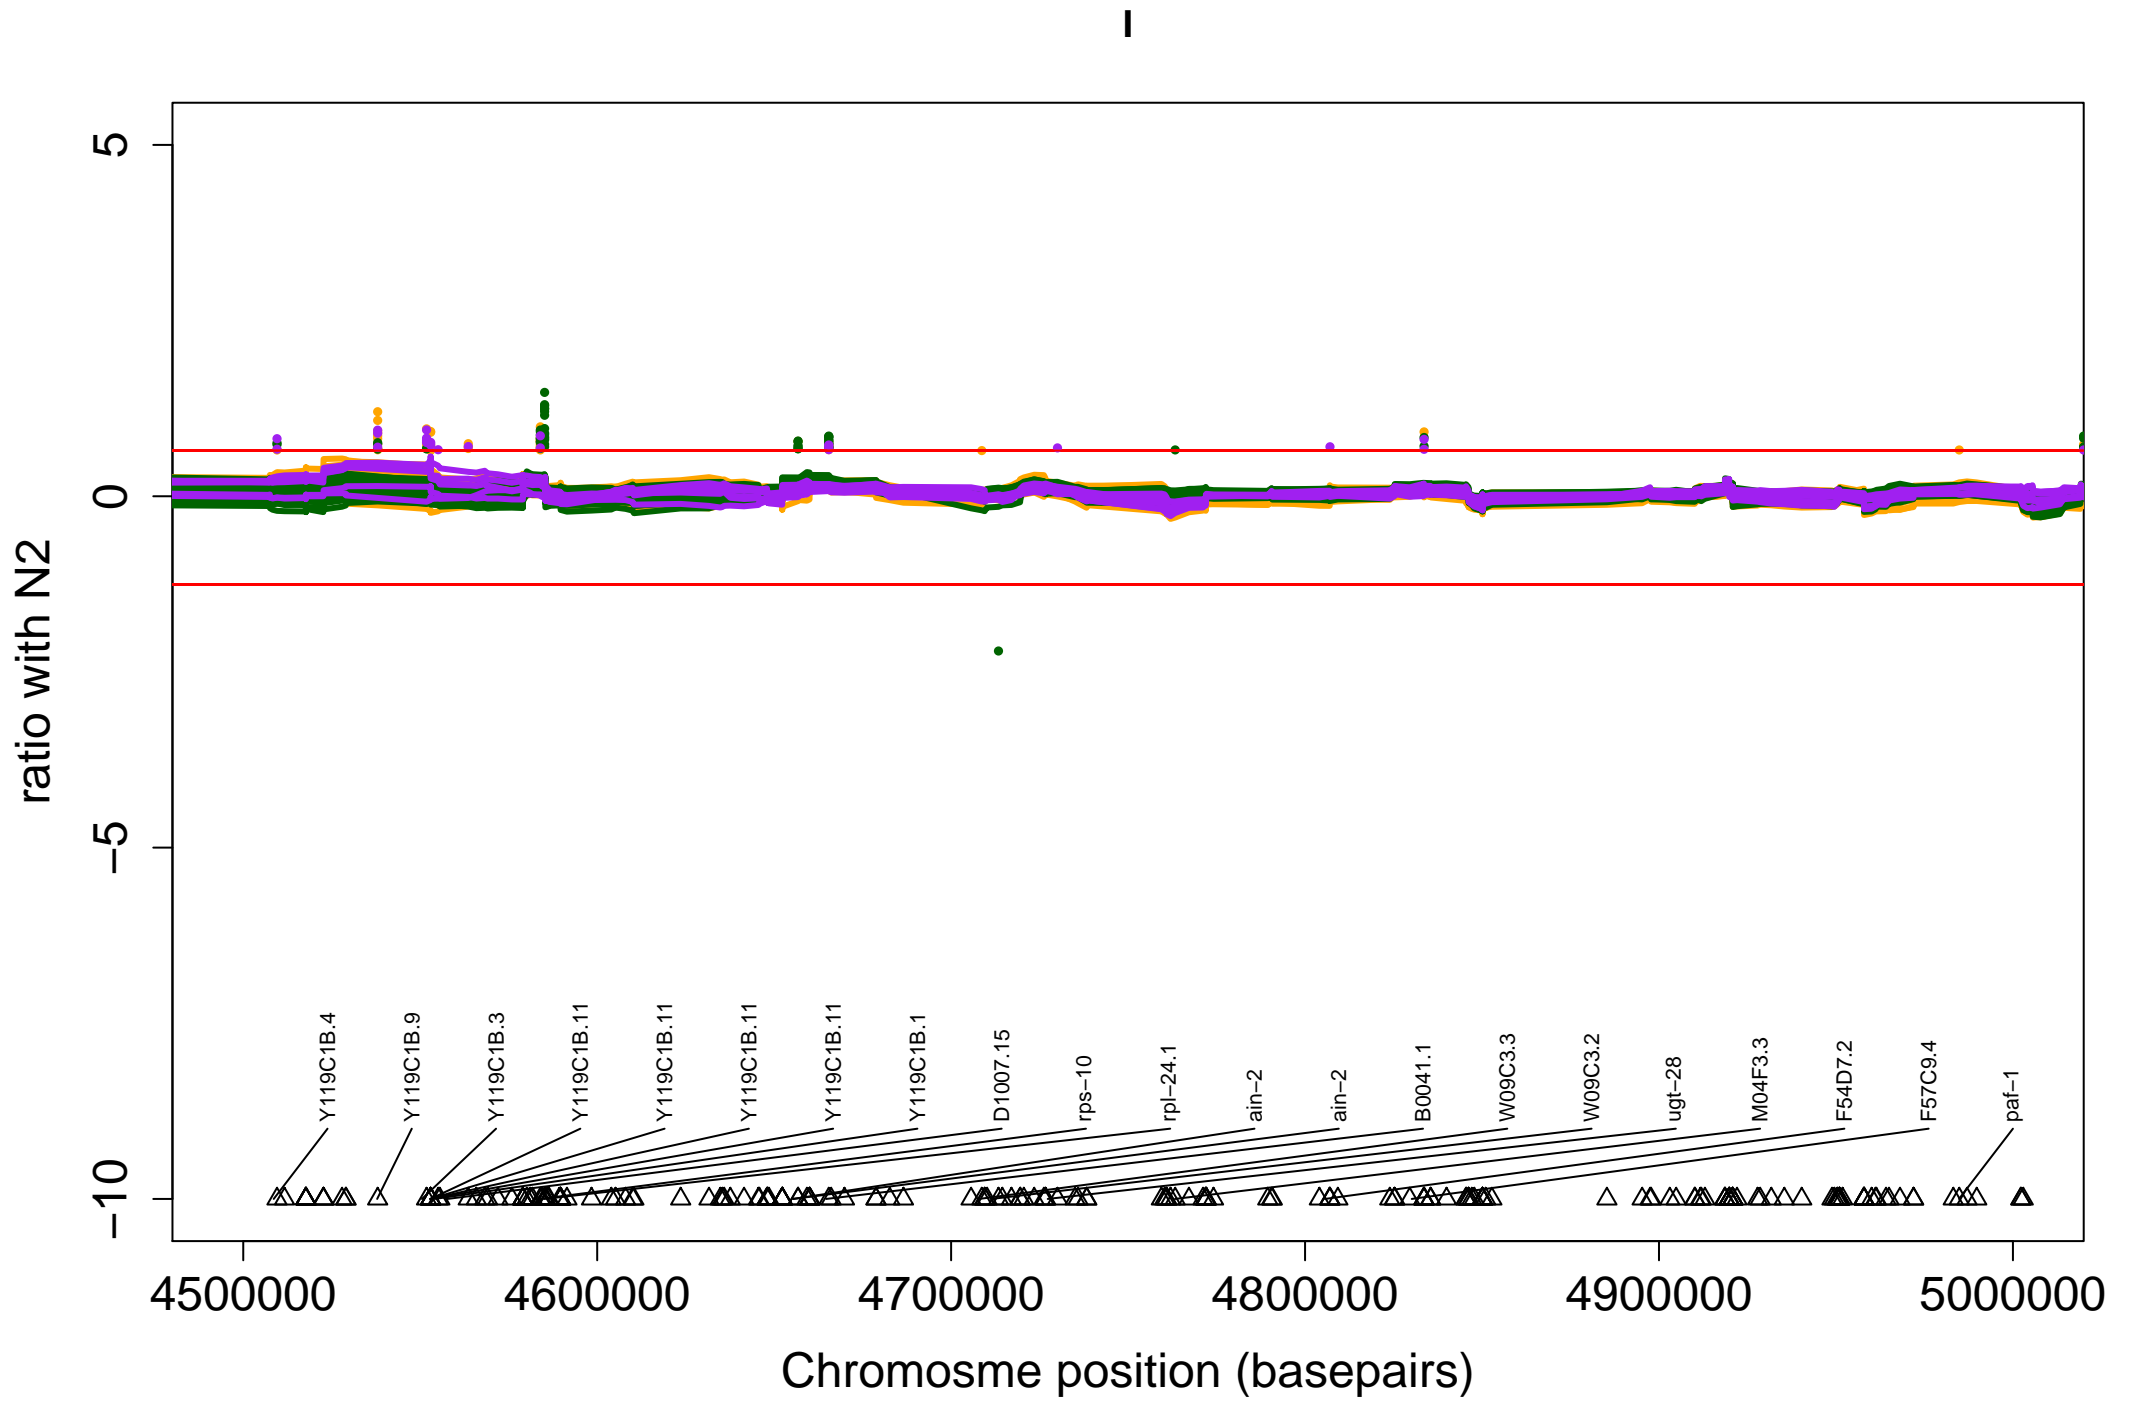

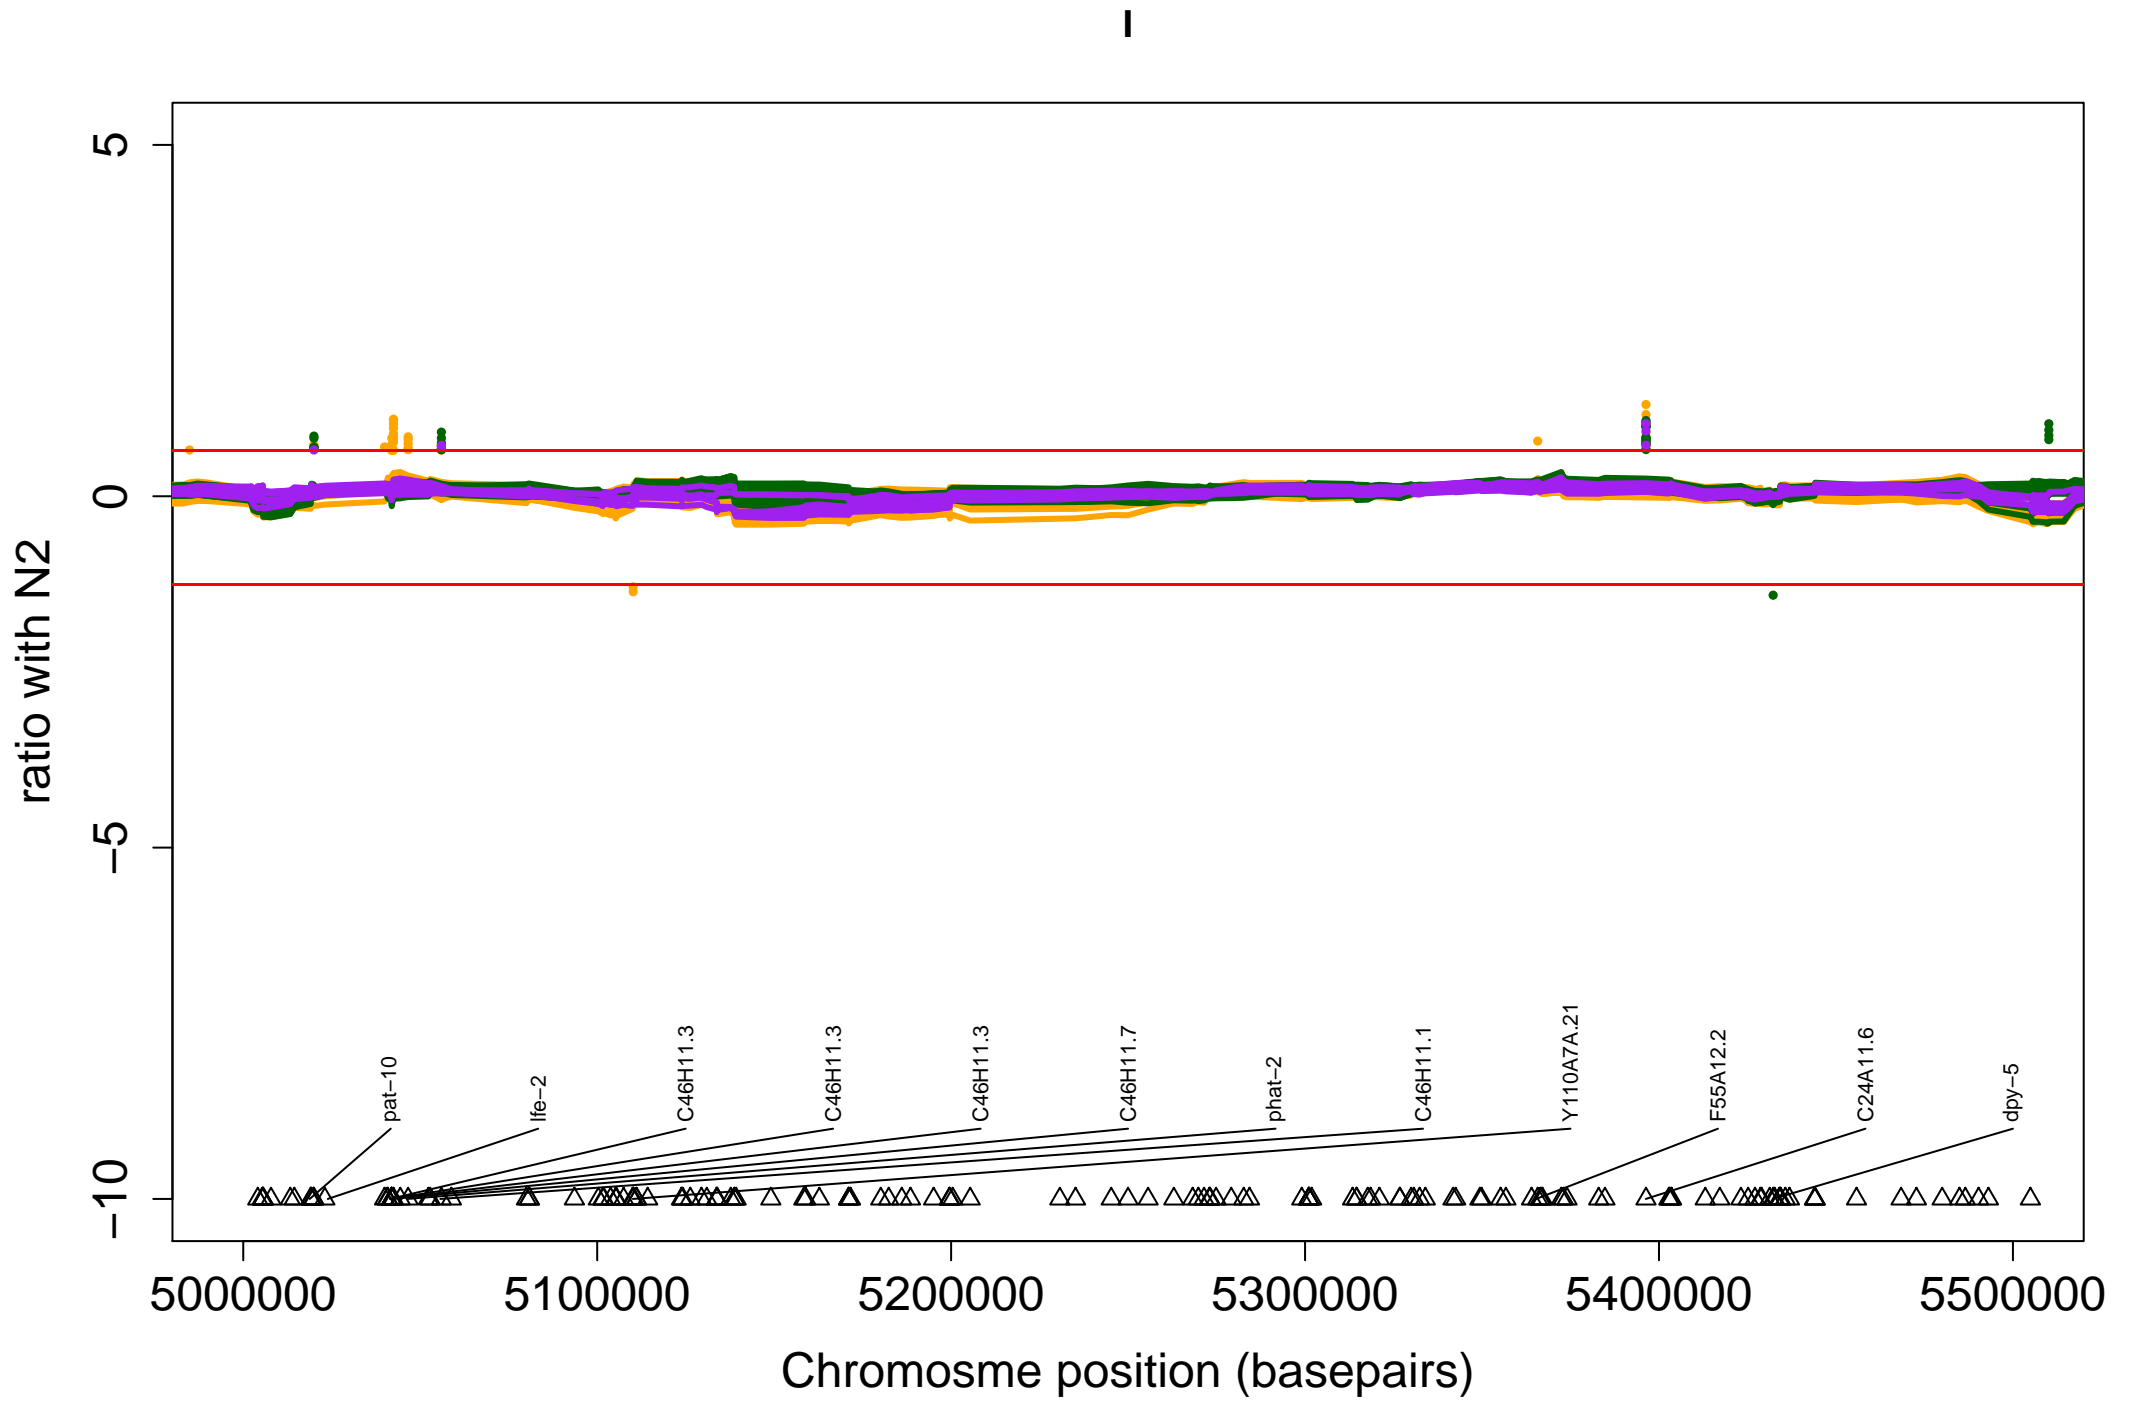

I

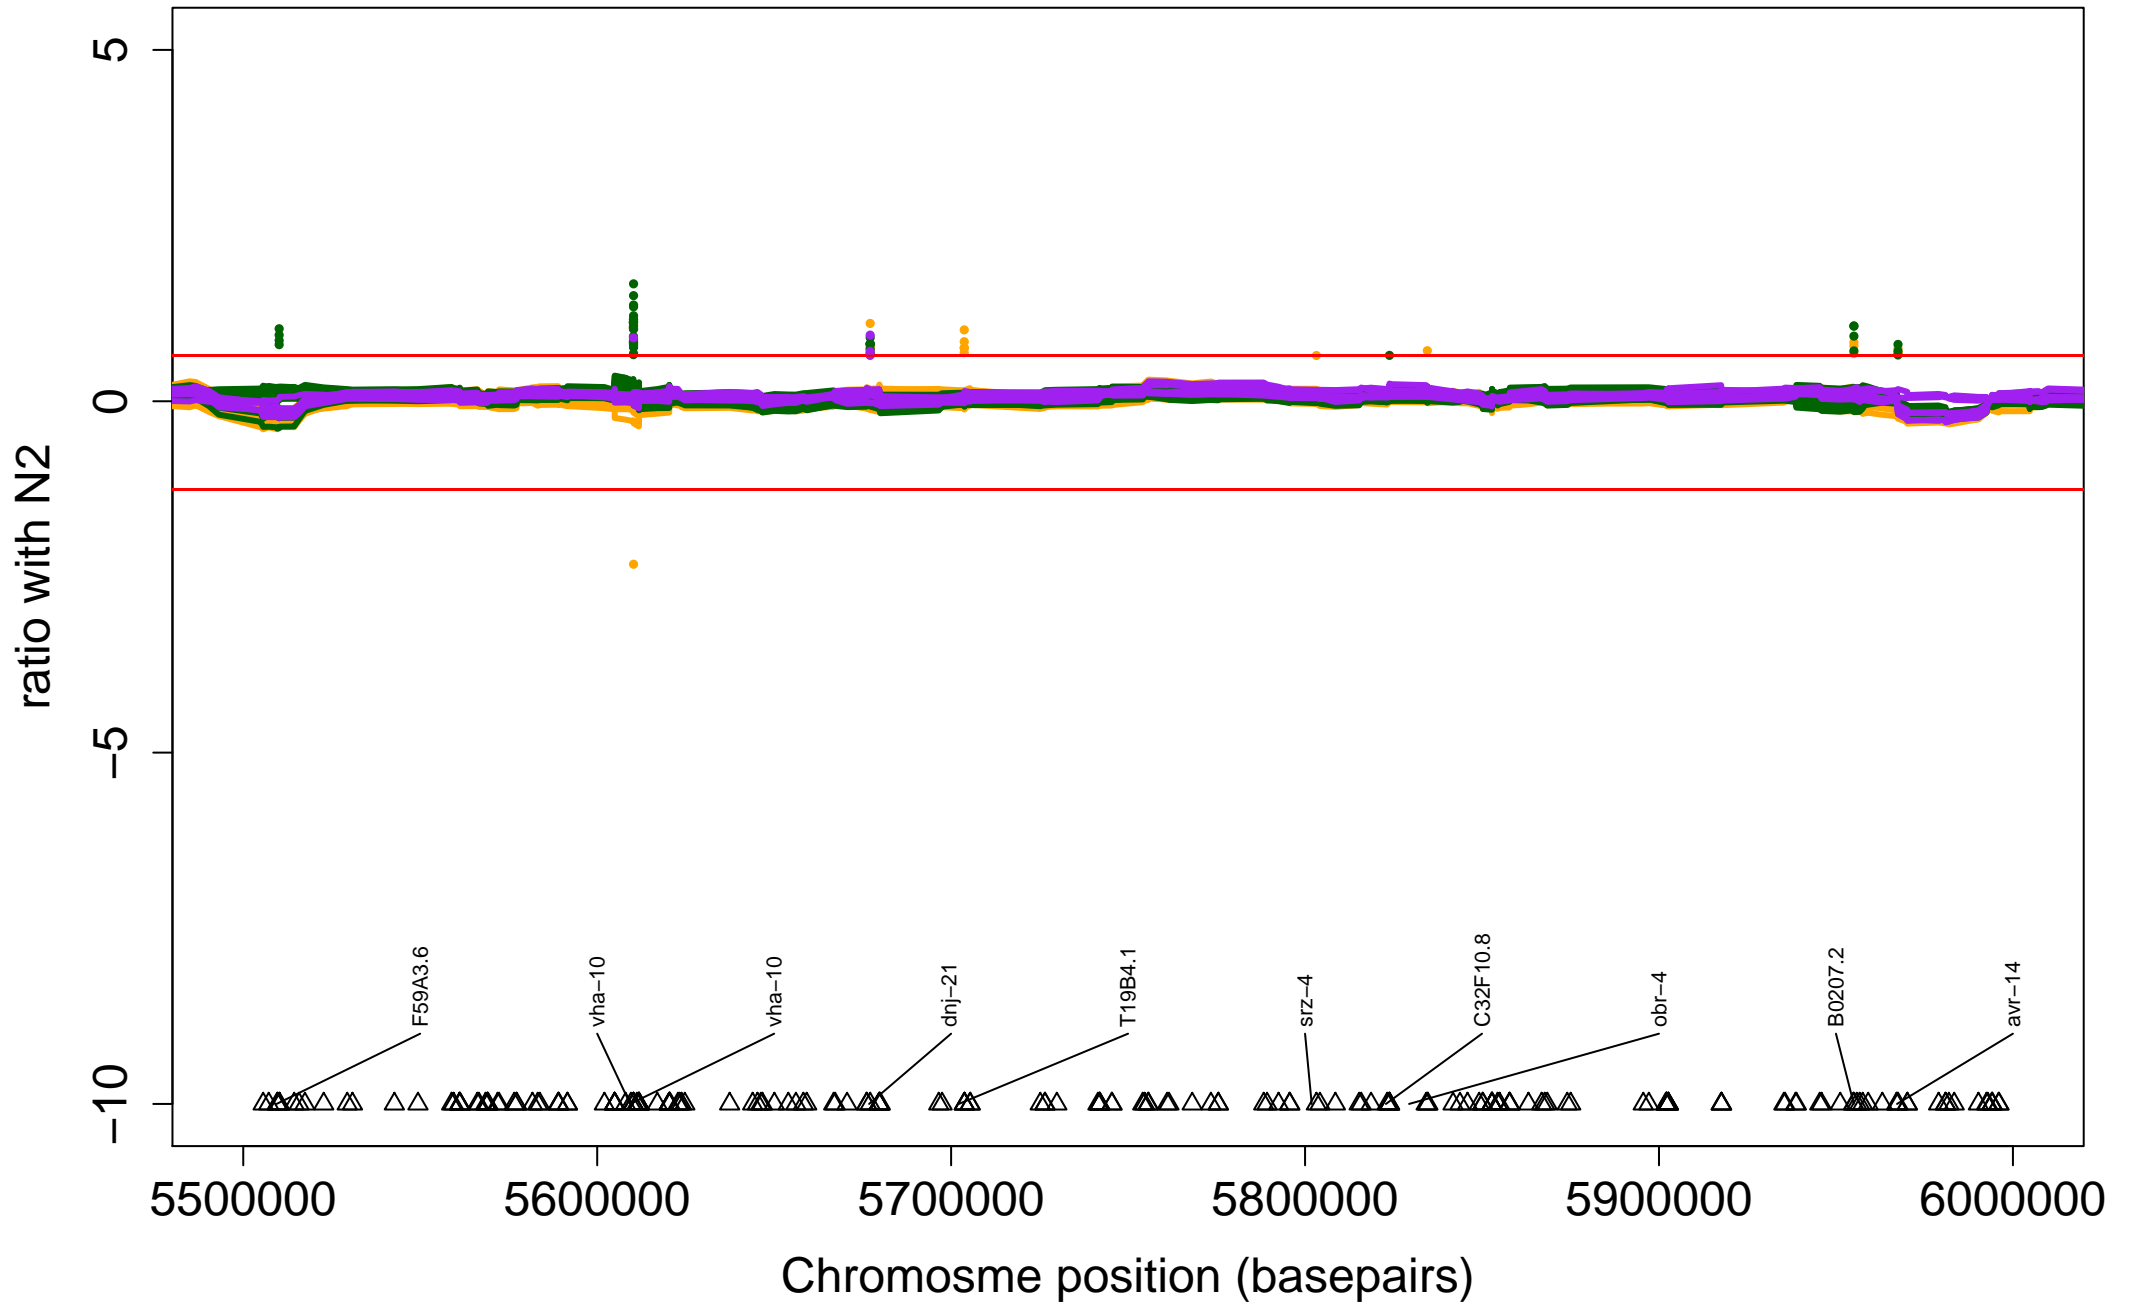

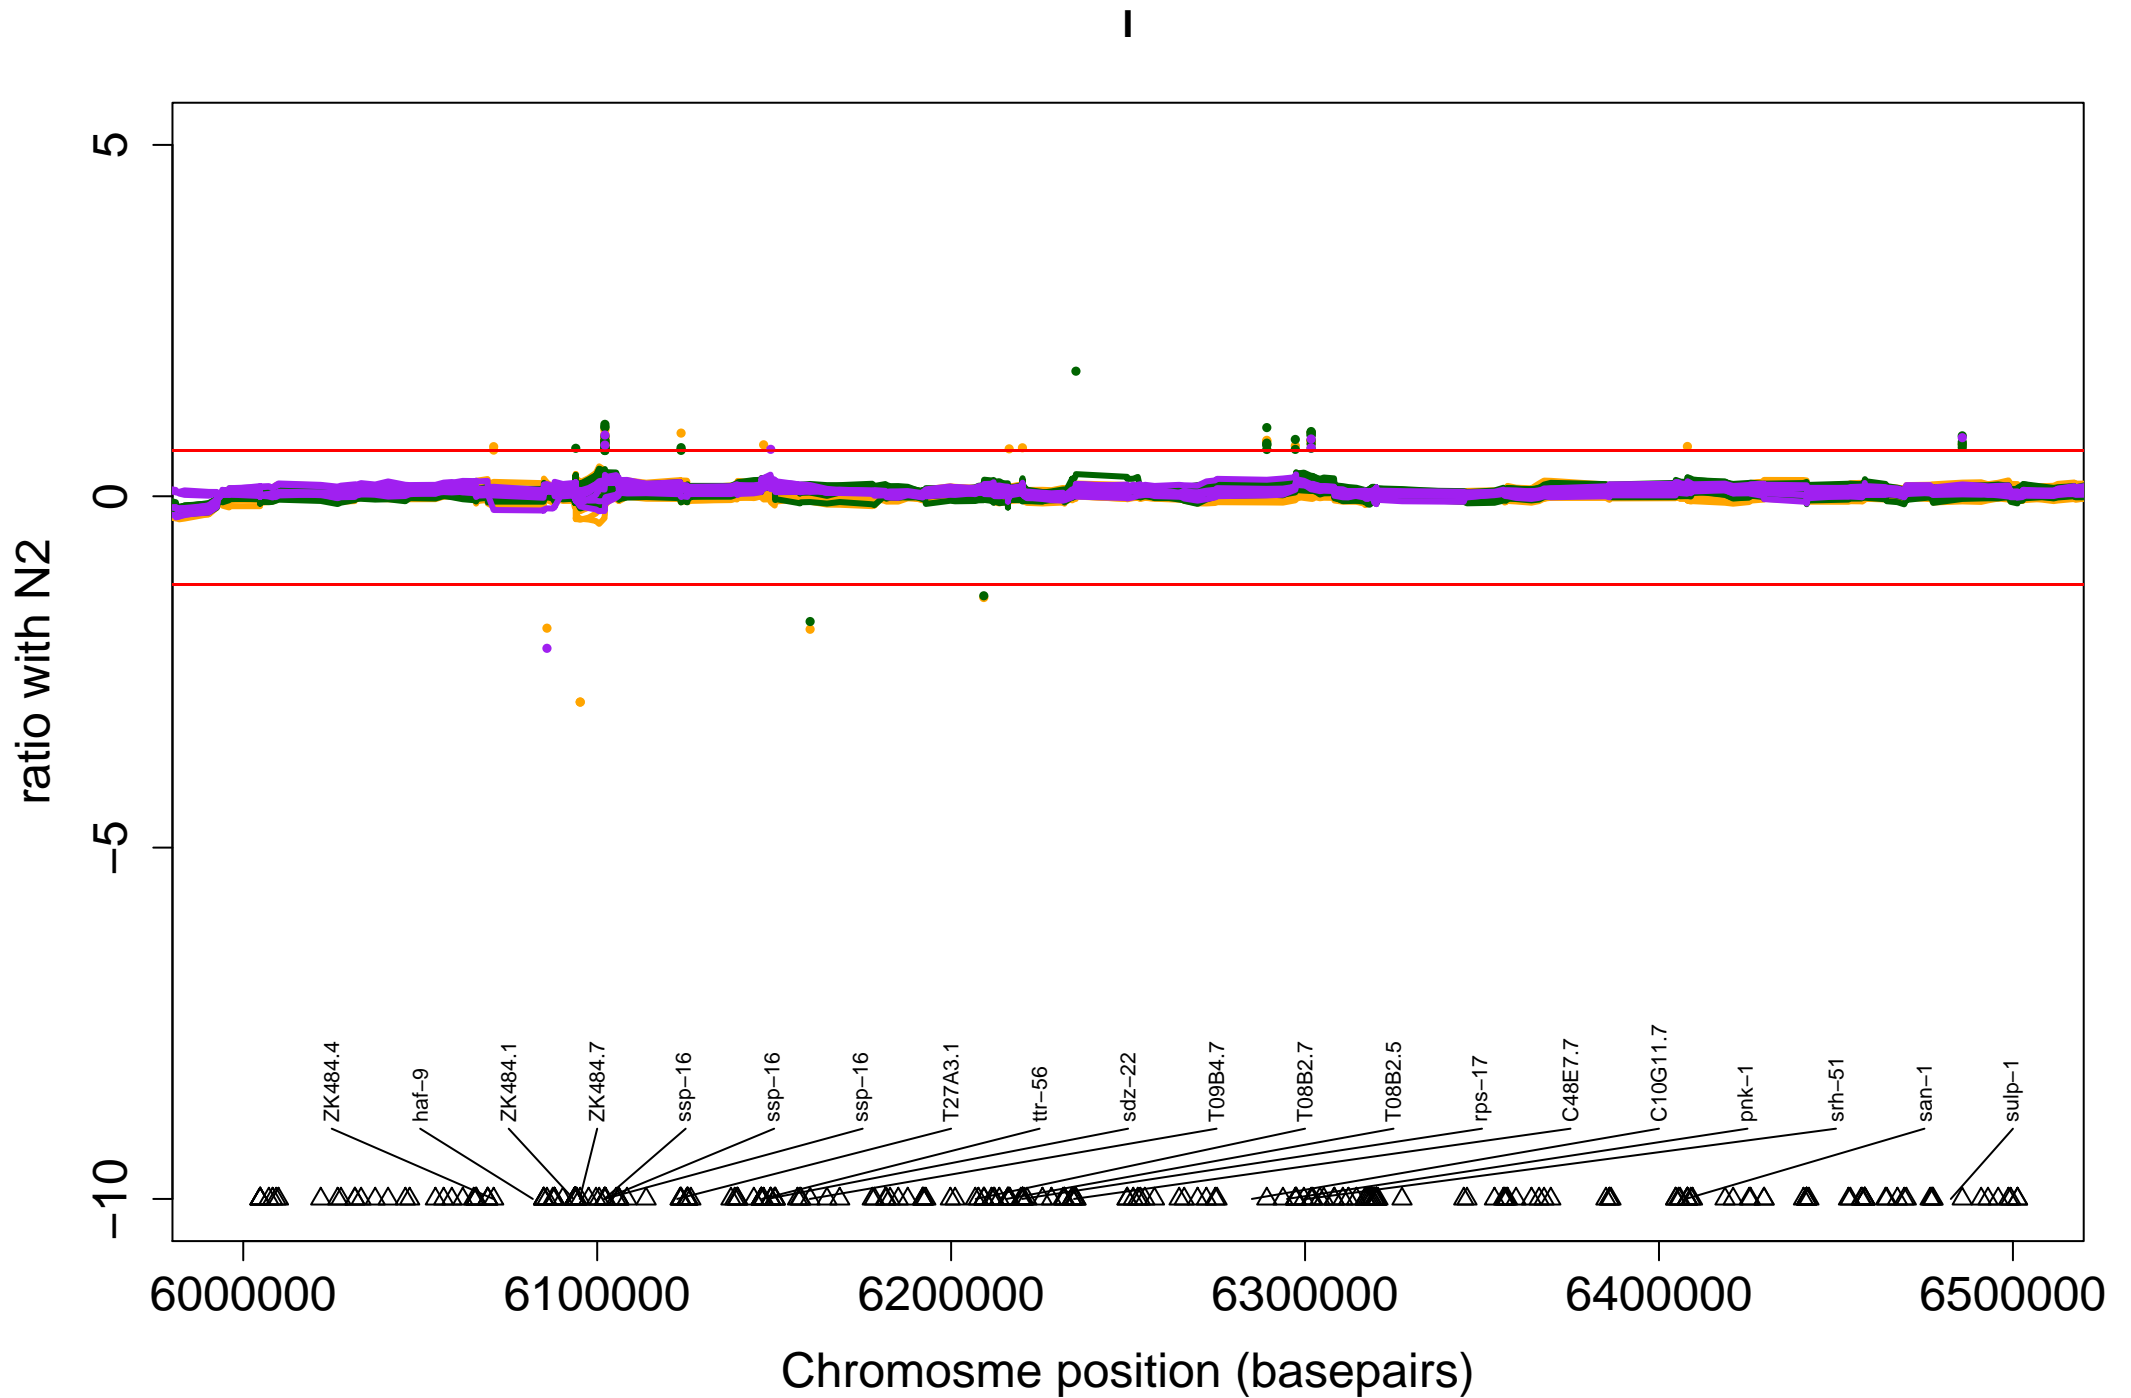

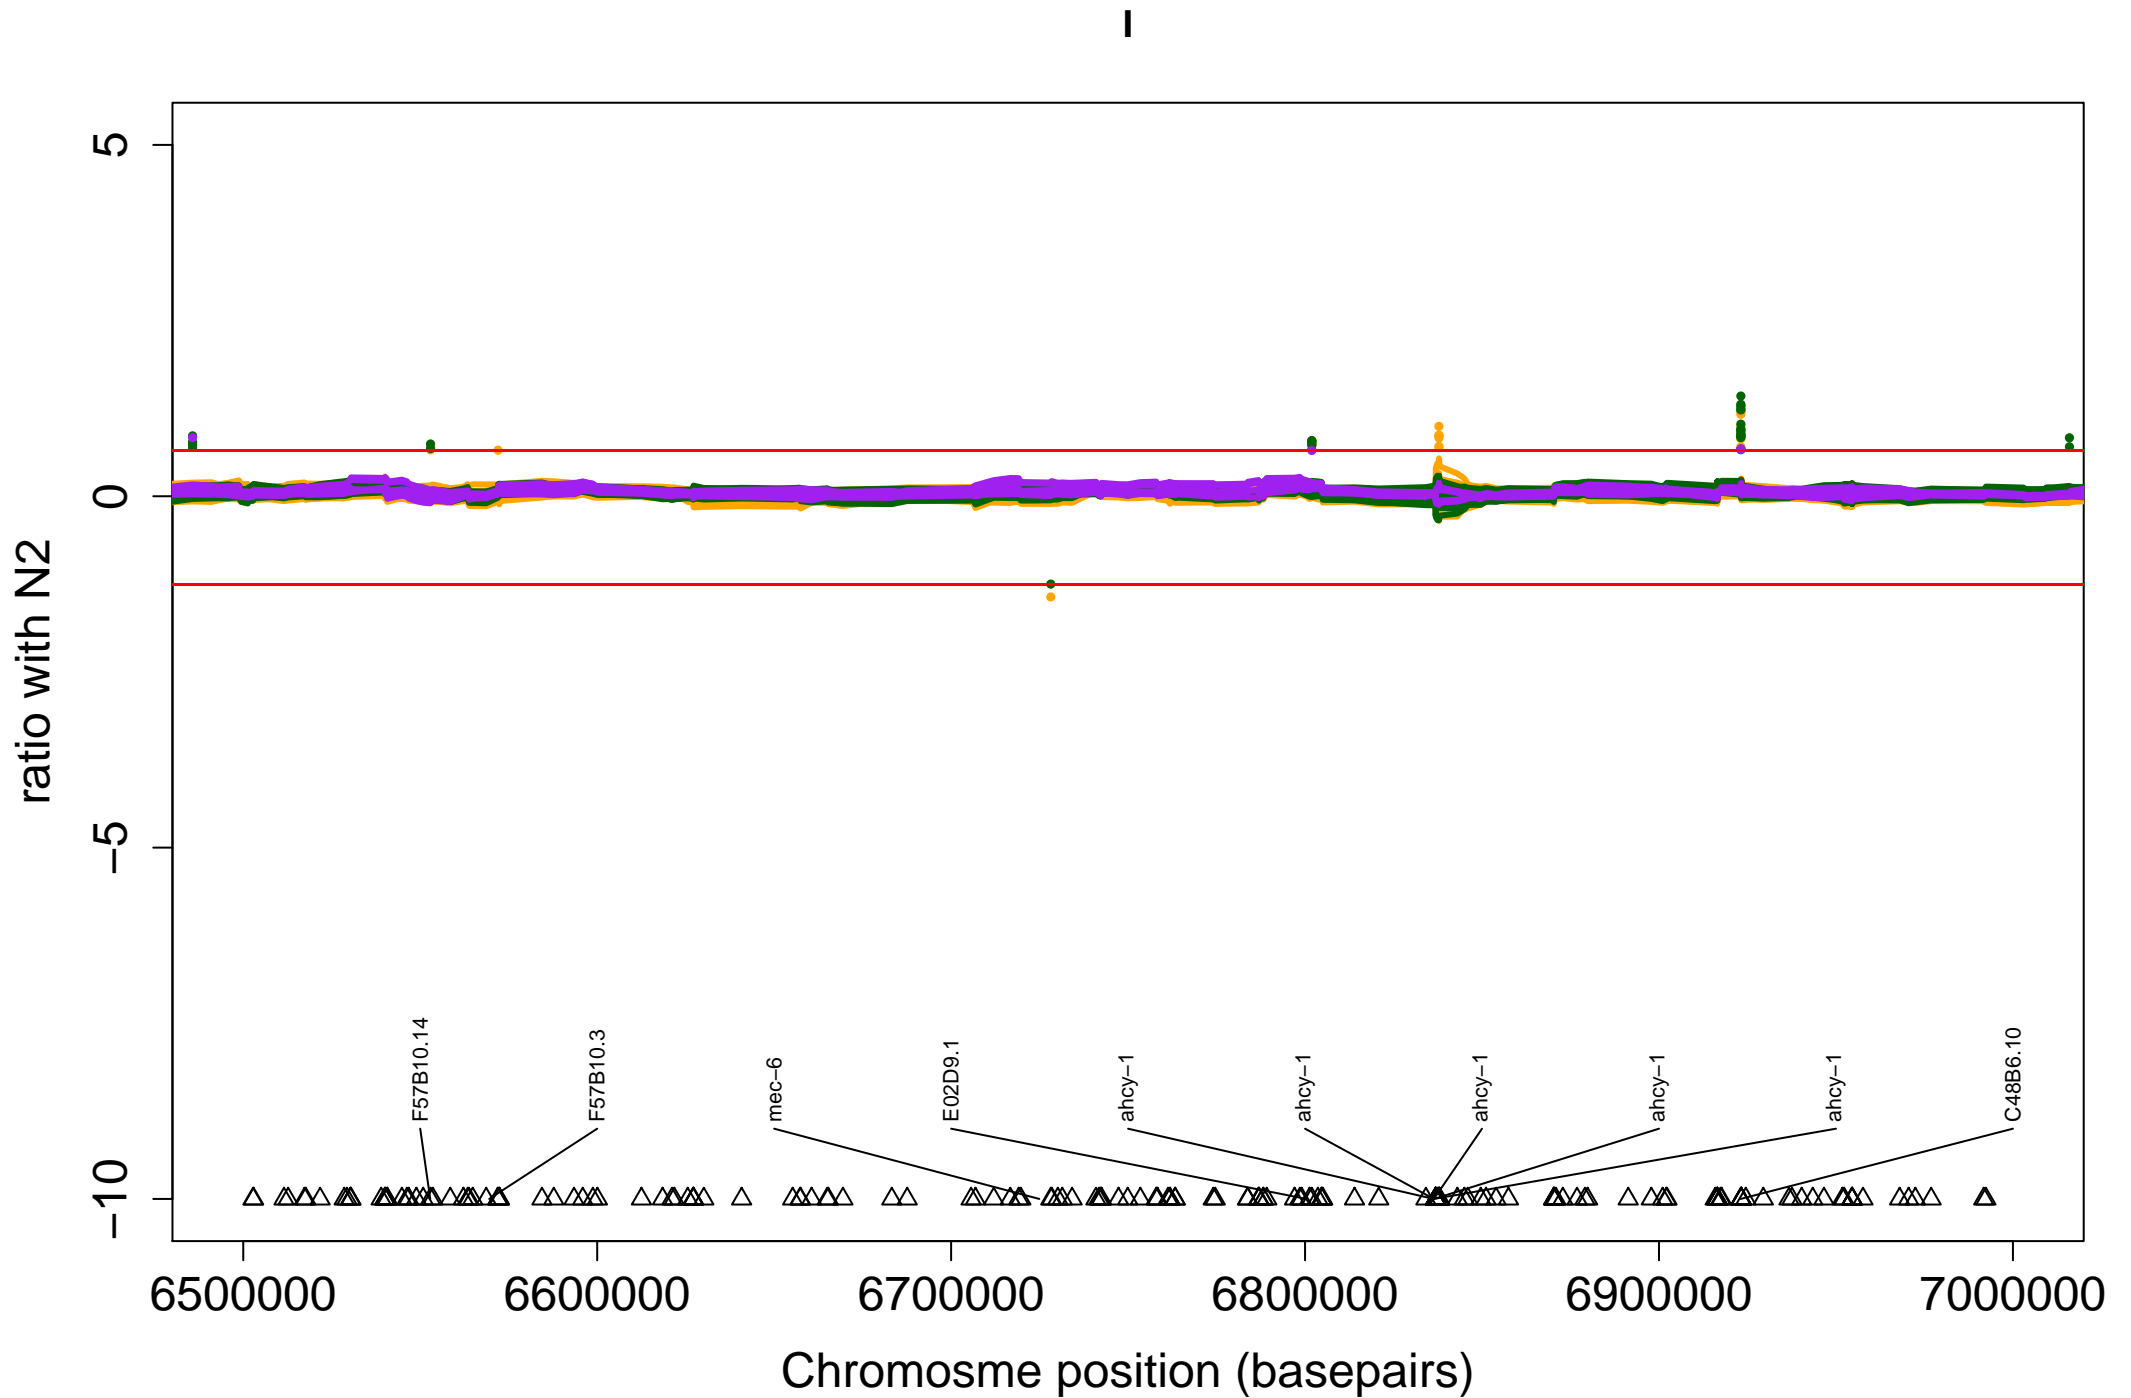

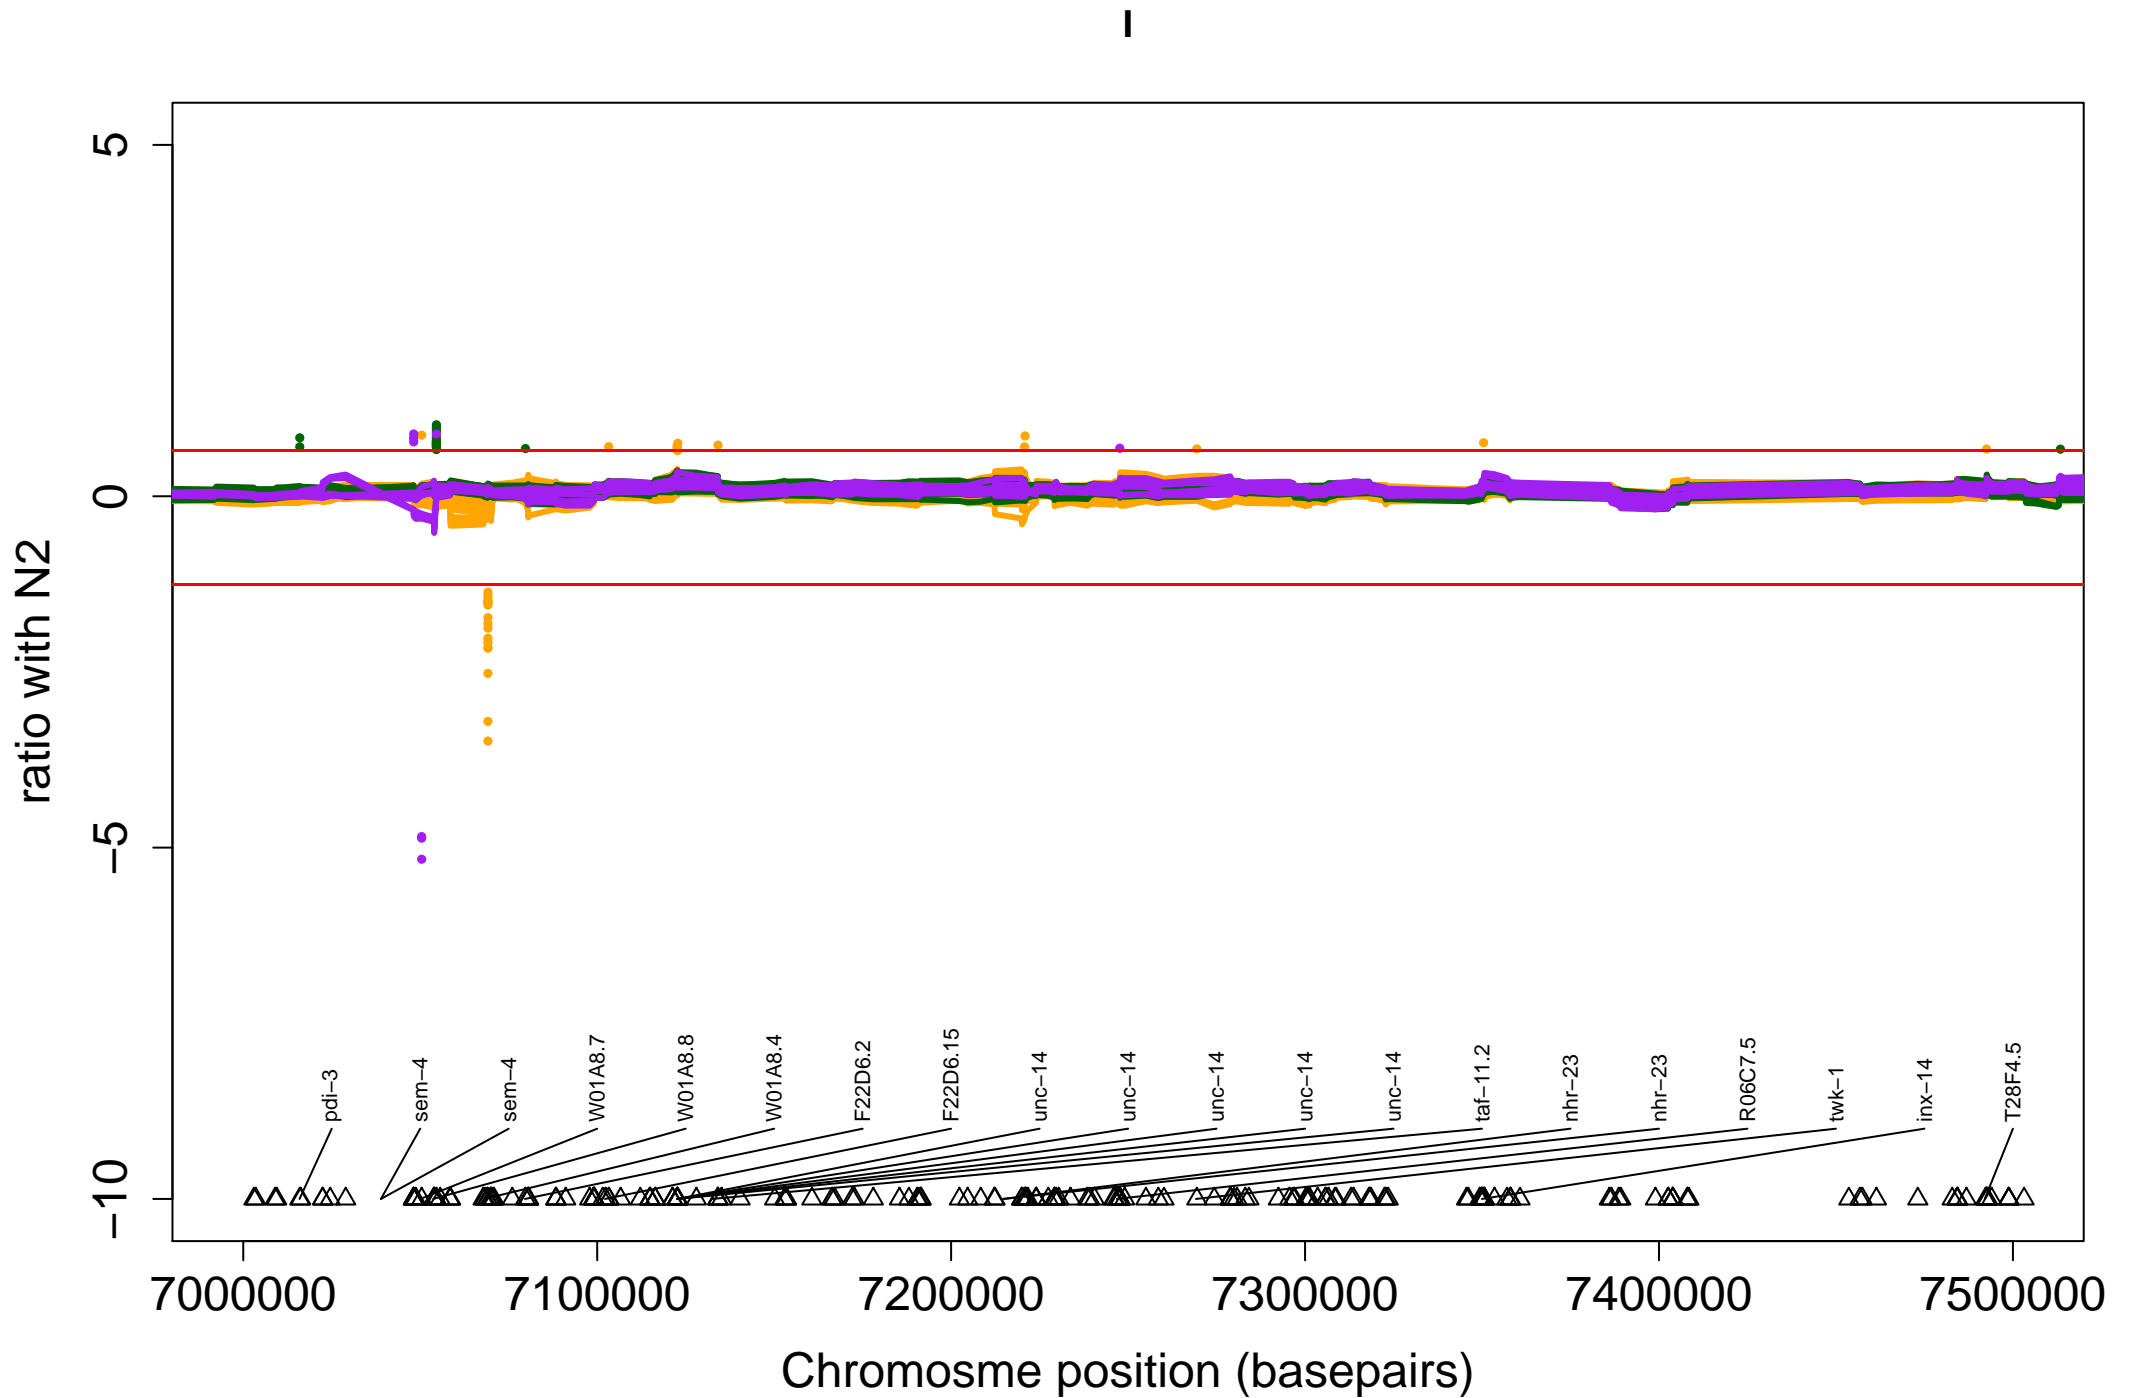

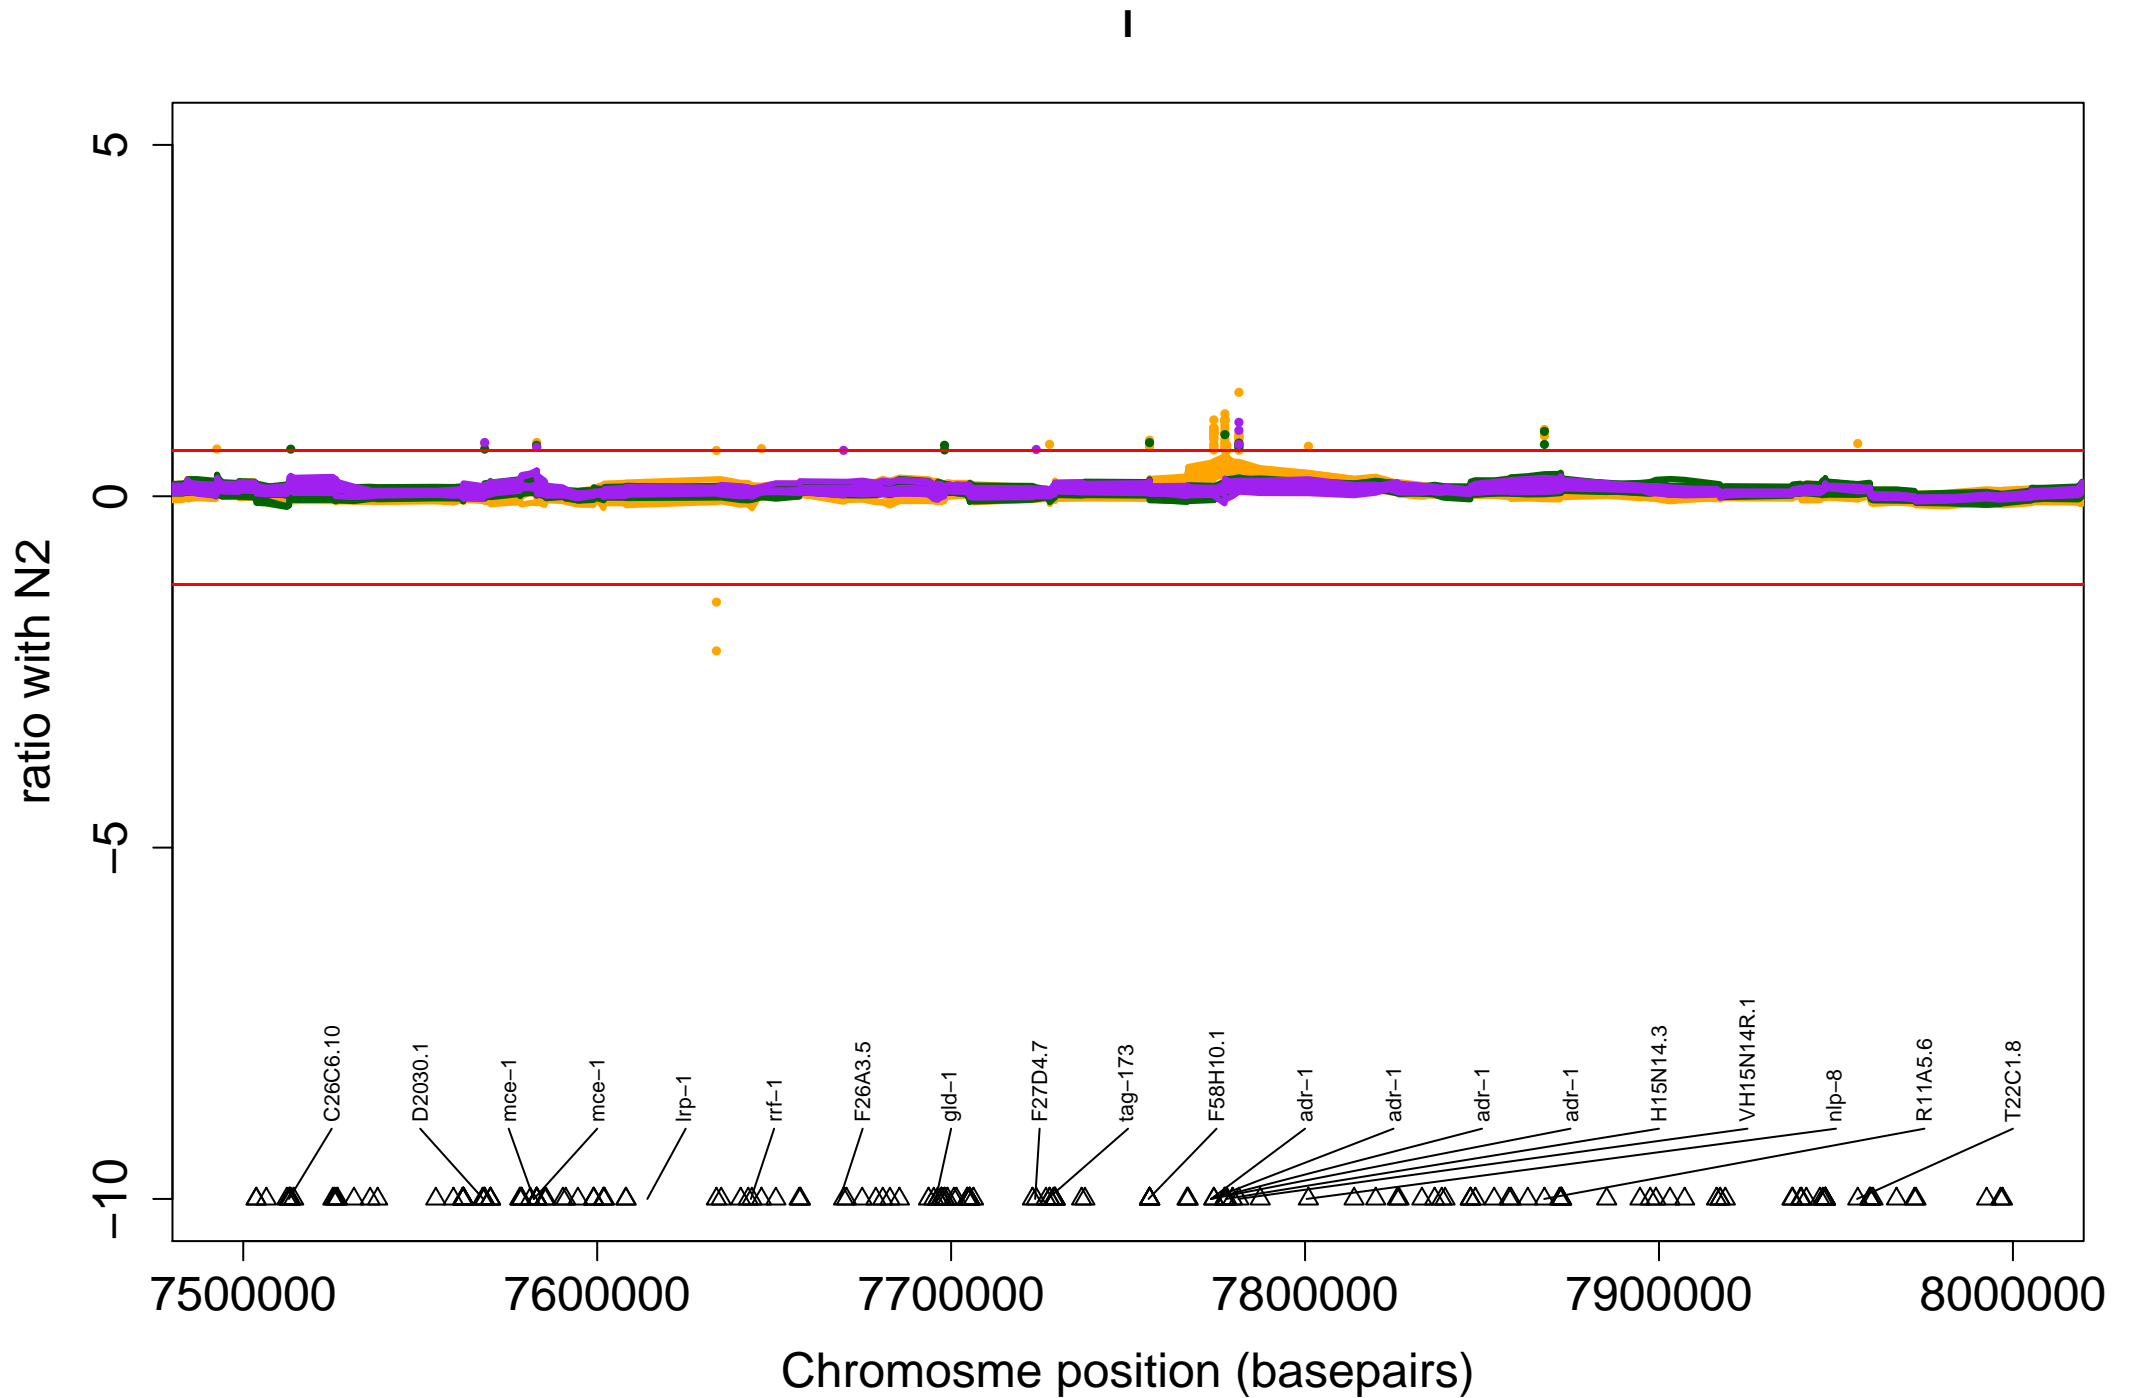



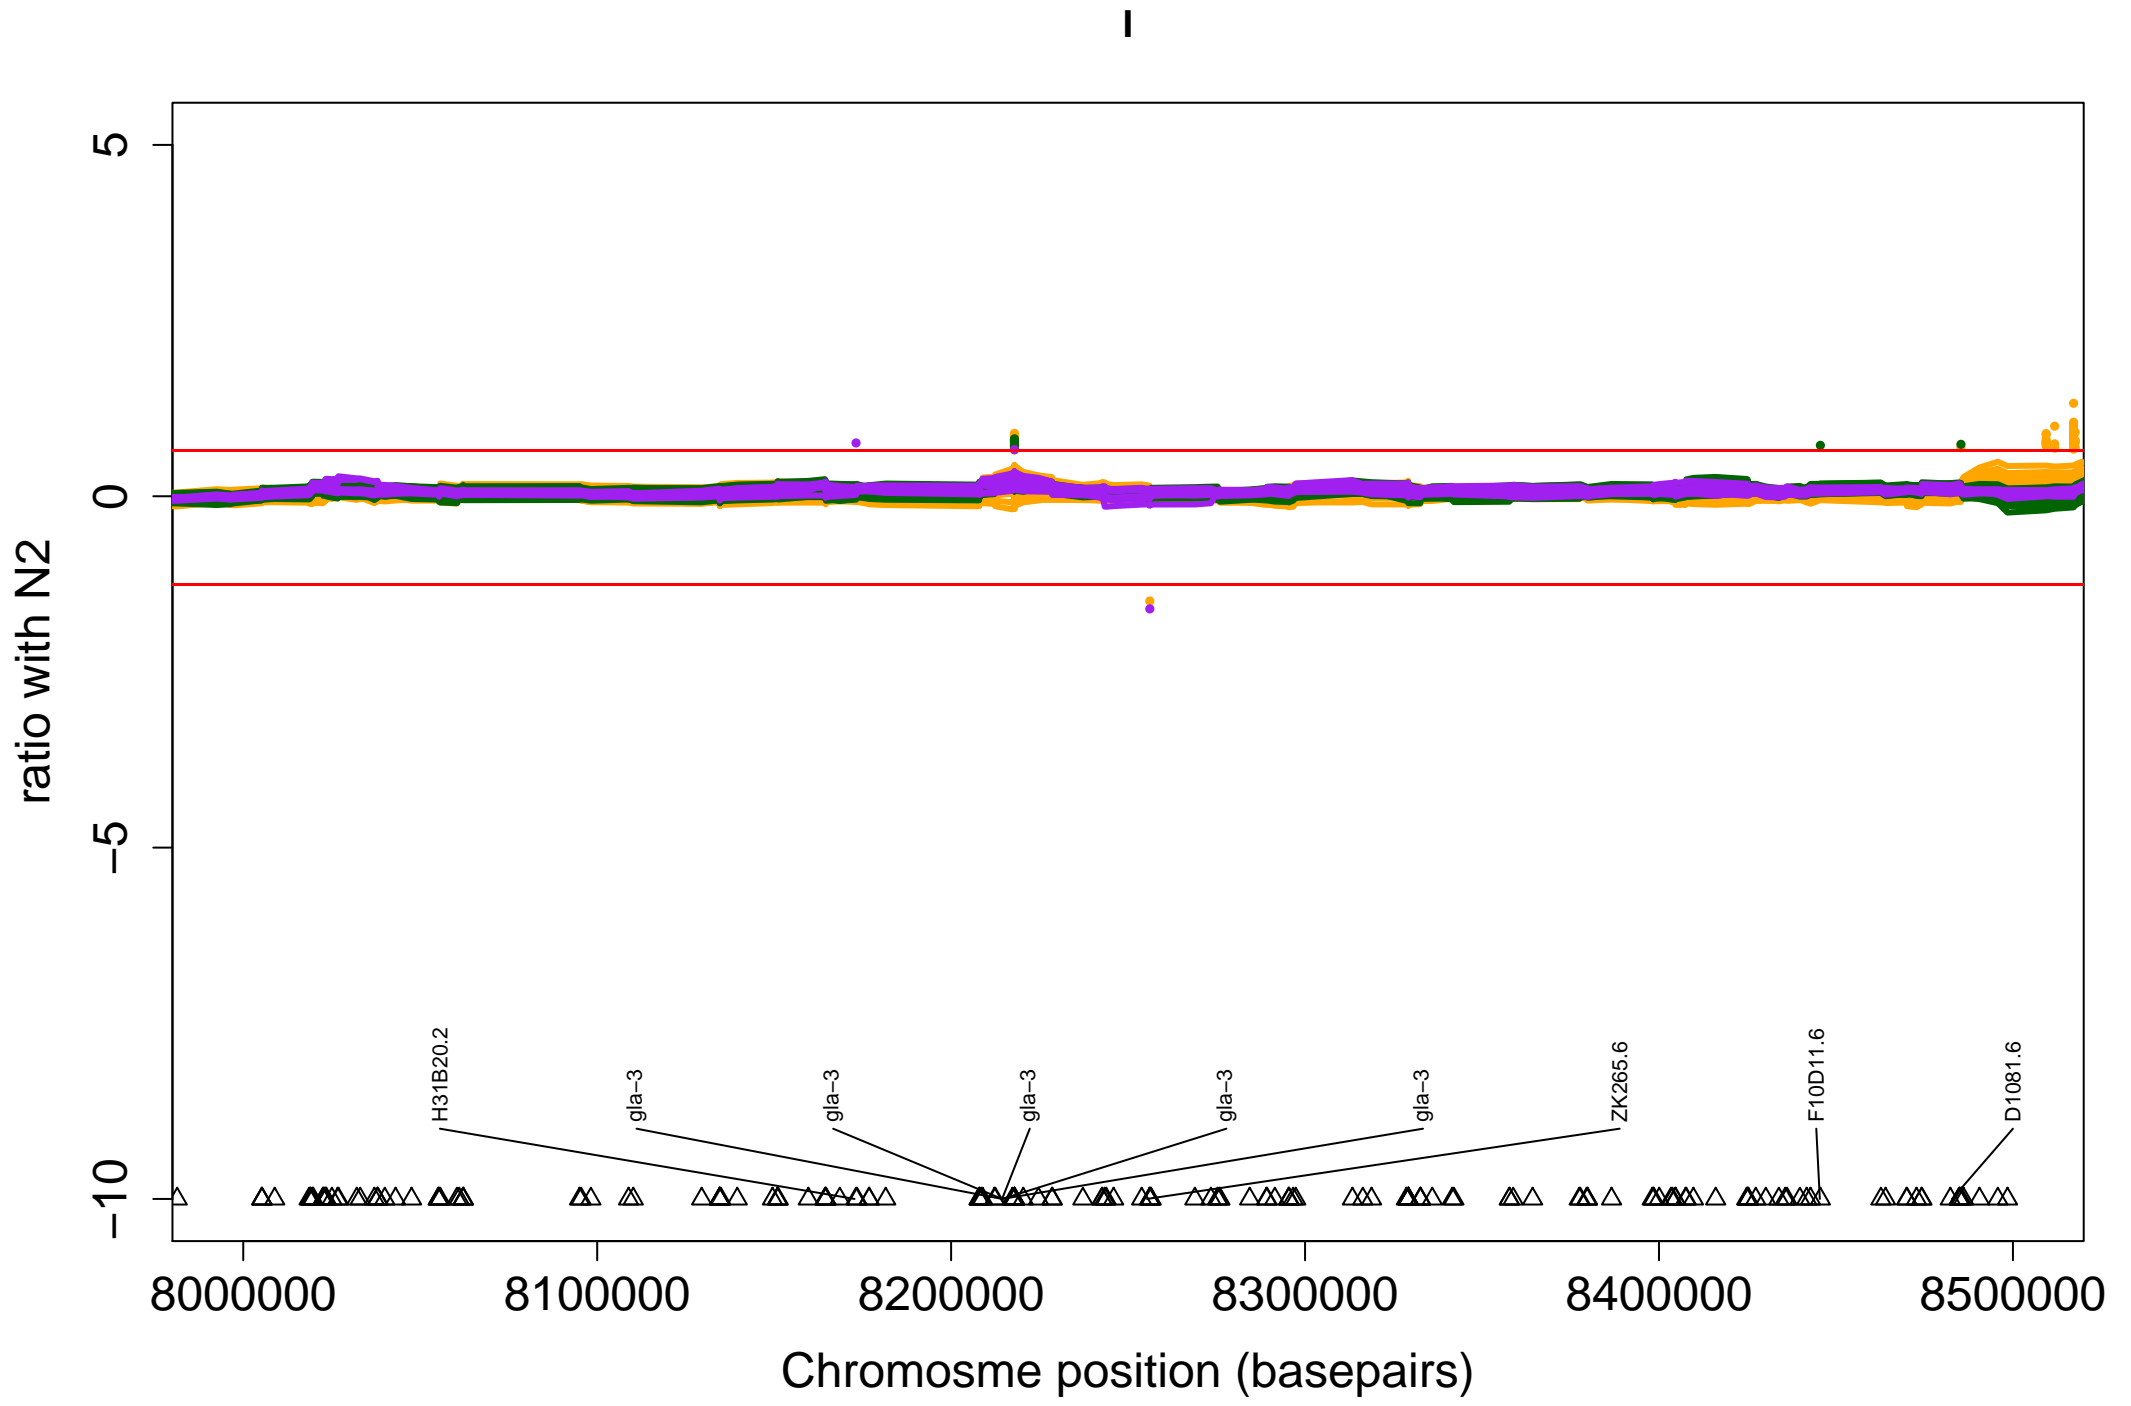

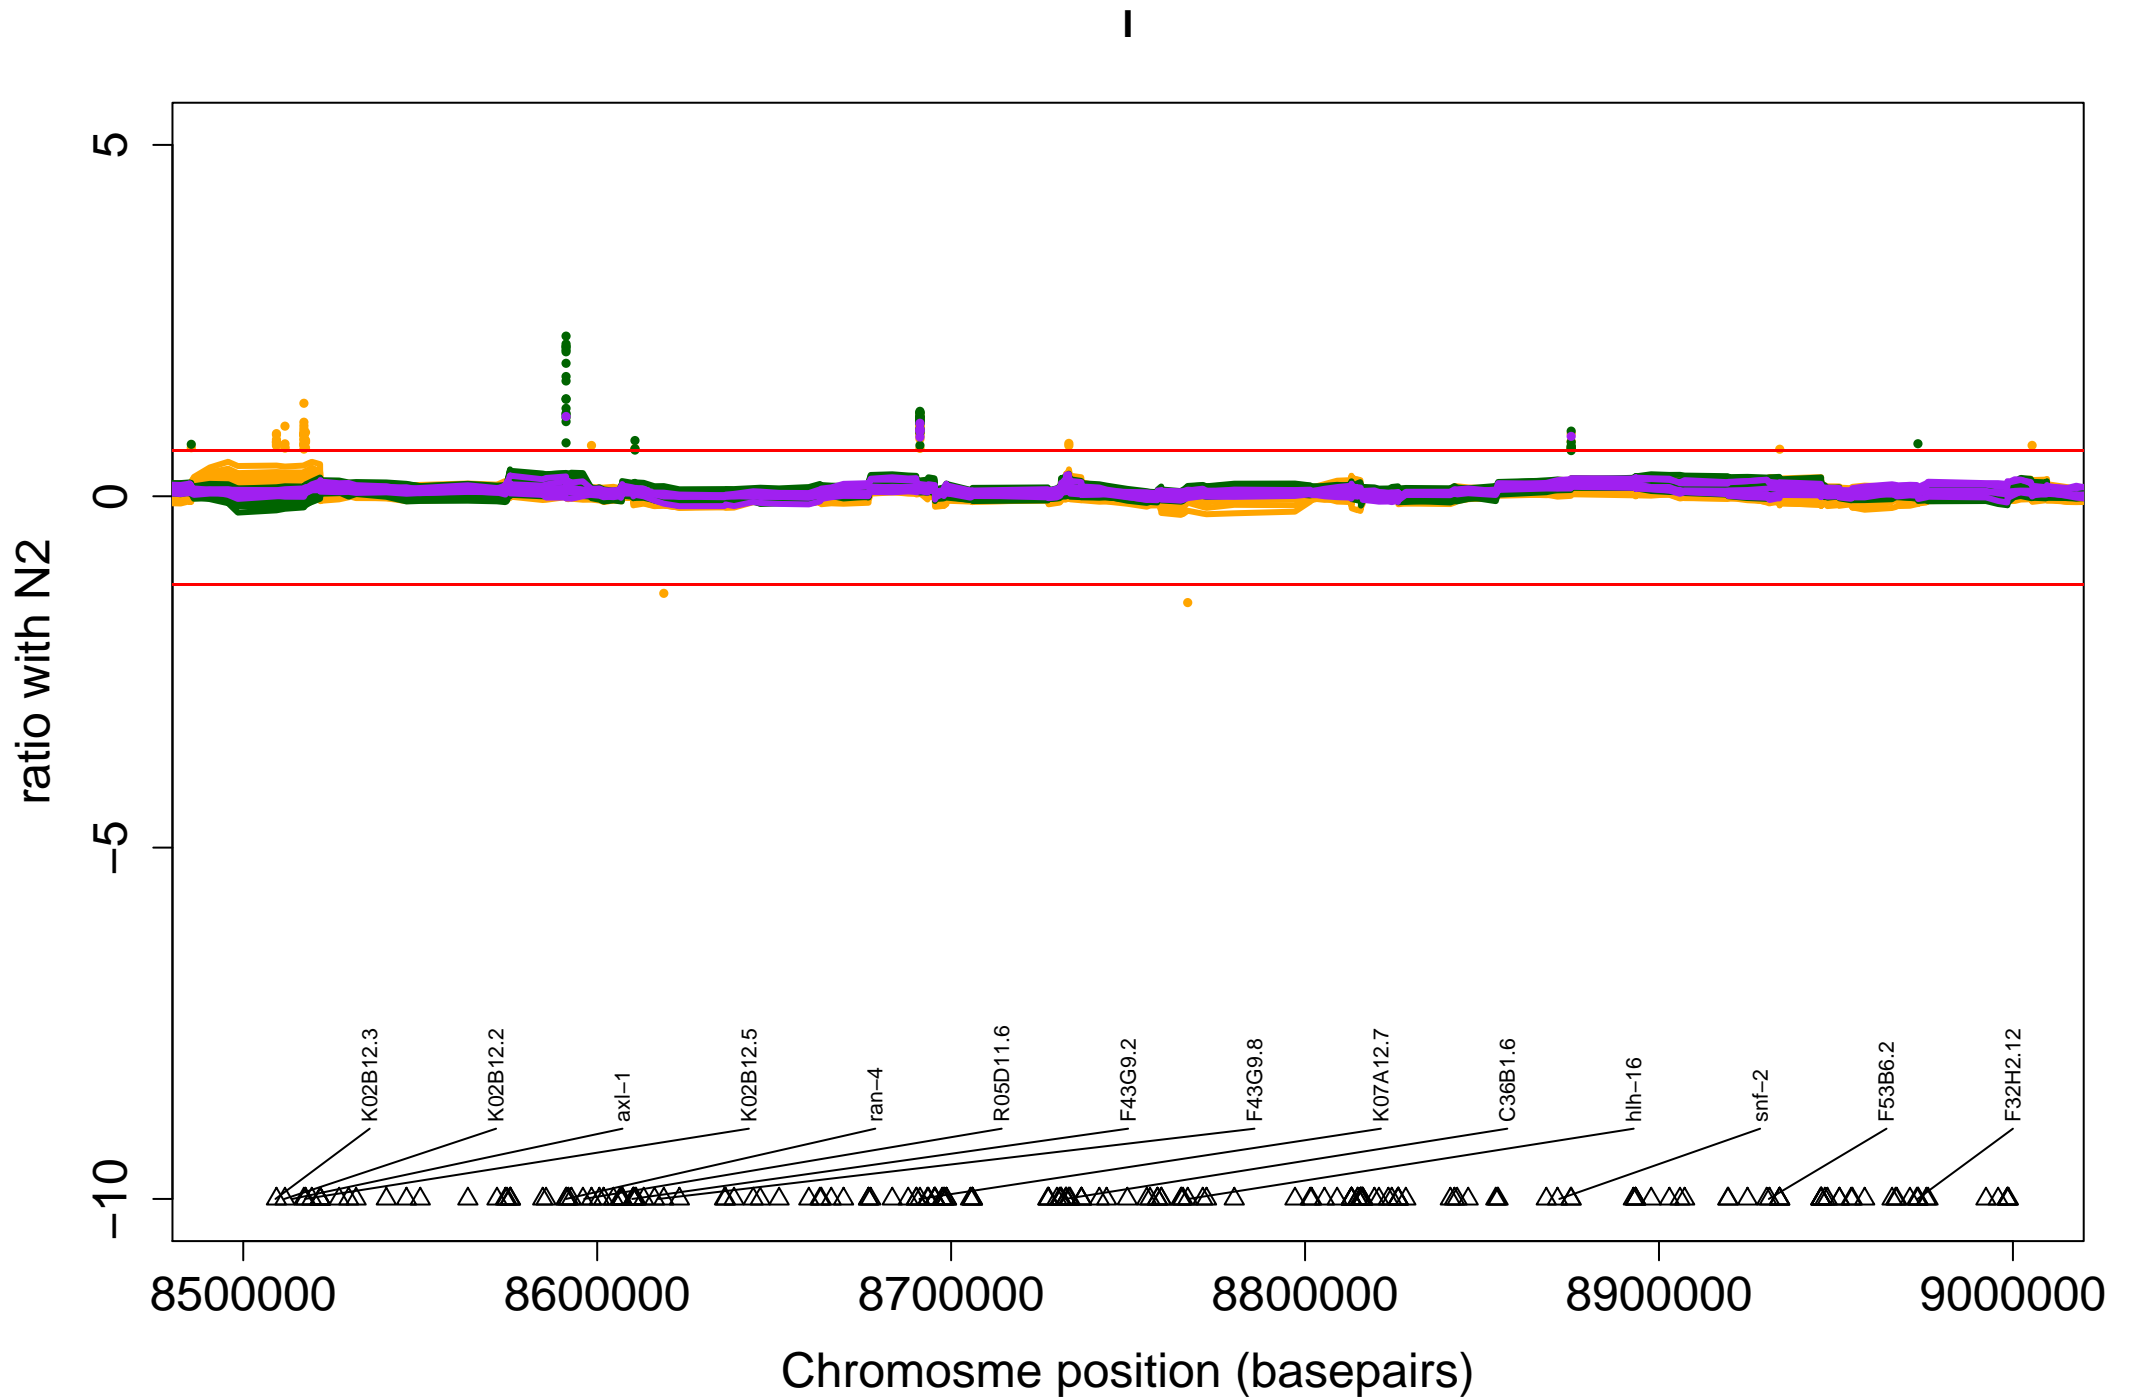

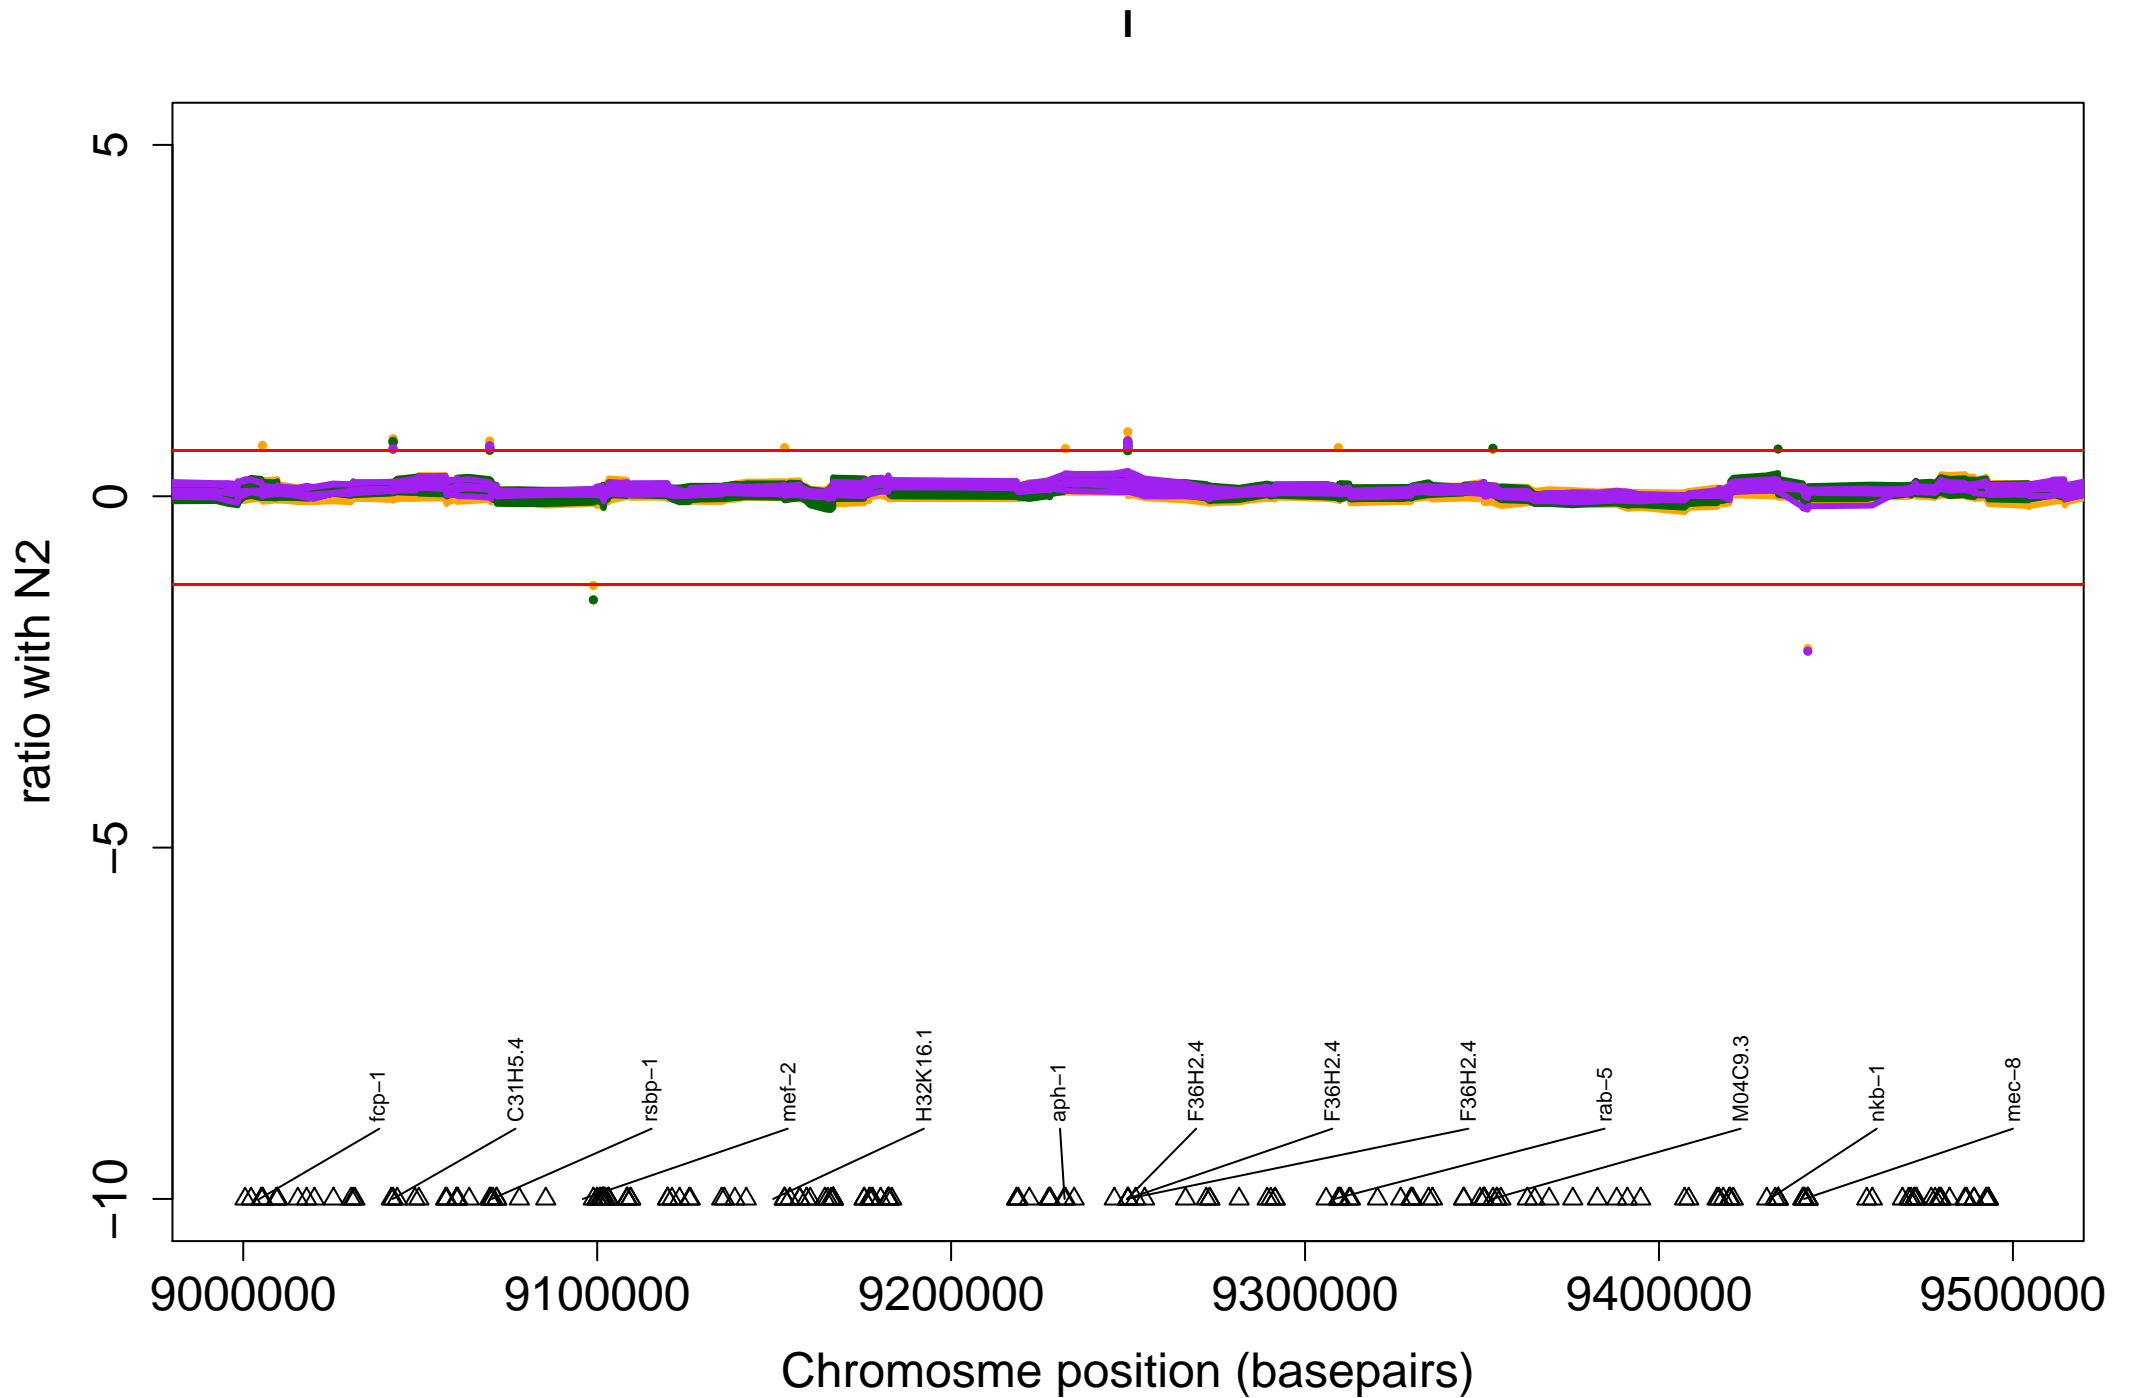

I

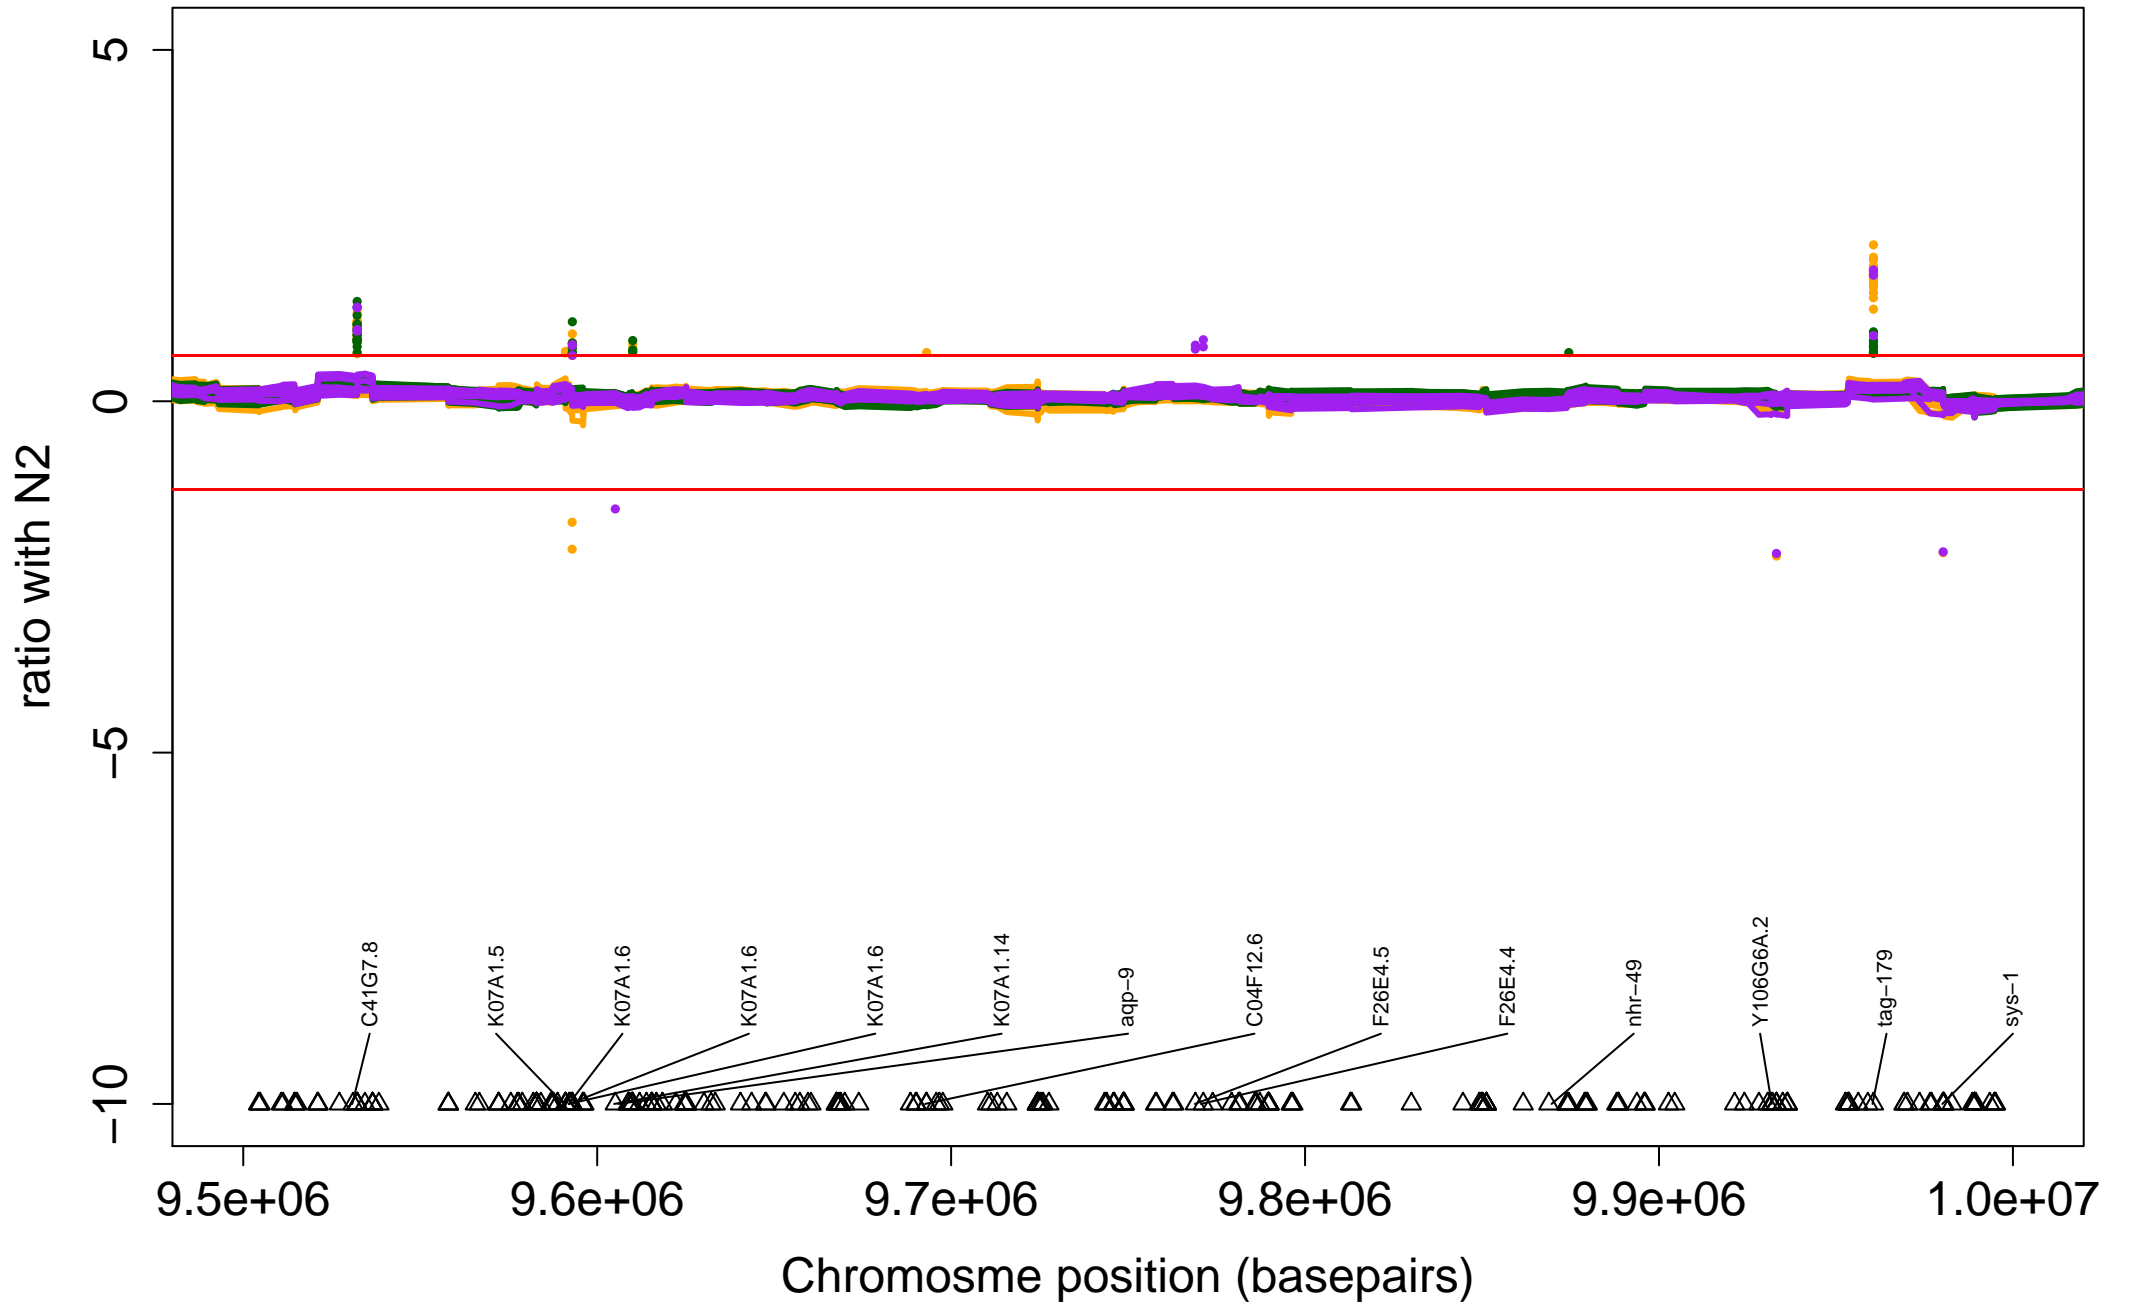

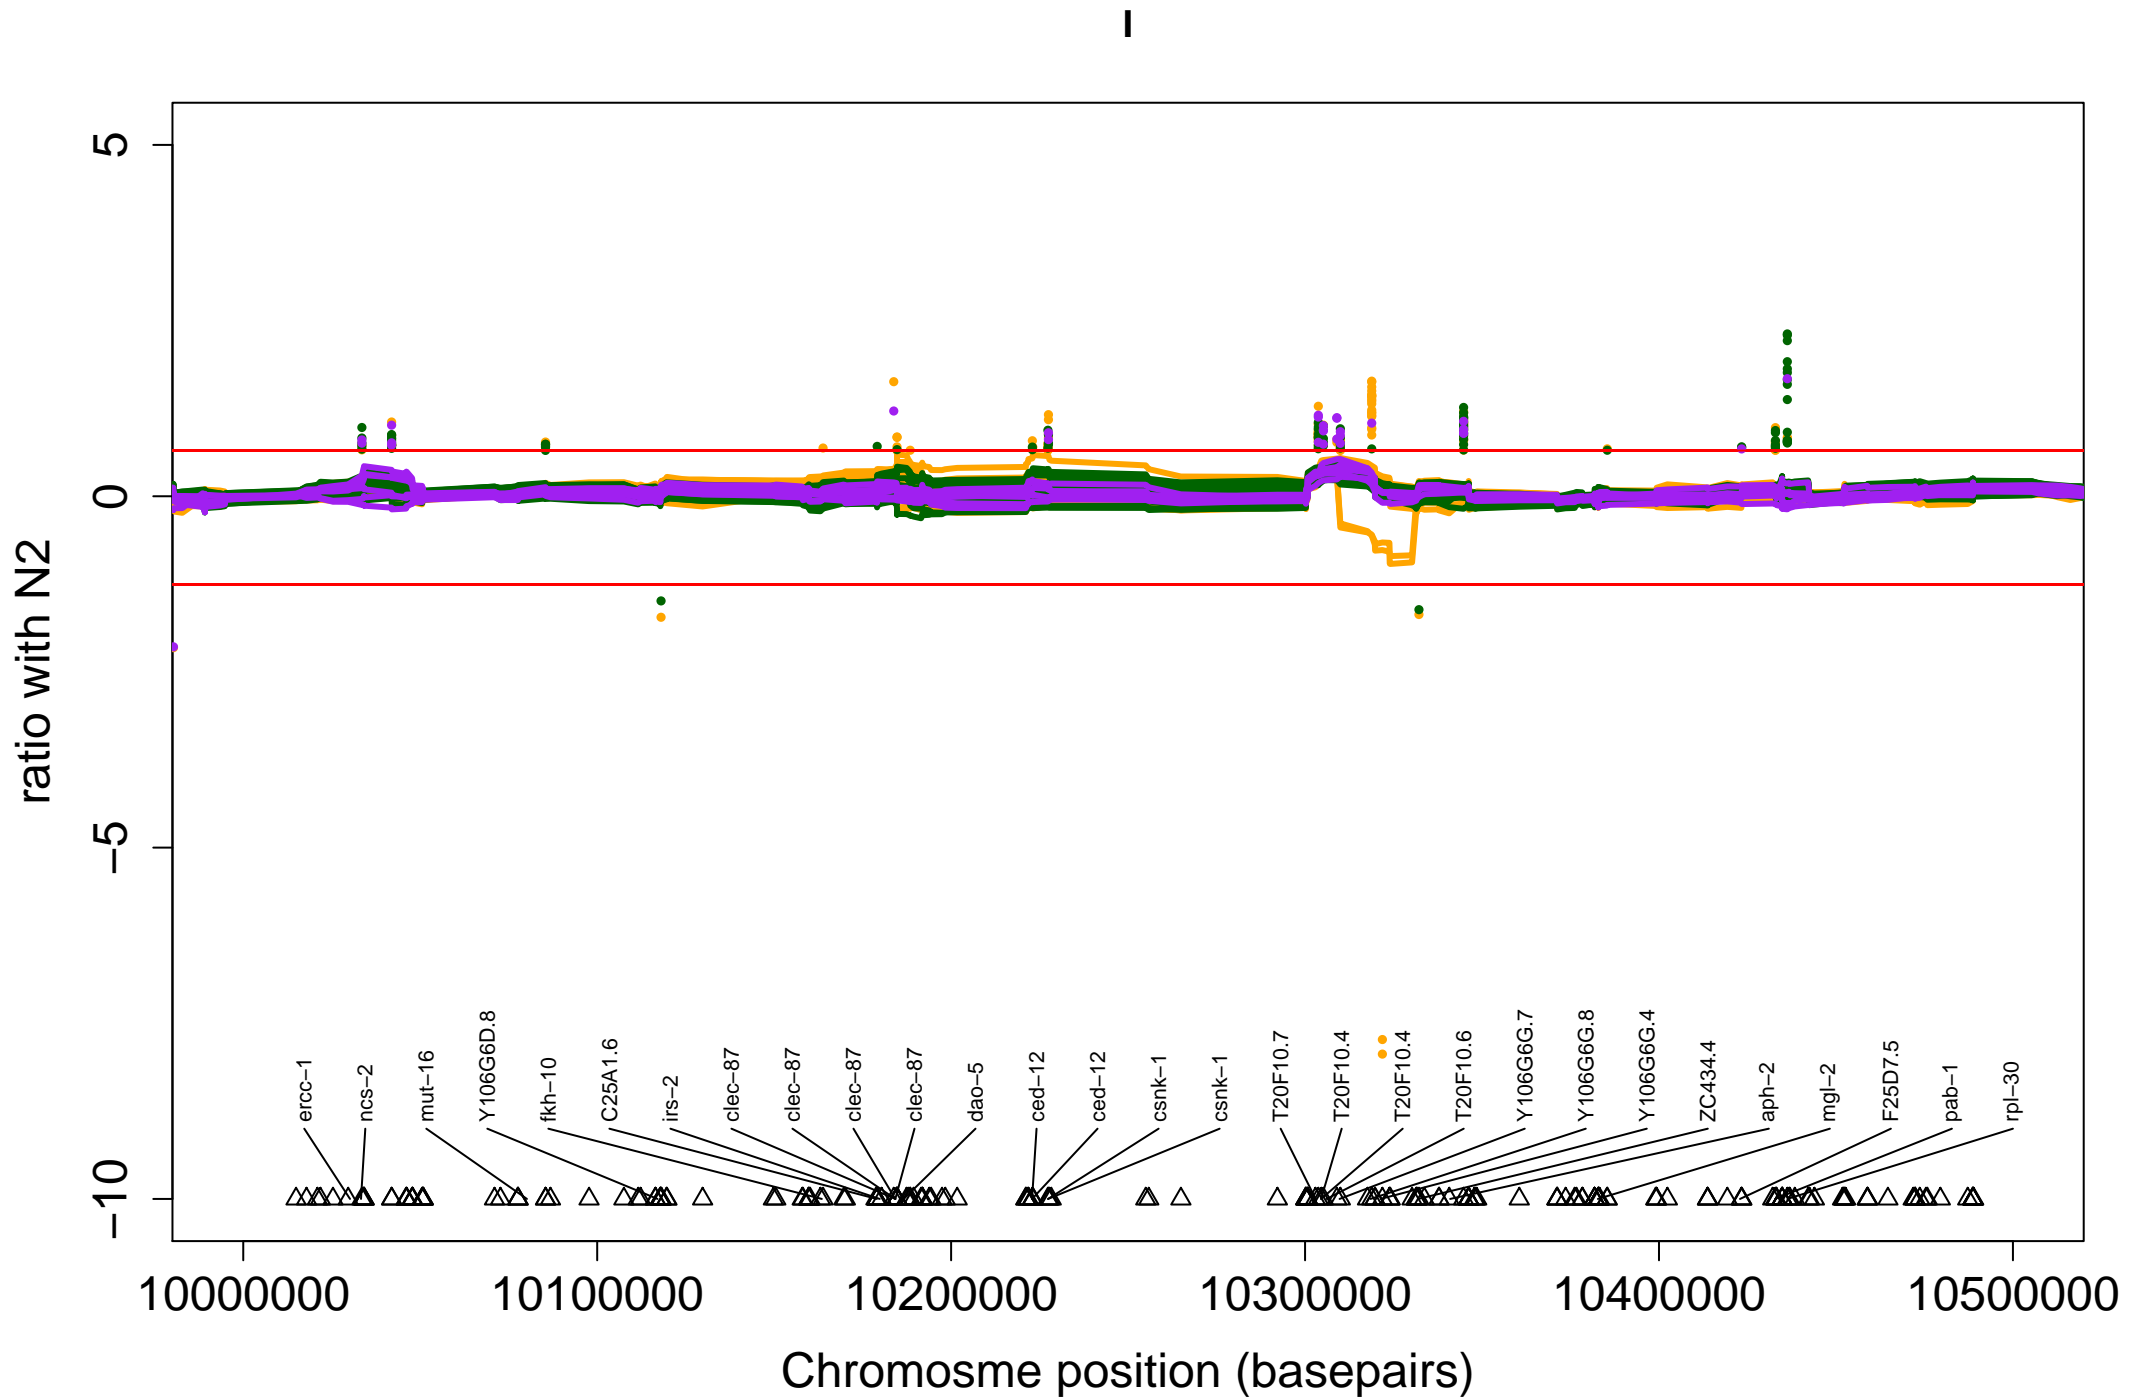

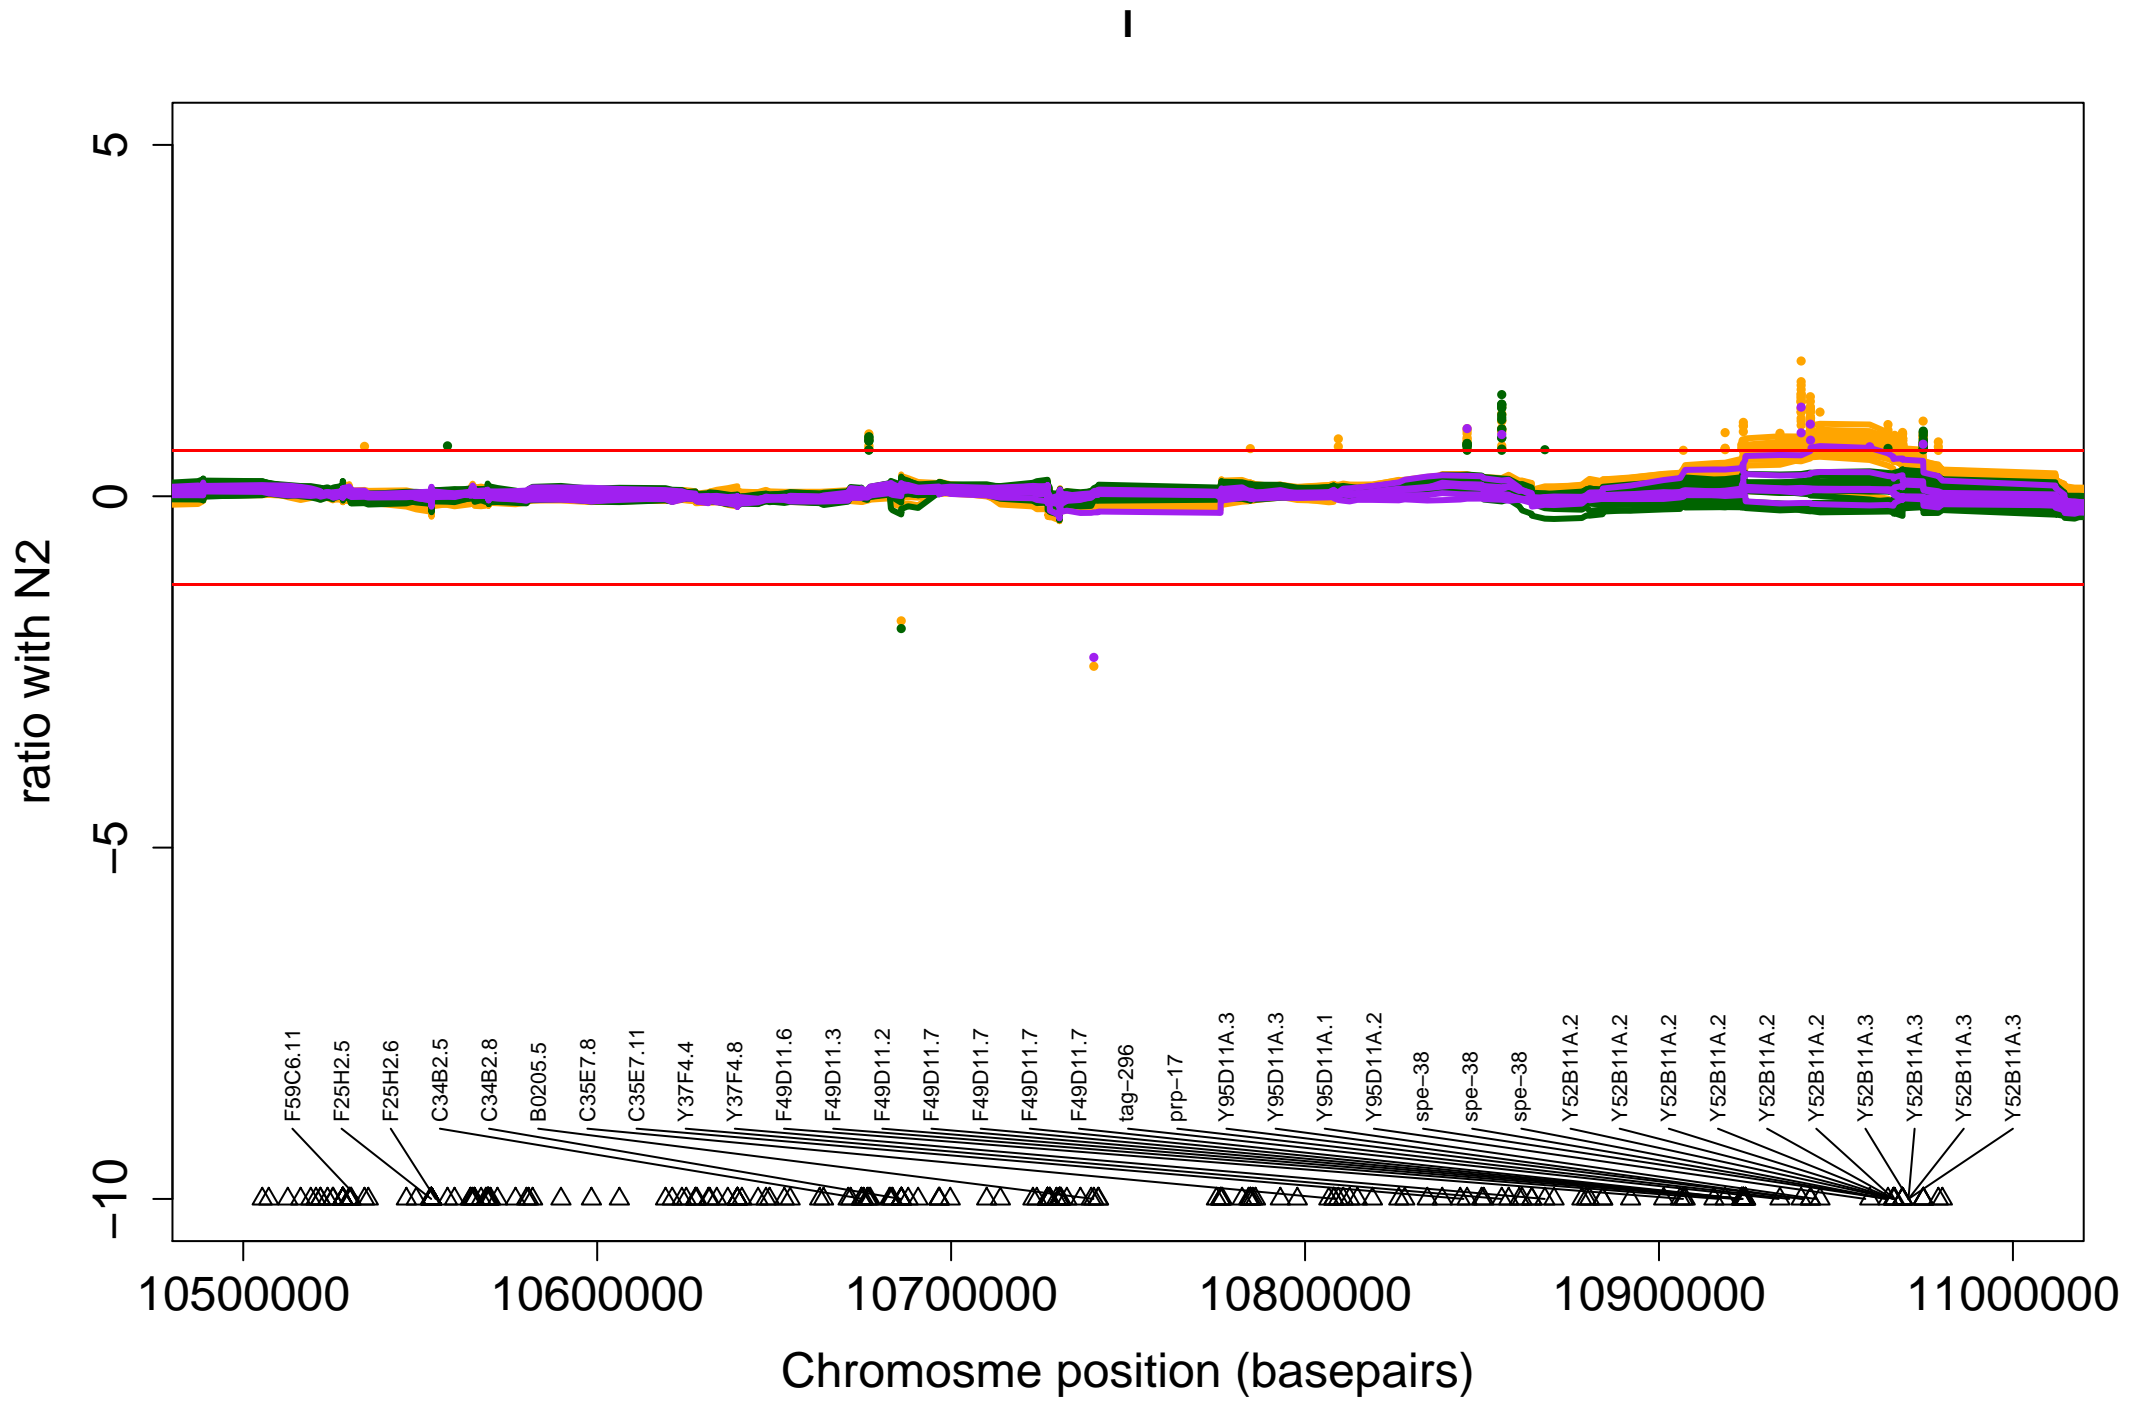

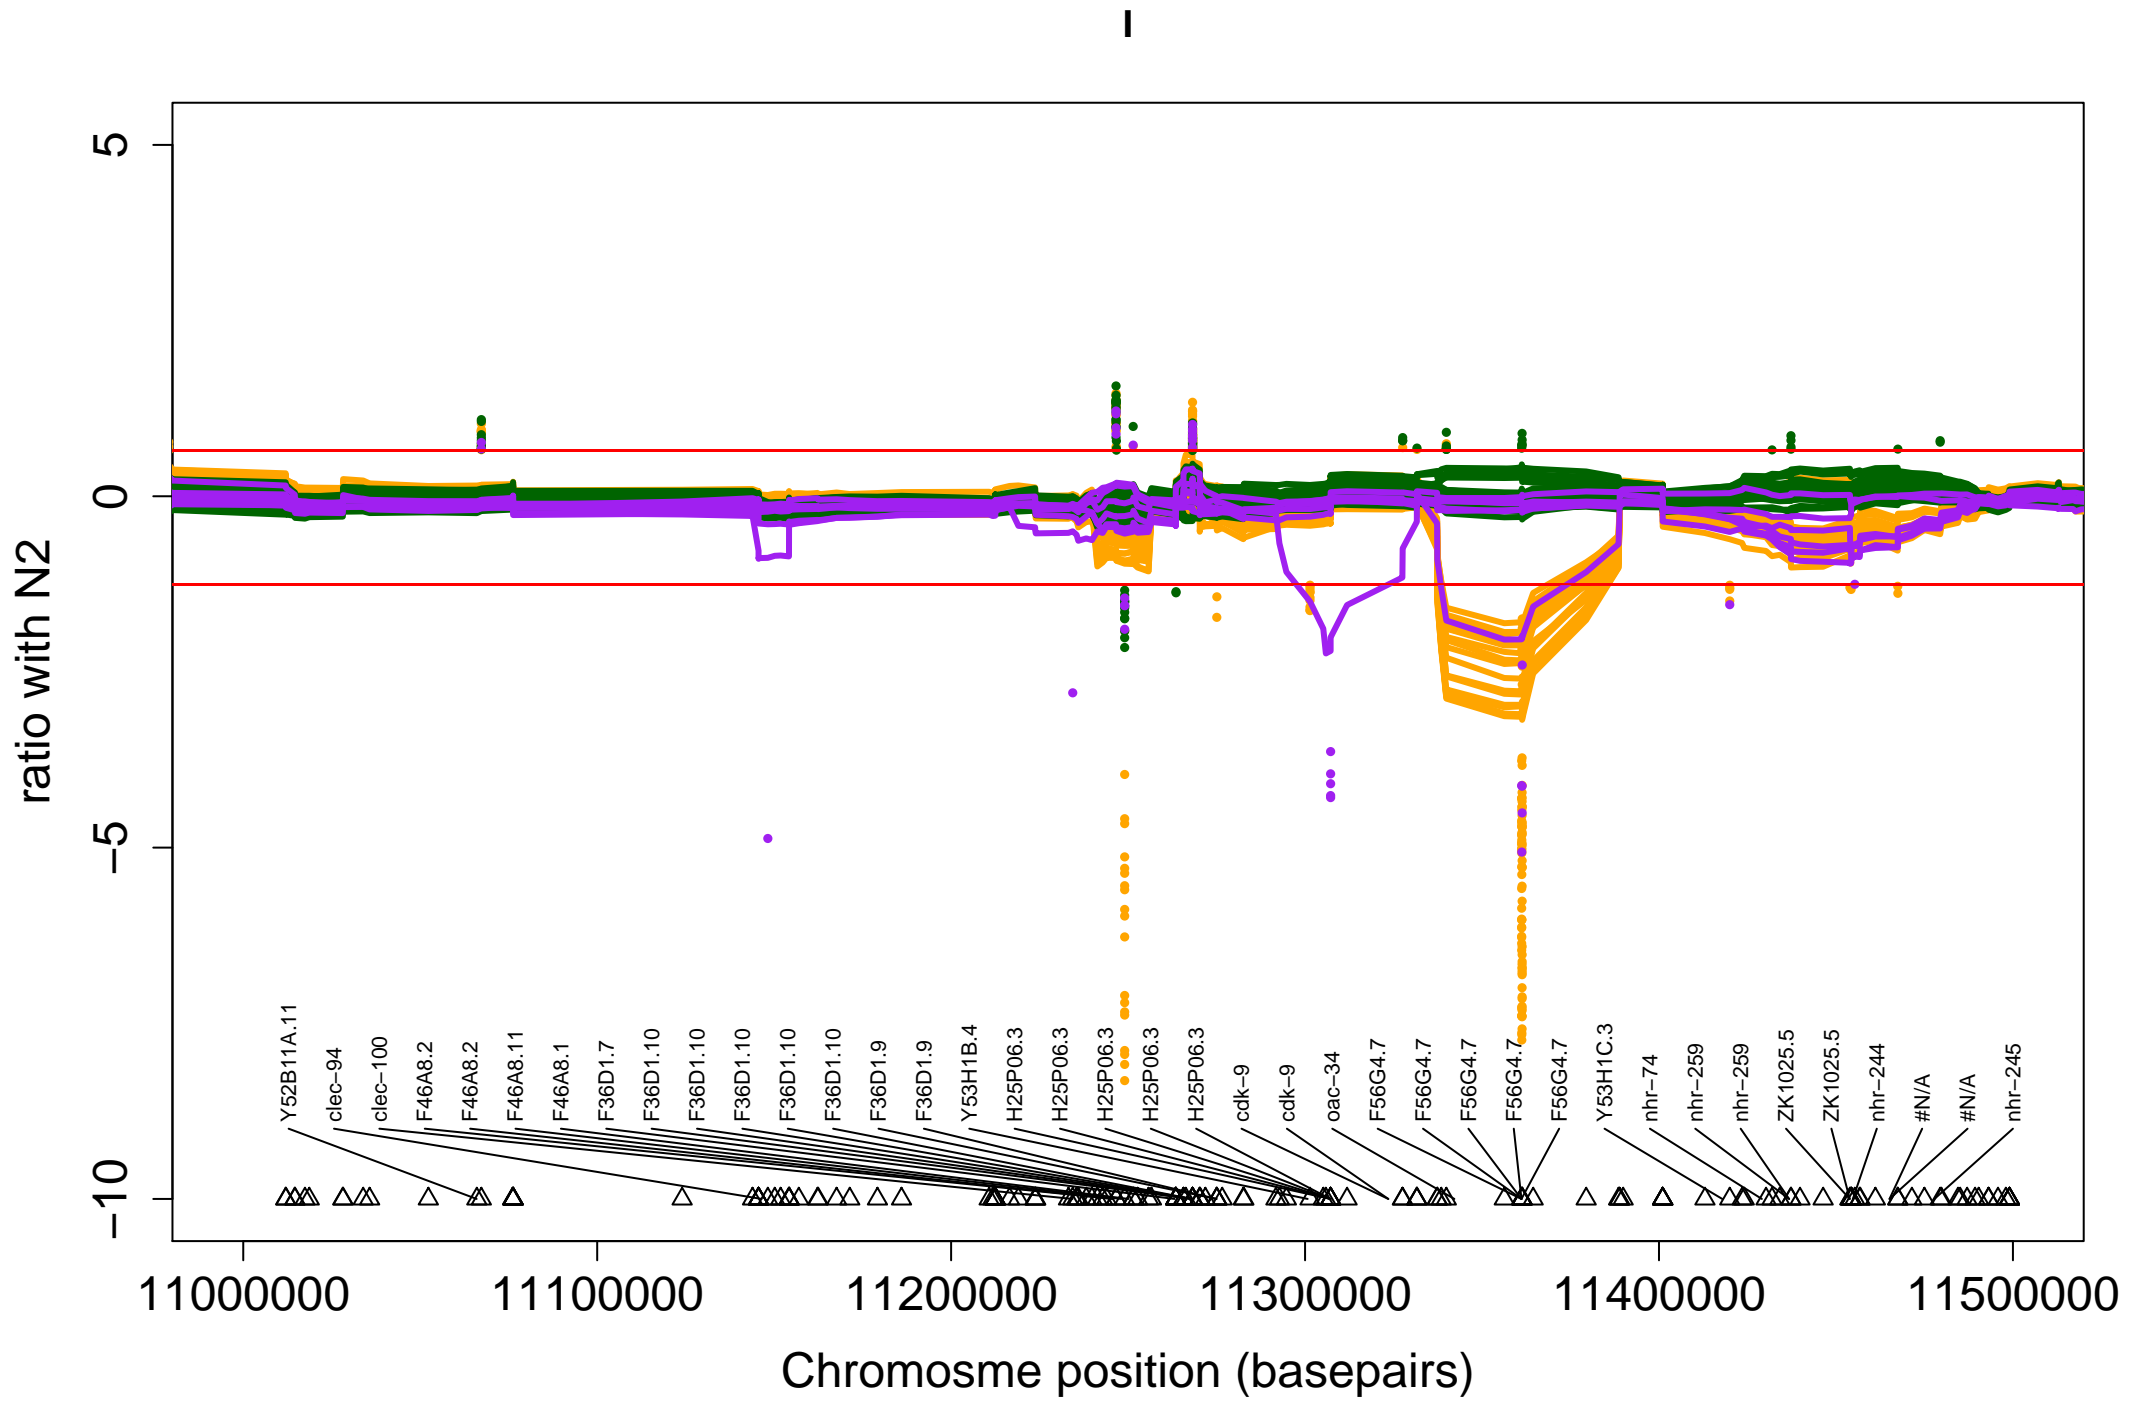

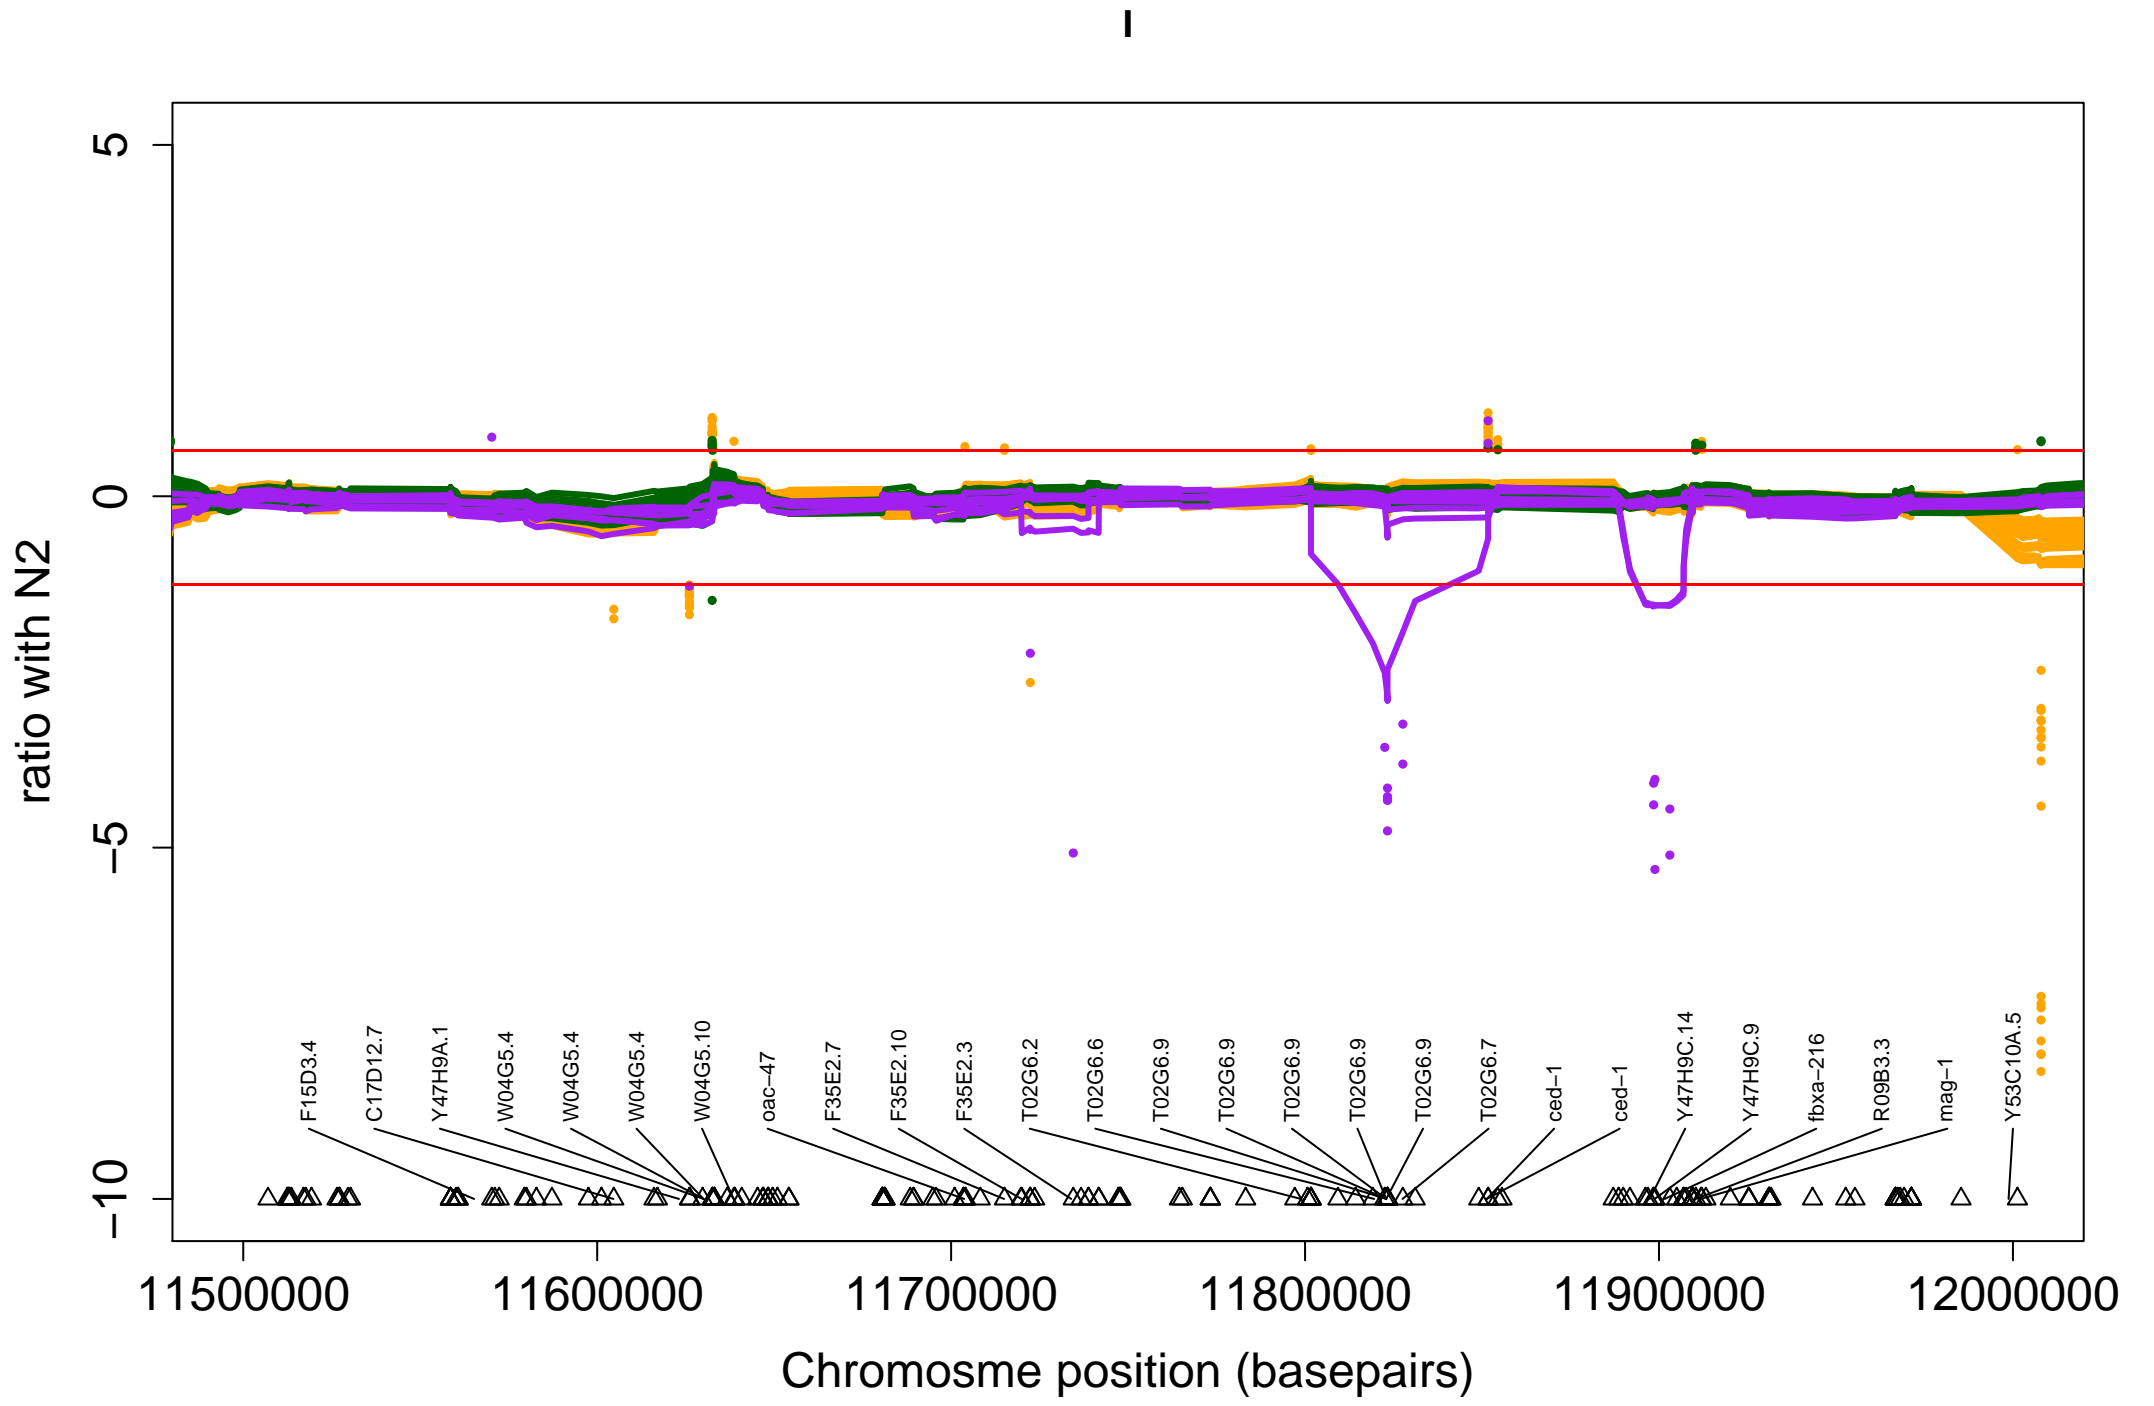



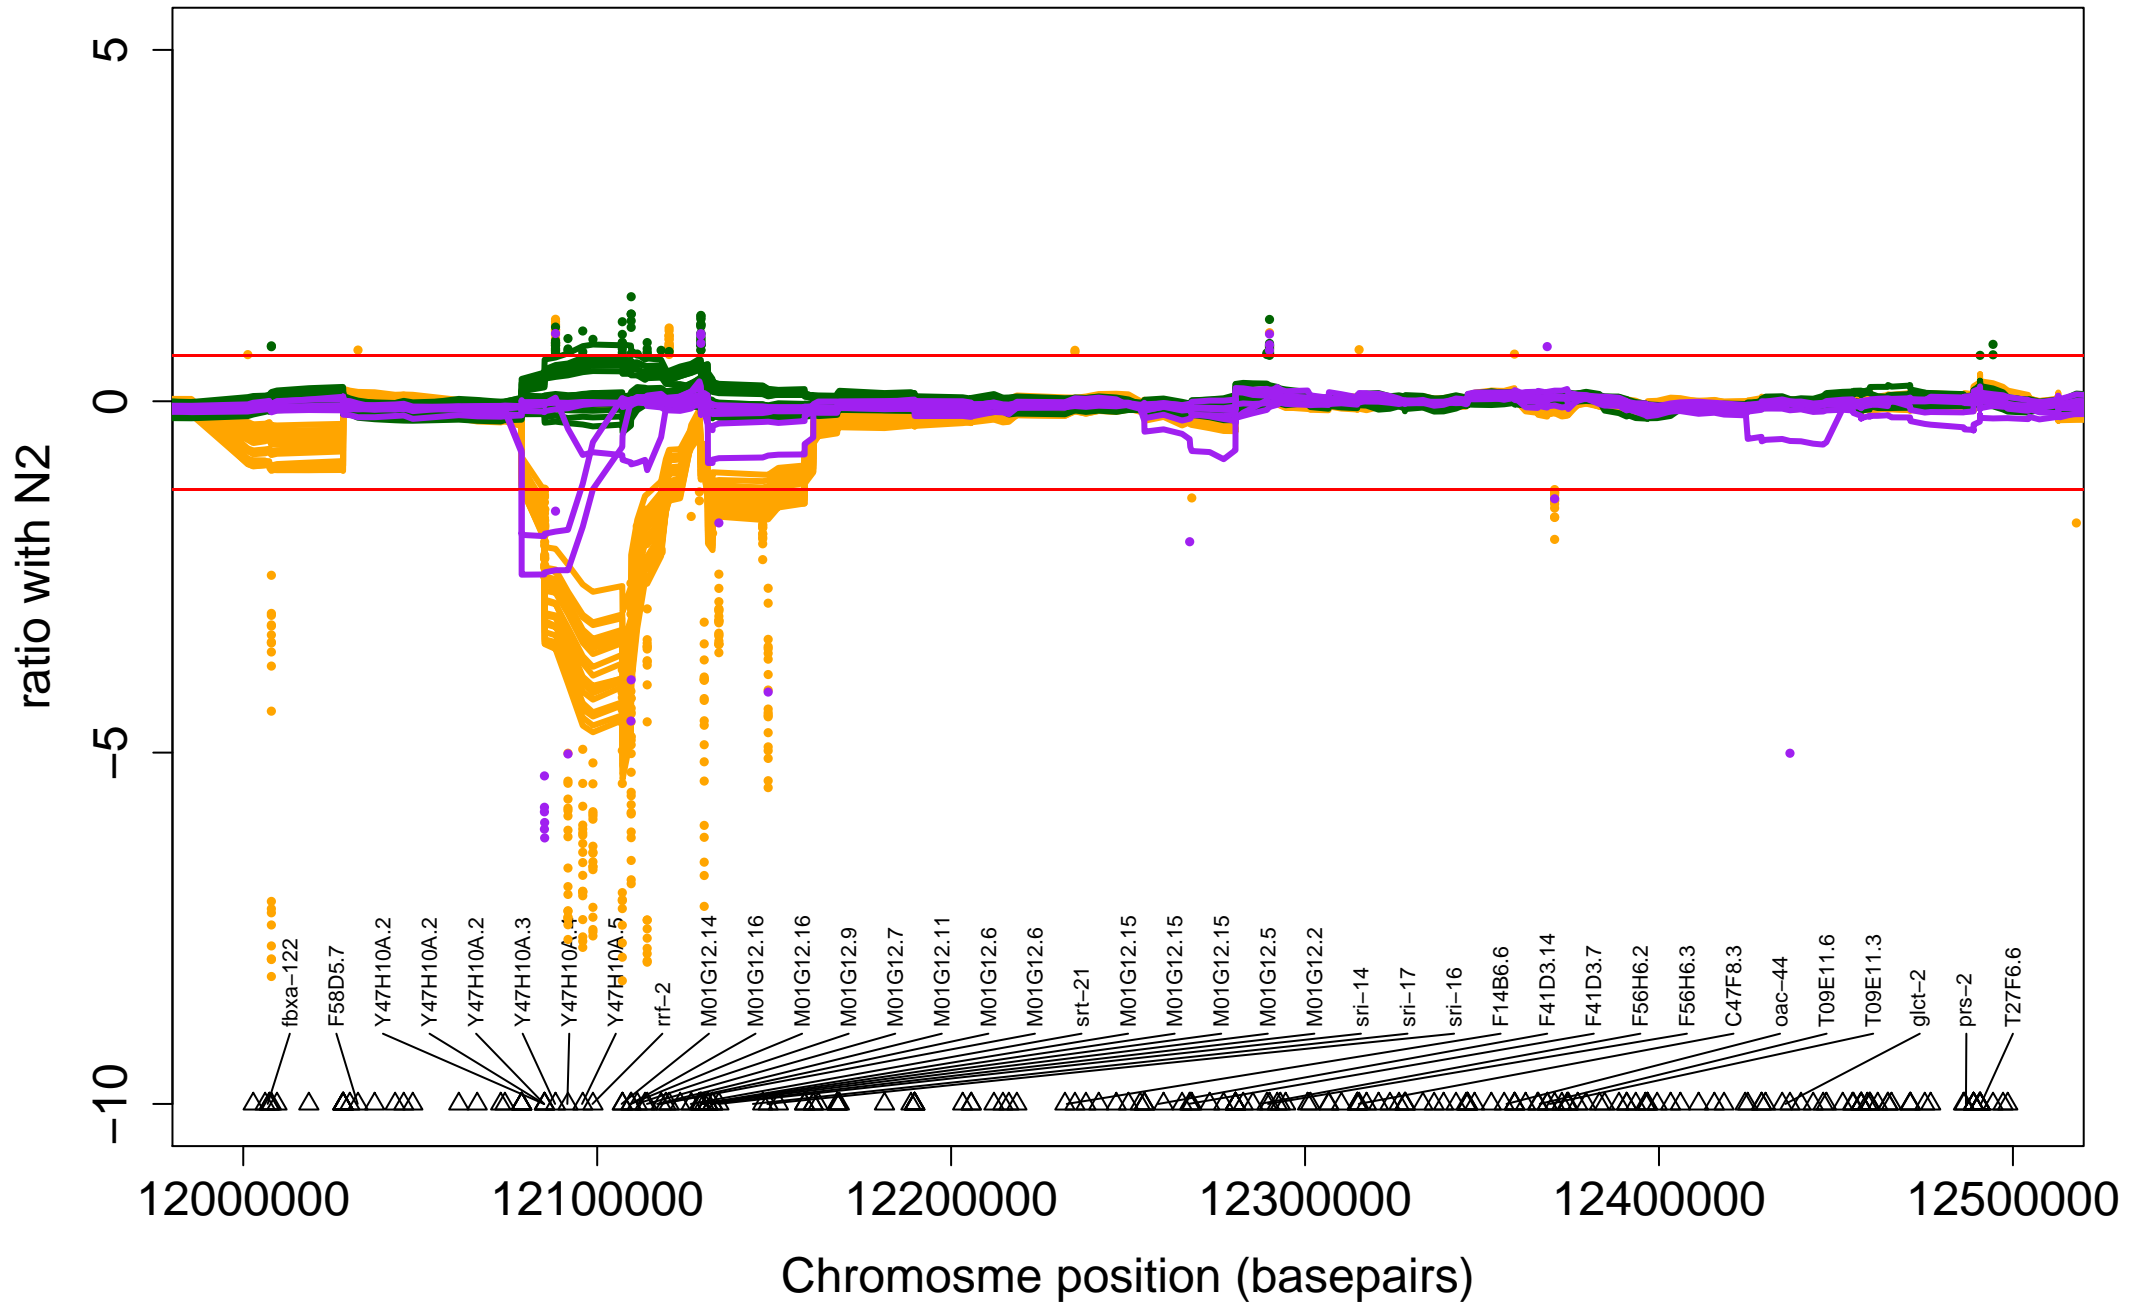

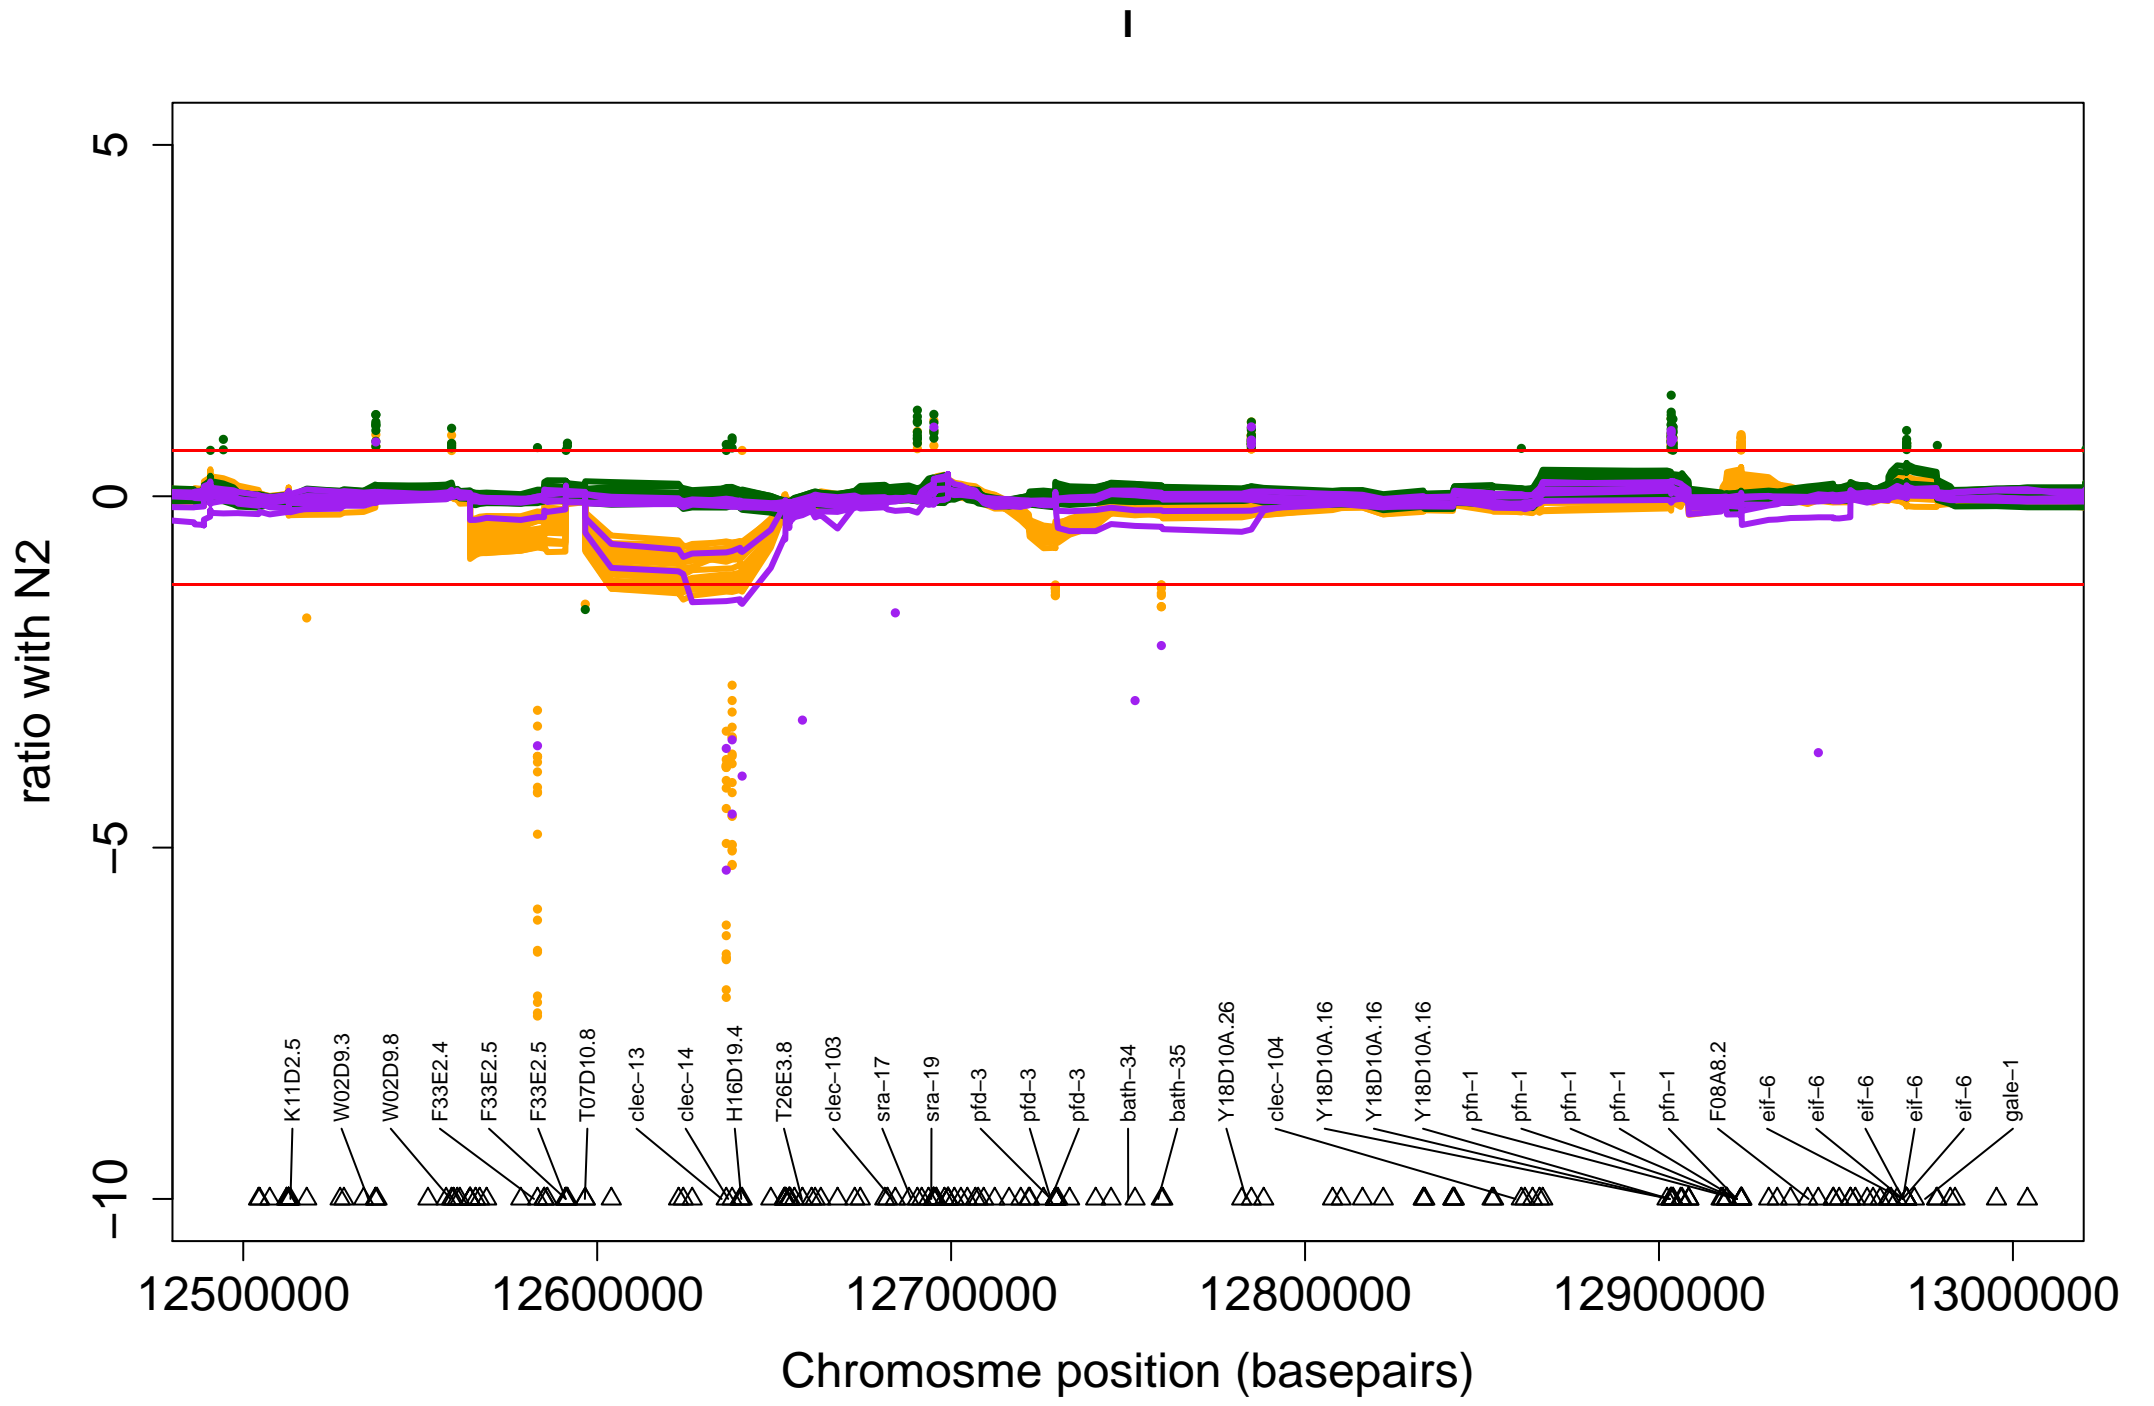

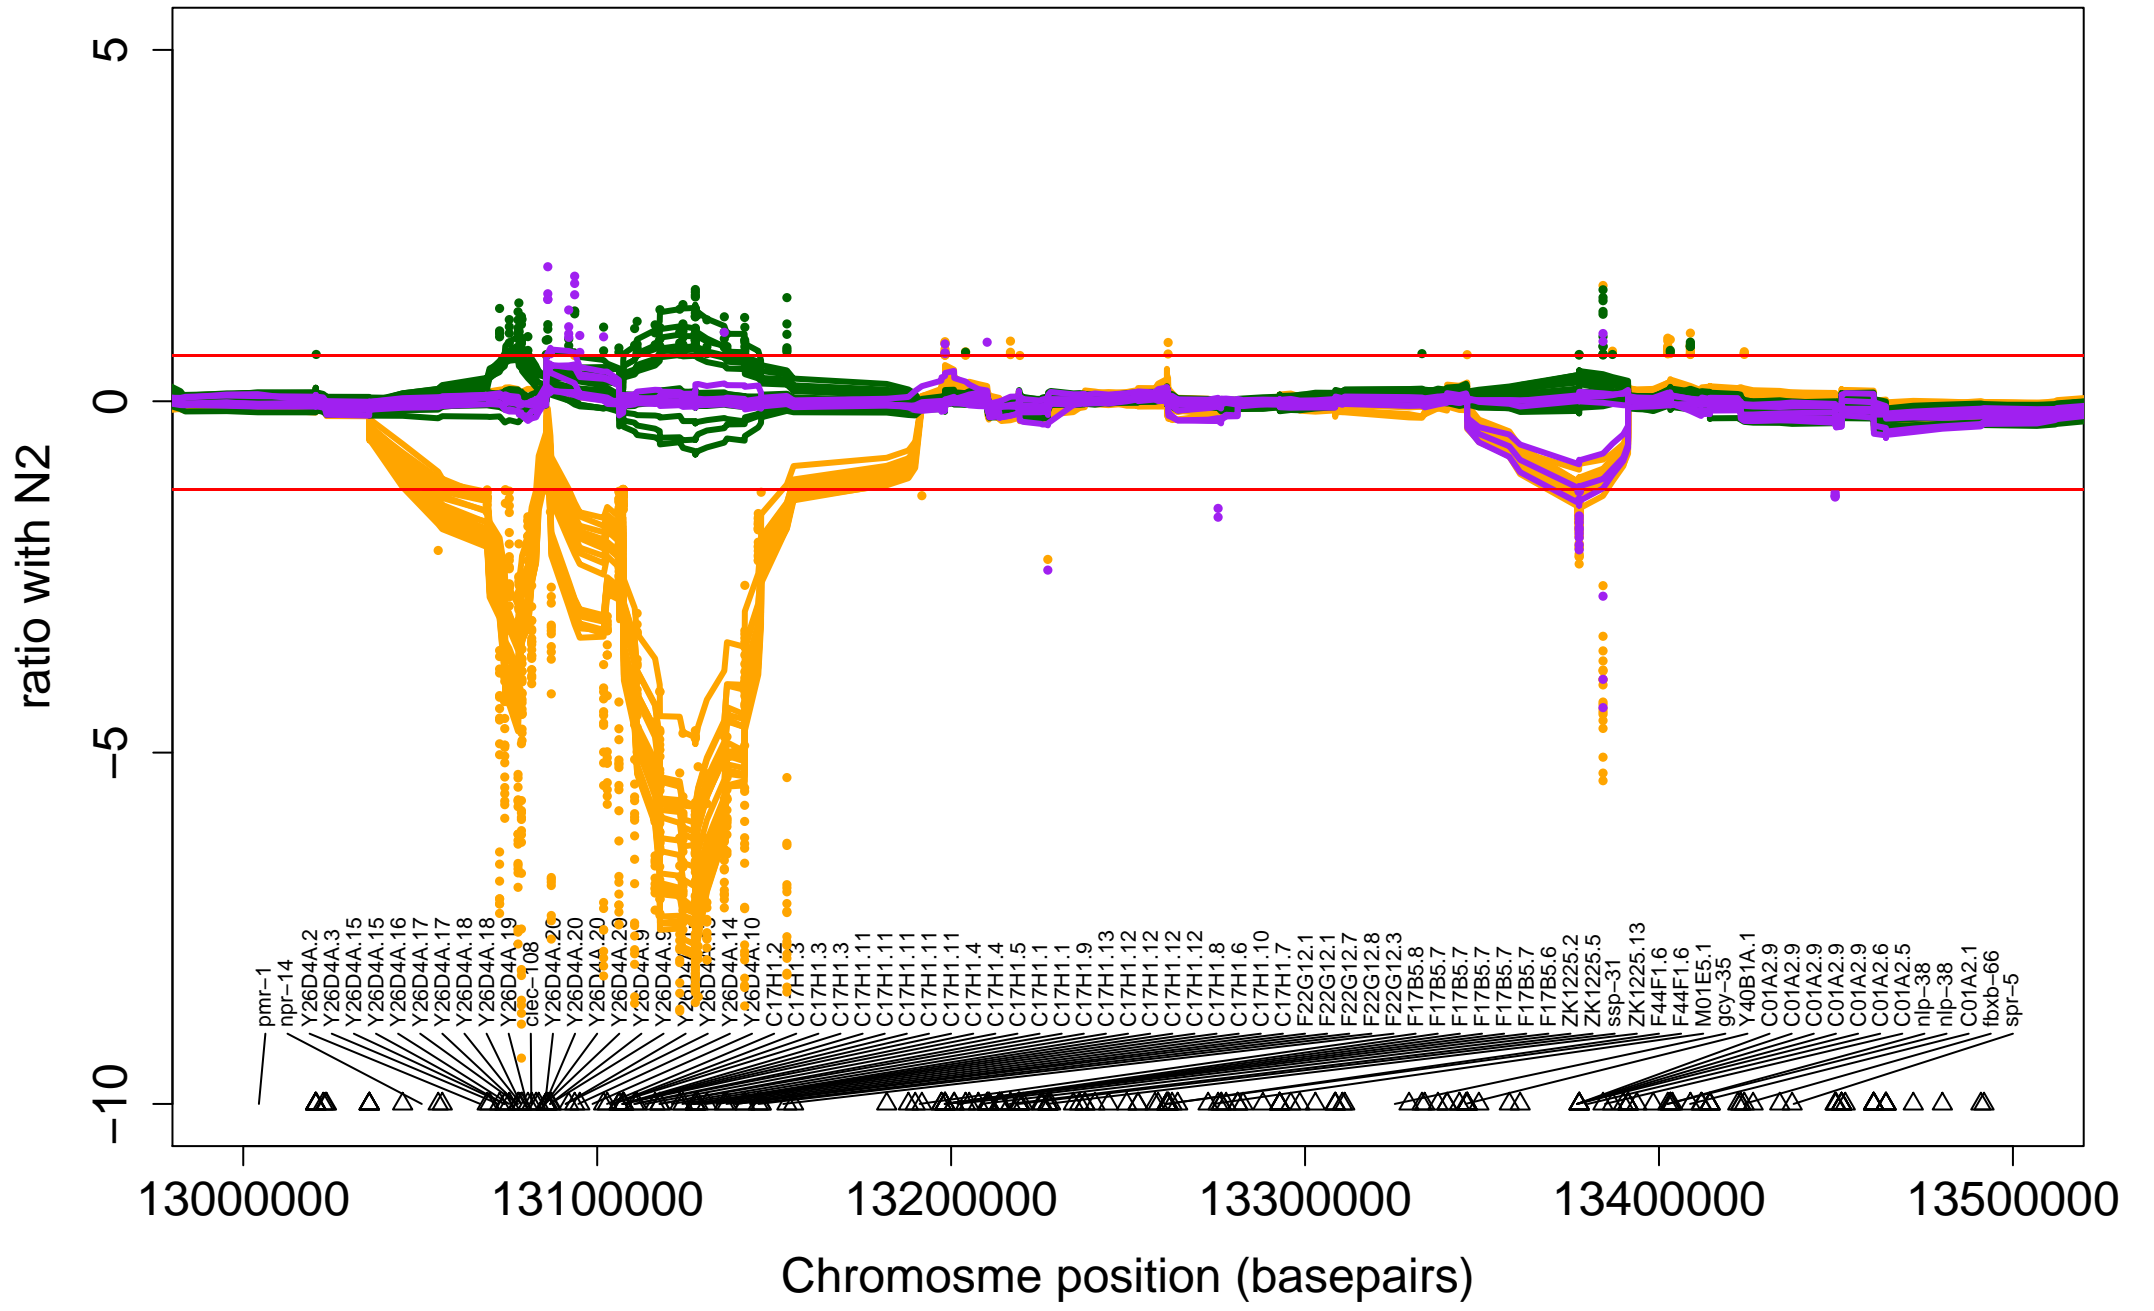

I

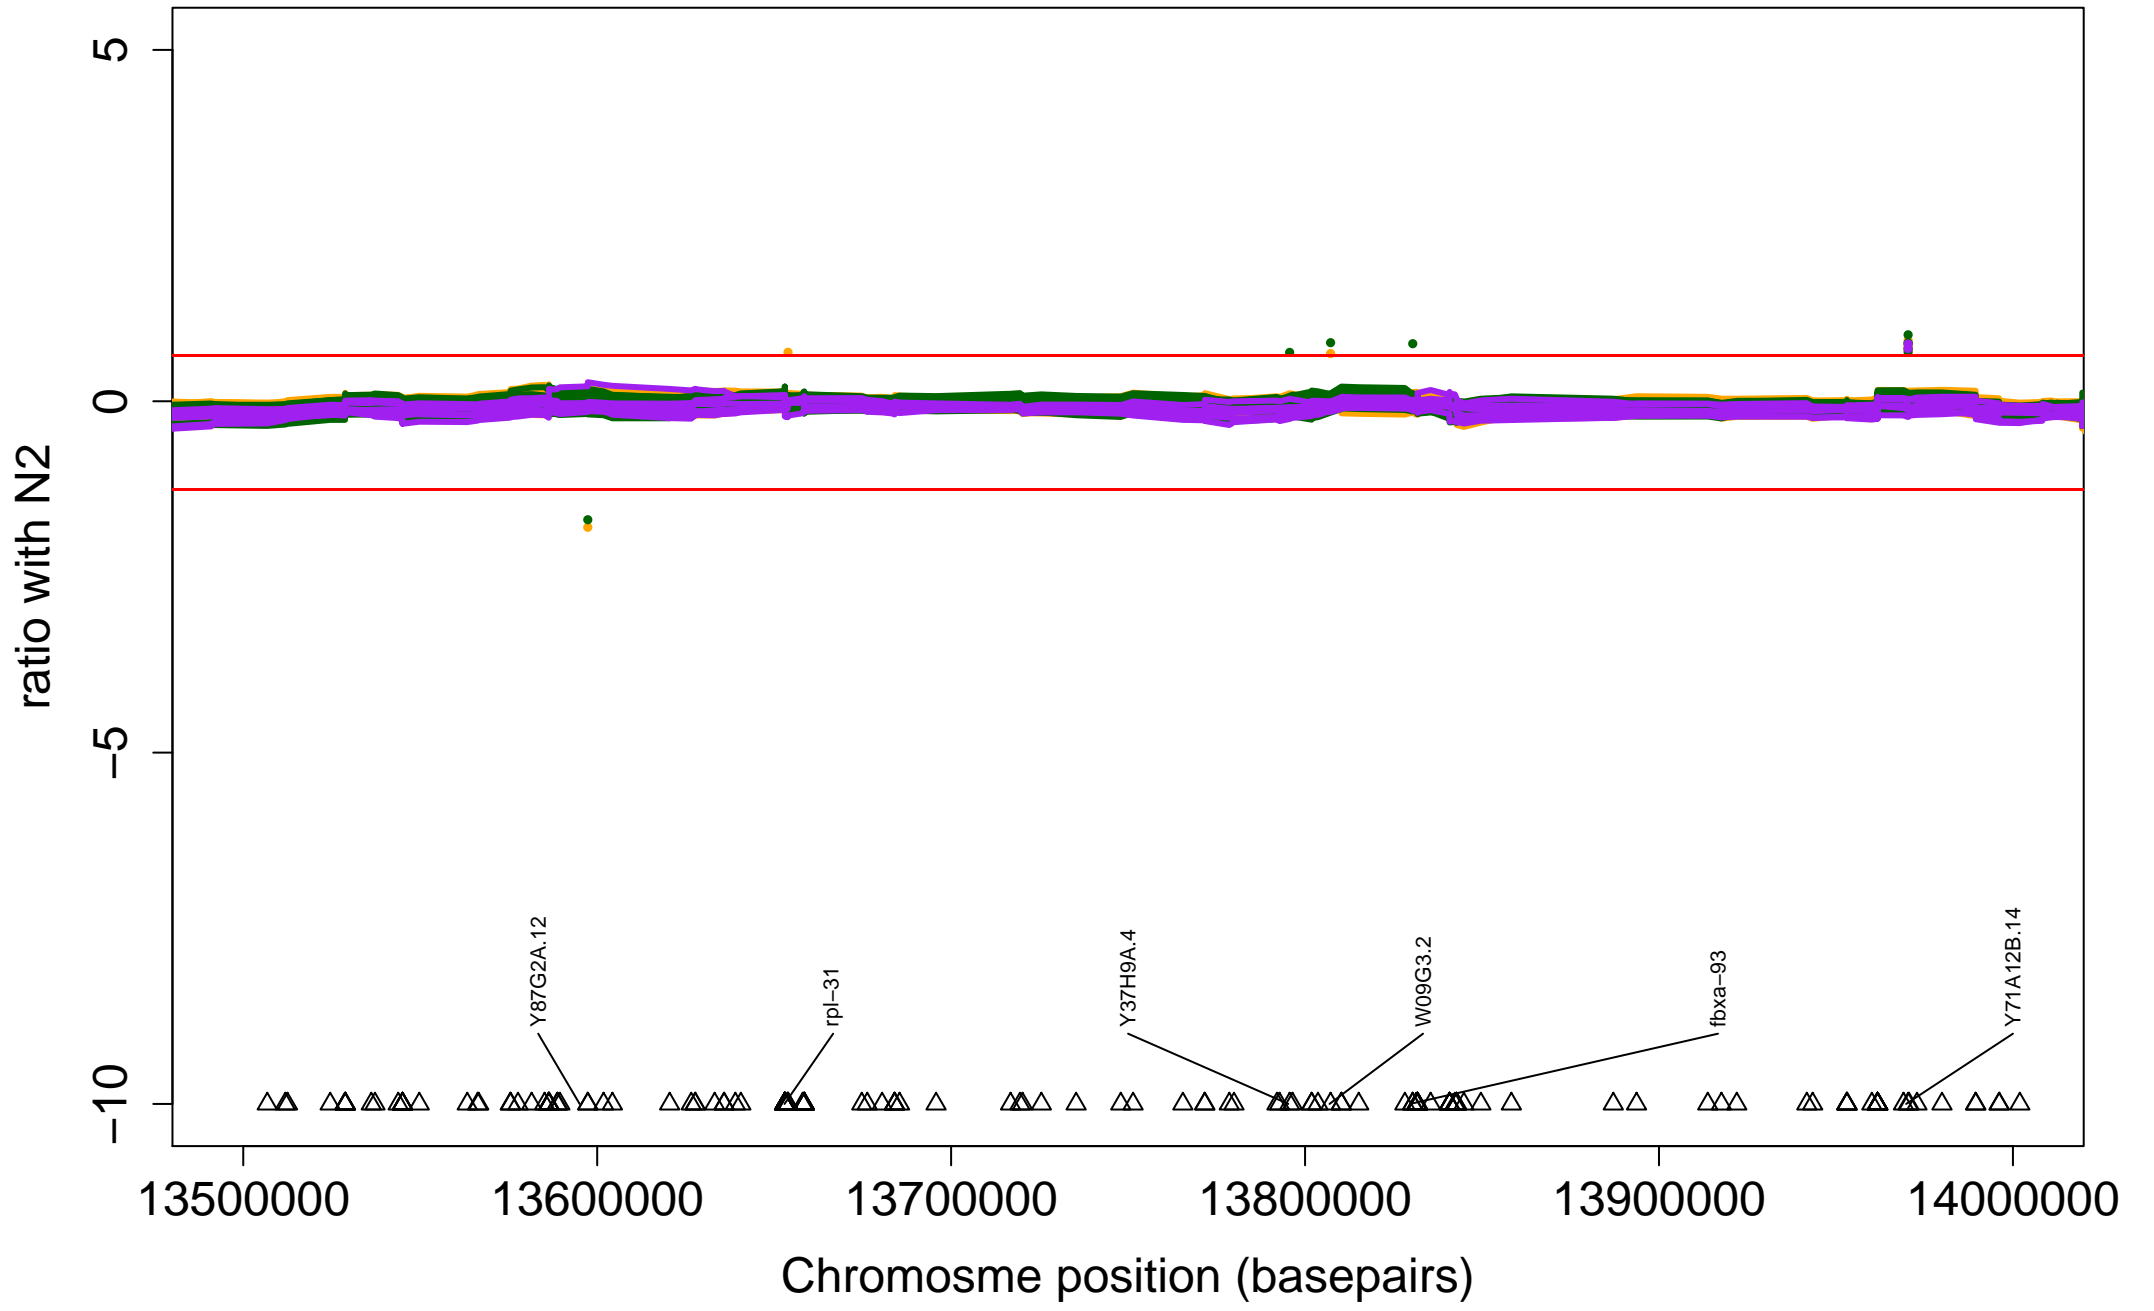



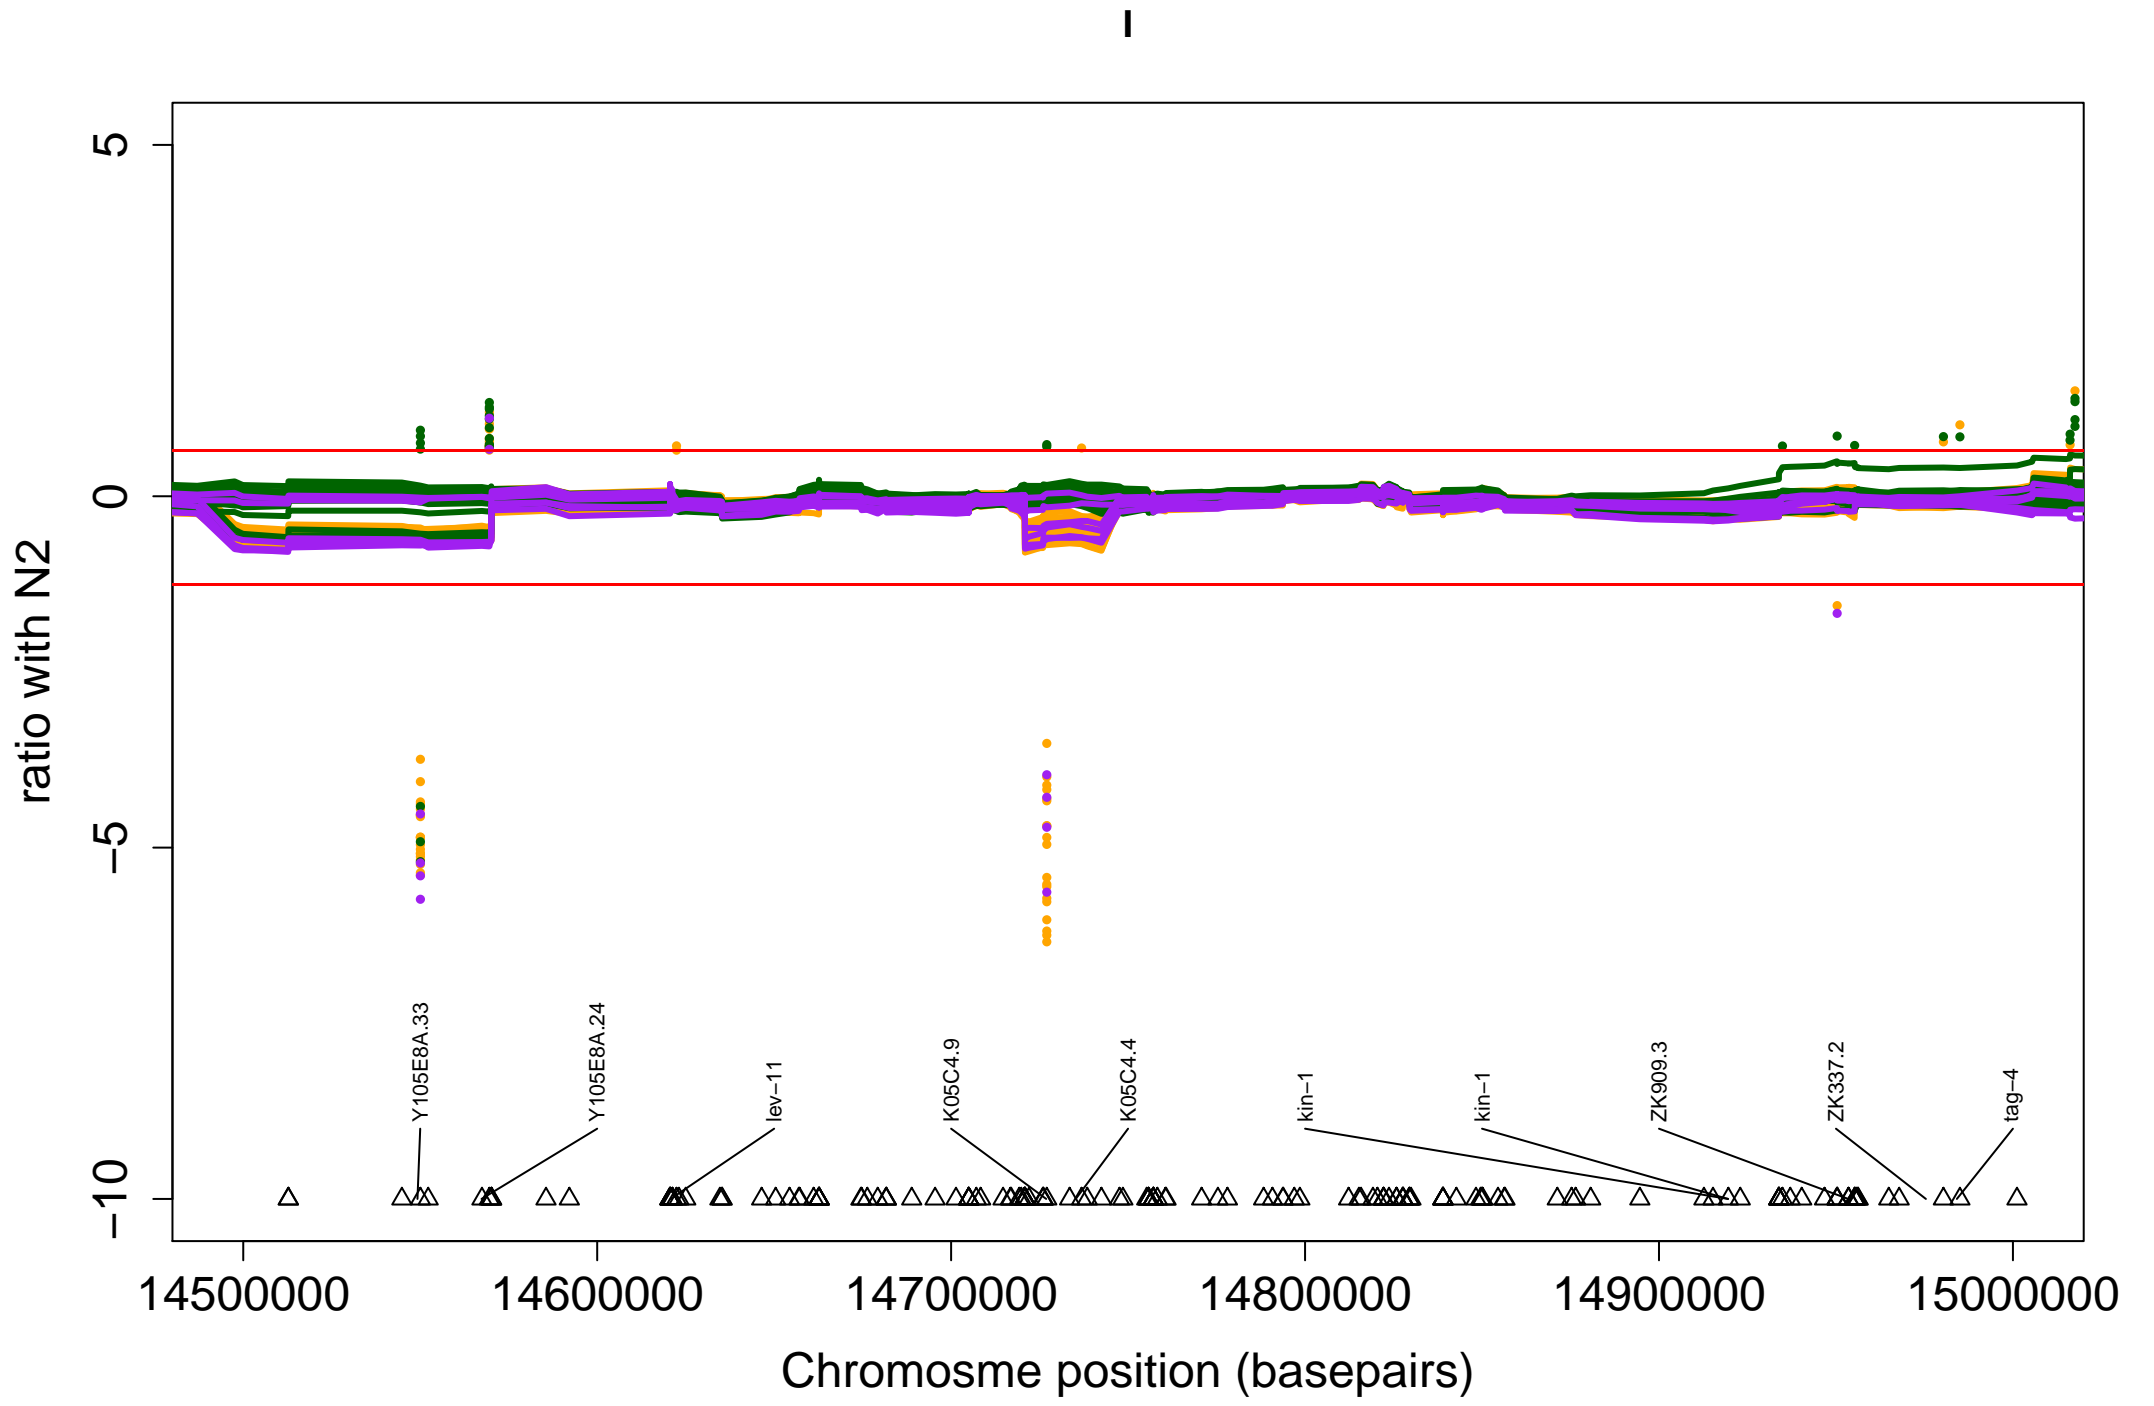



||

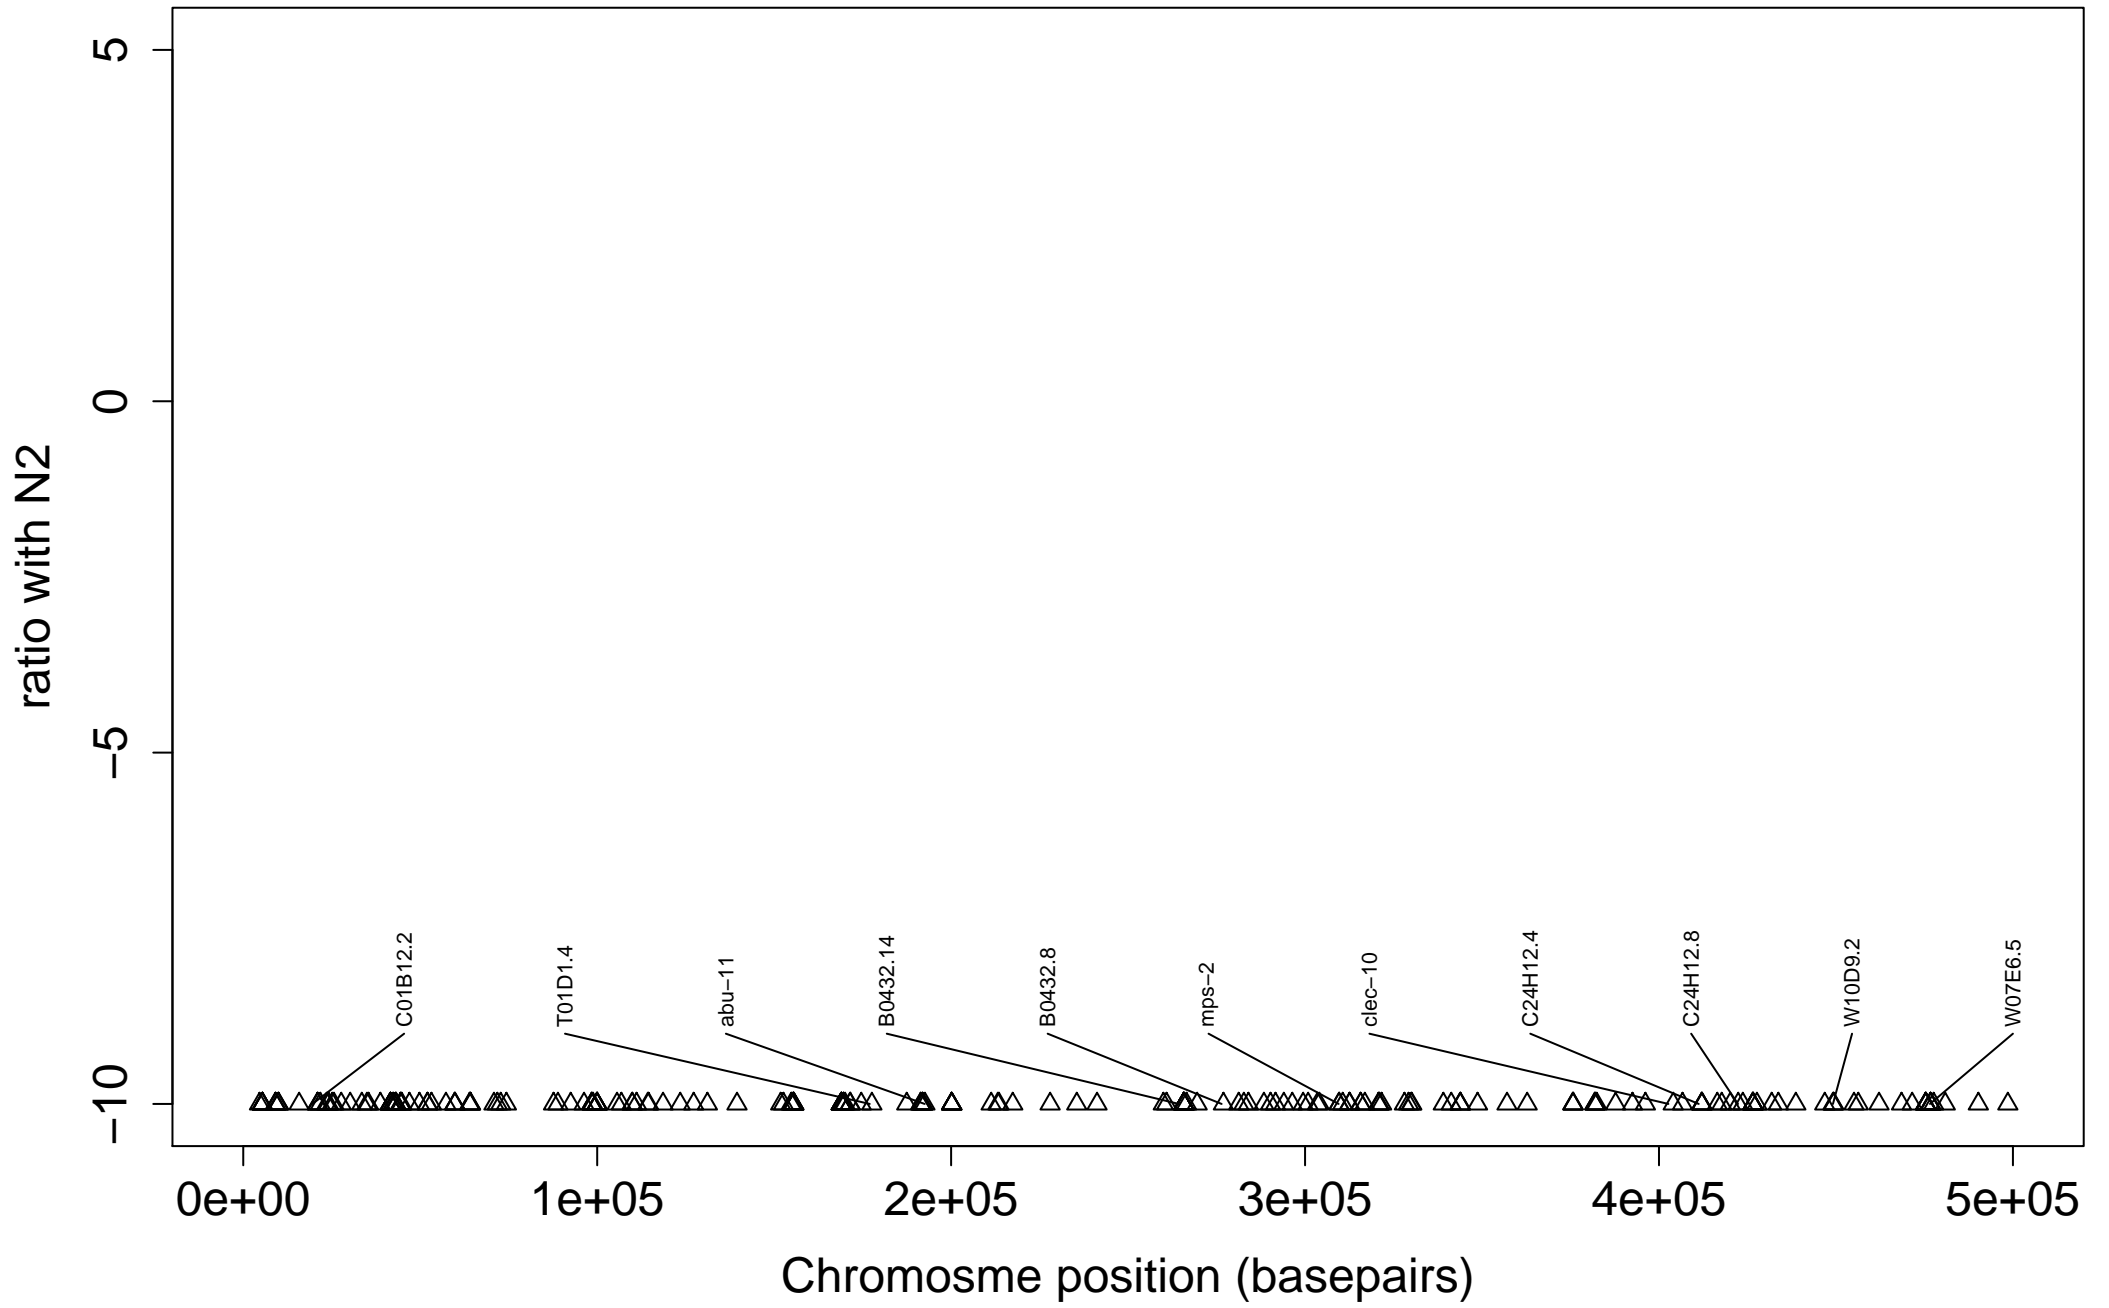



||

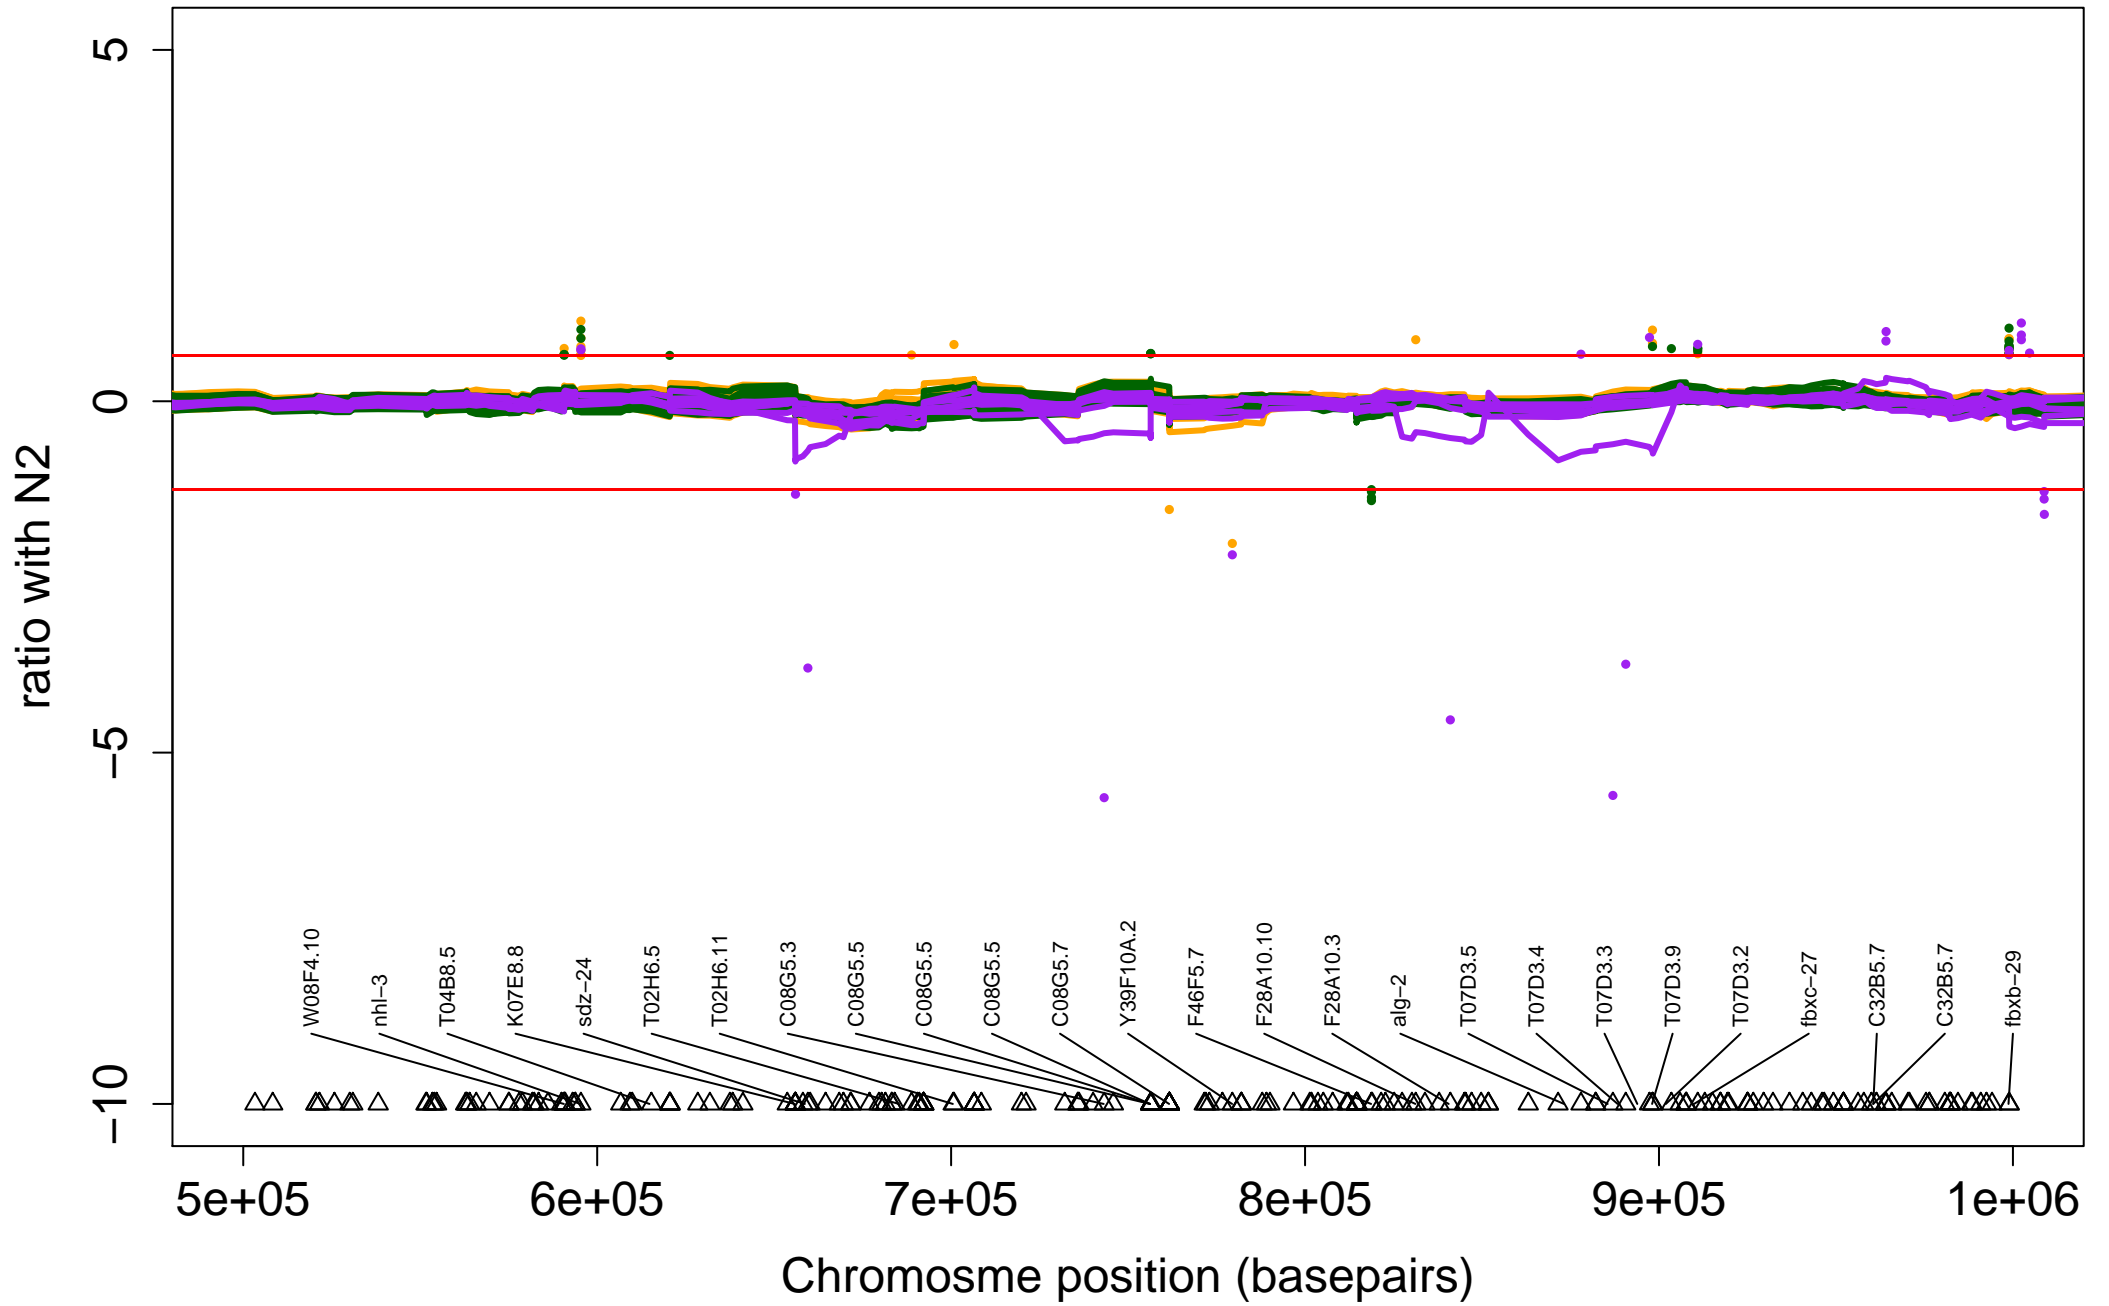

||

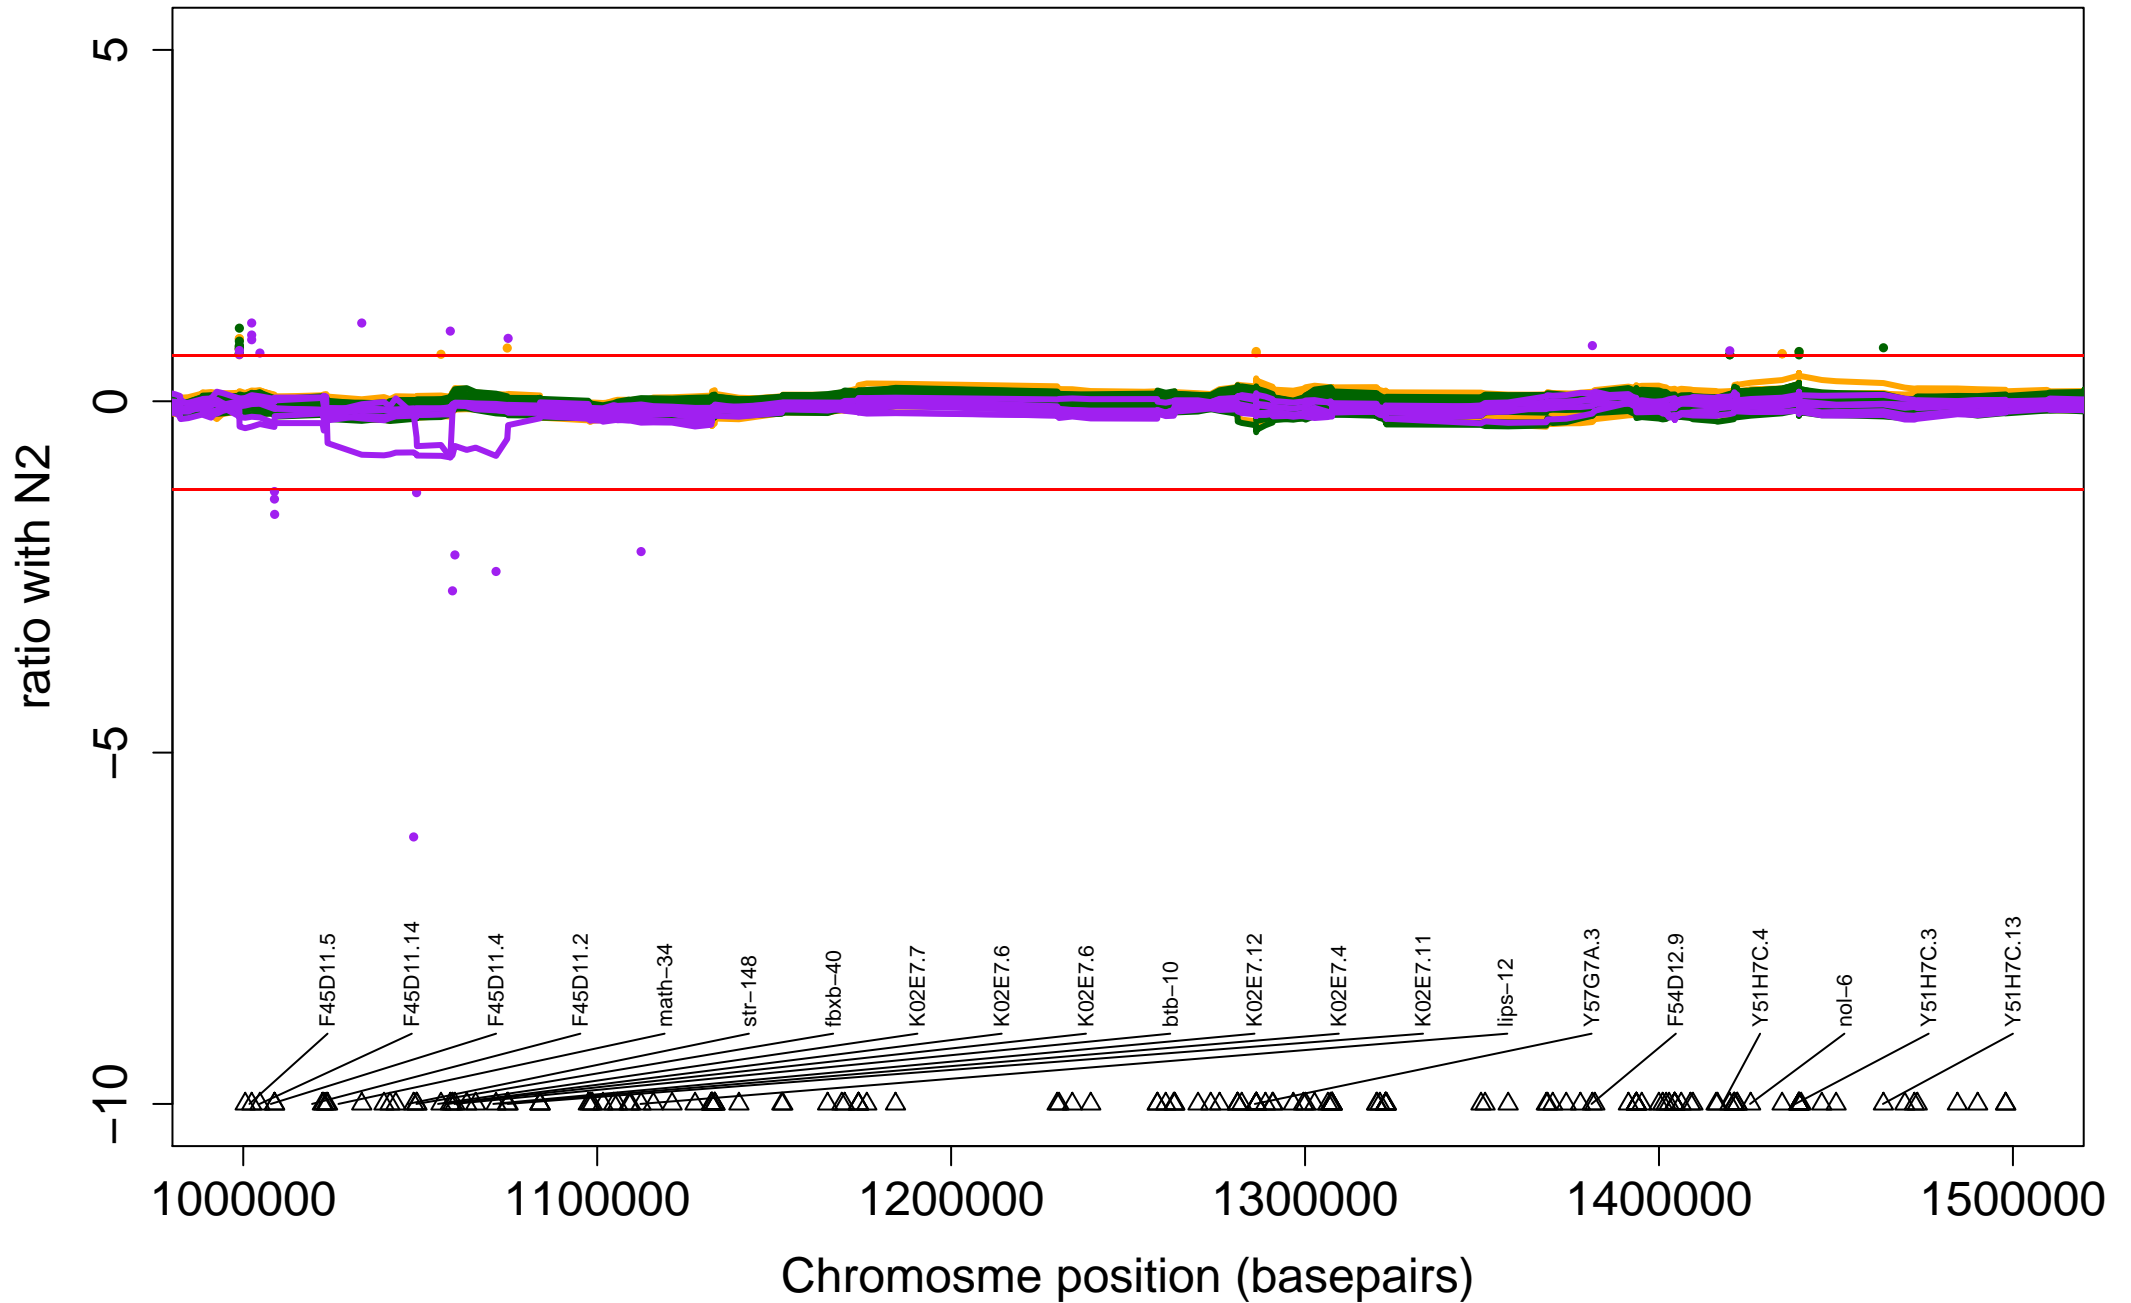

II

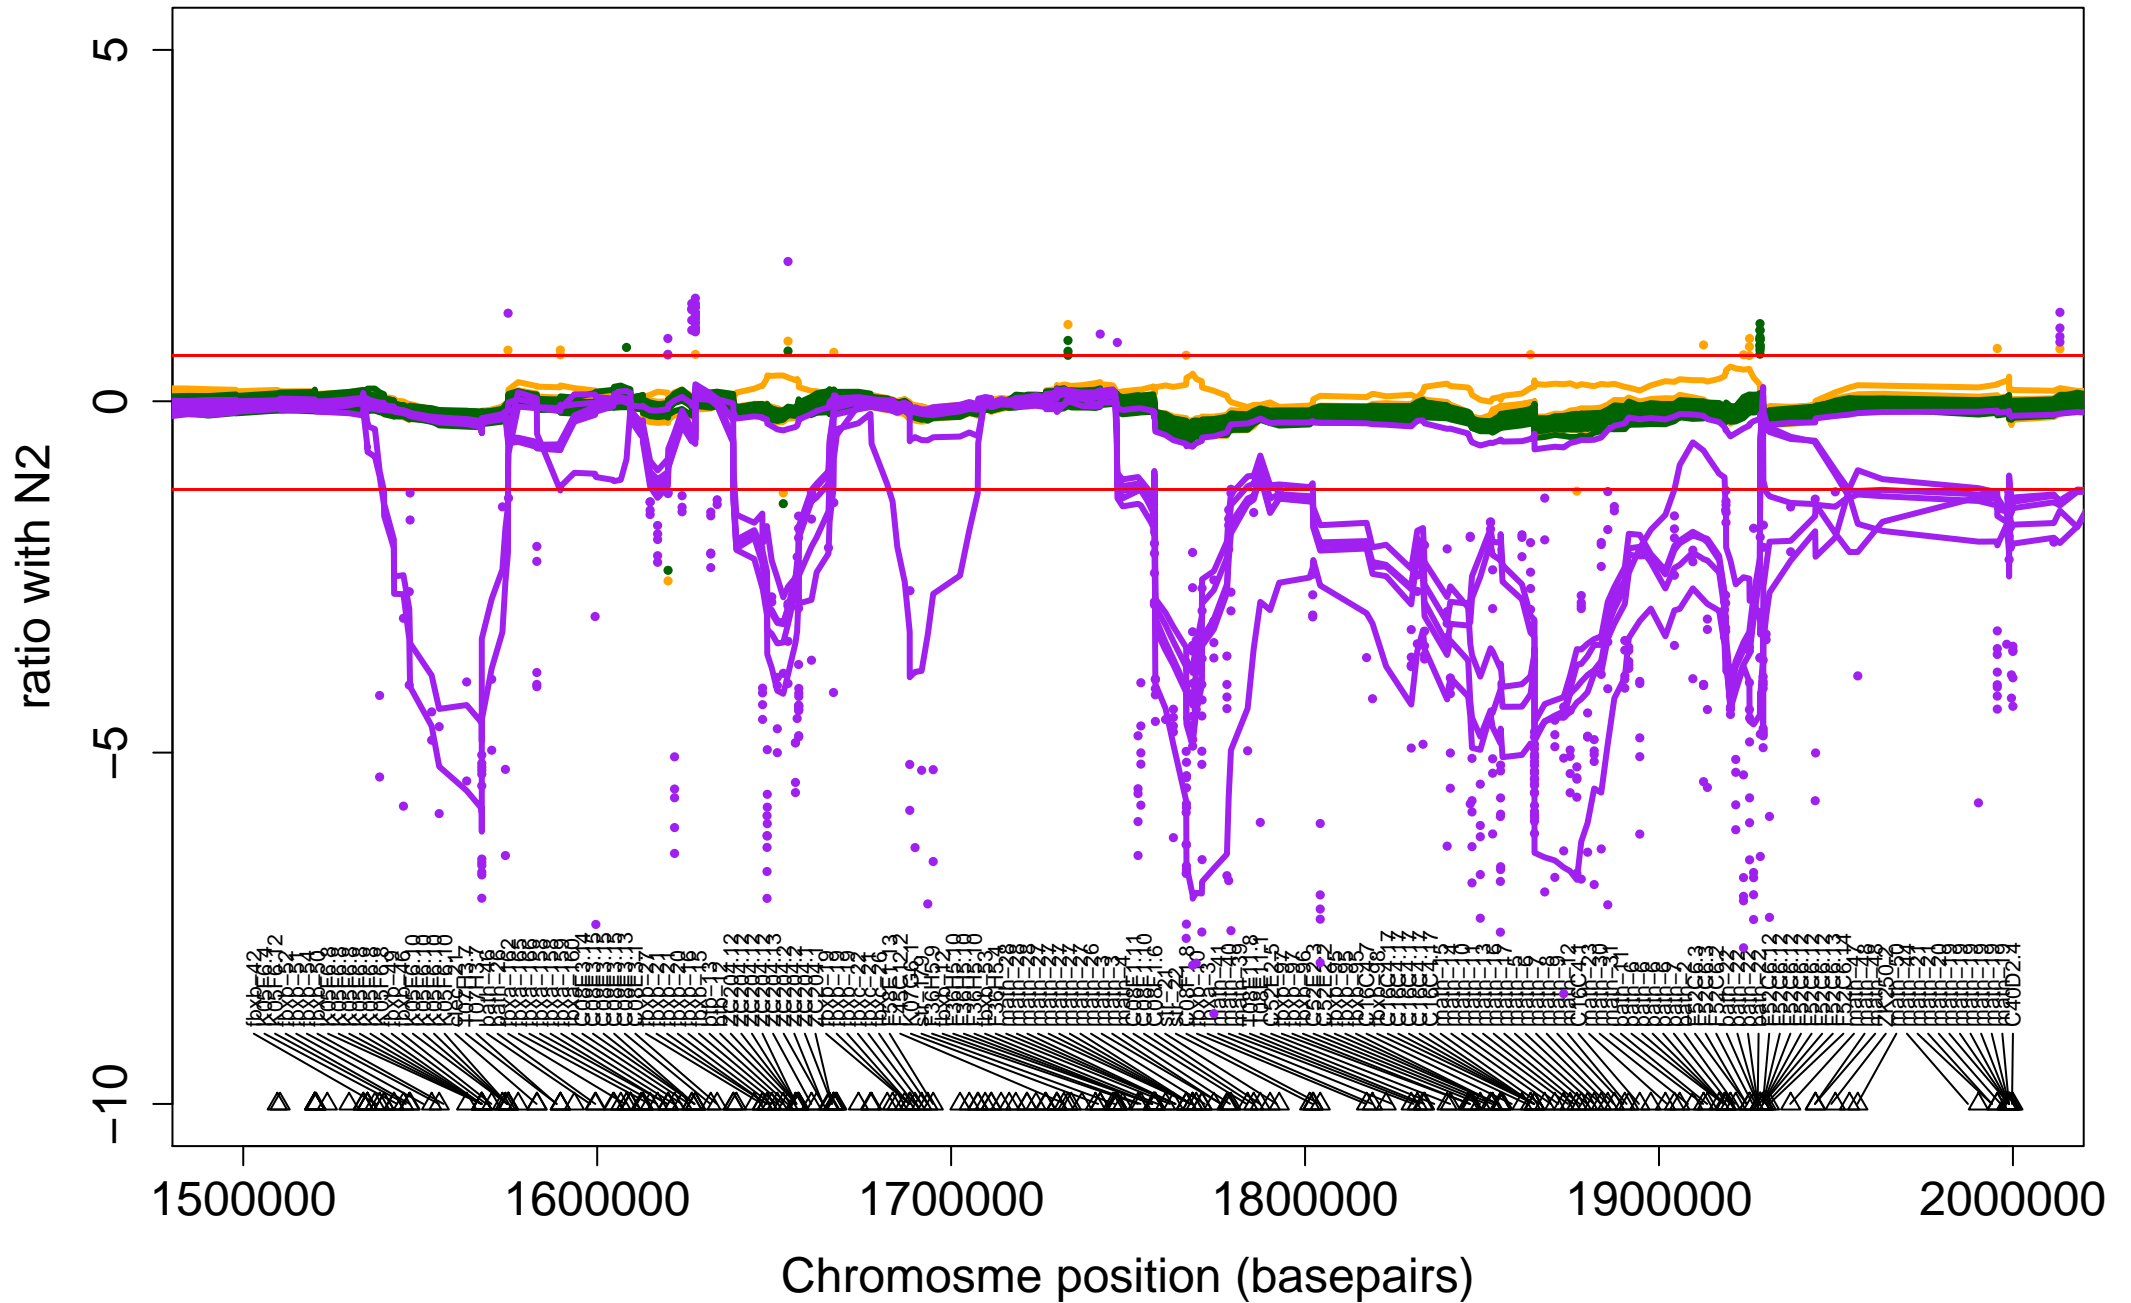

II

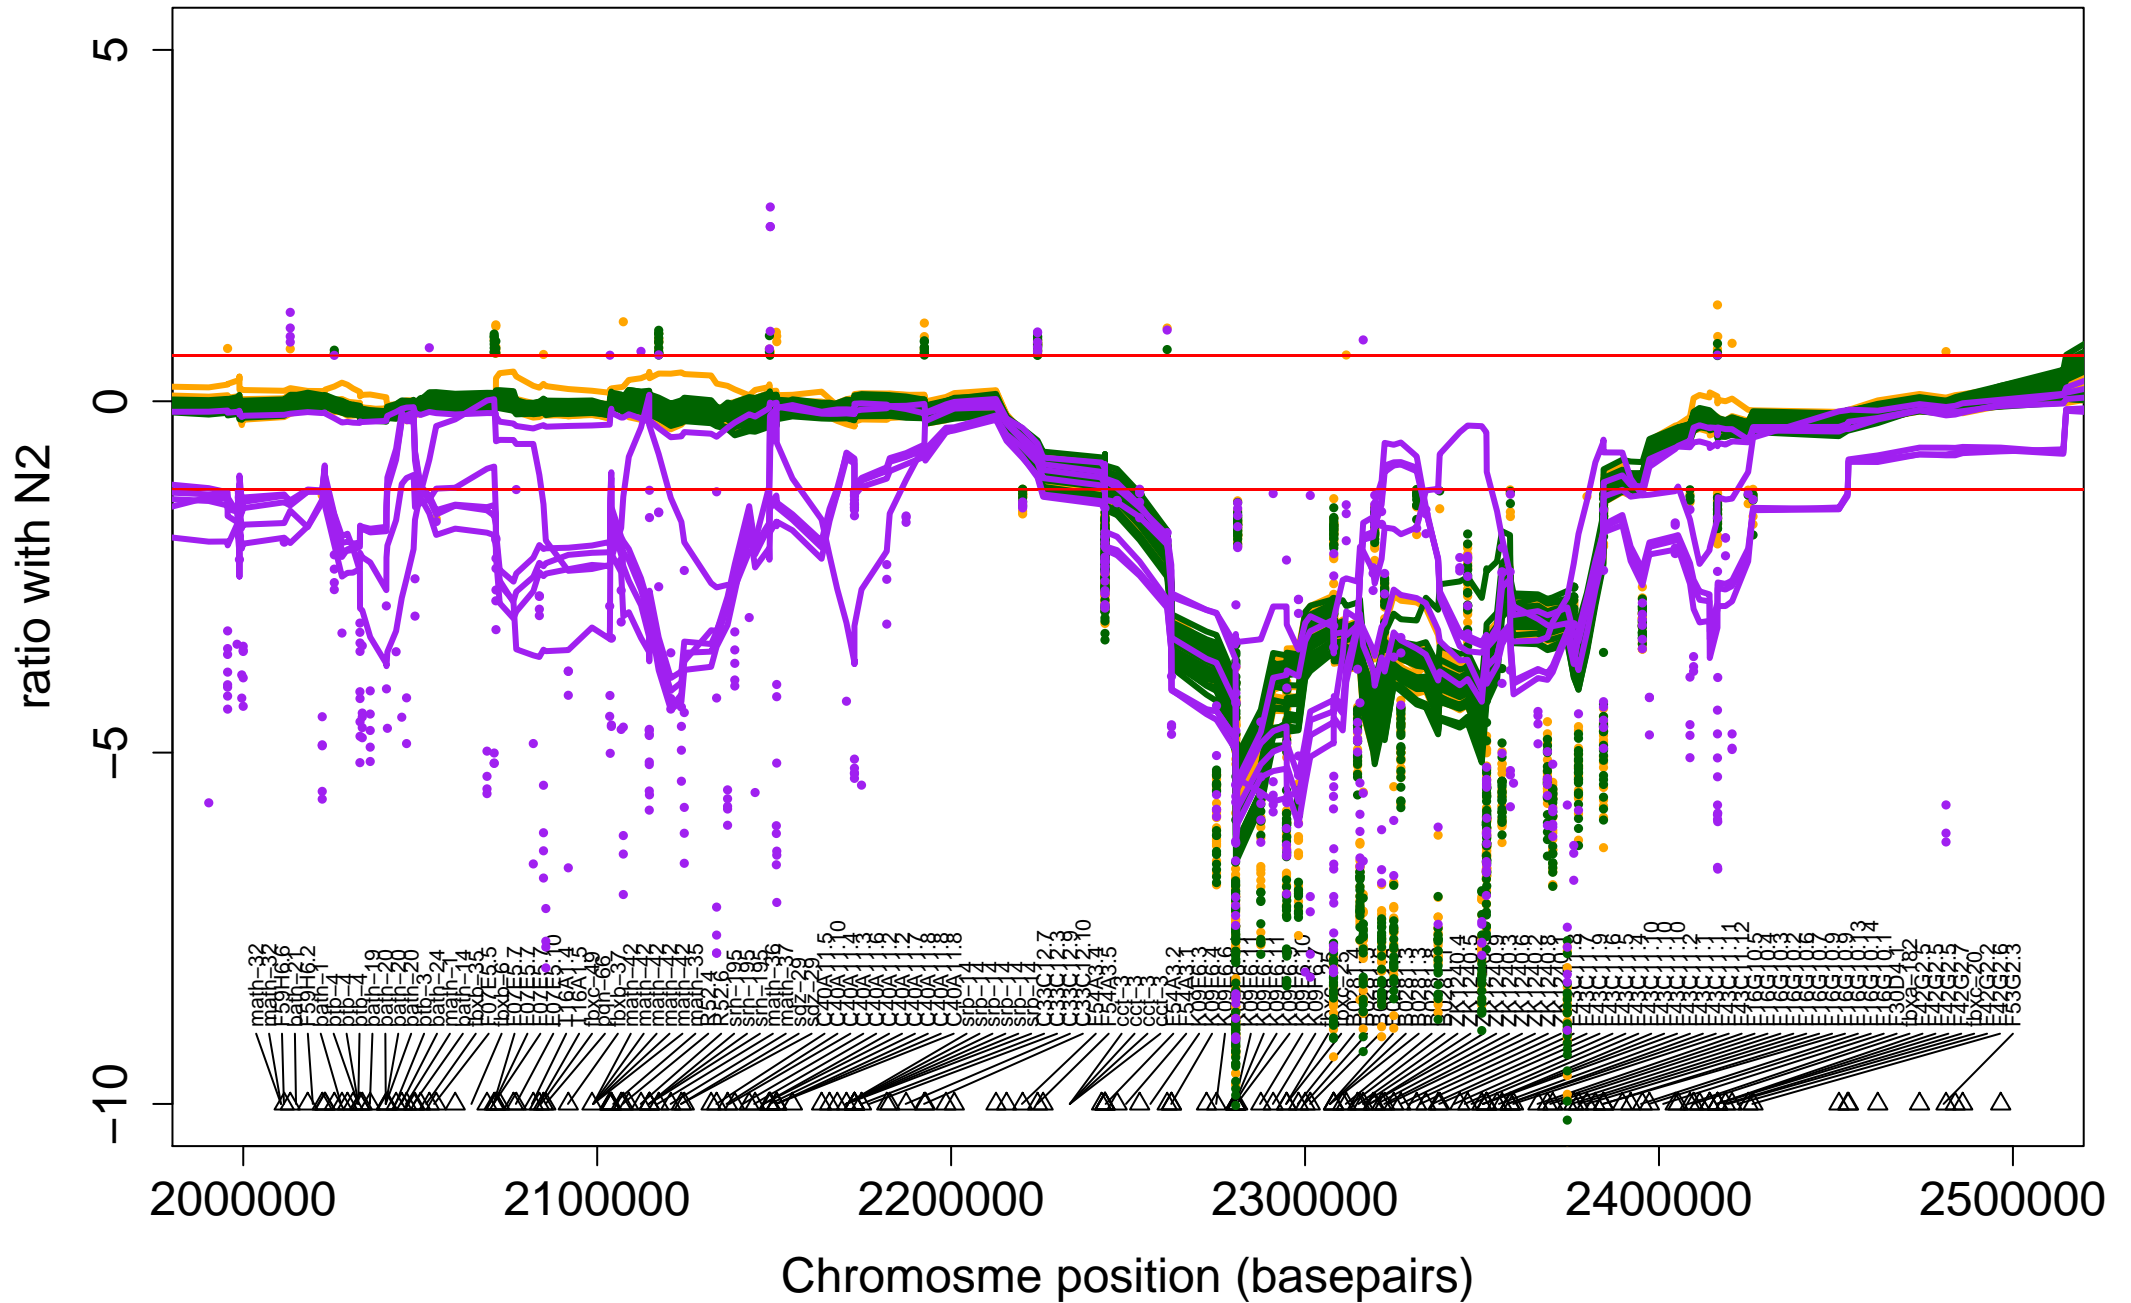

||

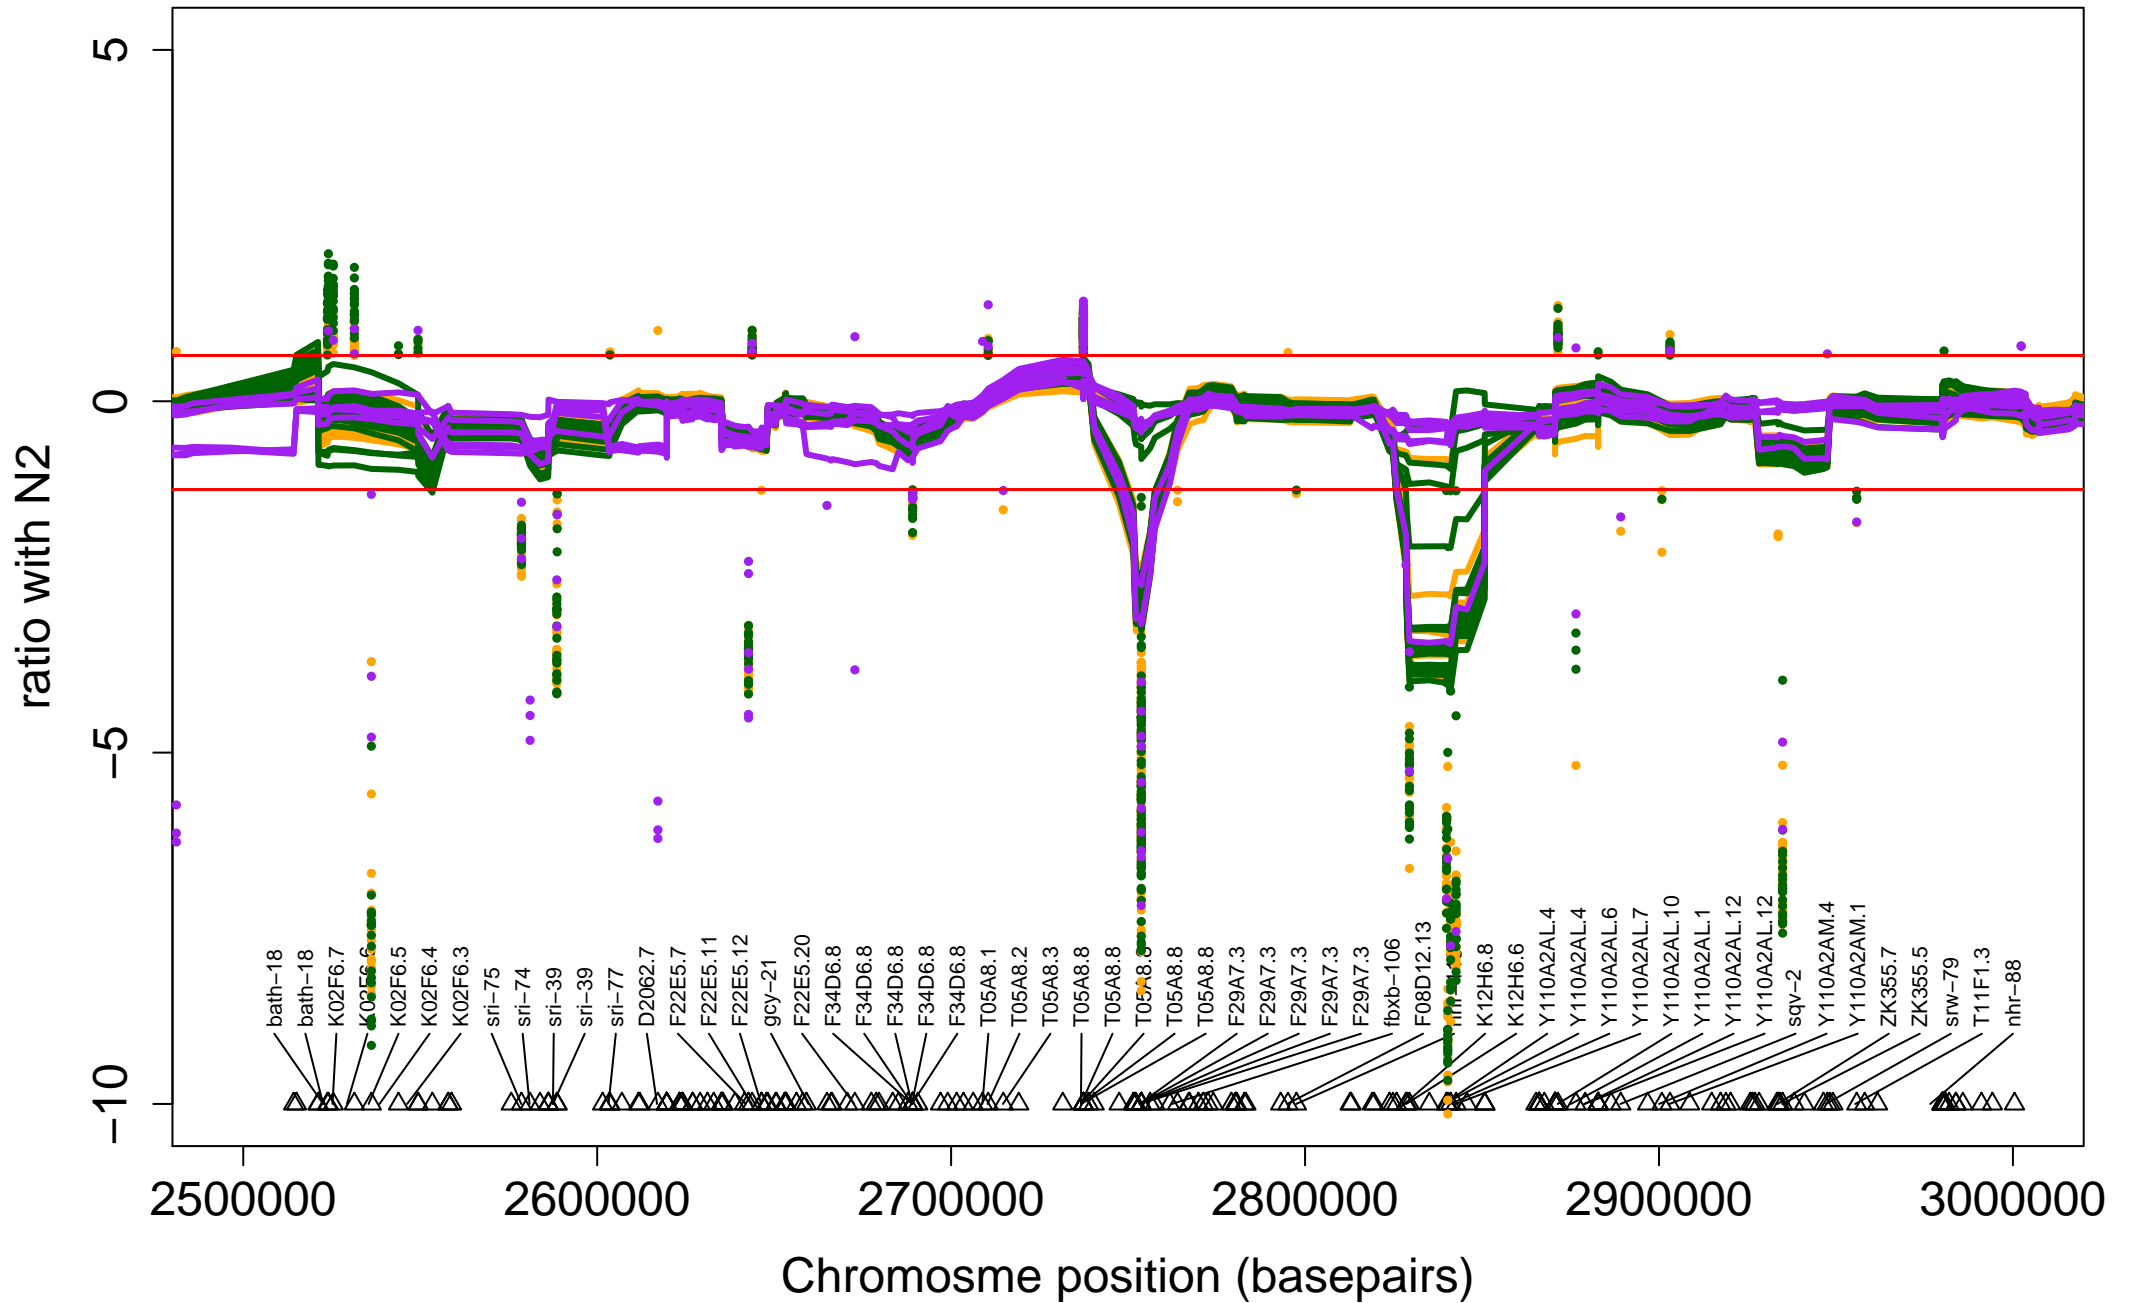

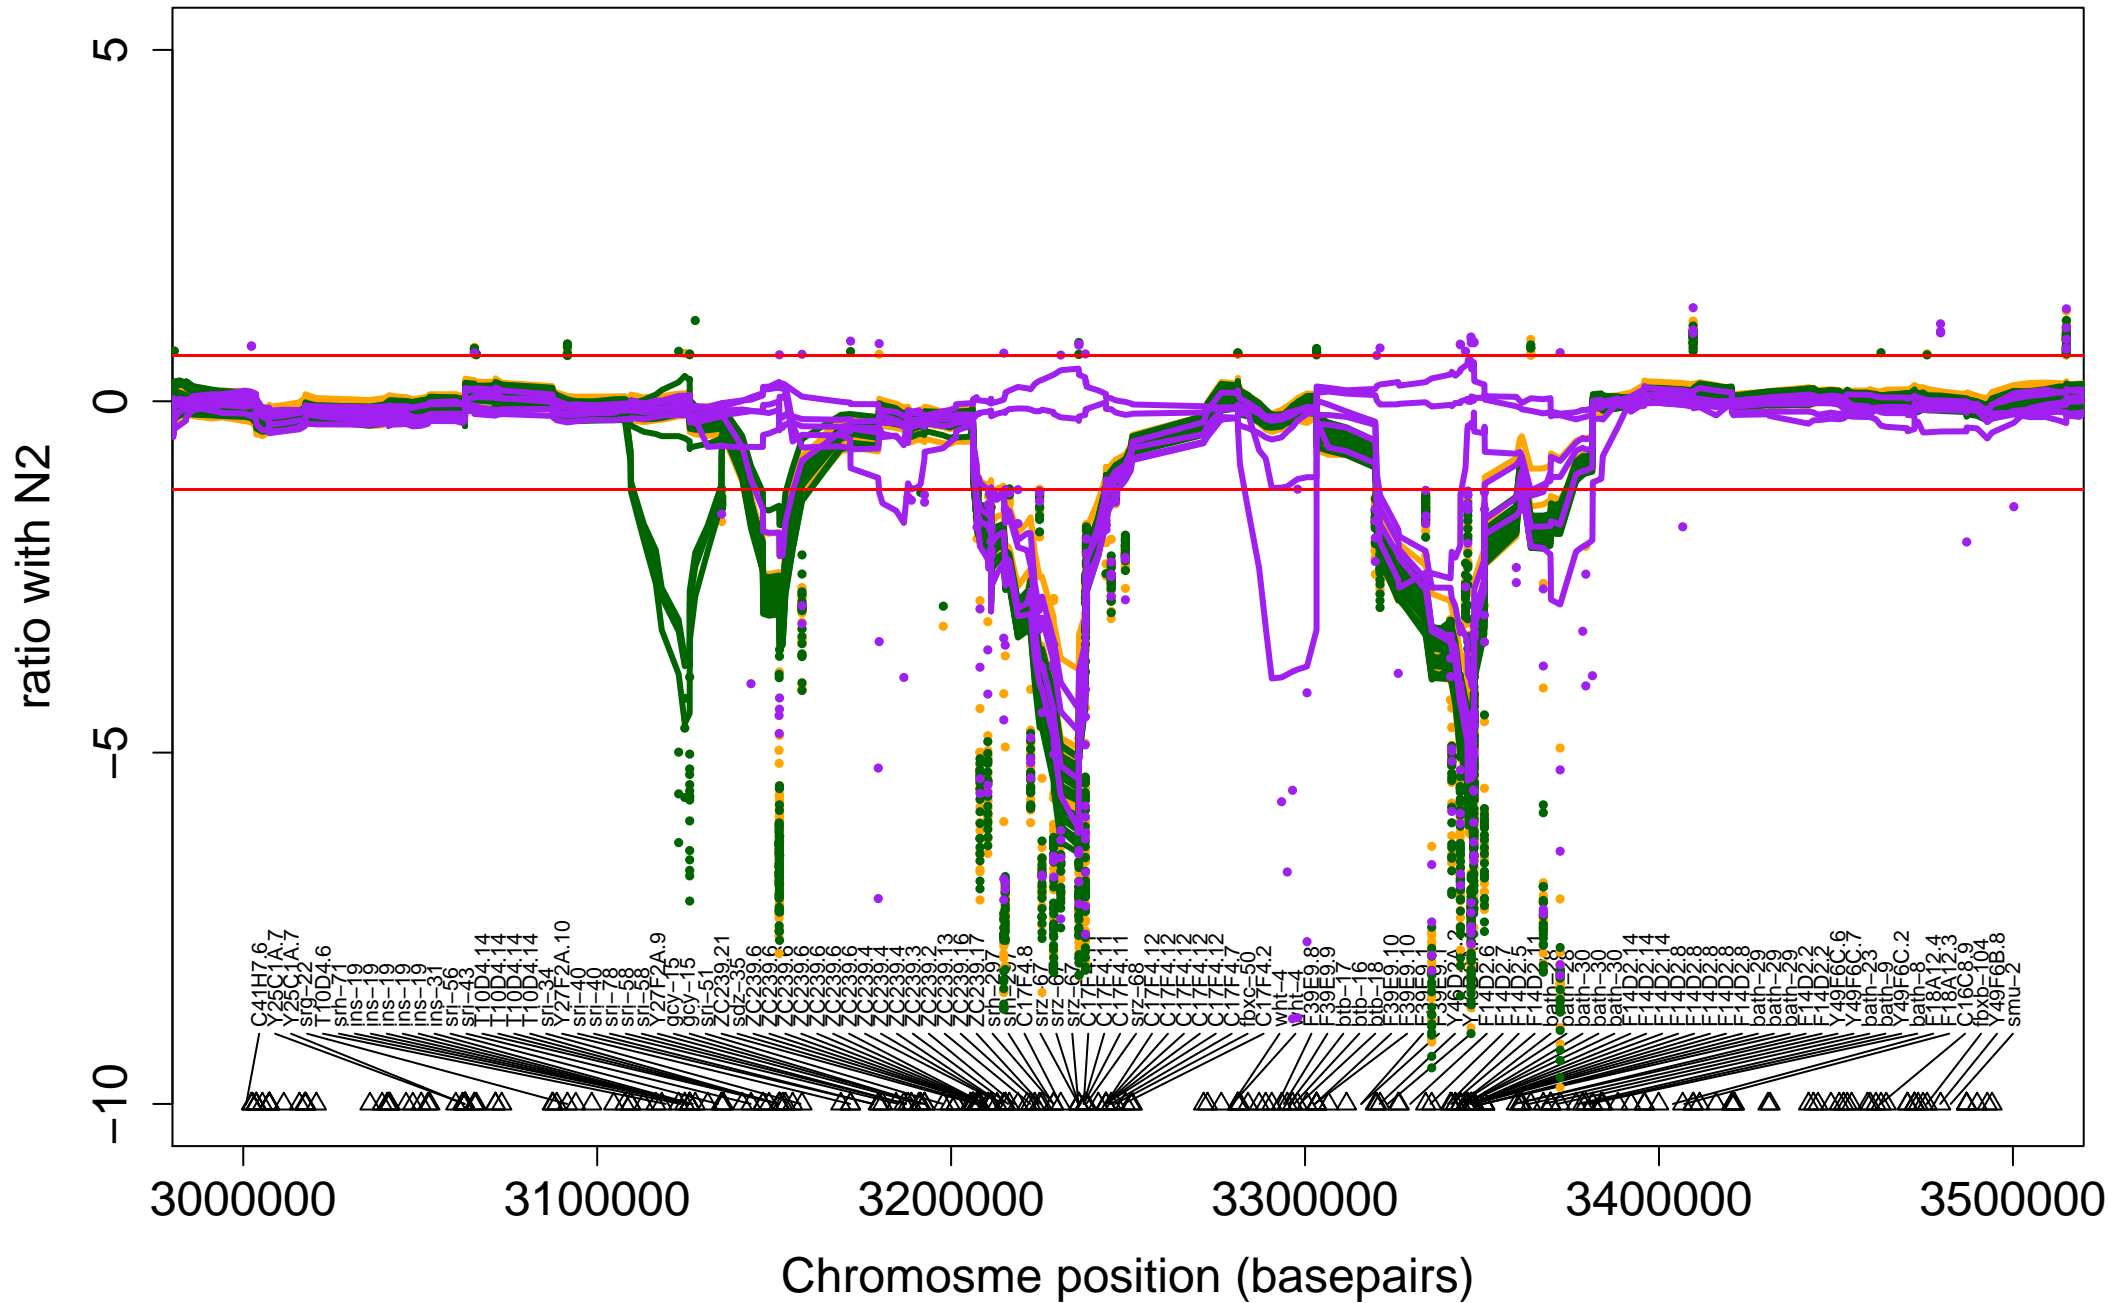

||

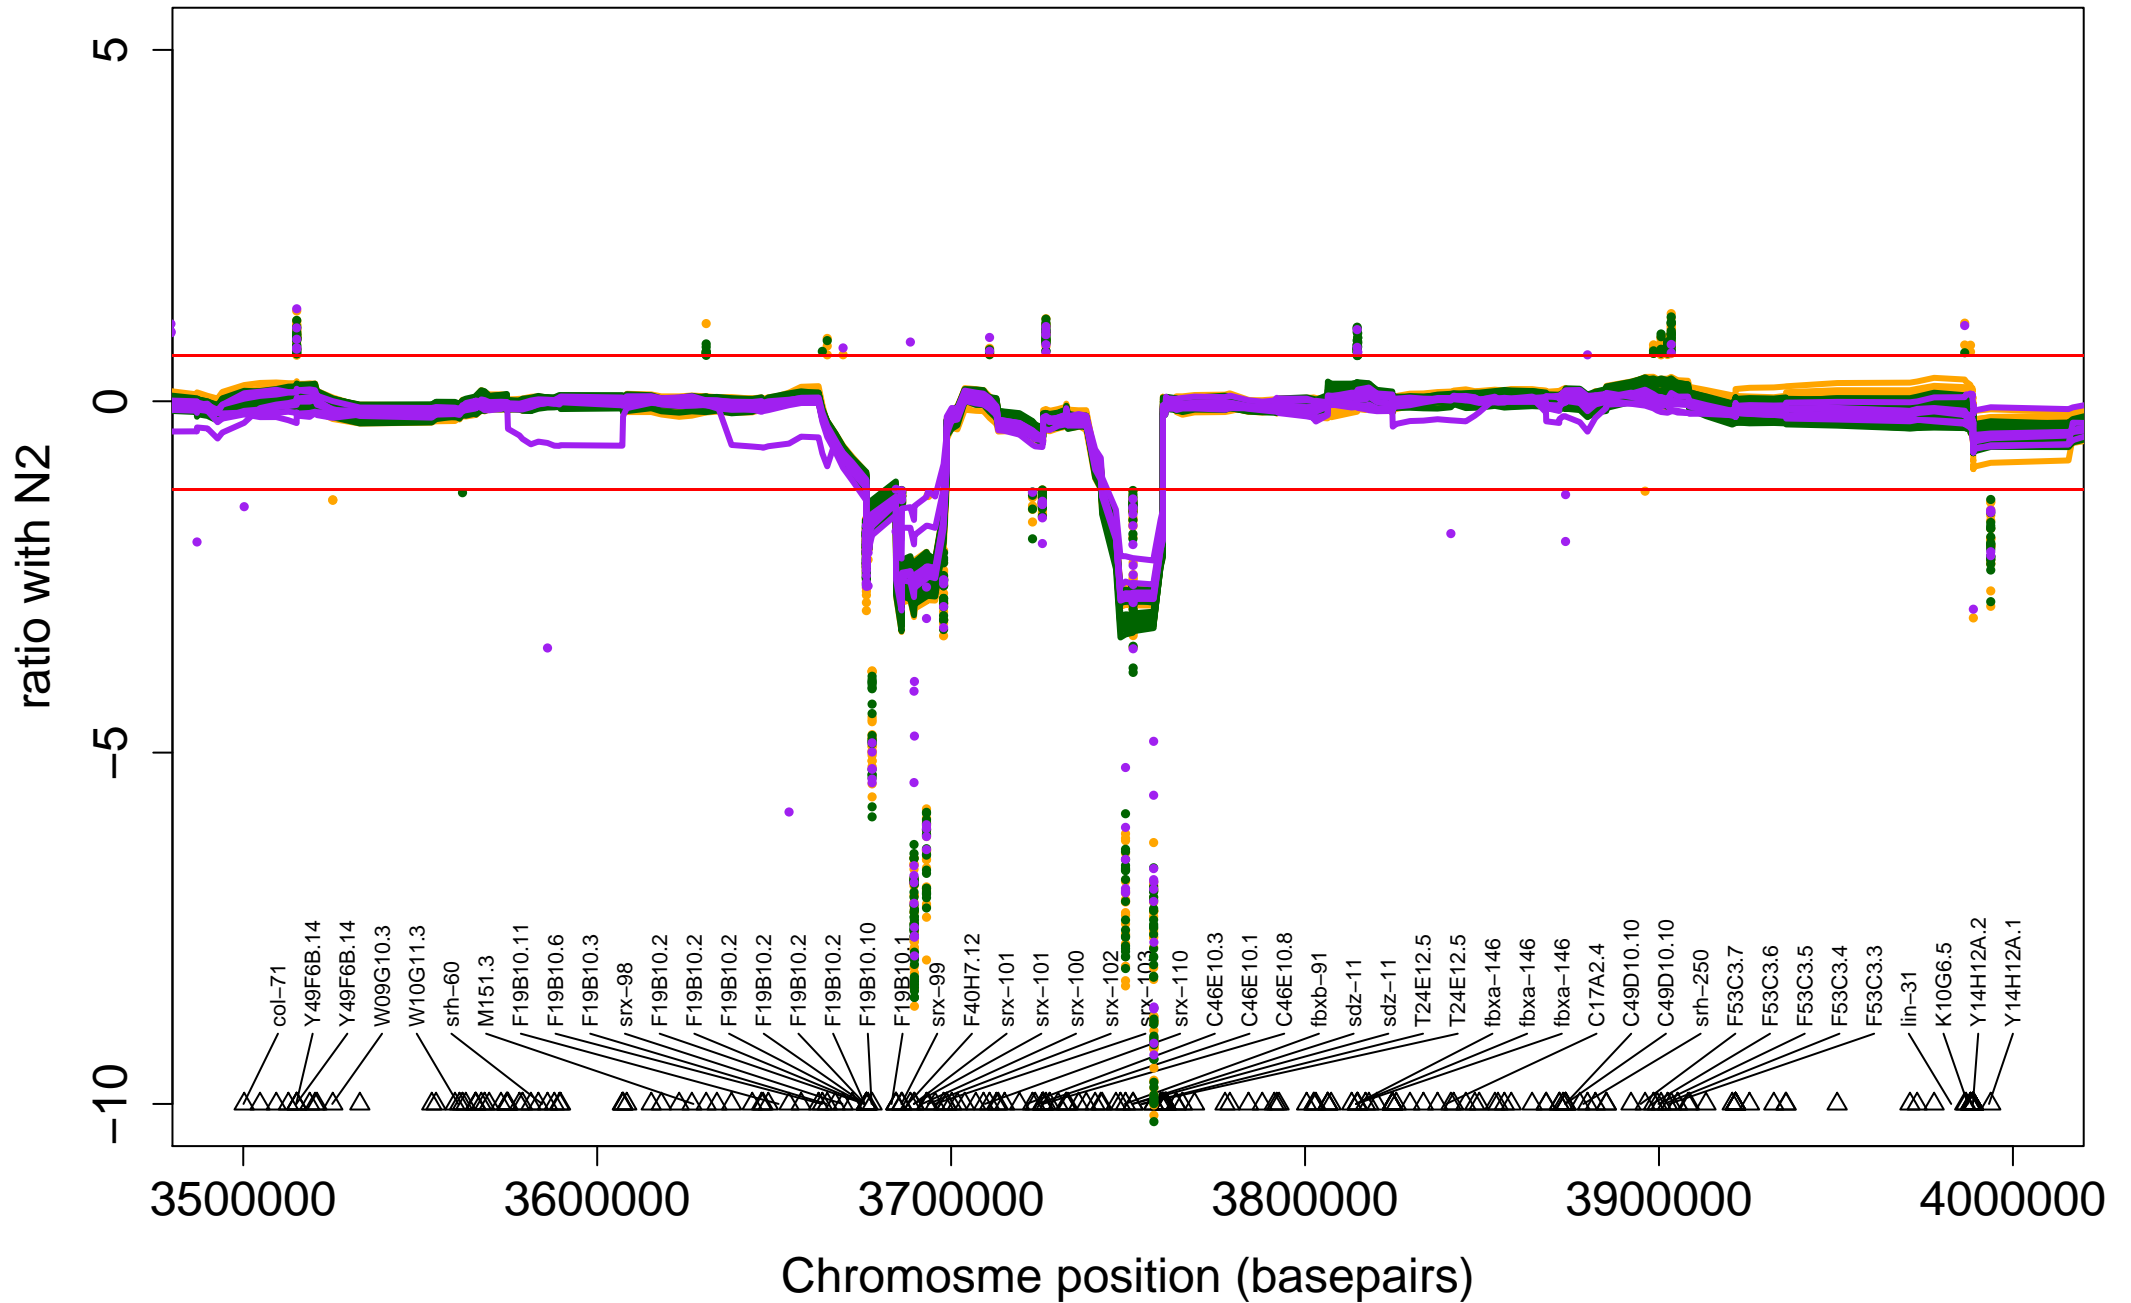

II

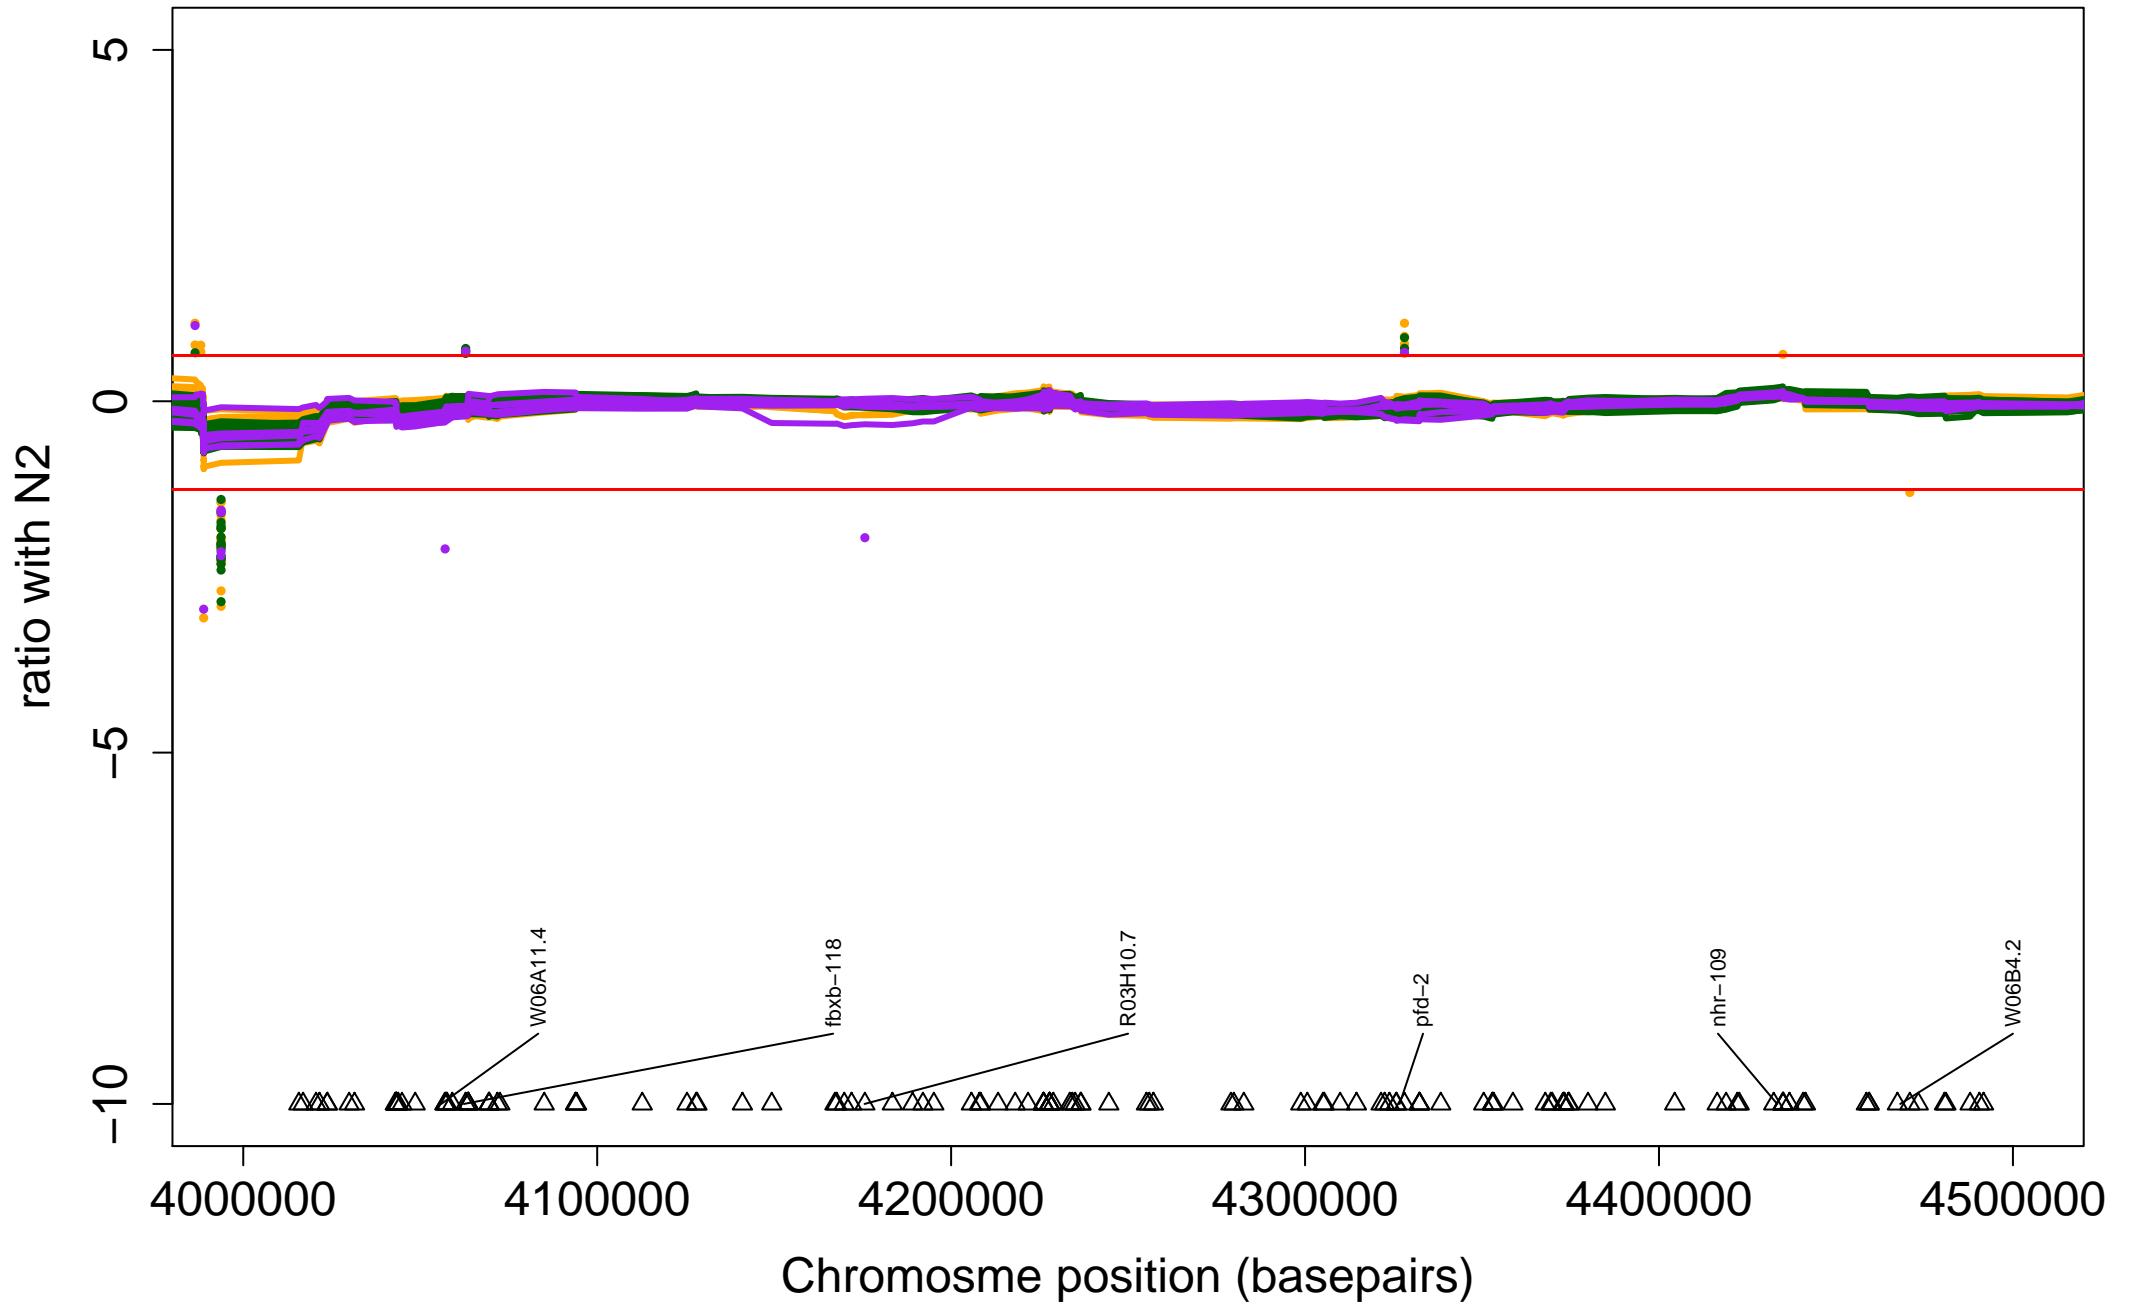



||

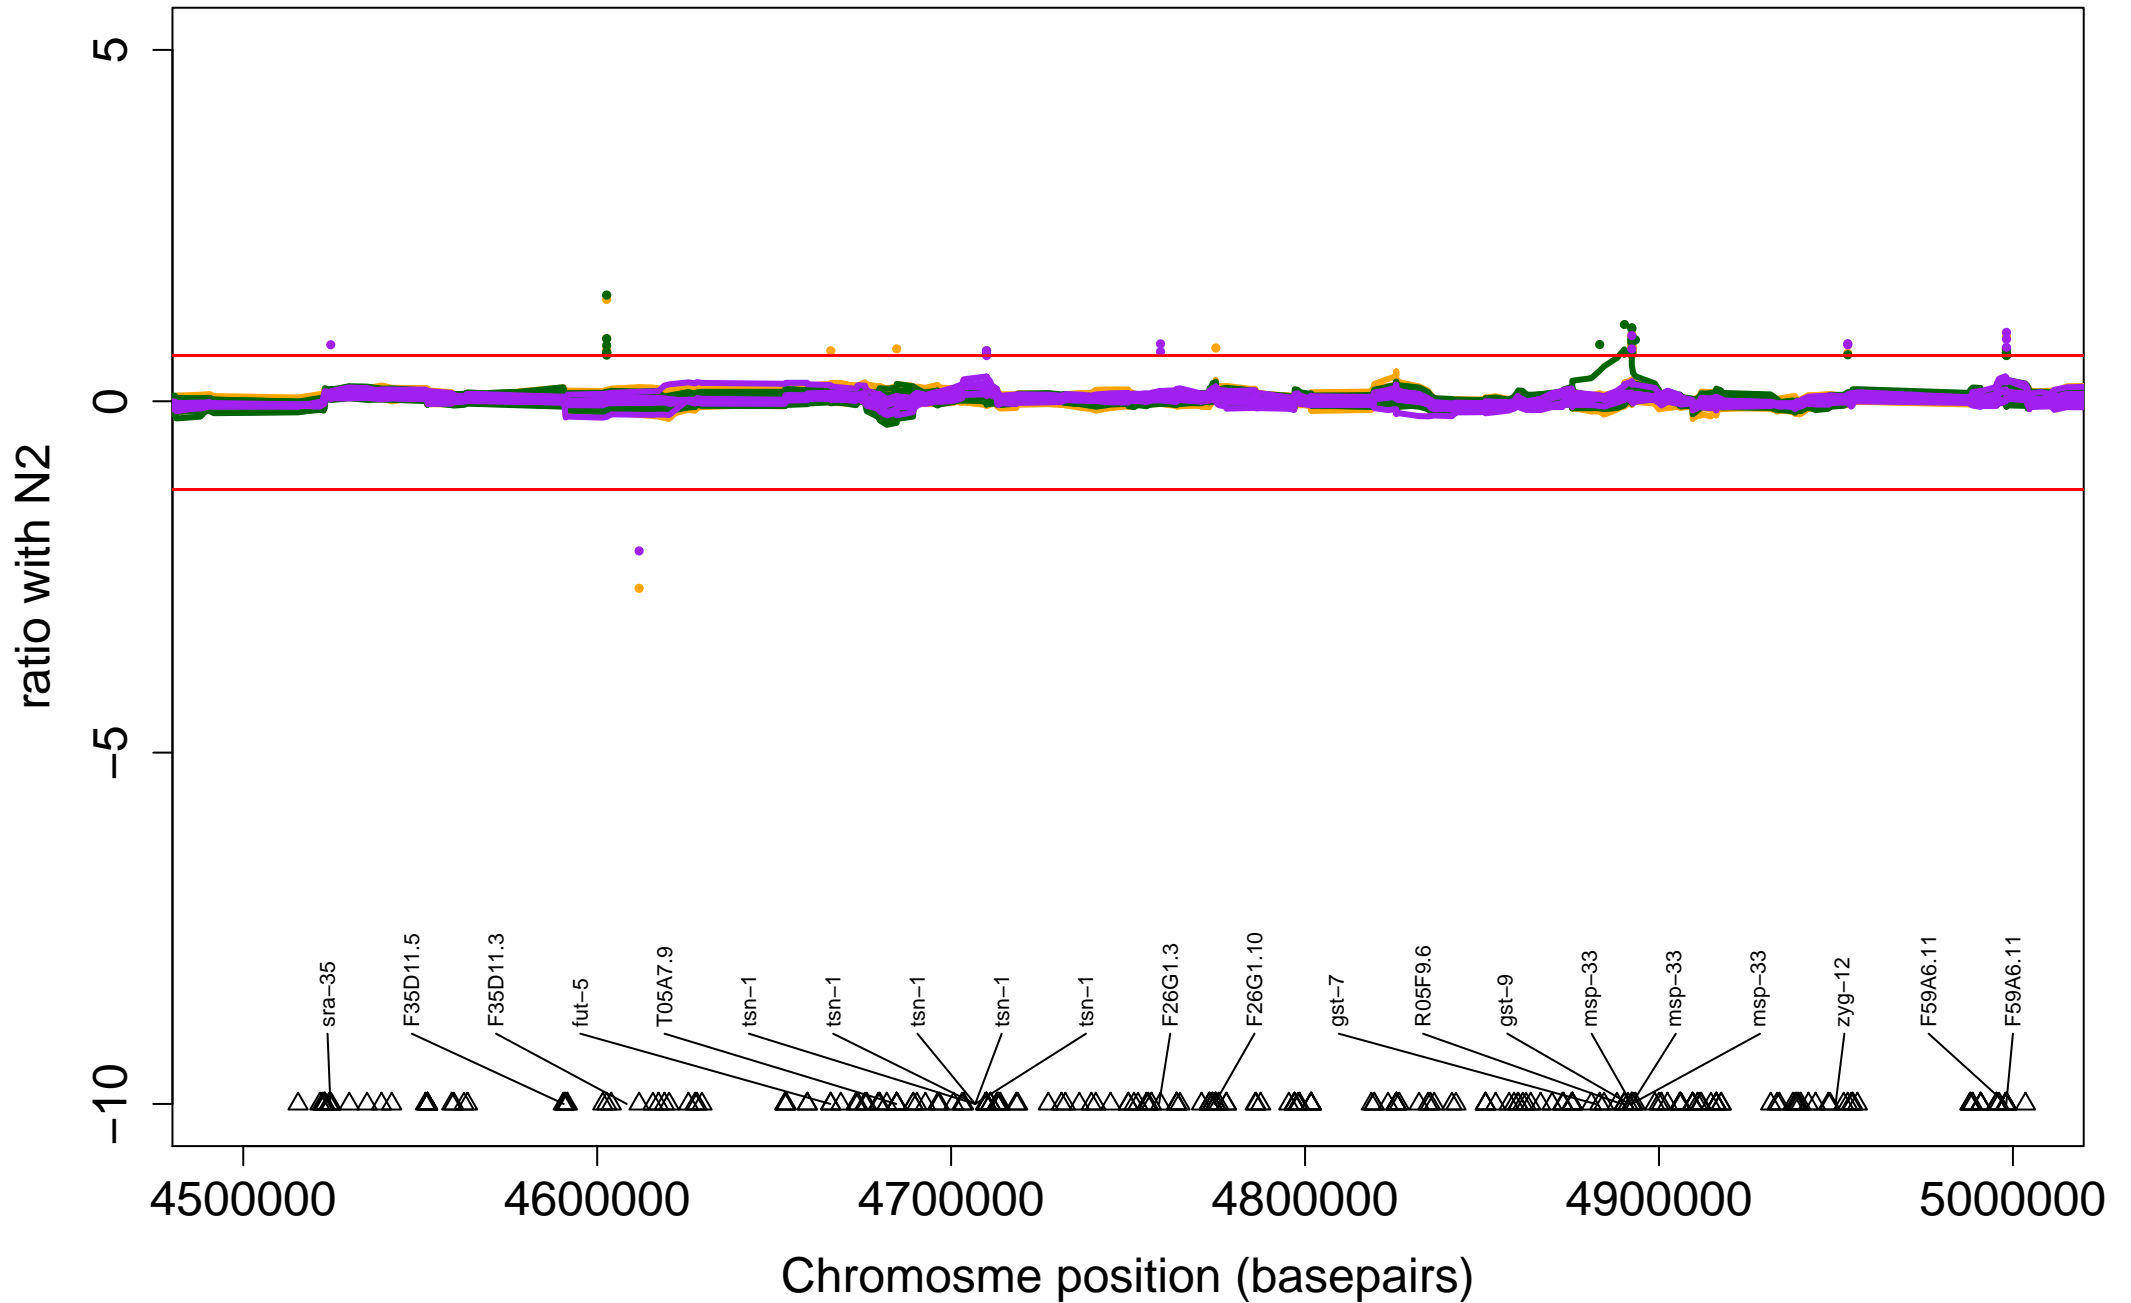

||

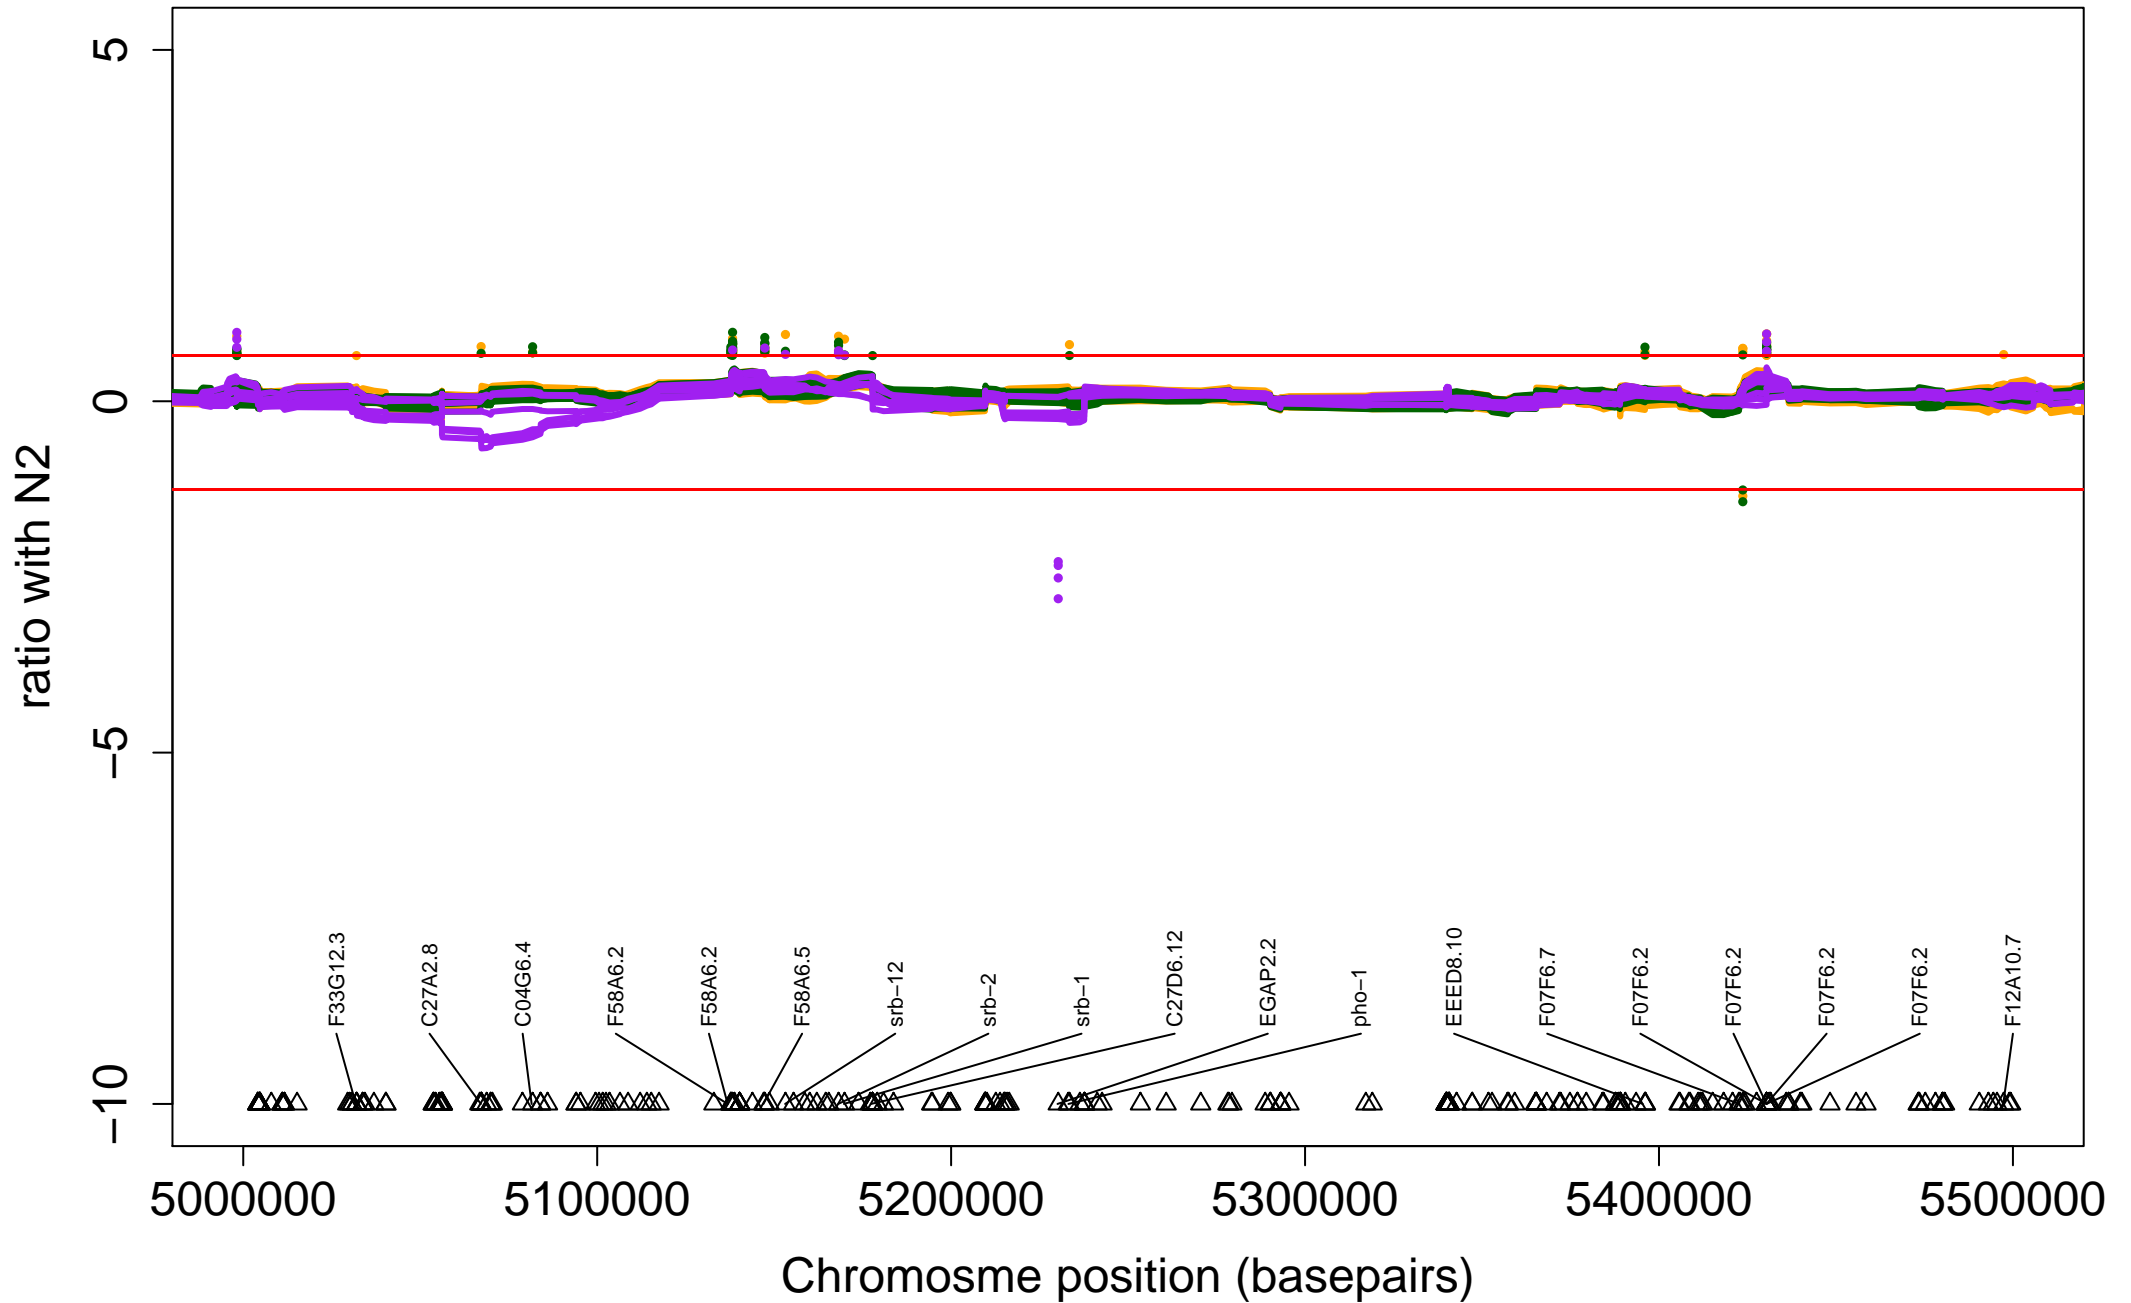

||

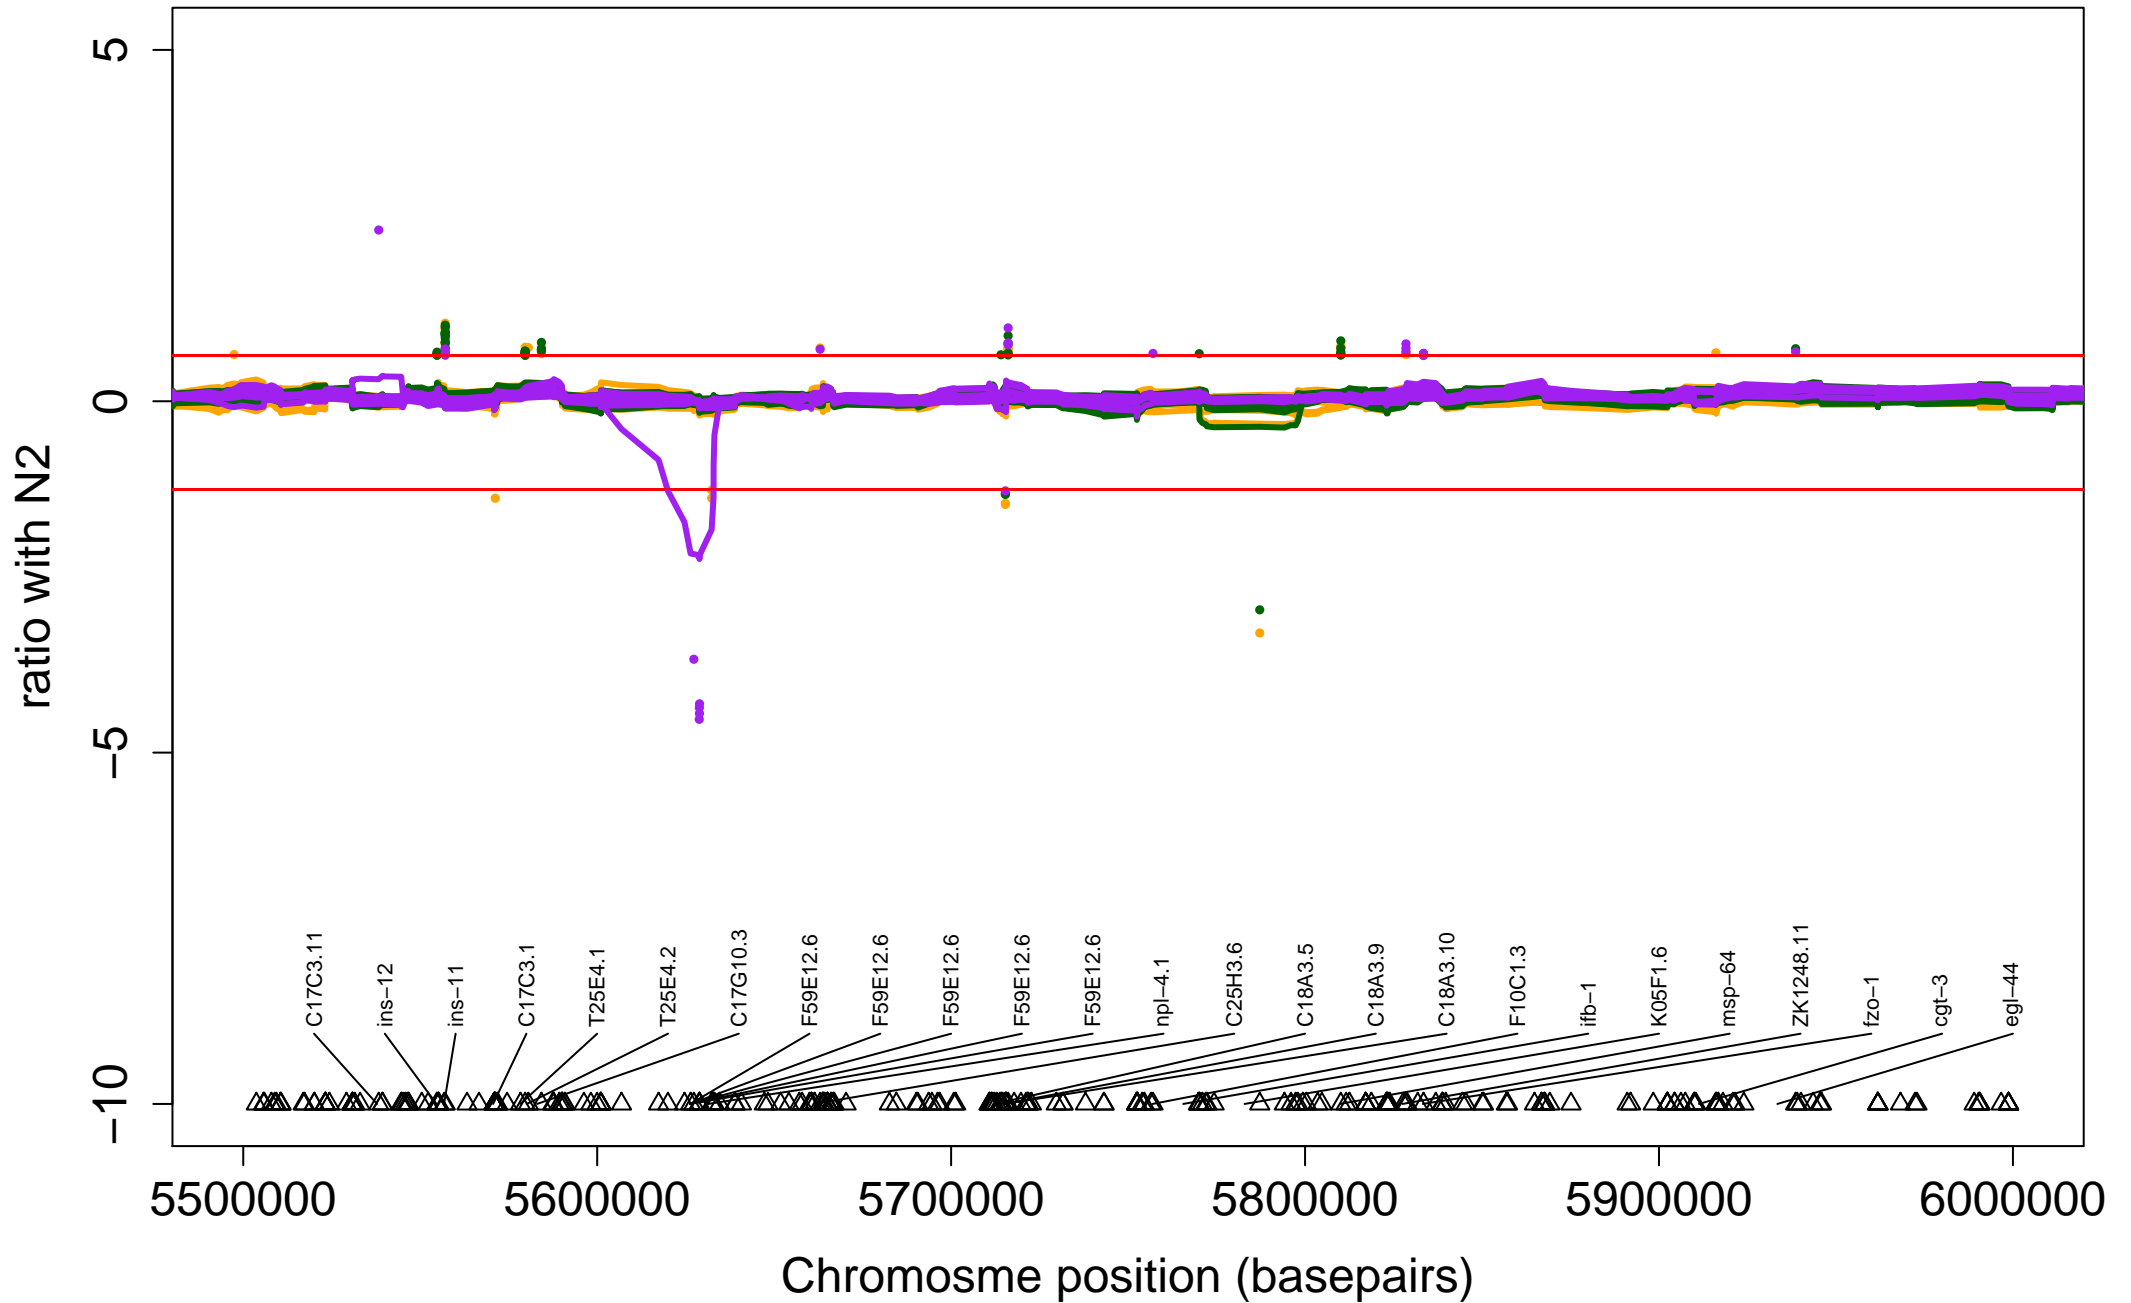

||

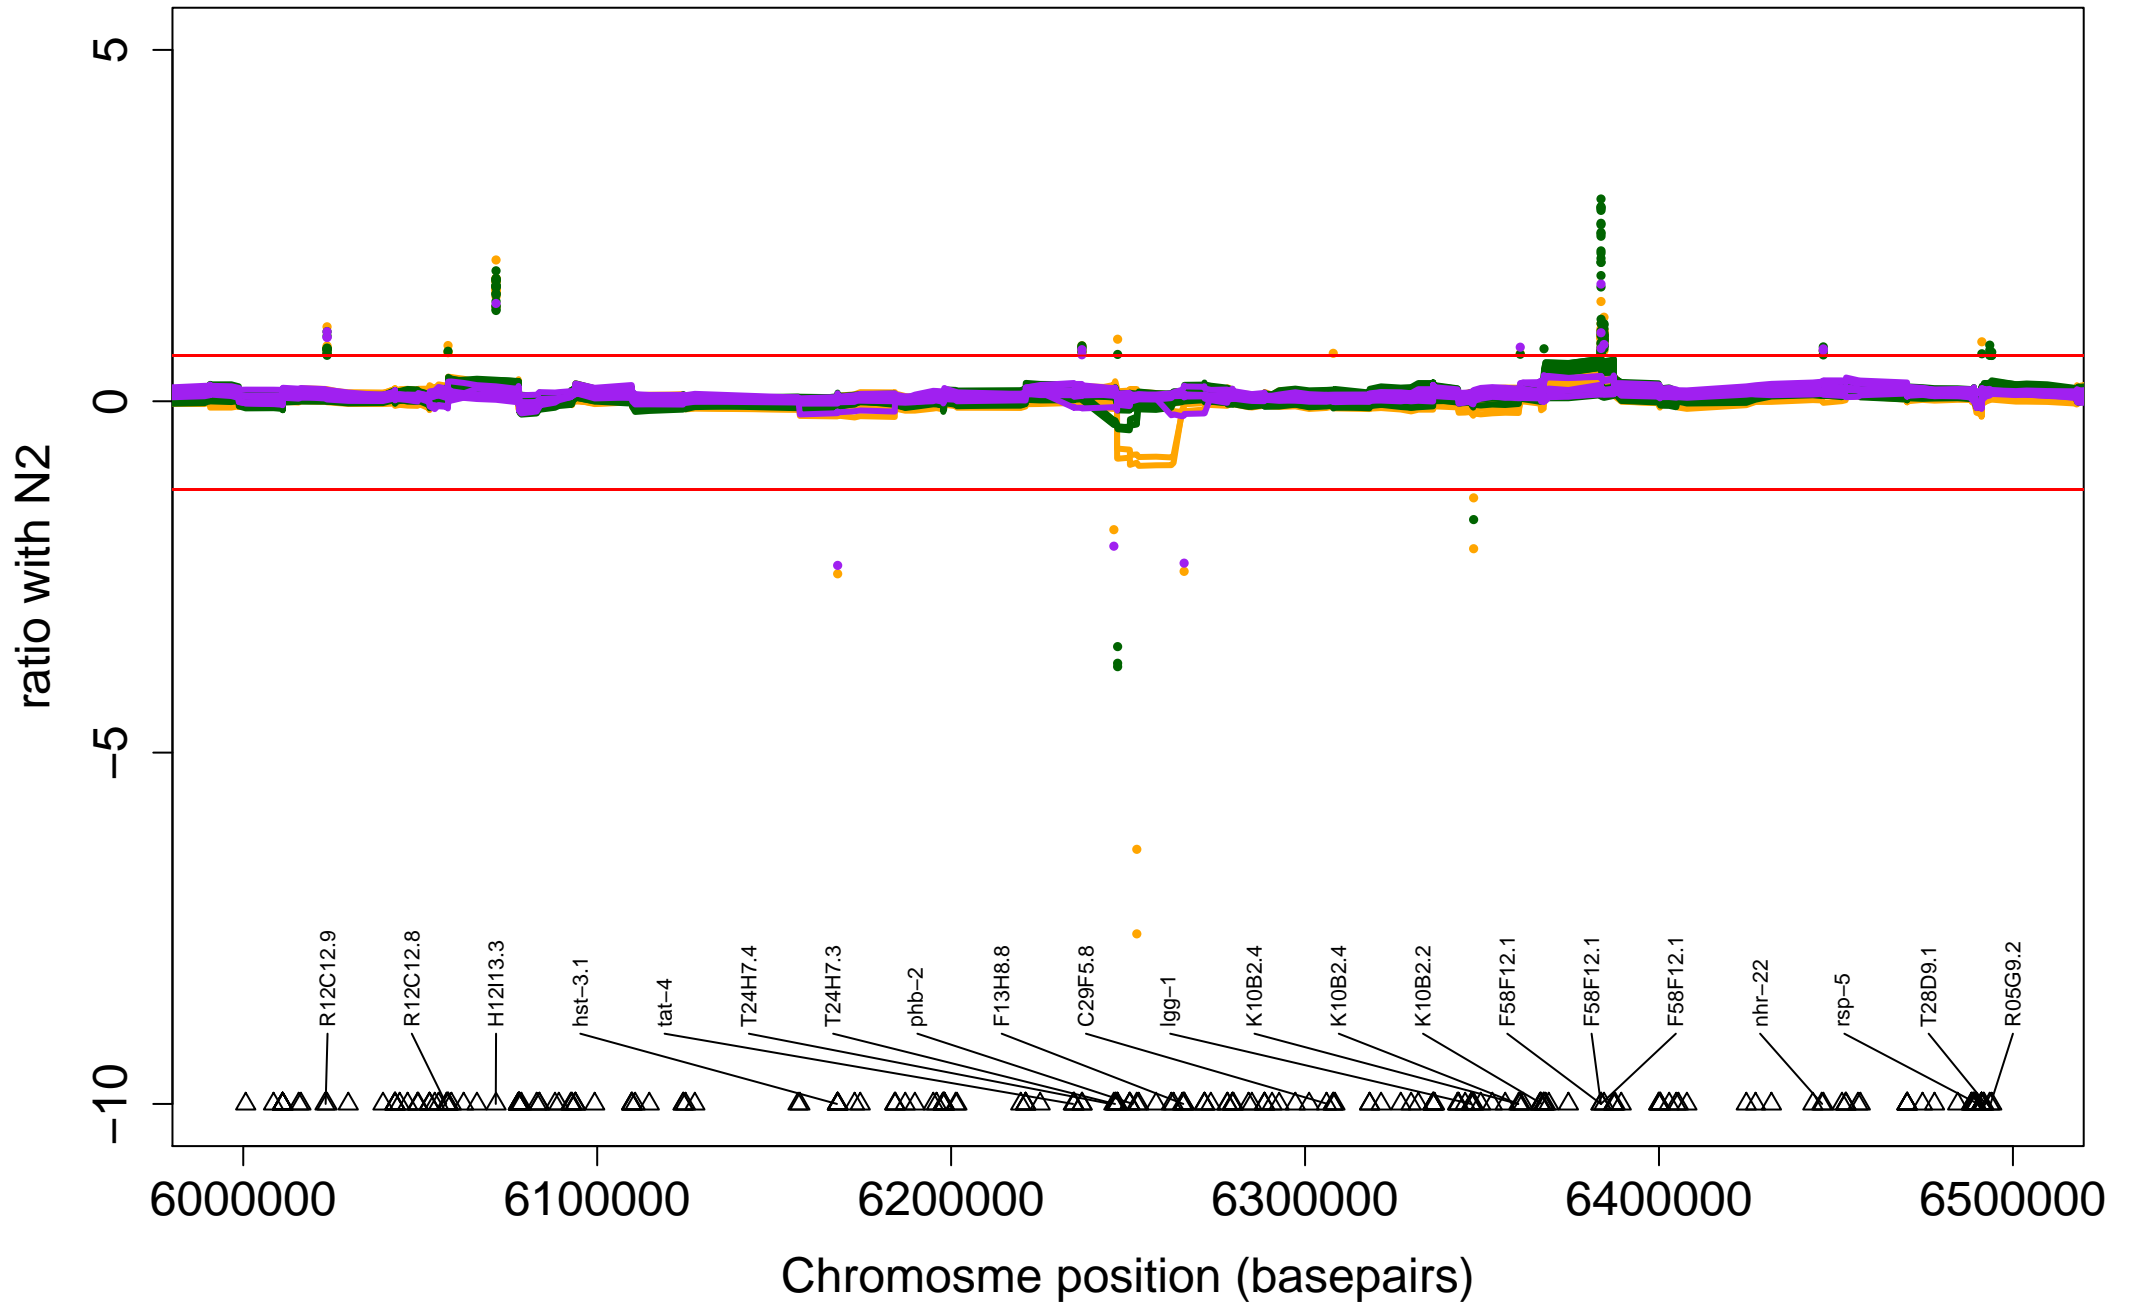

||

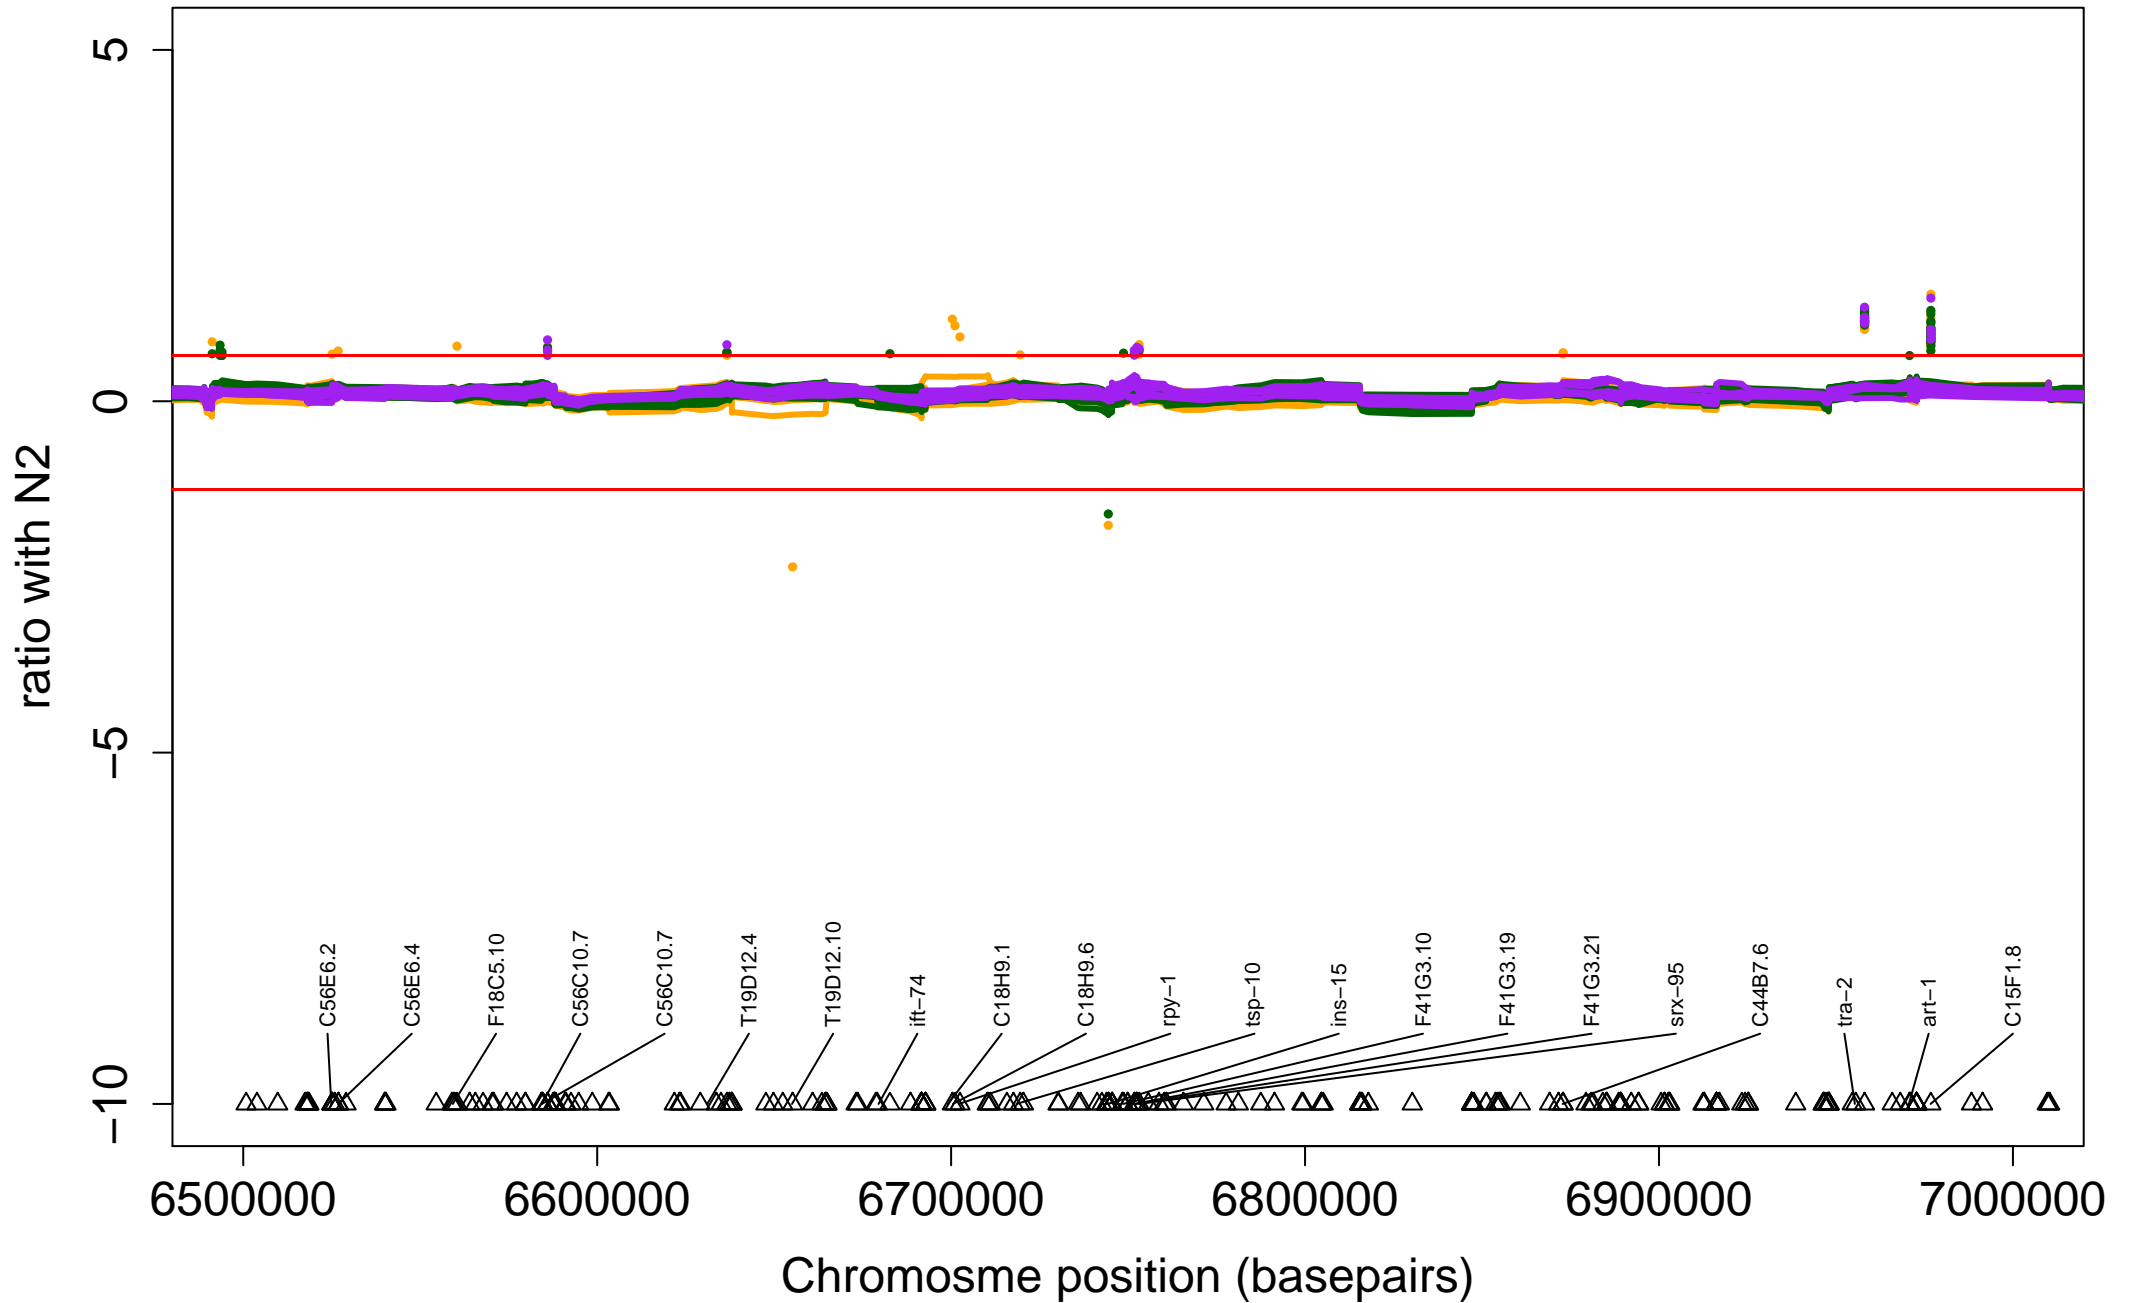

||

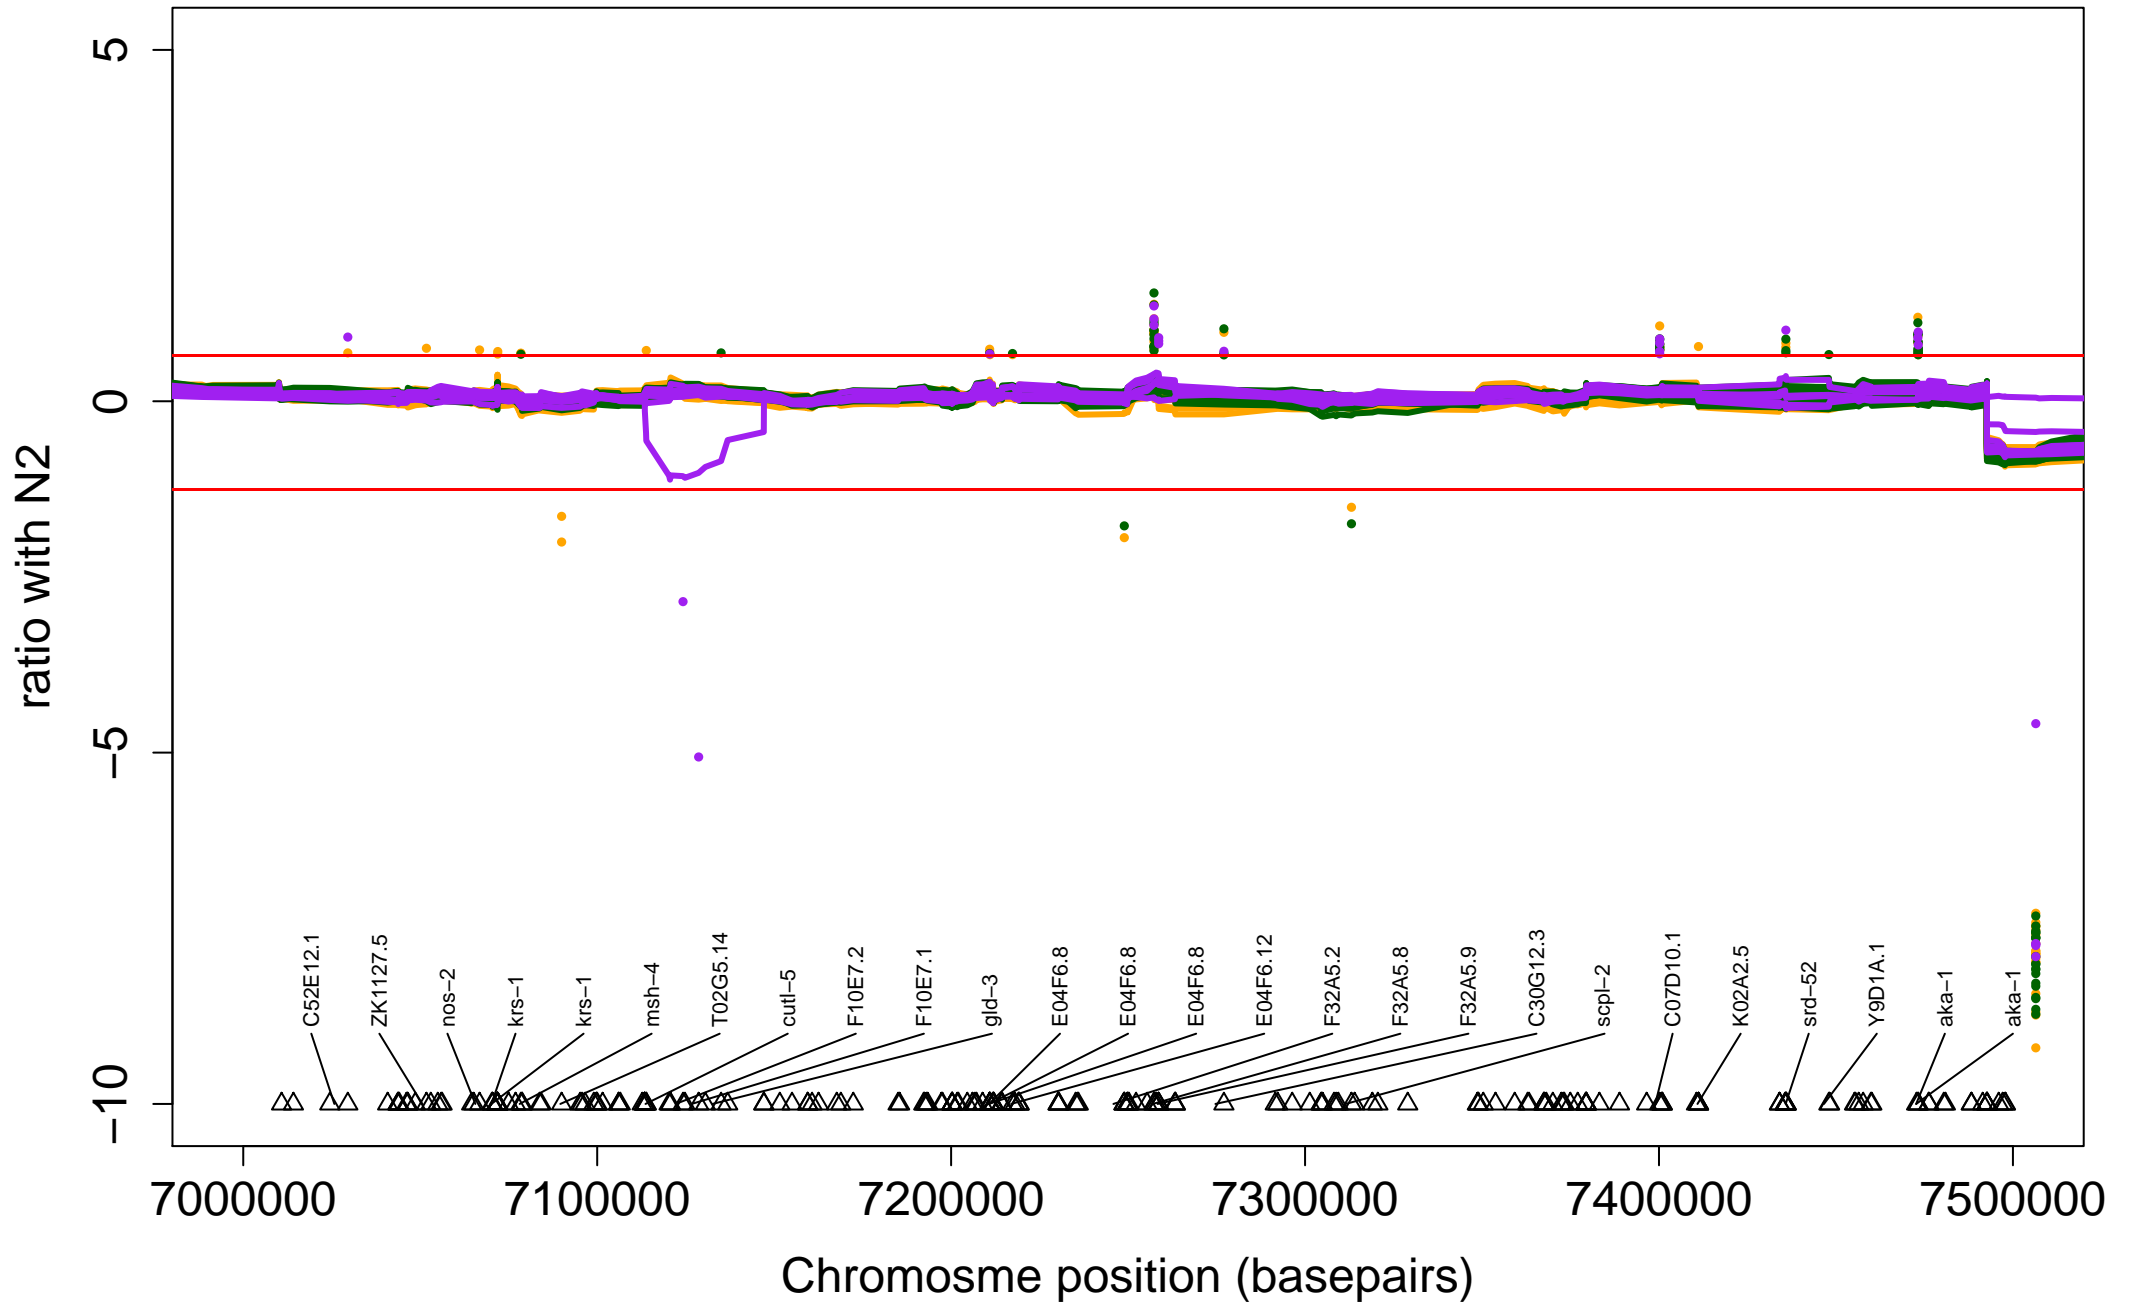

||

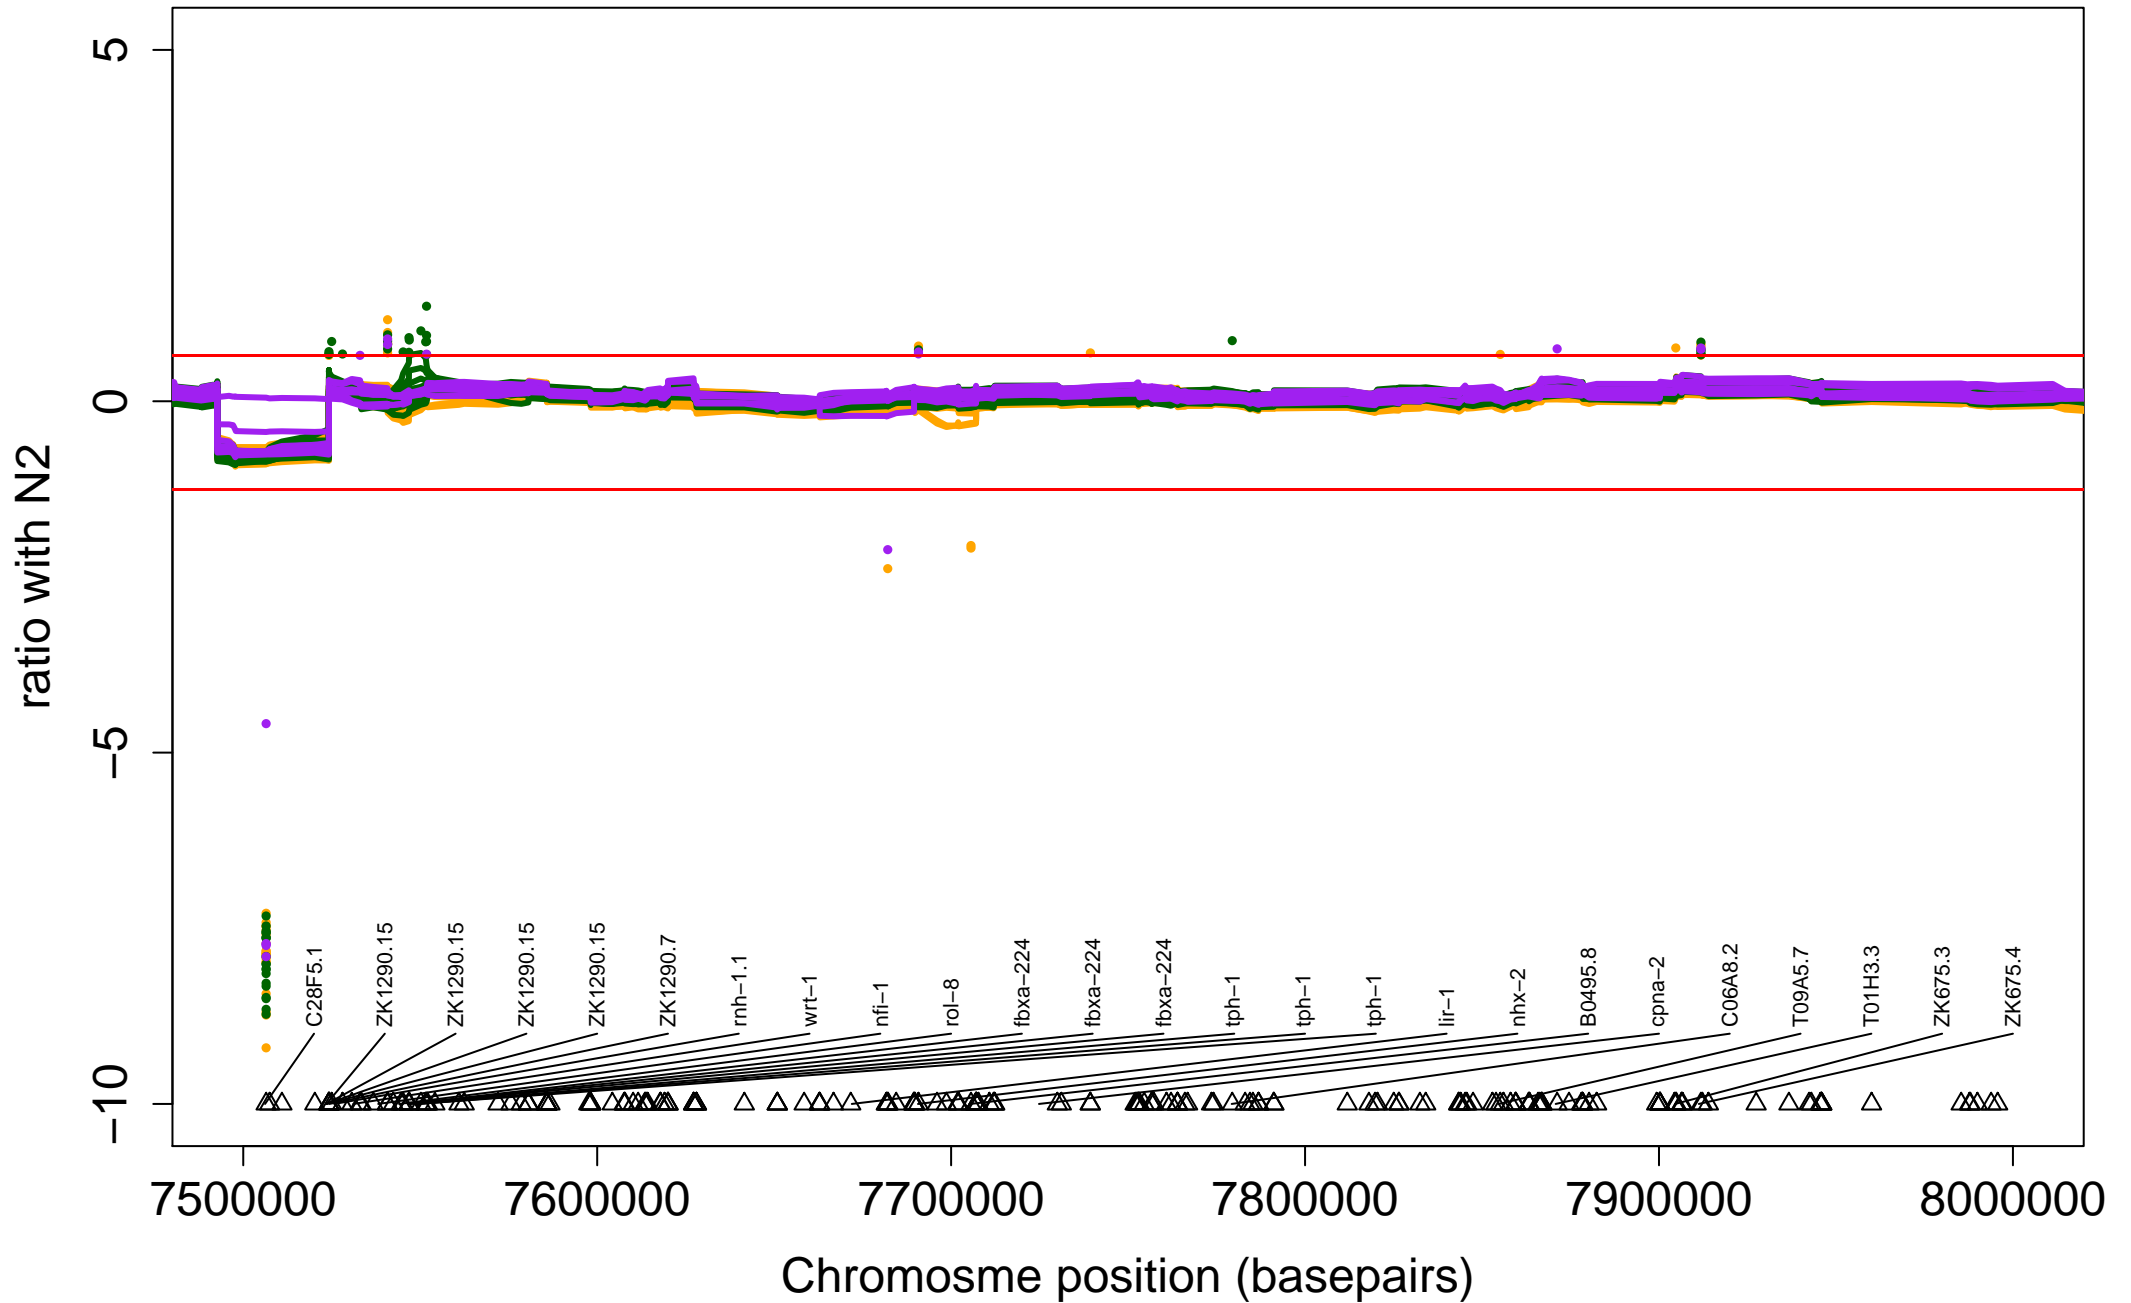

||

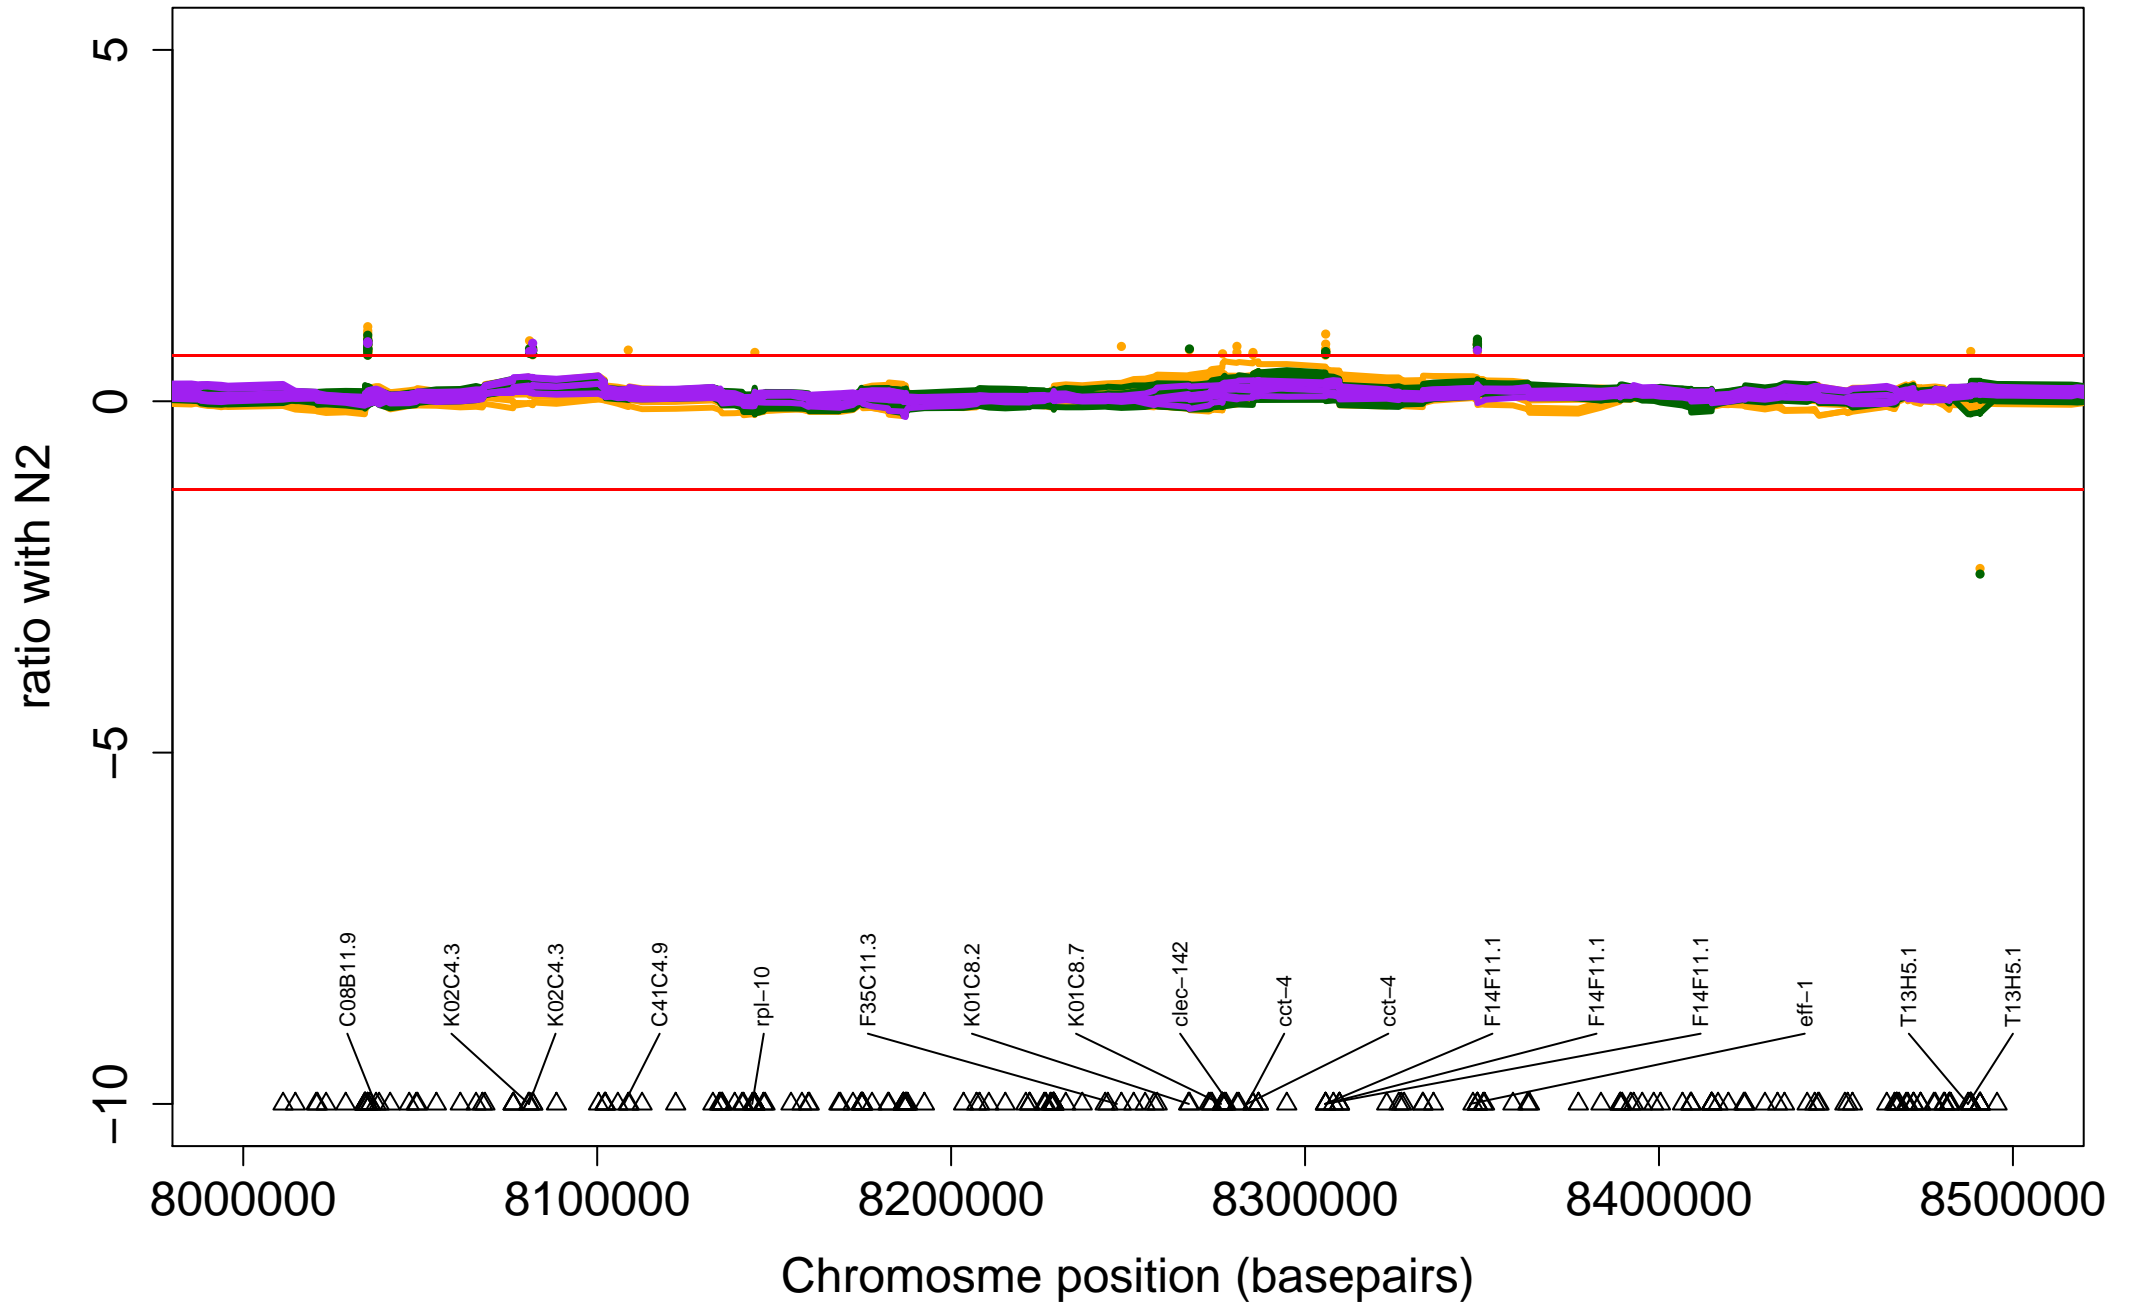



||

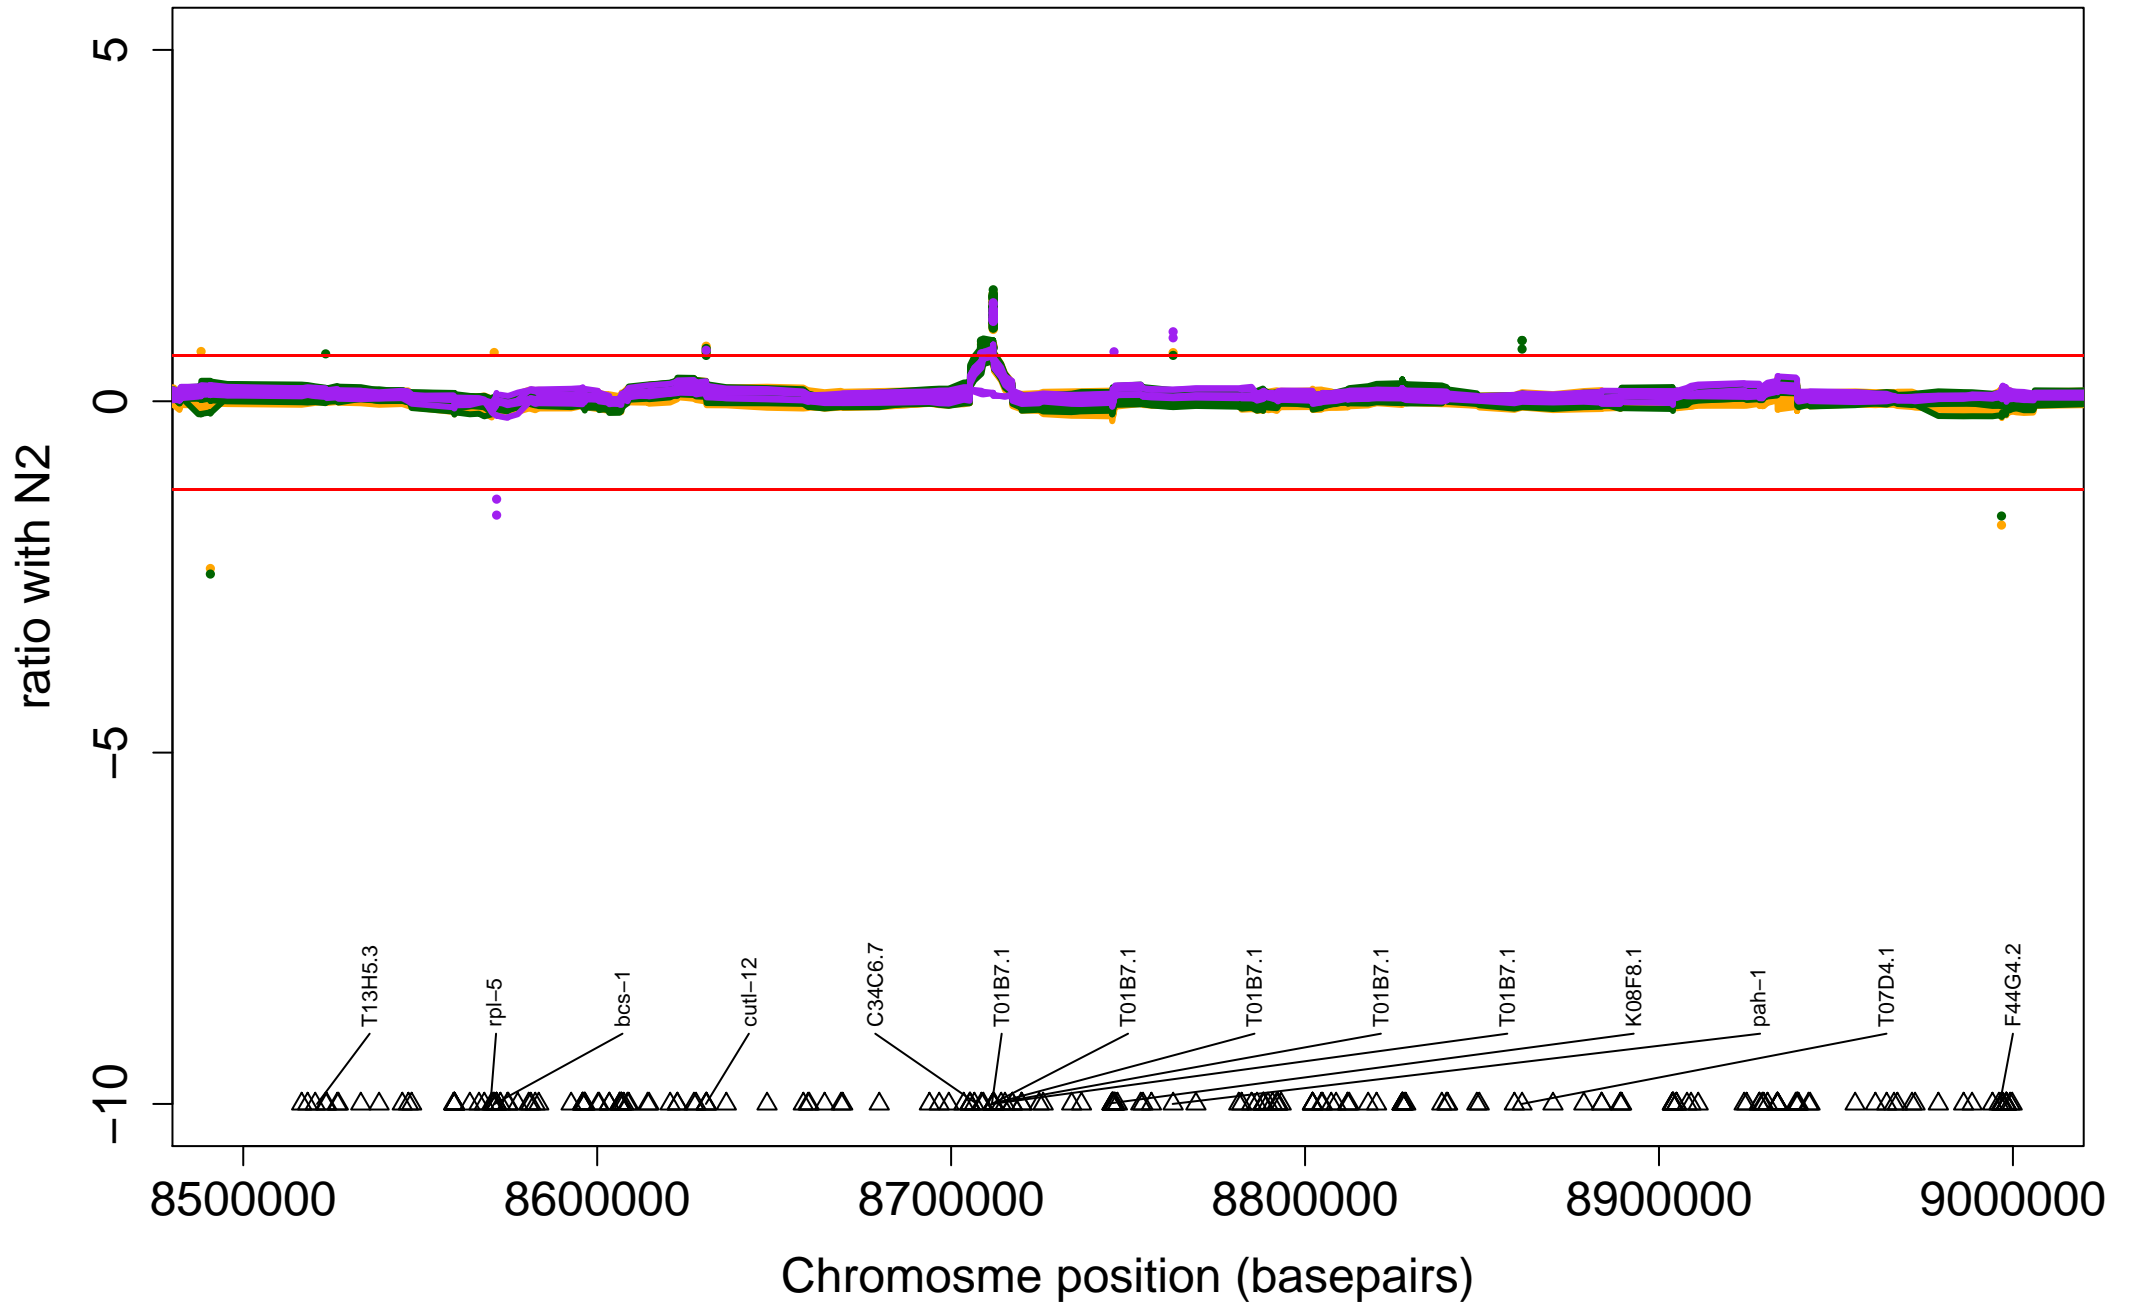

||

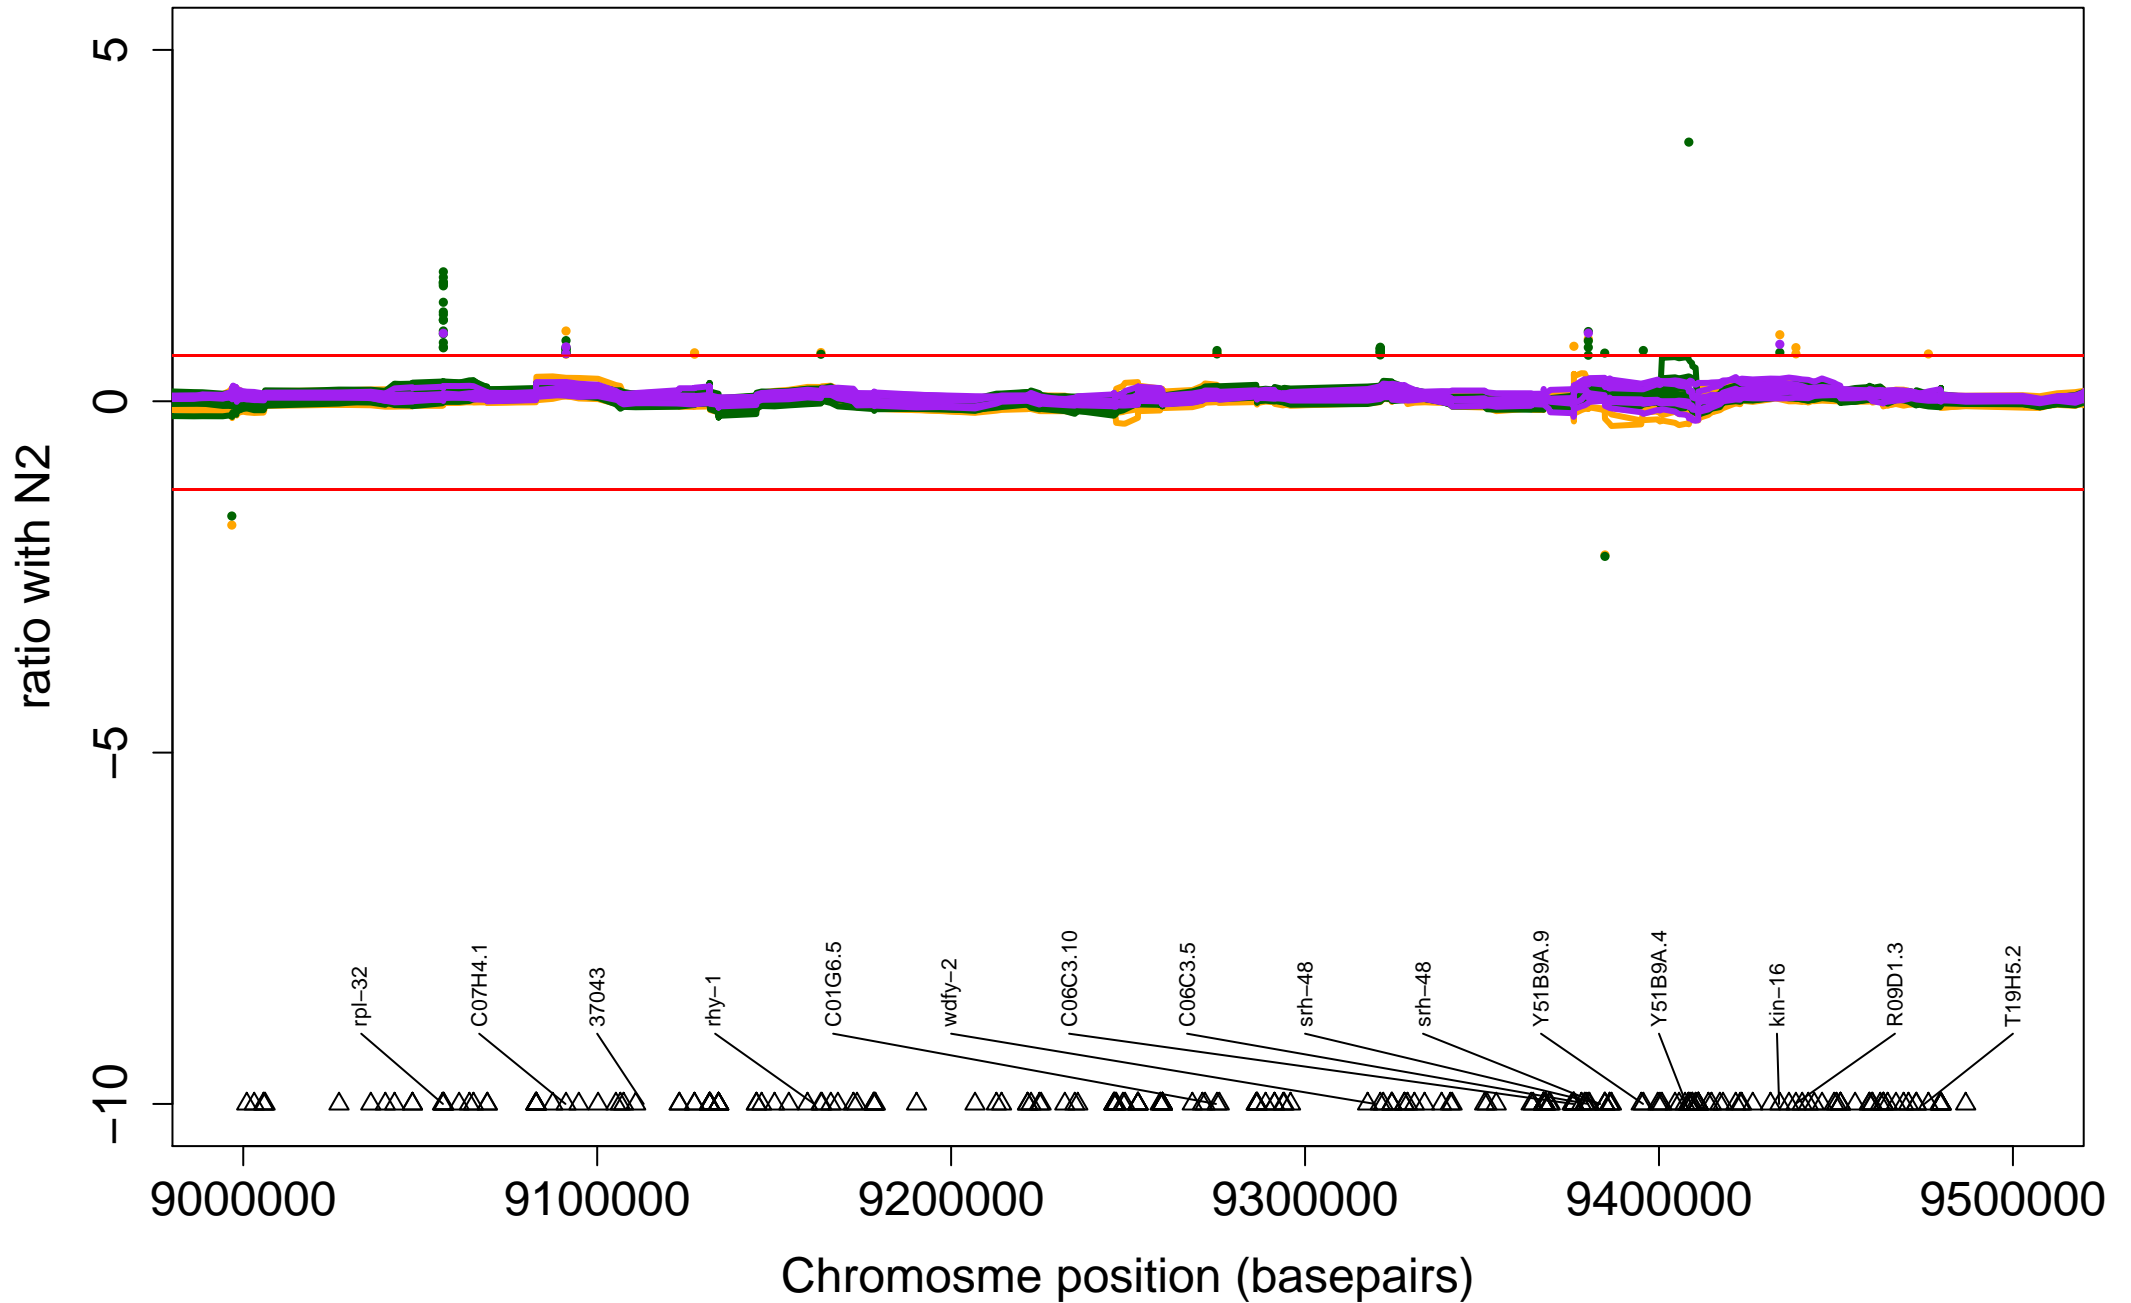

||

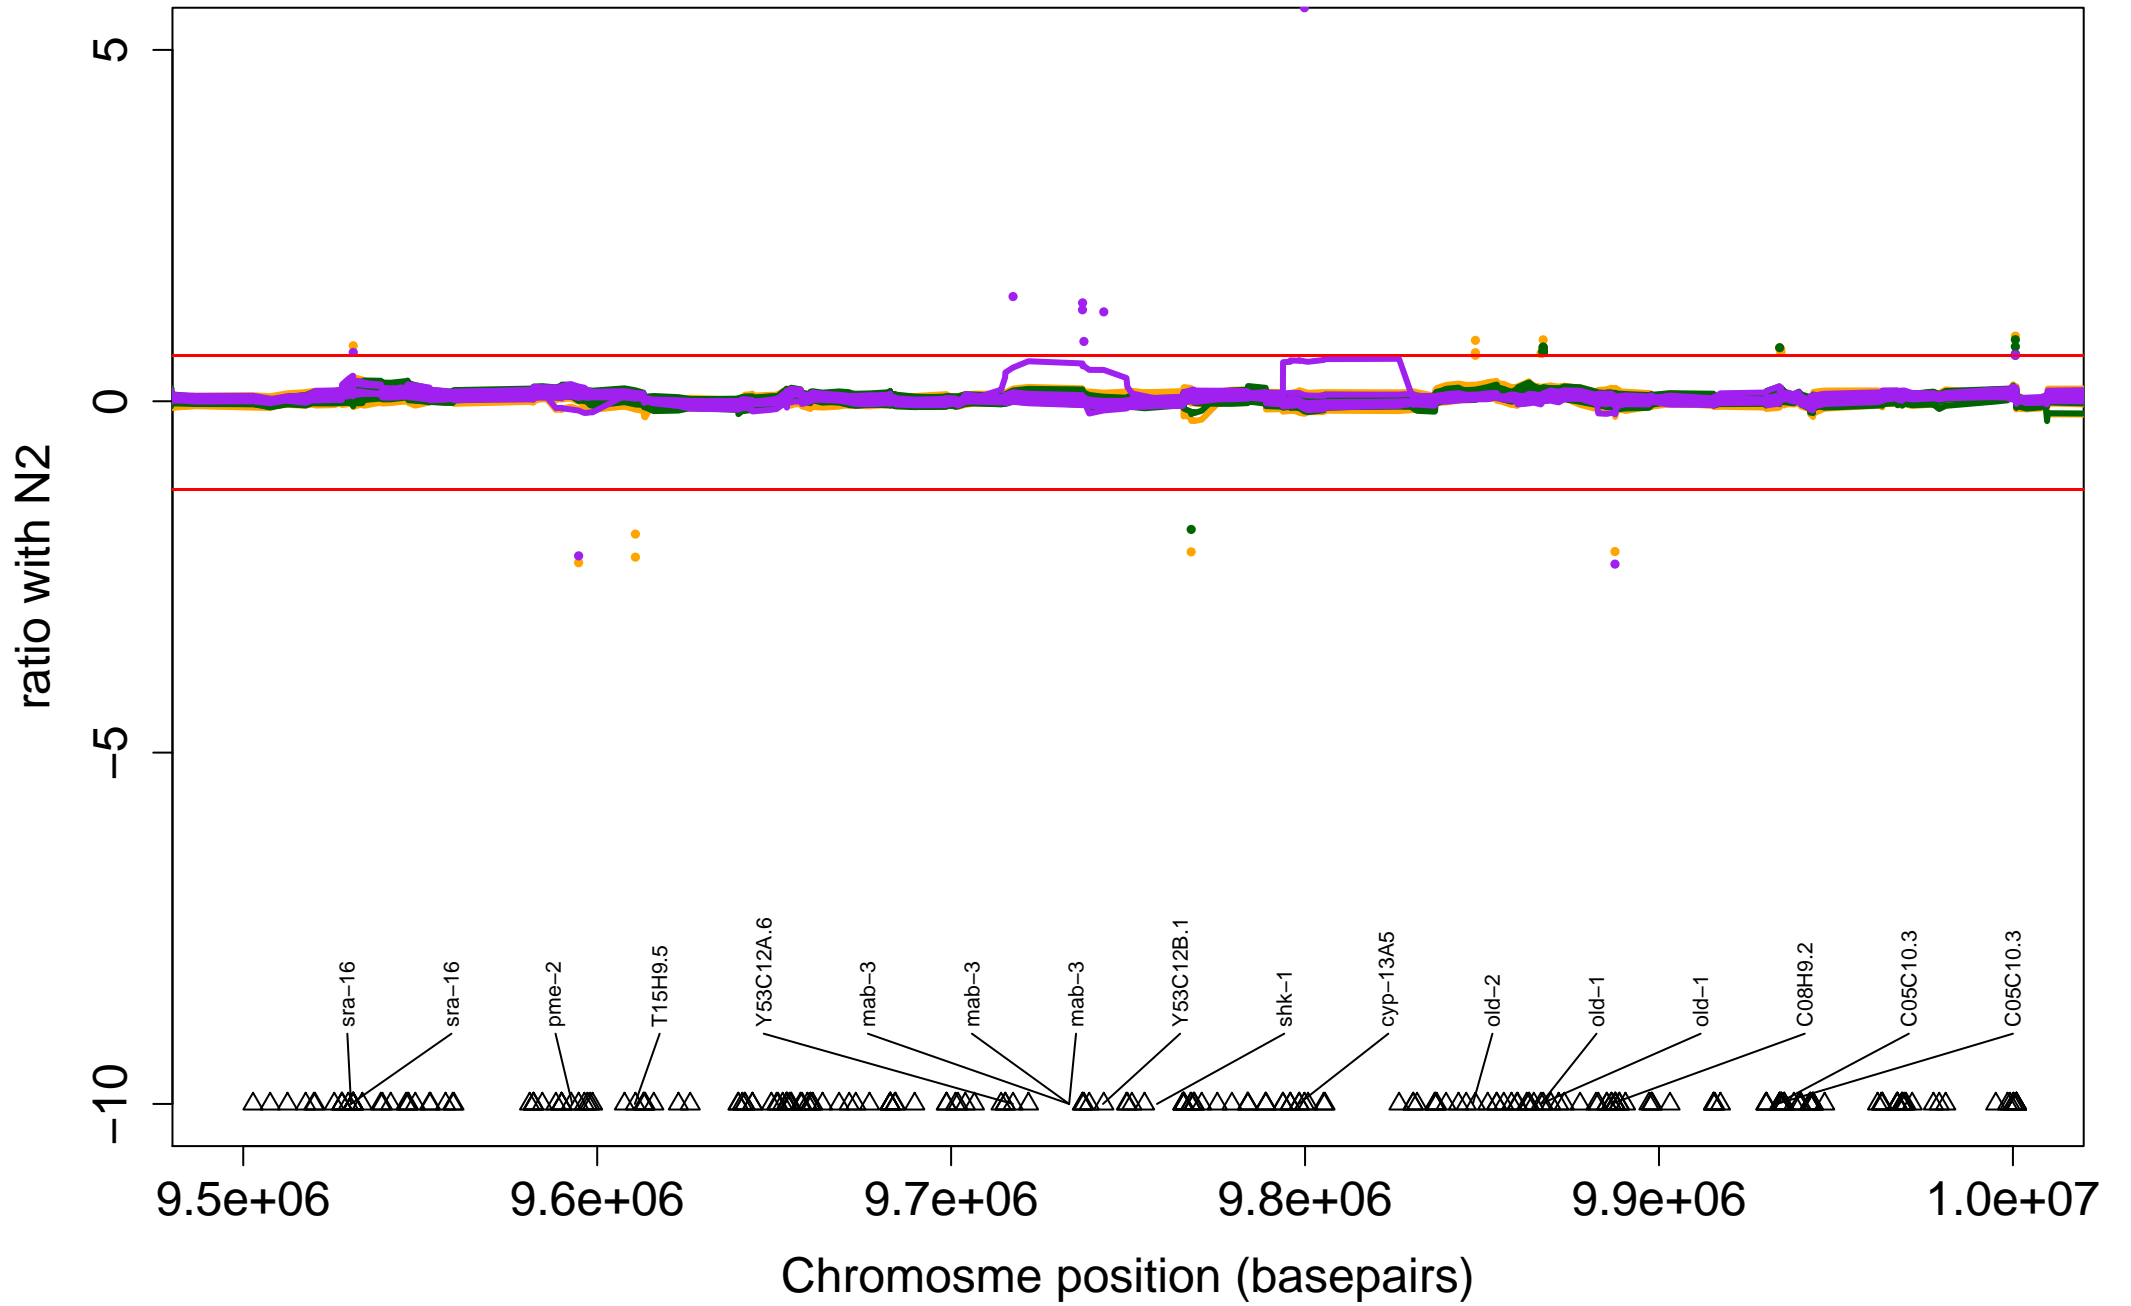

||

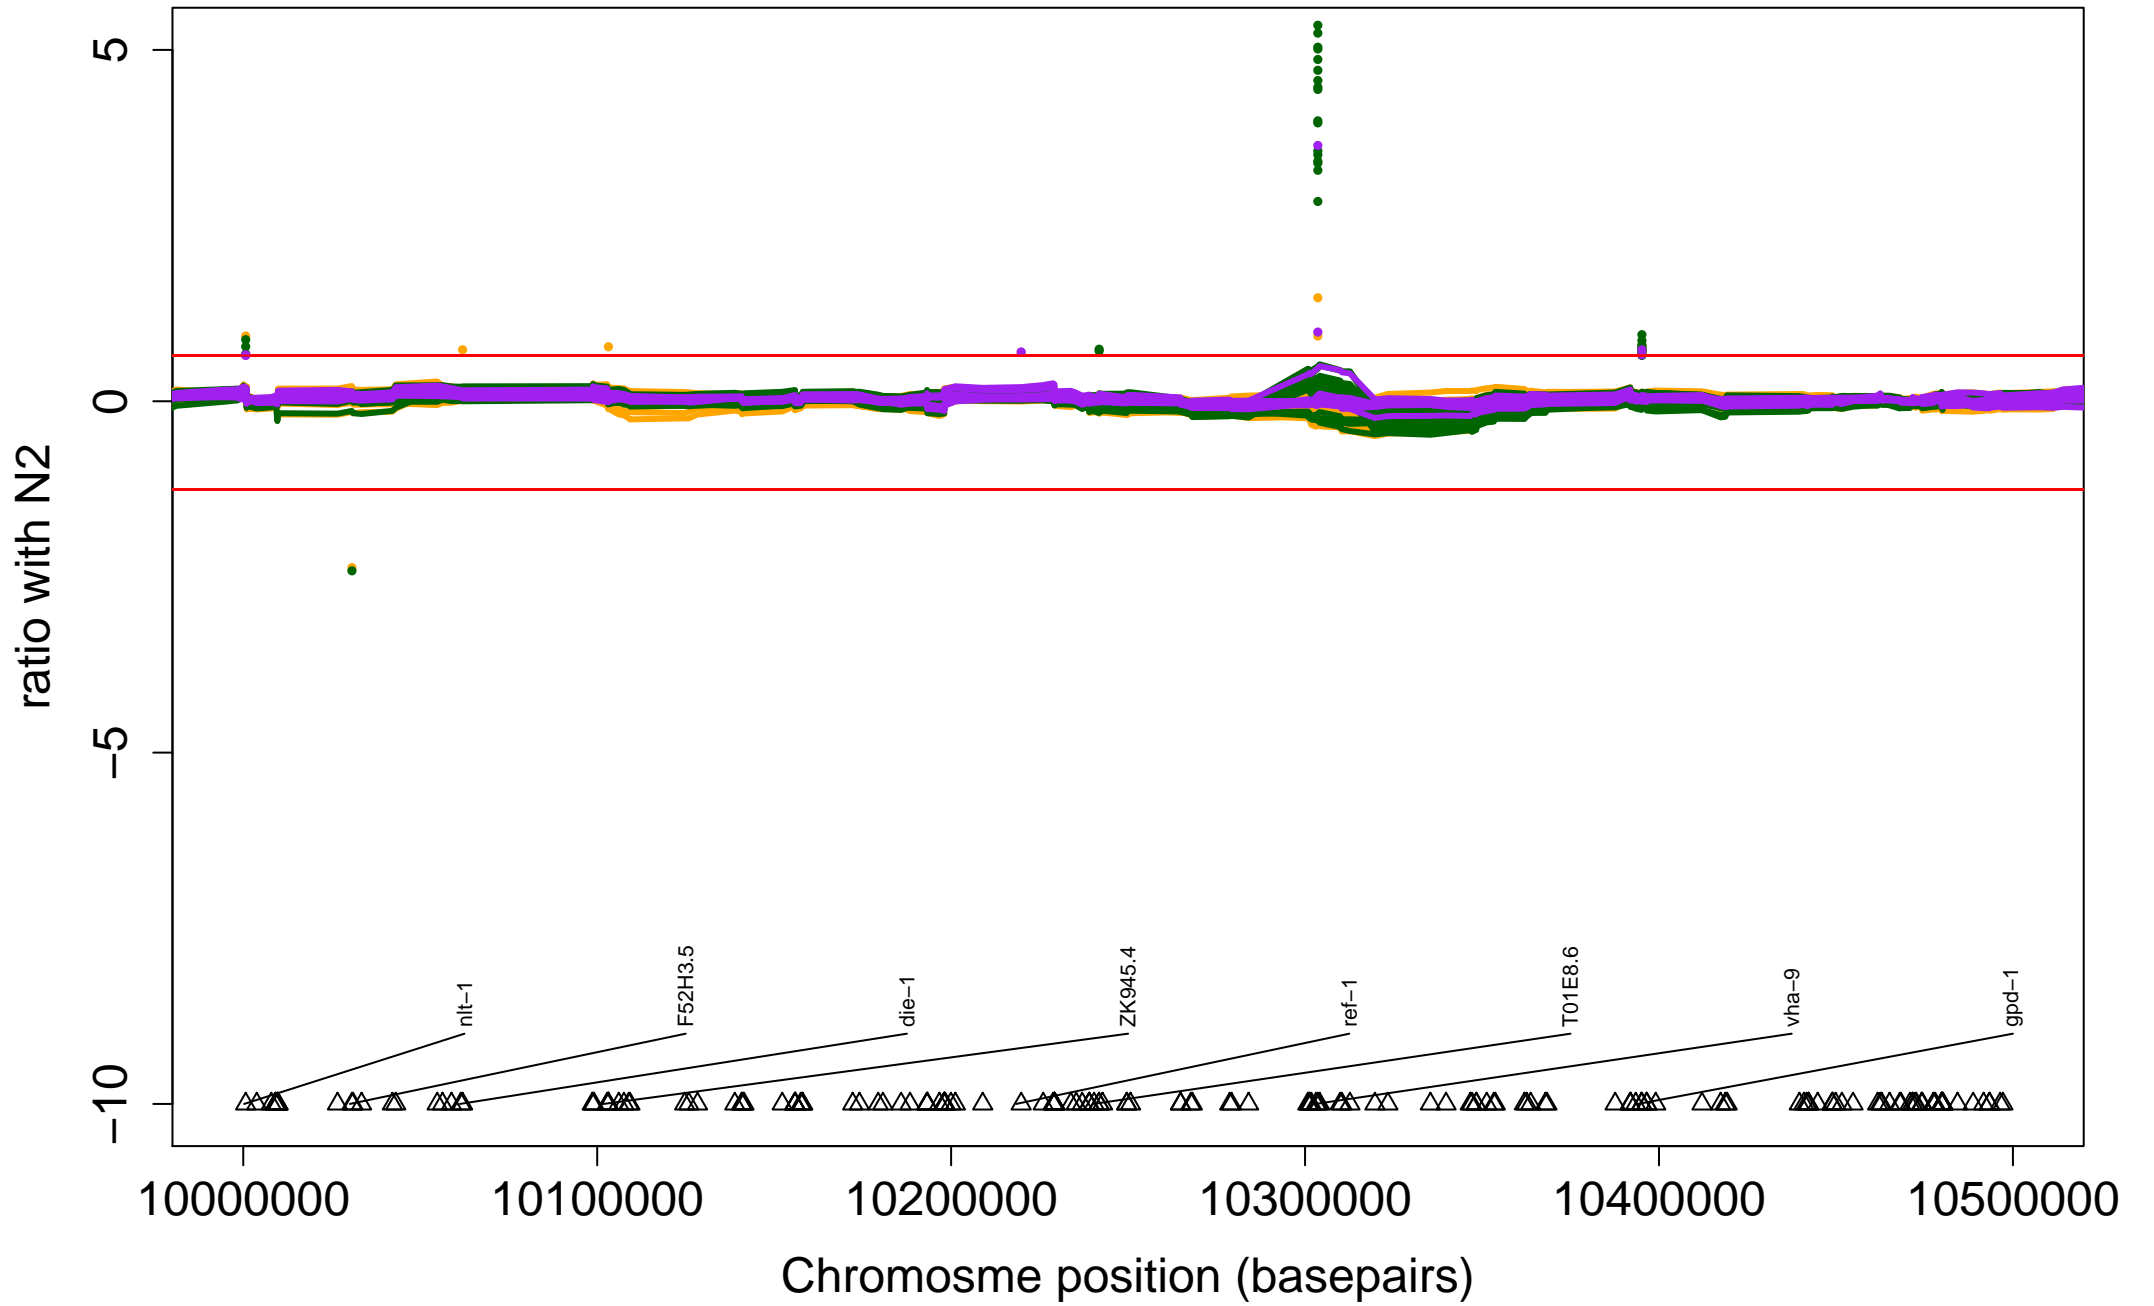

||

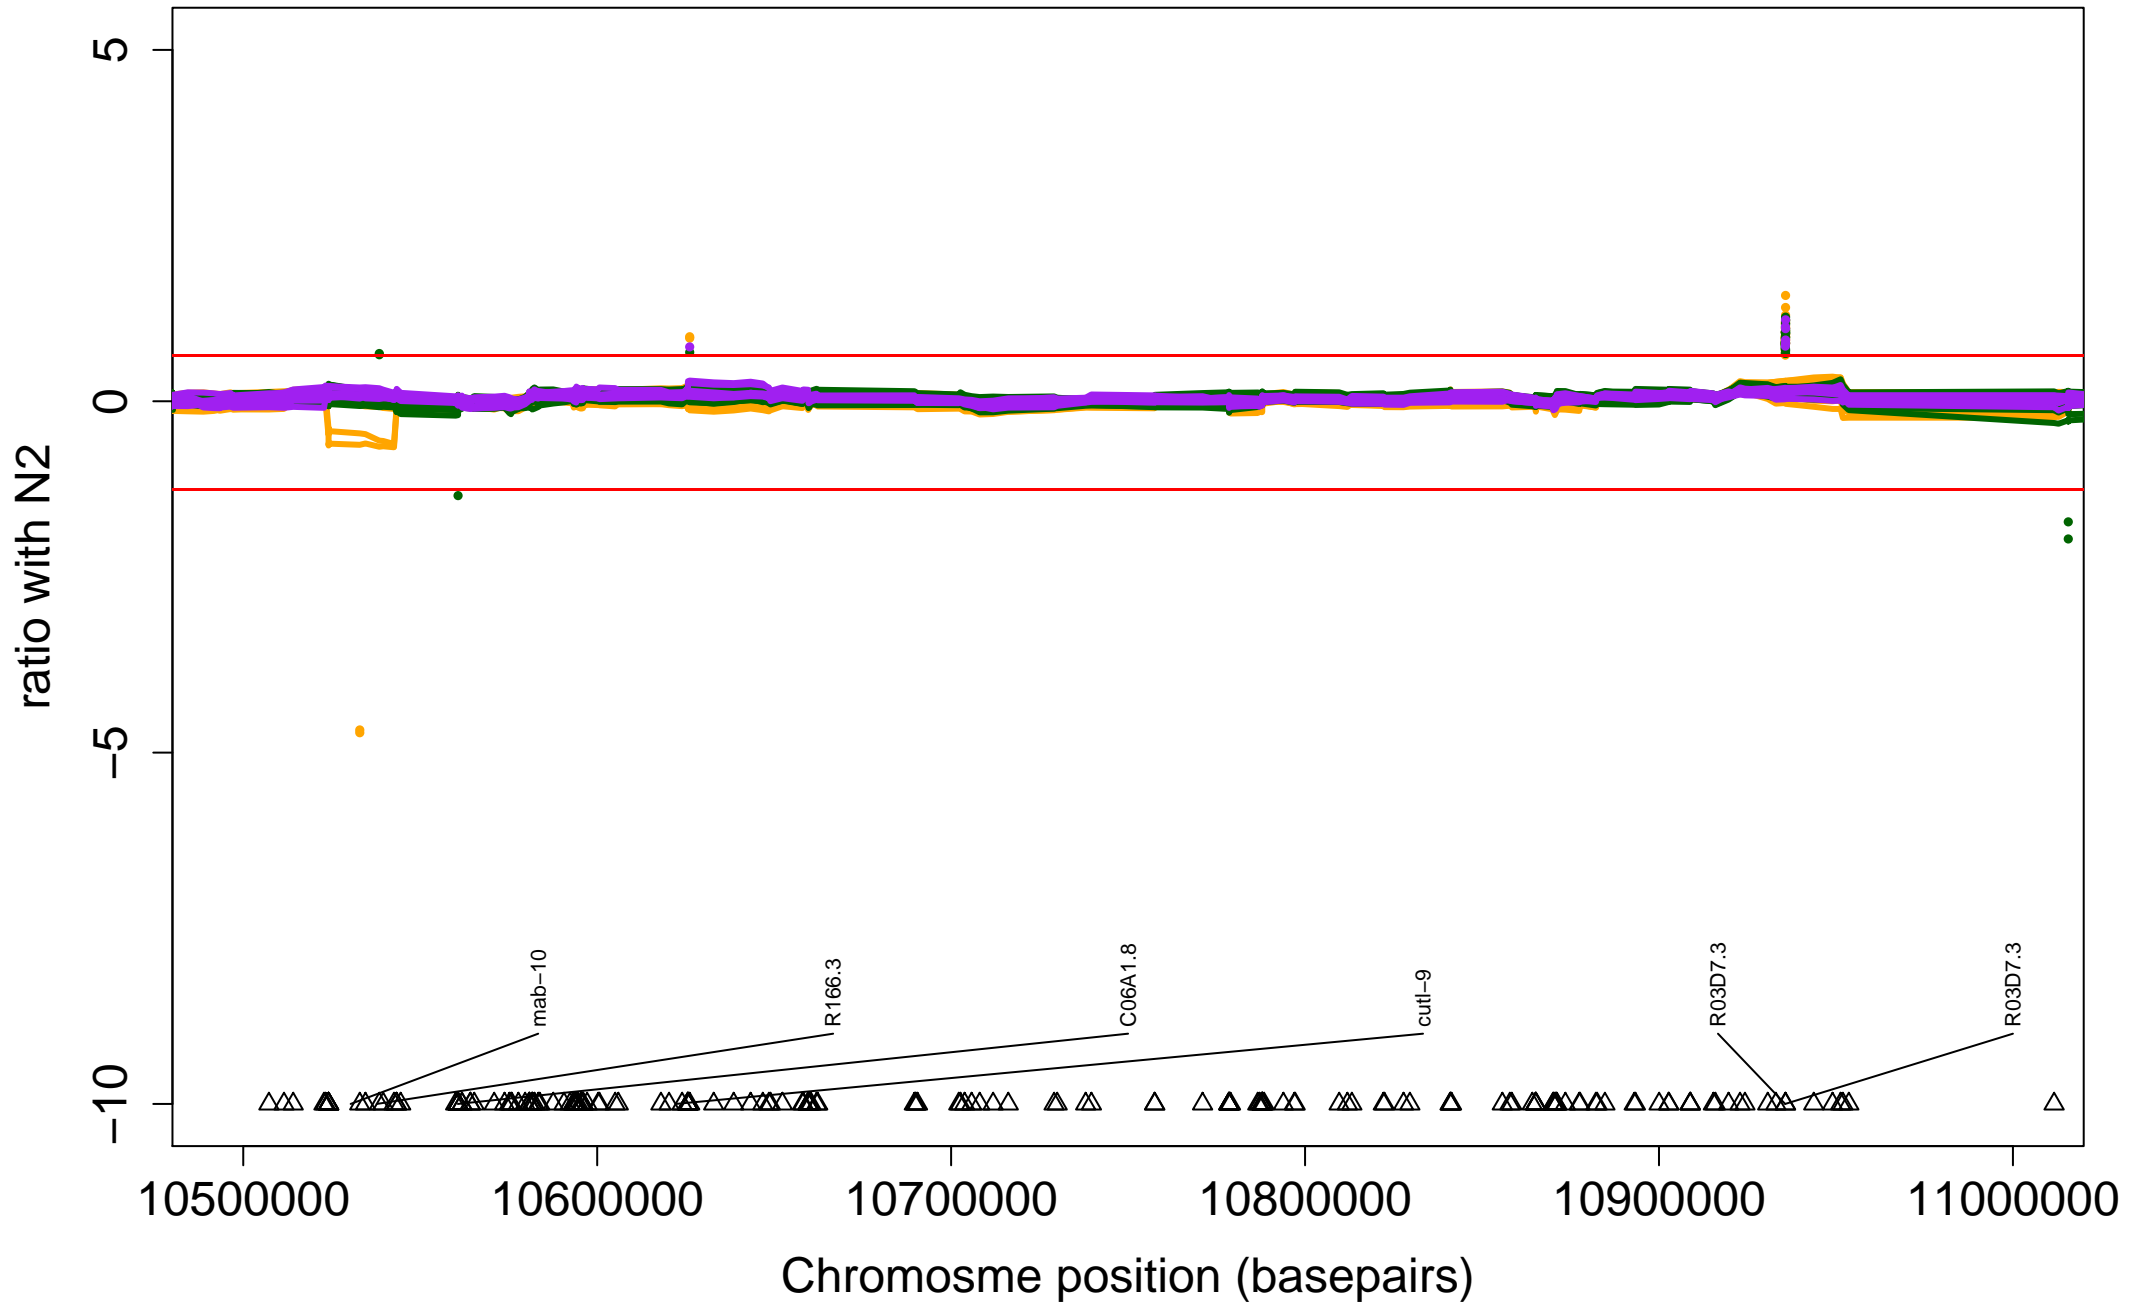

||

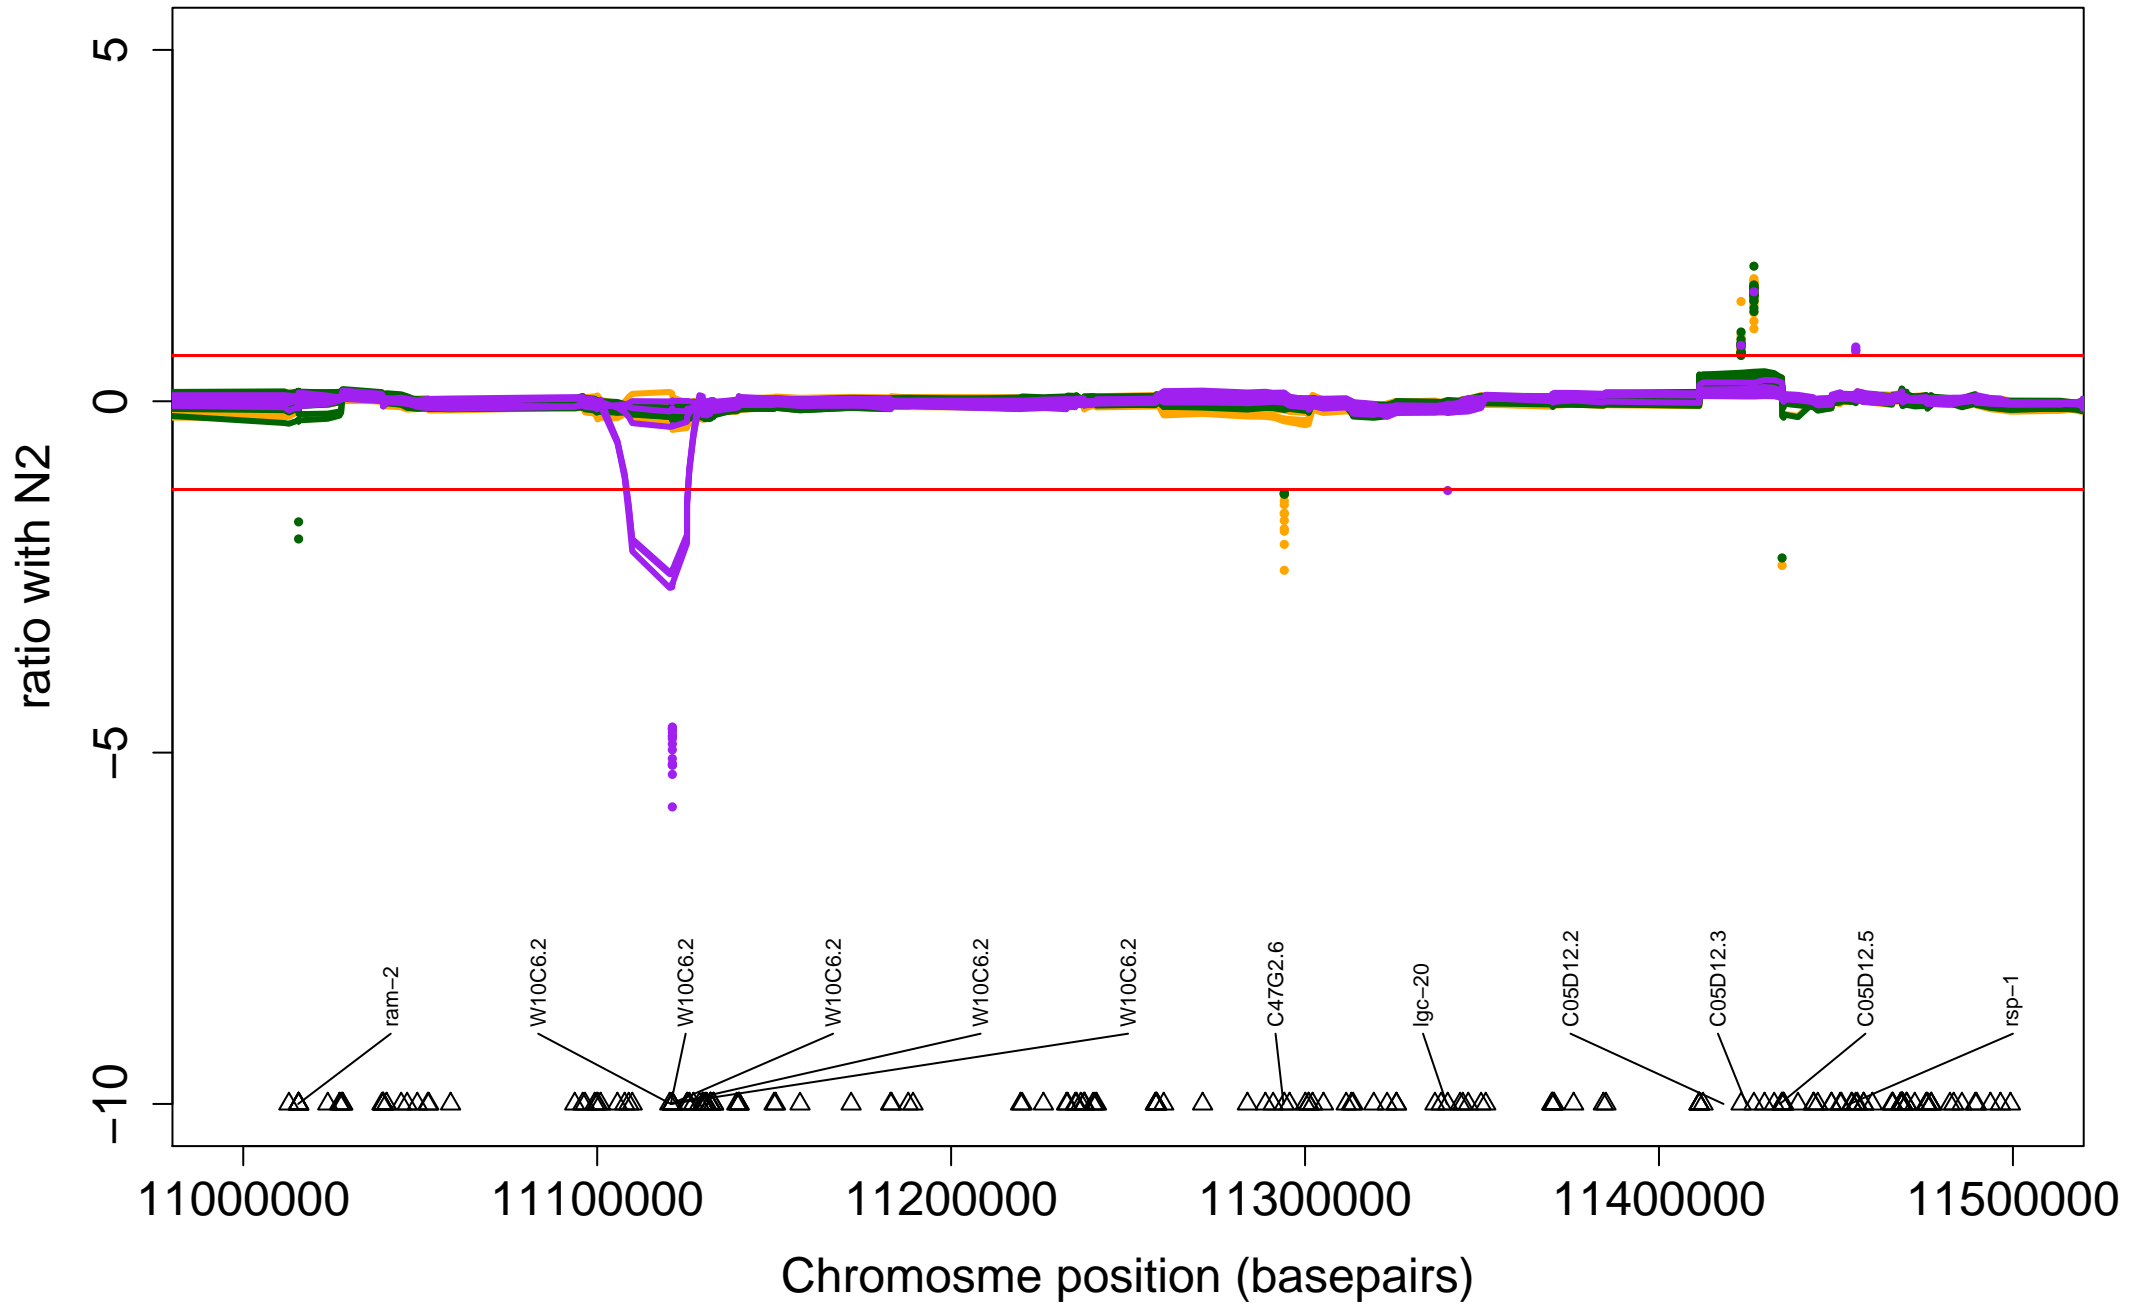

||

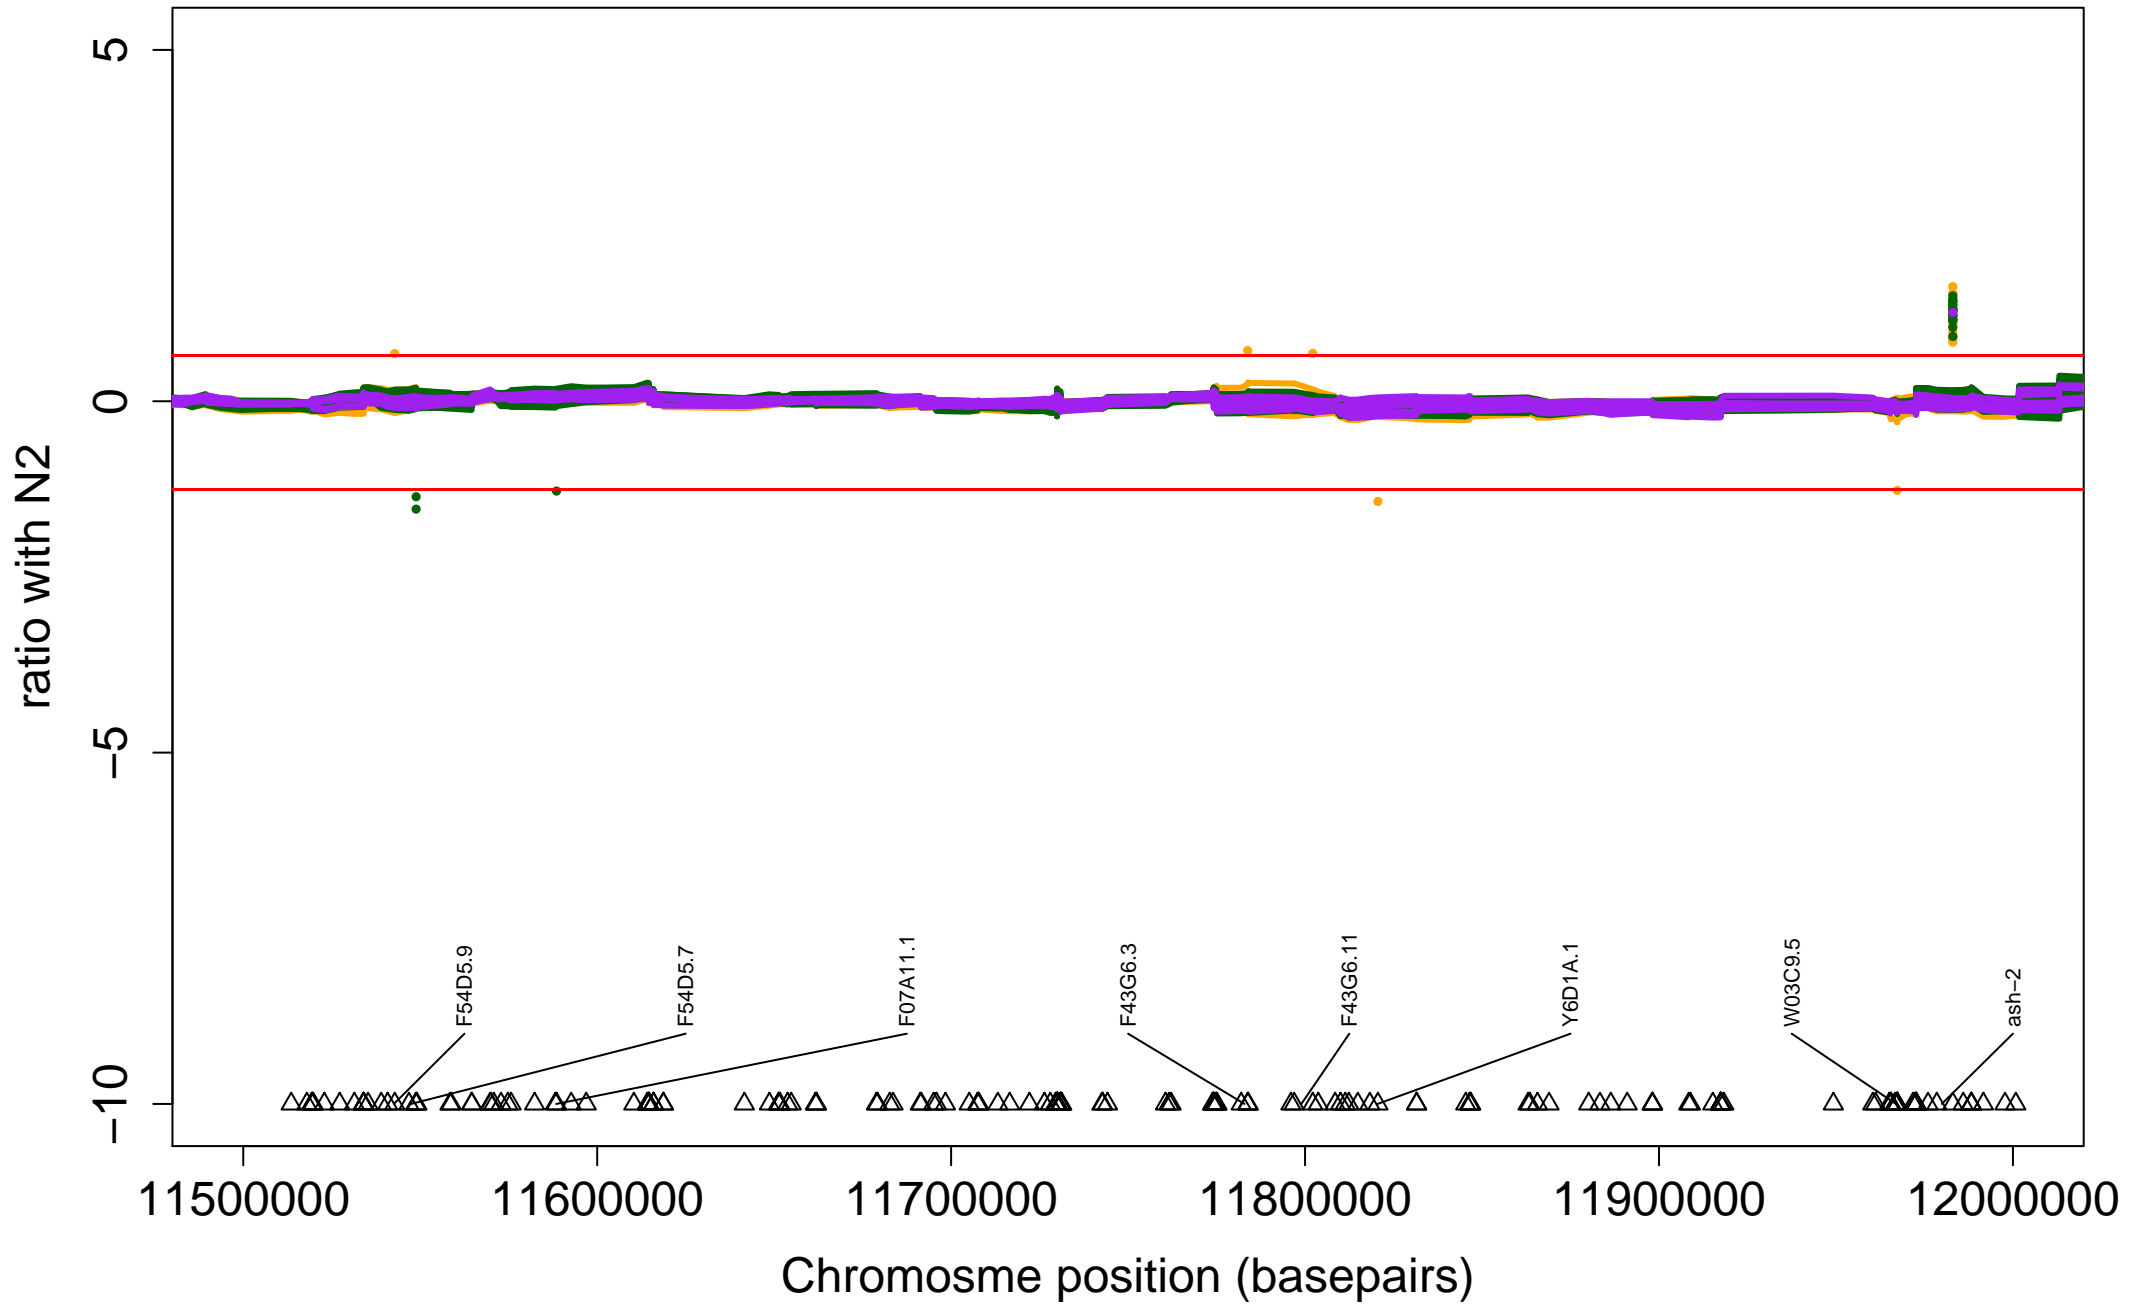

||

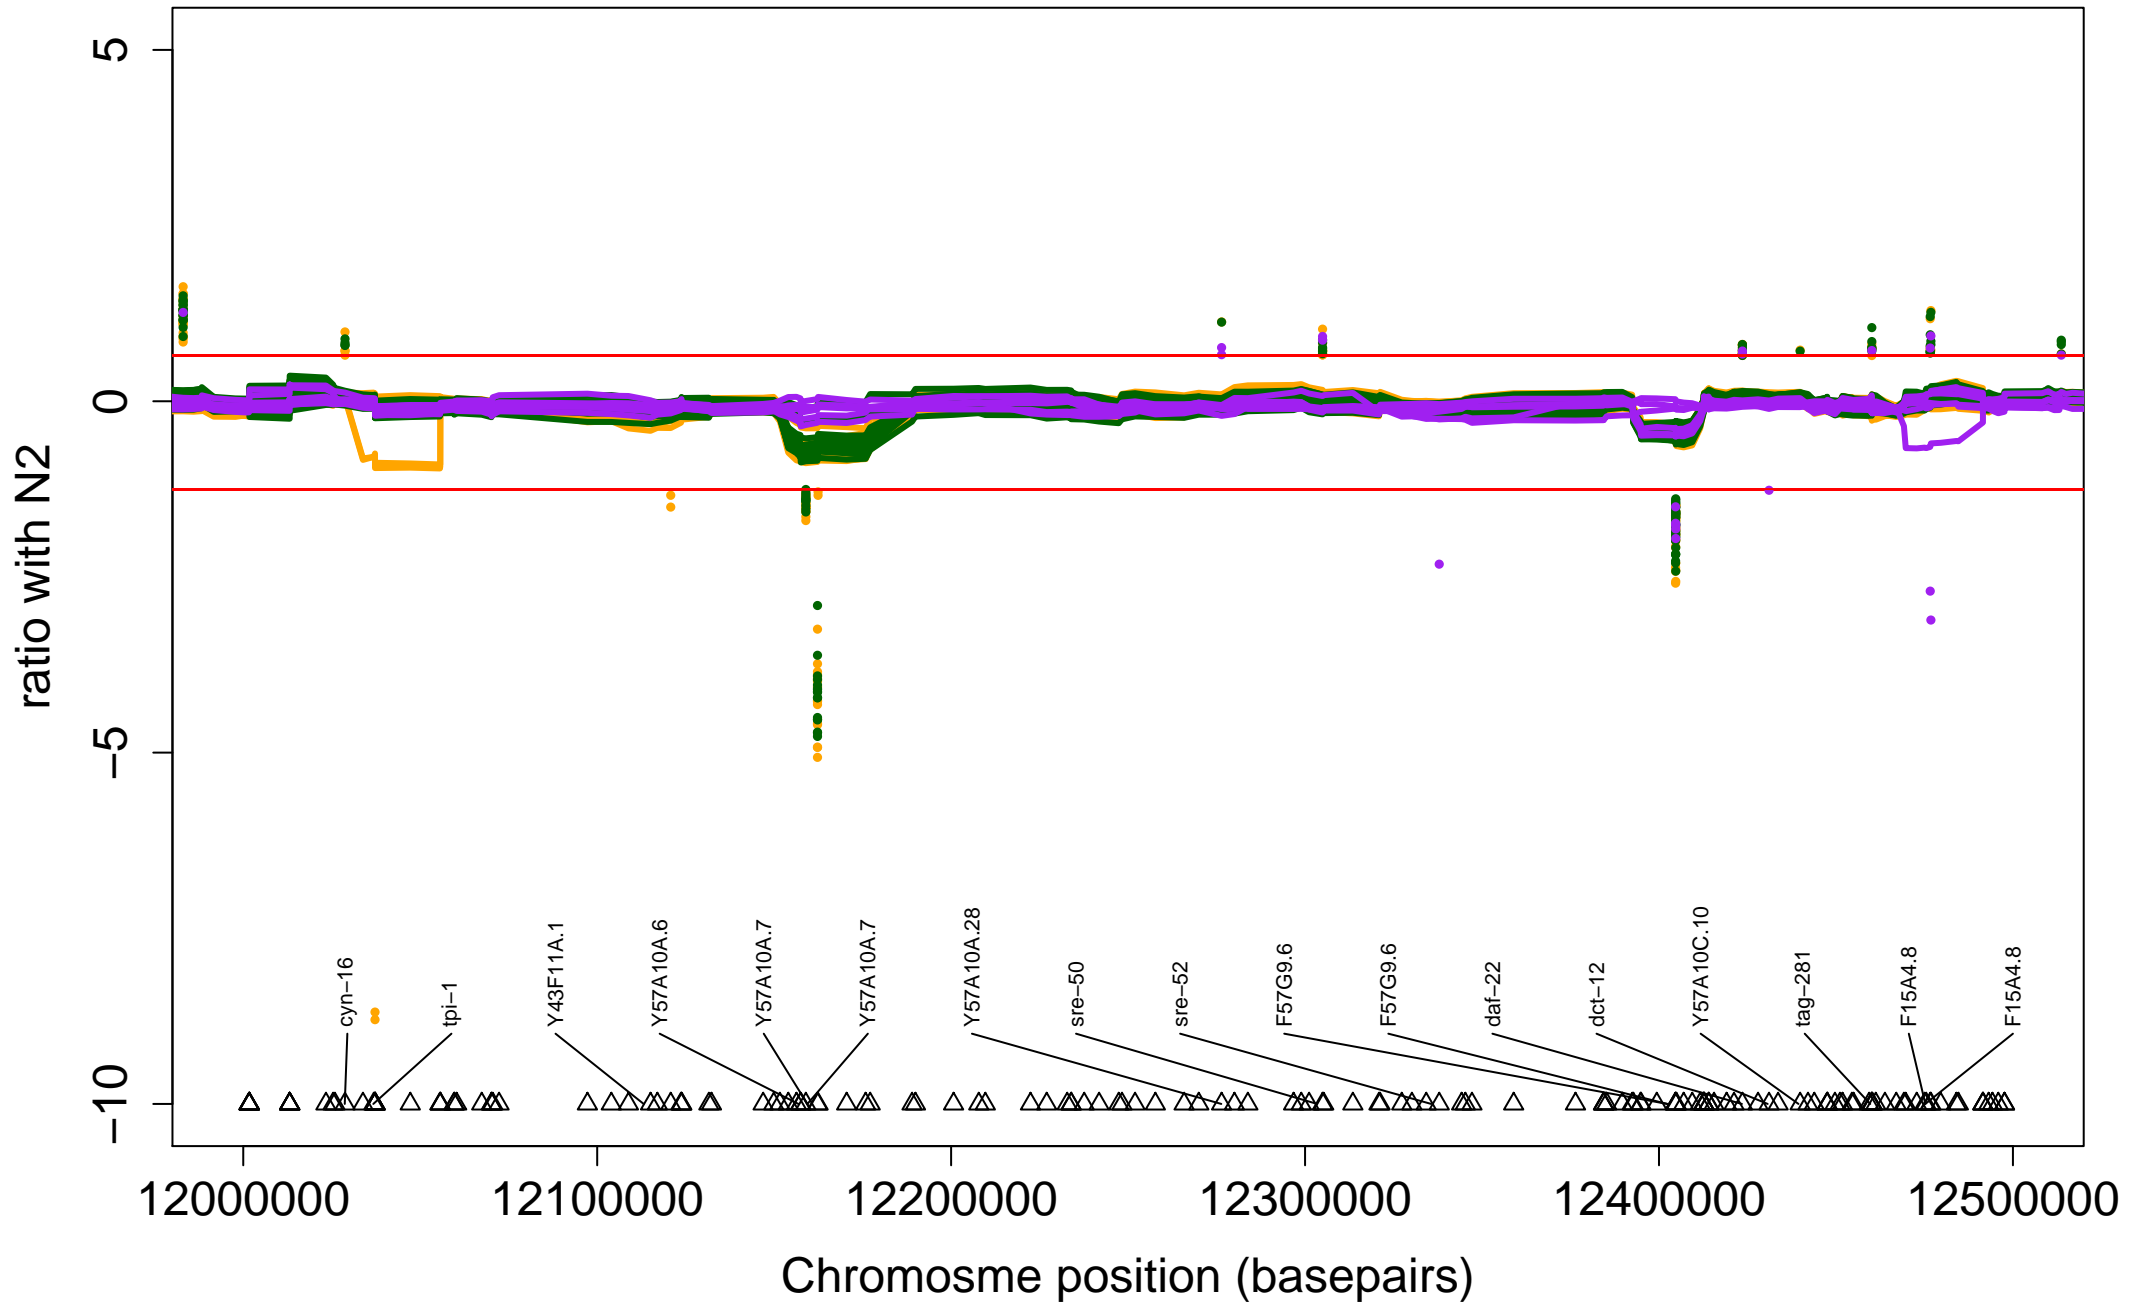



||

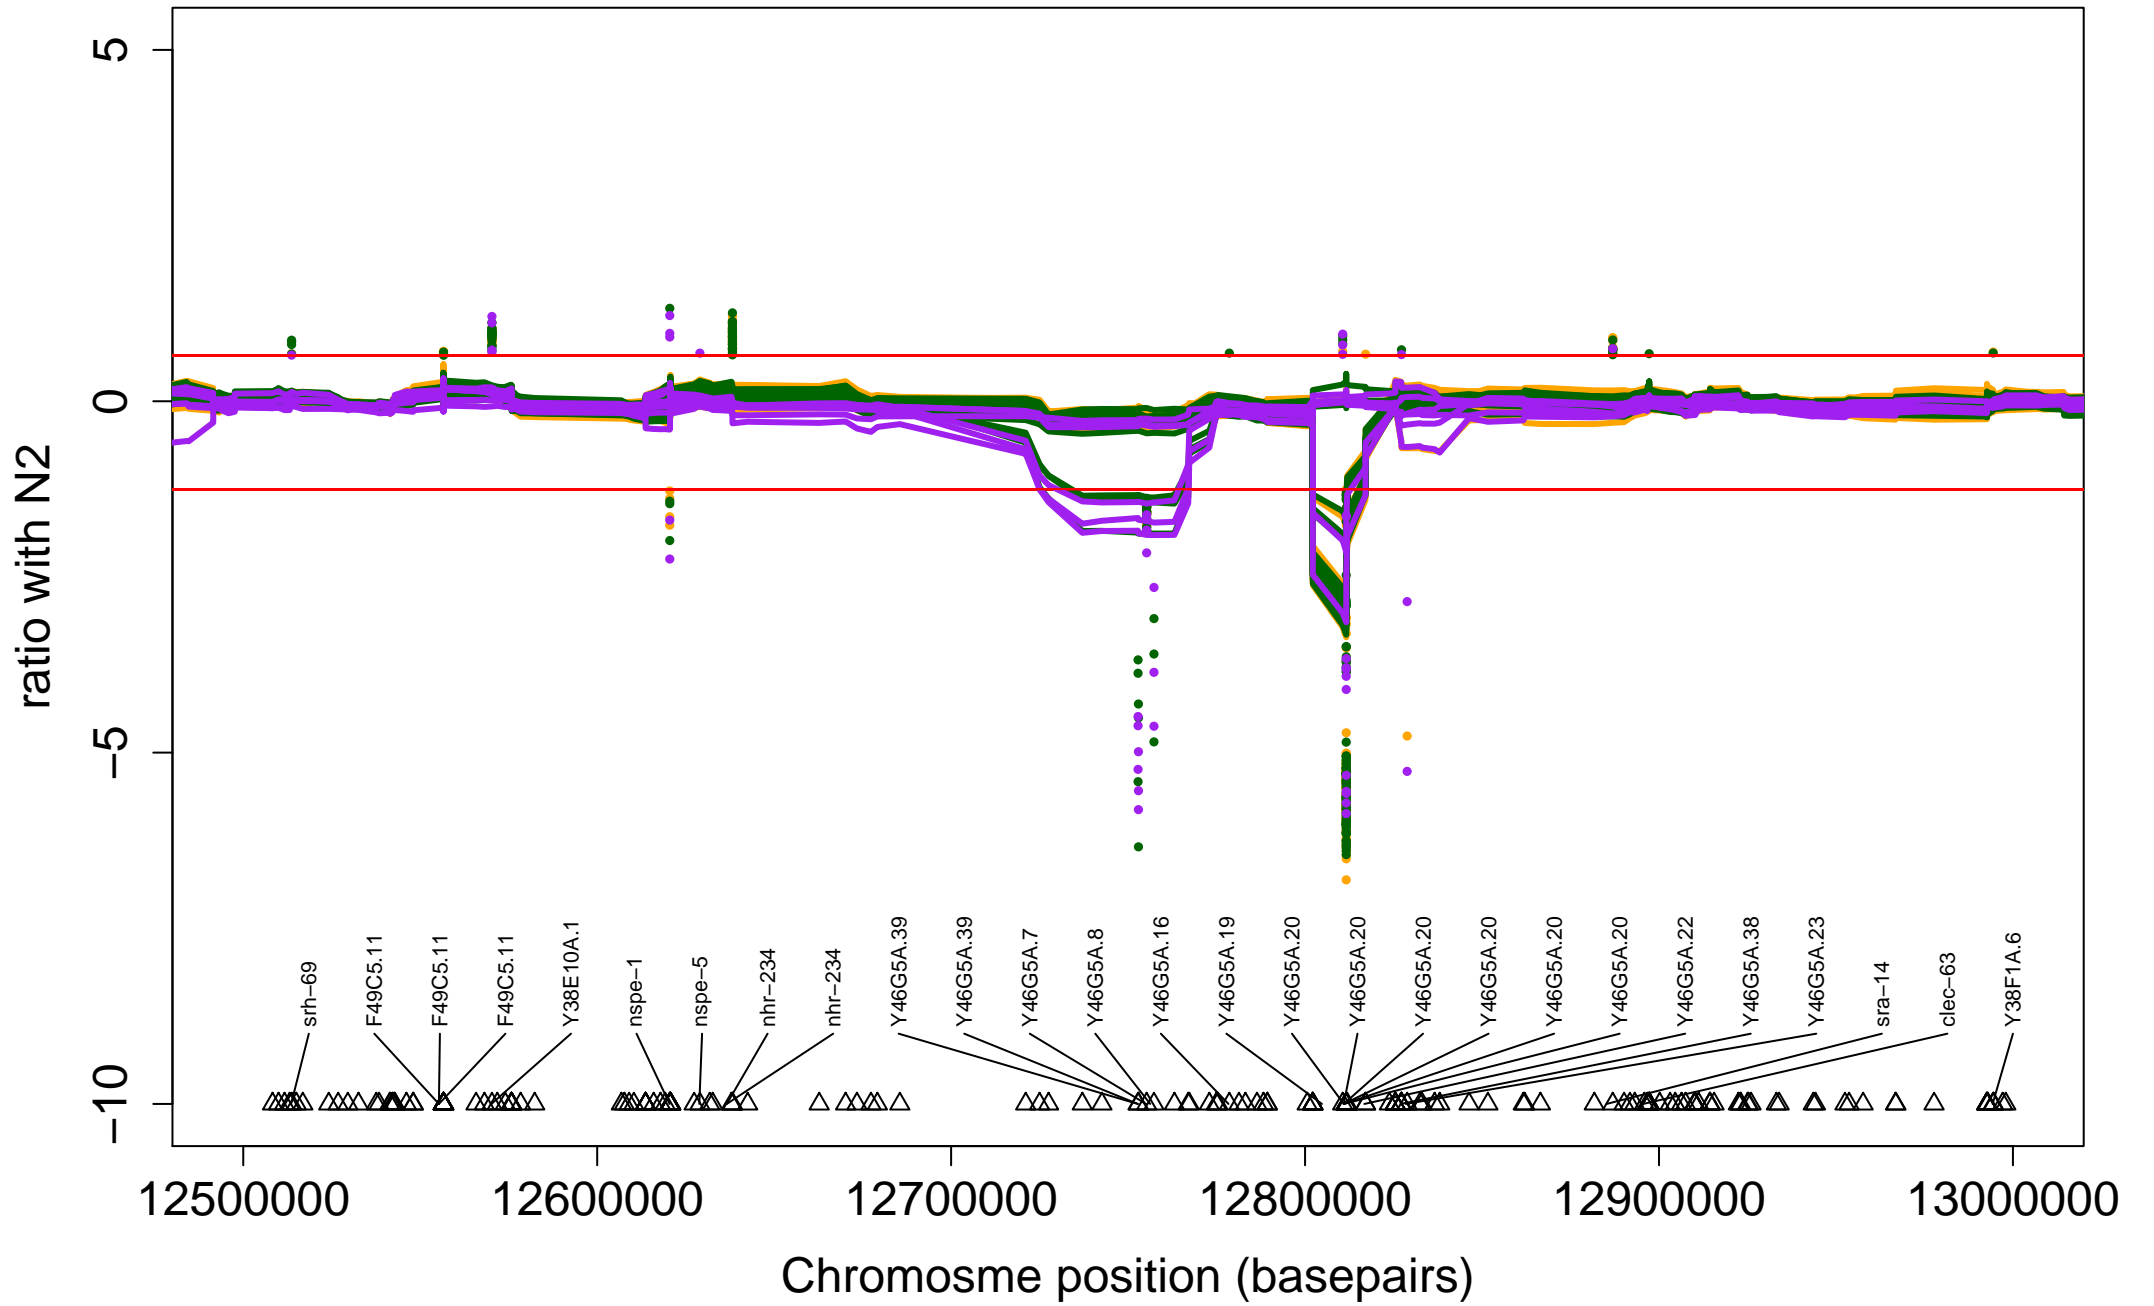

||

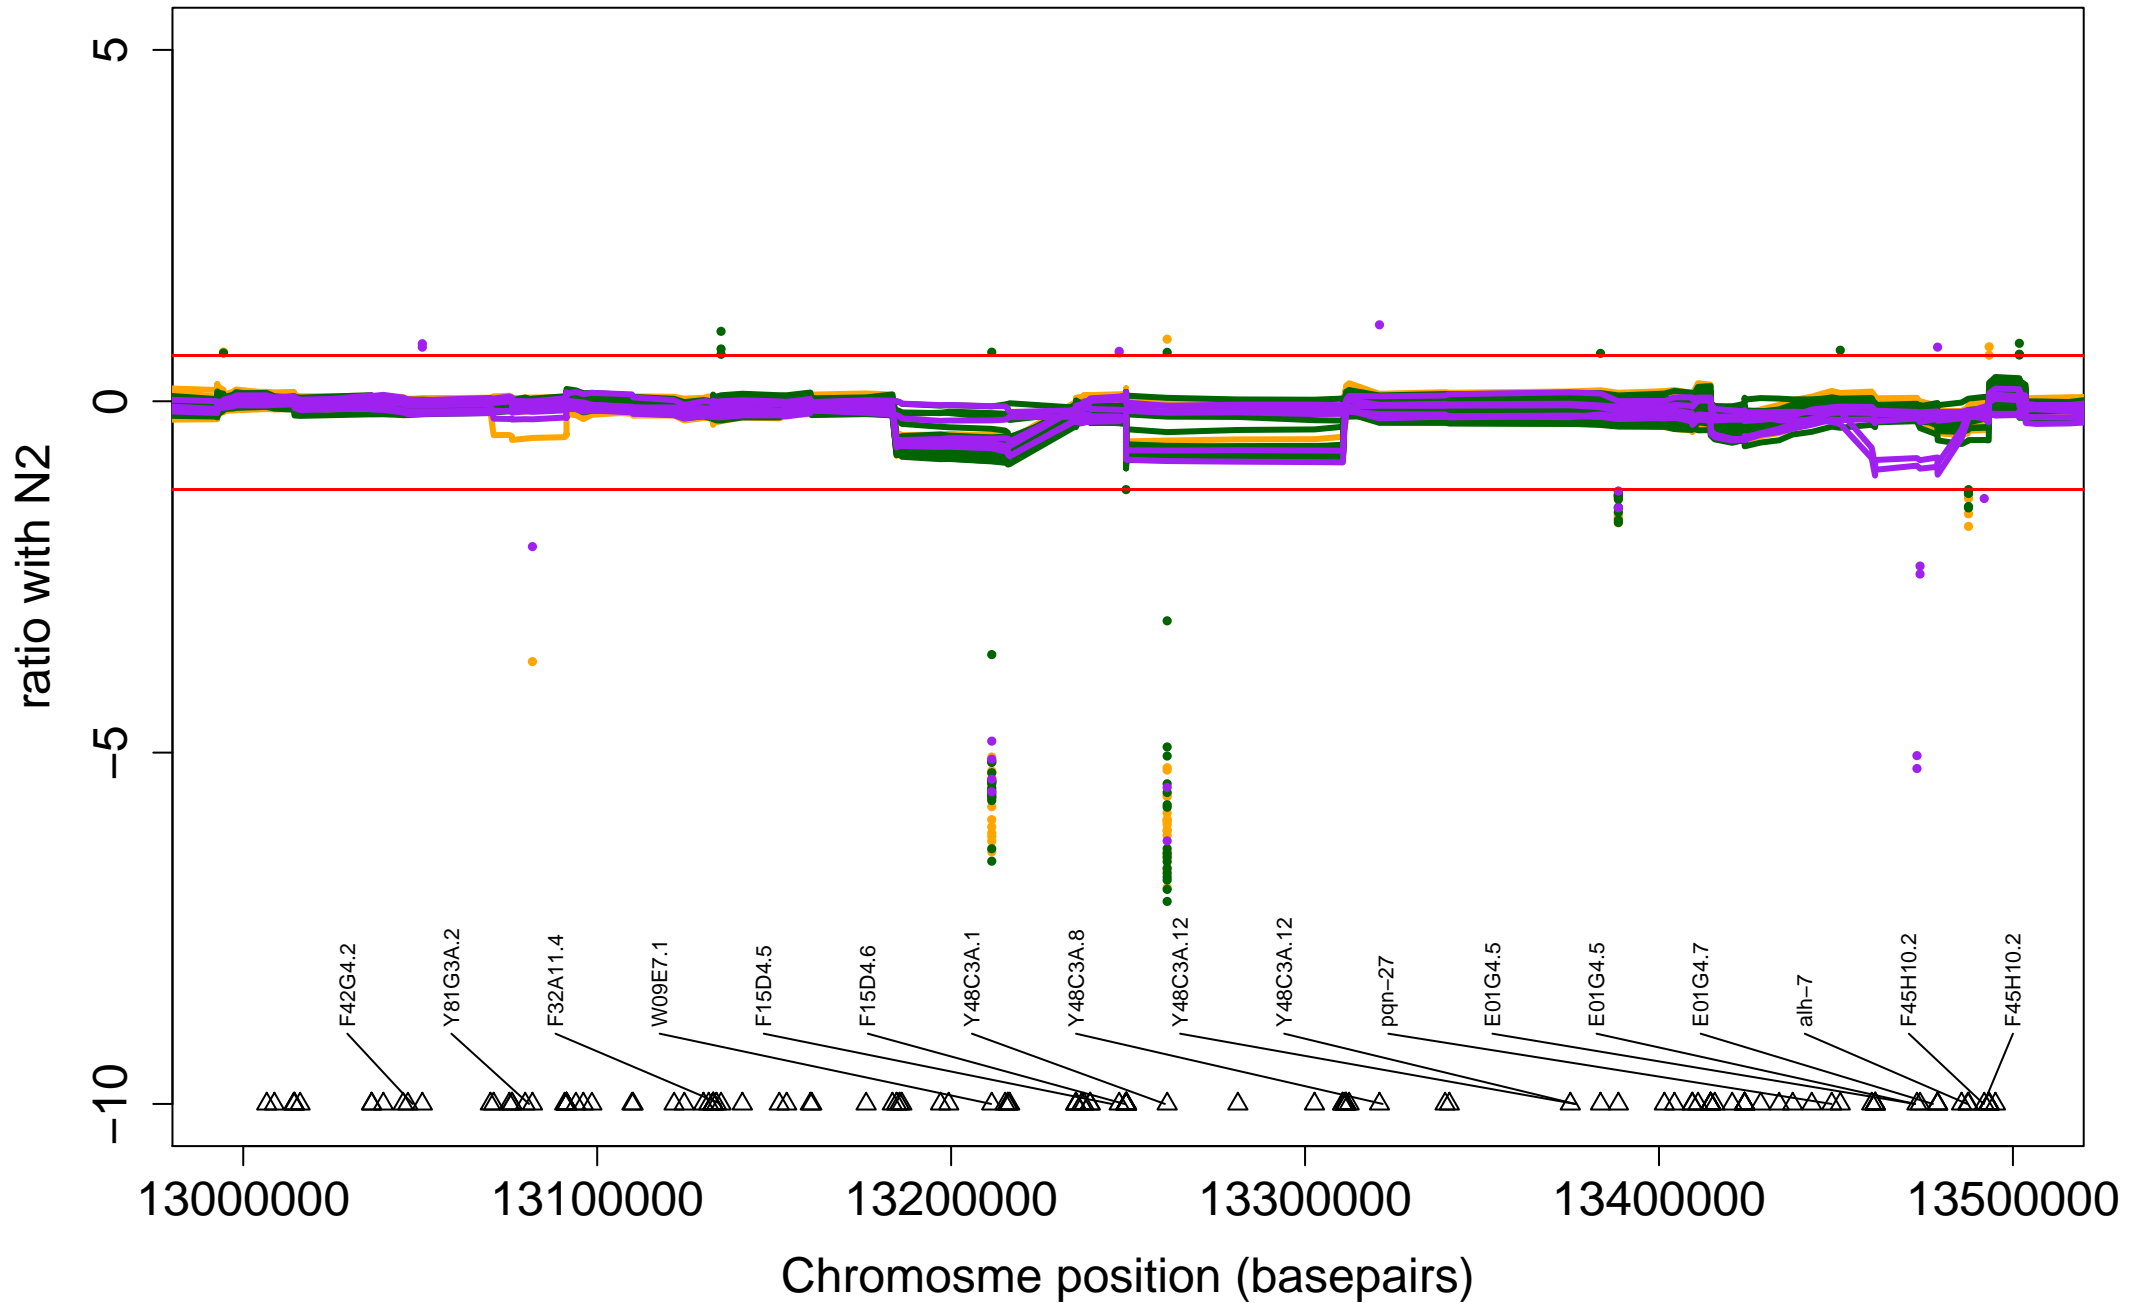

||

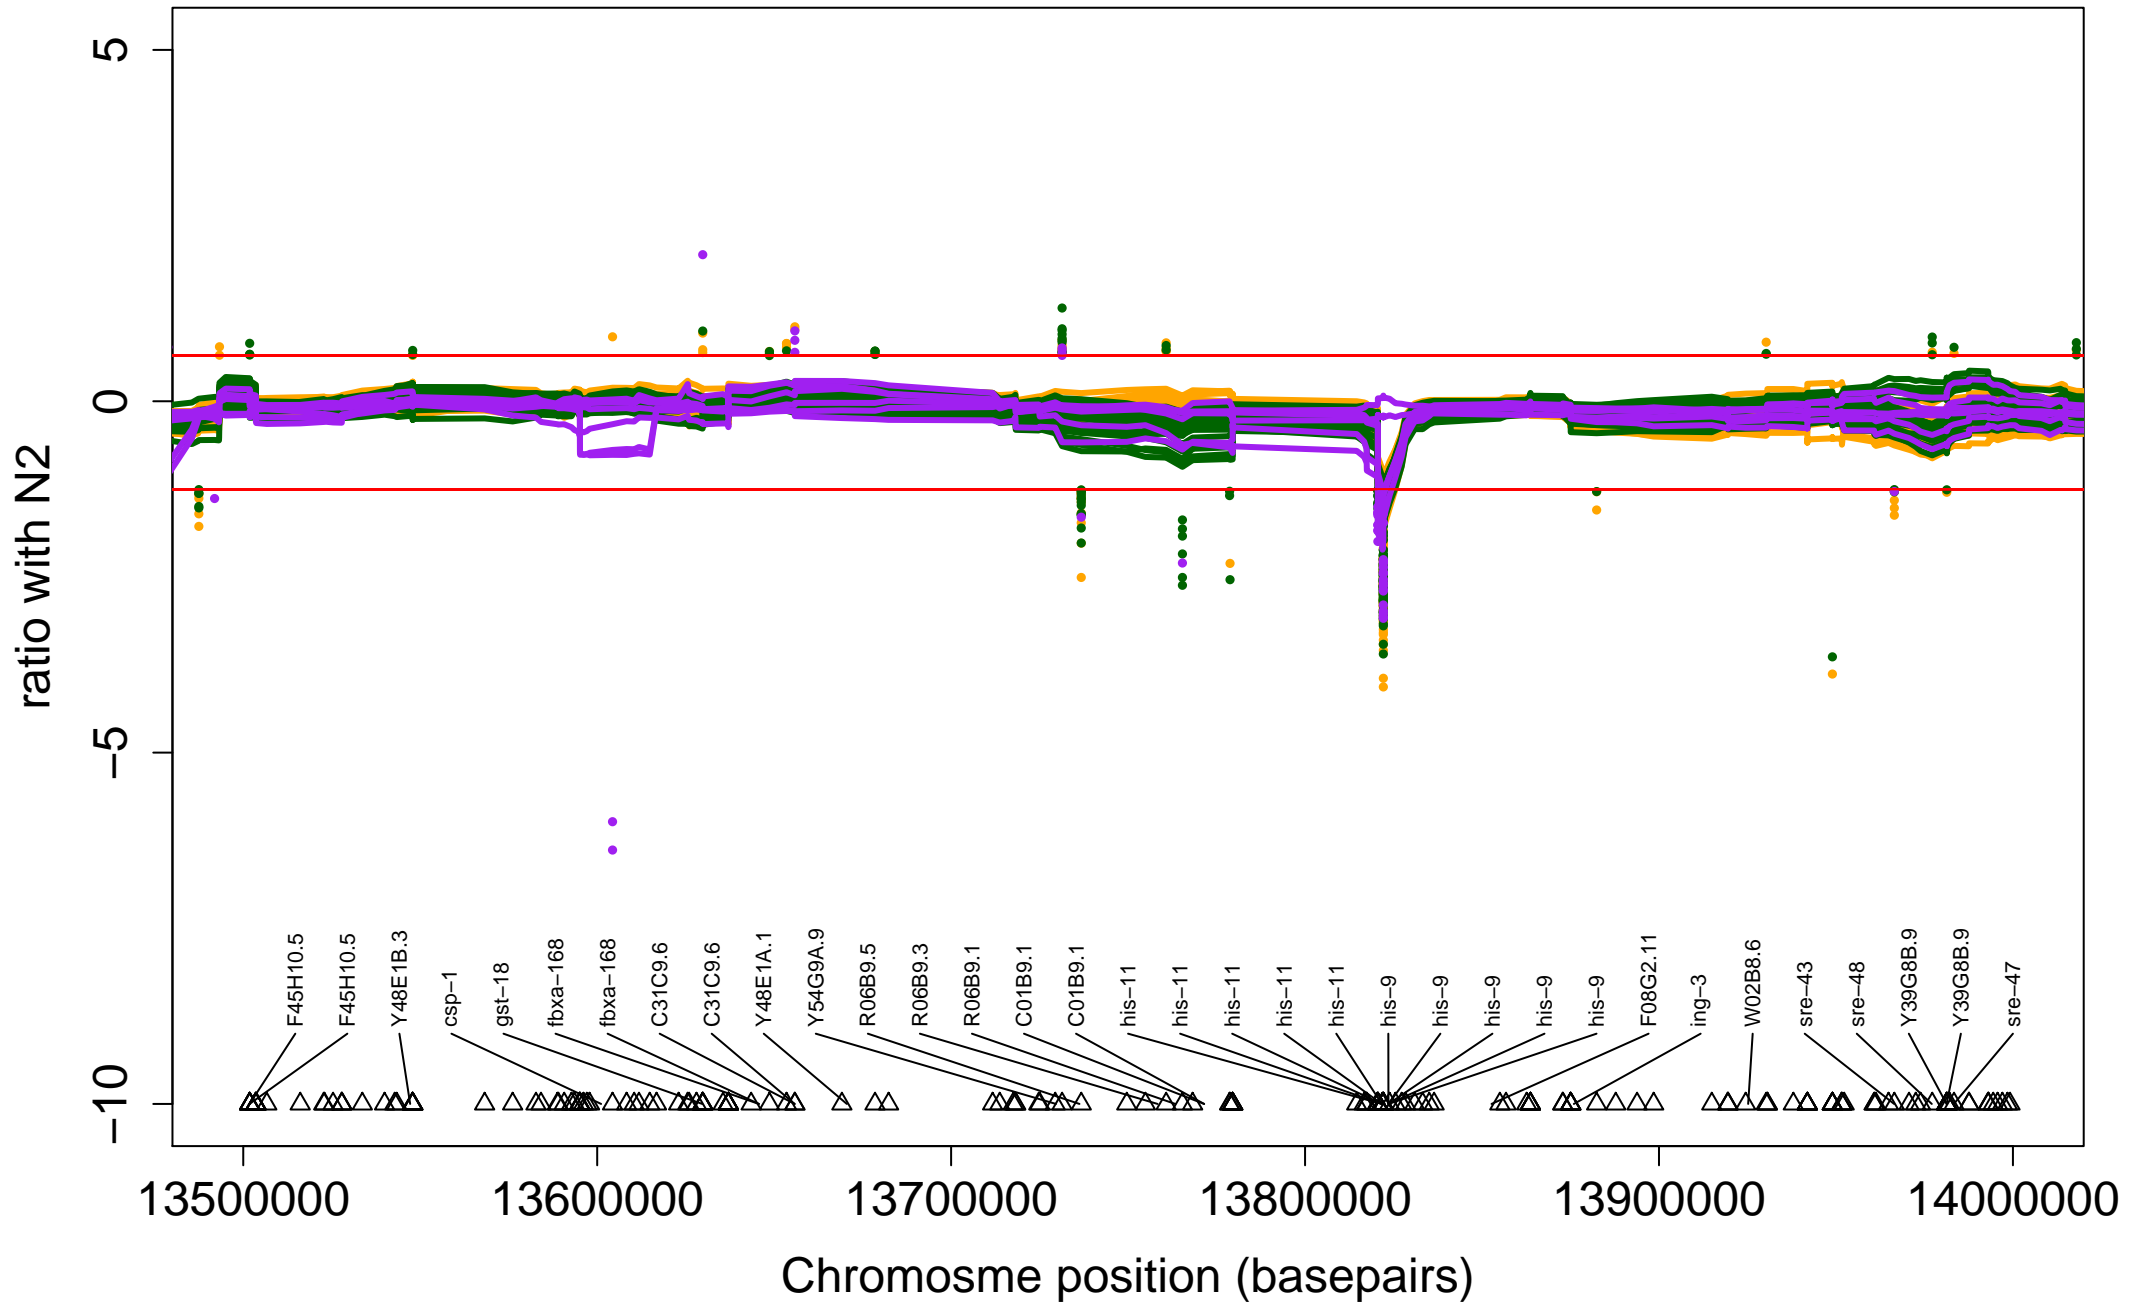

||

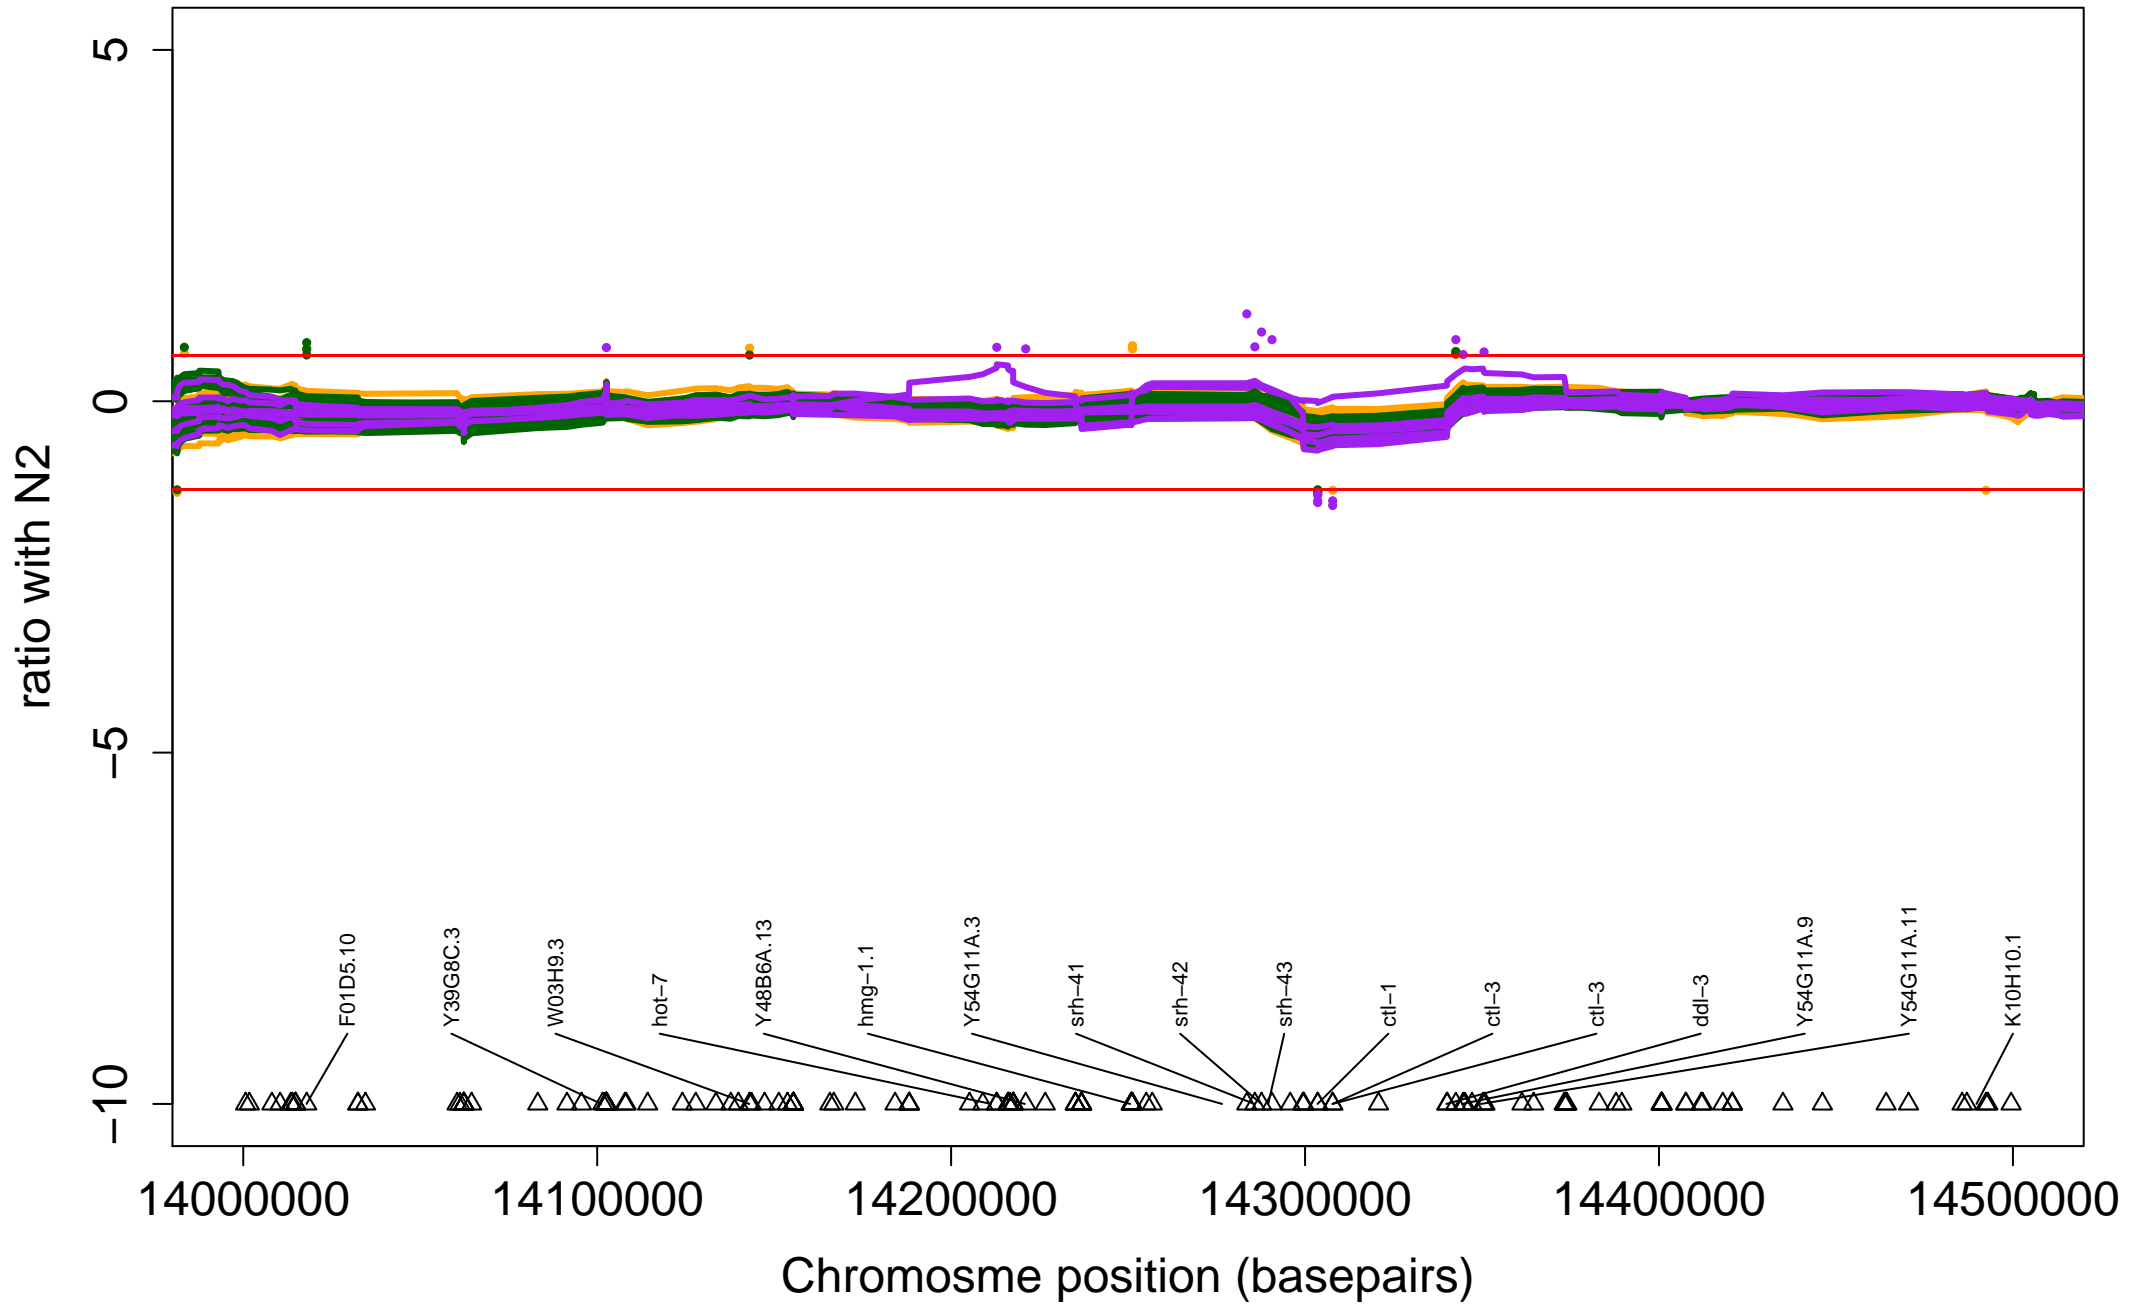

||

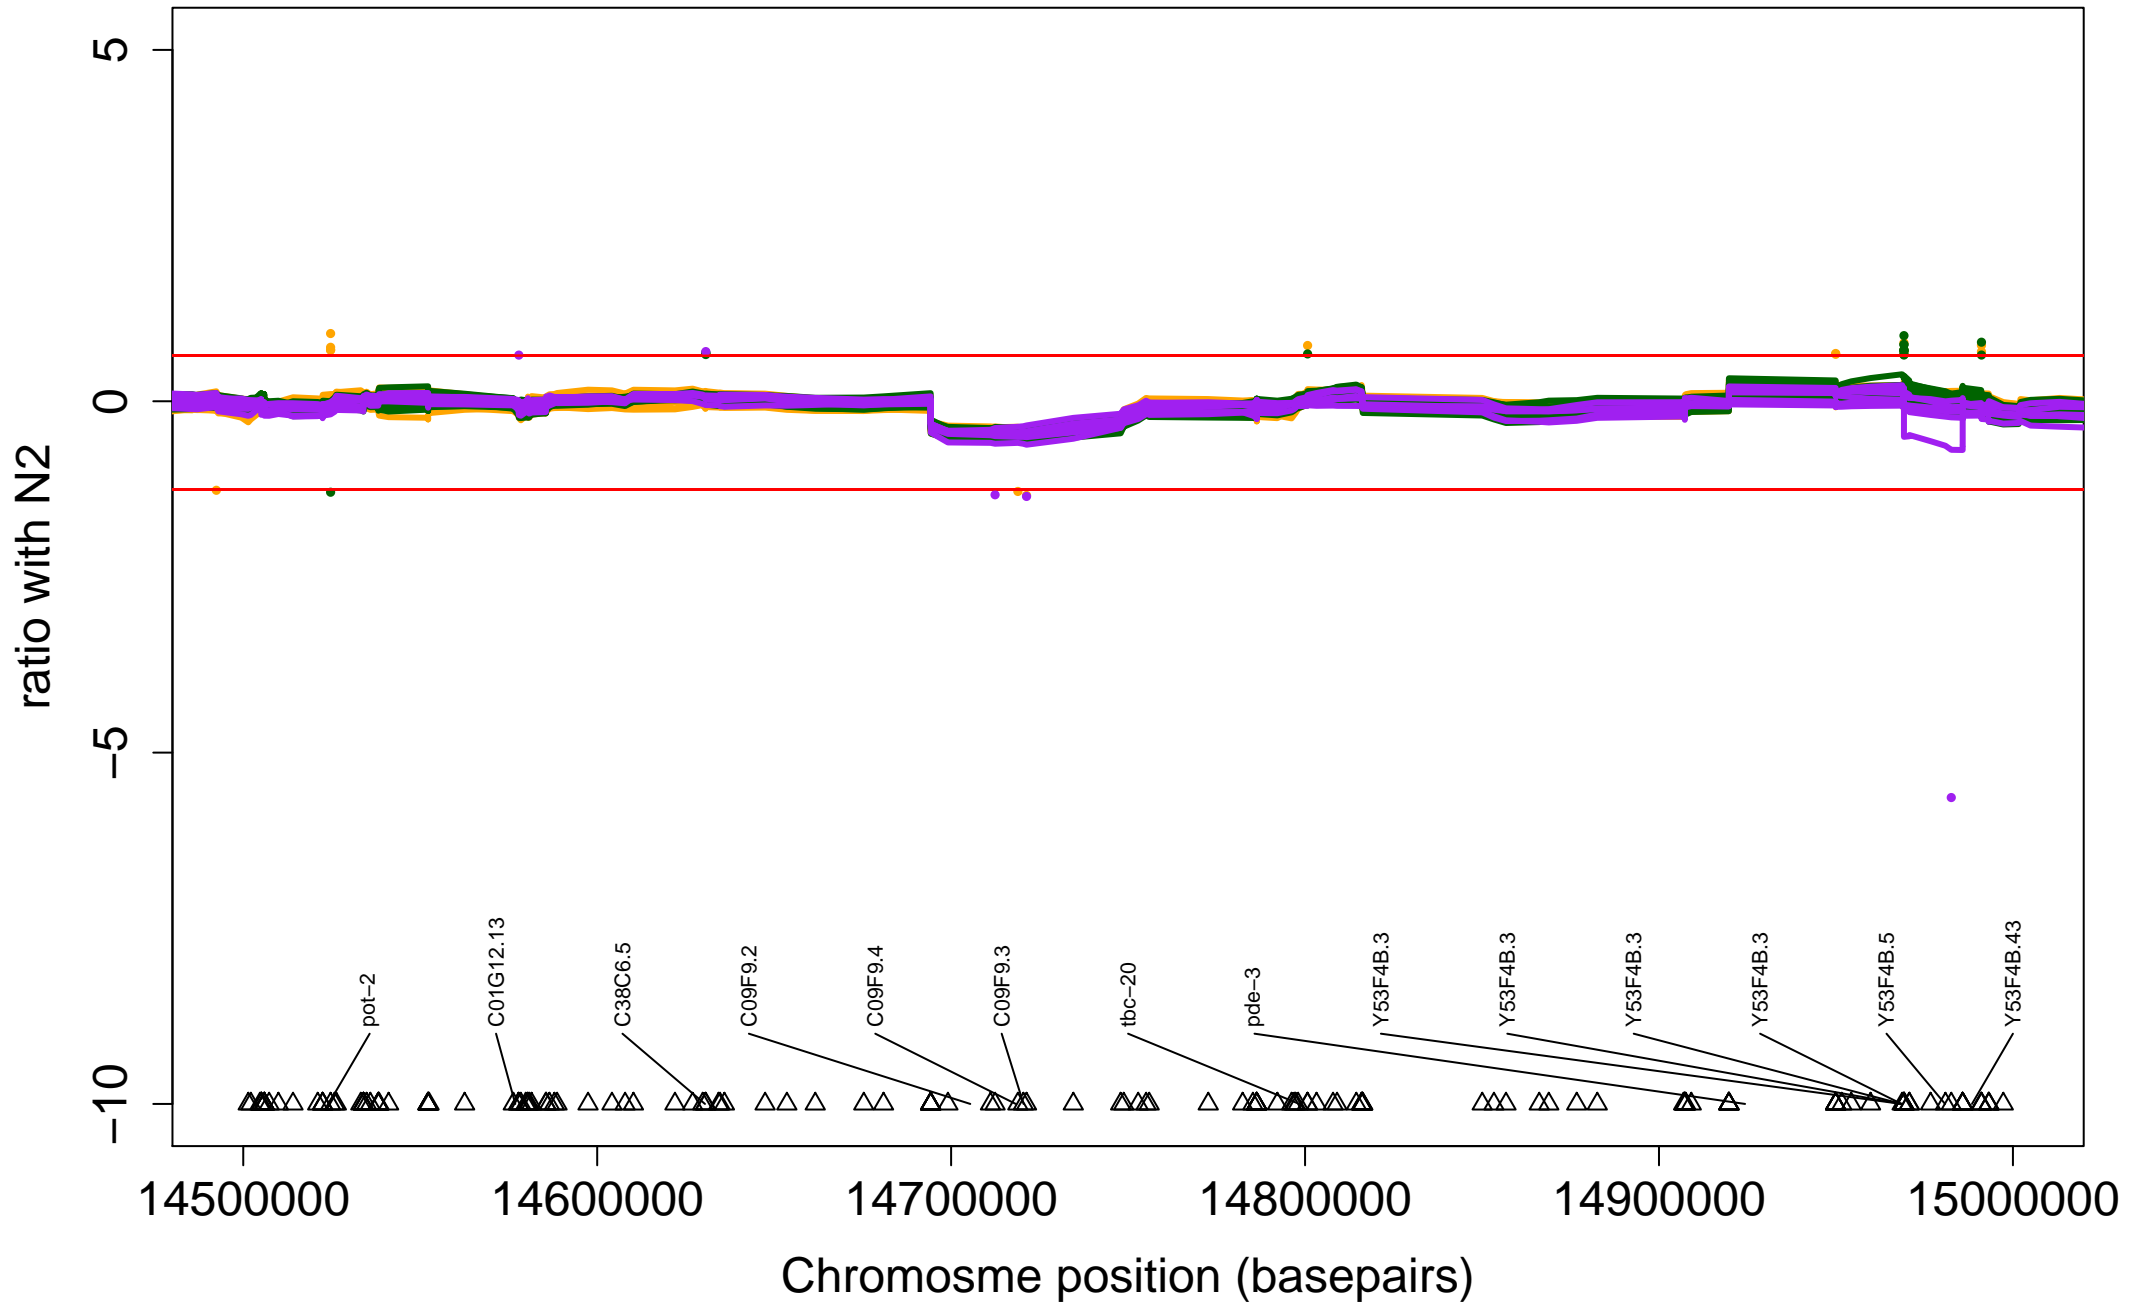

||

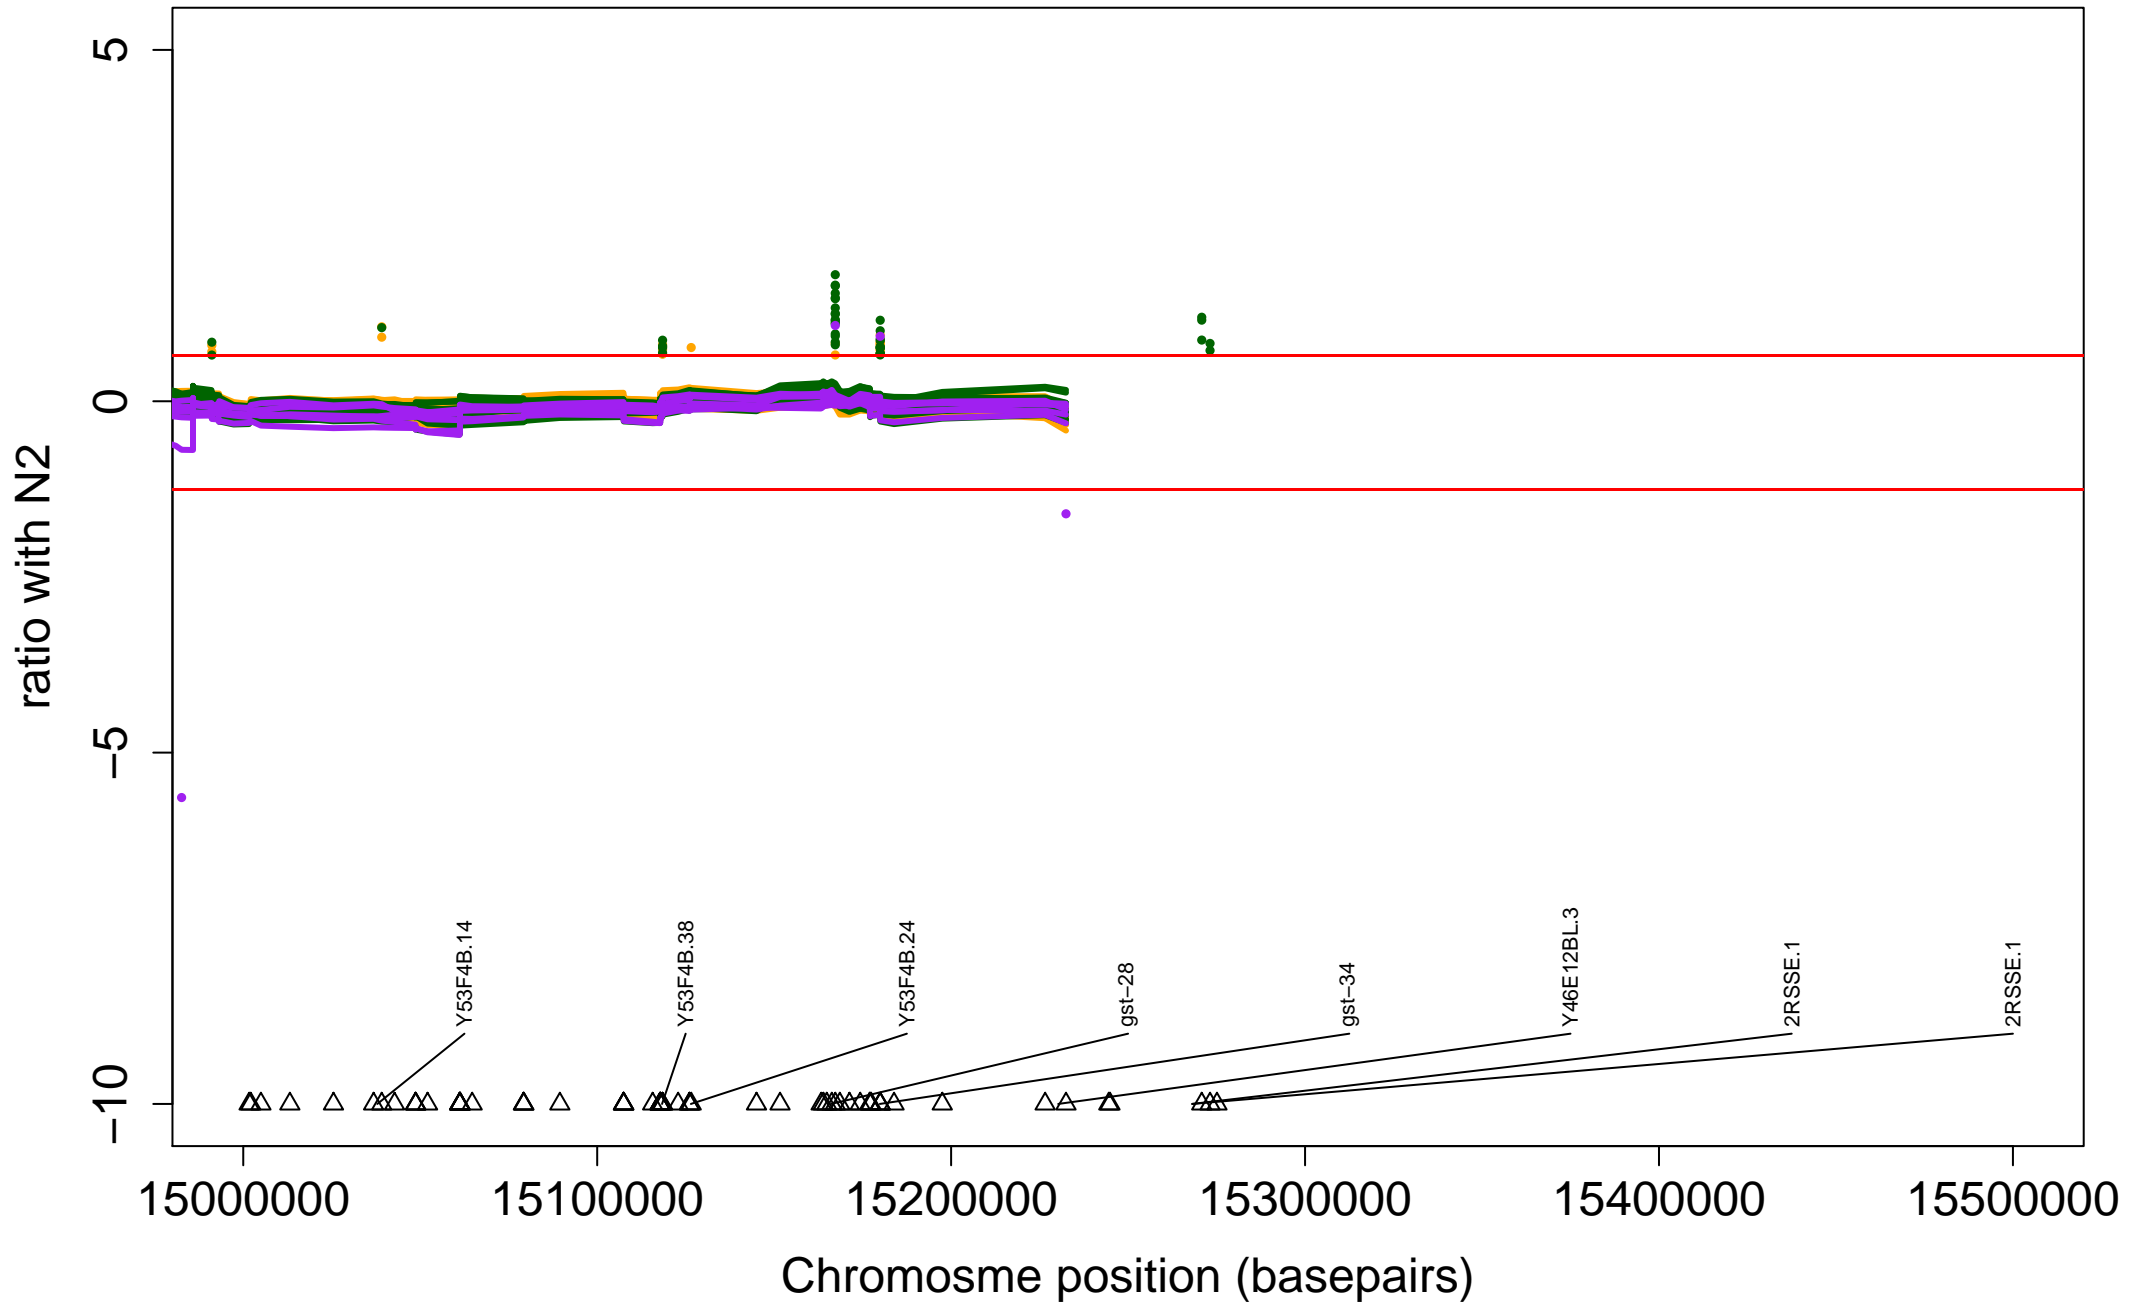

||

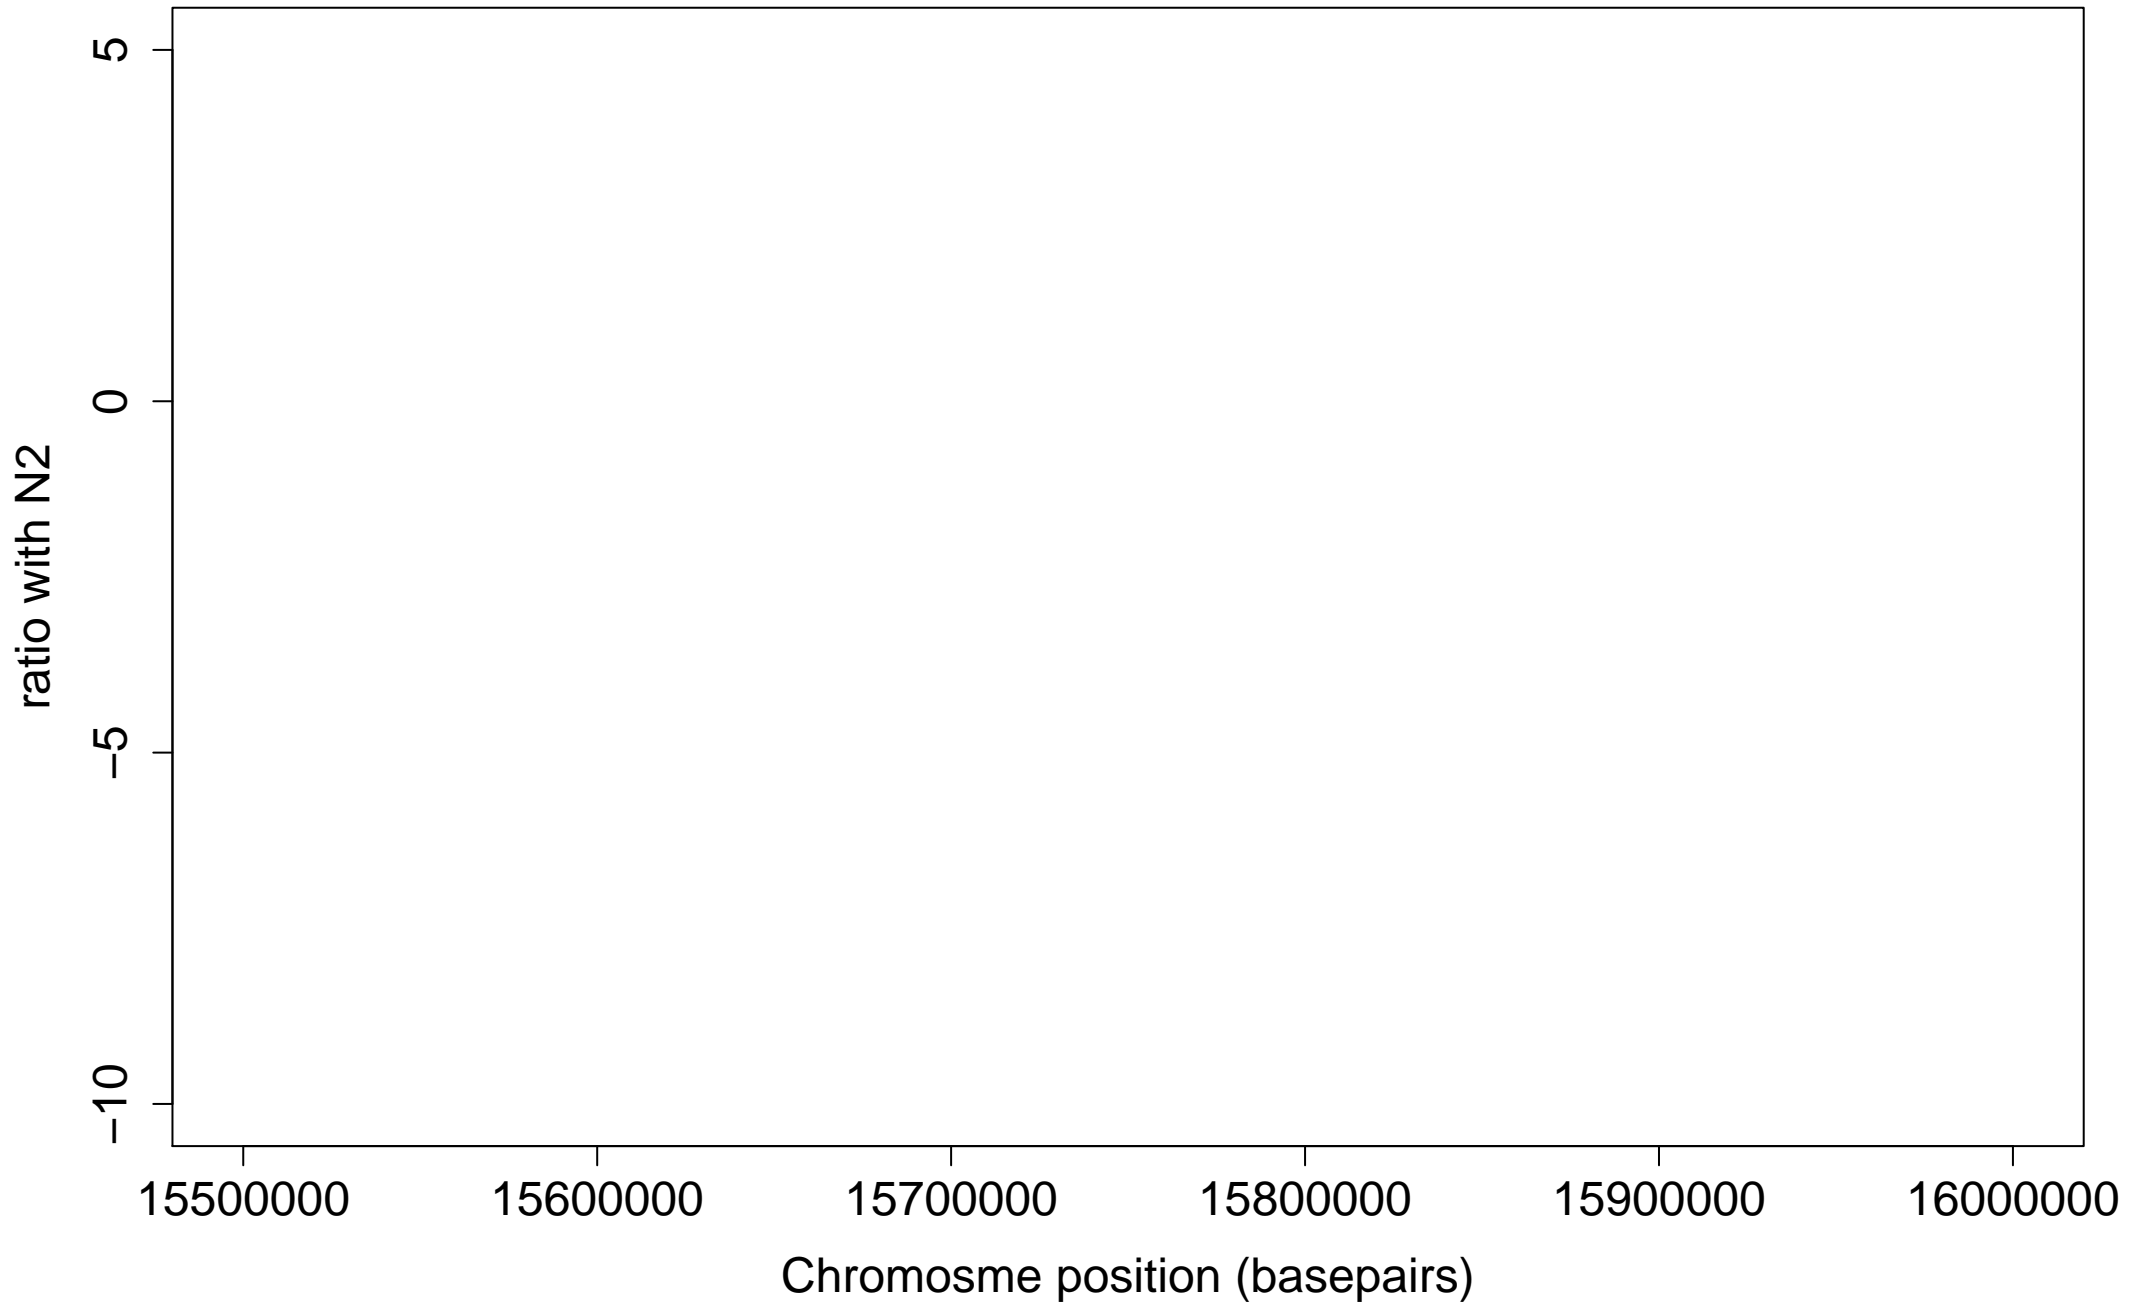

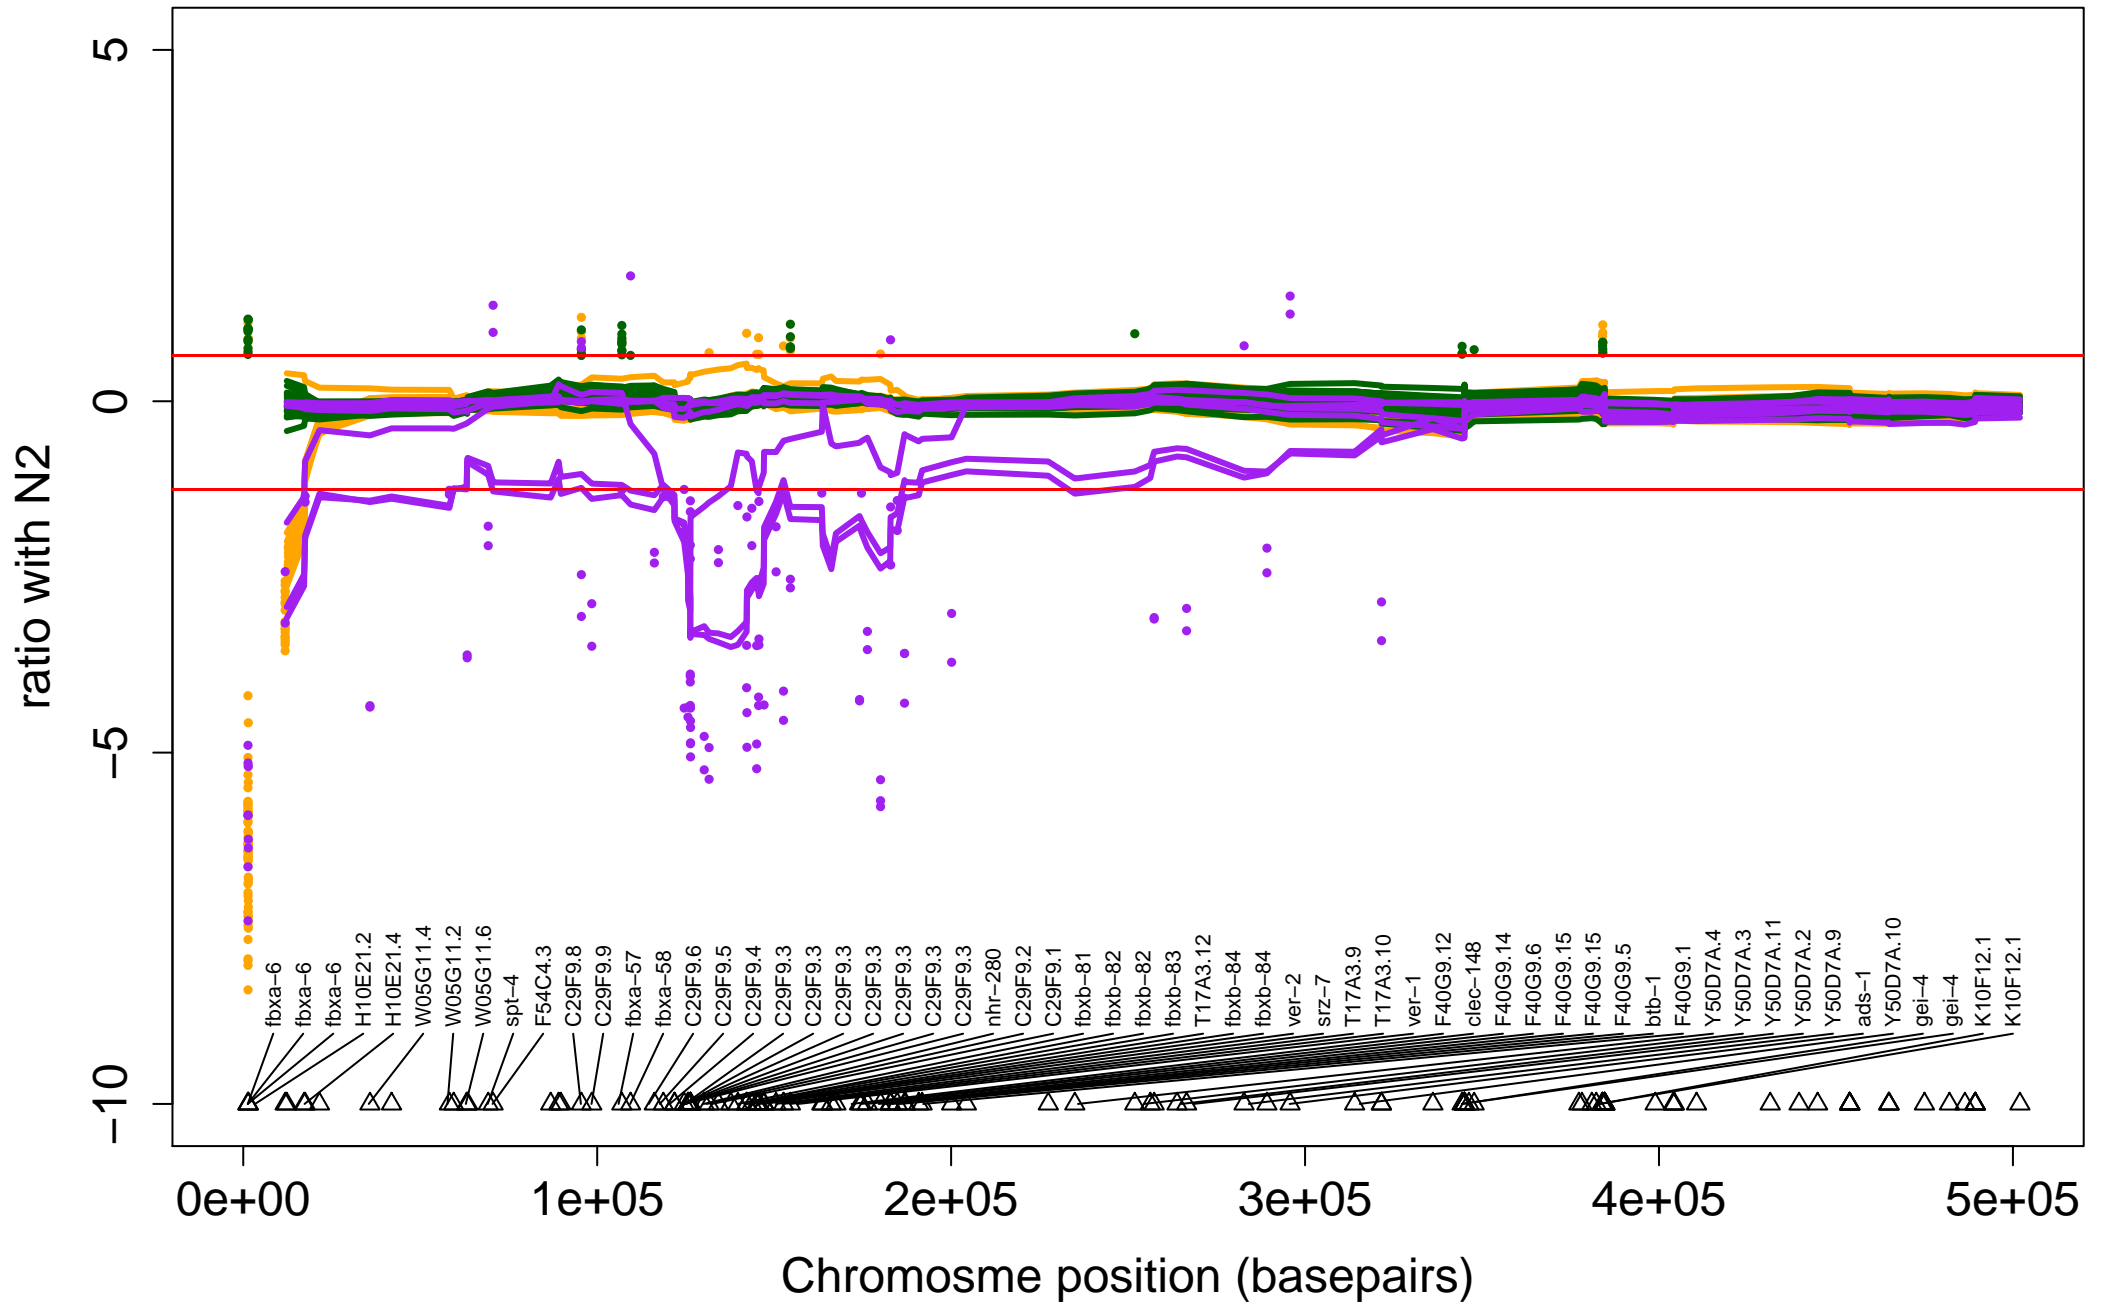



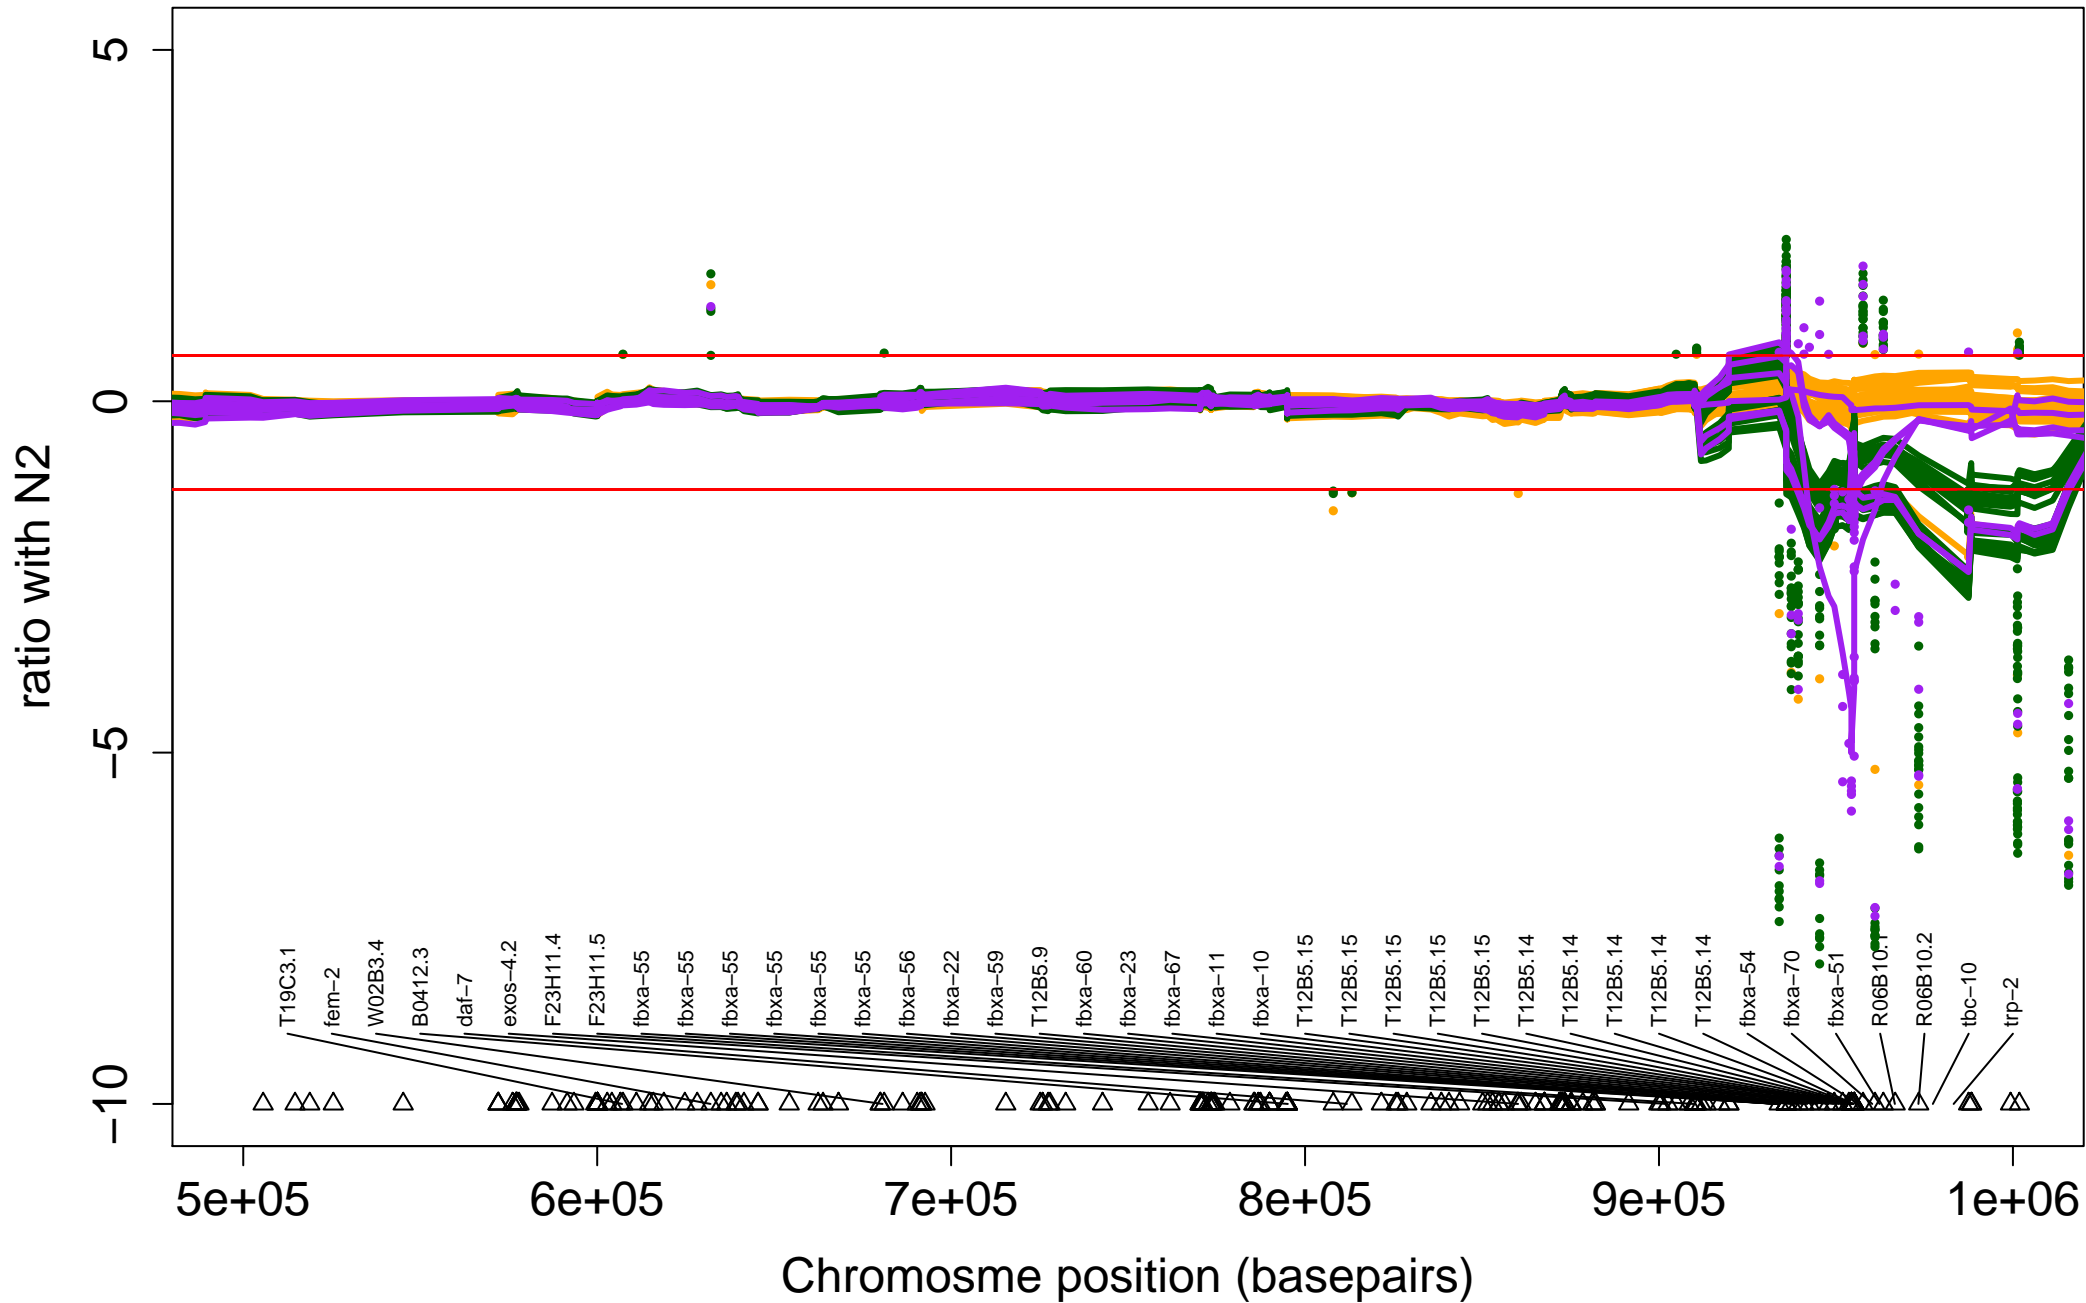

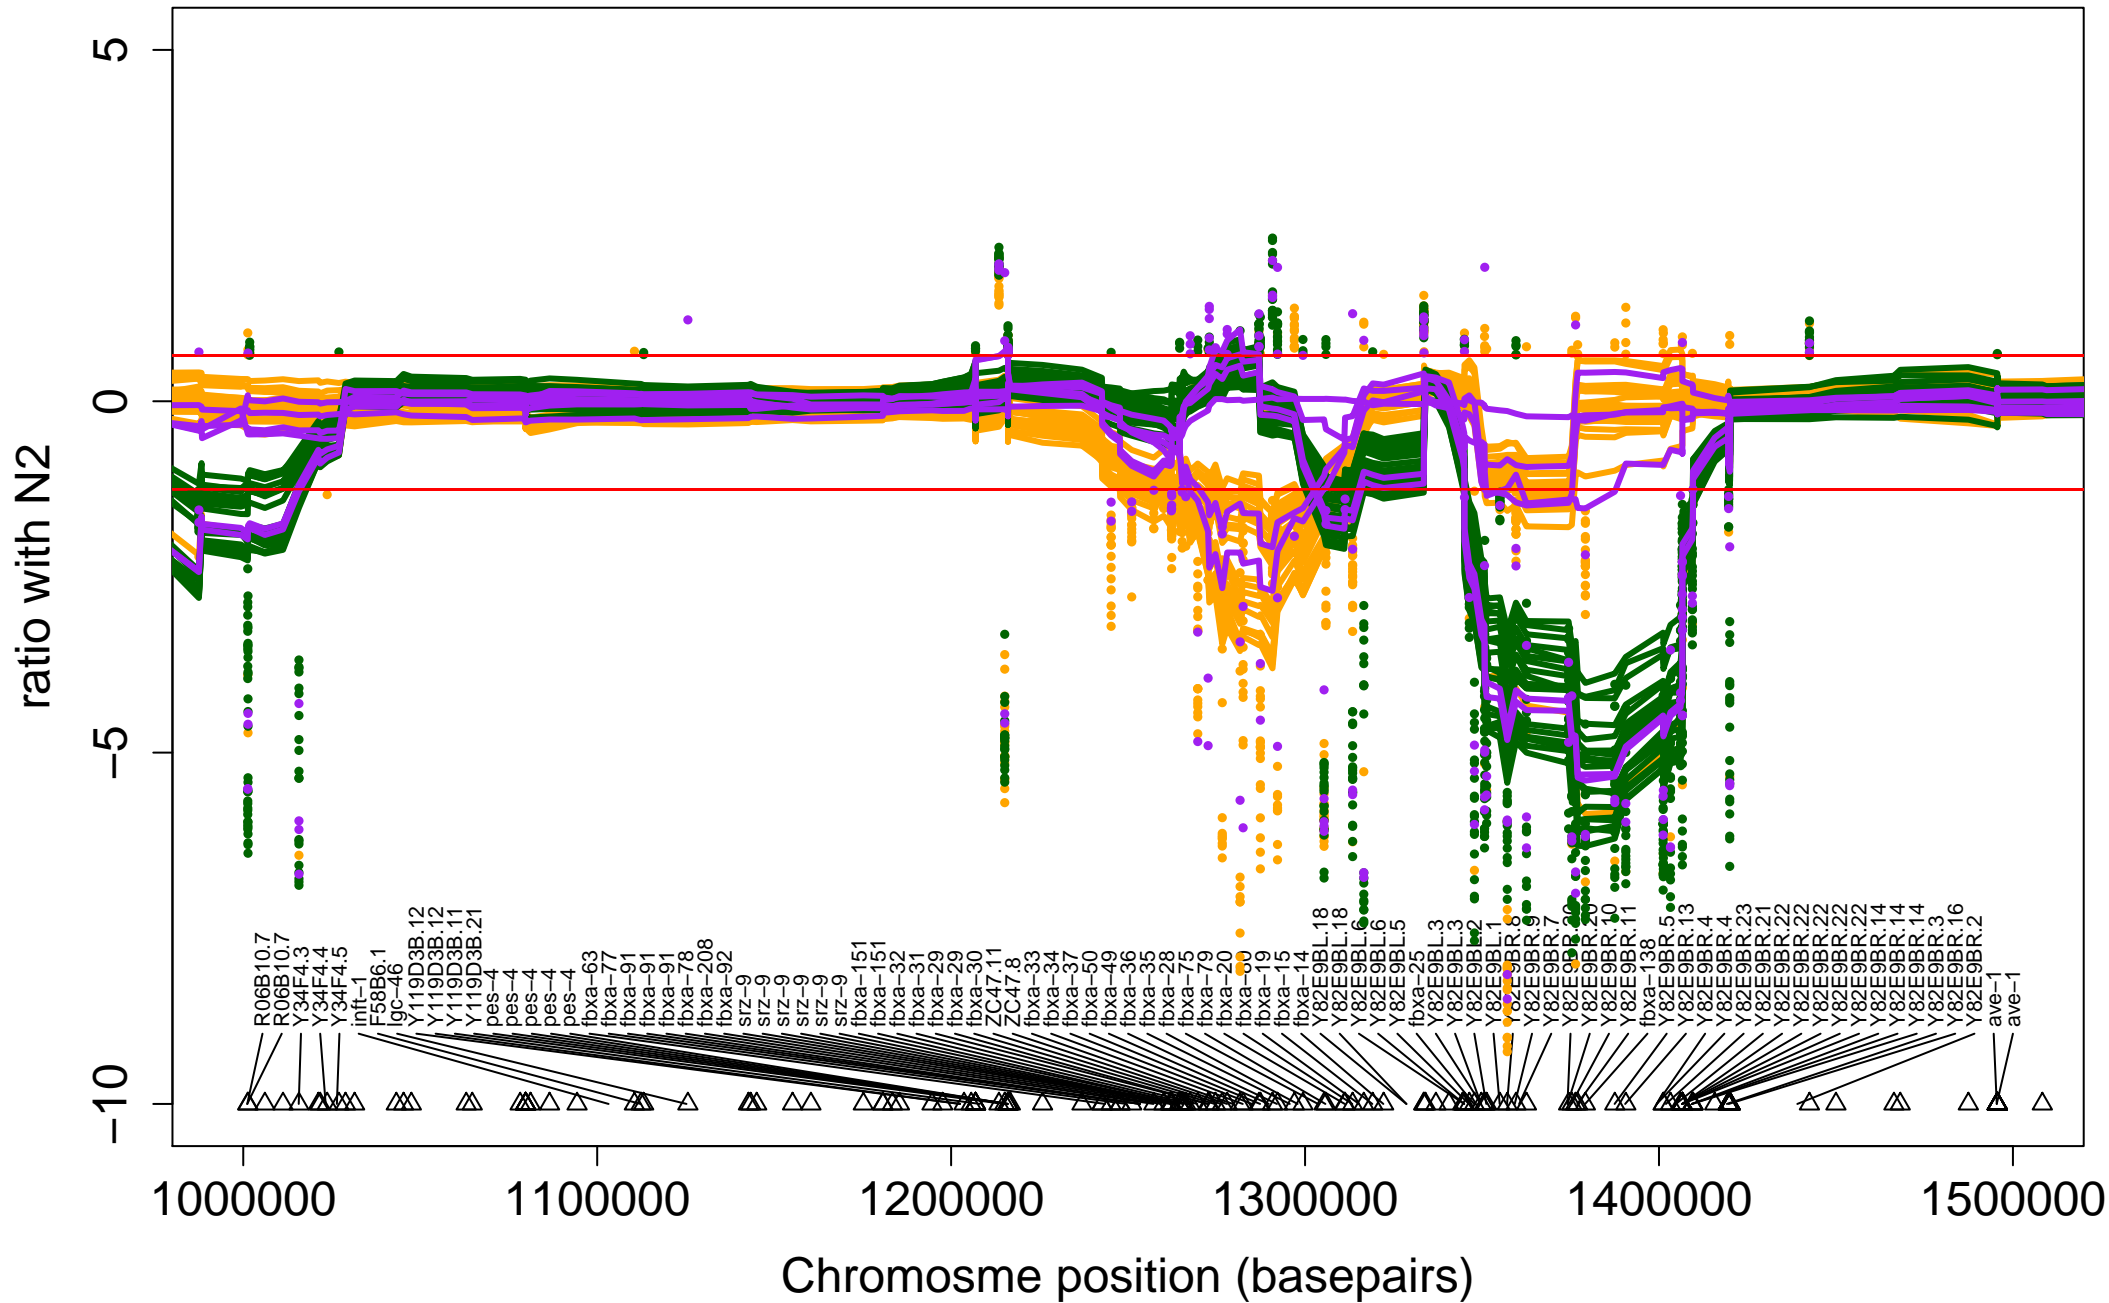

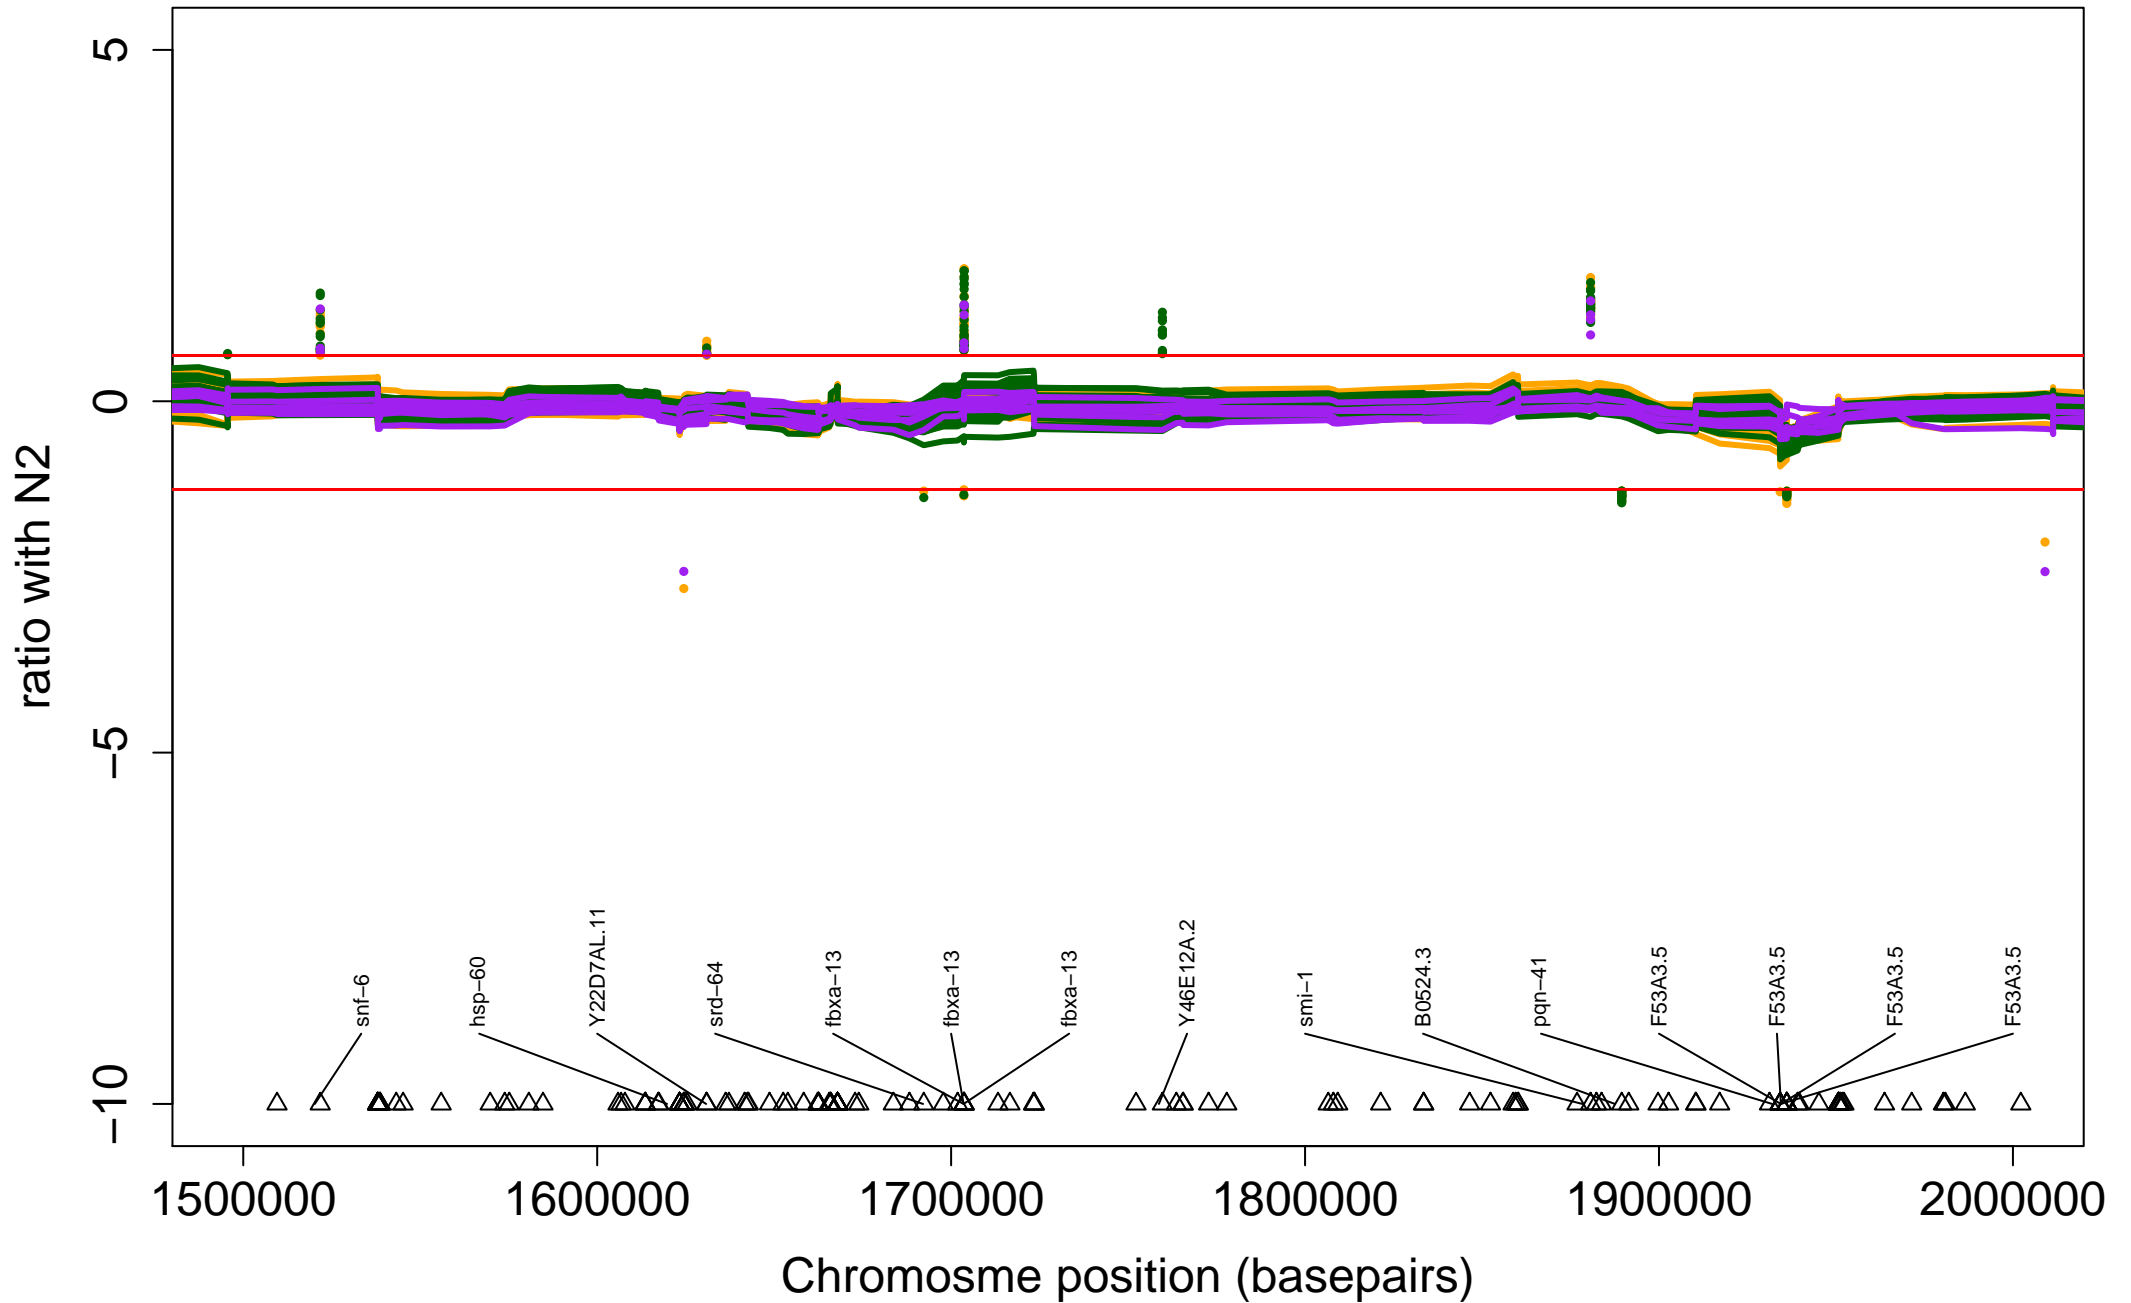

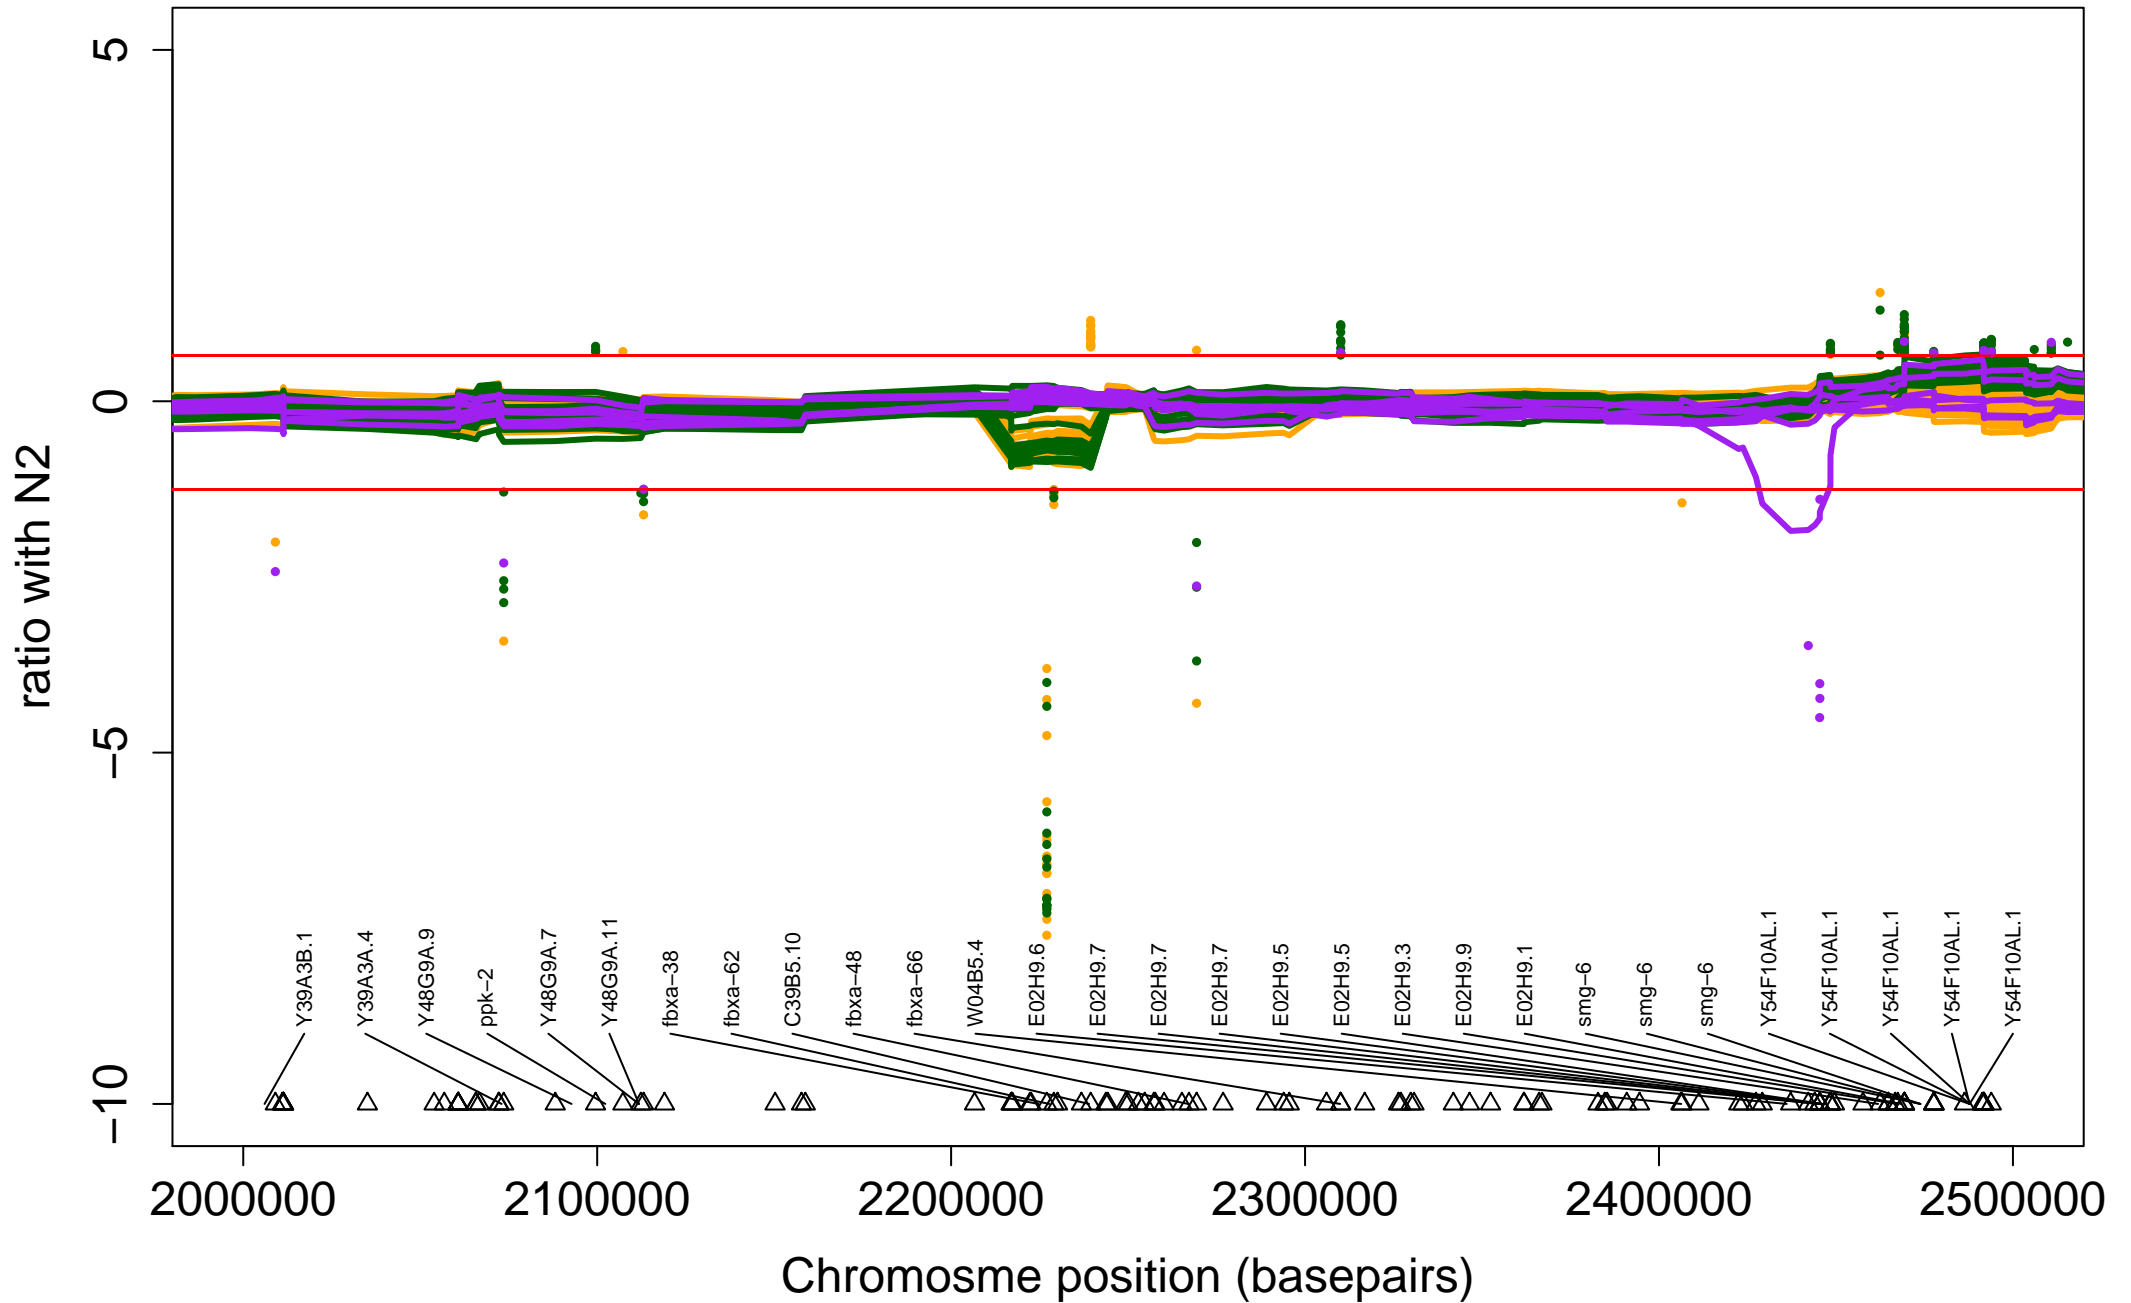

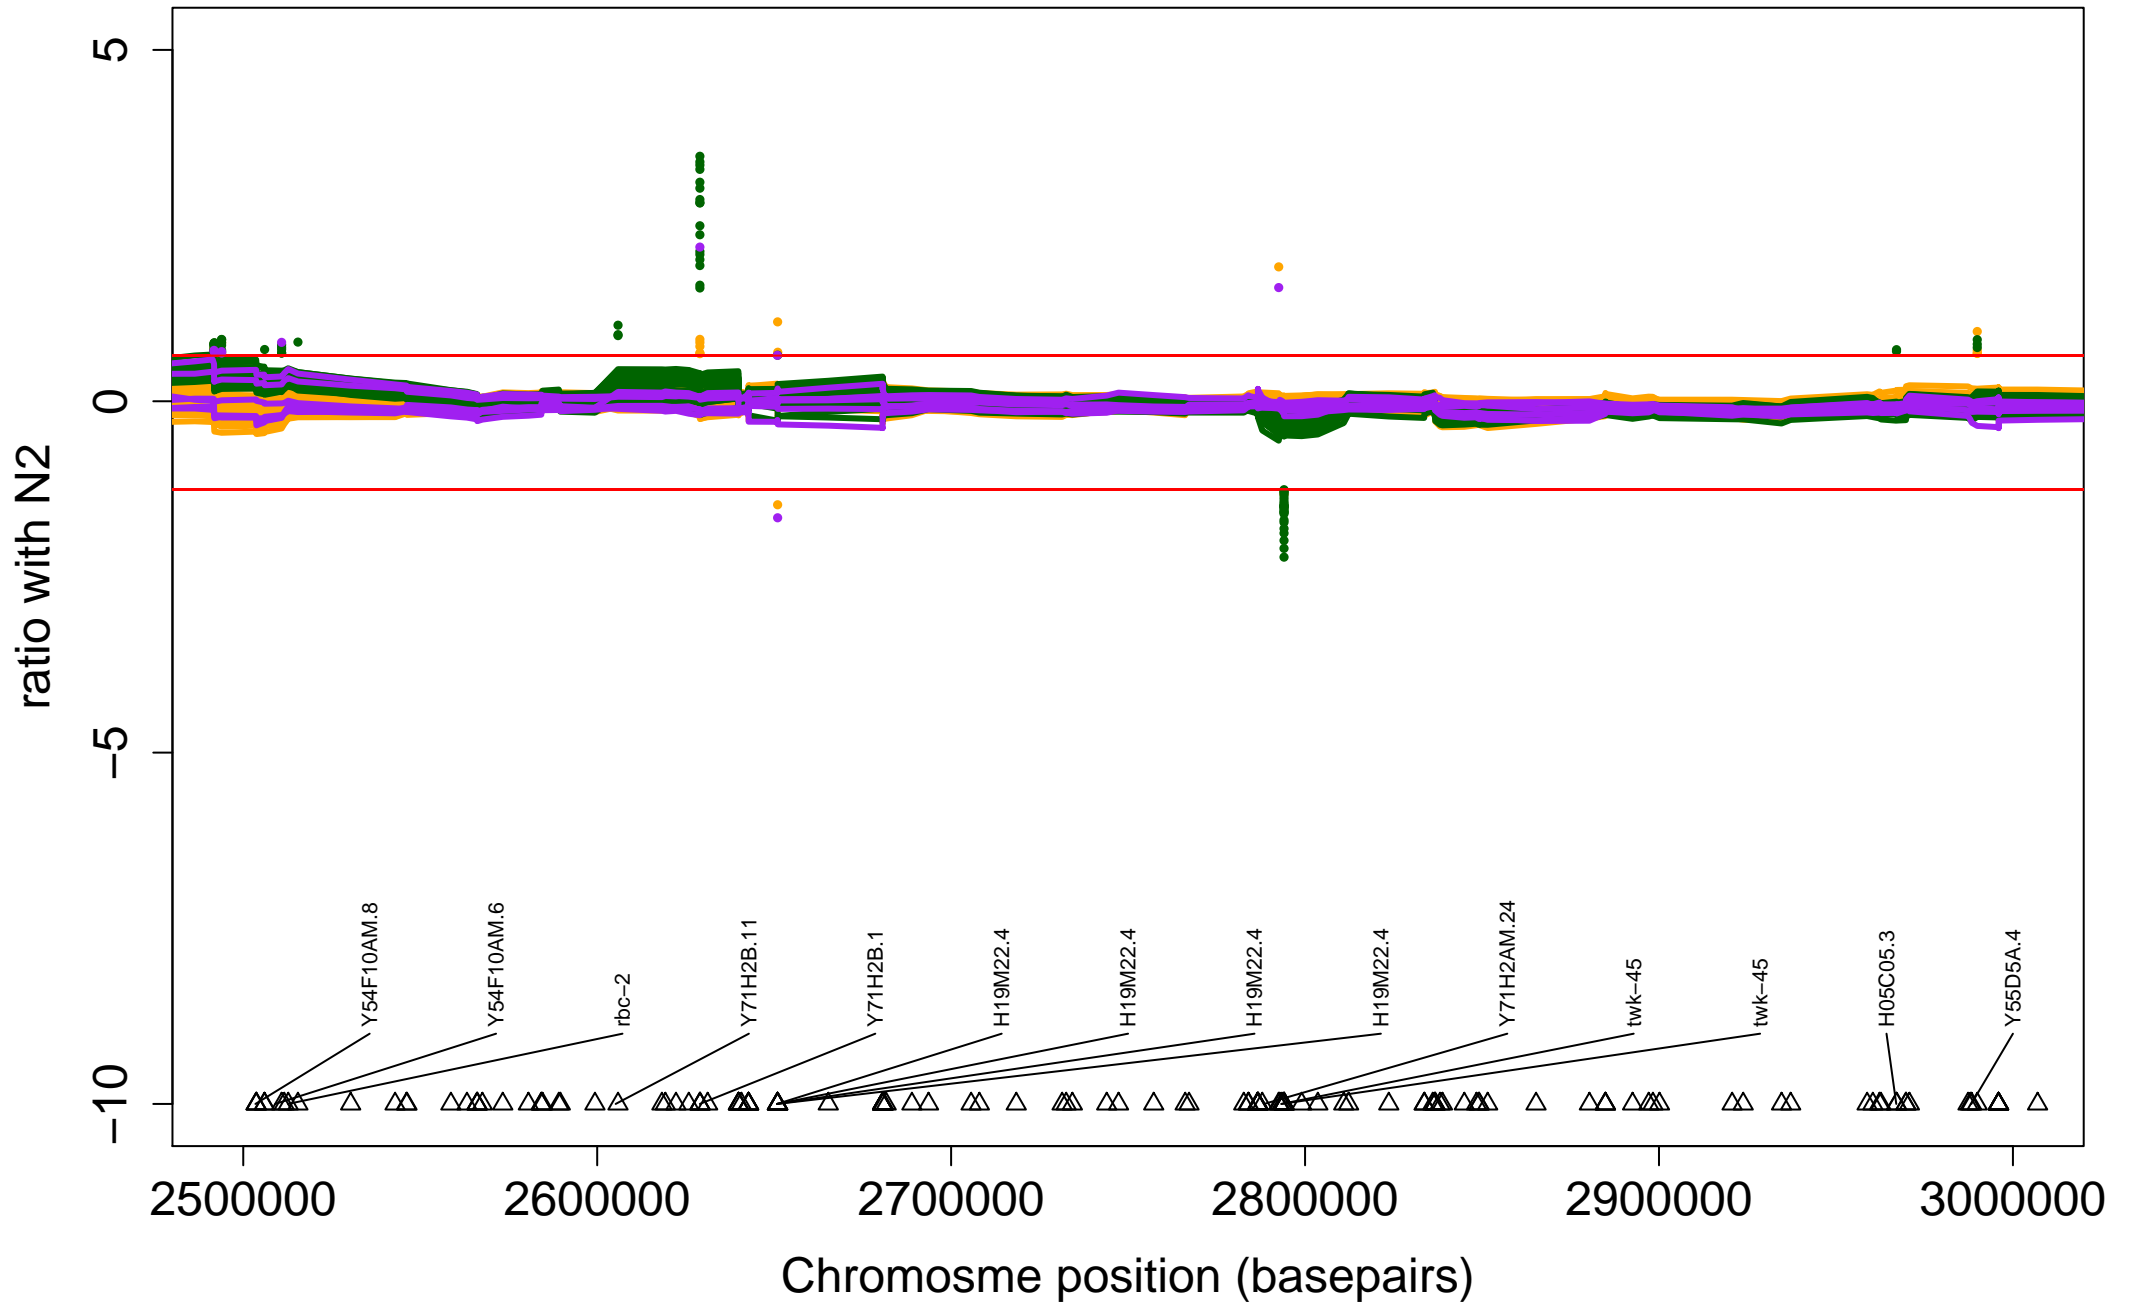

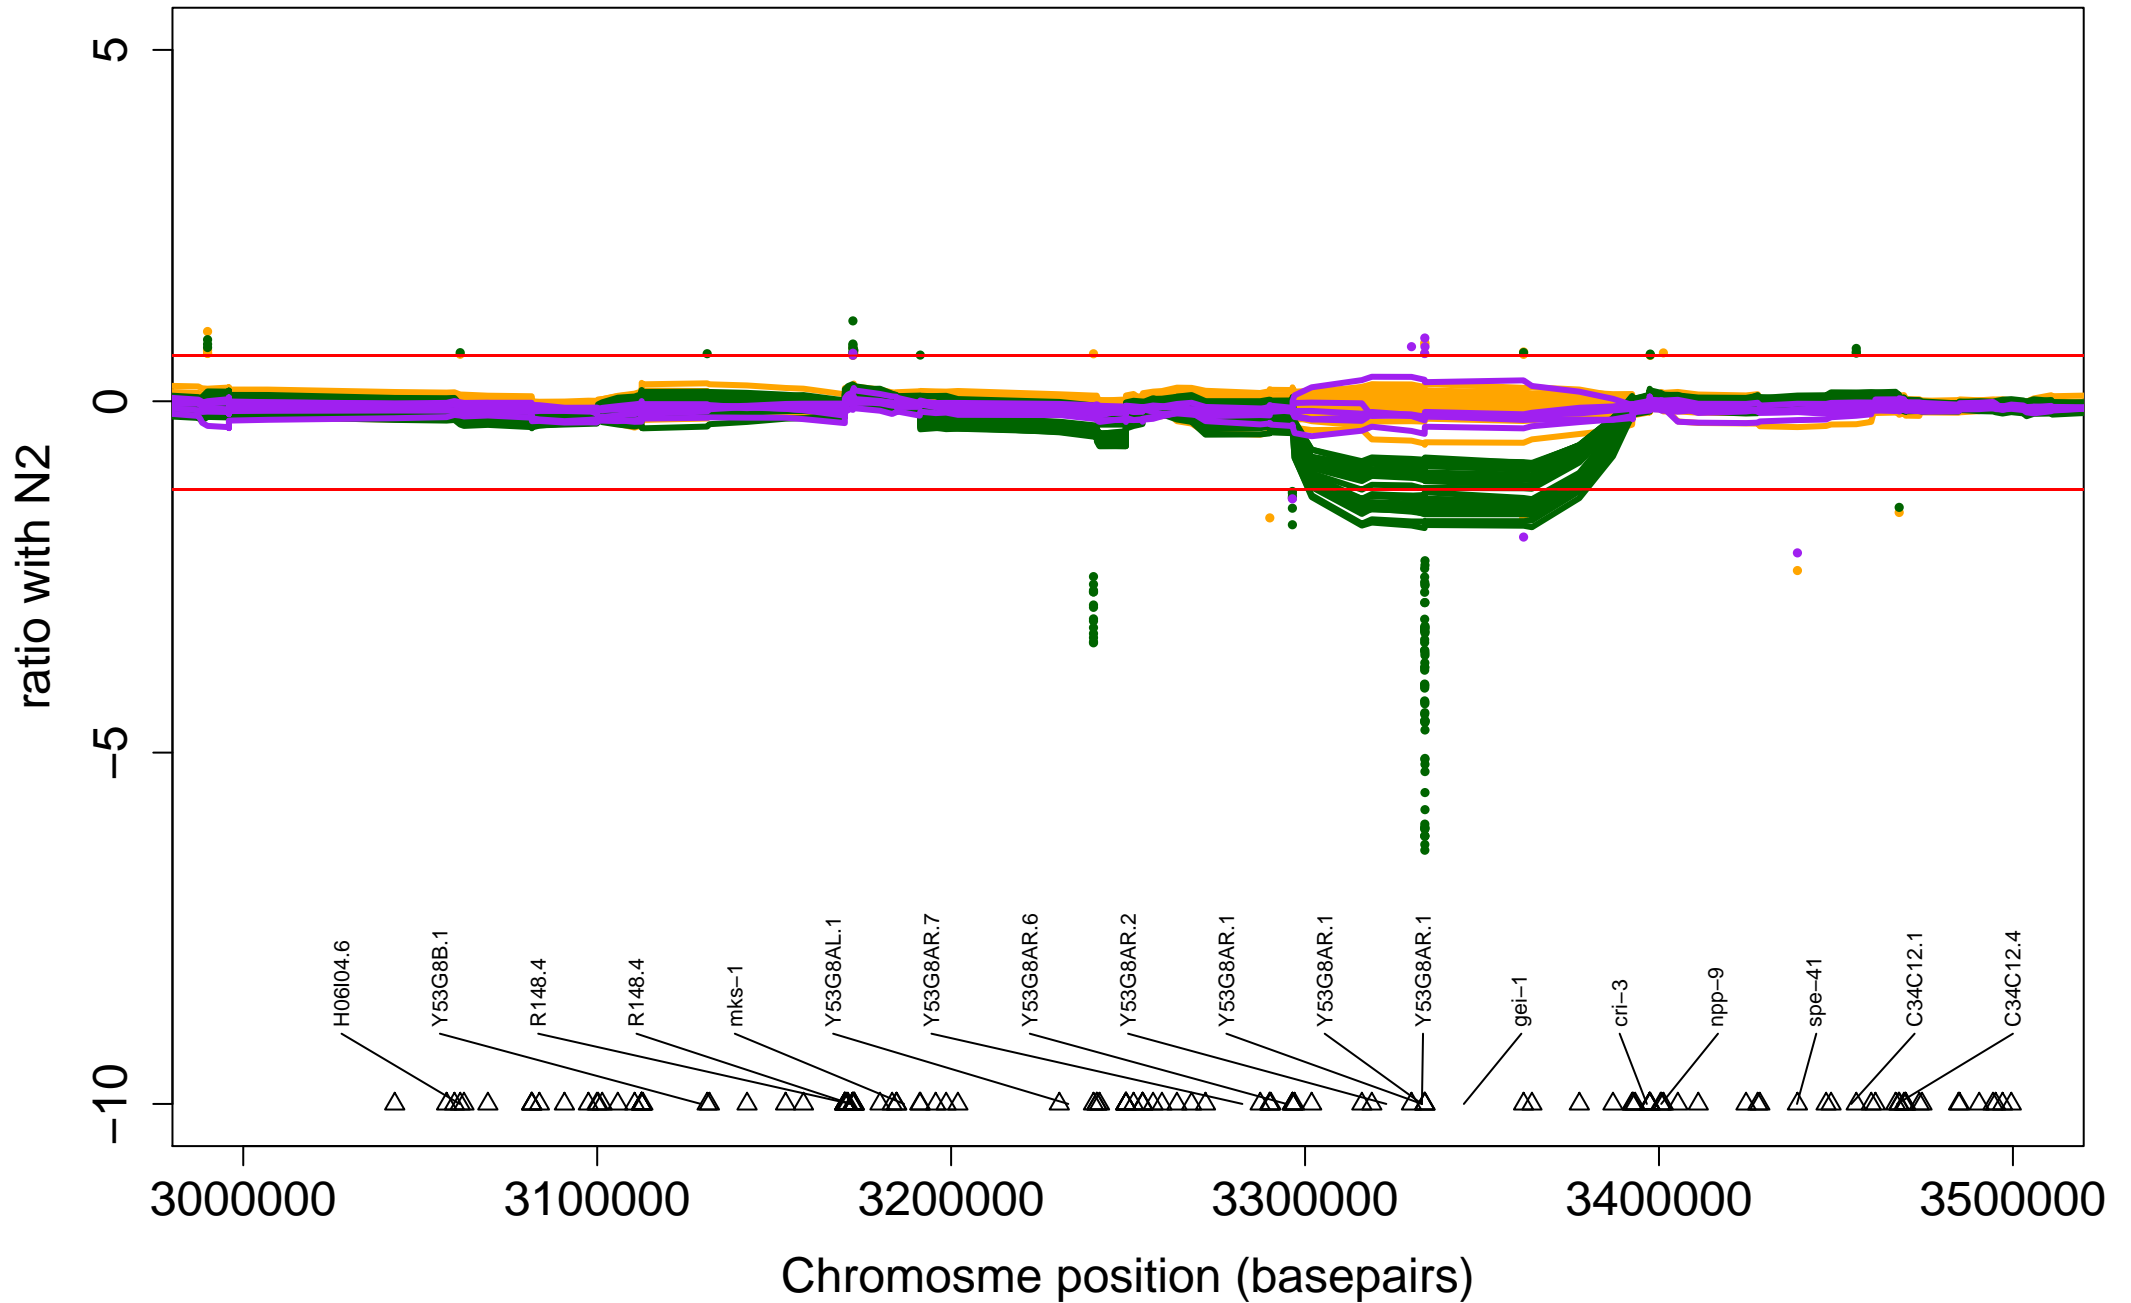

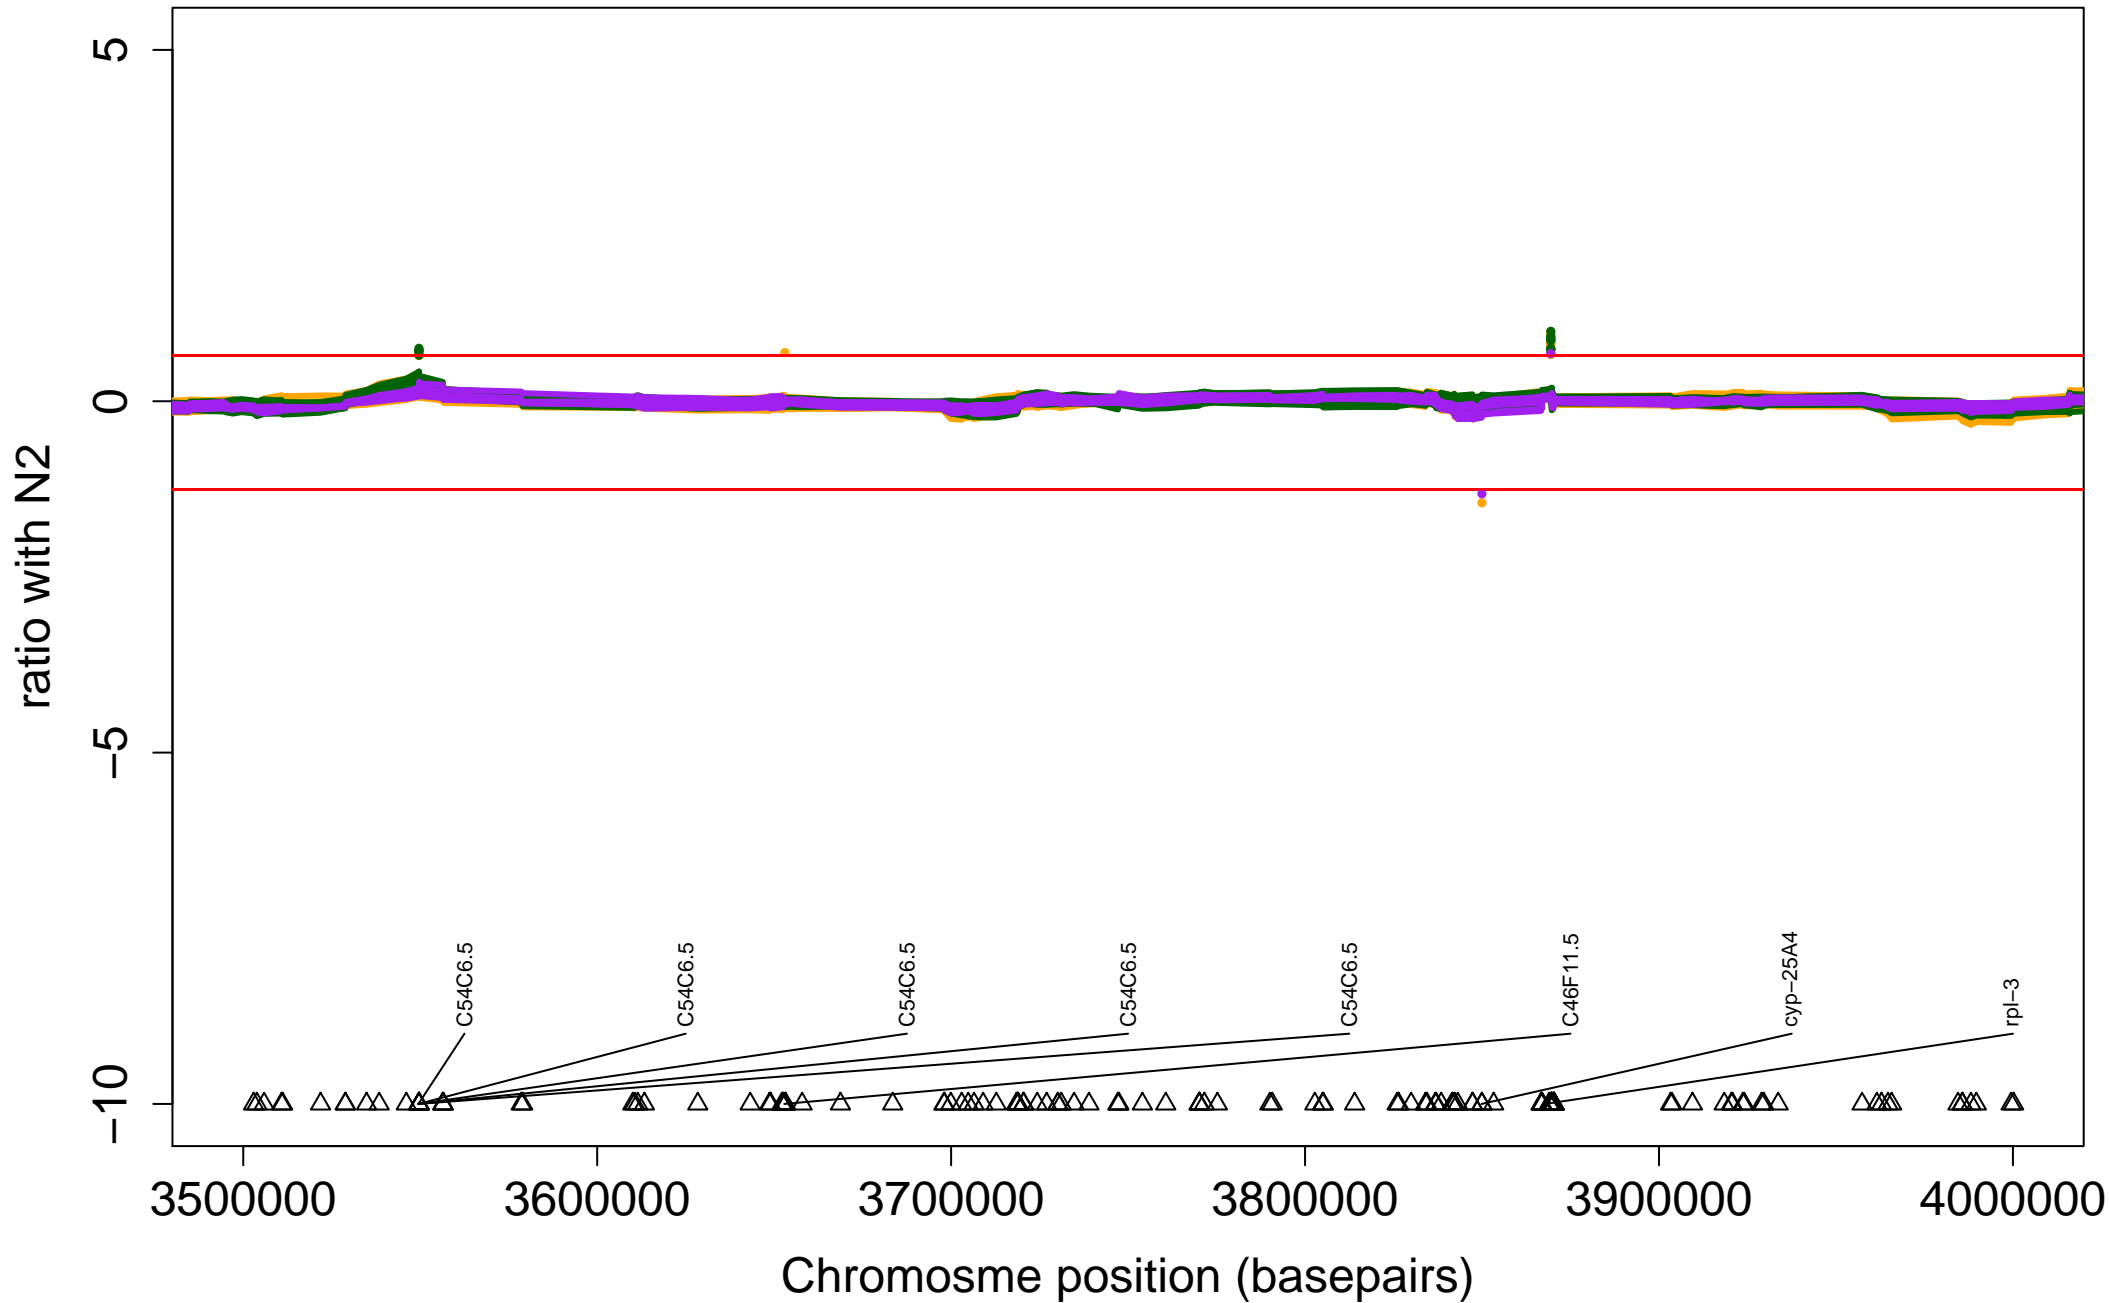

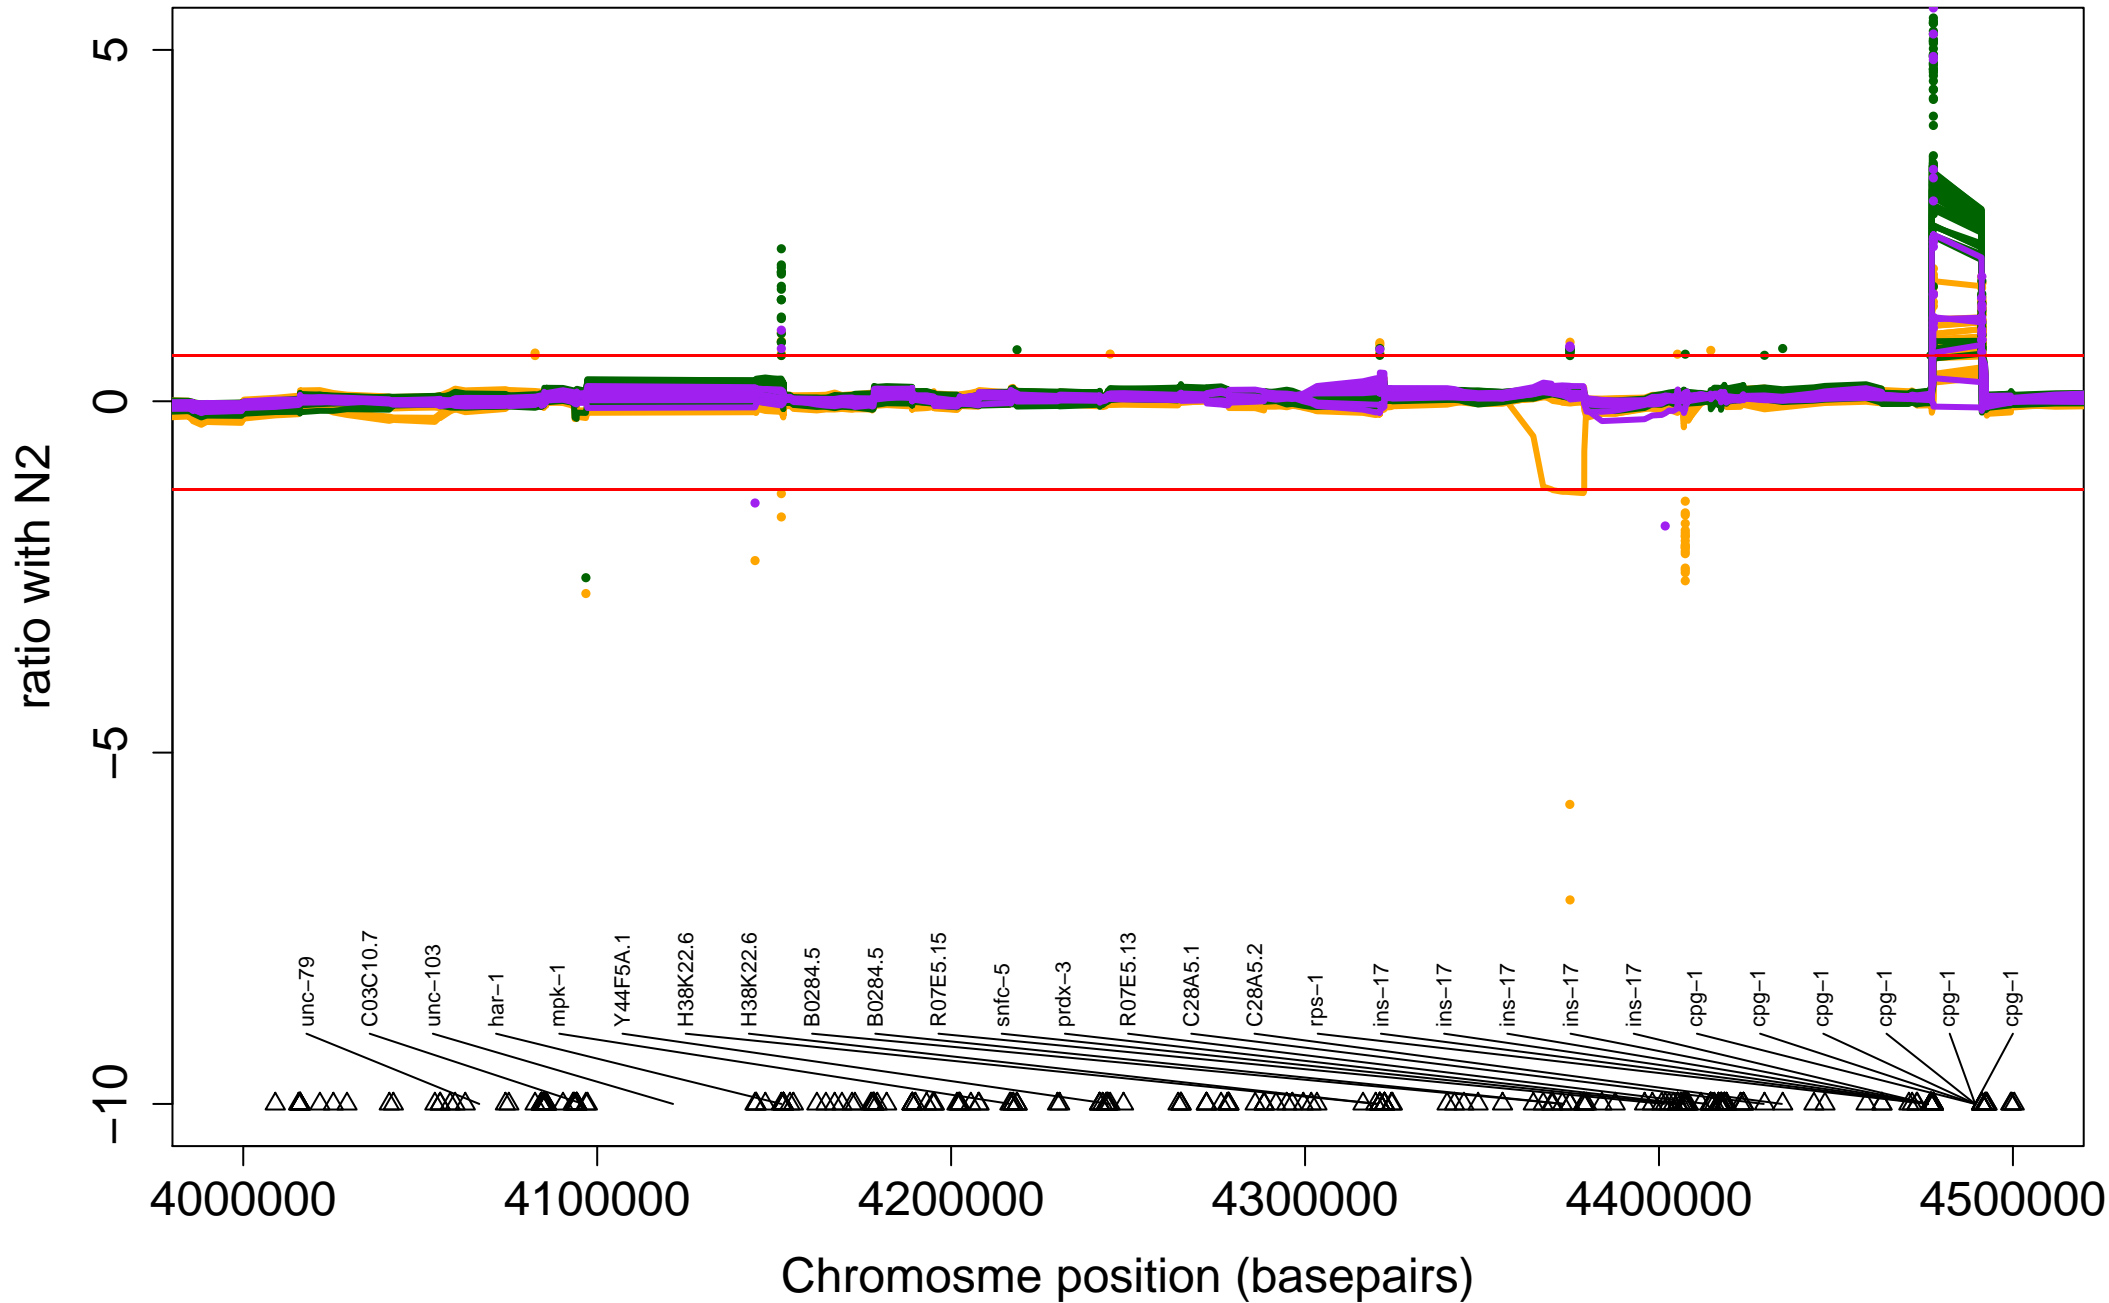



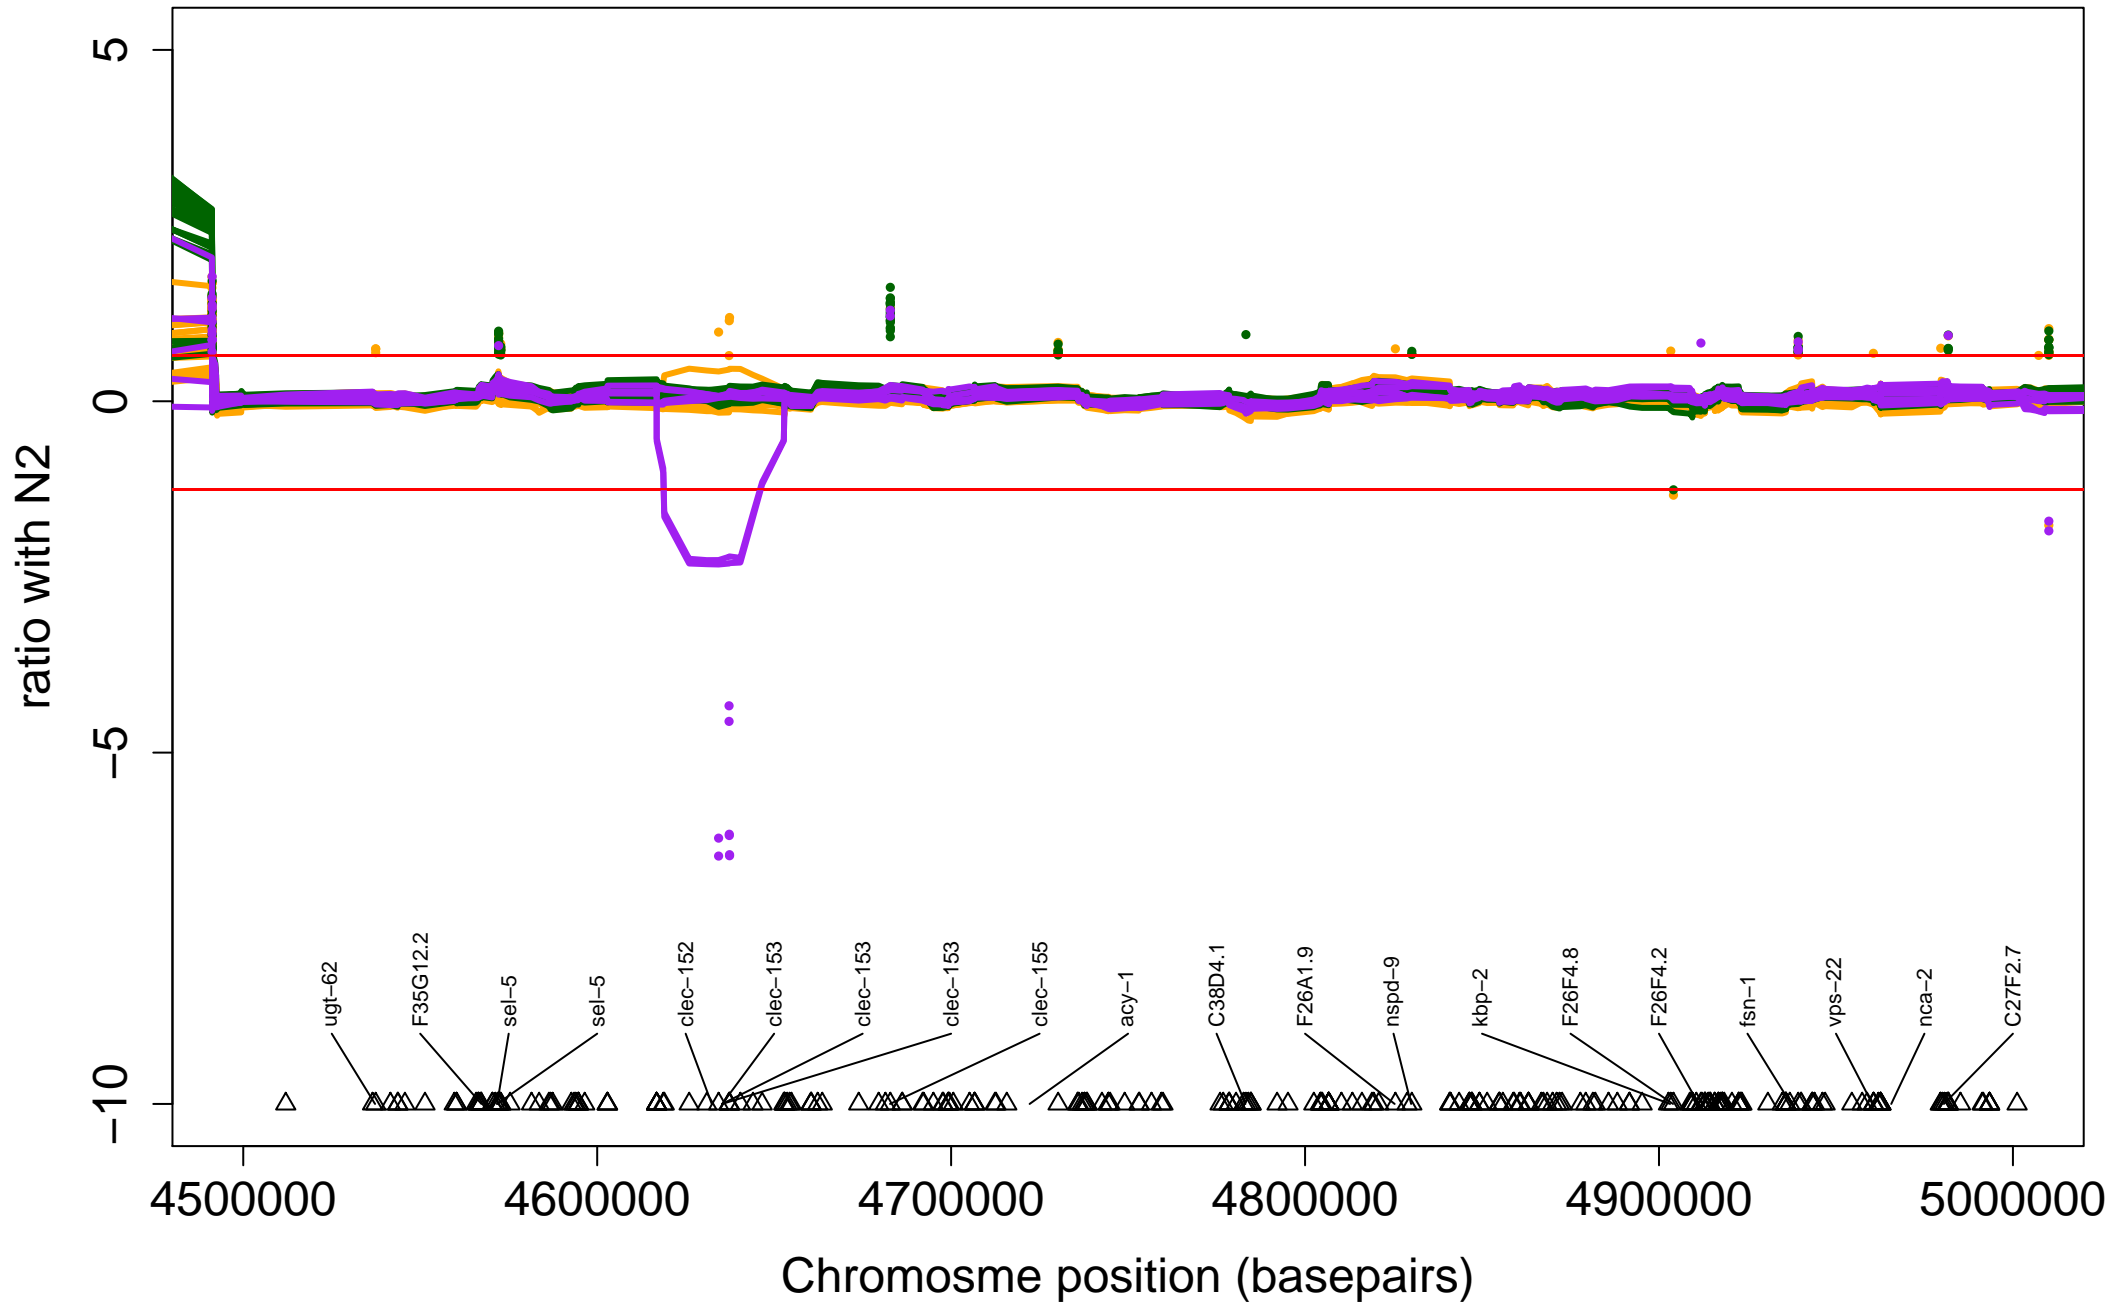

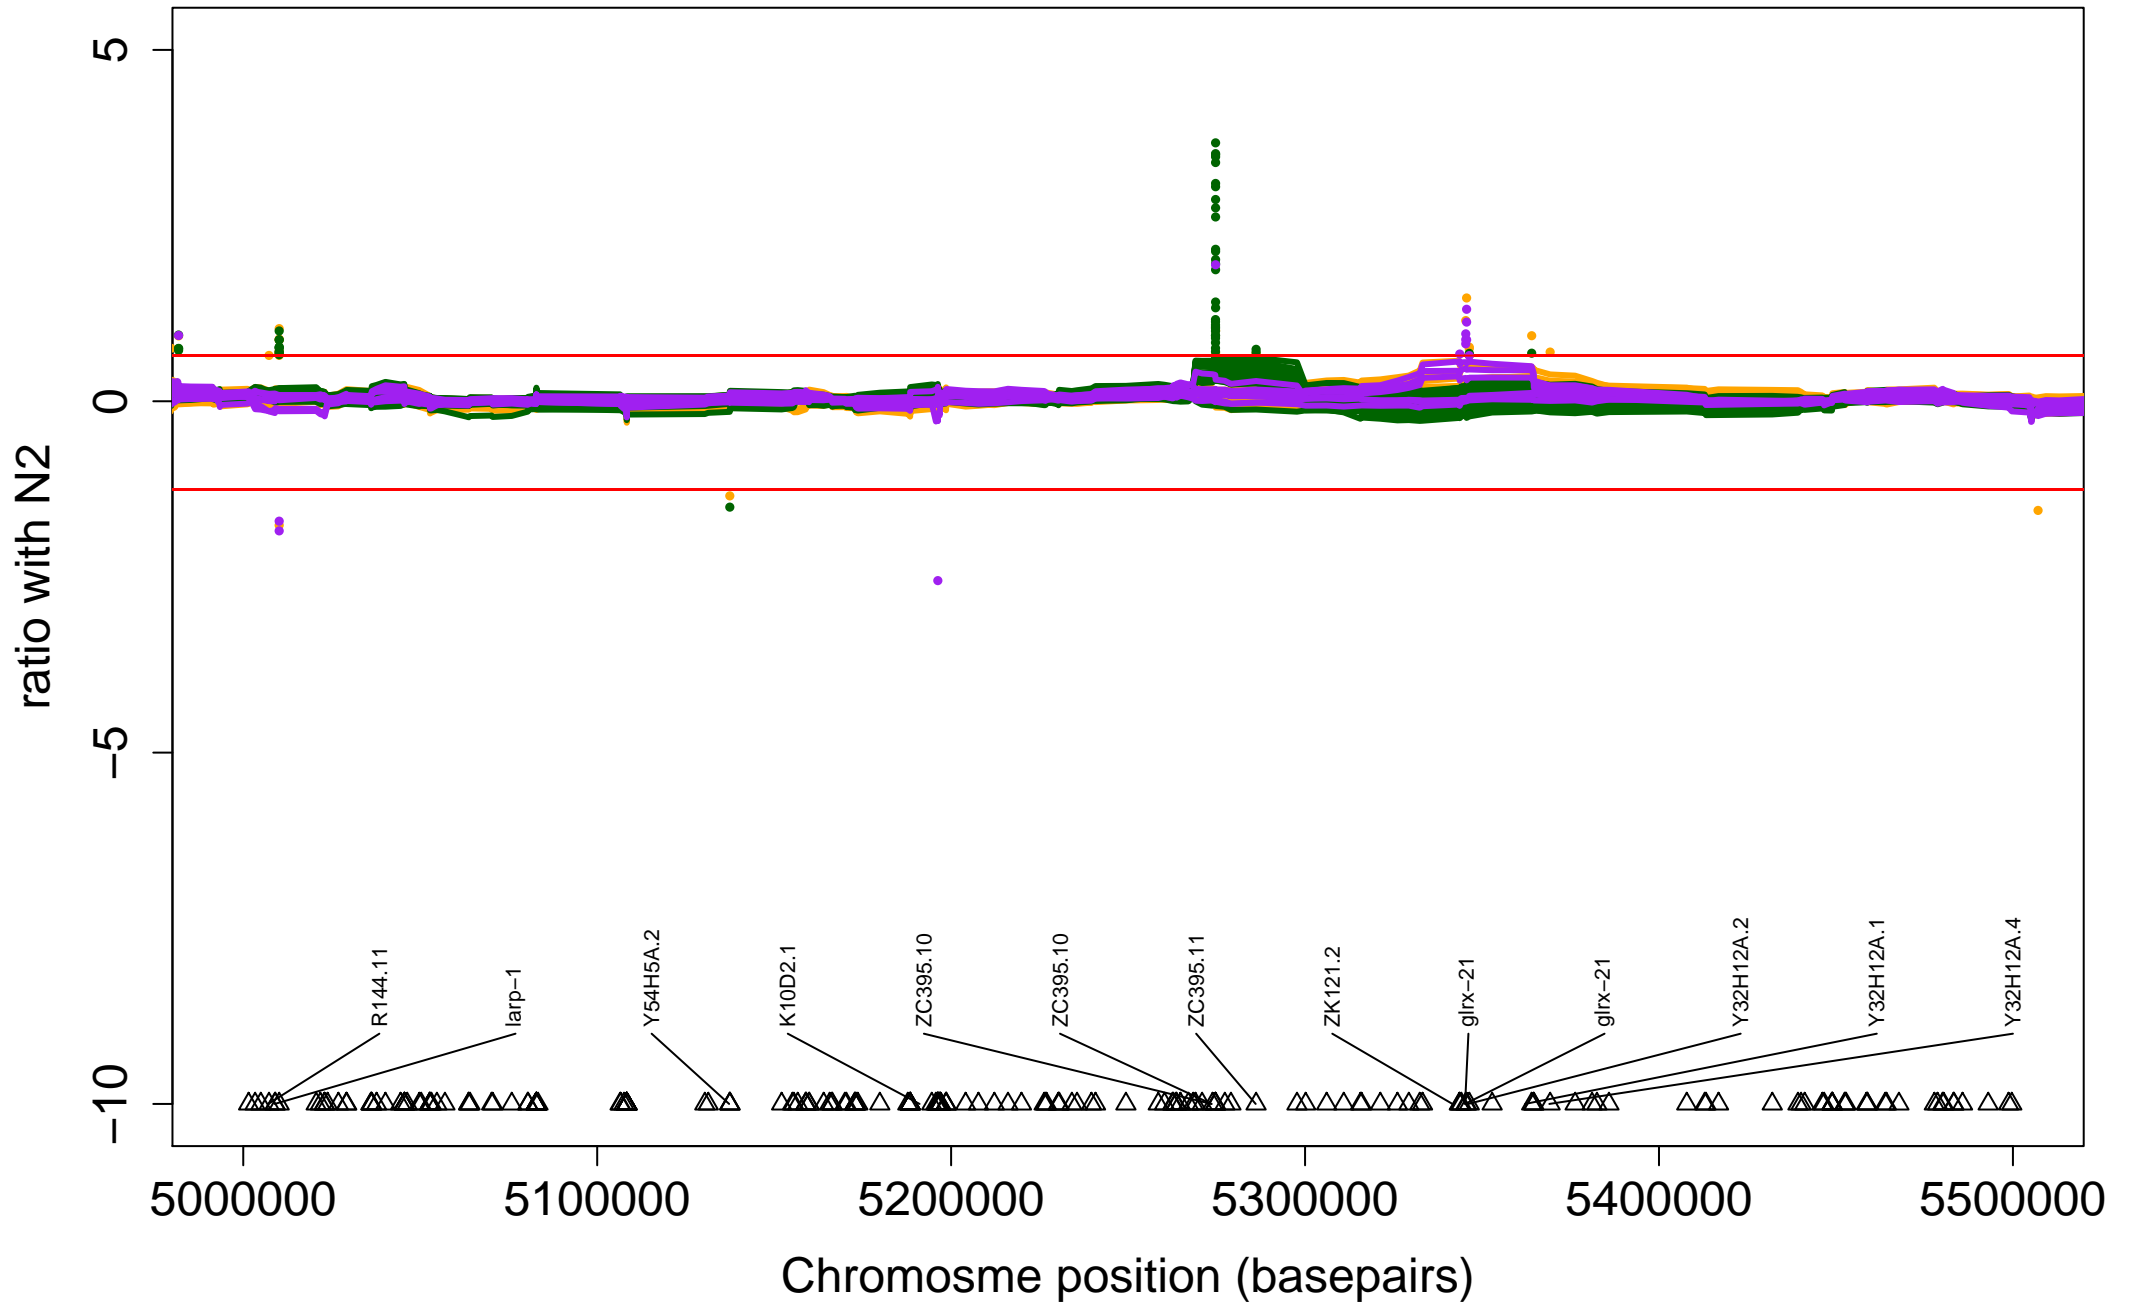

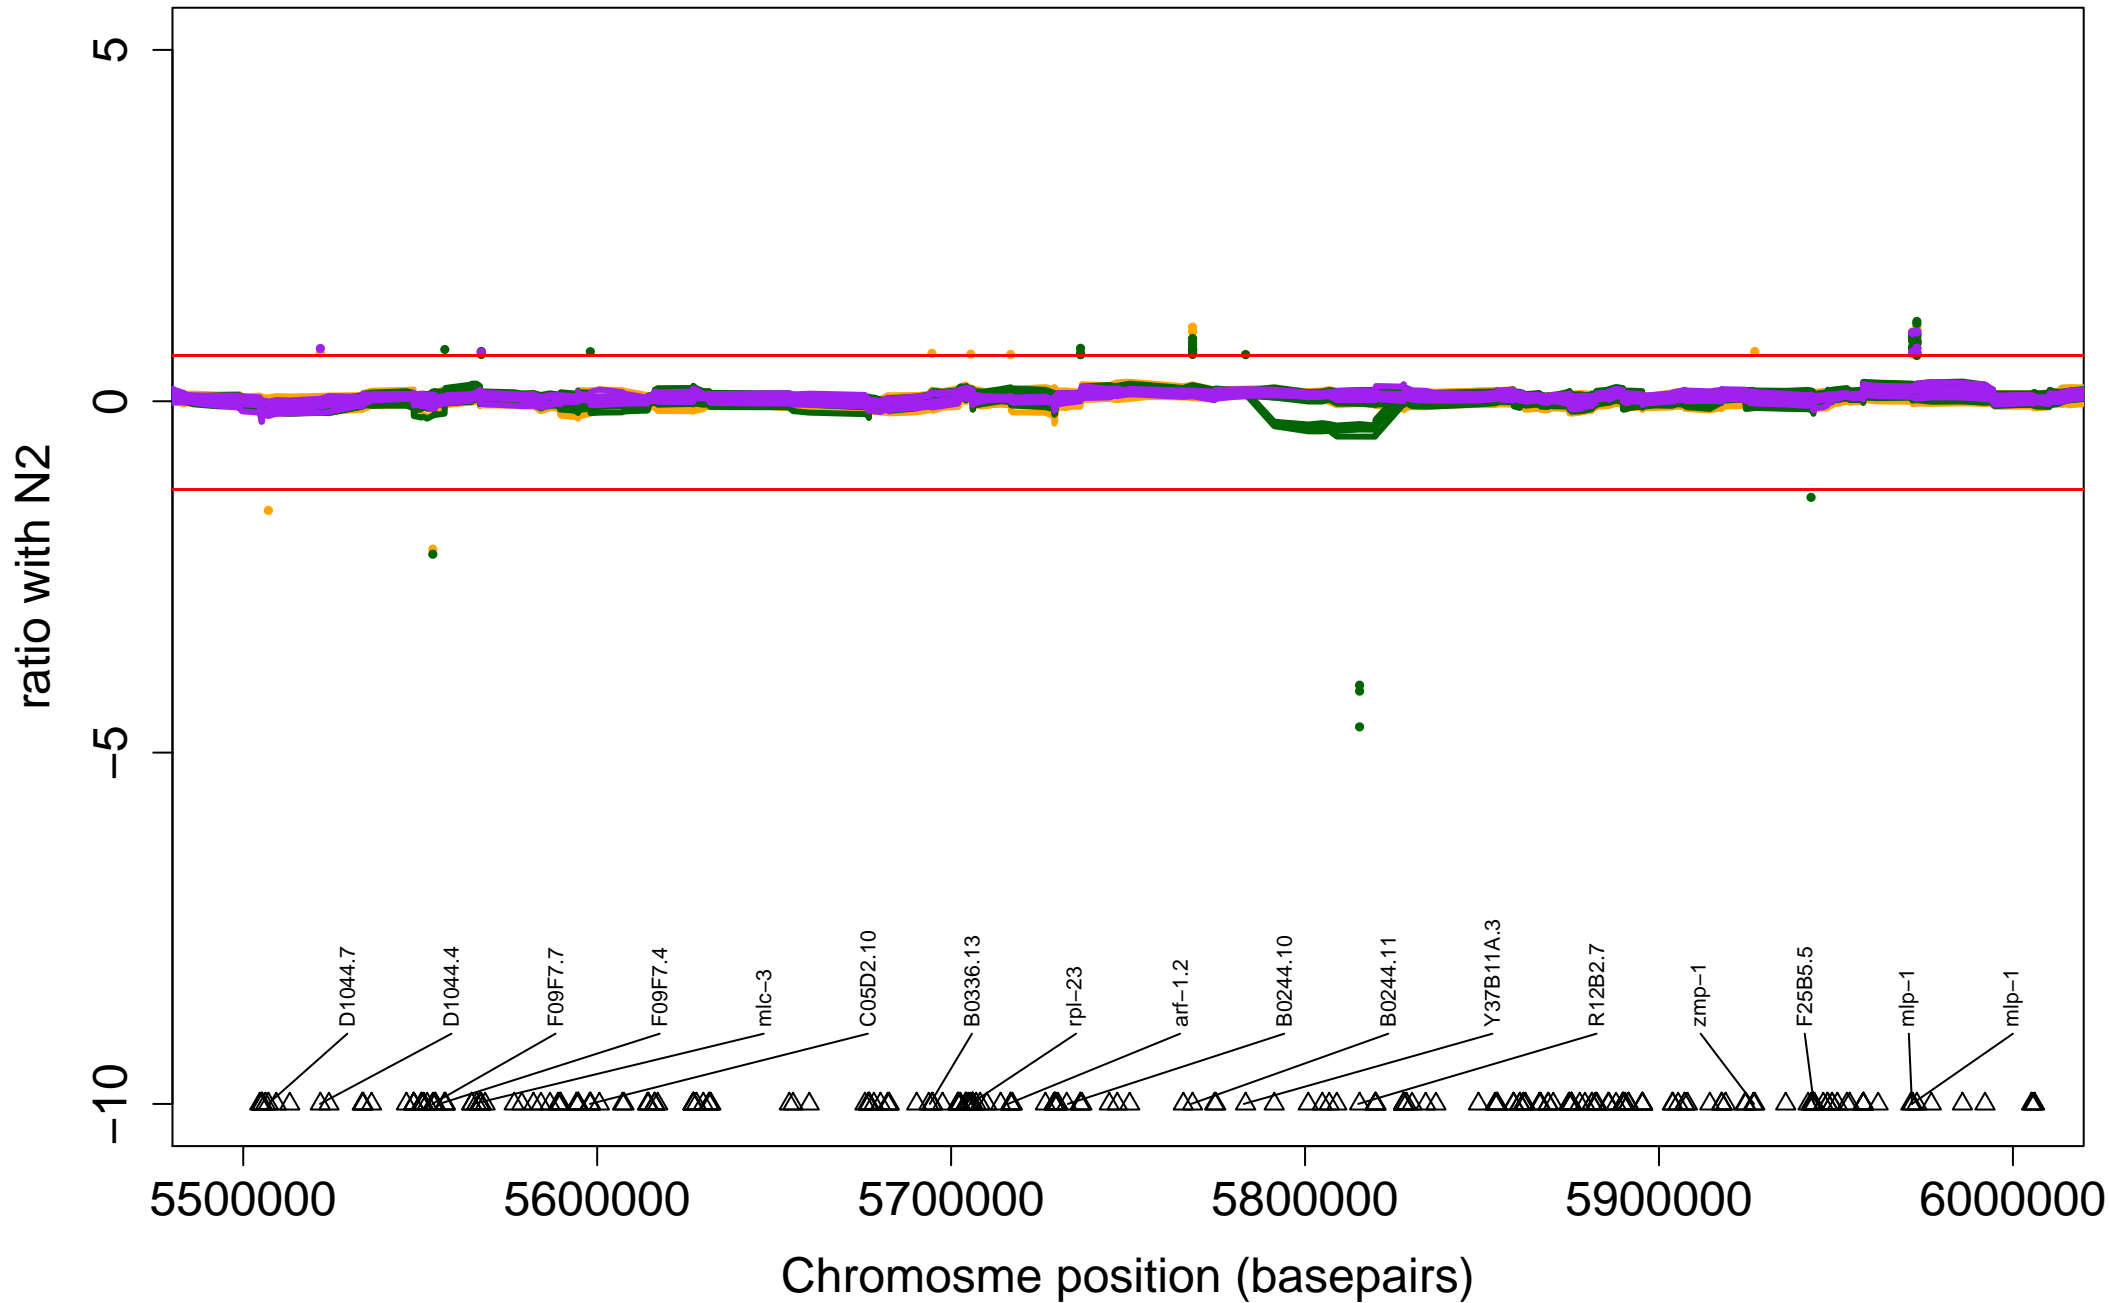

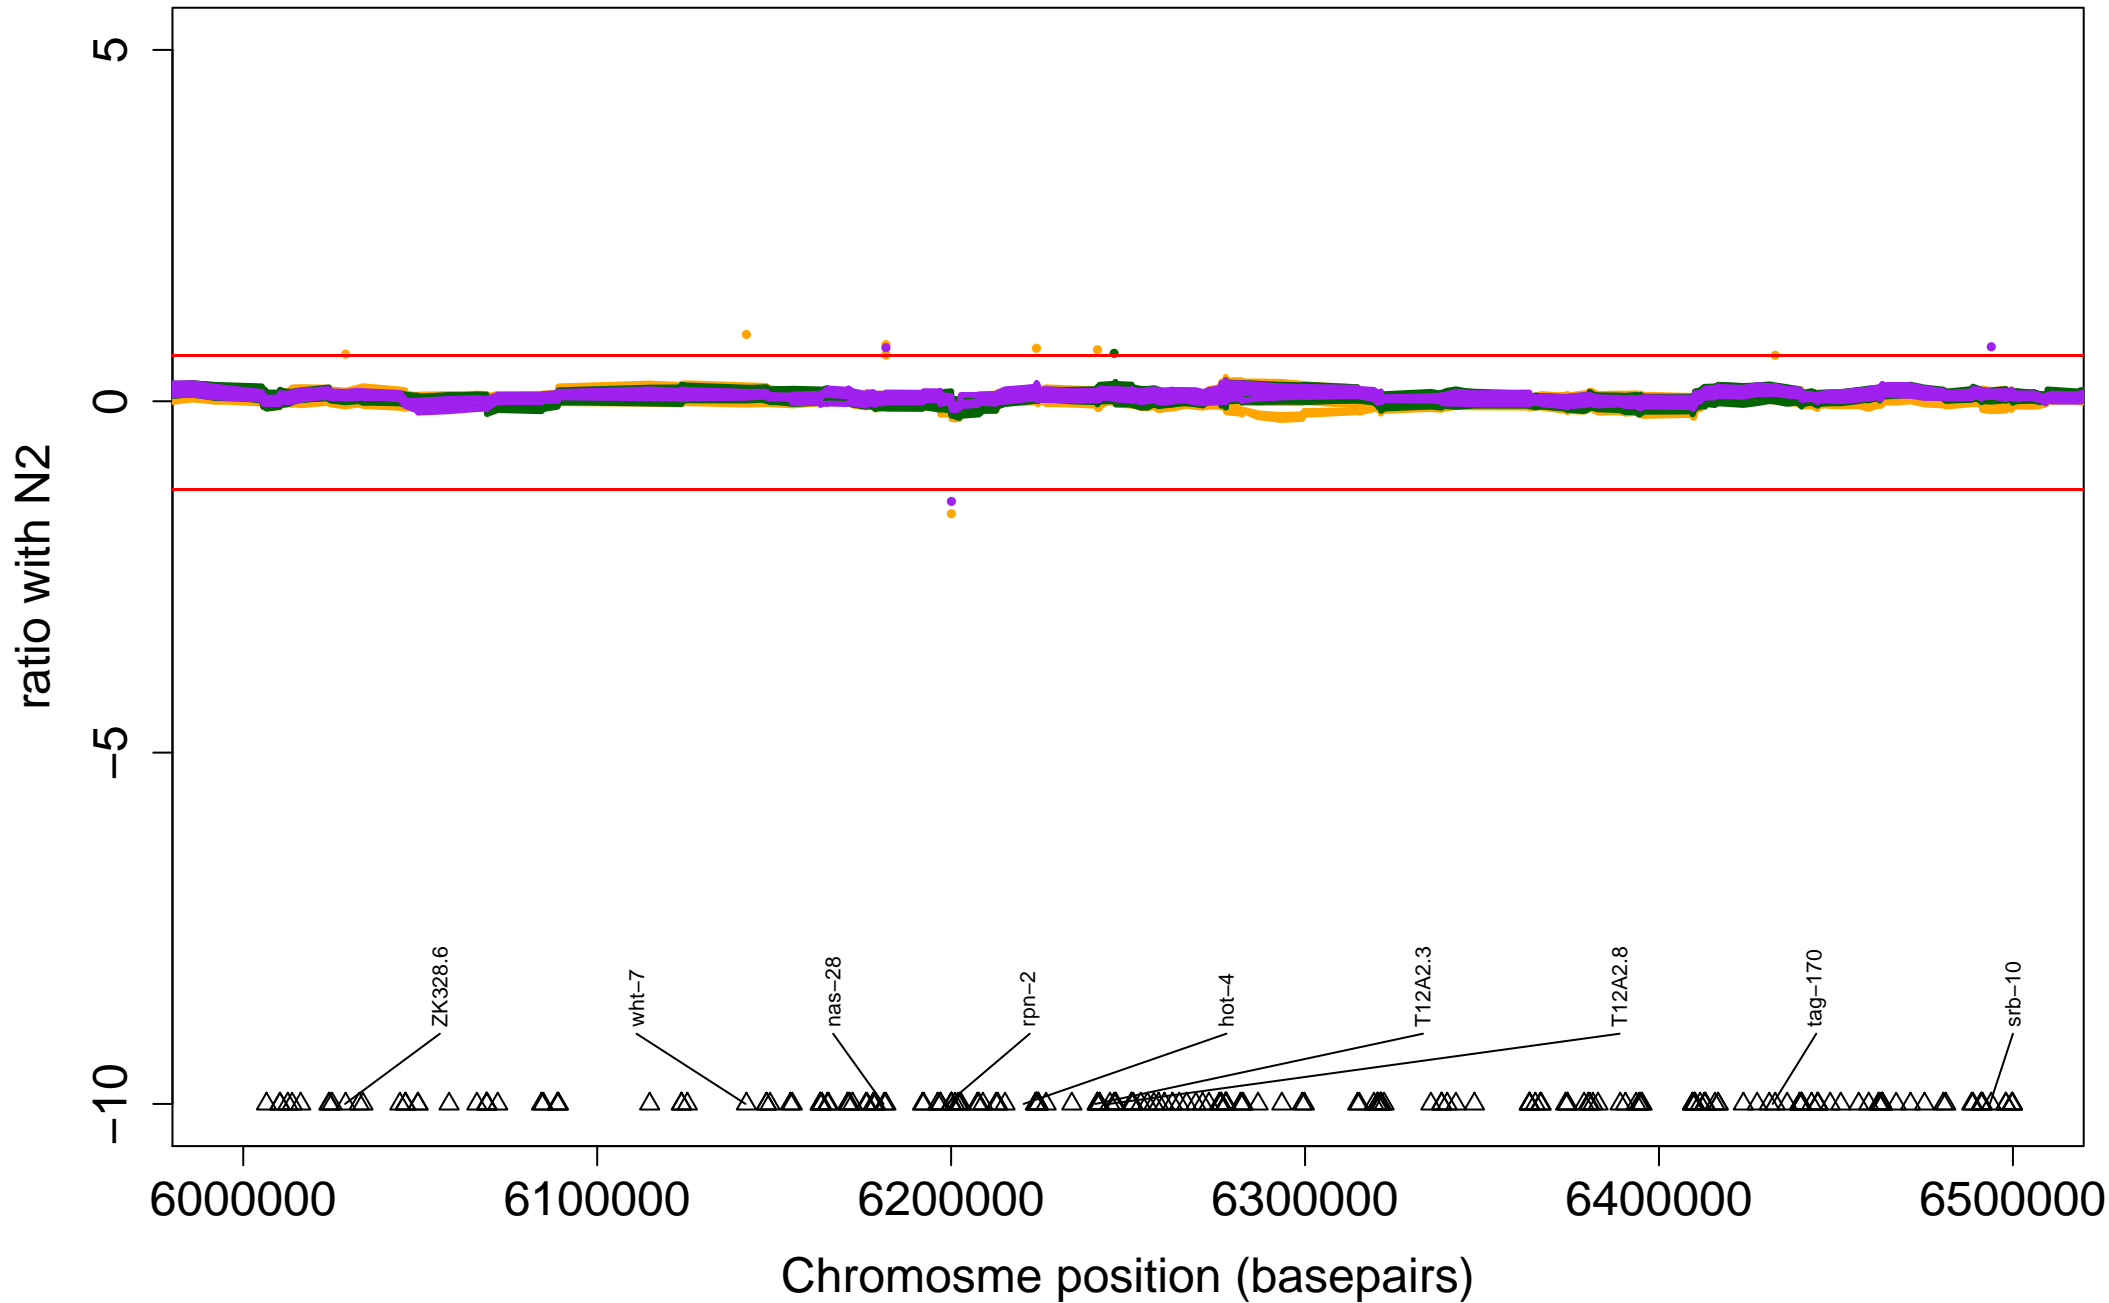

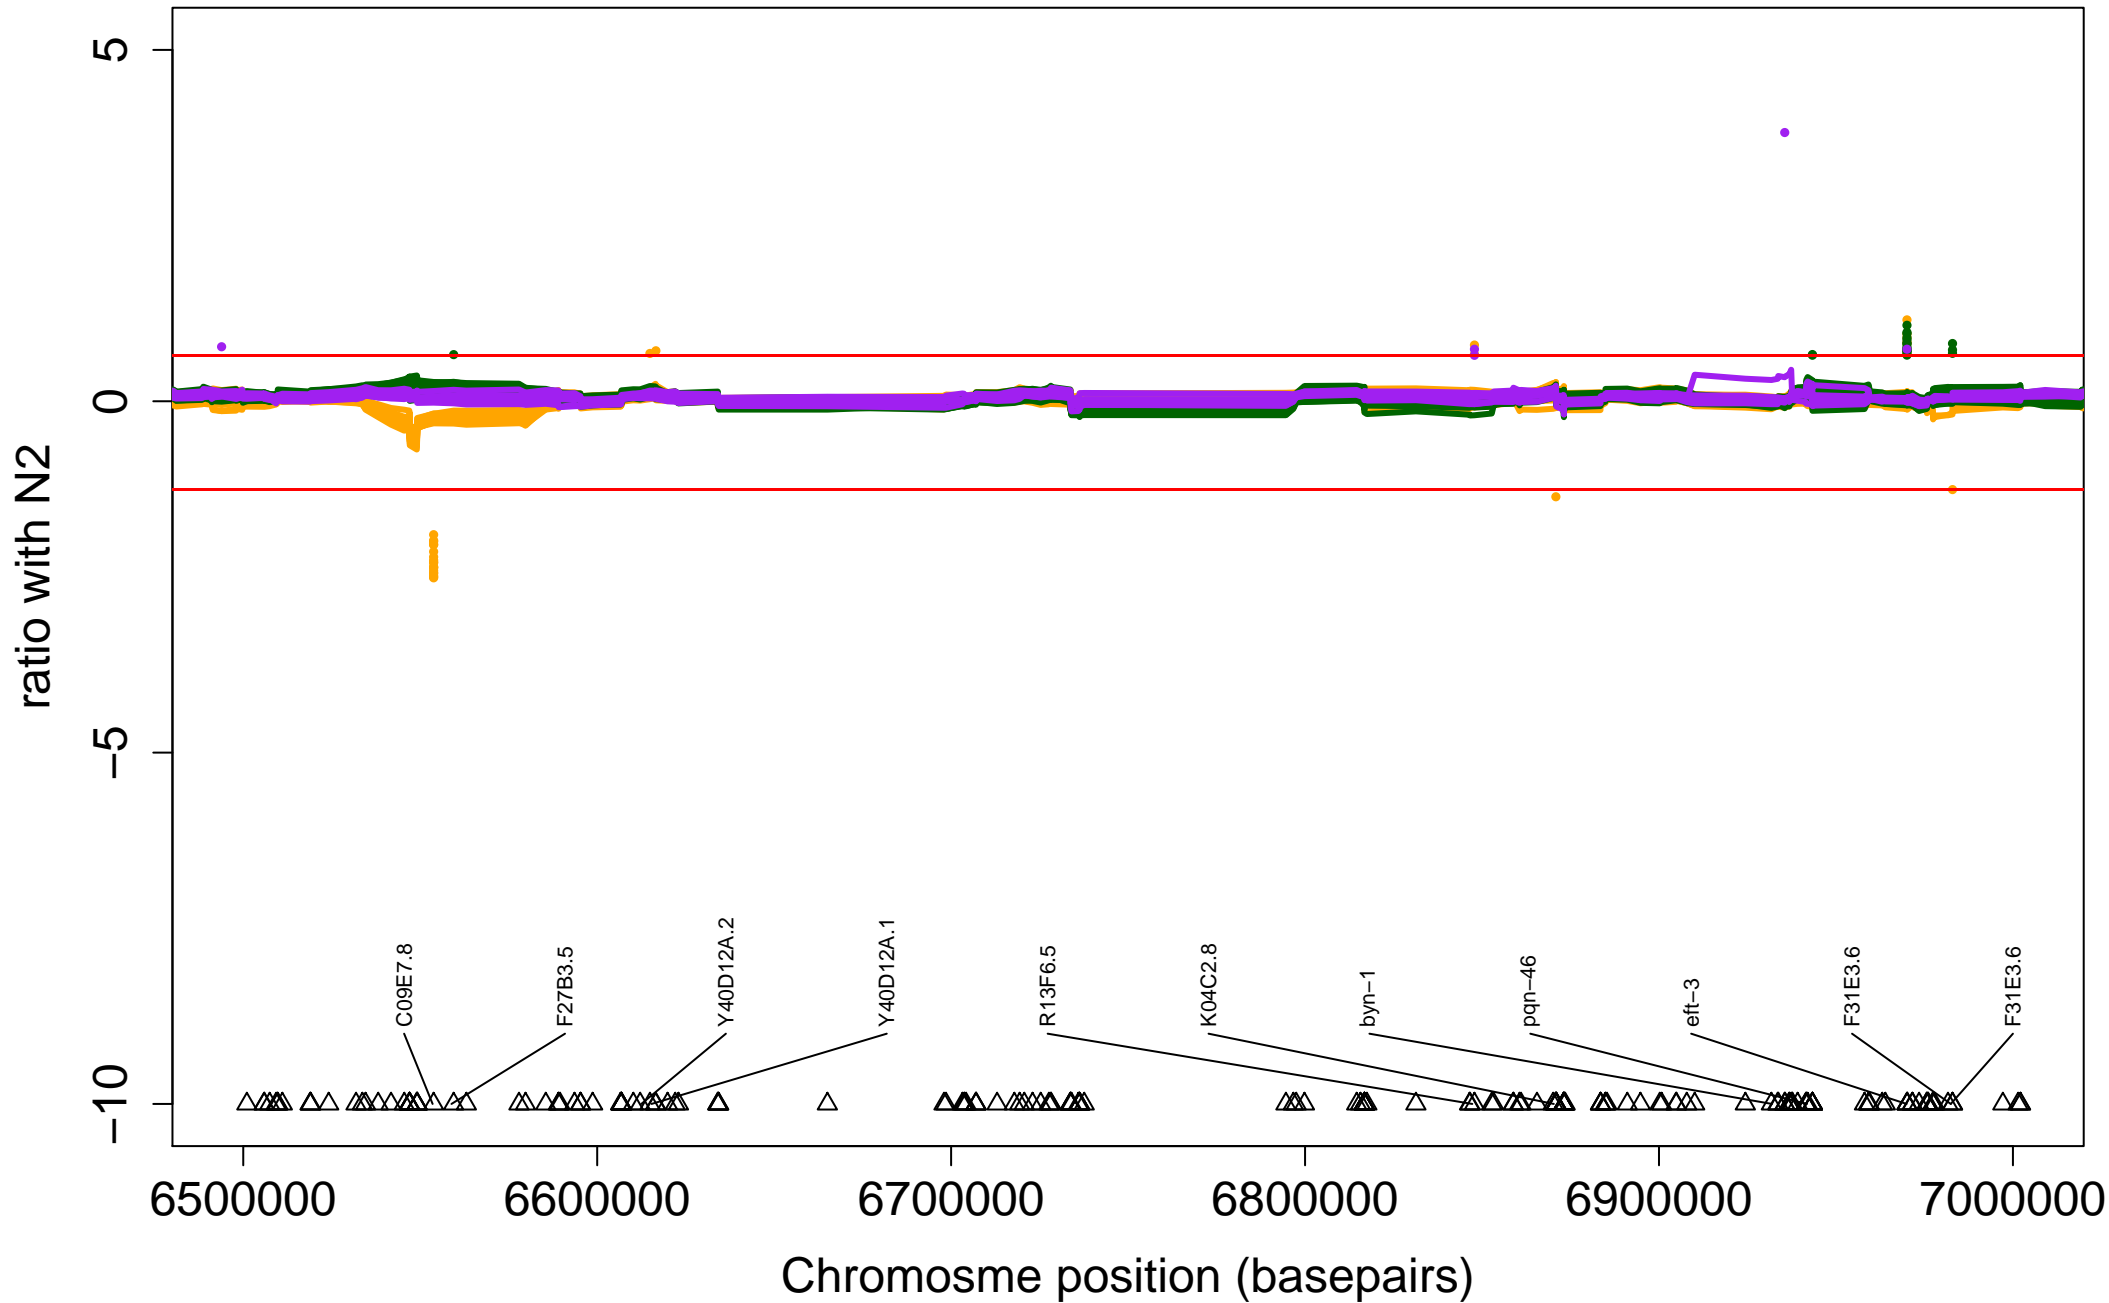

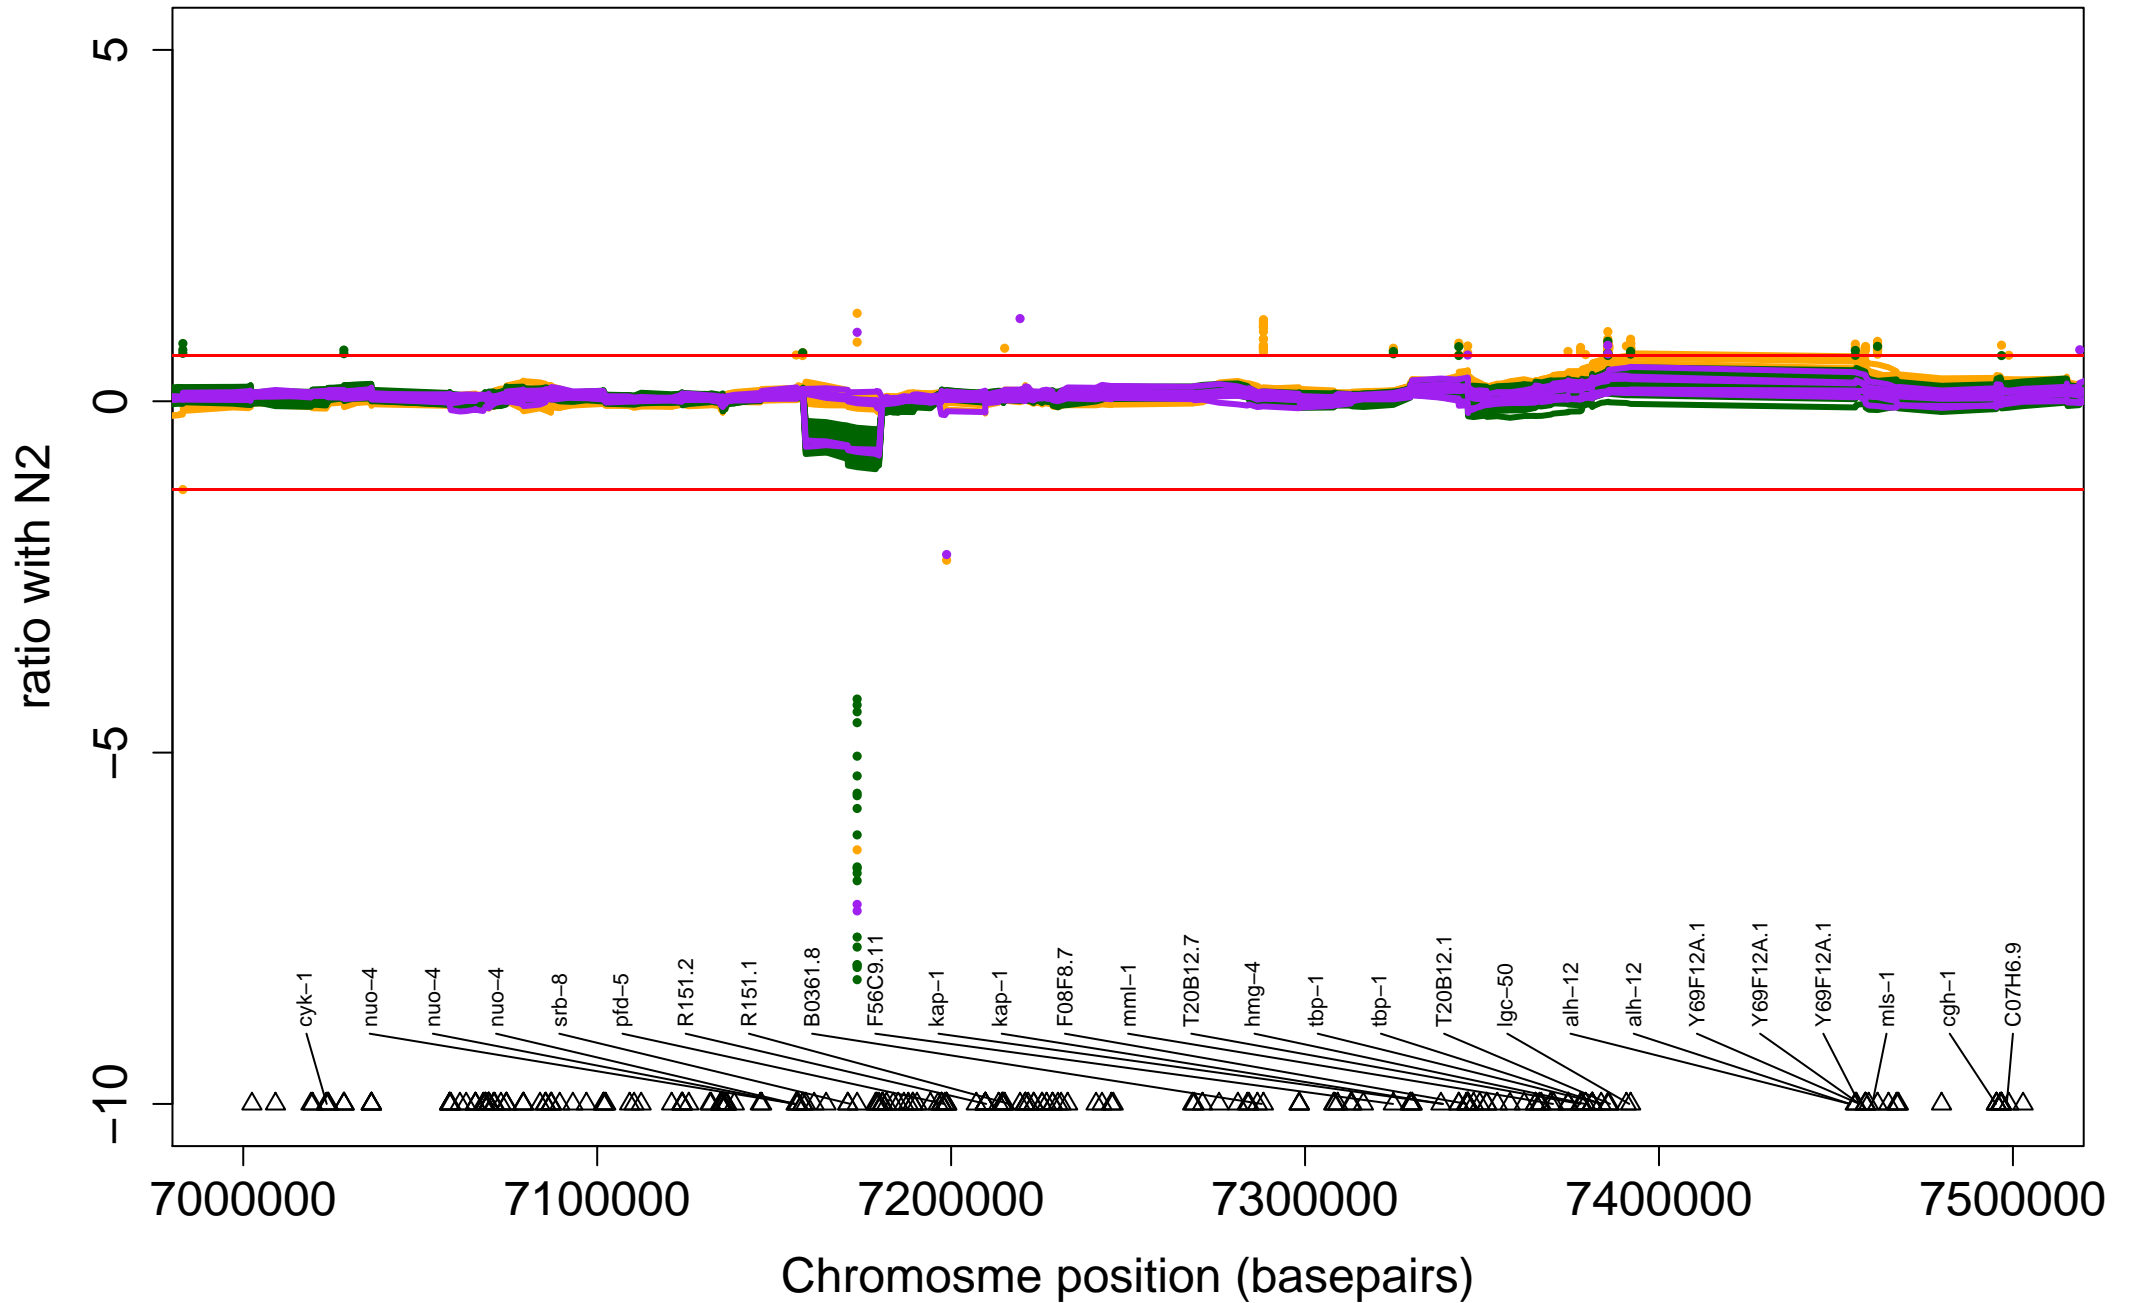

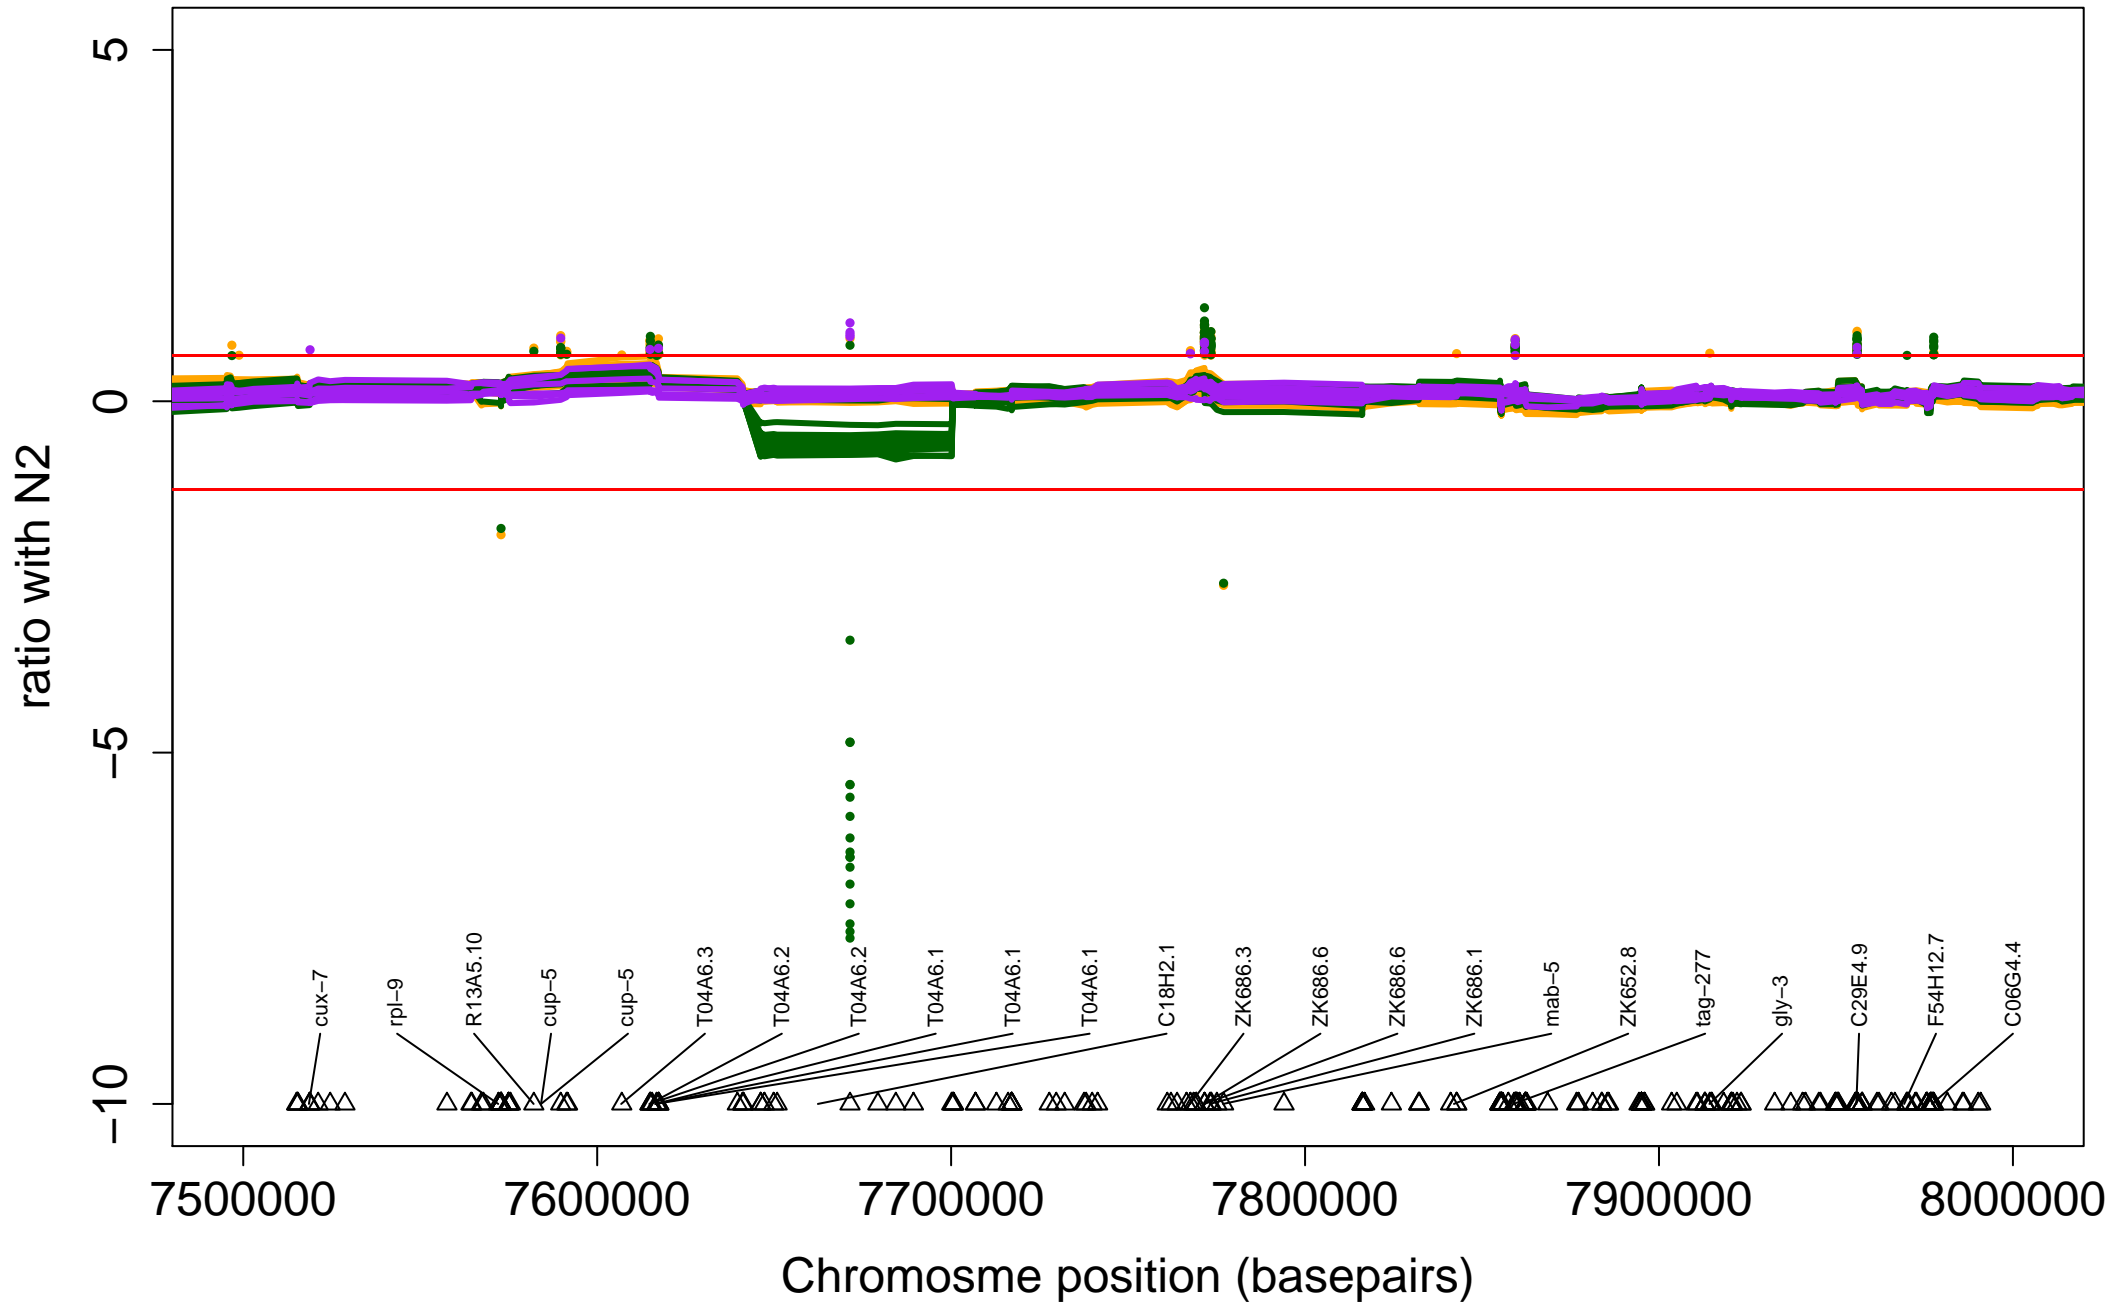

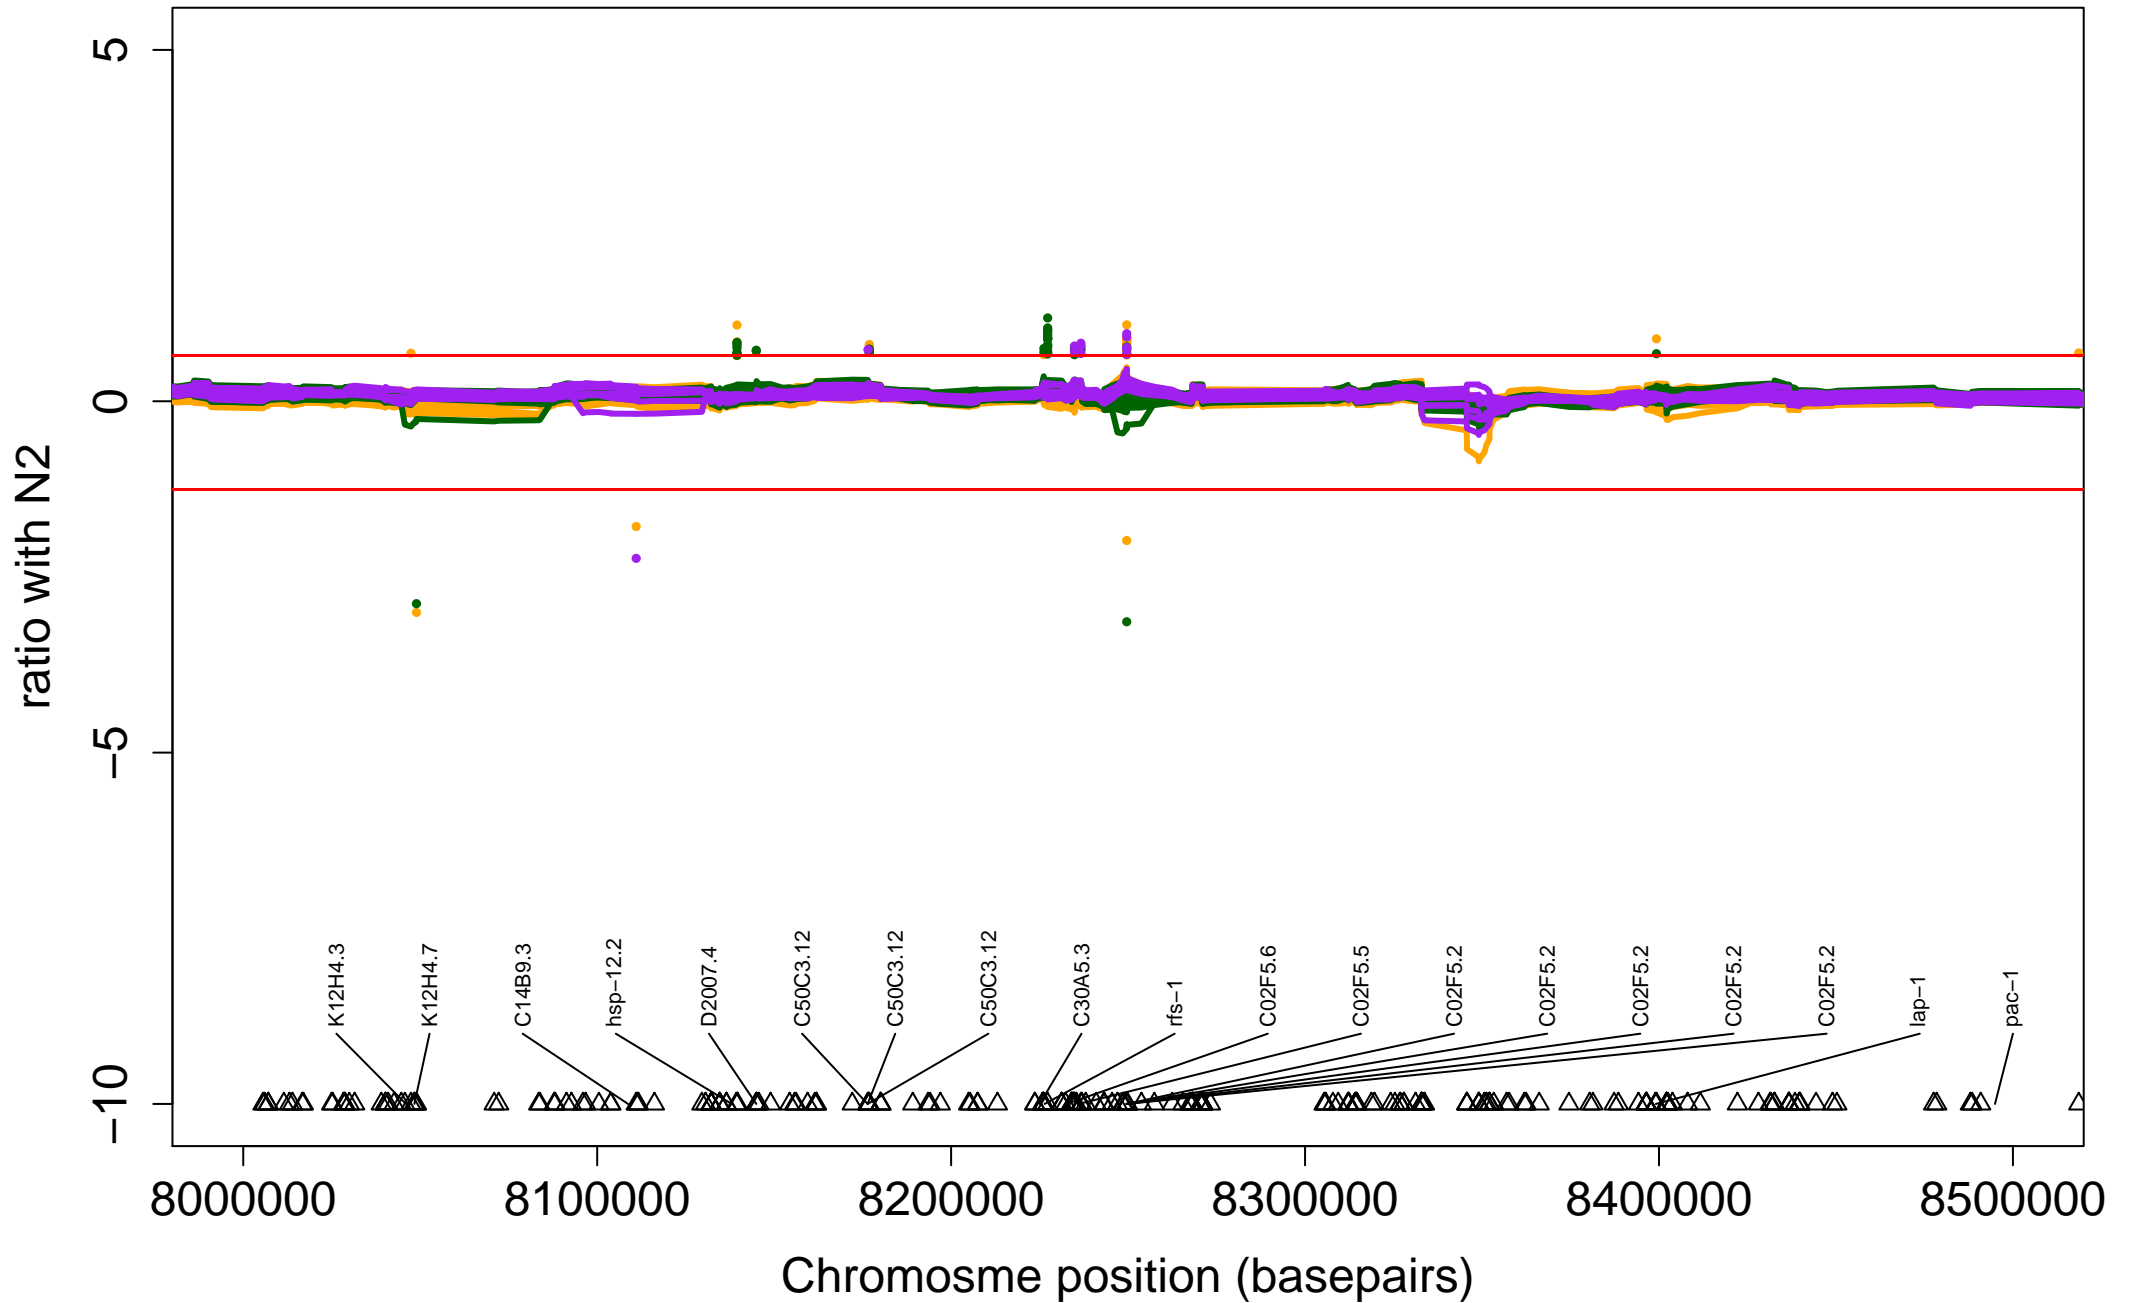



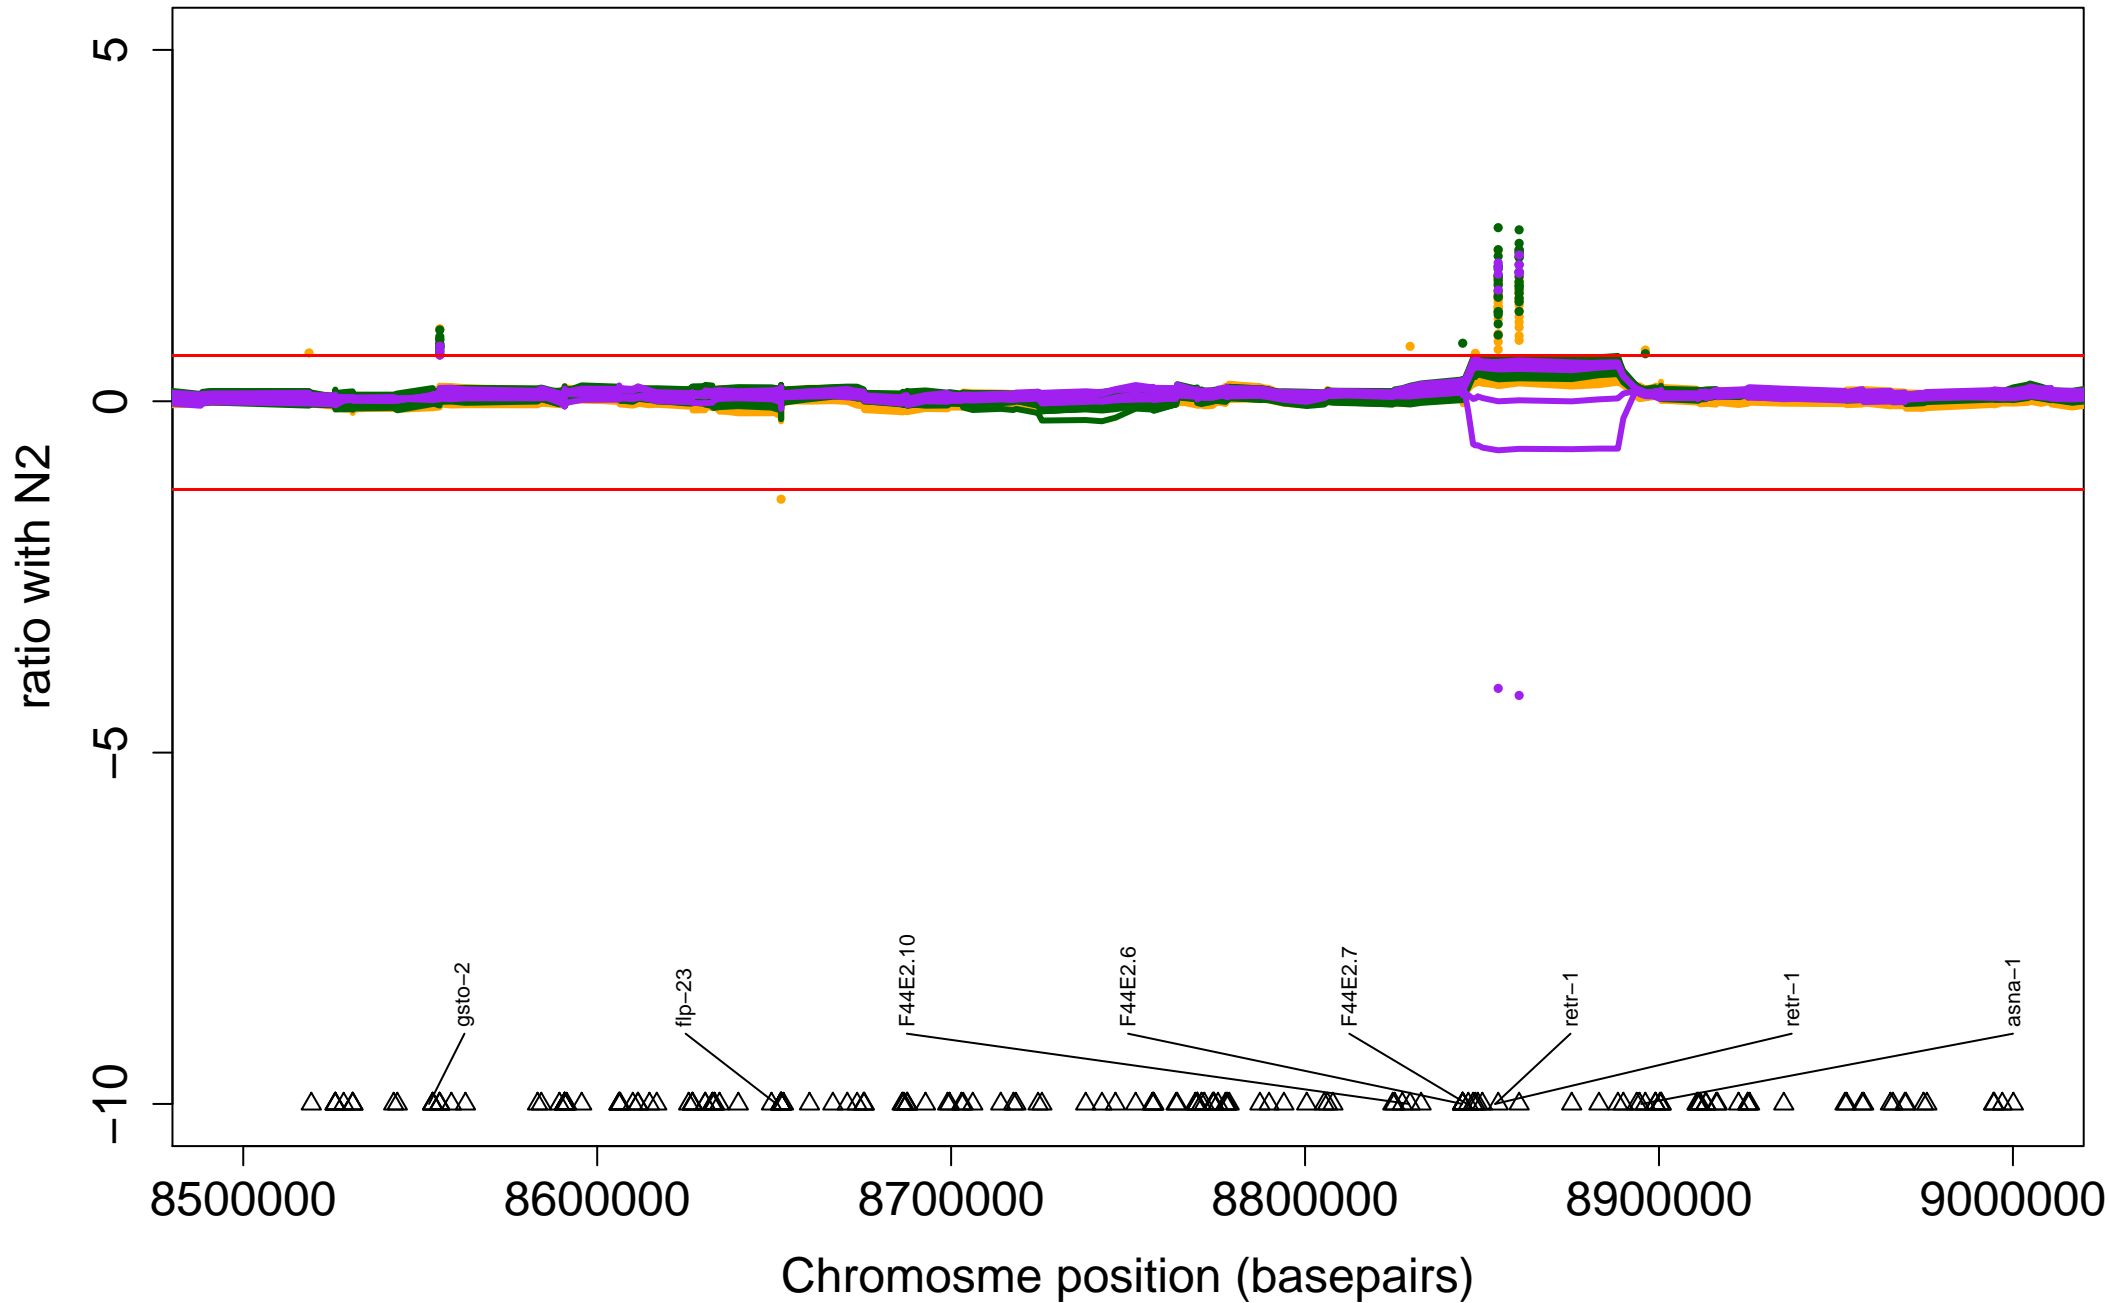

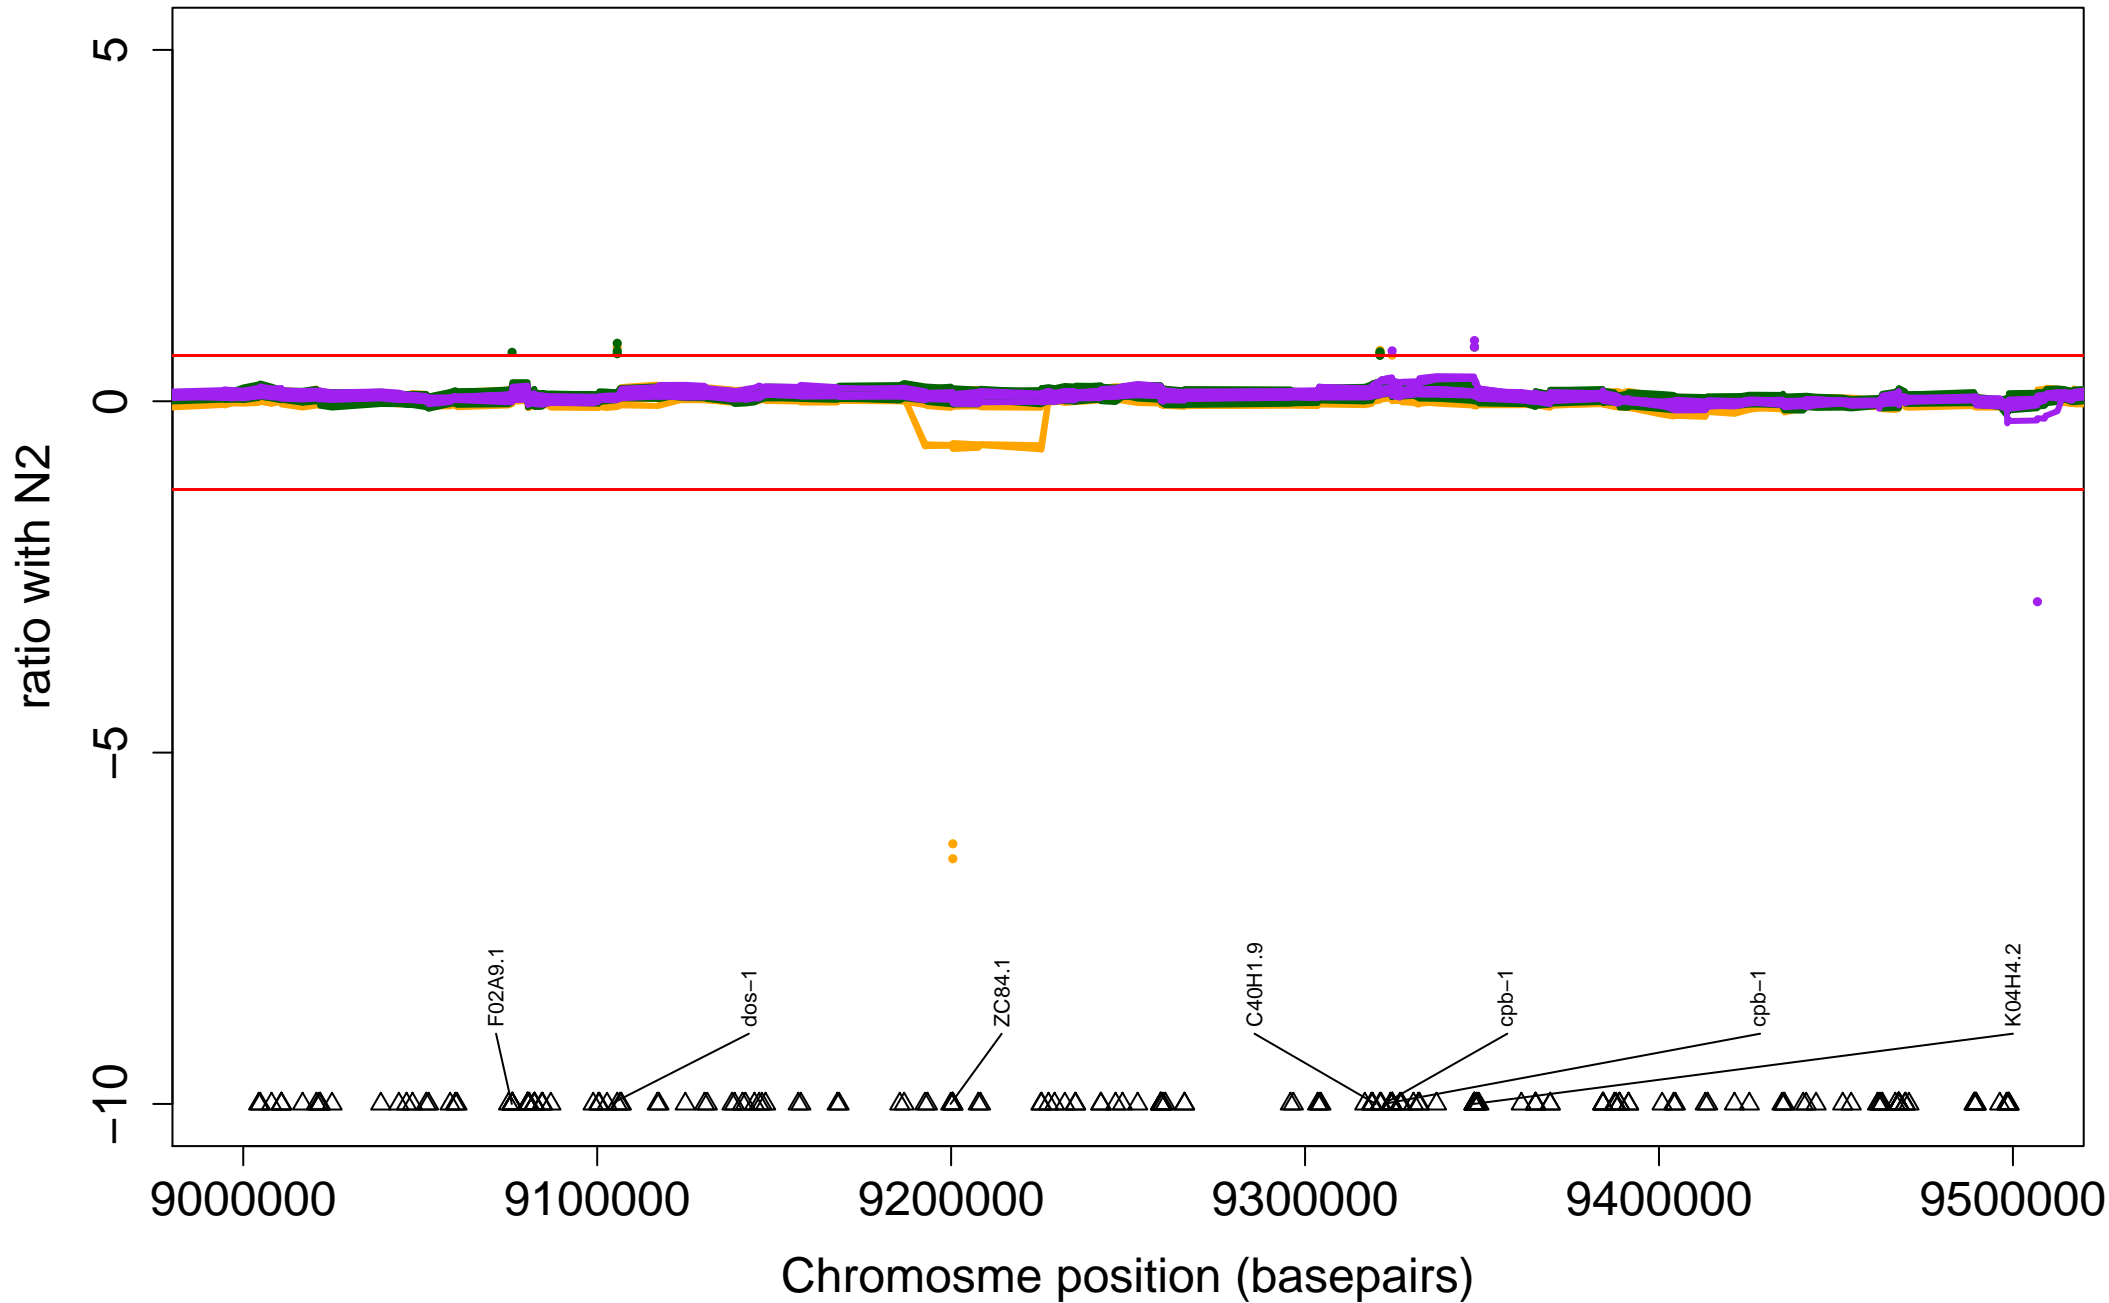

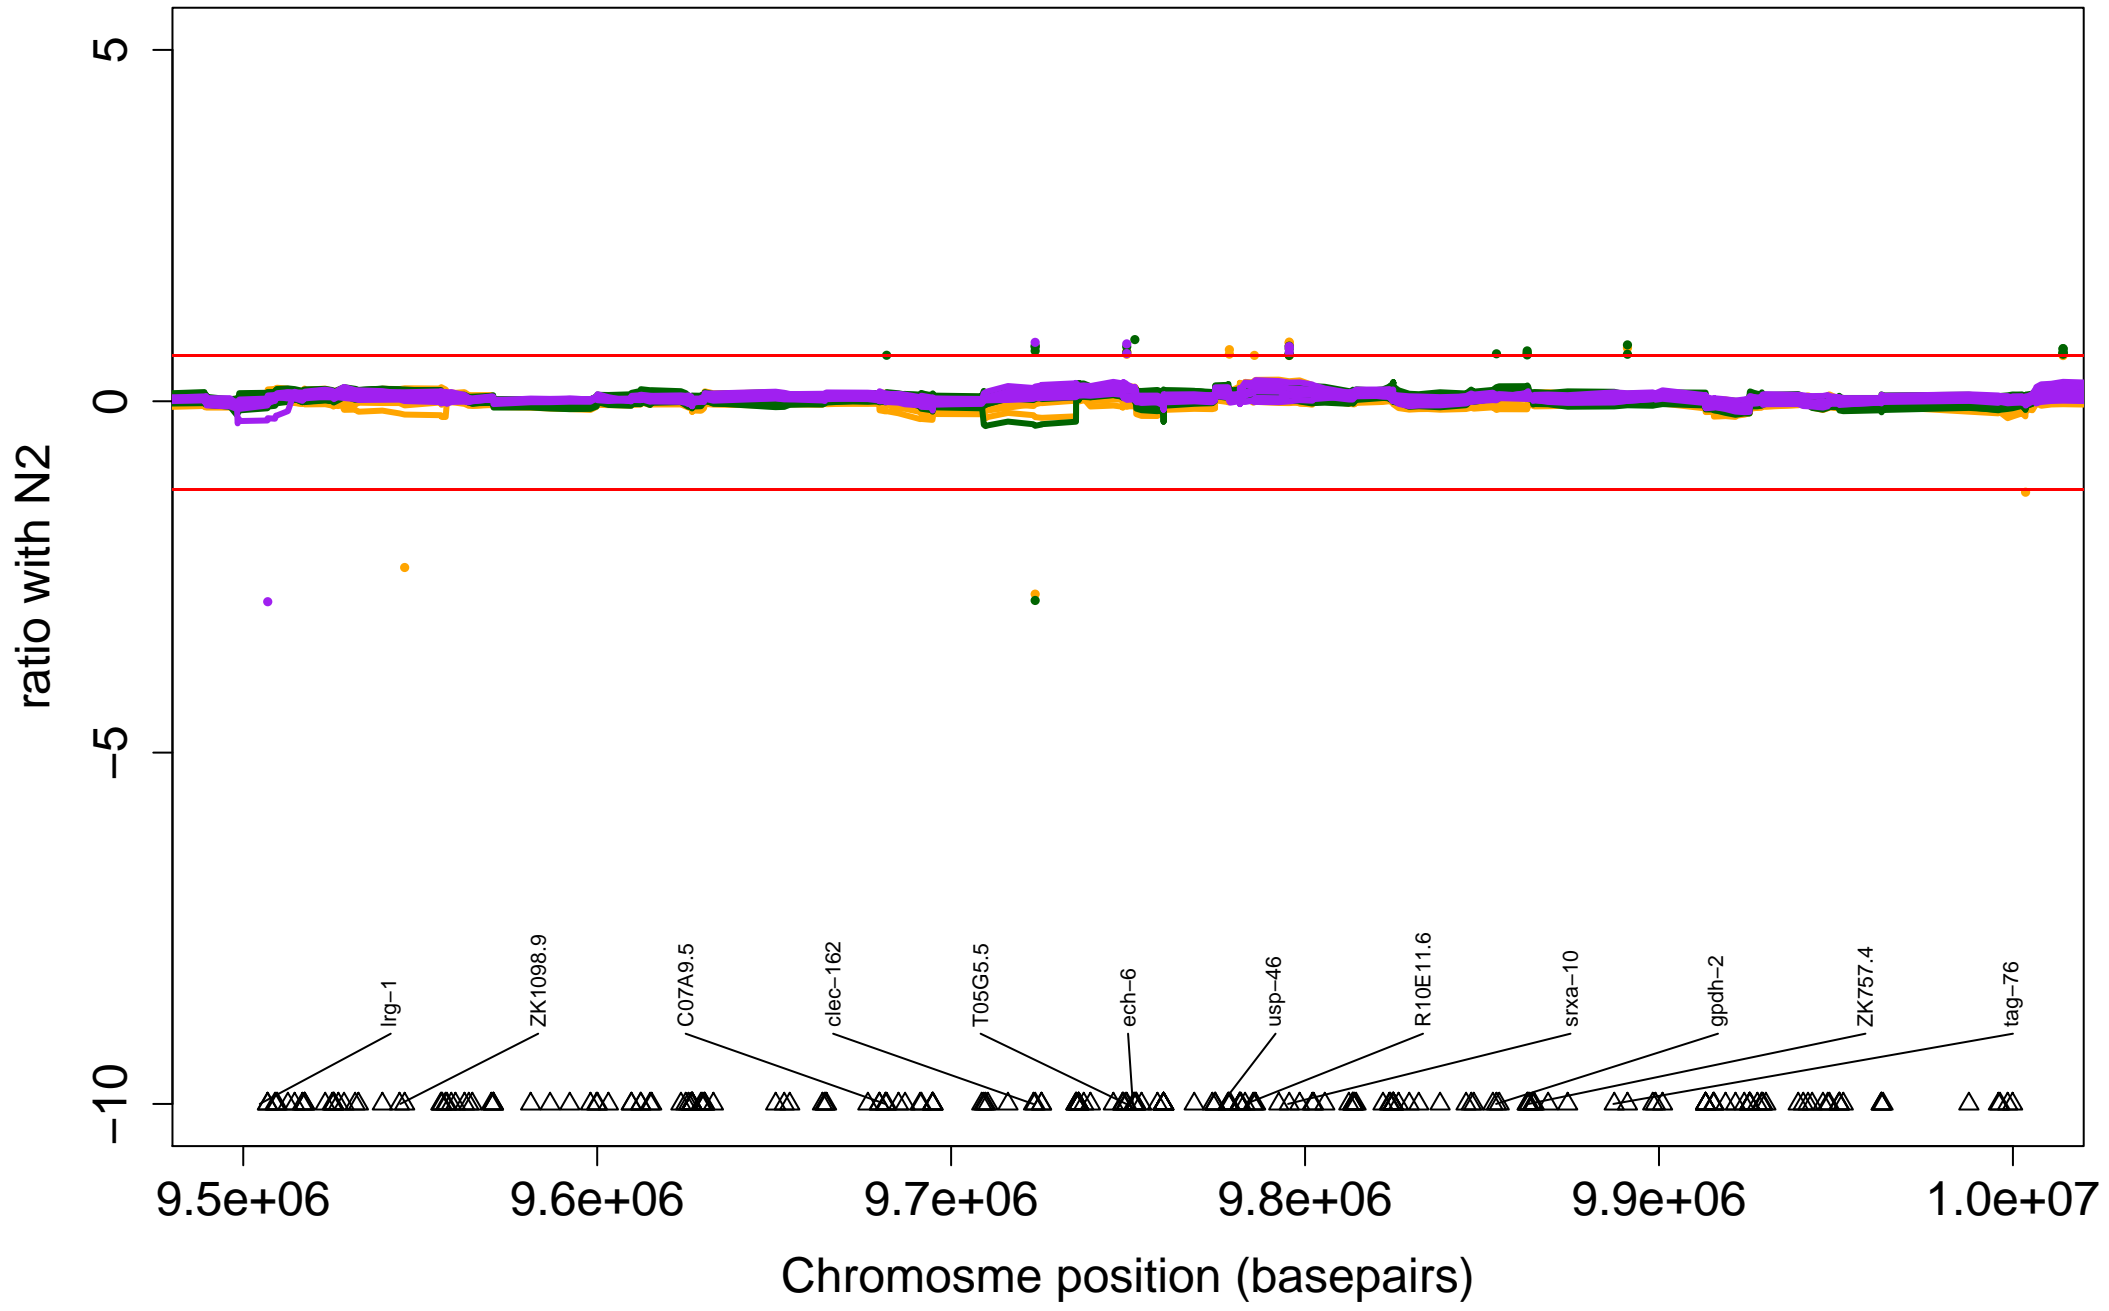

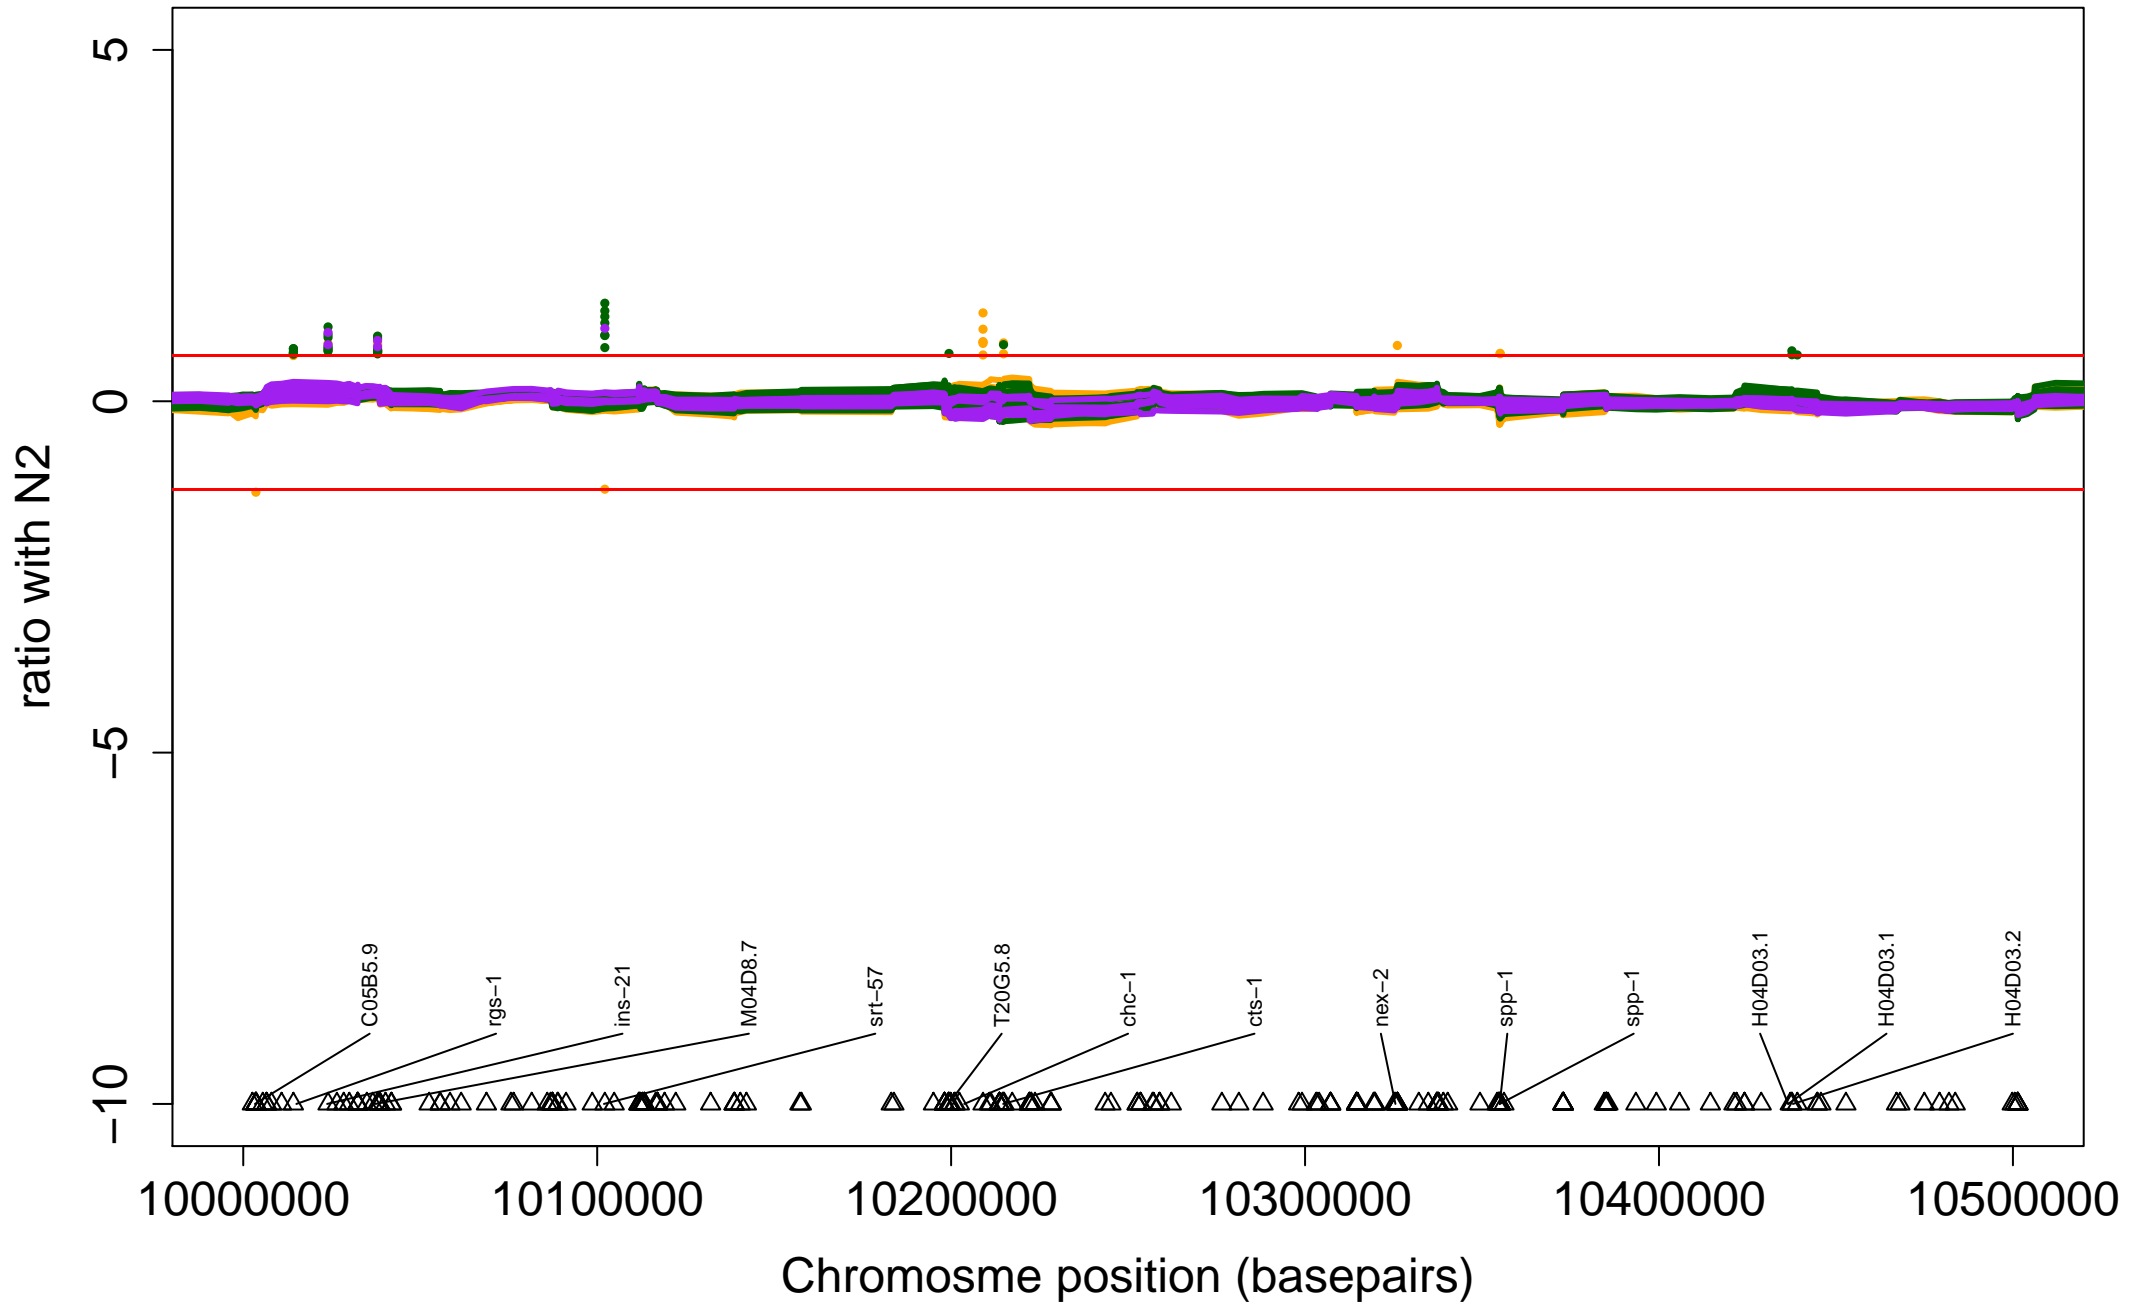

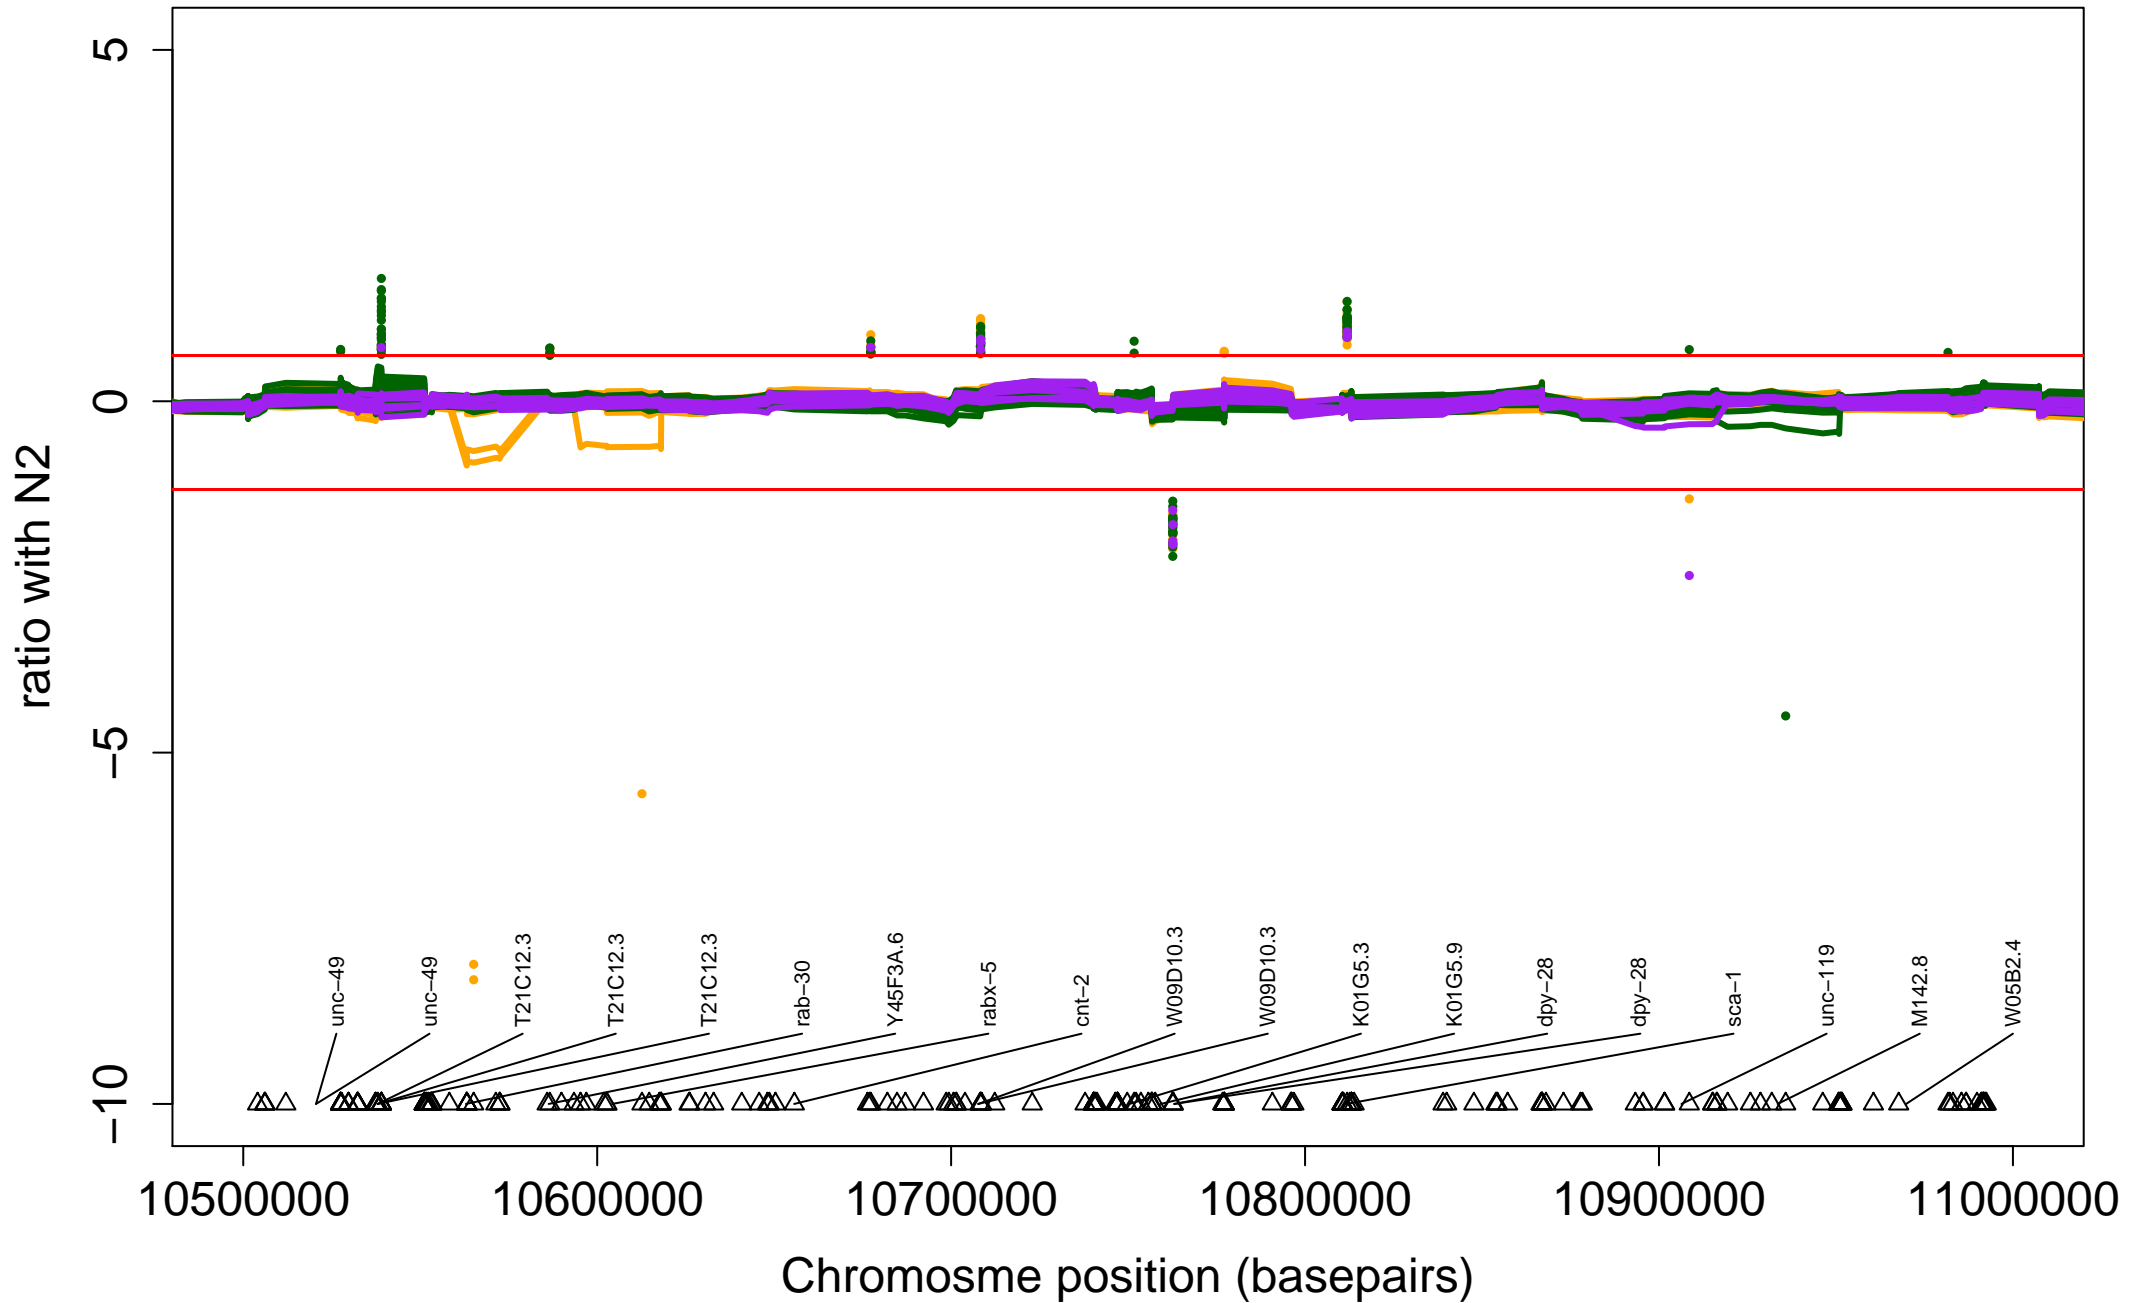

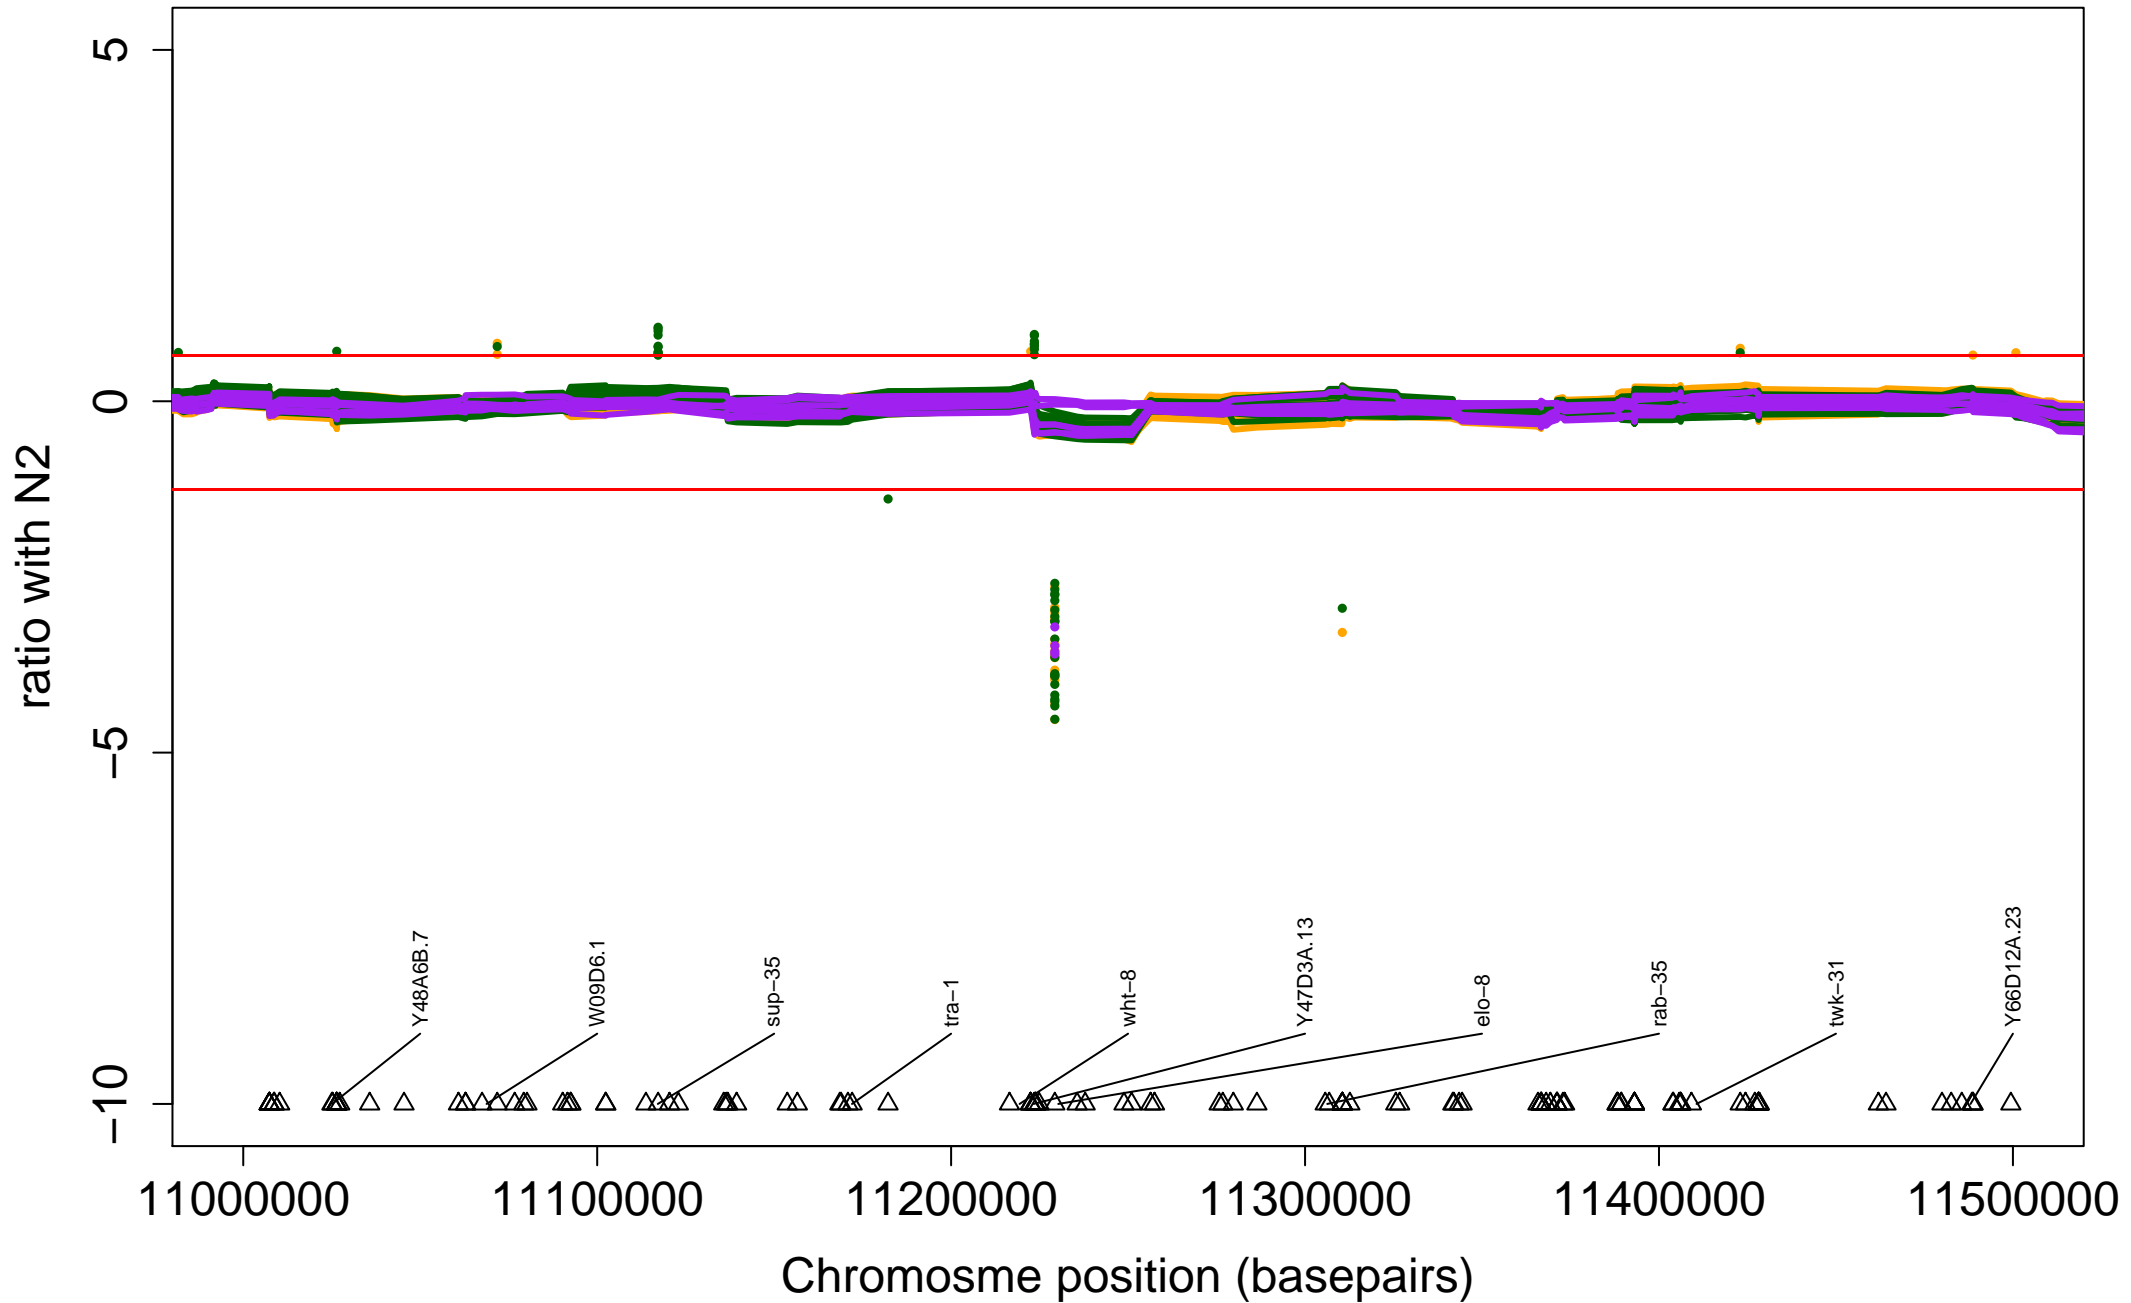

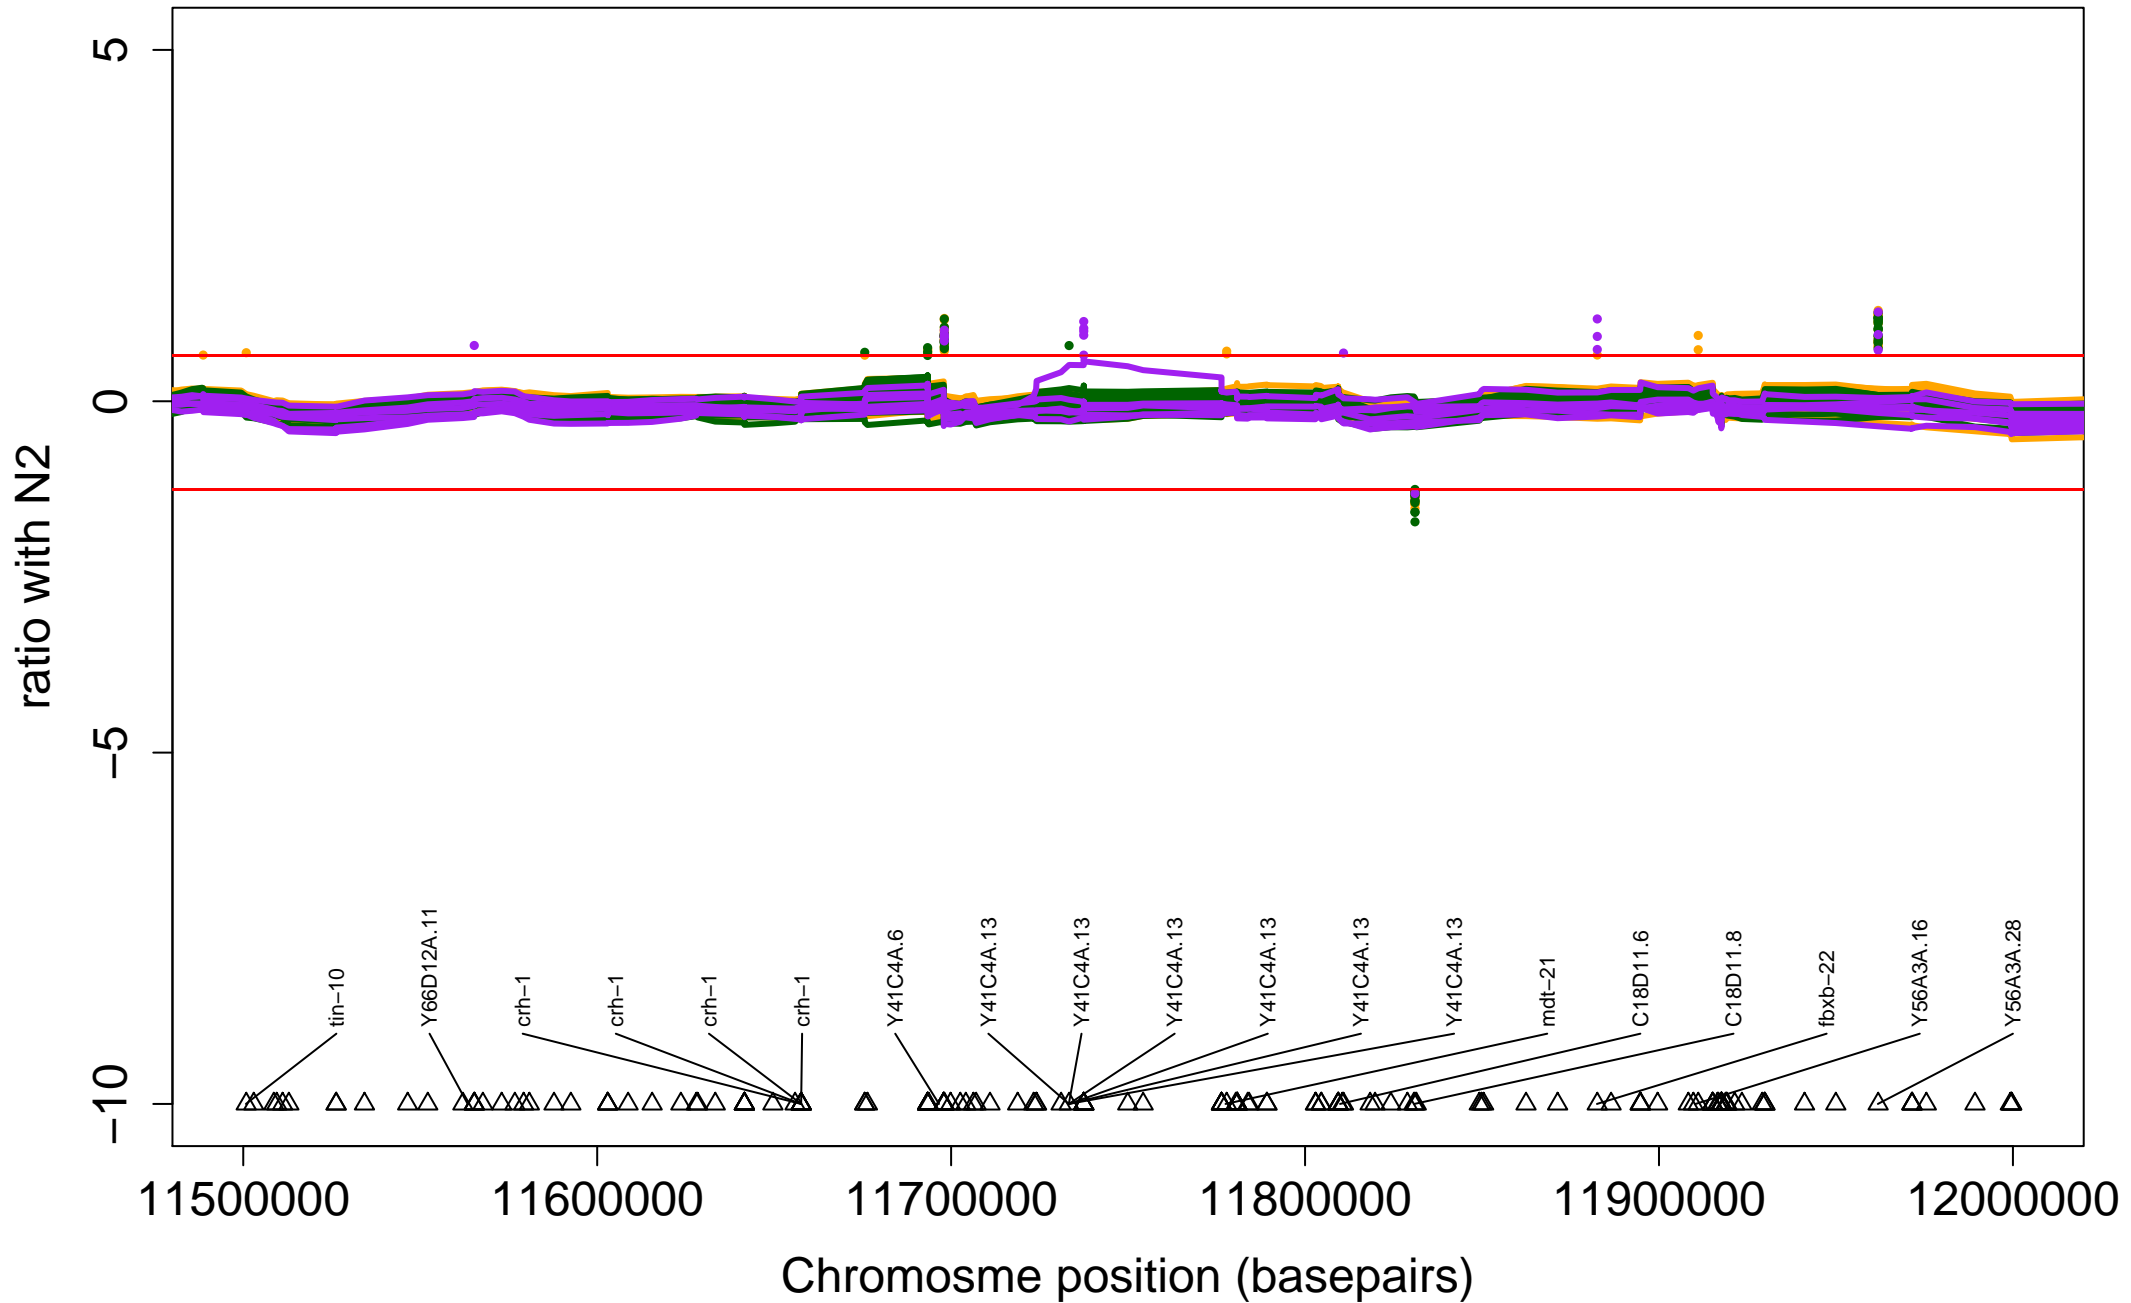

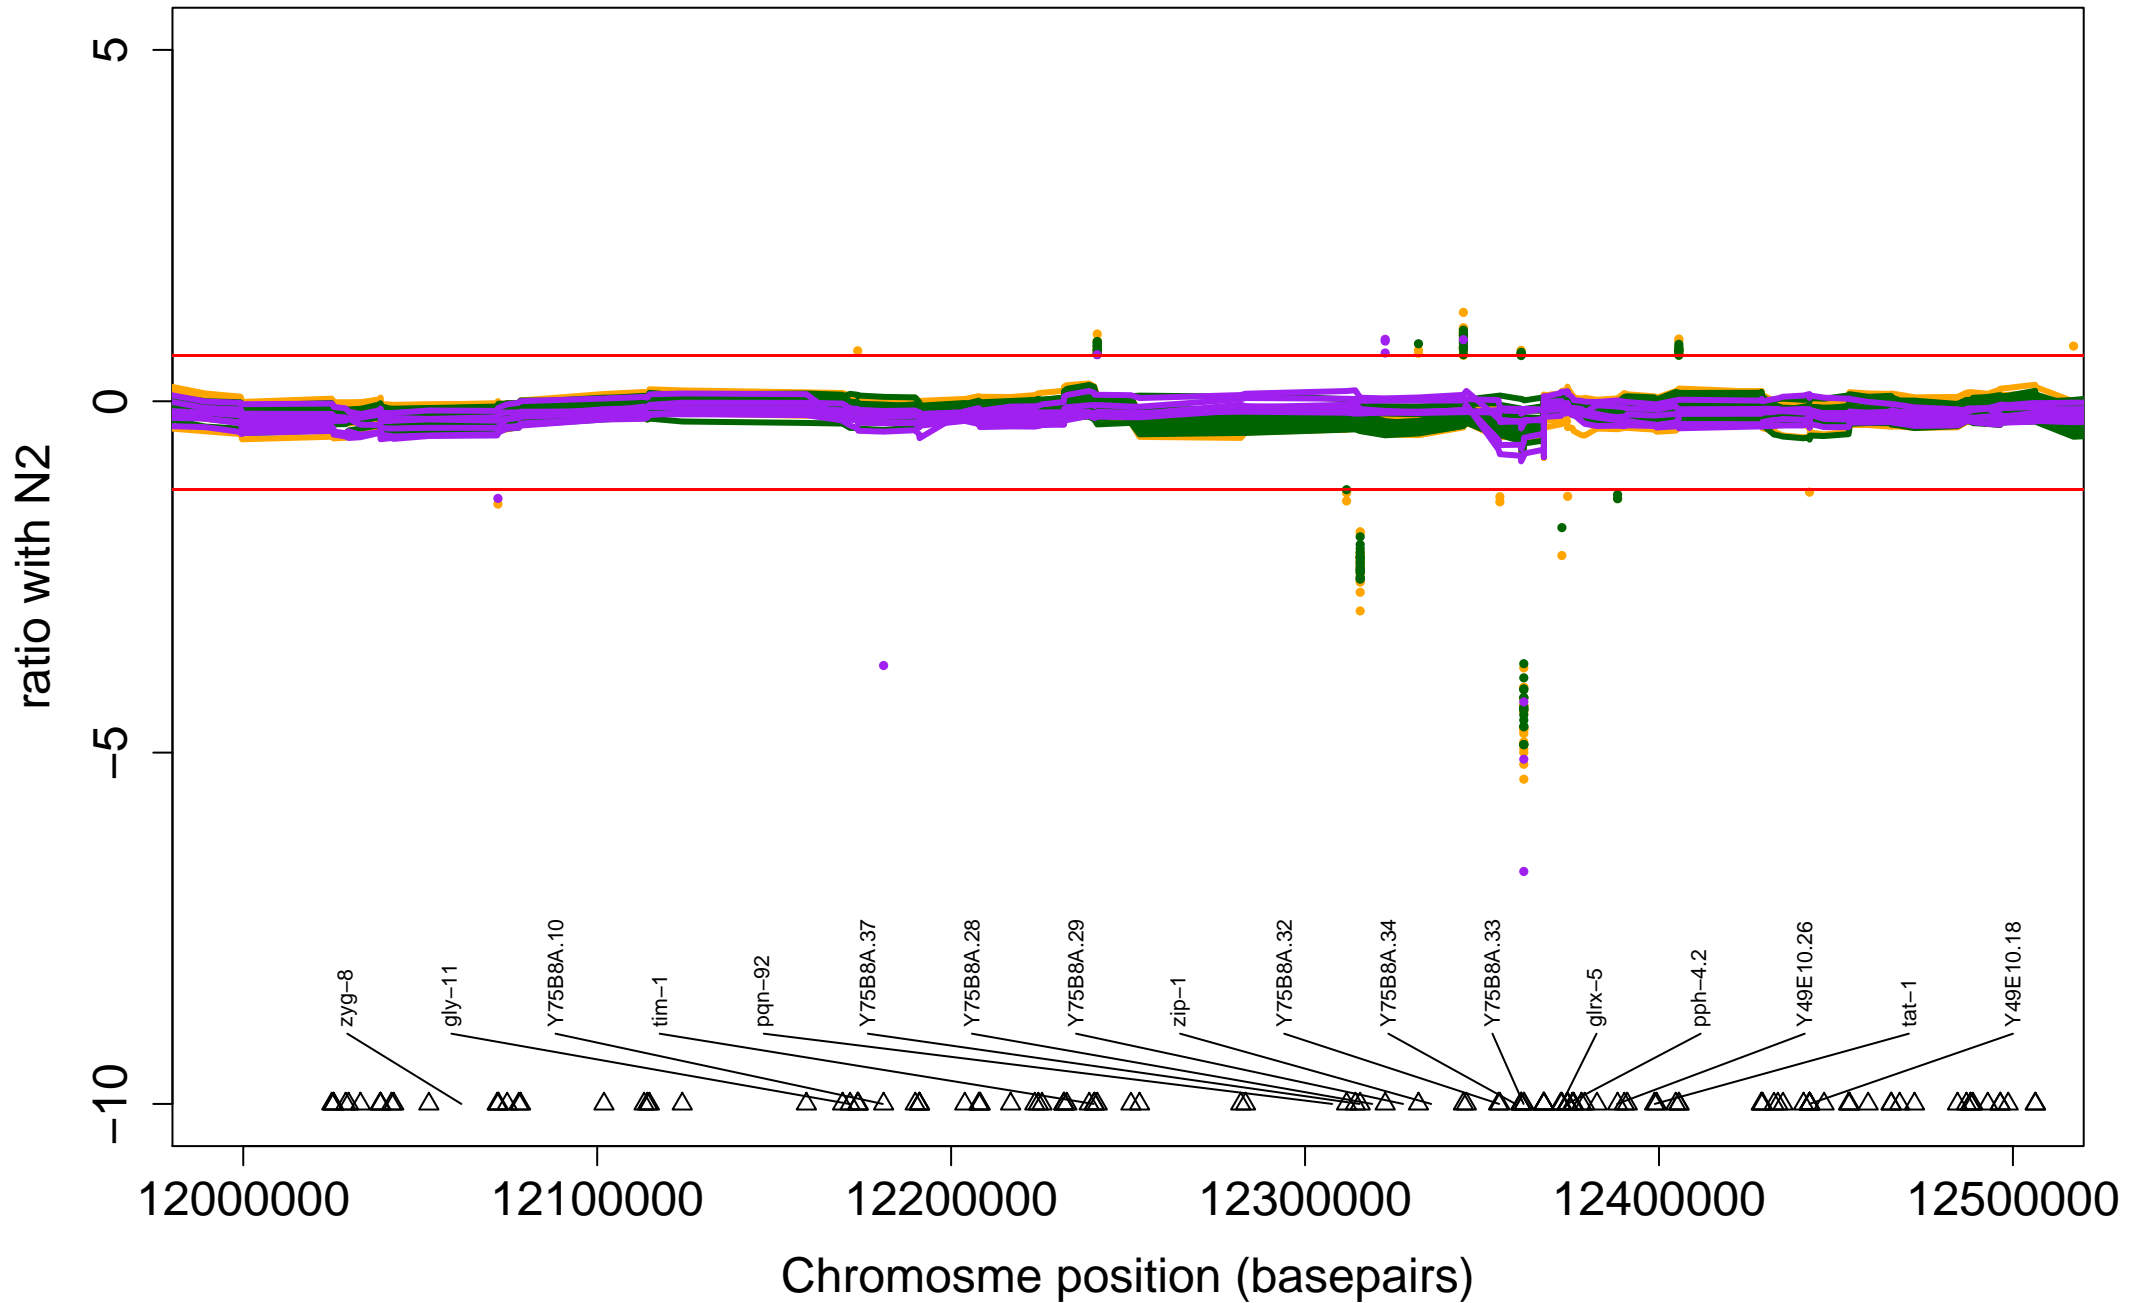





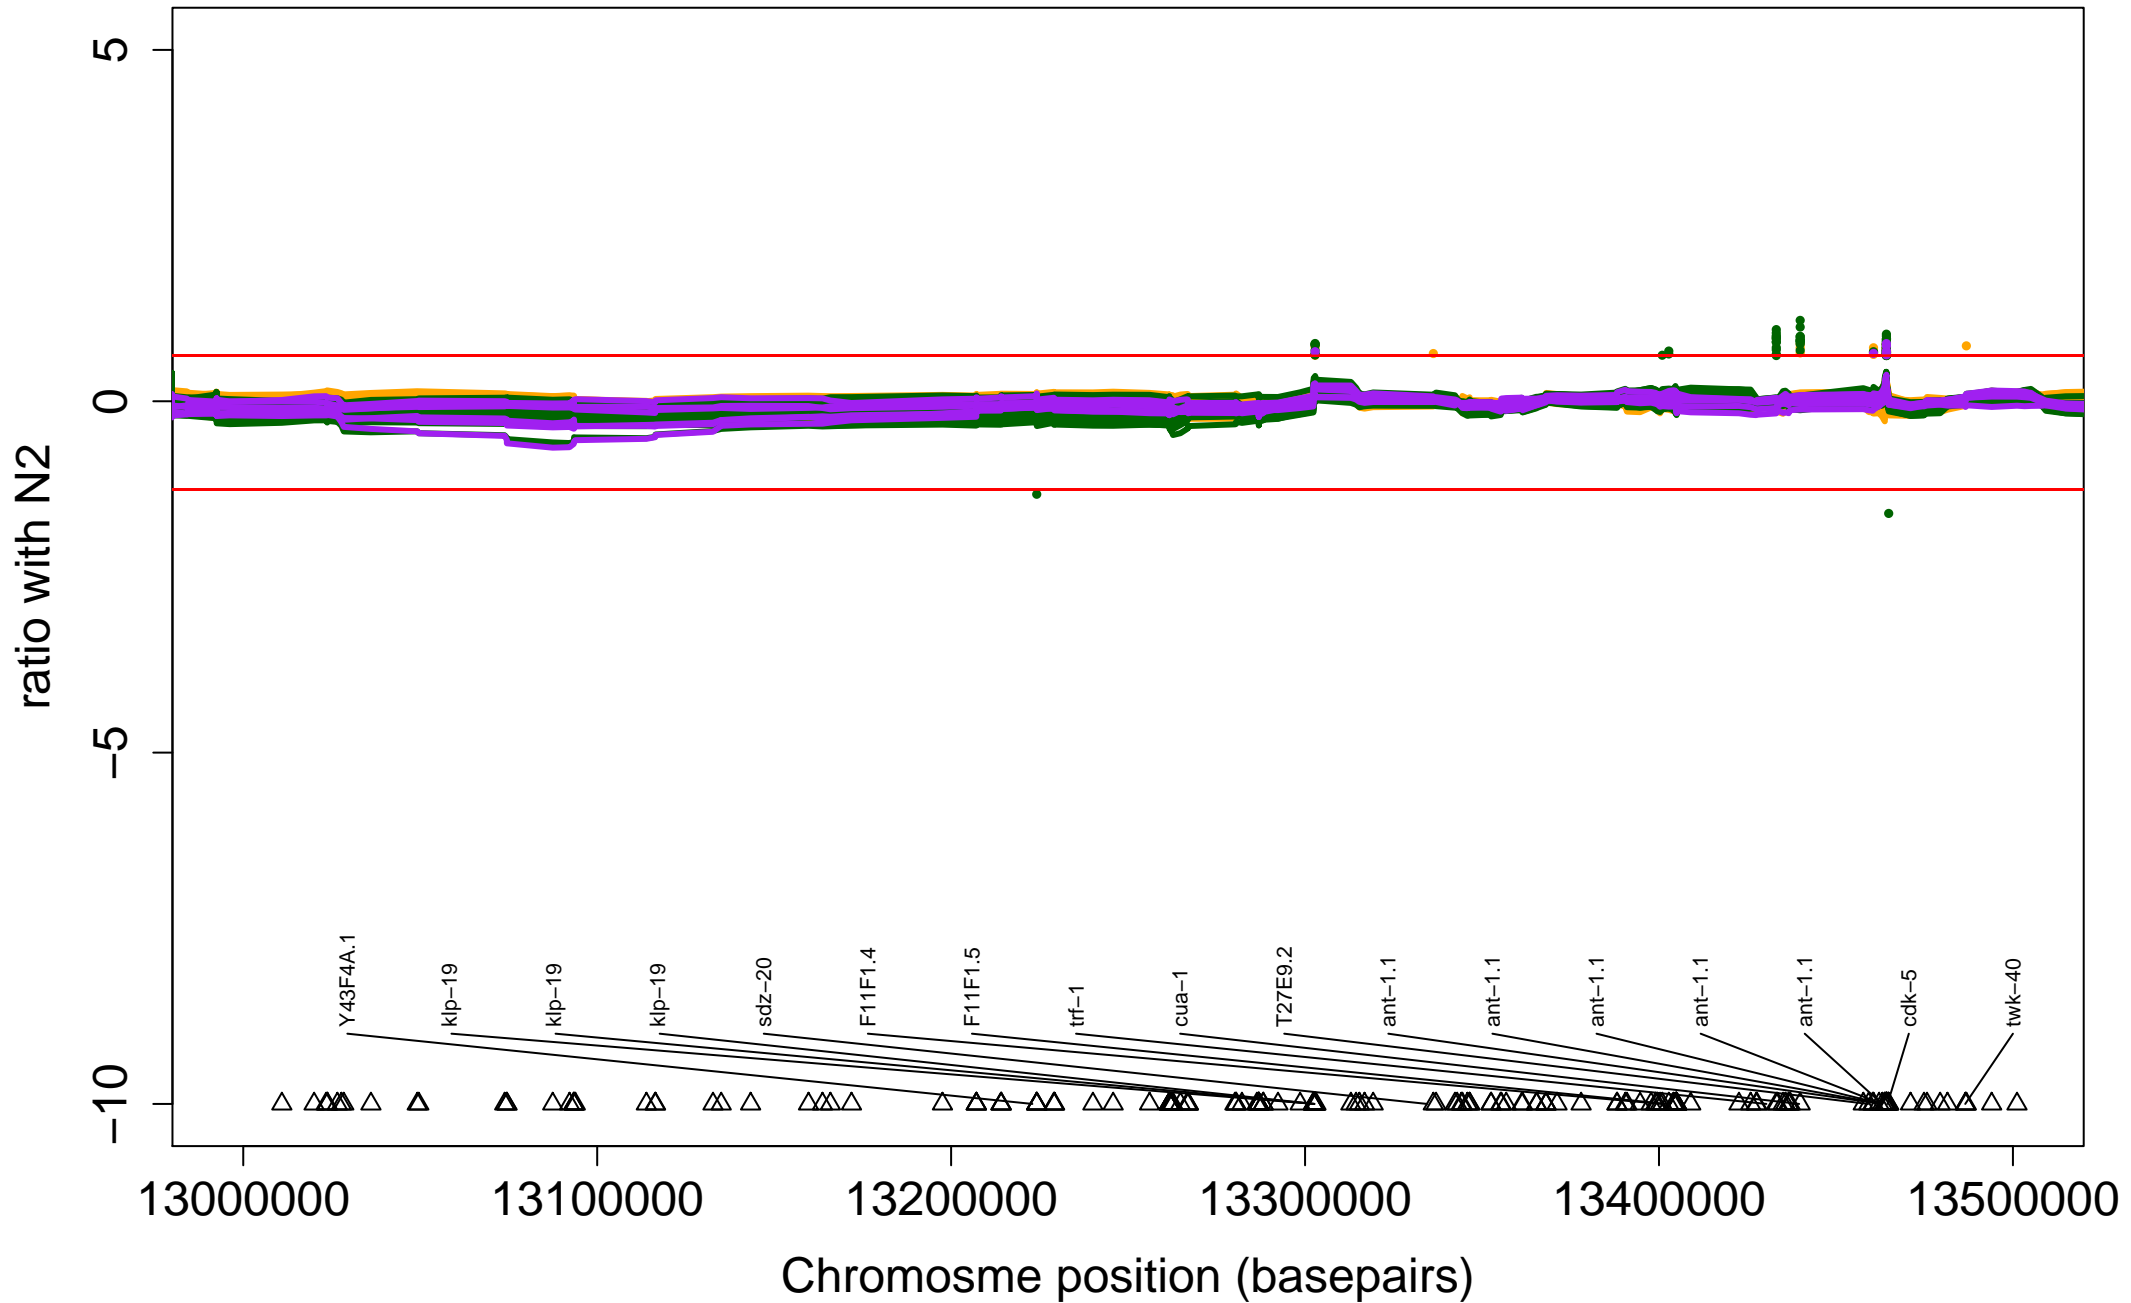

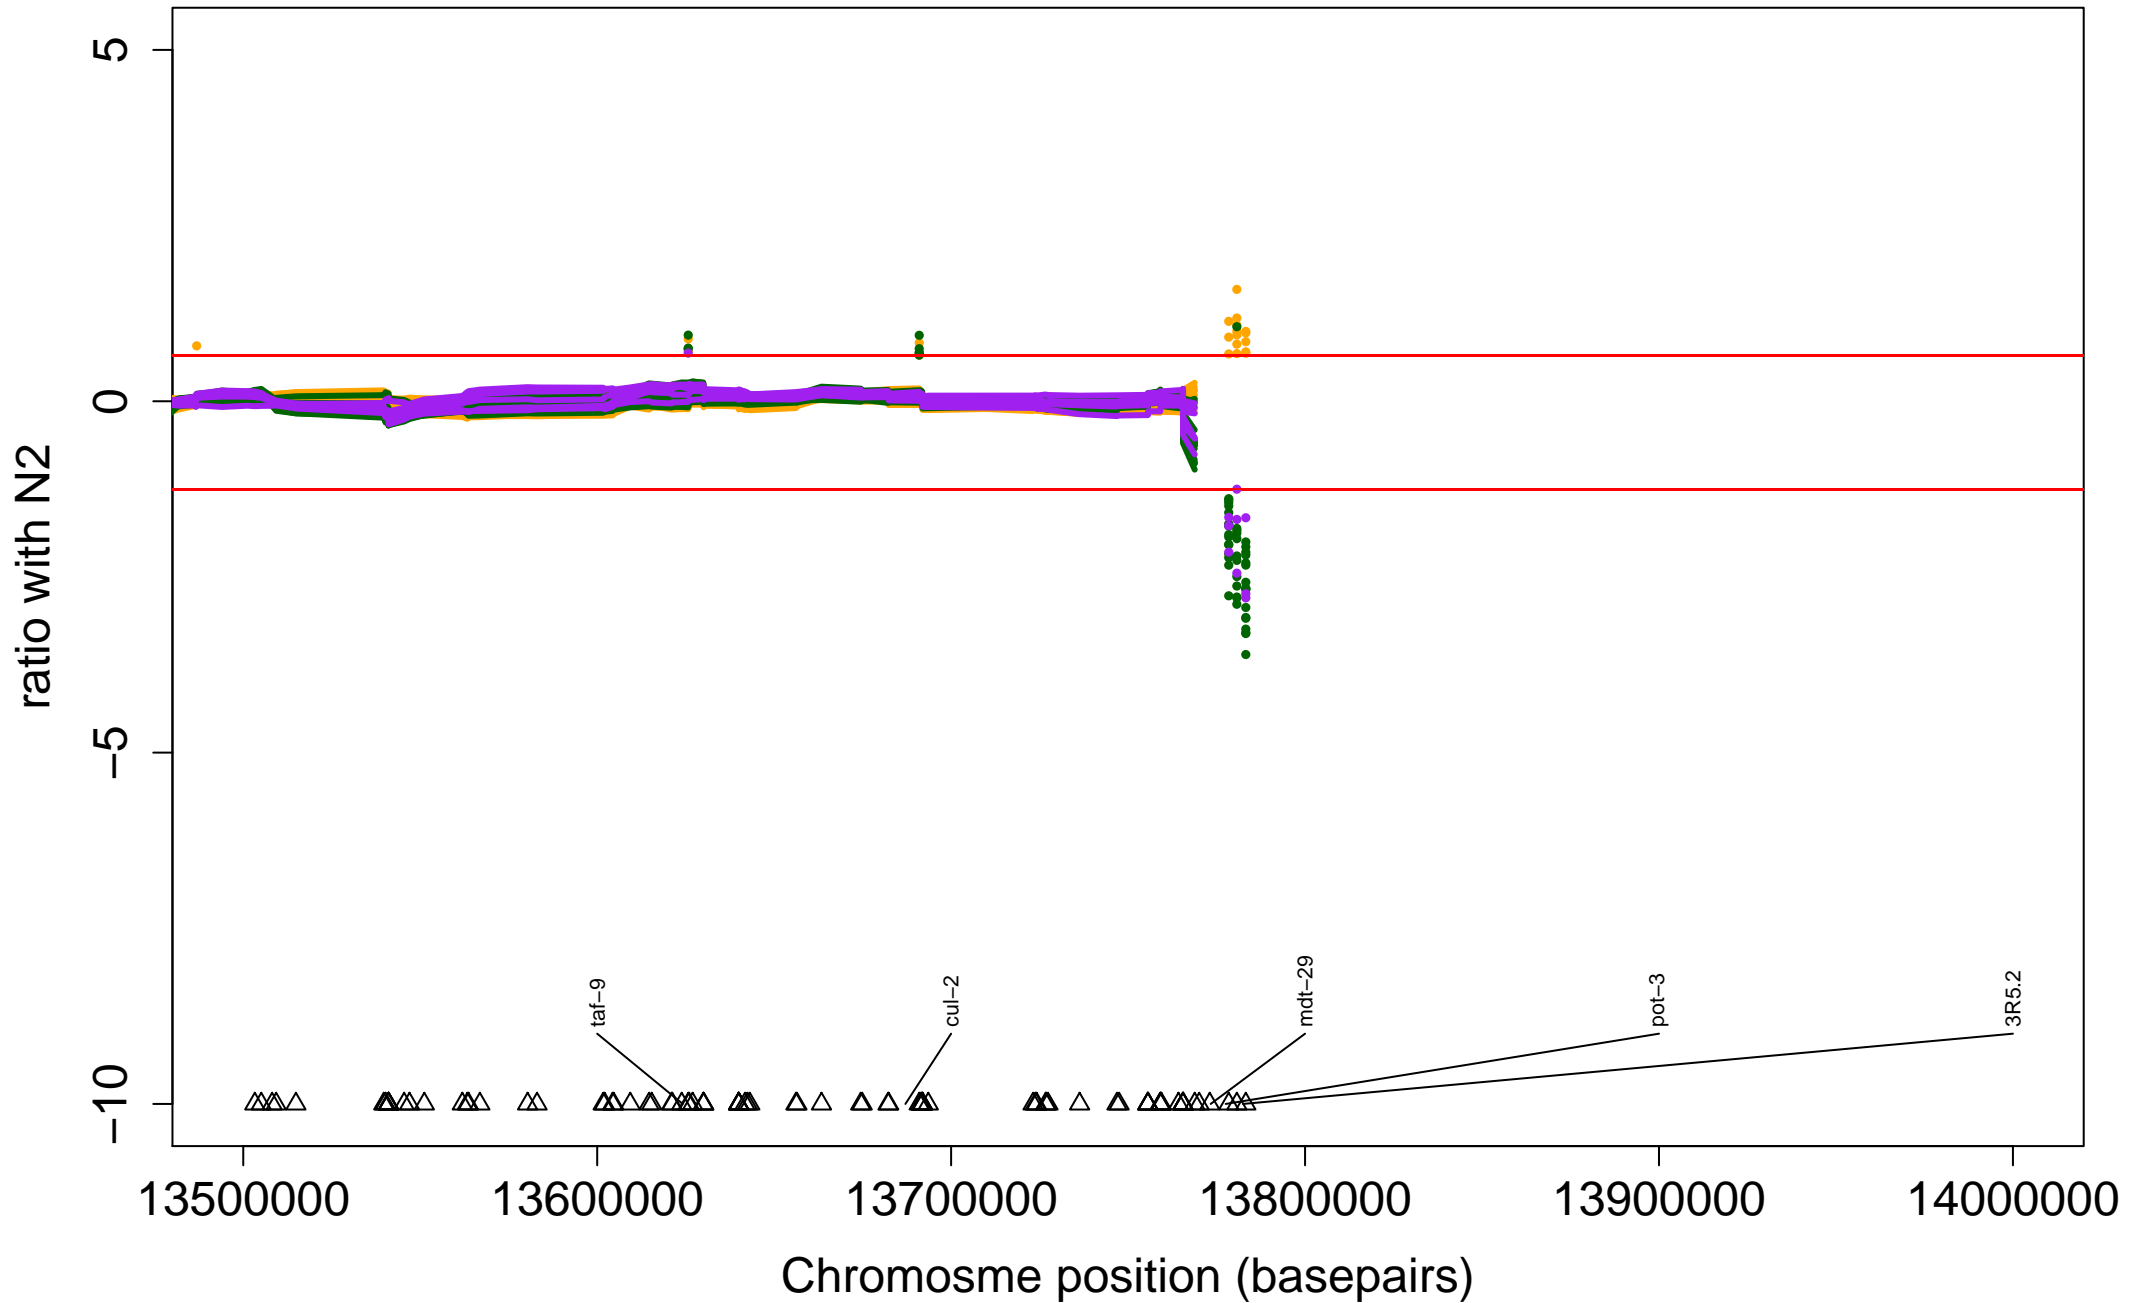

III

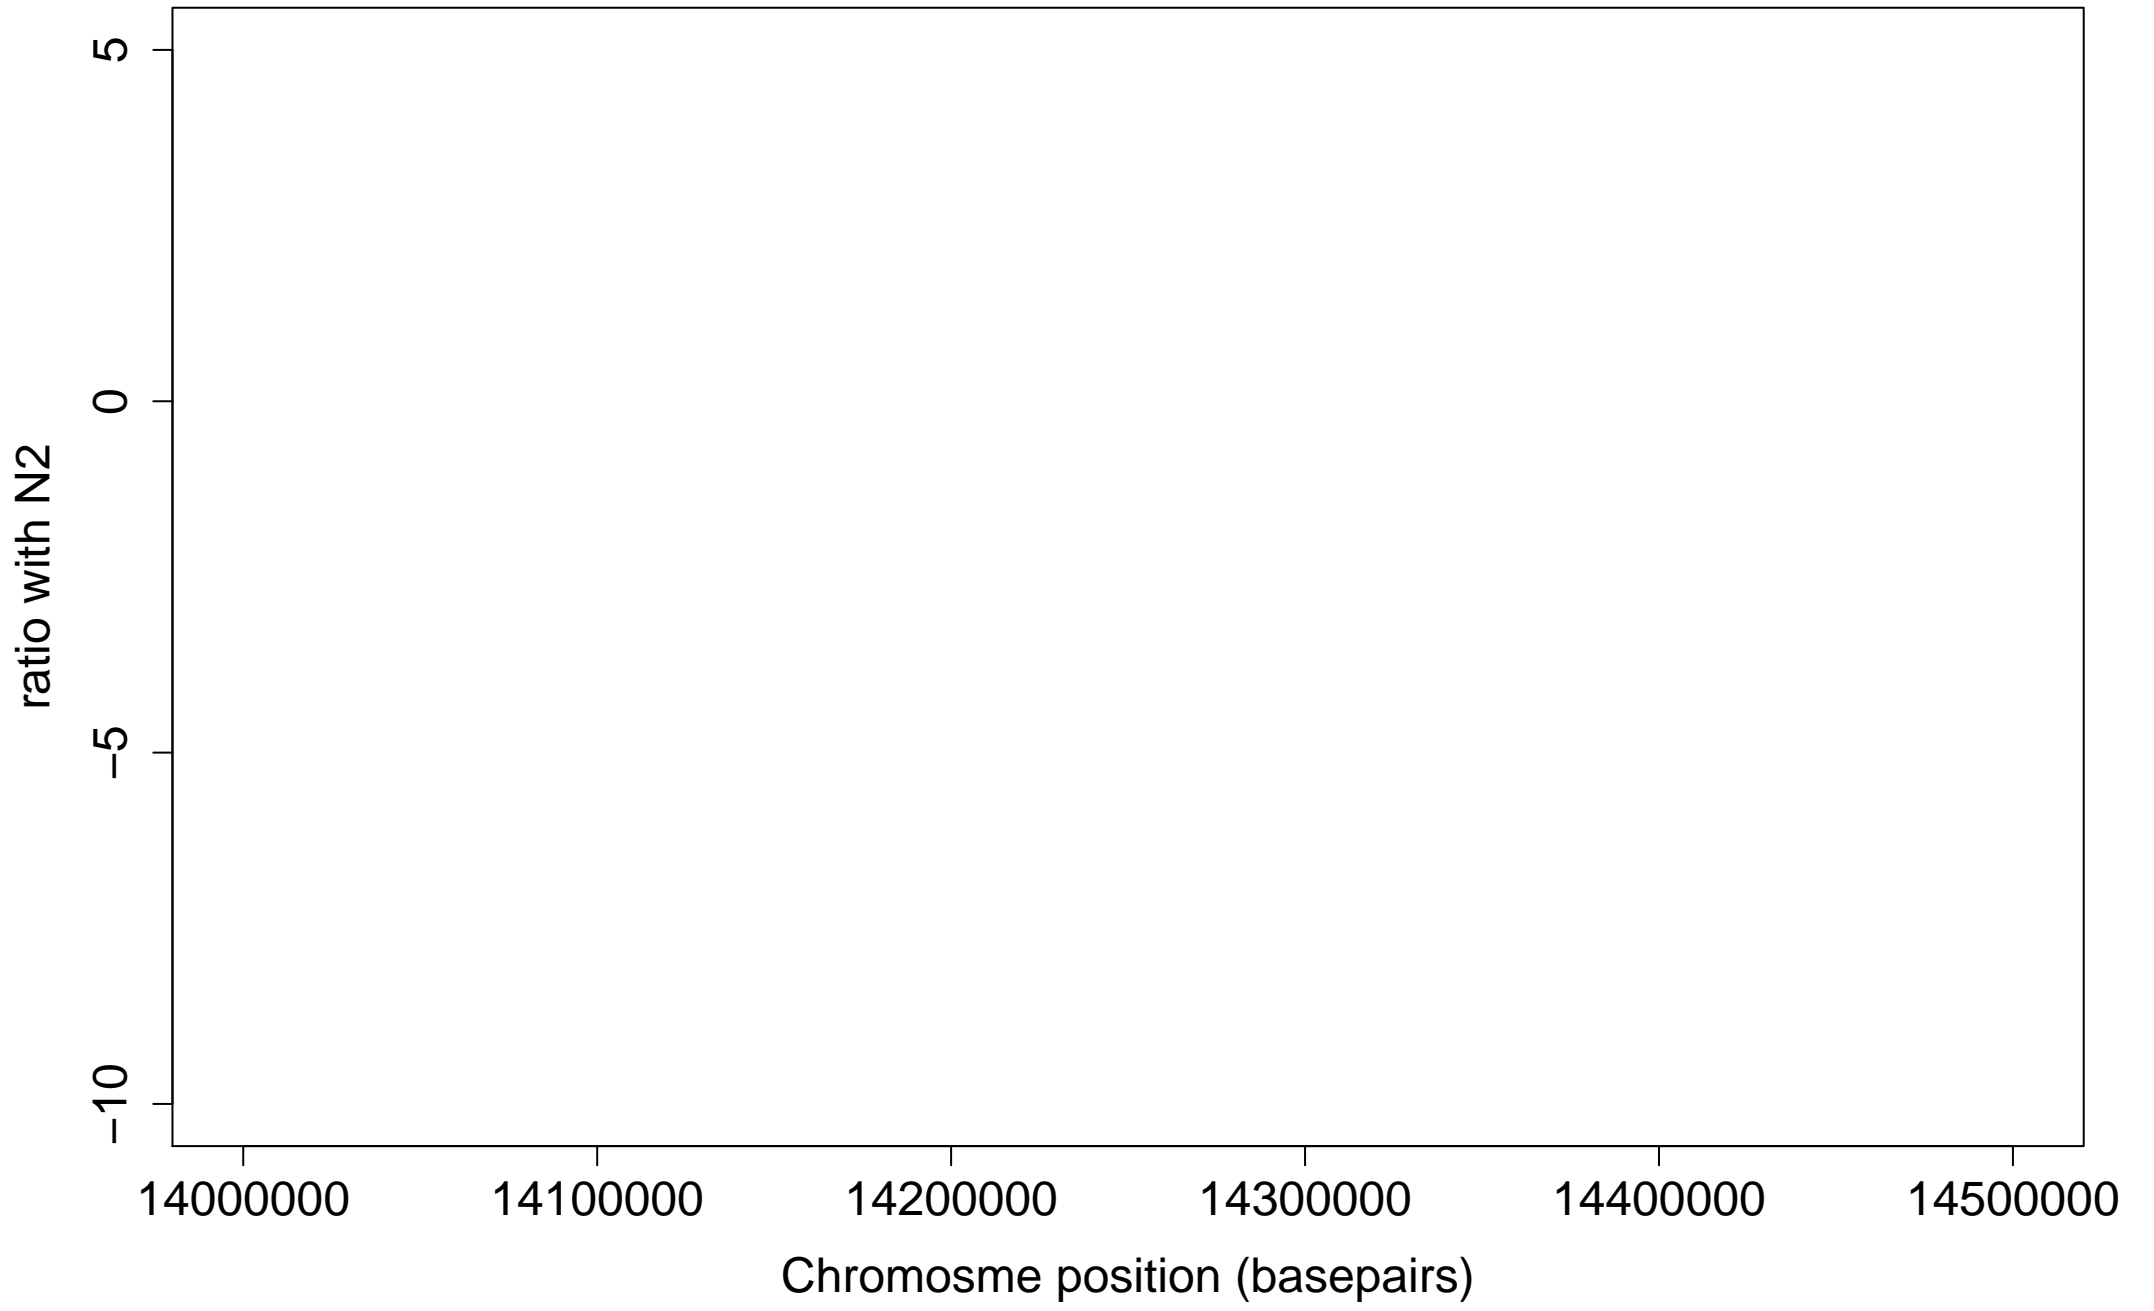

IV

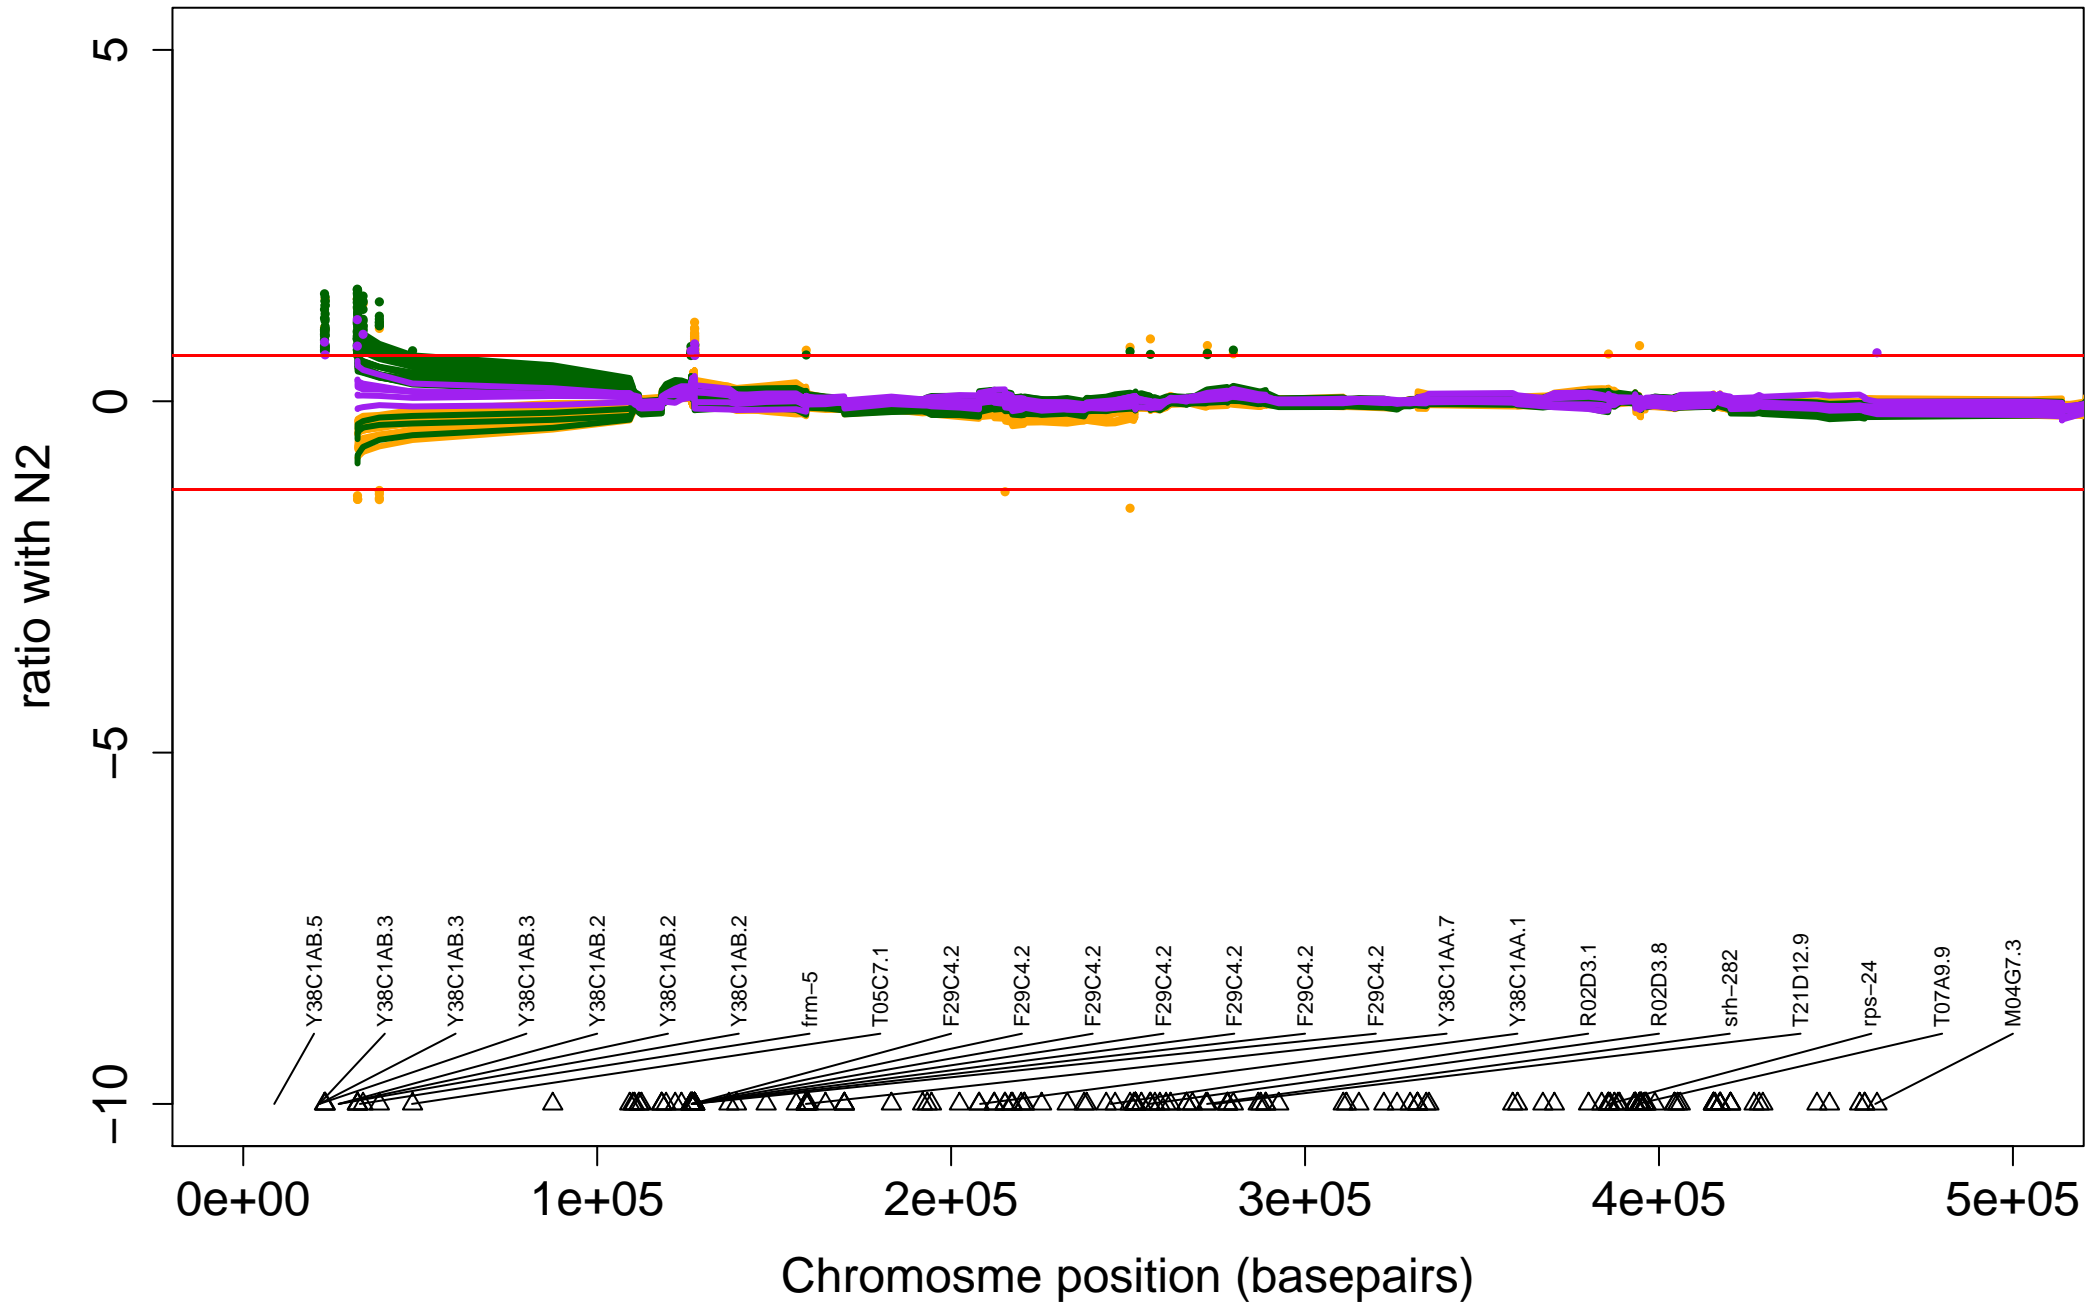

## IV

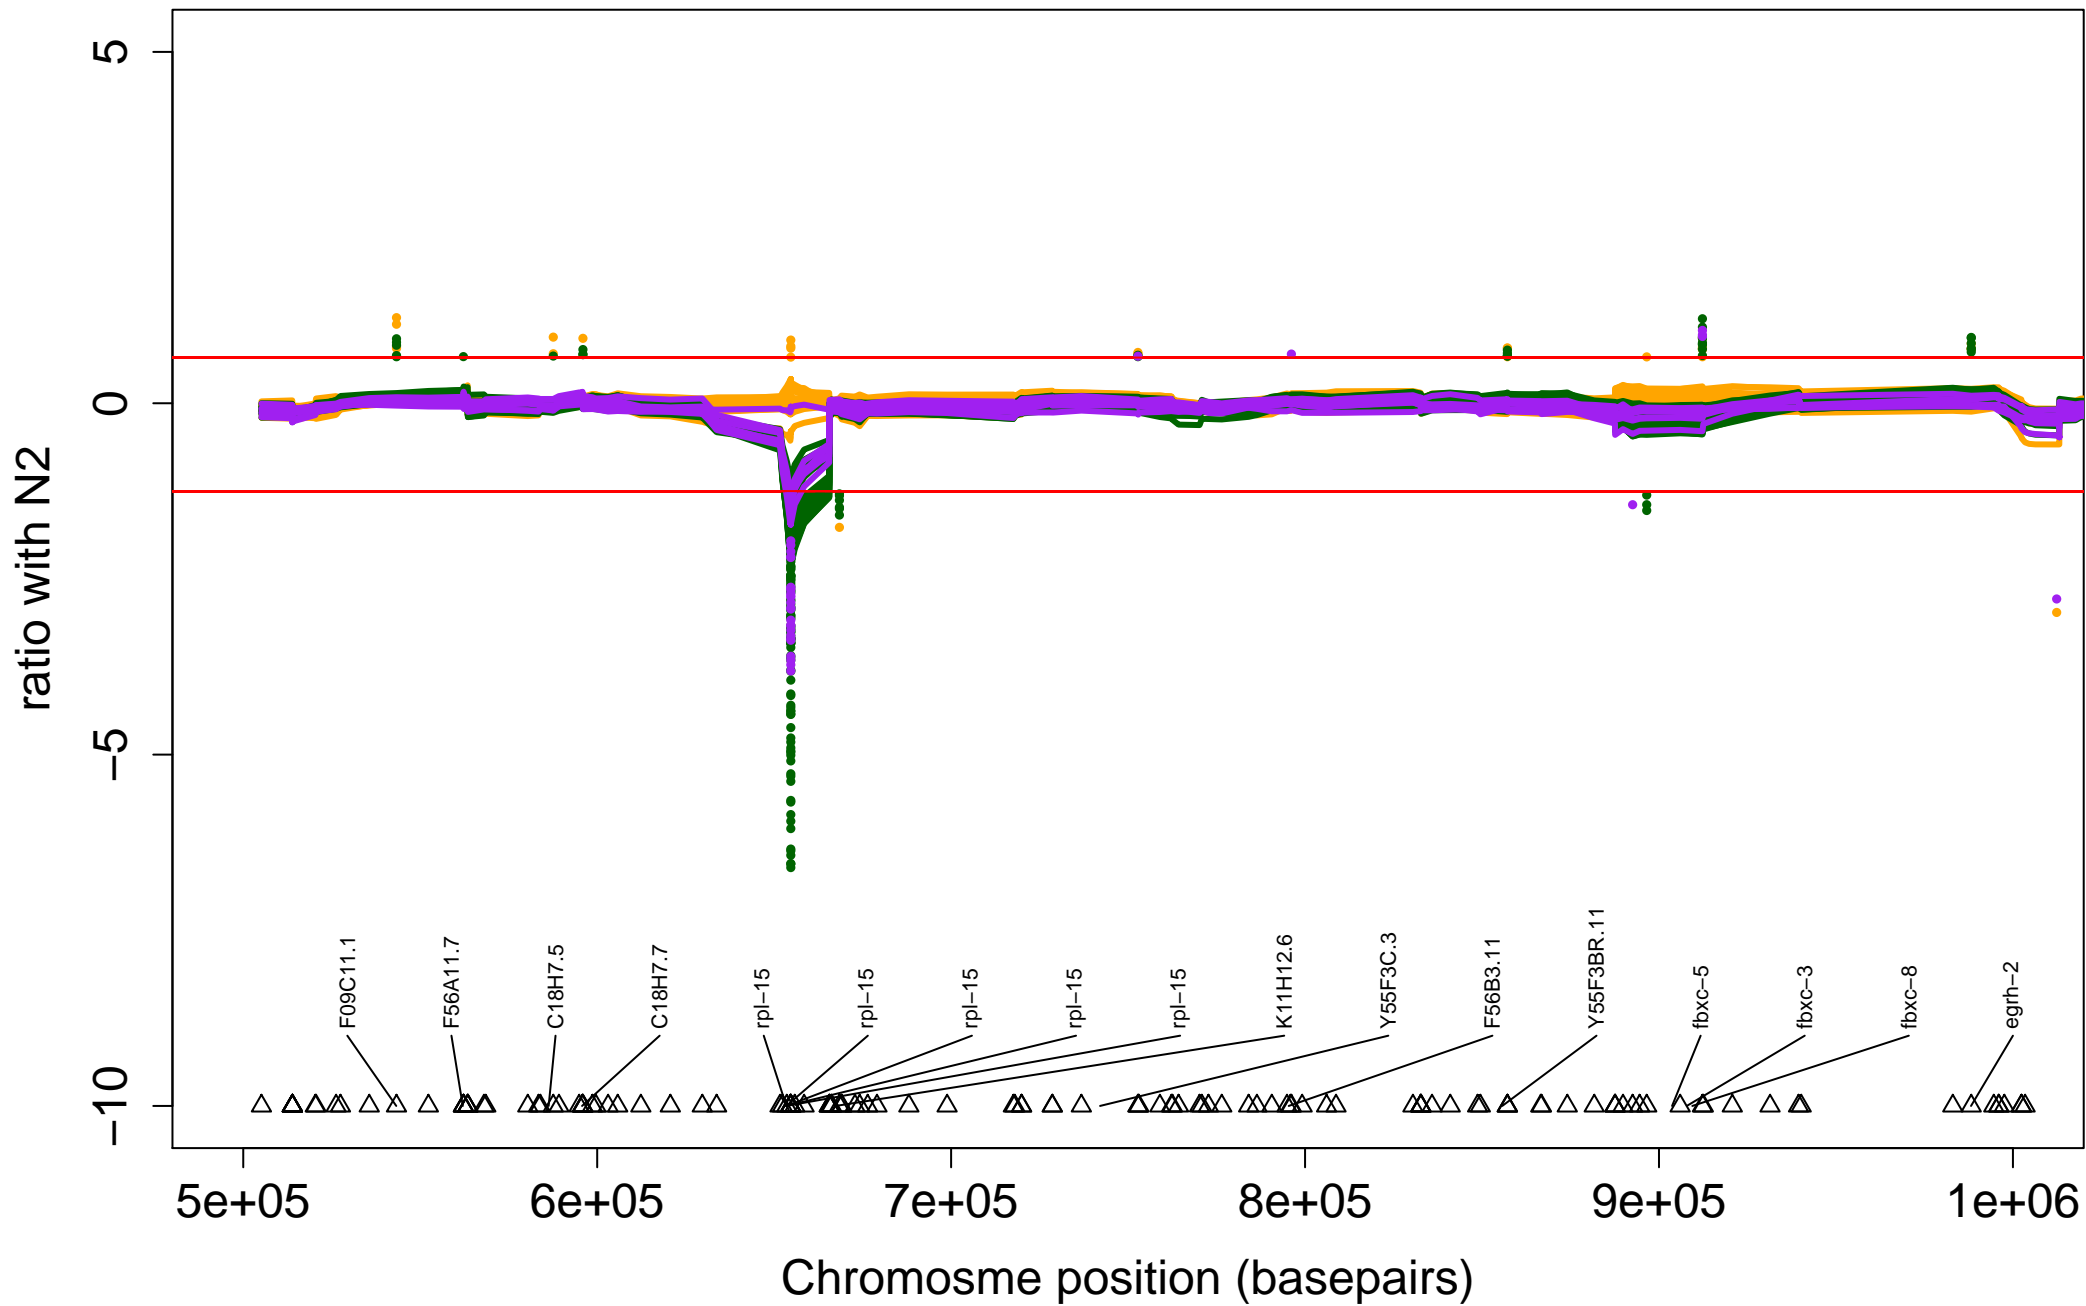

IV

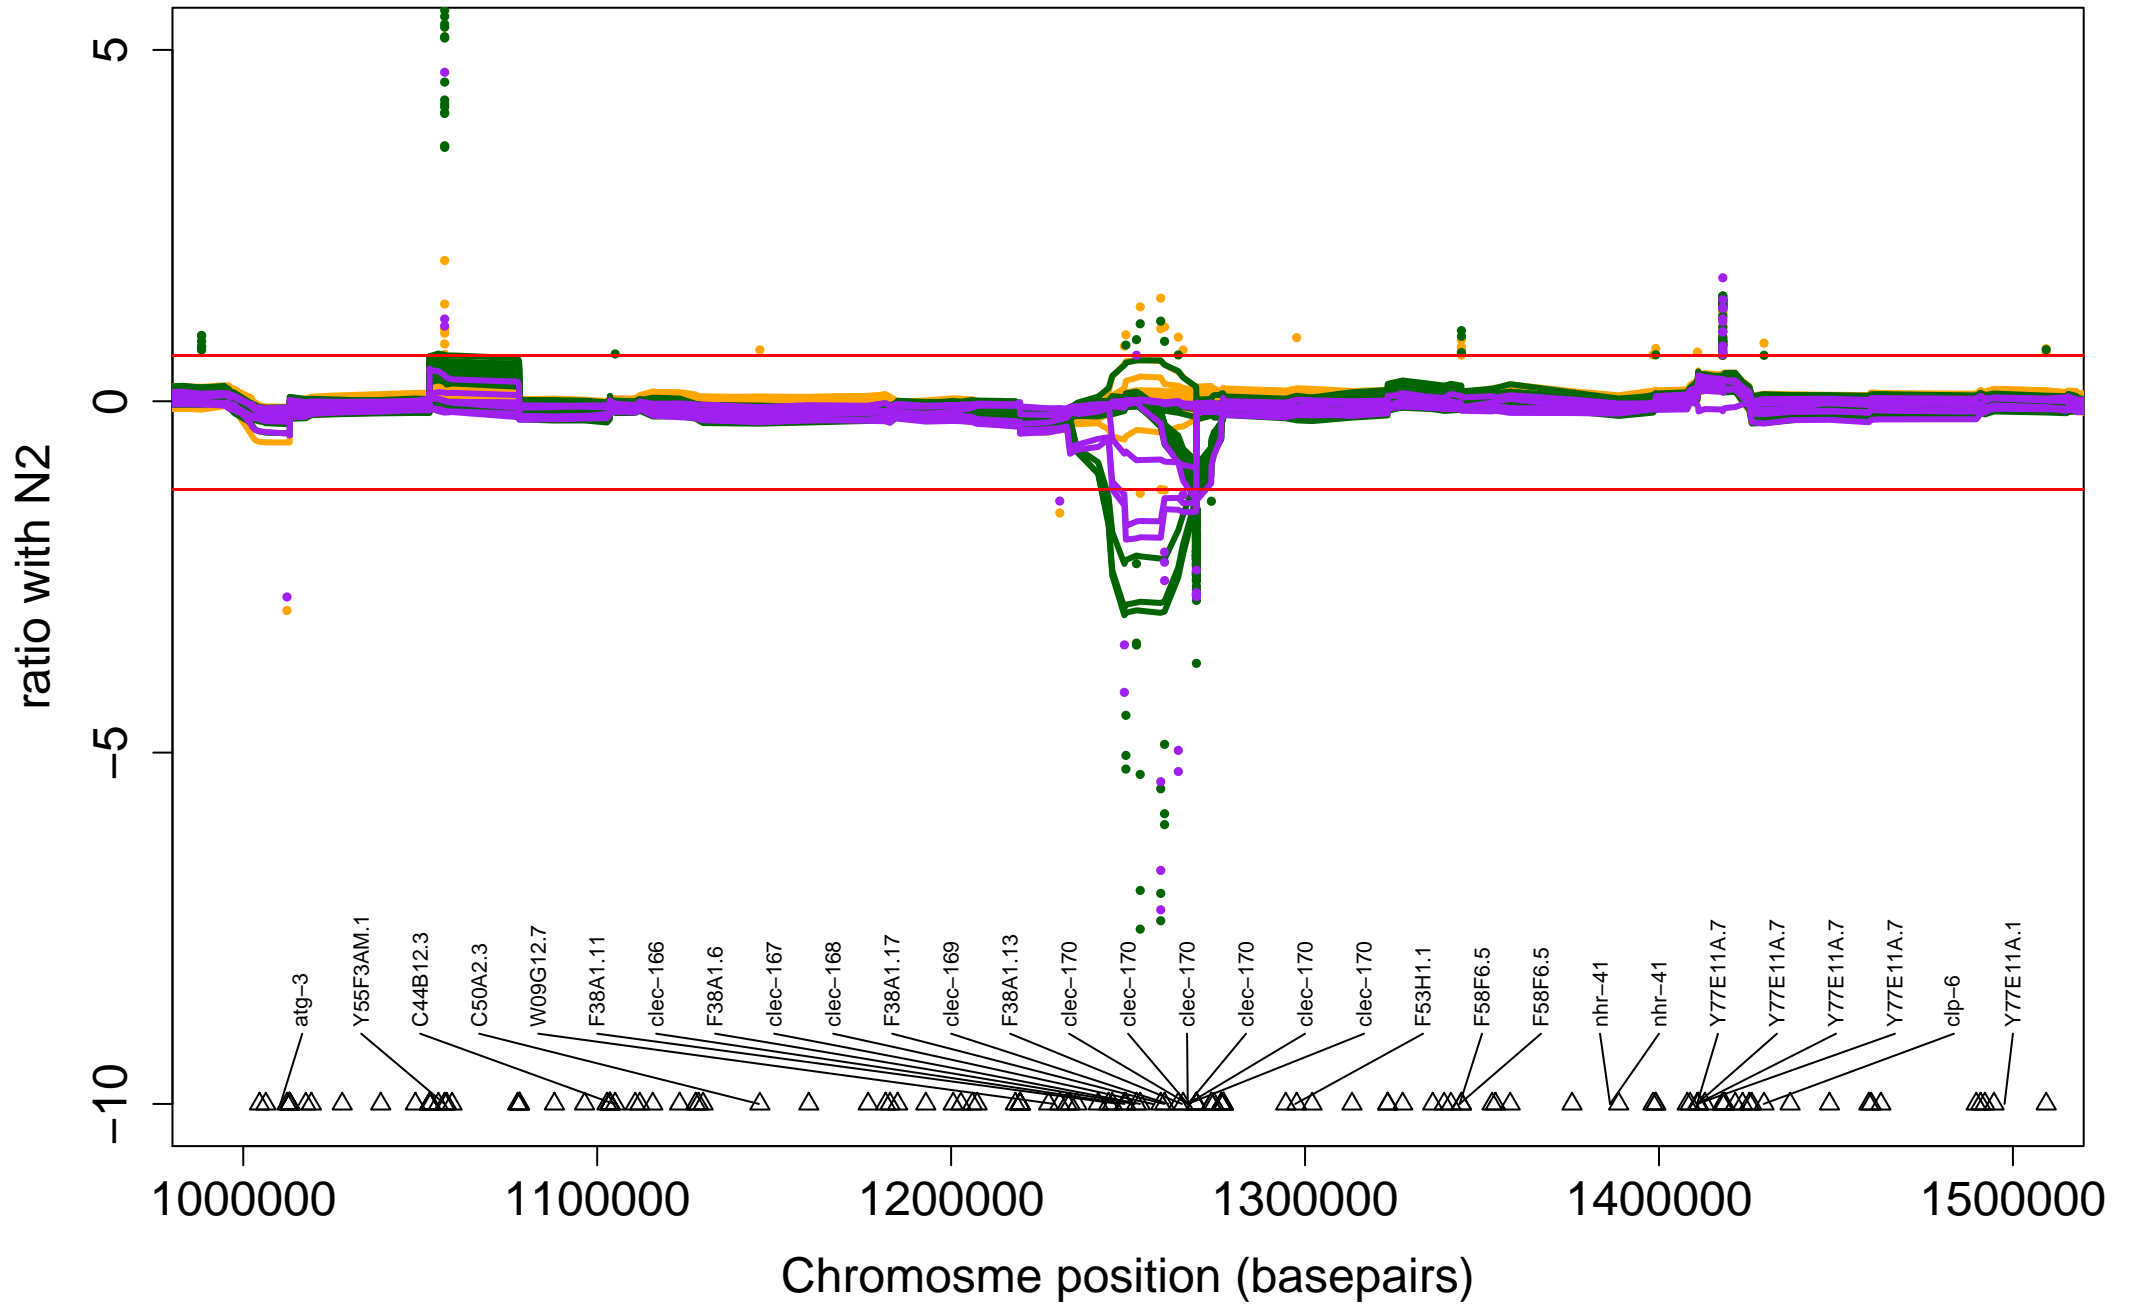

IV

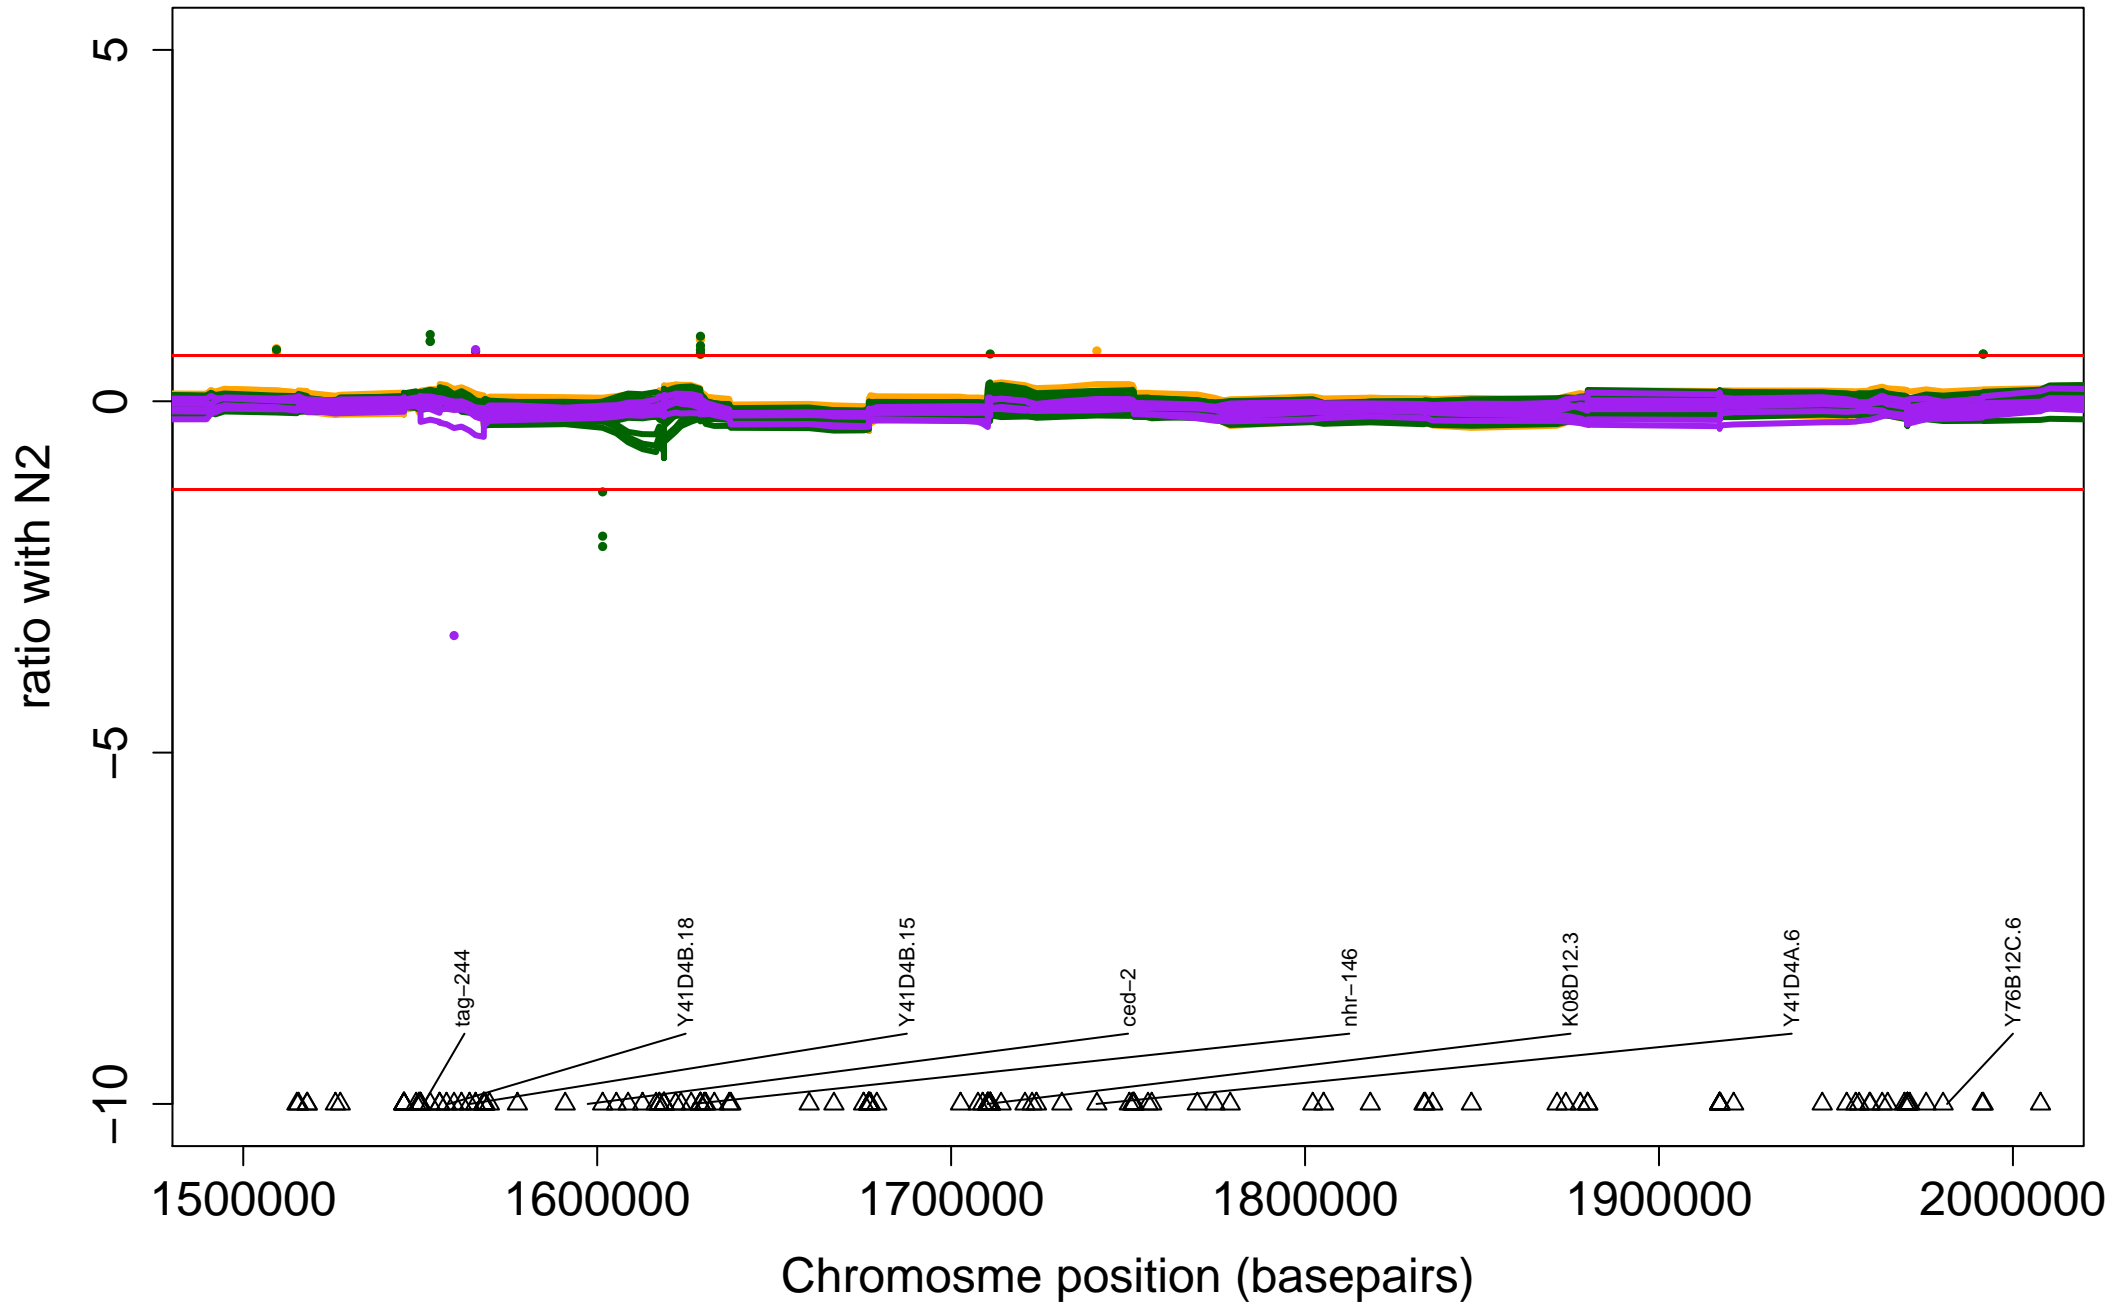



IV

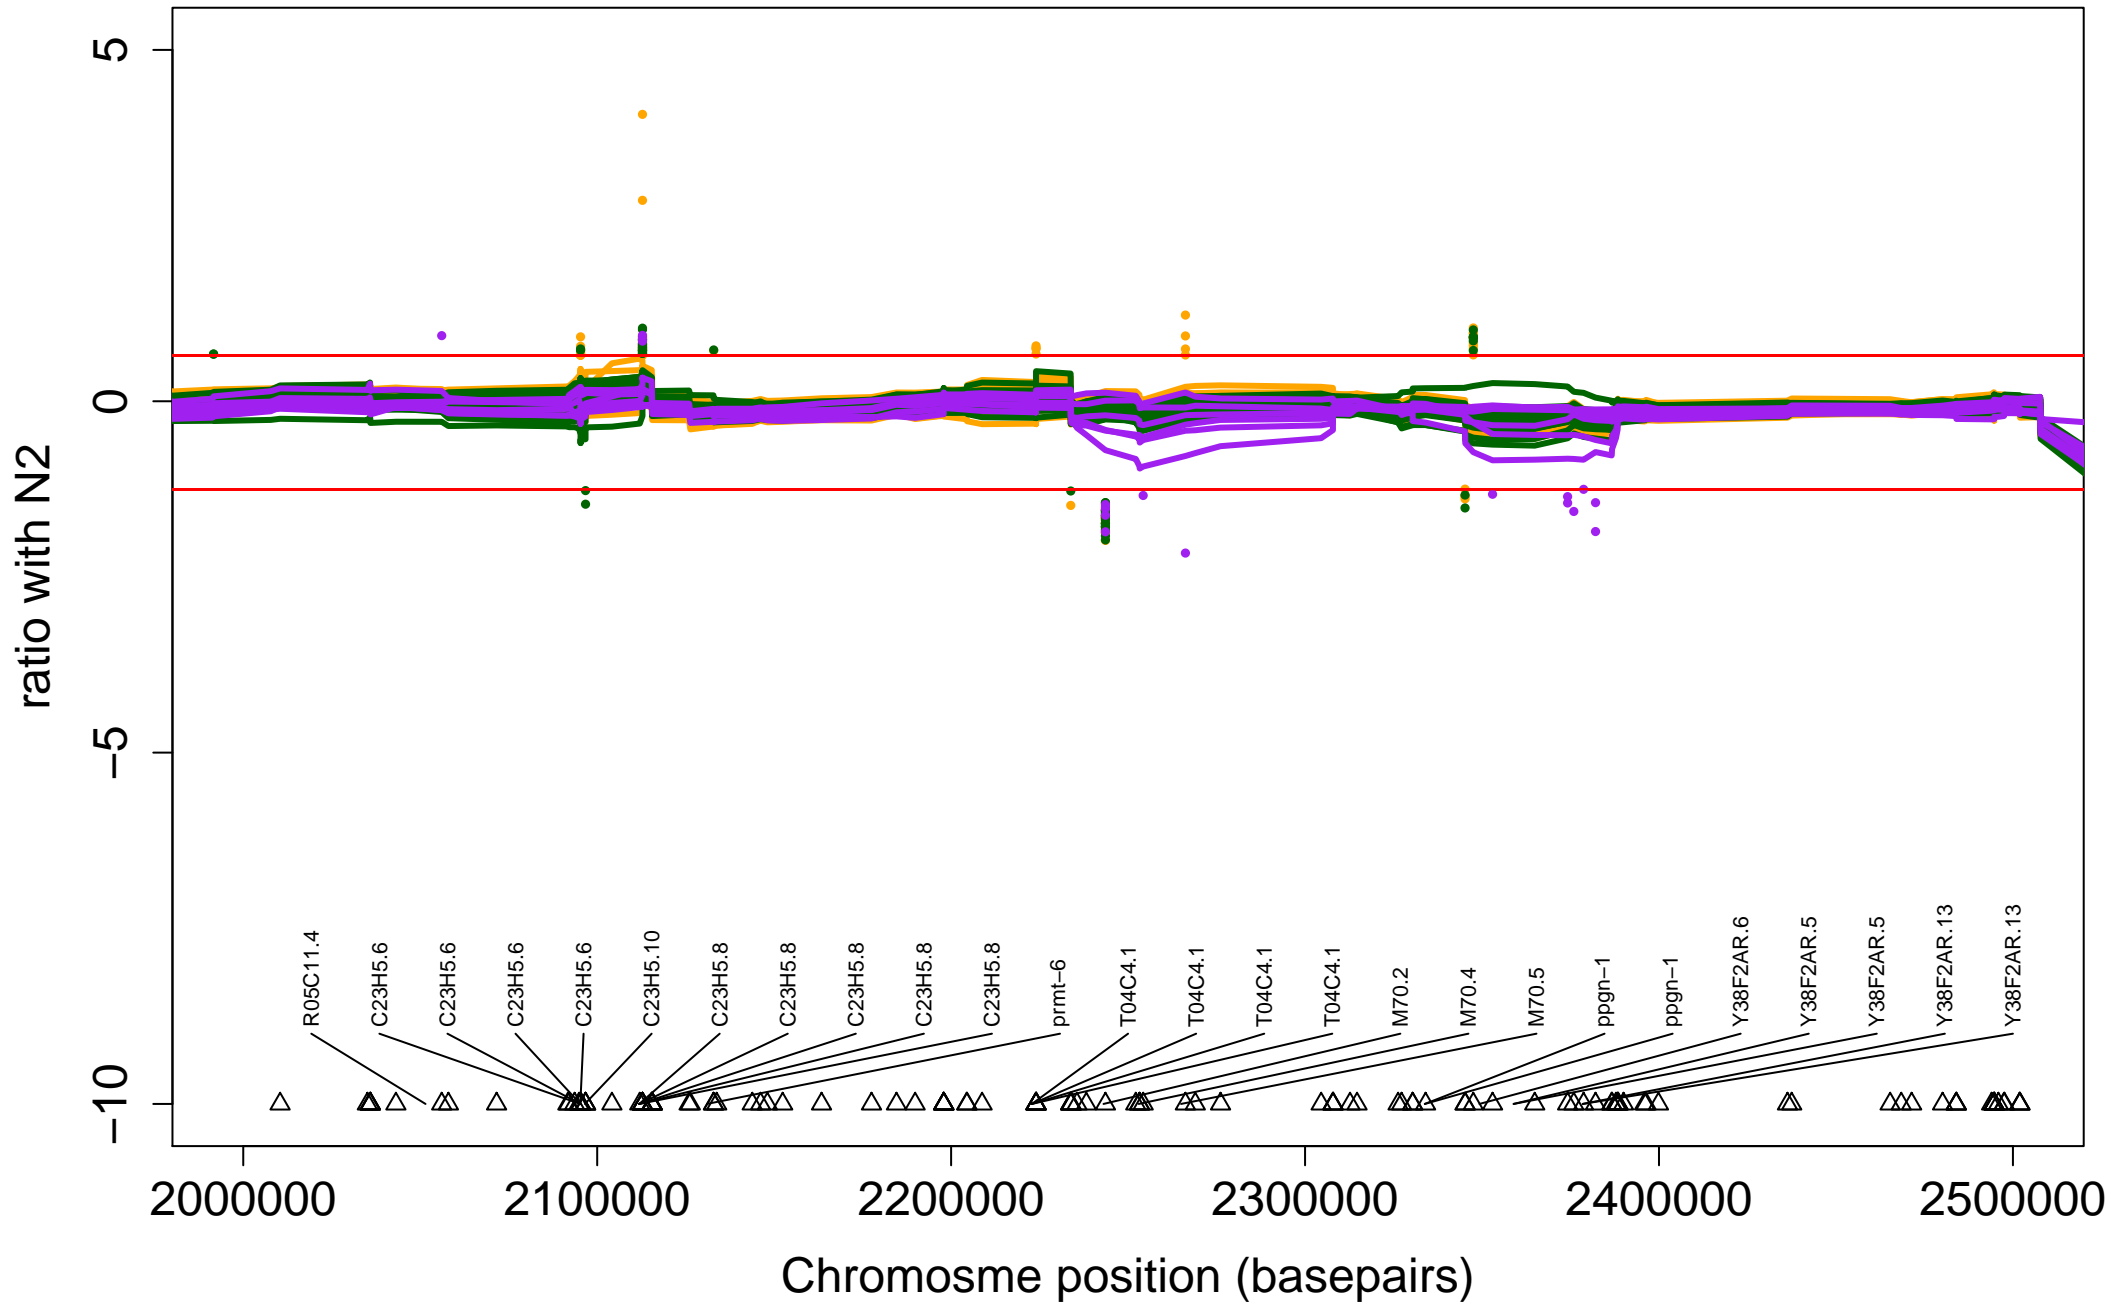

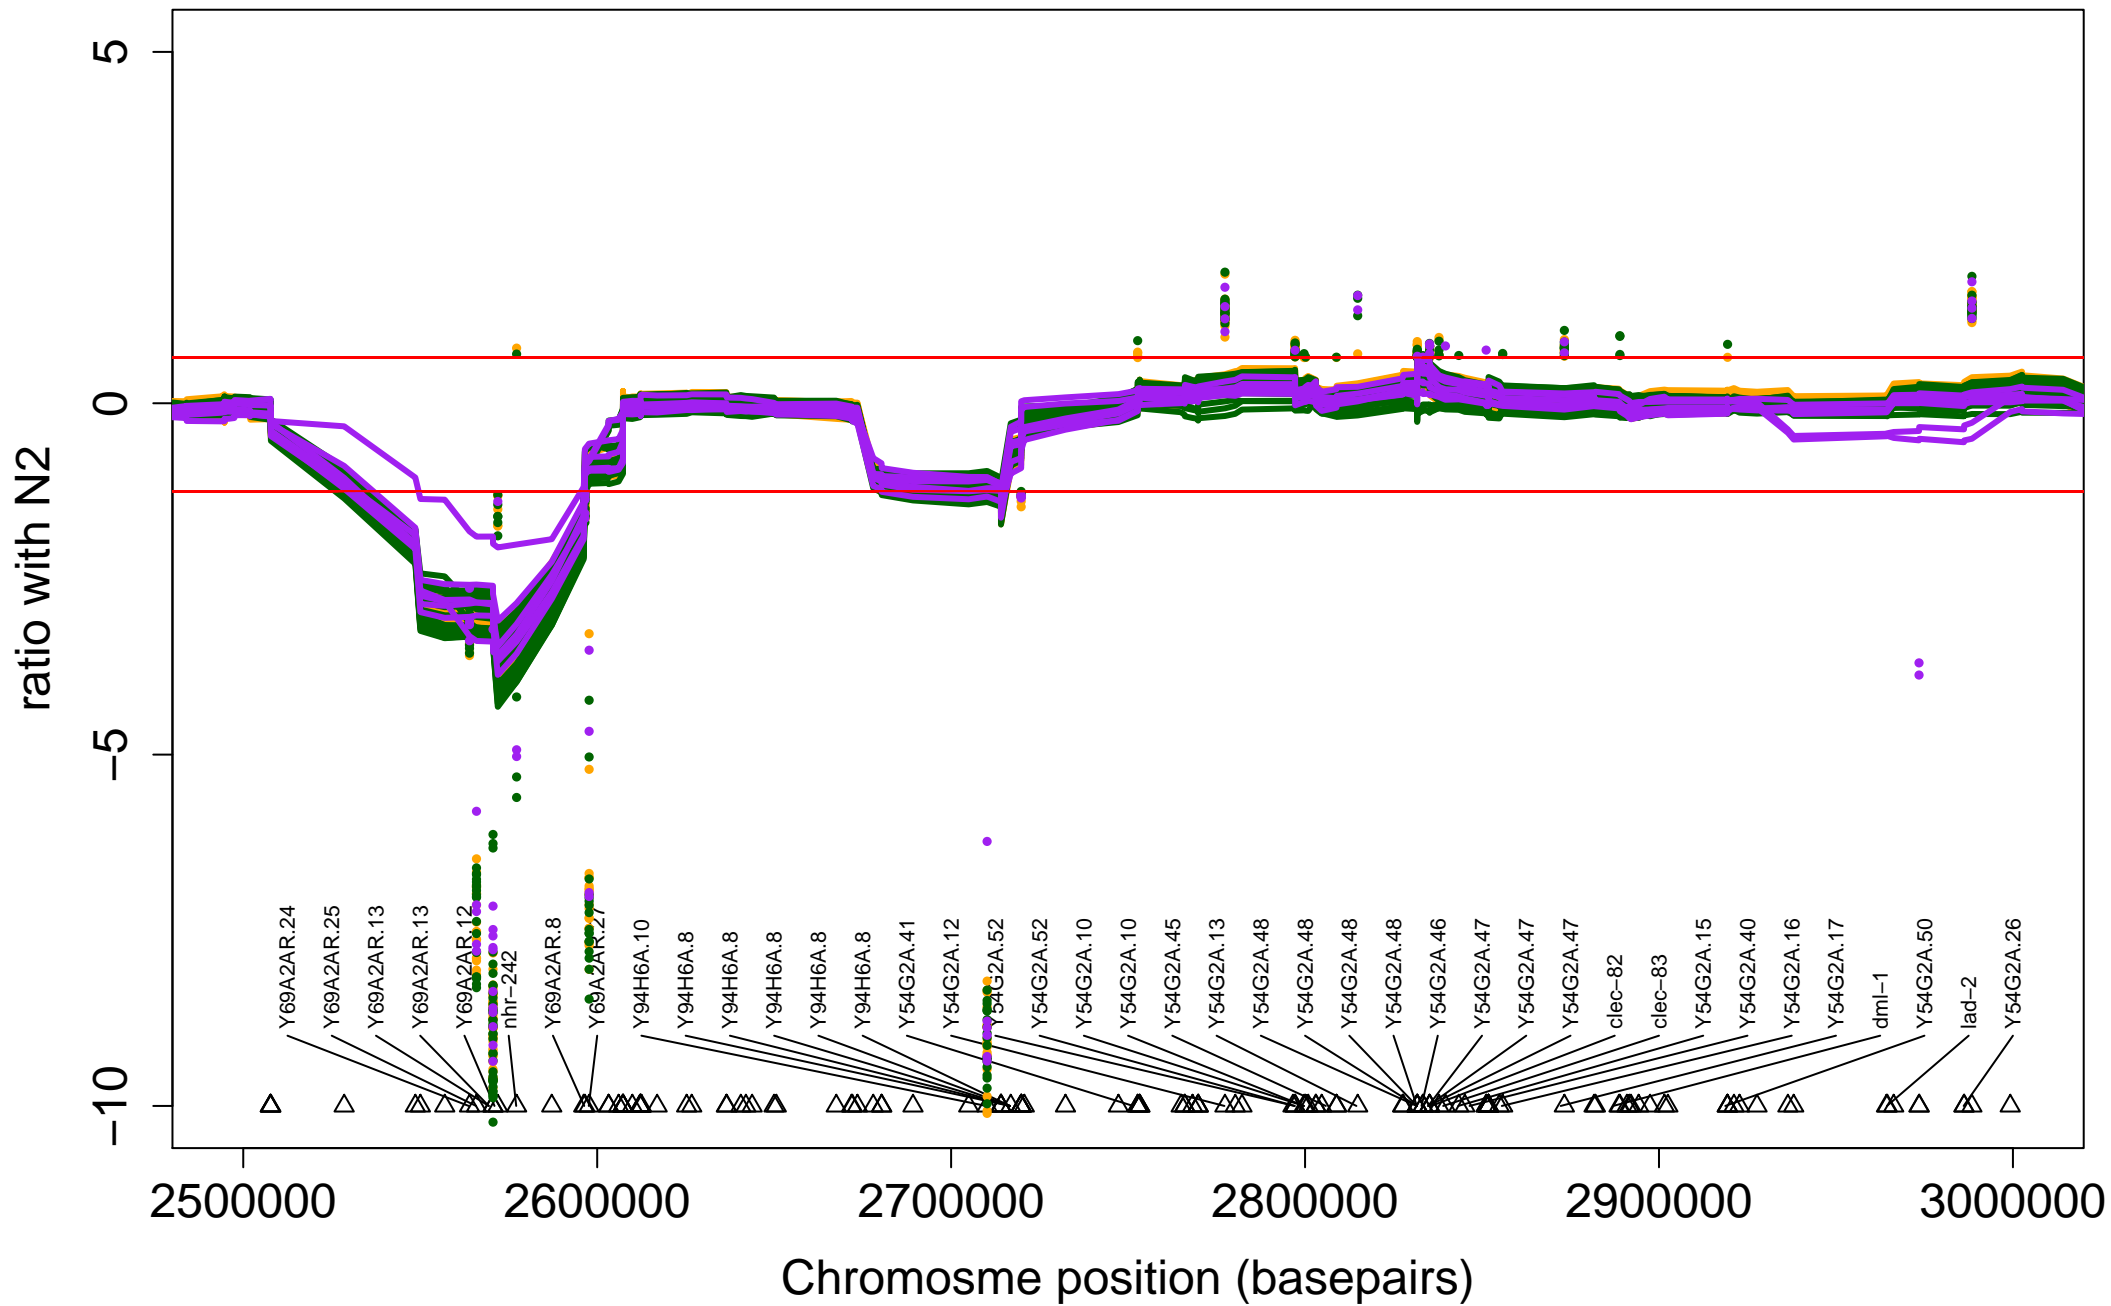

IV

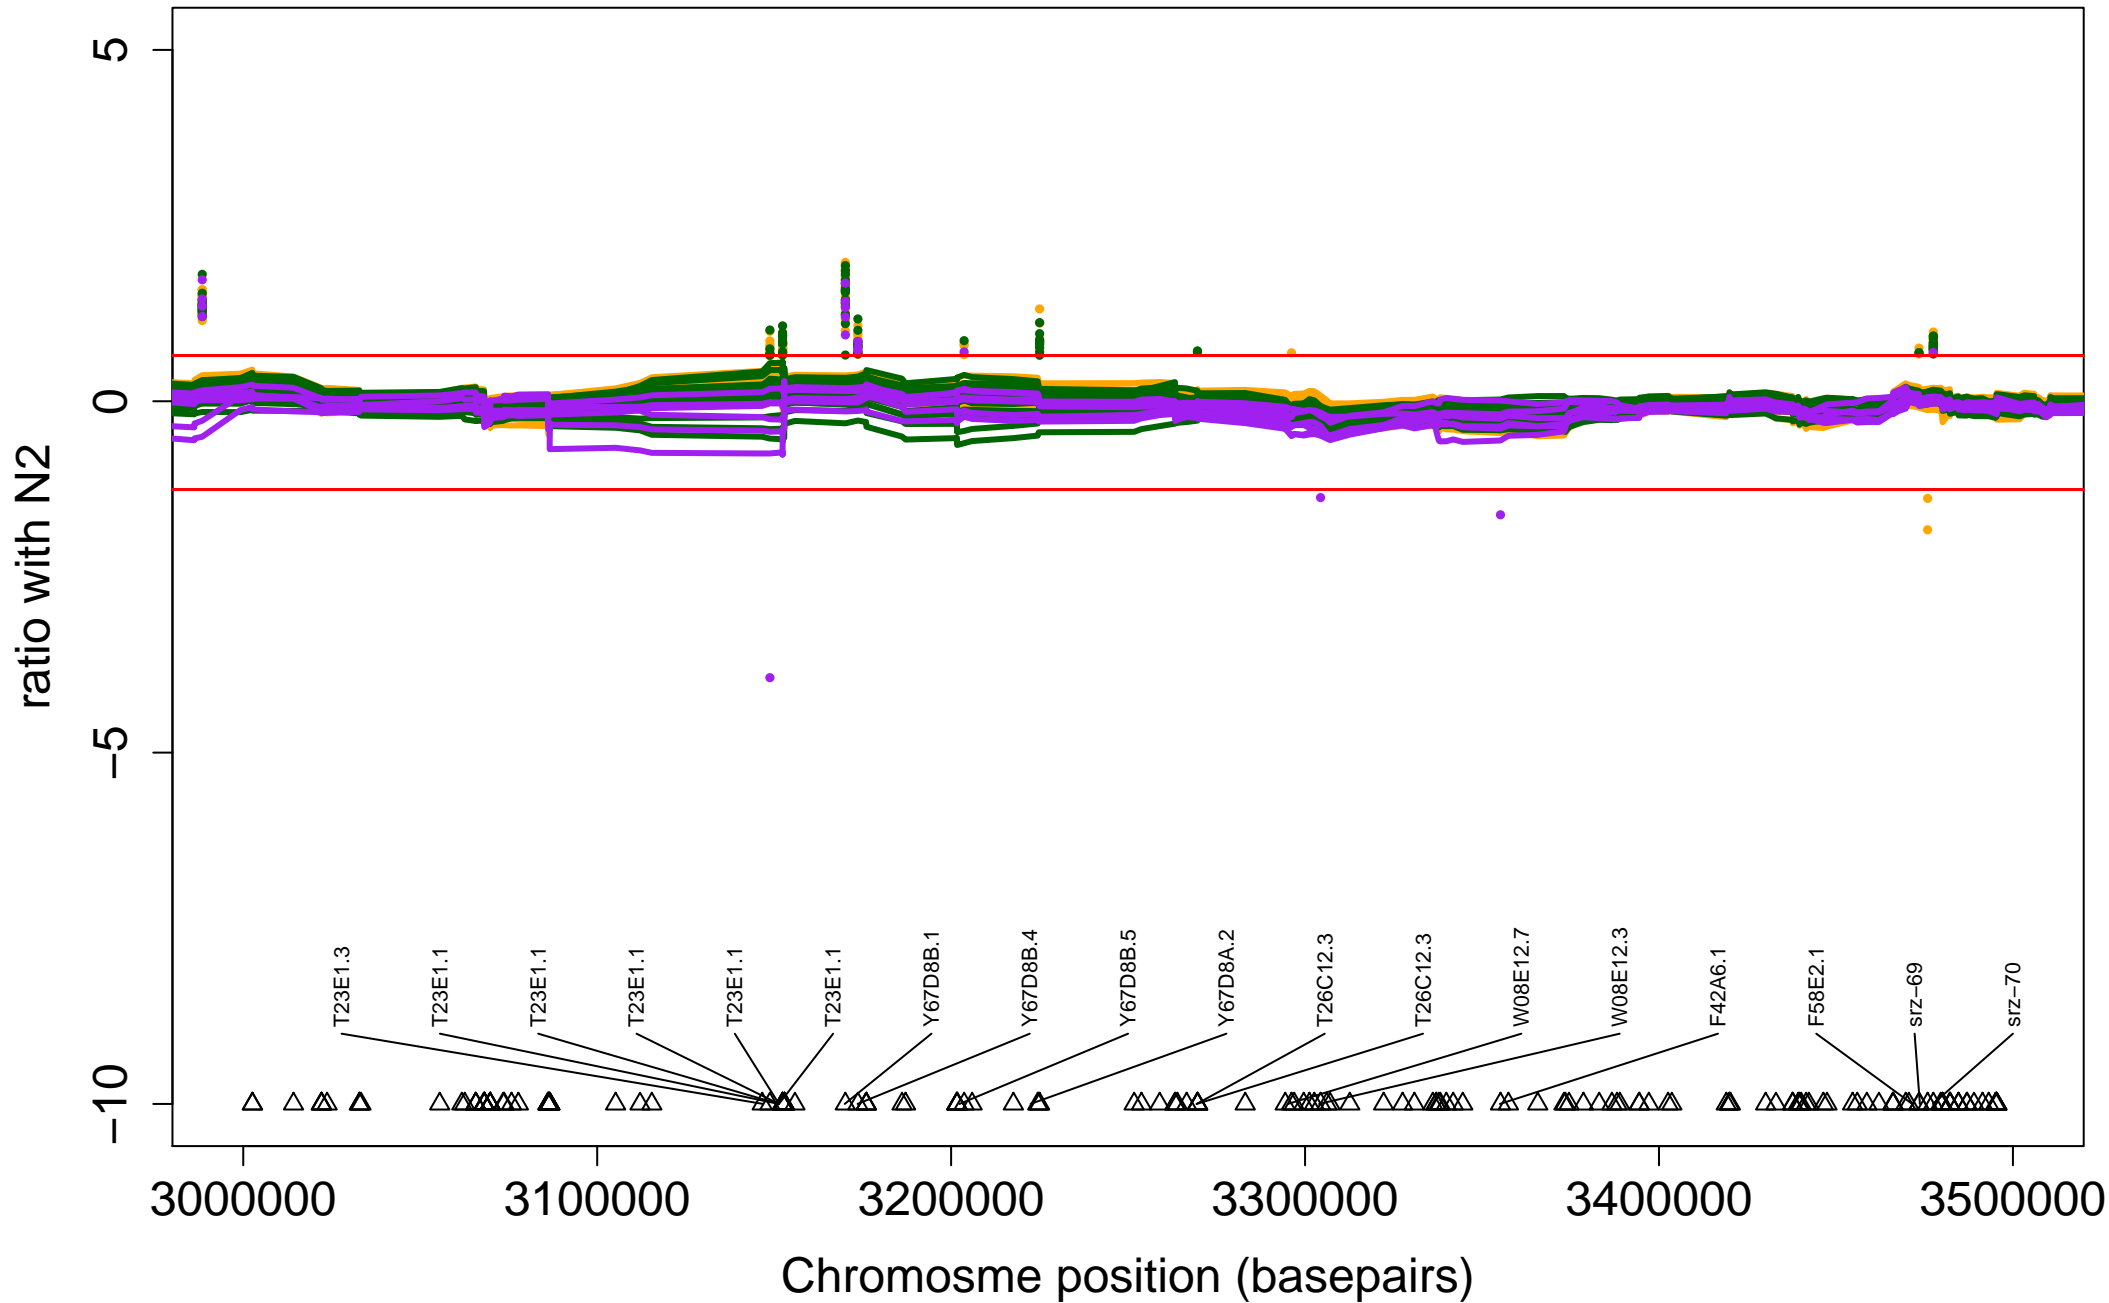

IV

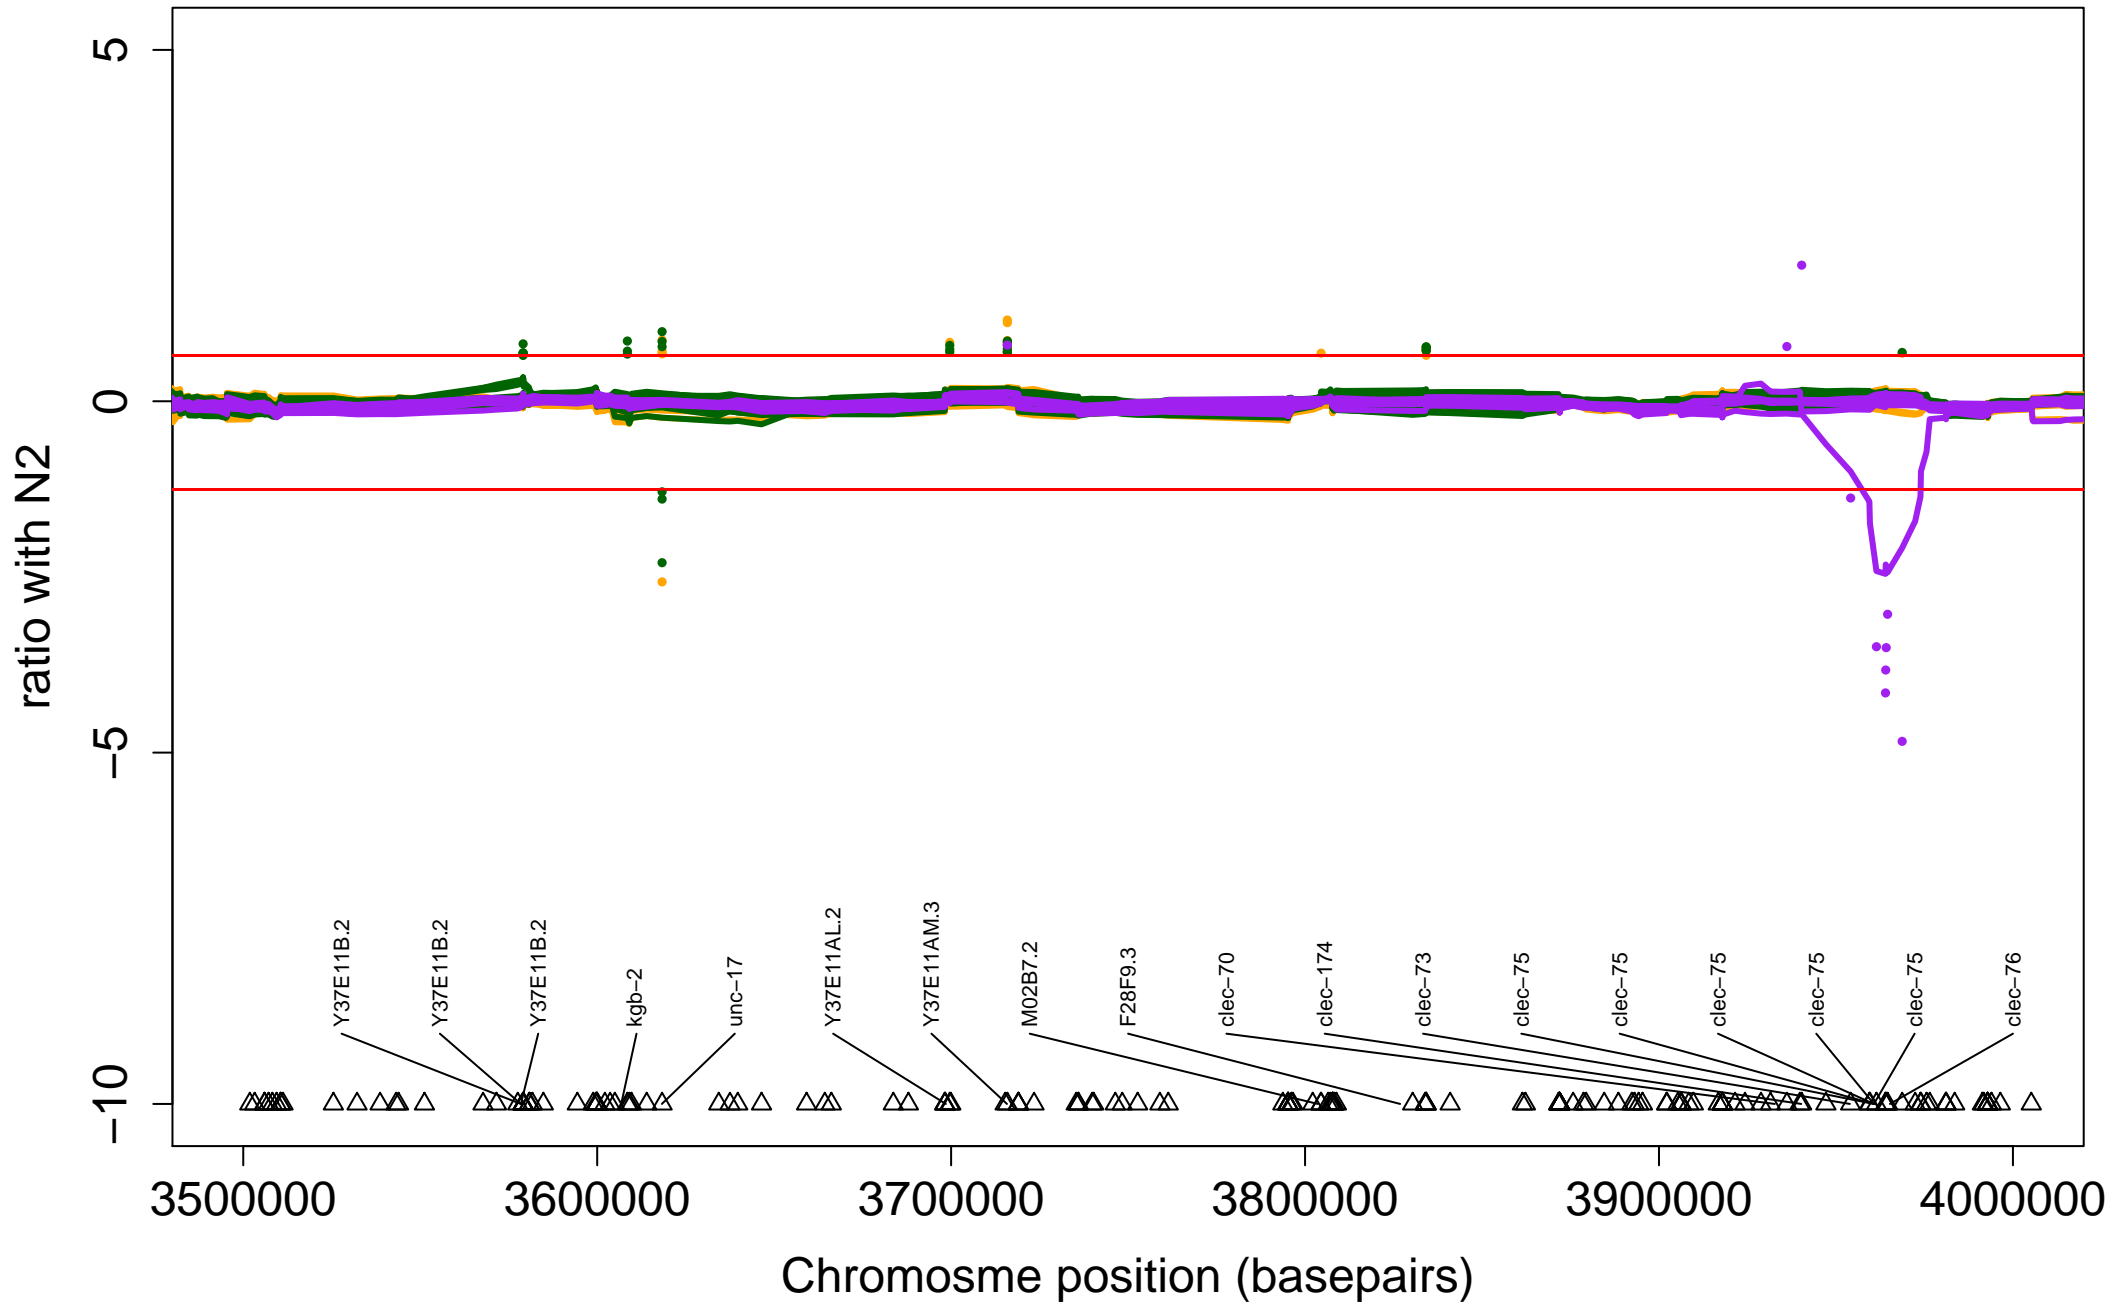

## IV

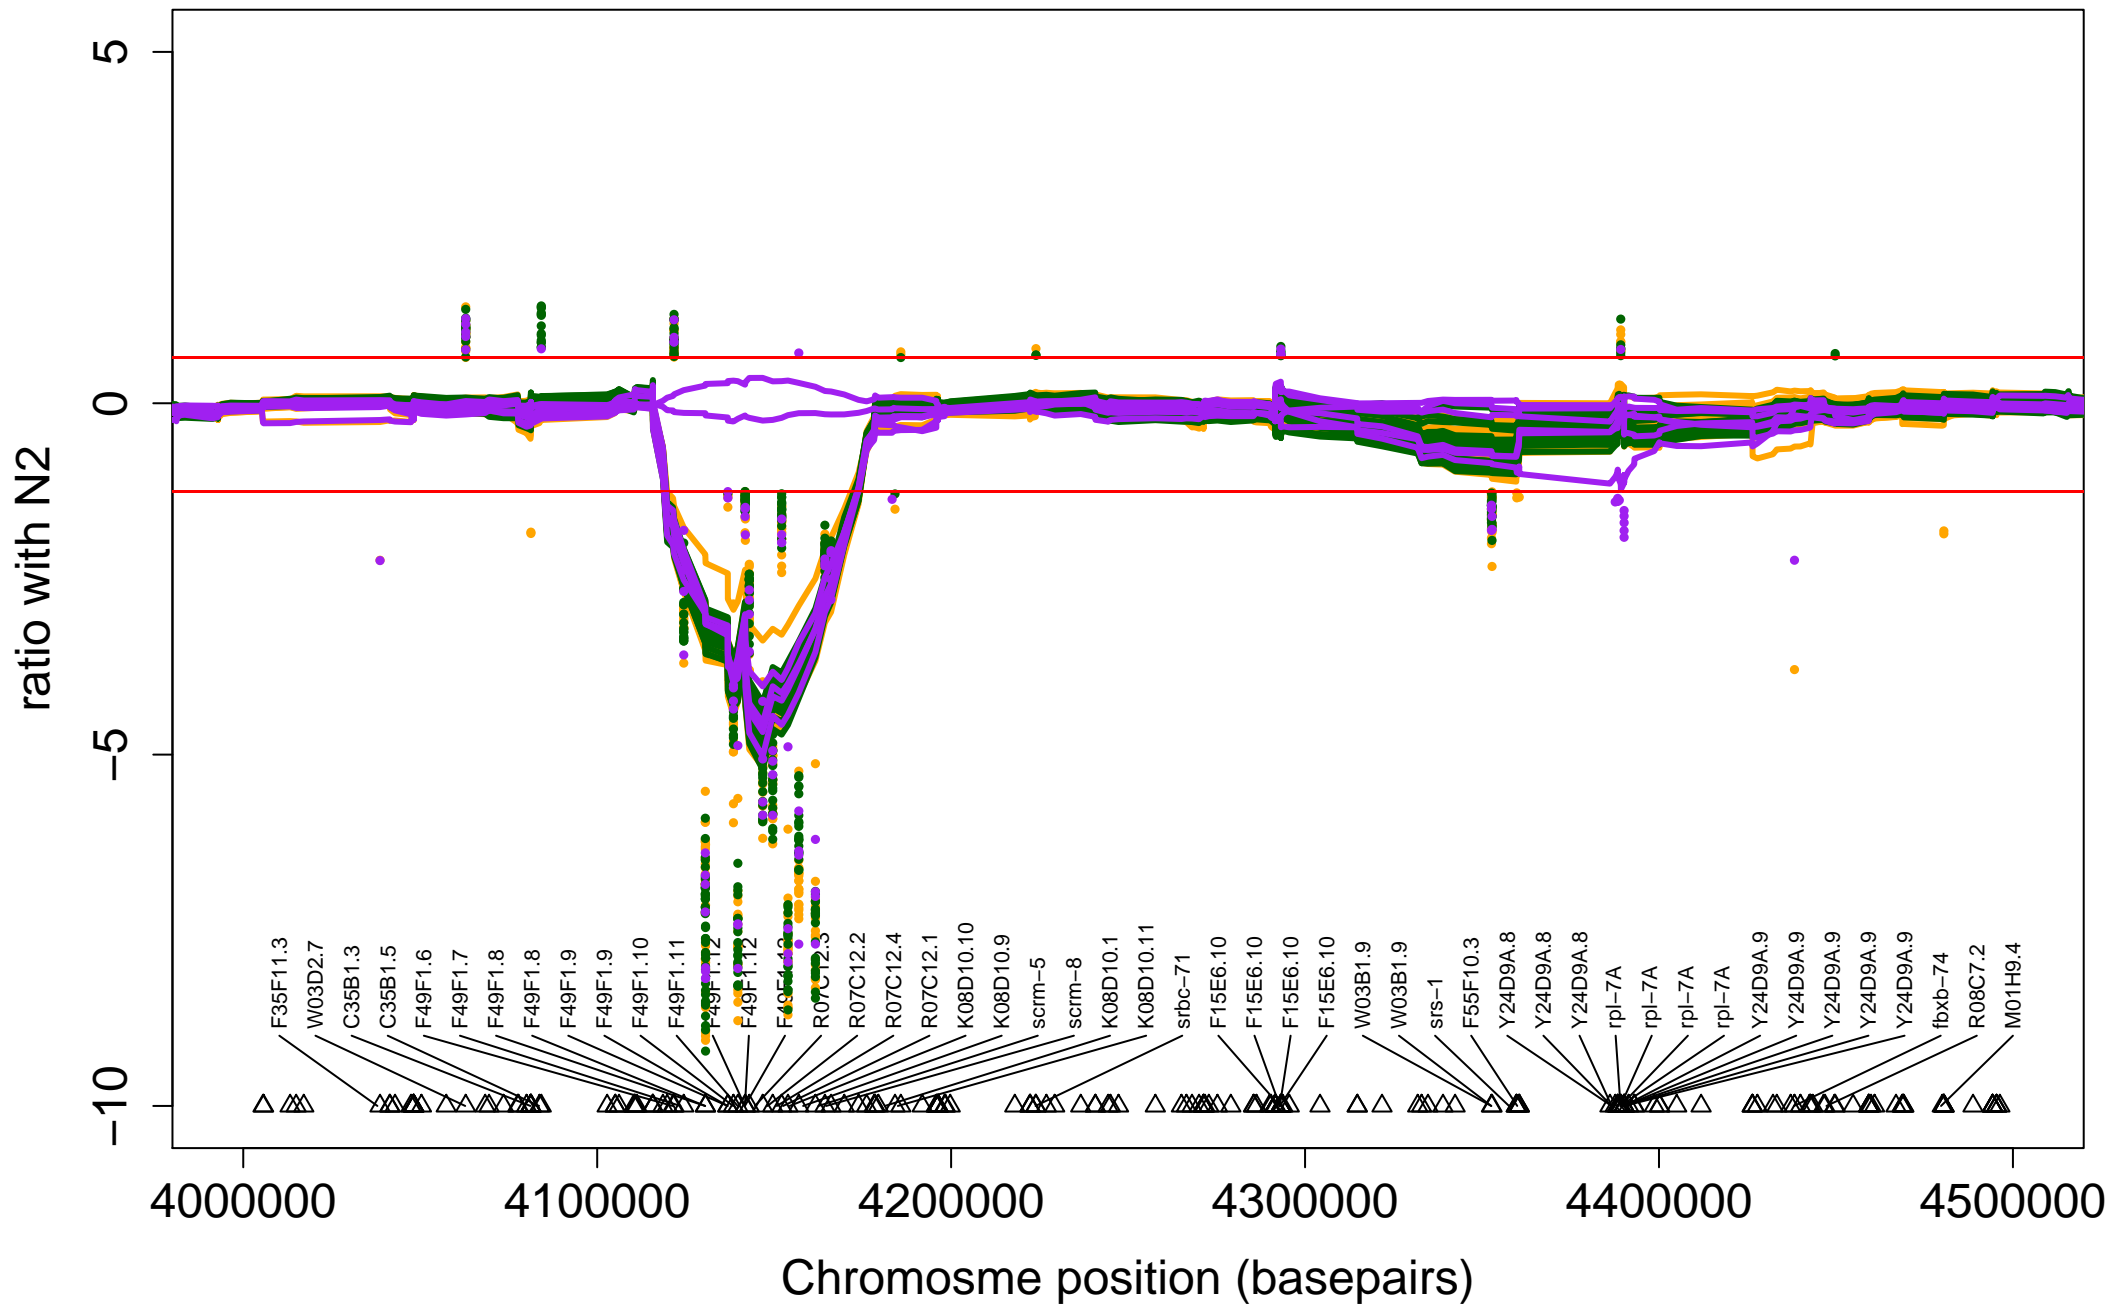

## IV

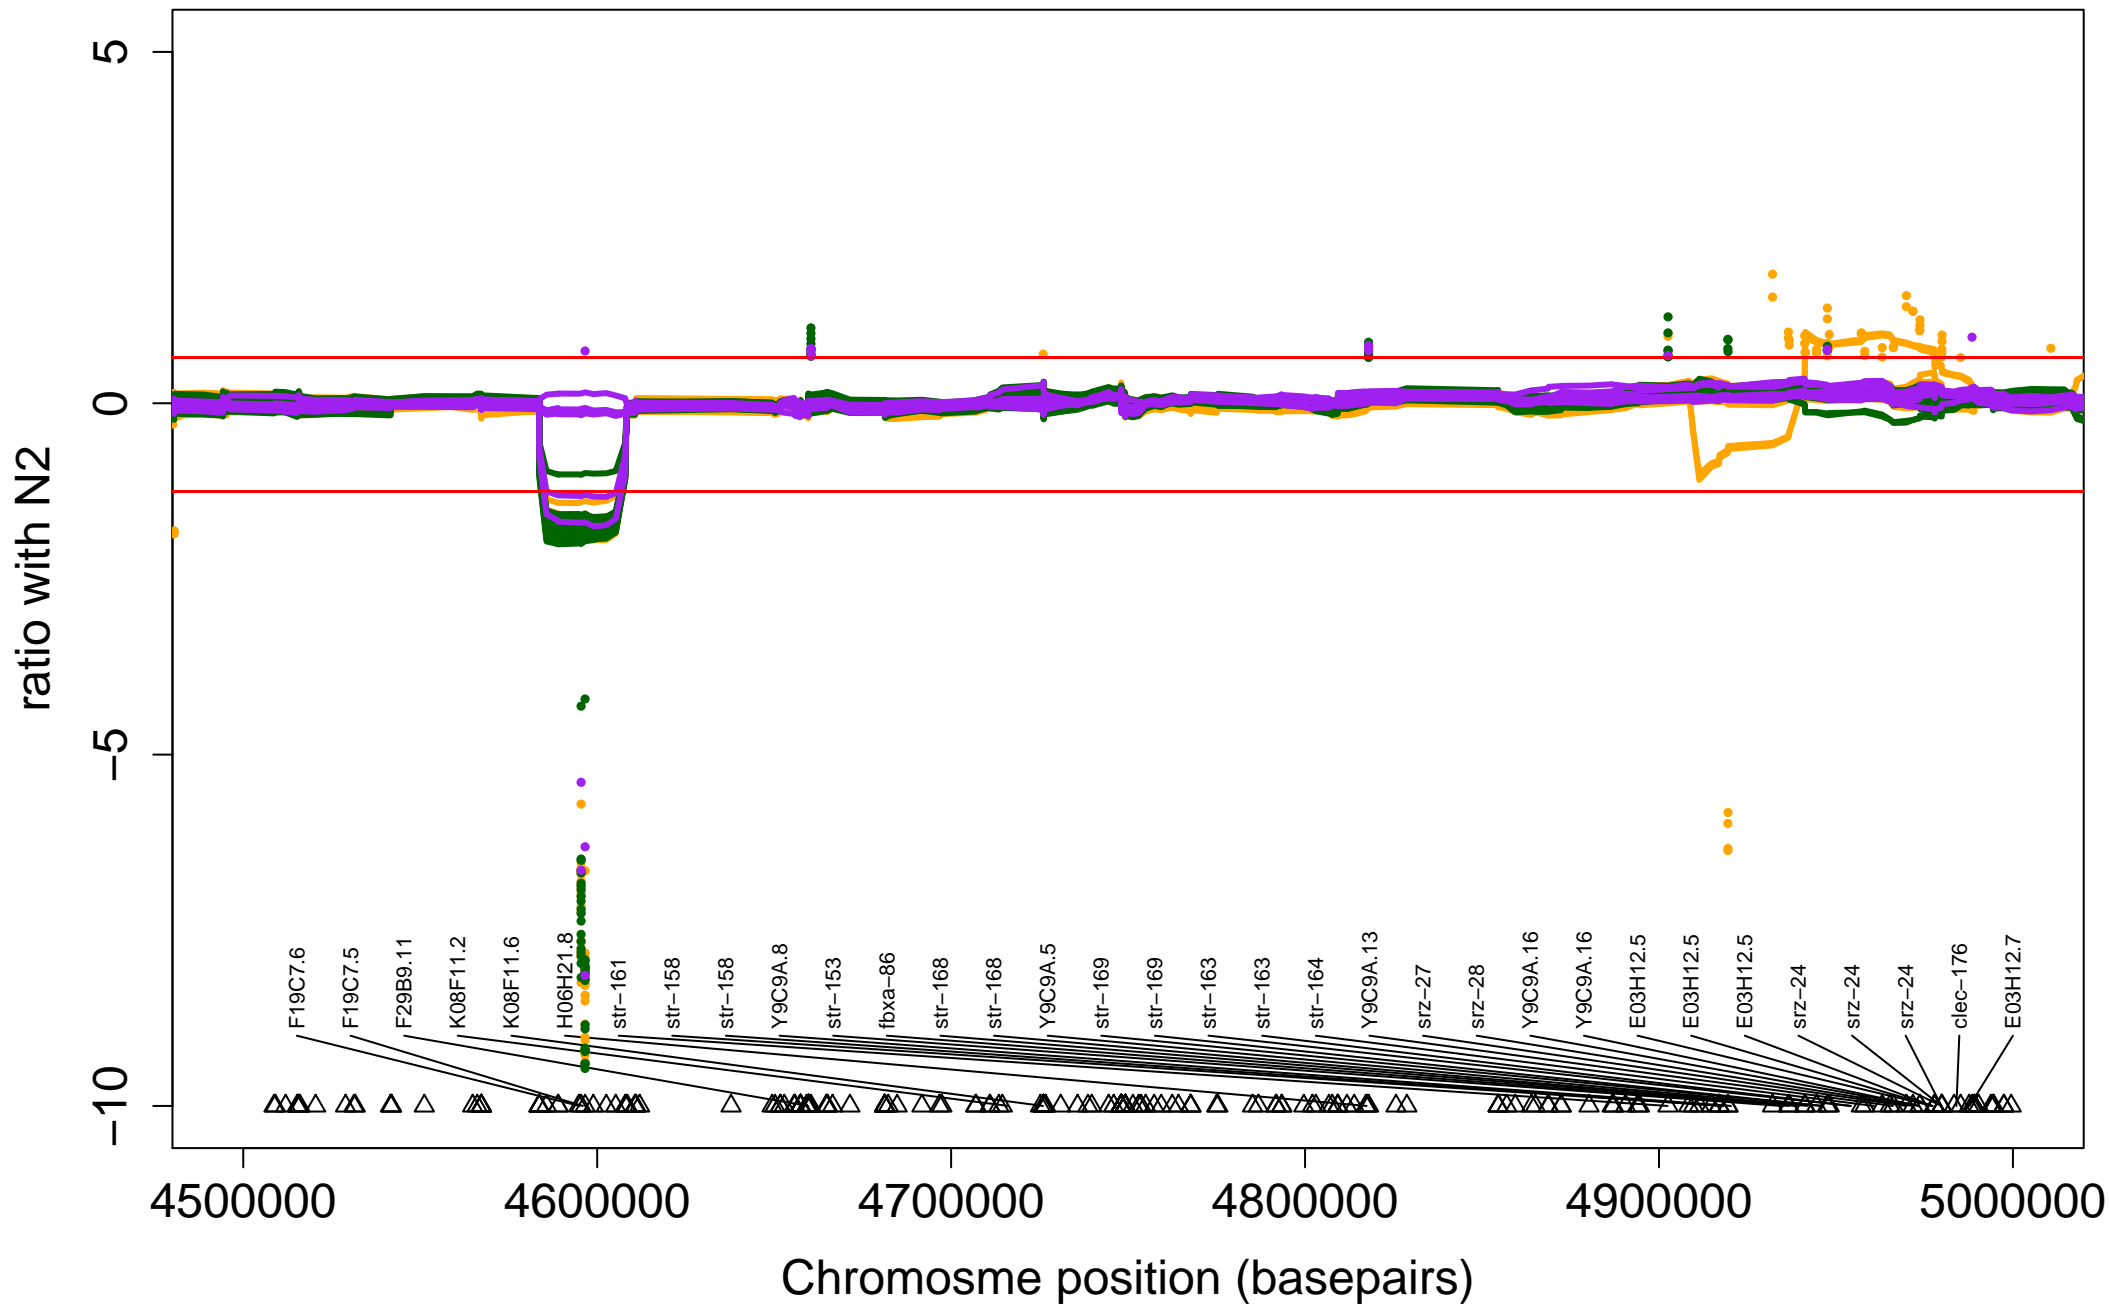

IV

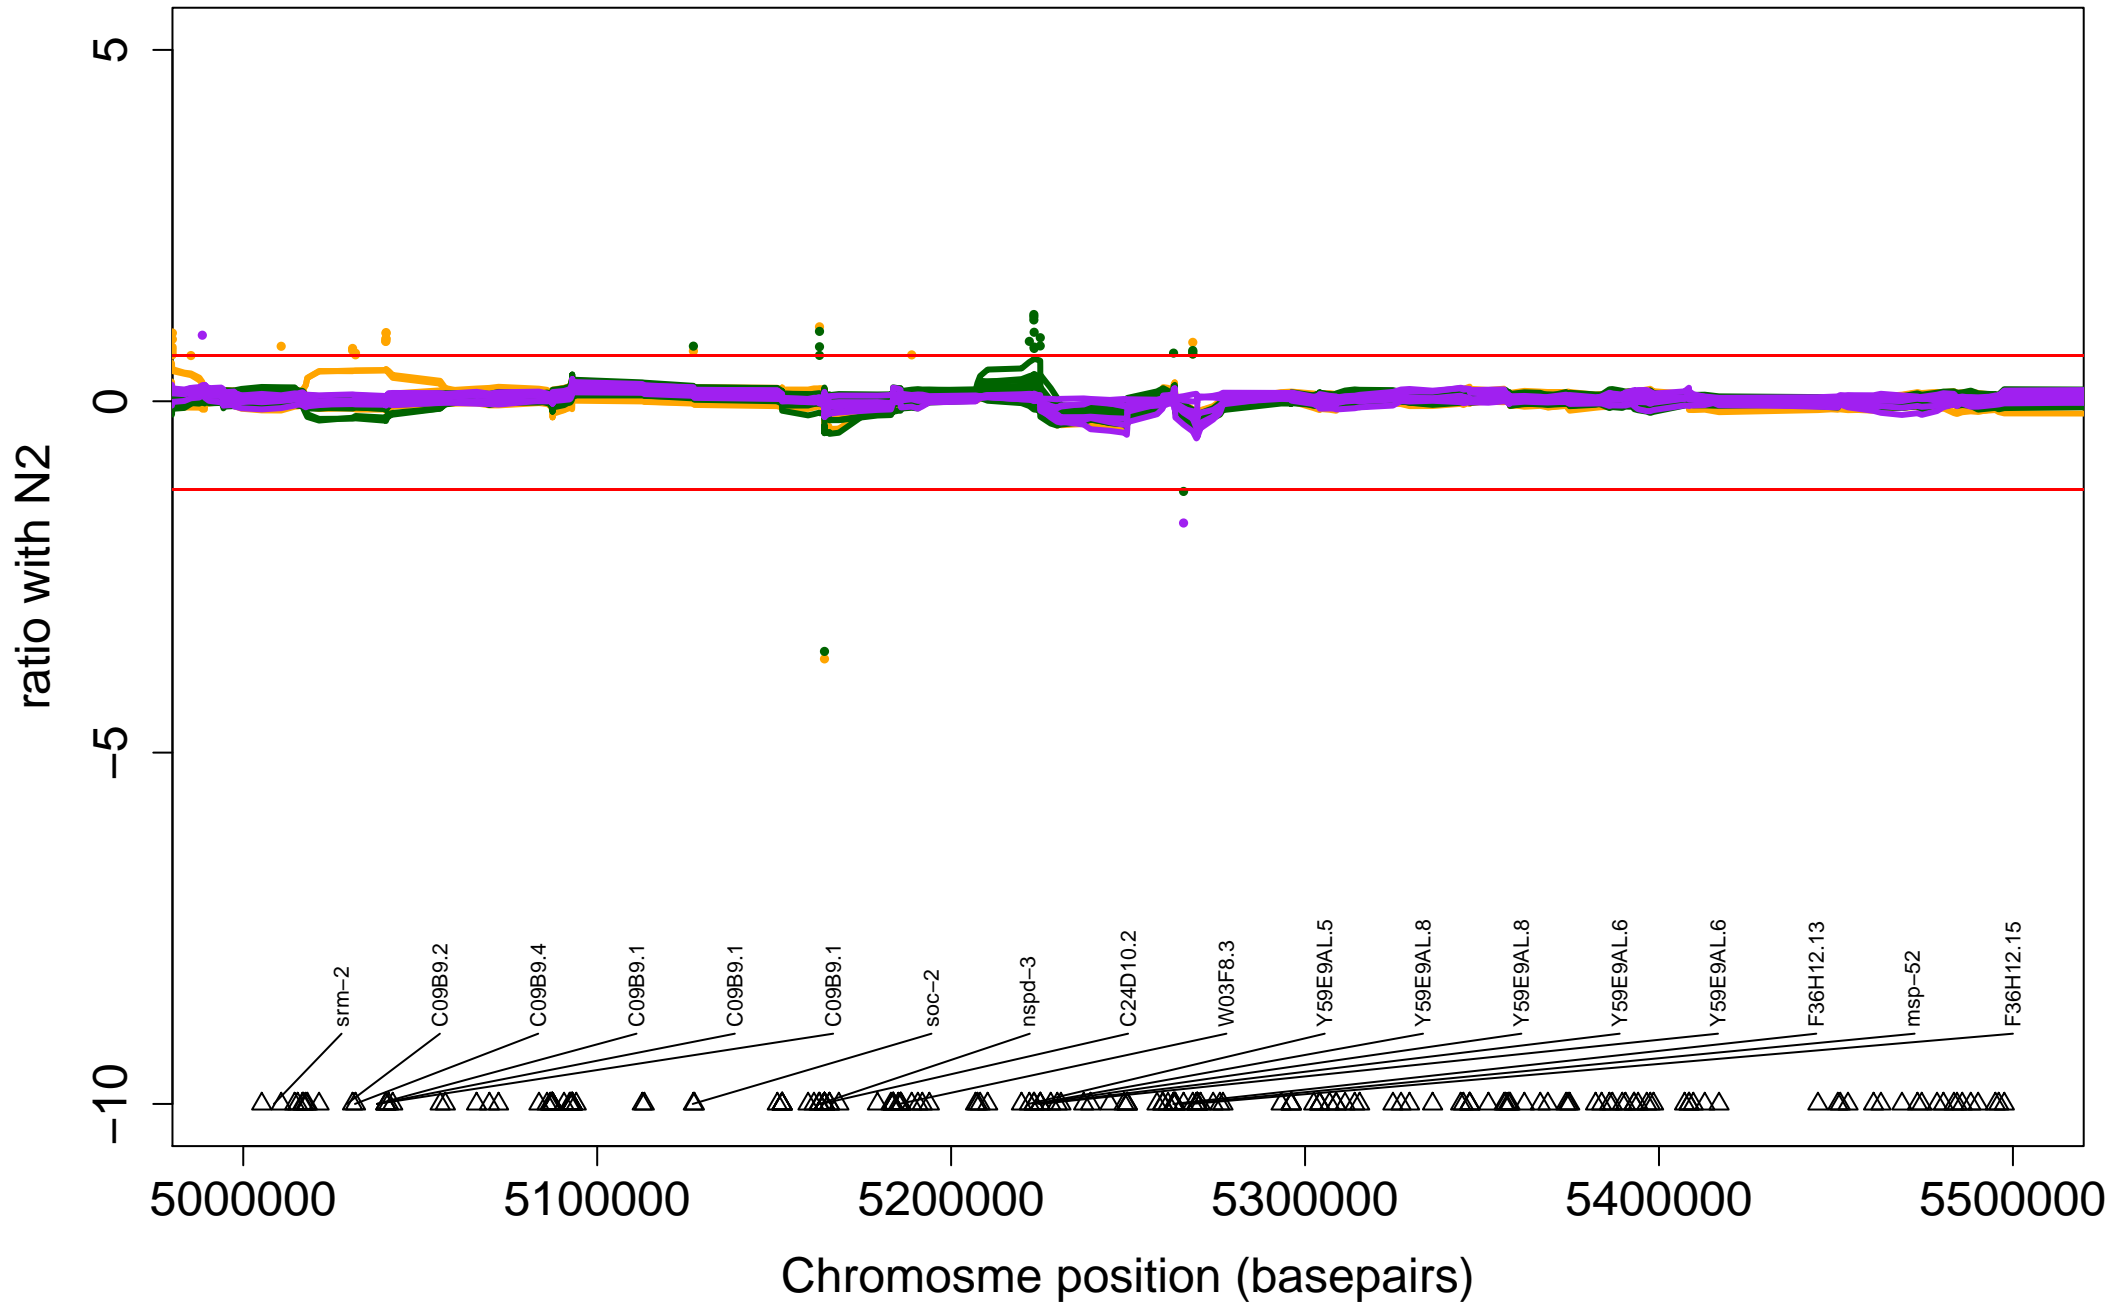

# IV

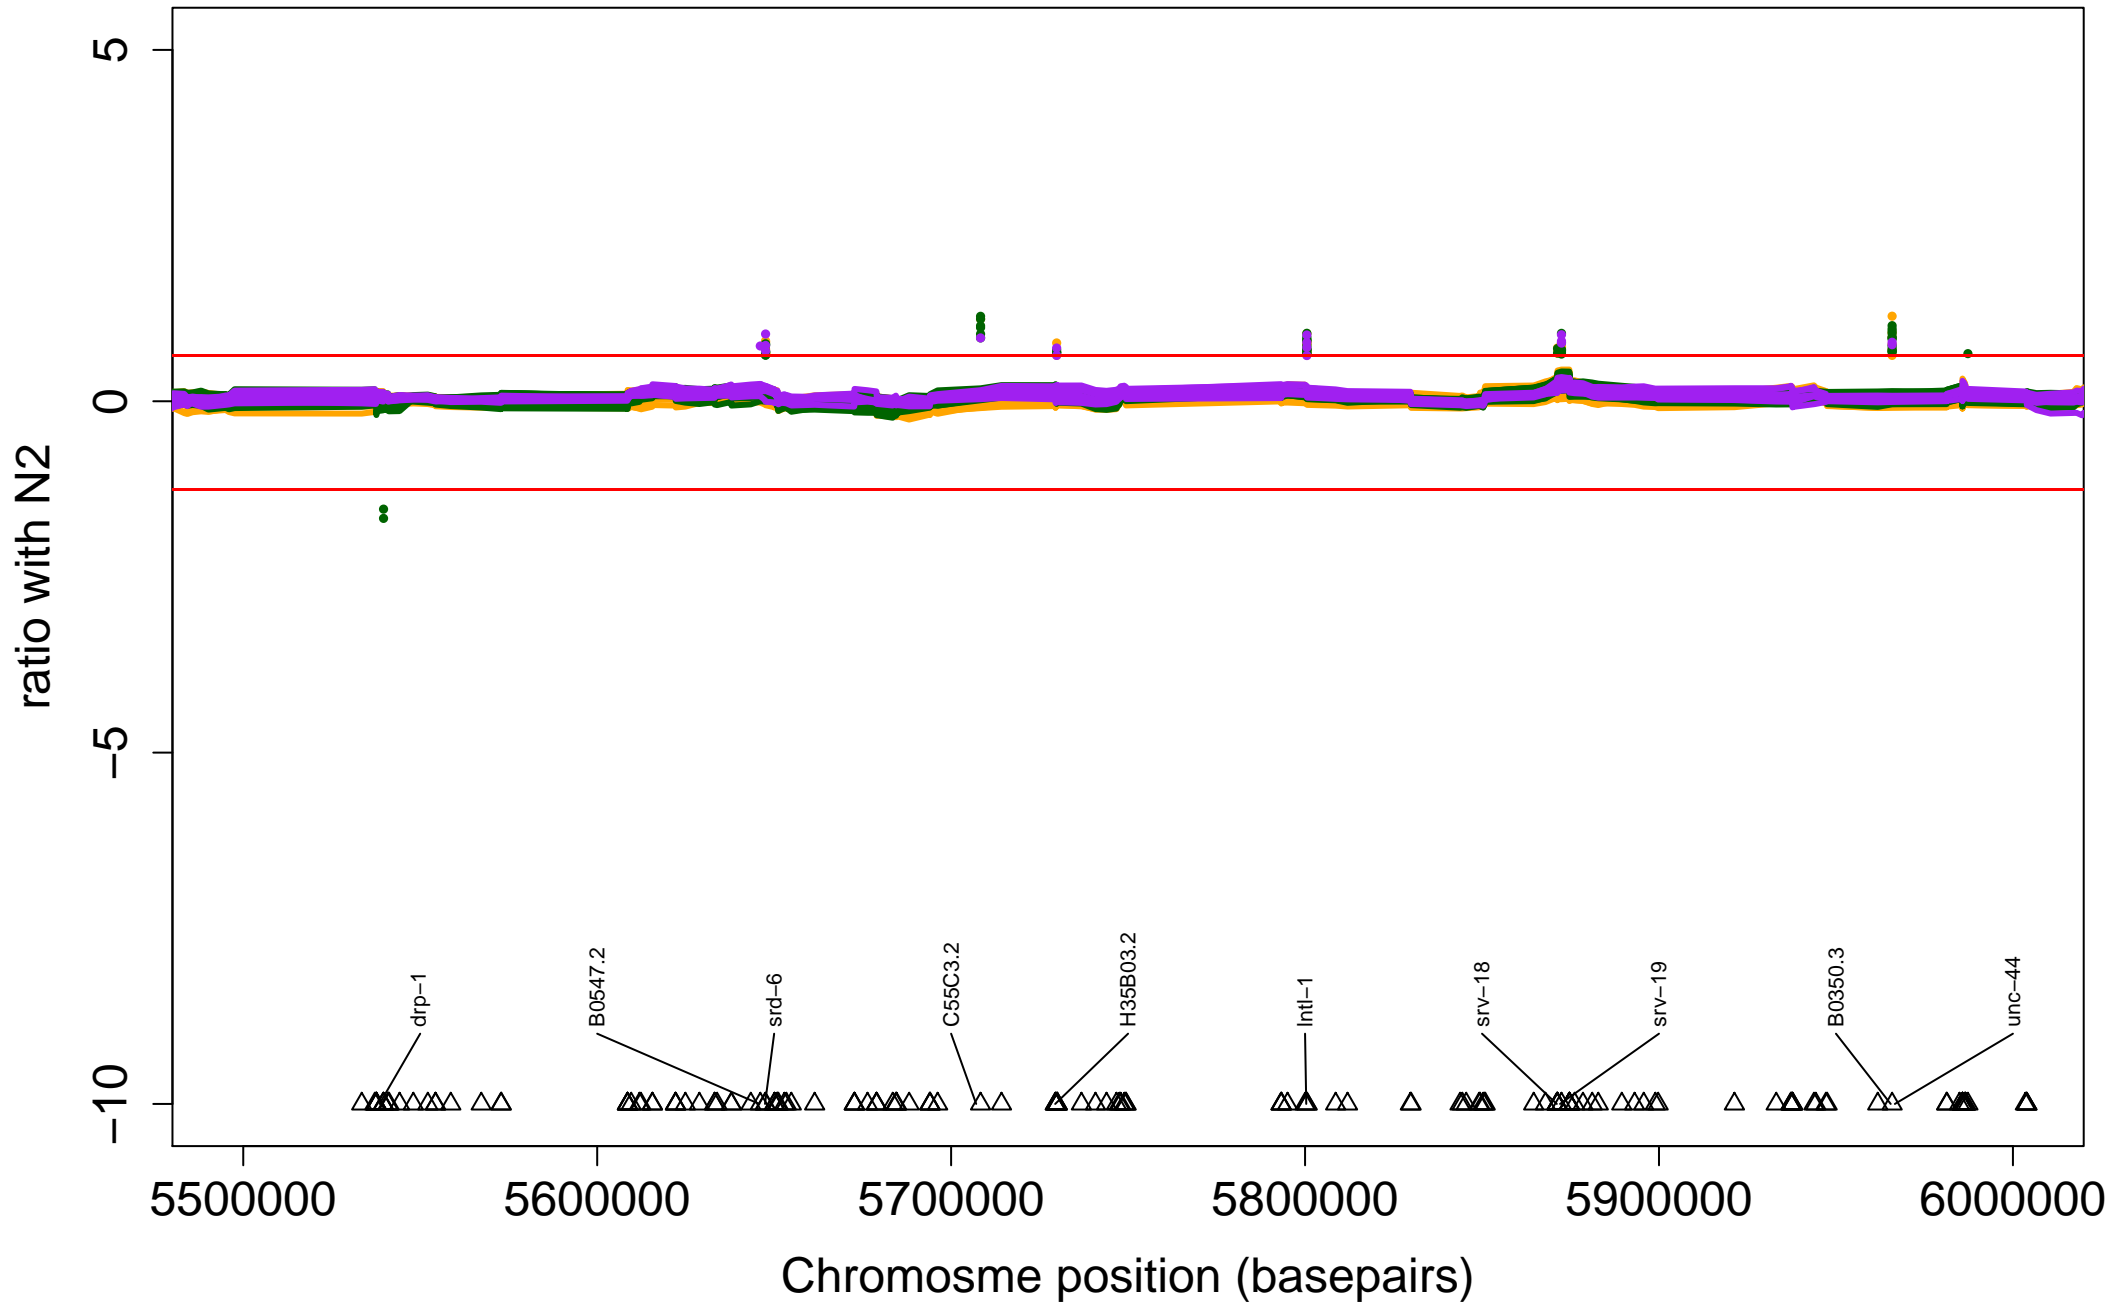



IV

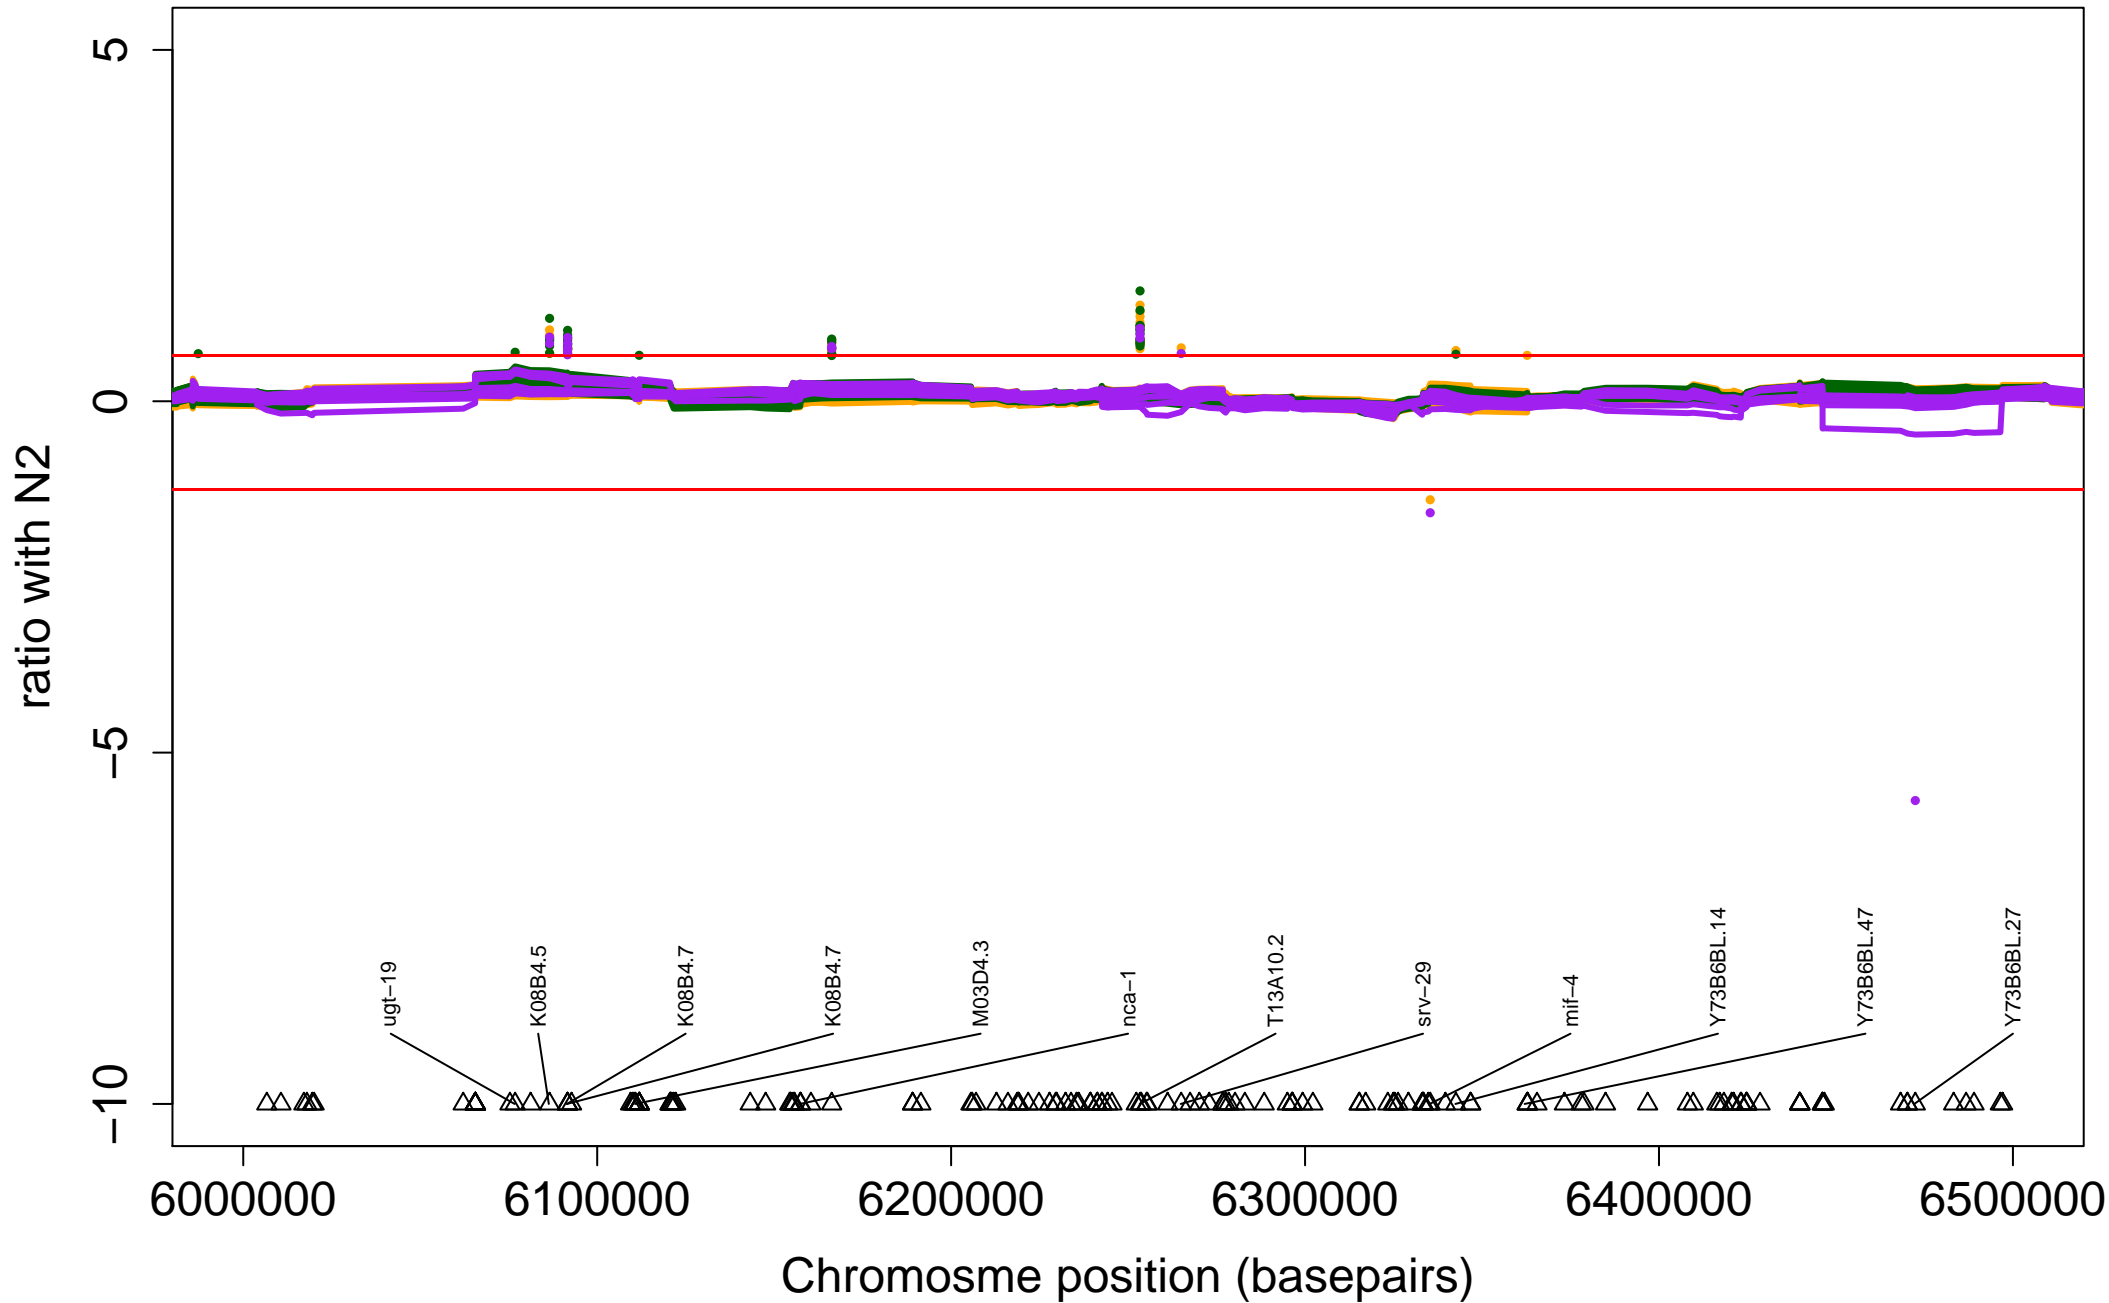

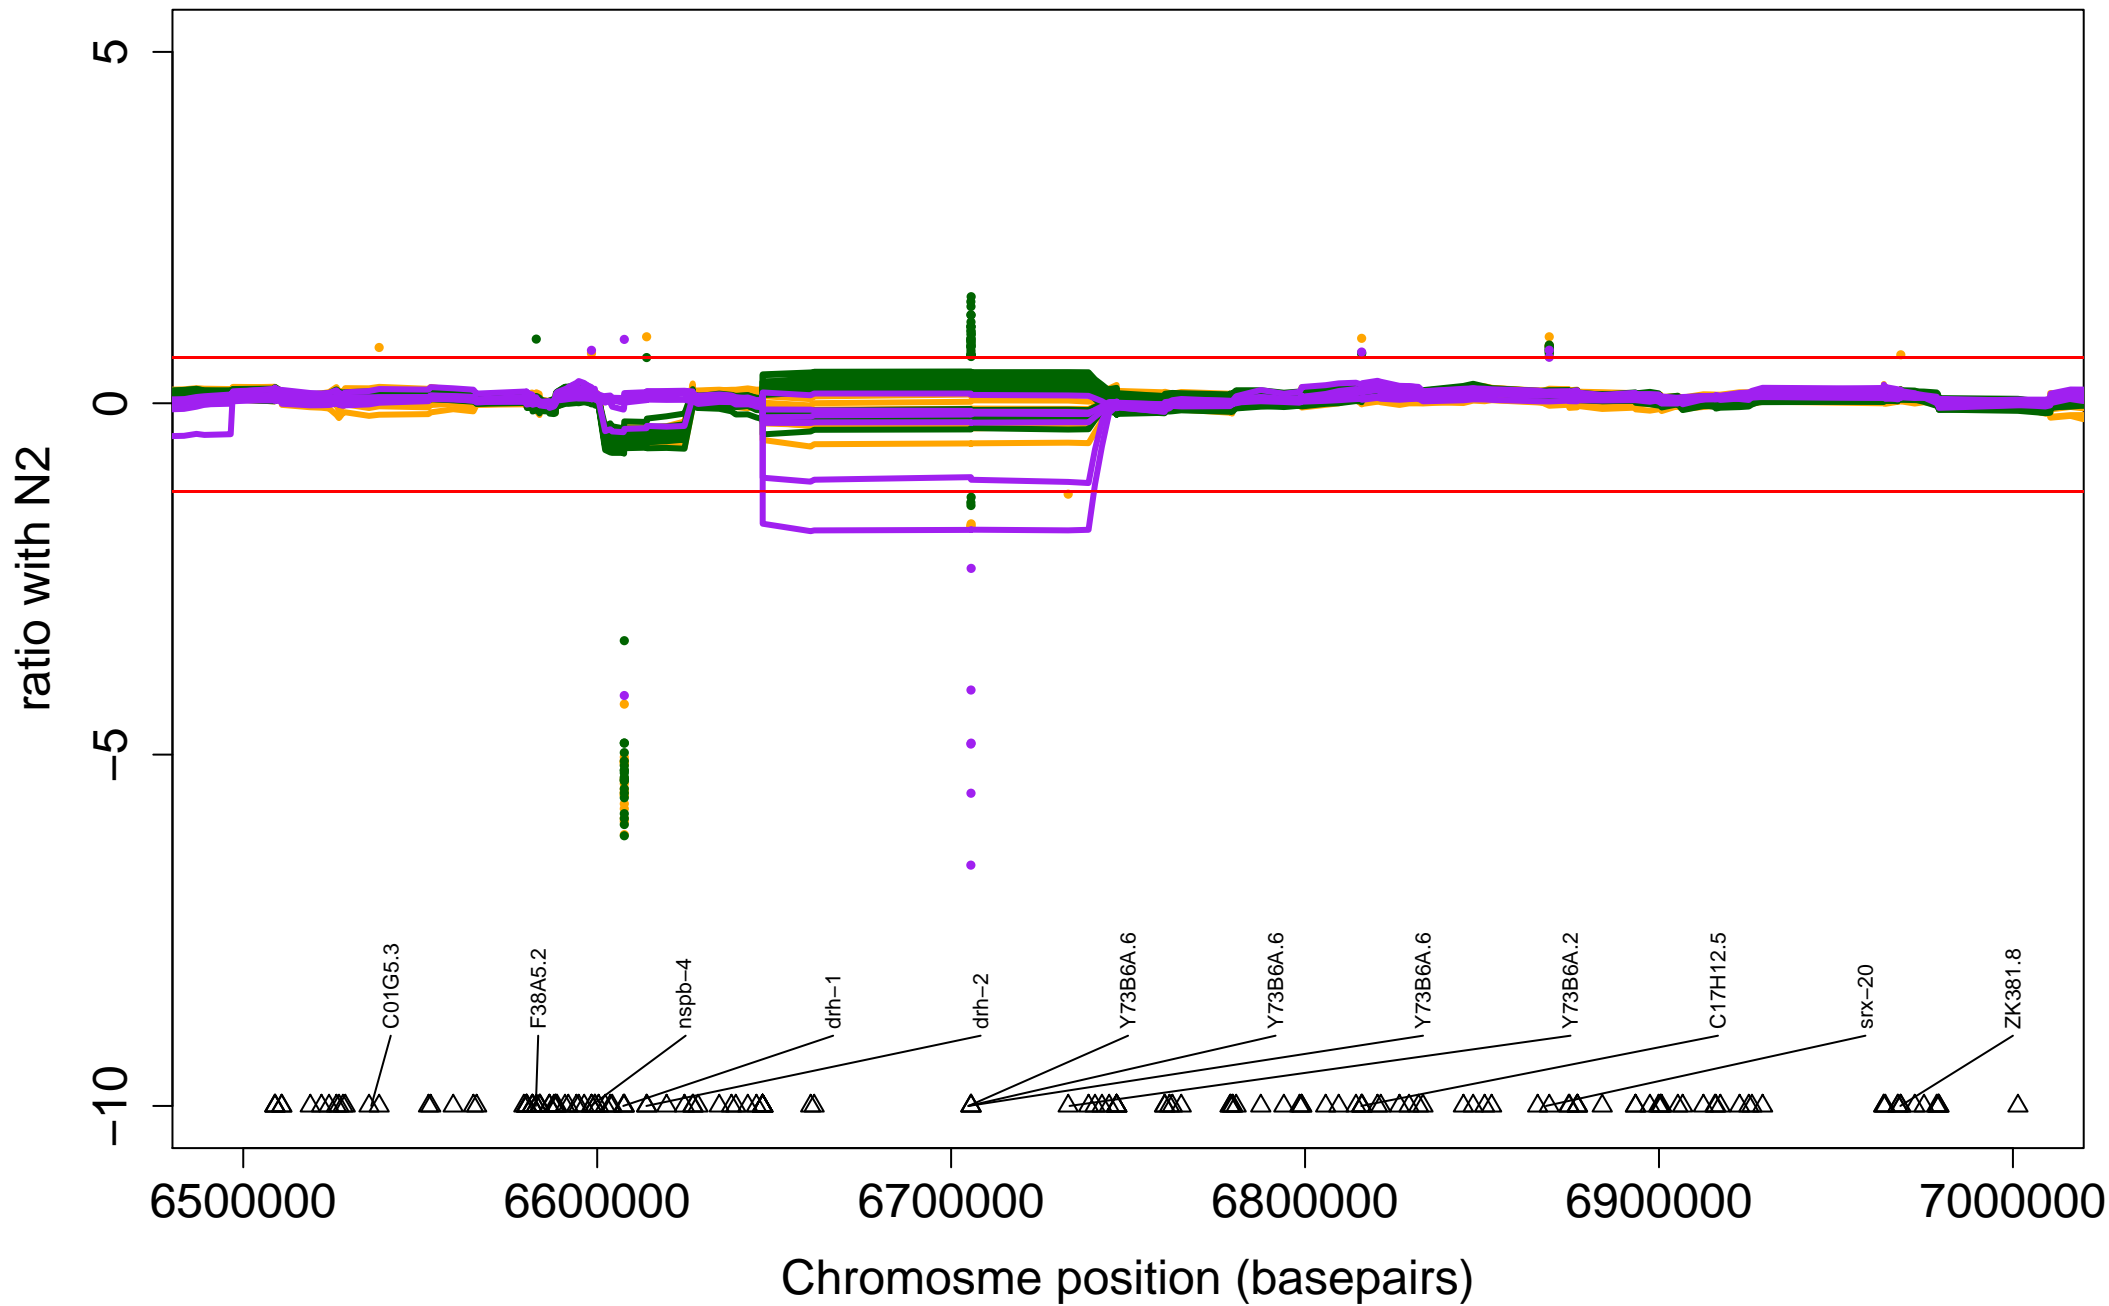

IV

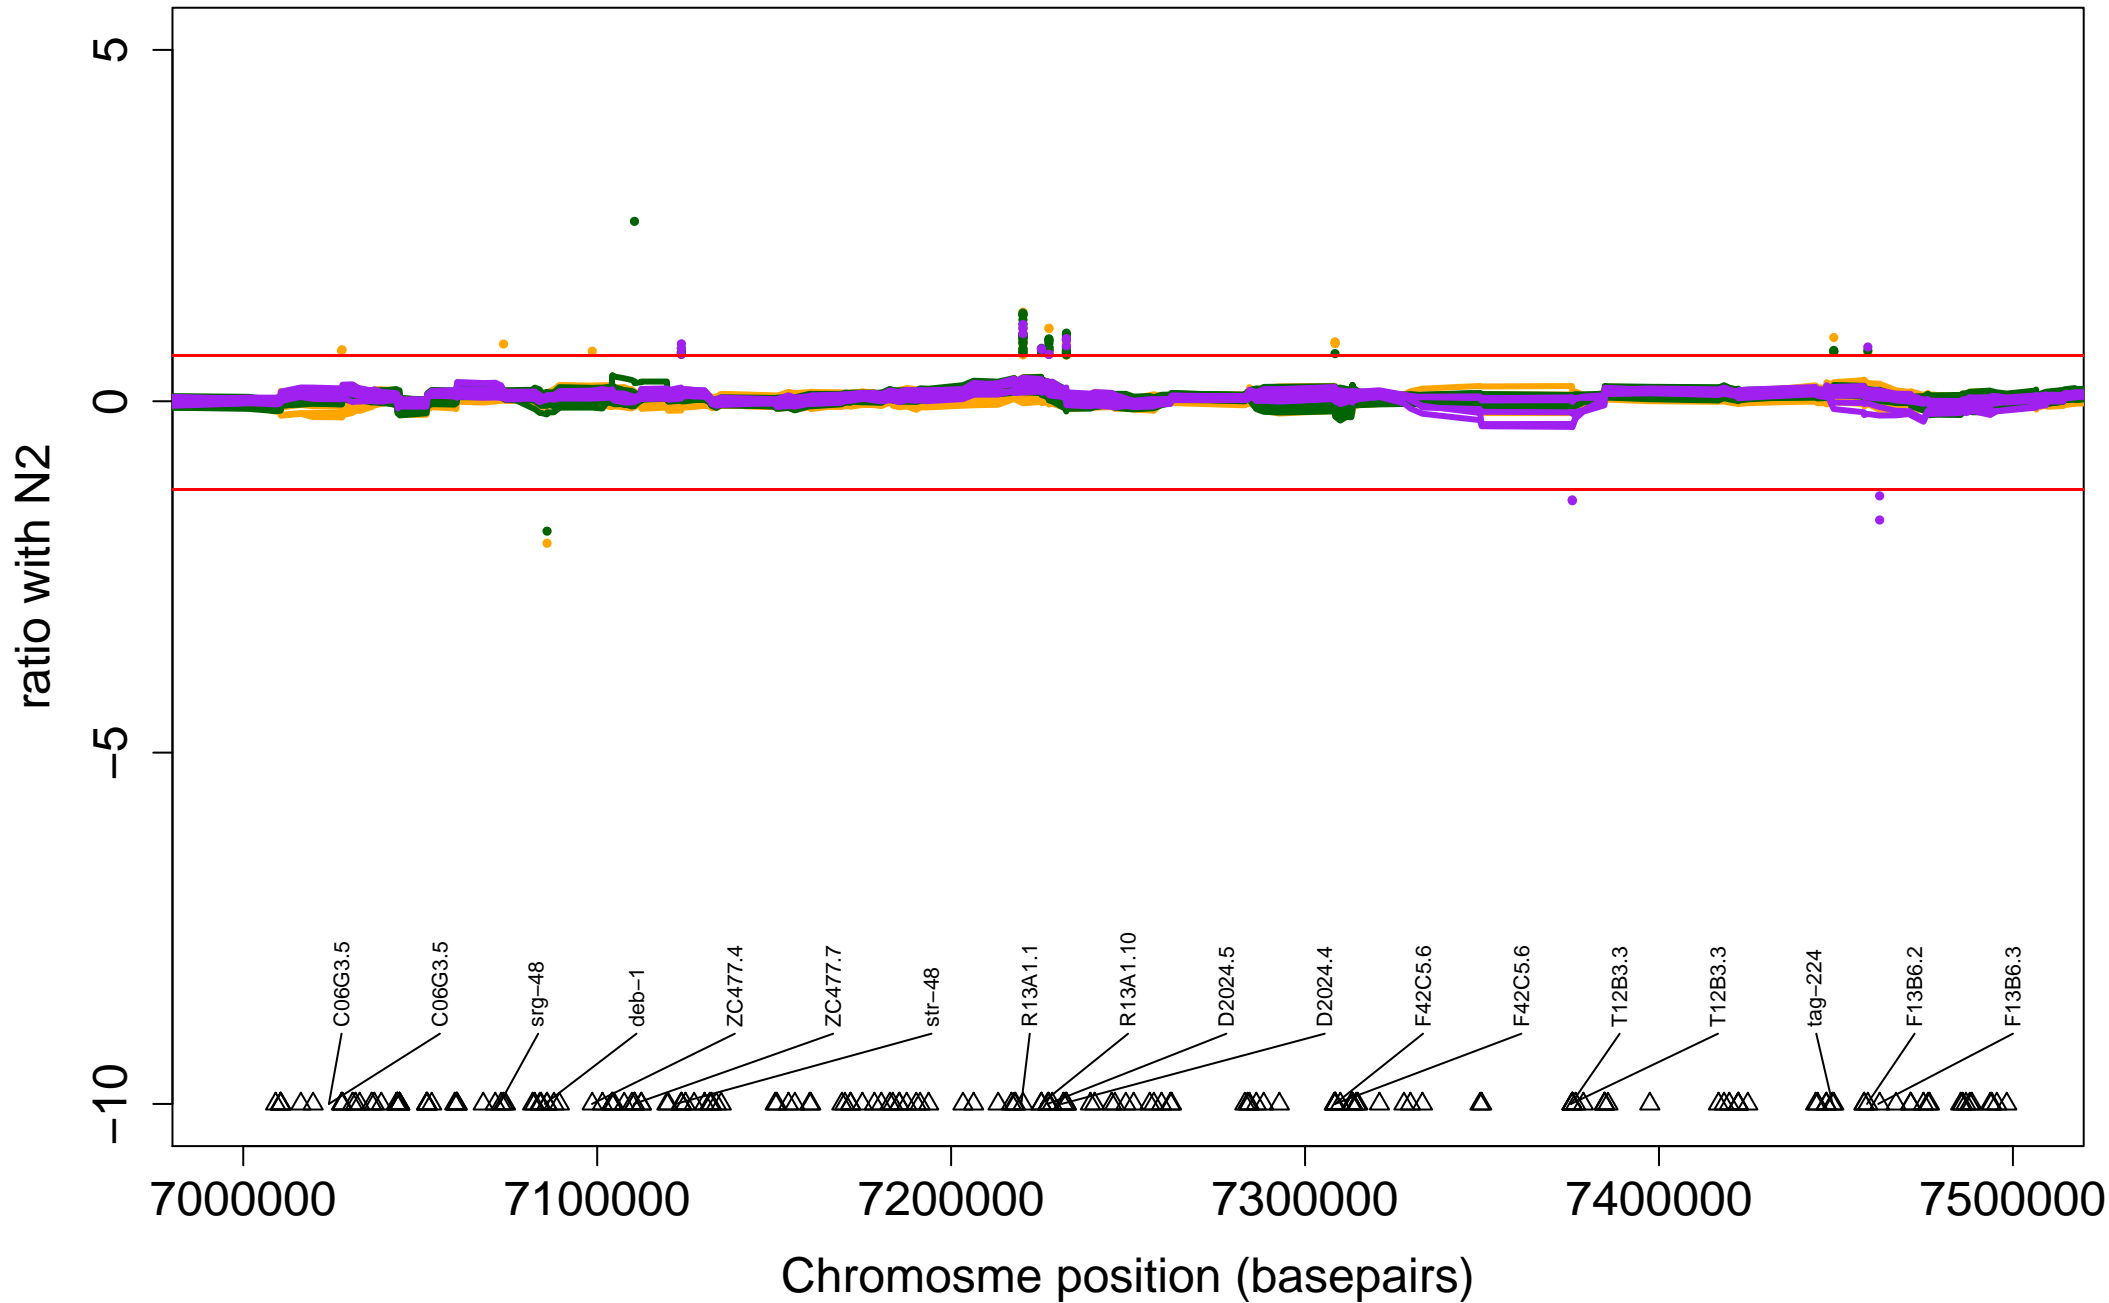

IV

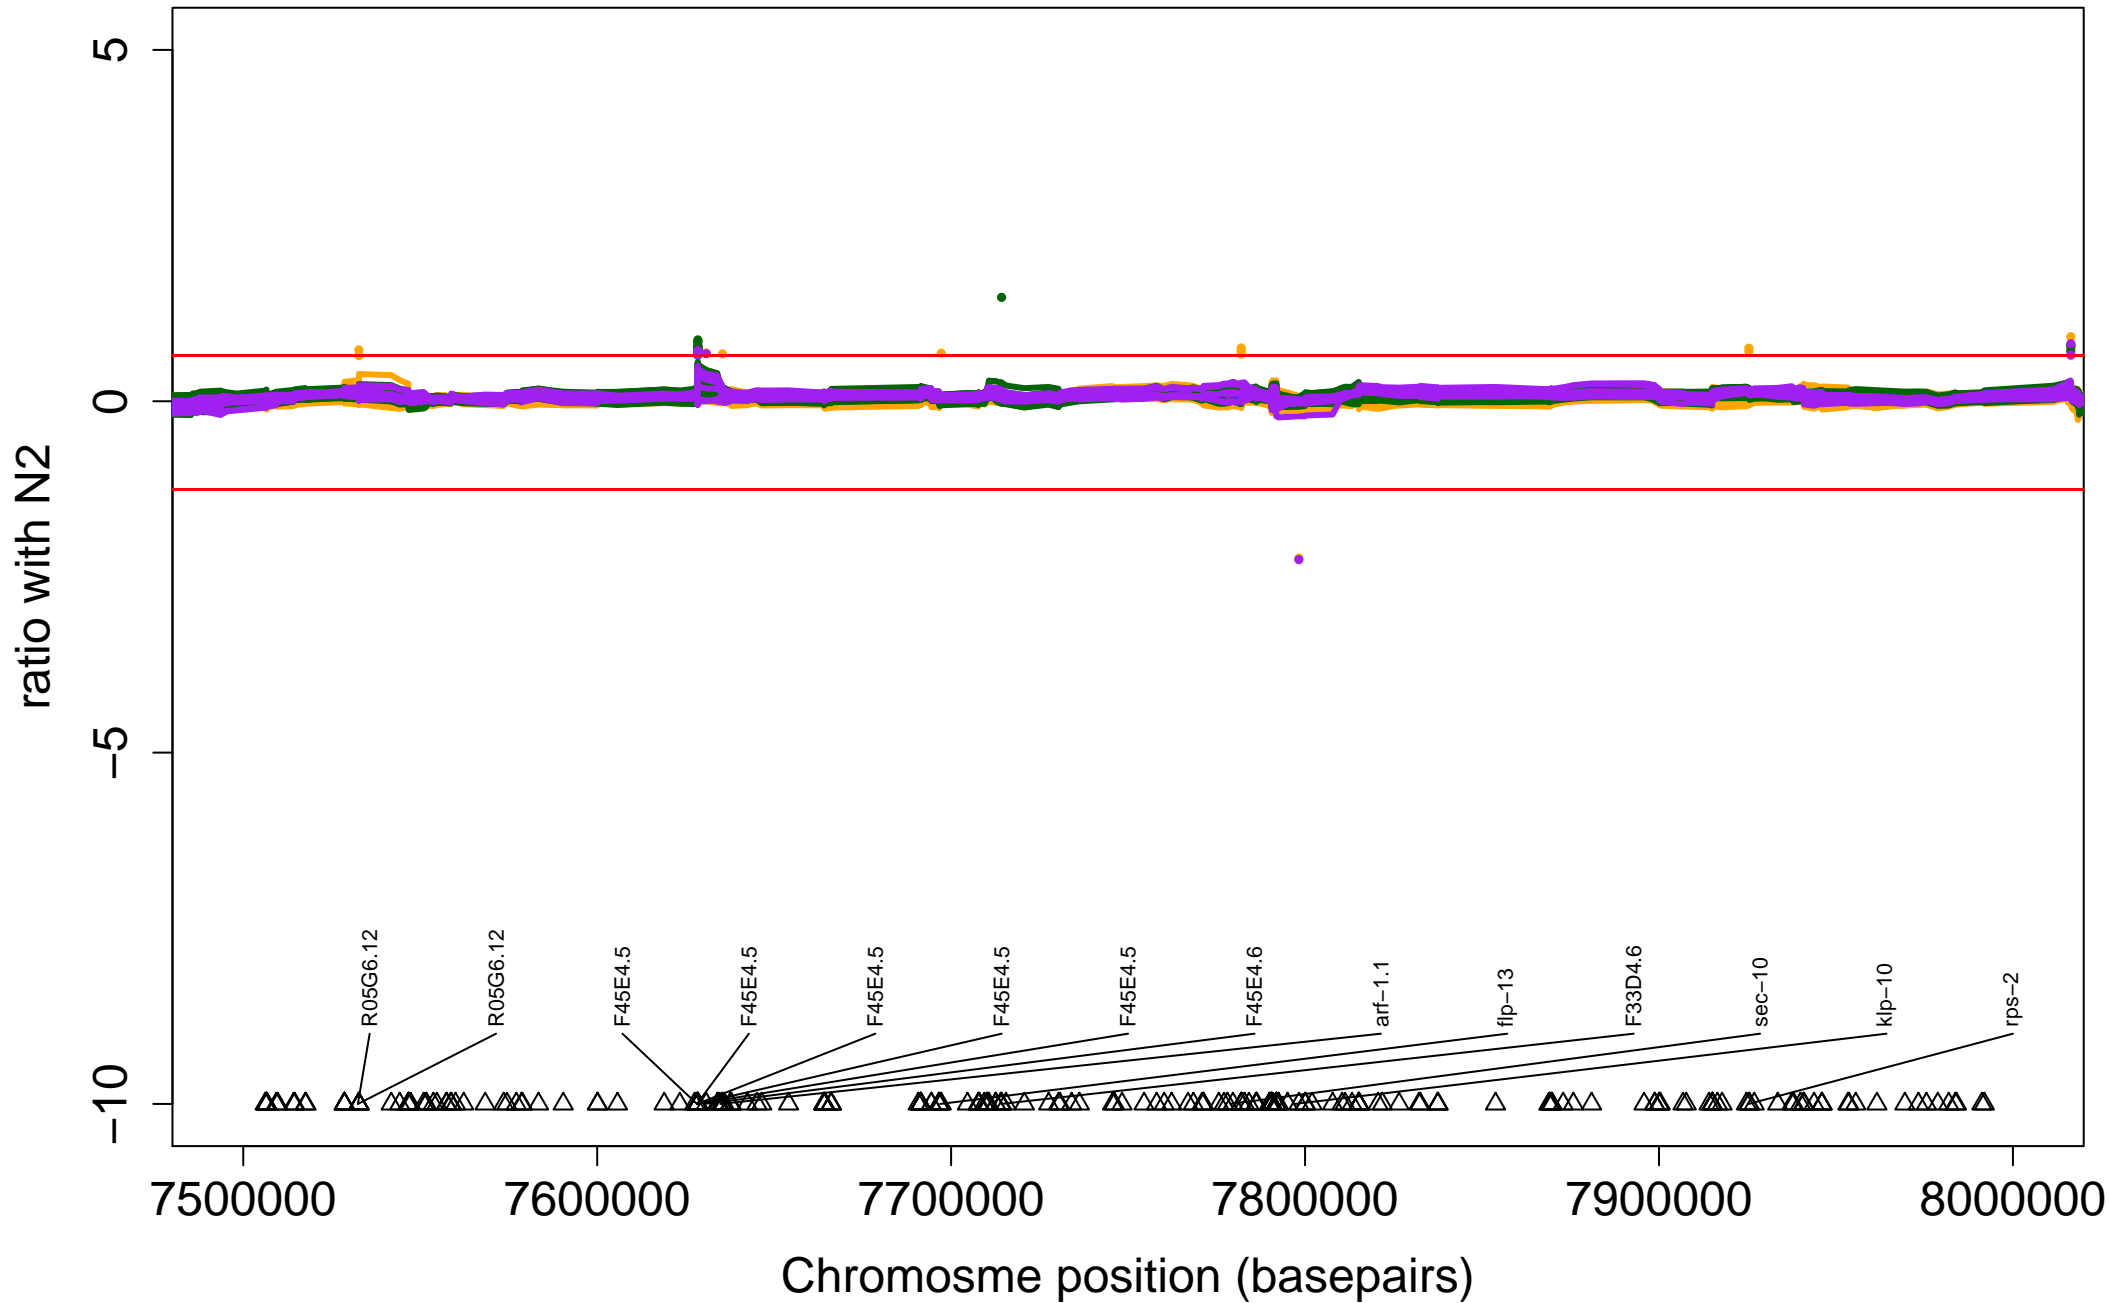

IV

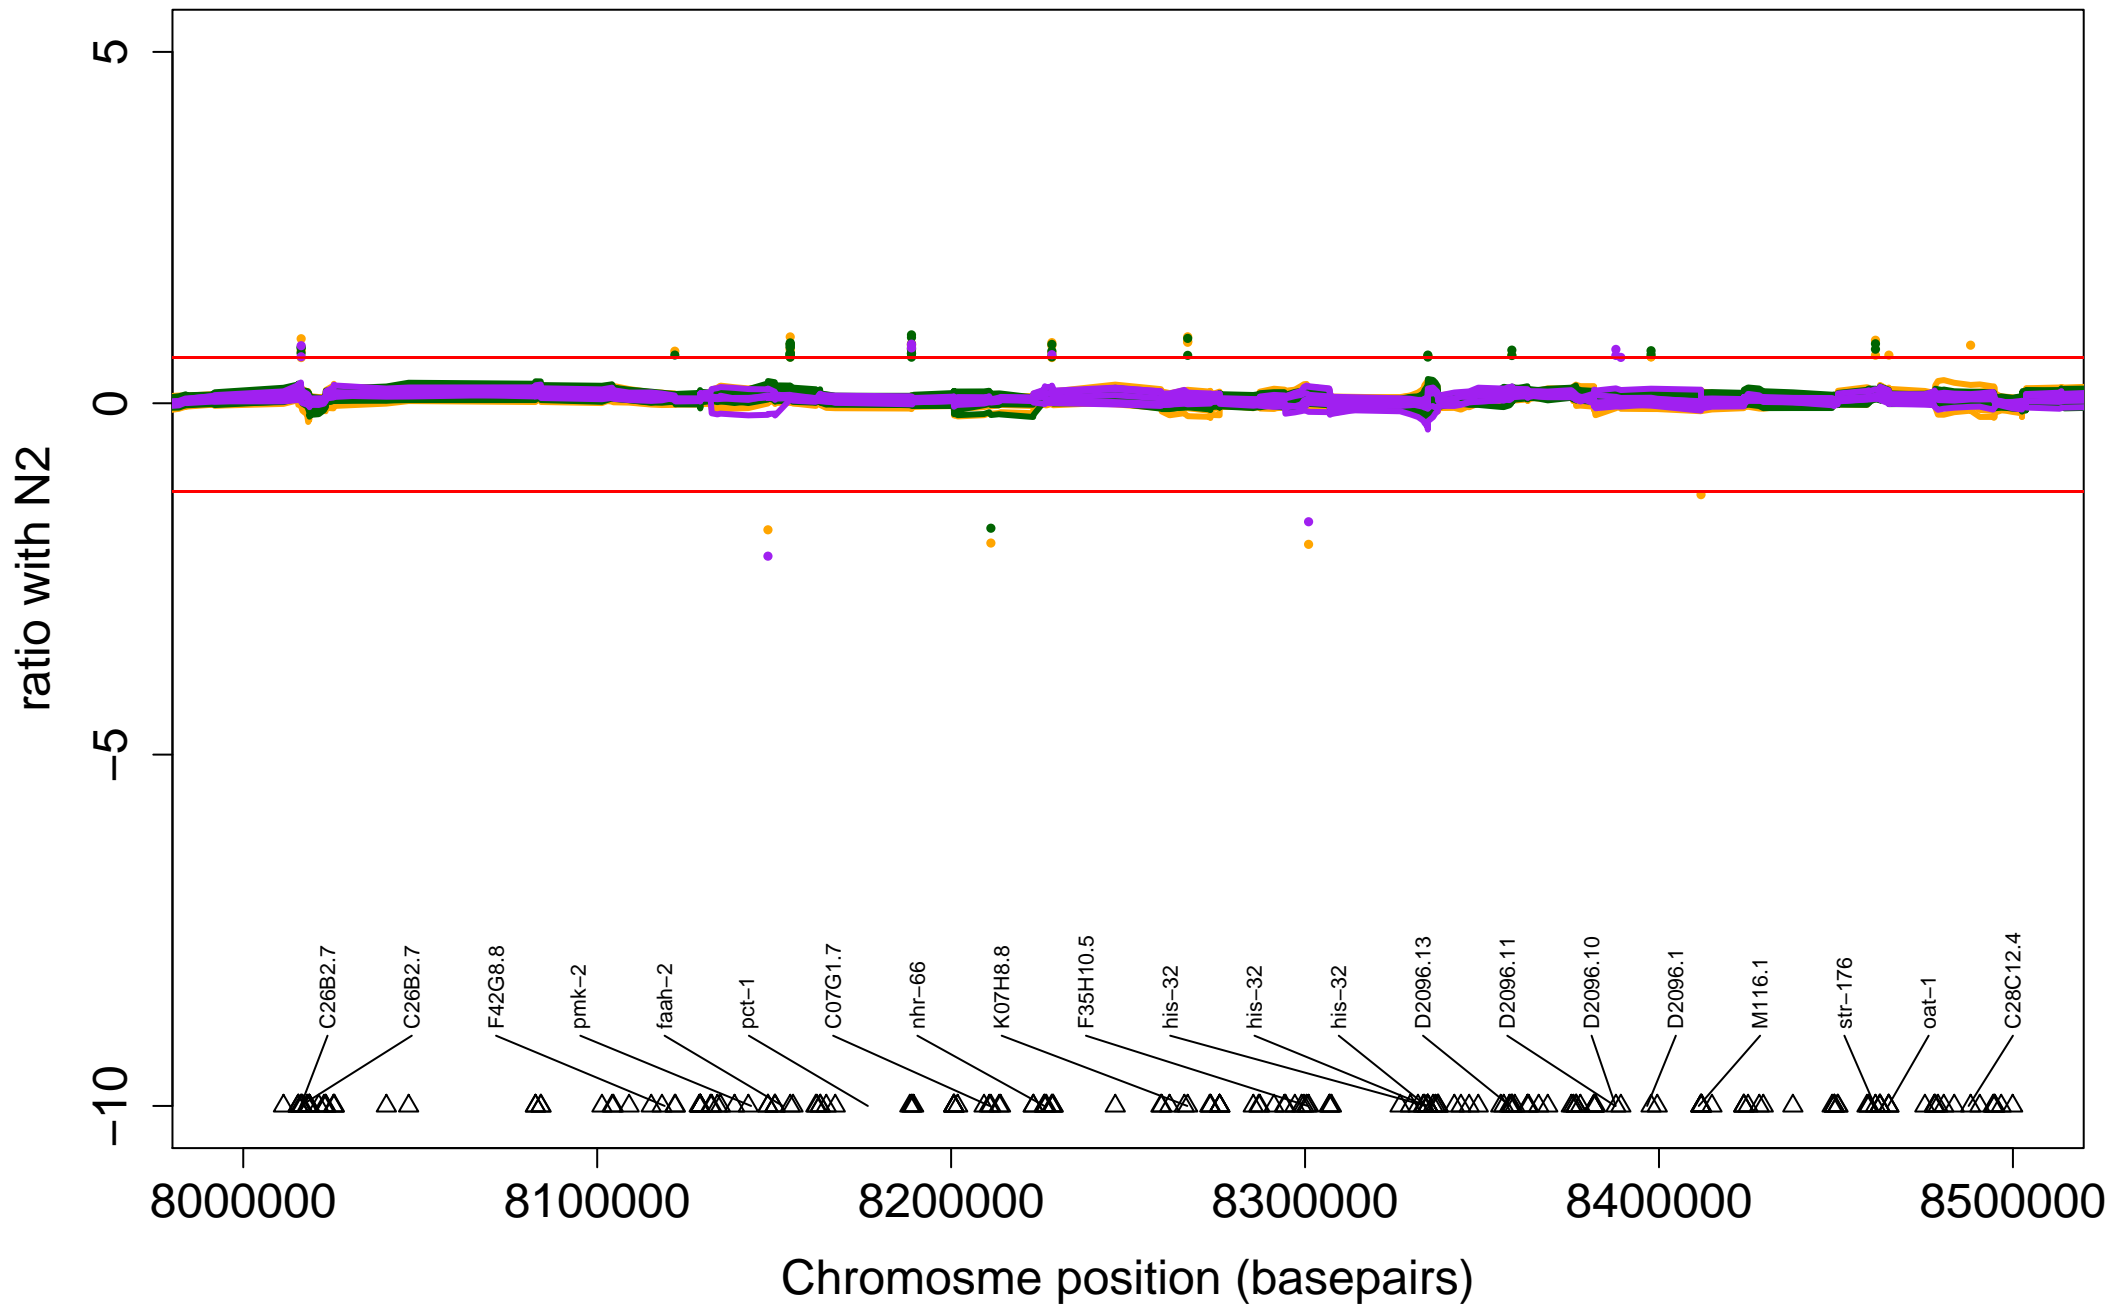

IV

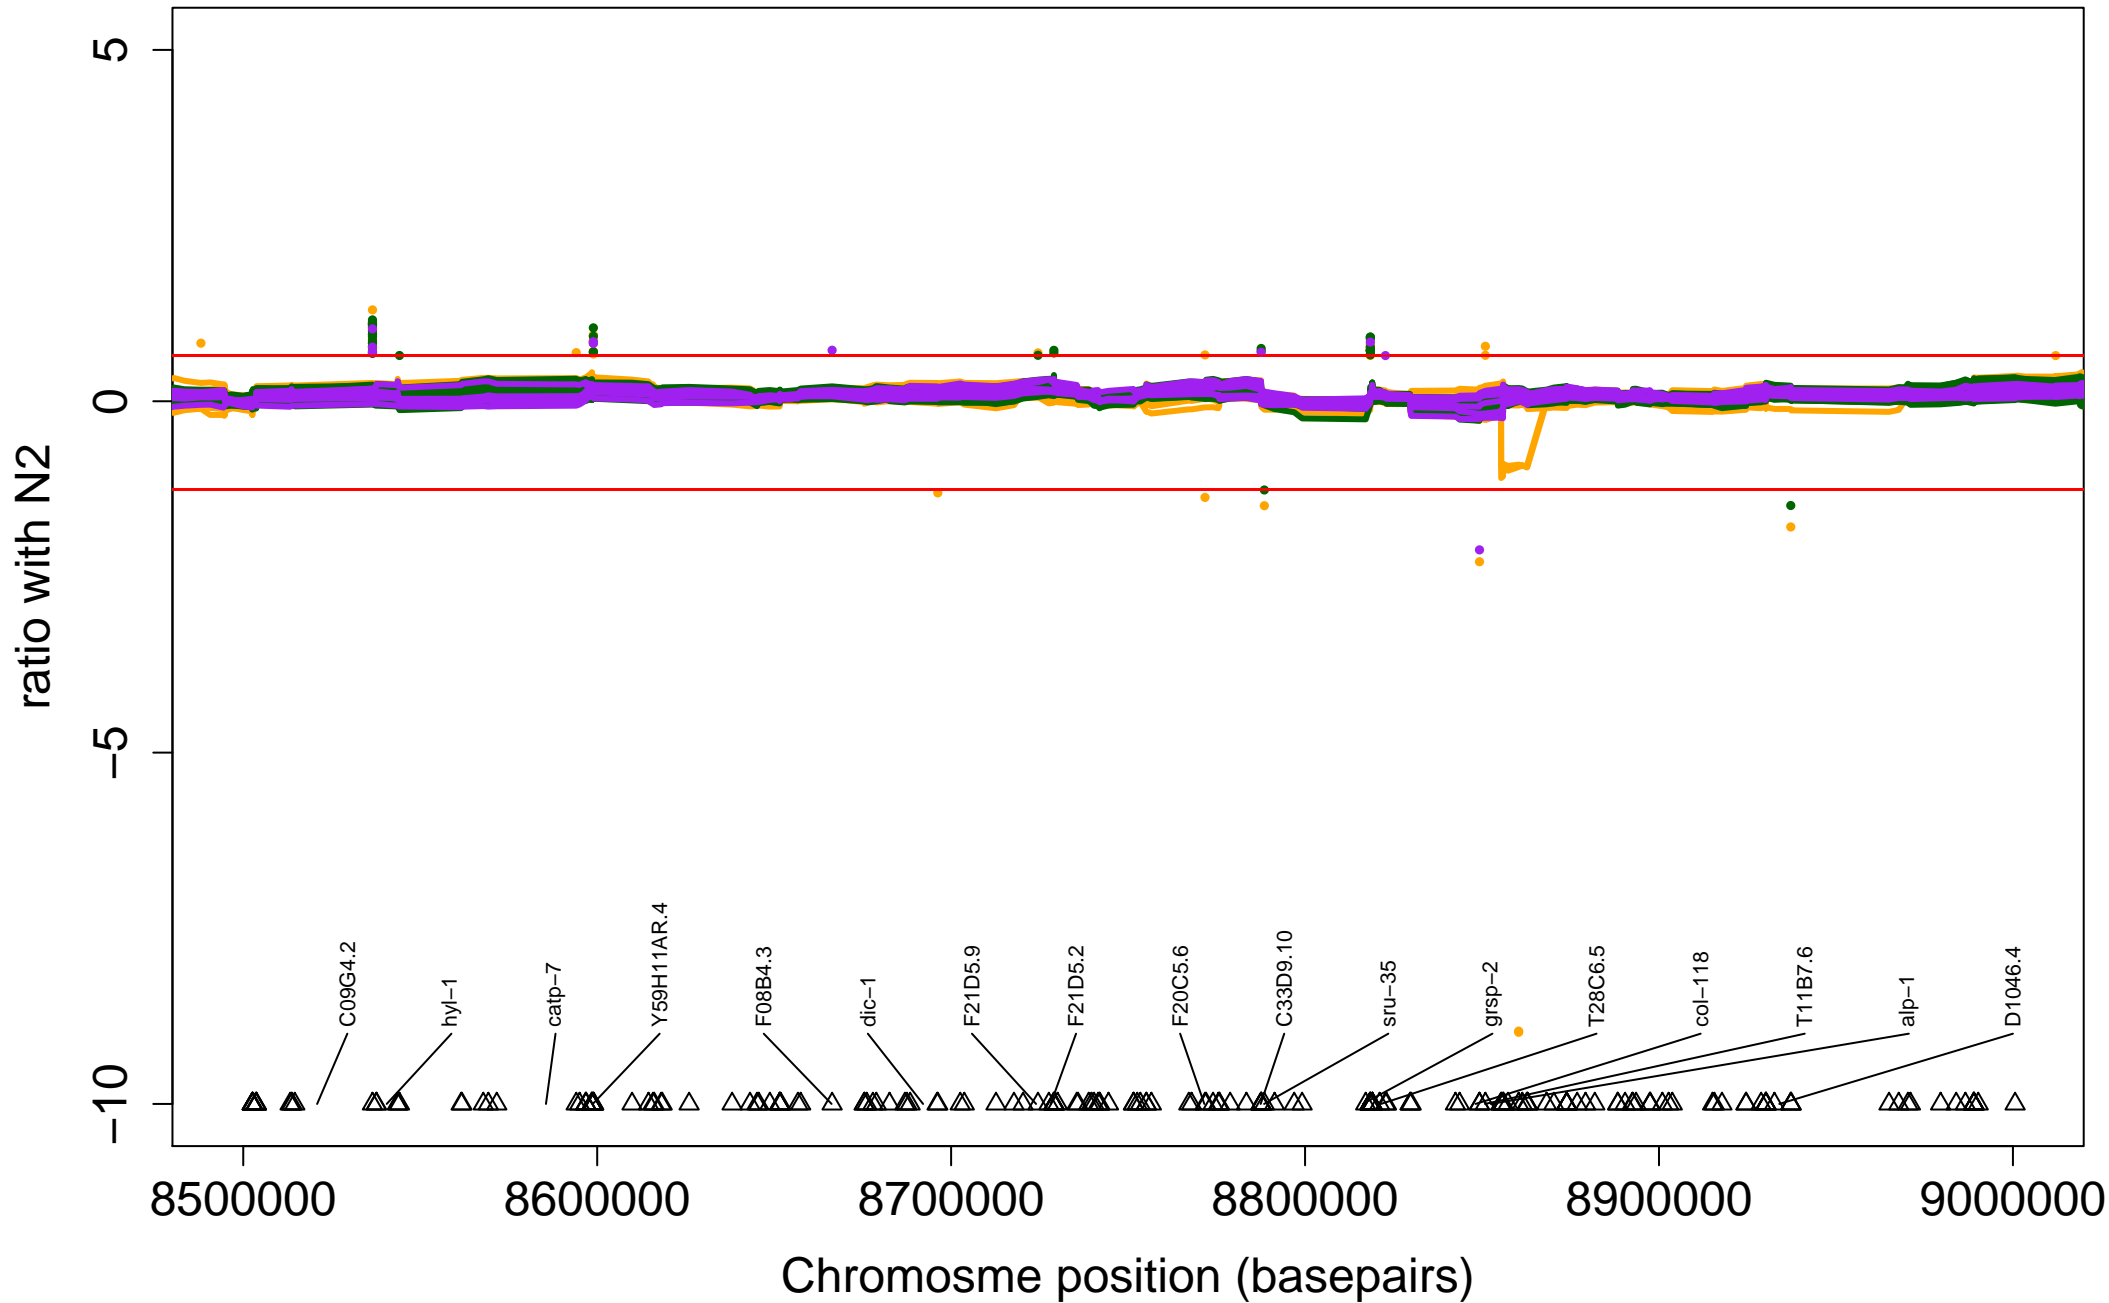

## IV

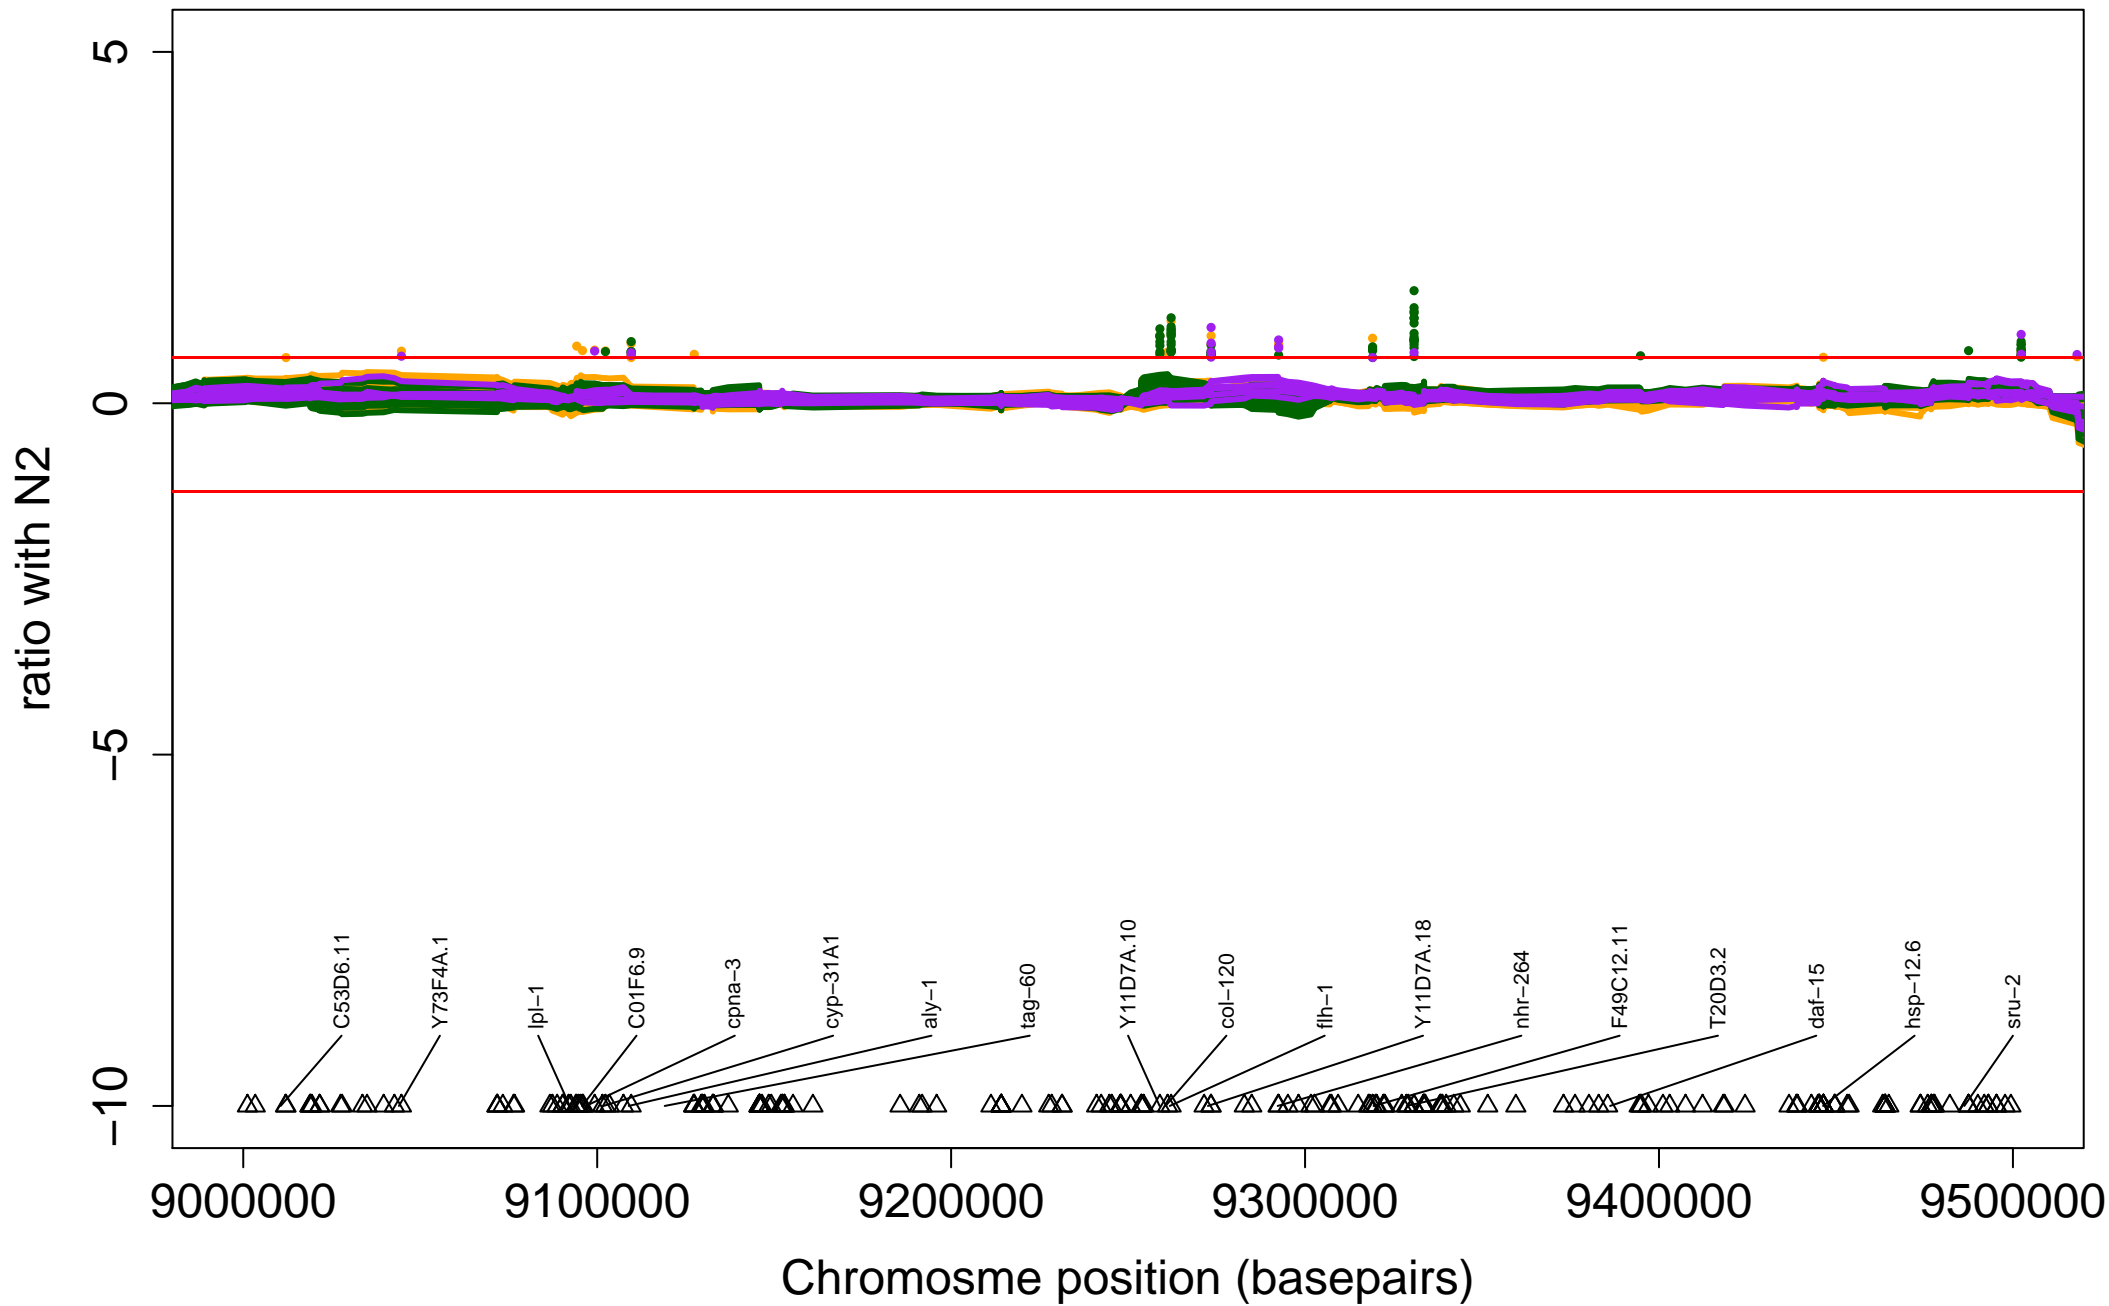

## IV

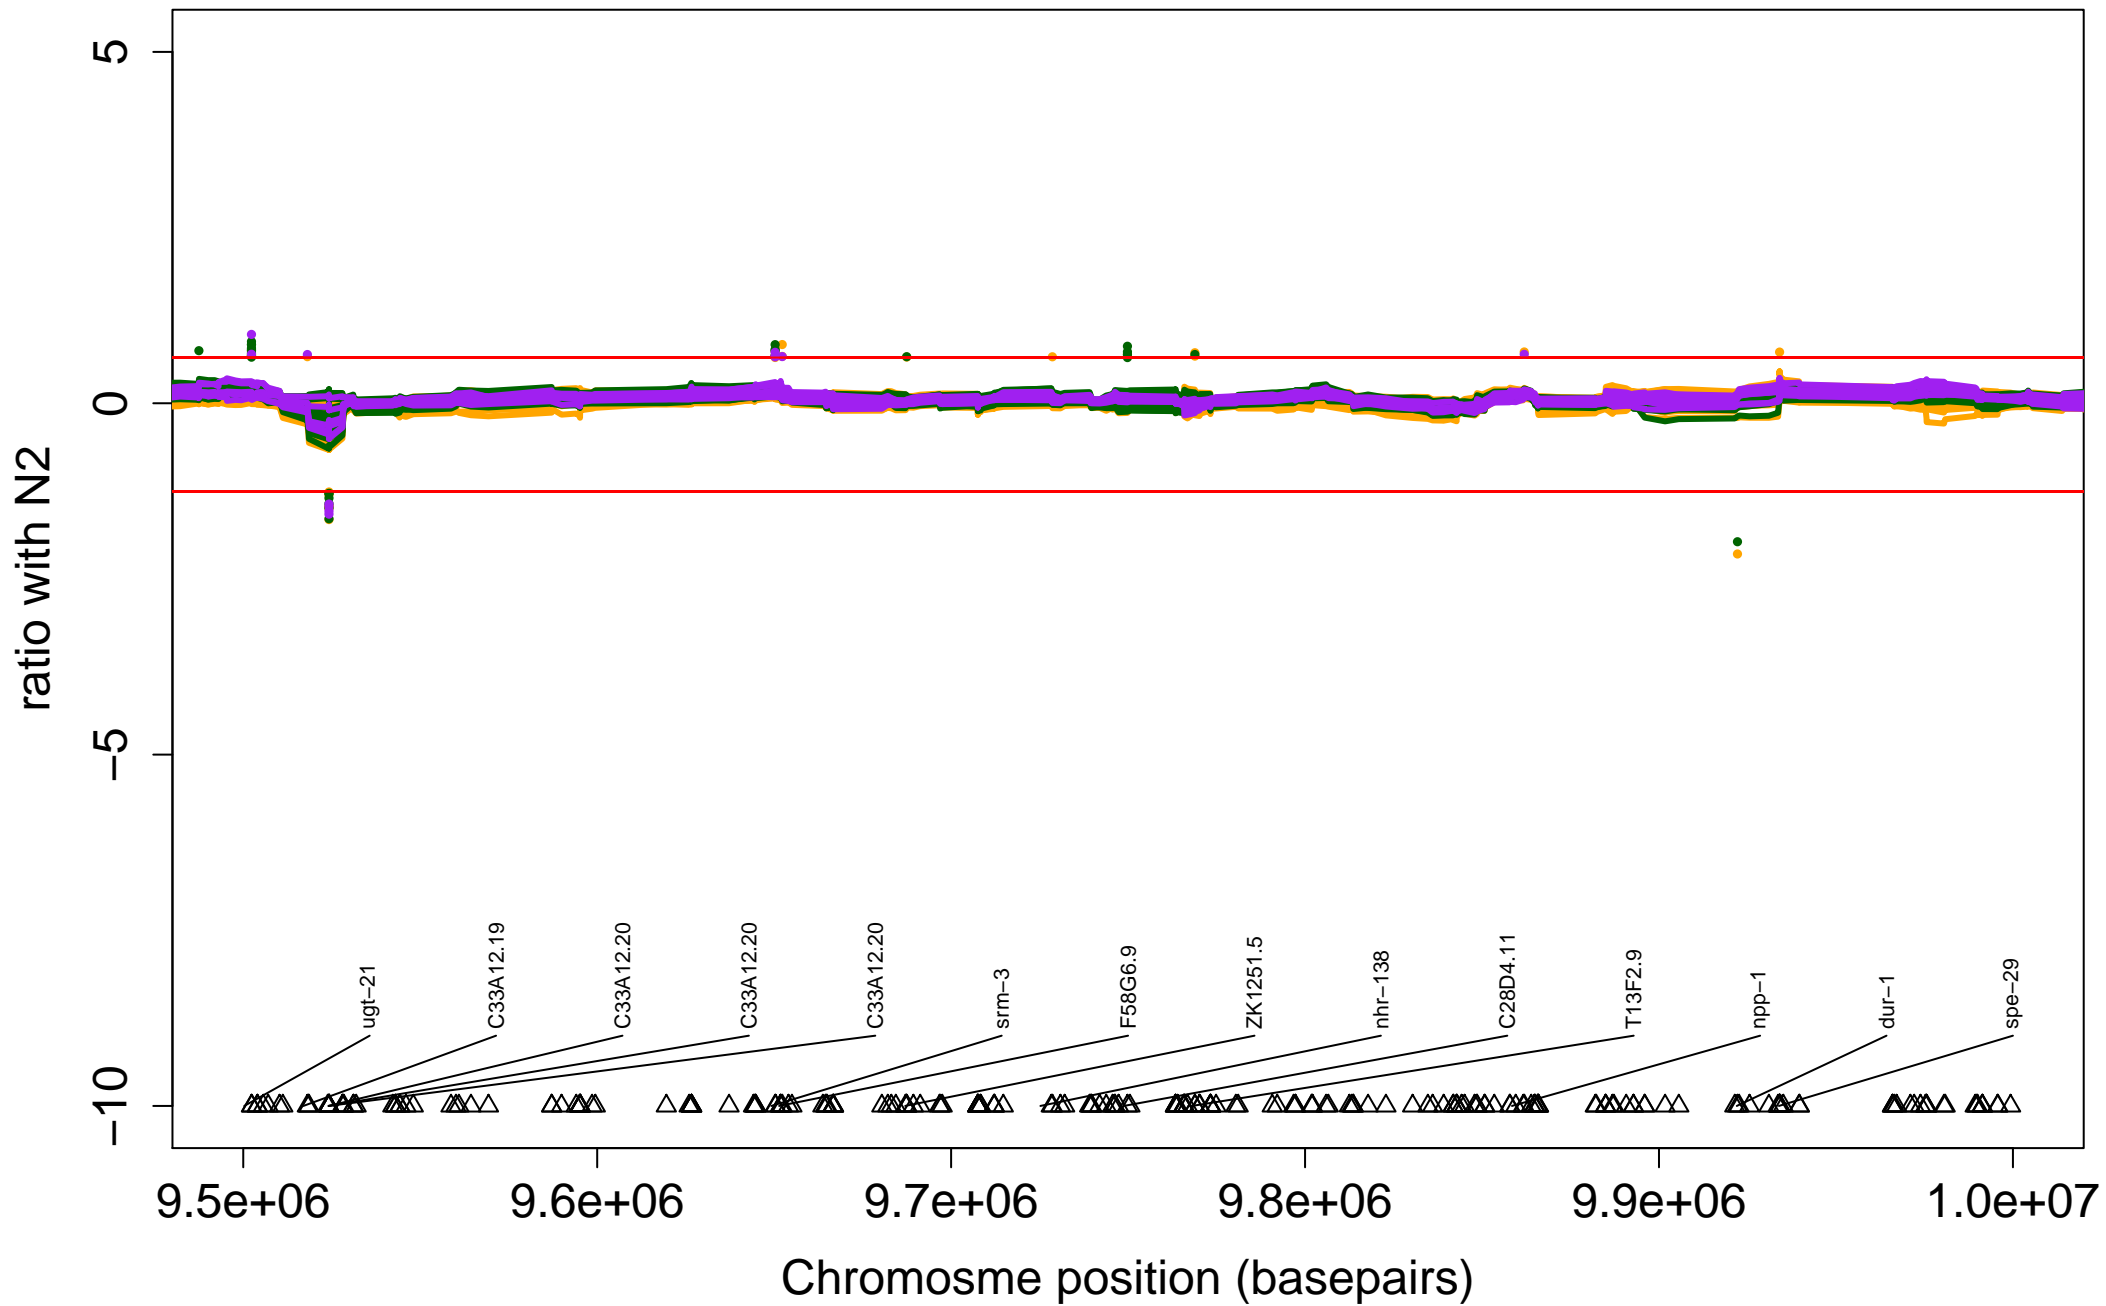



## IV

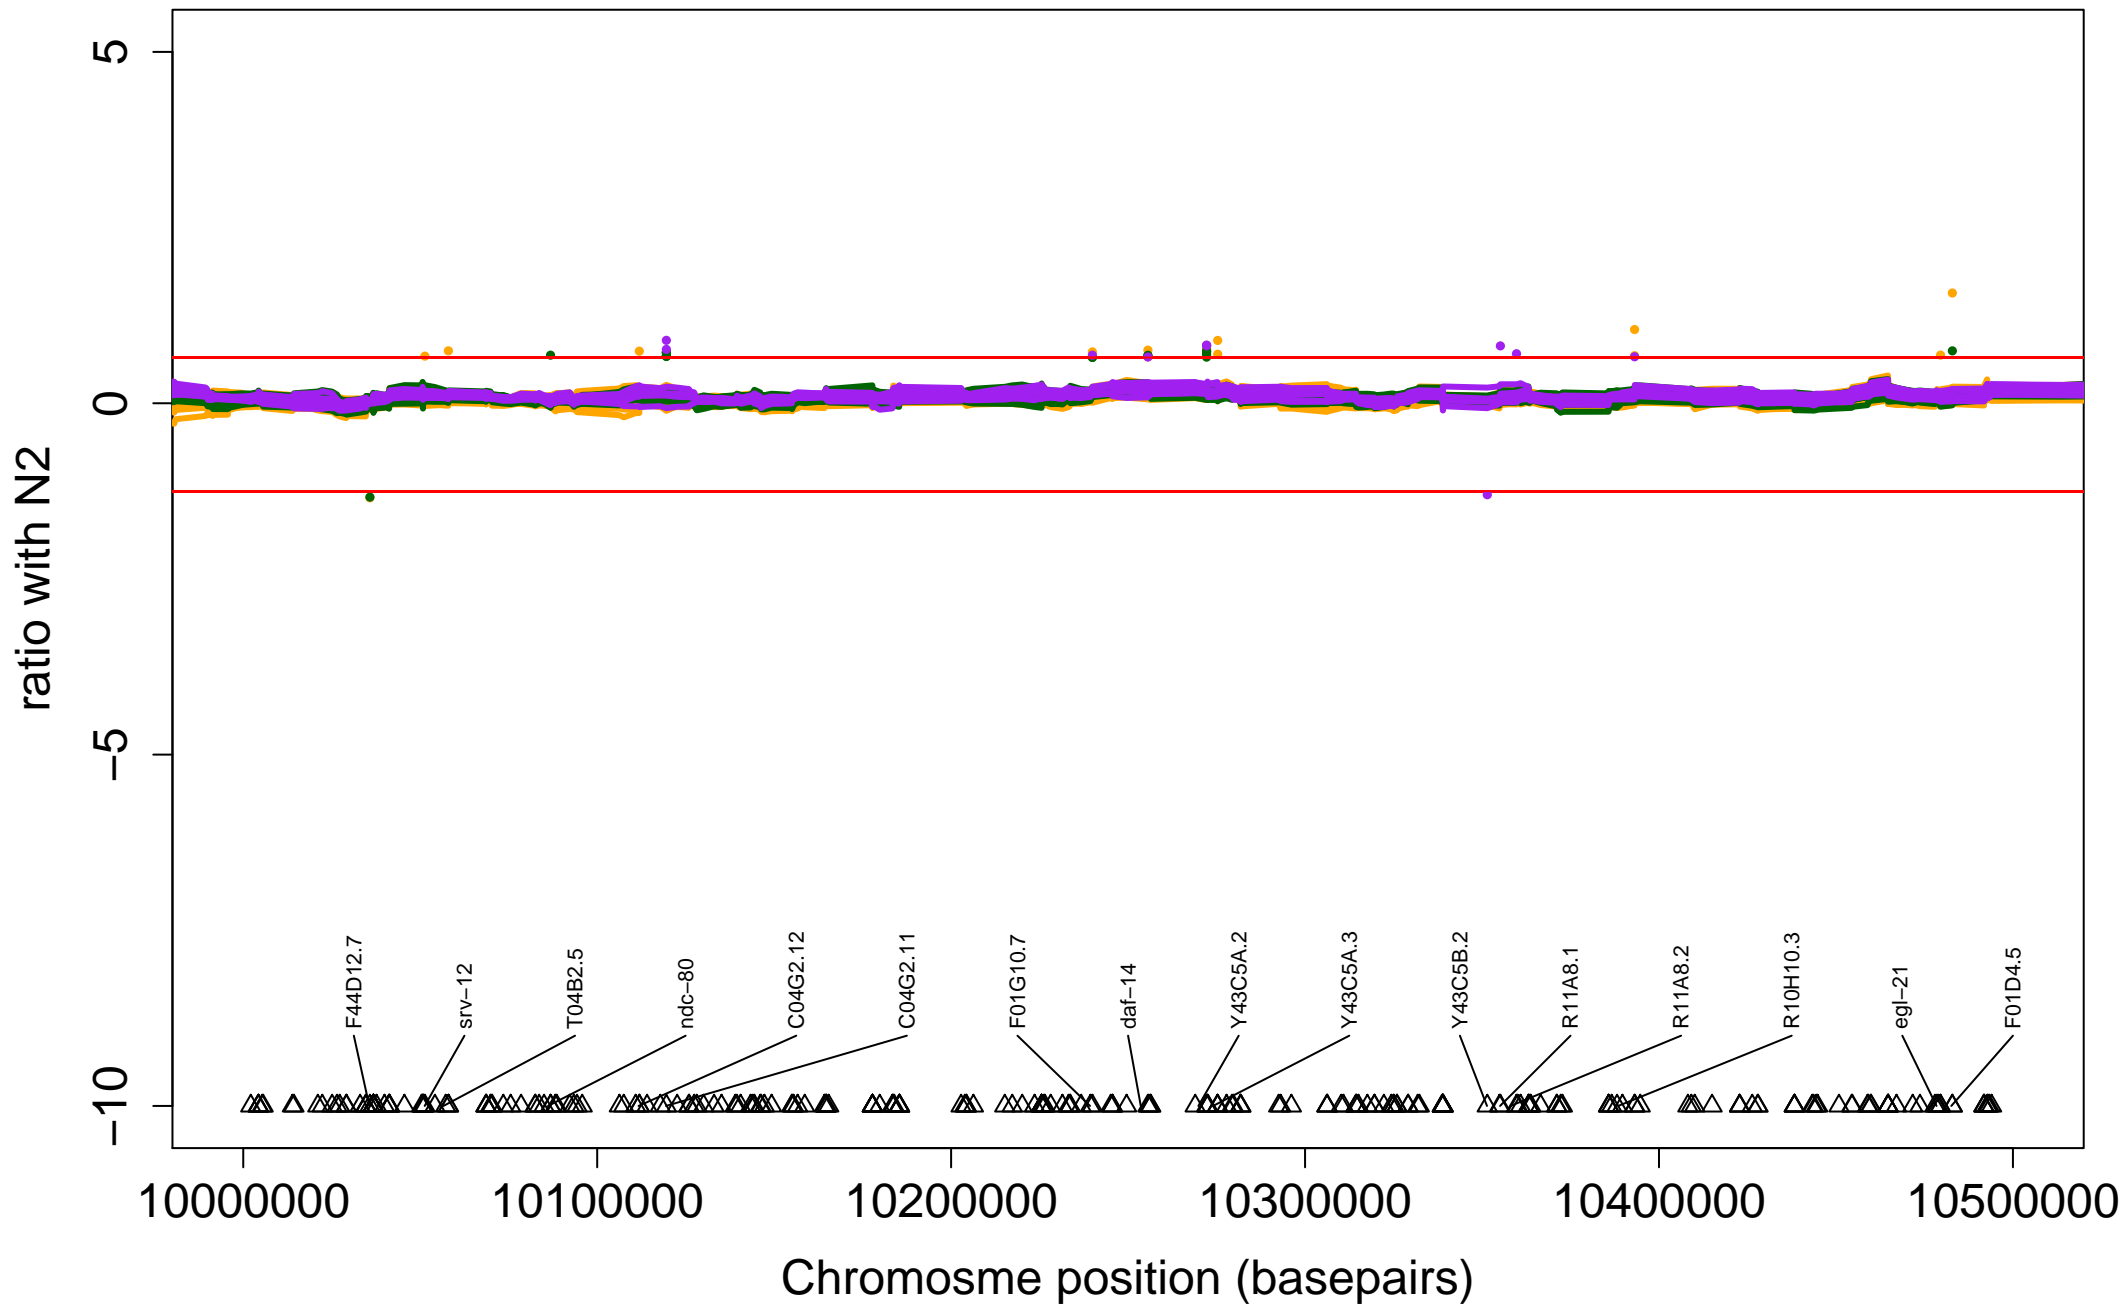

IV

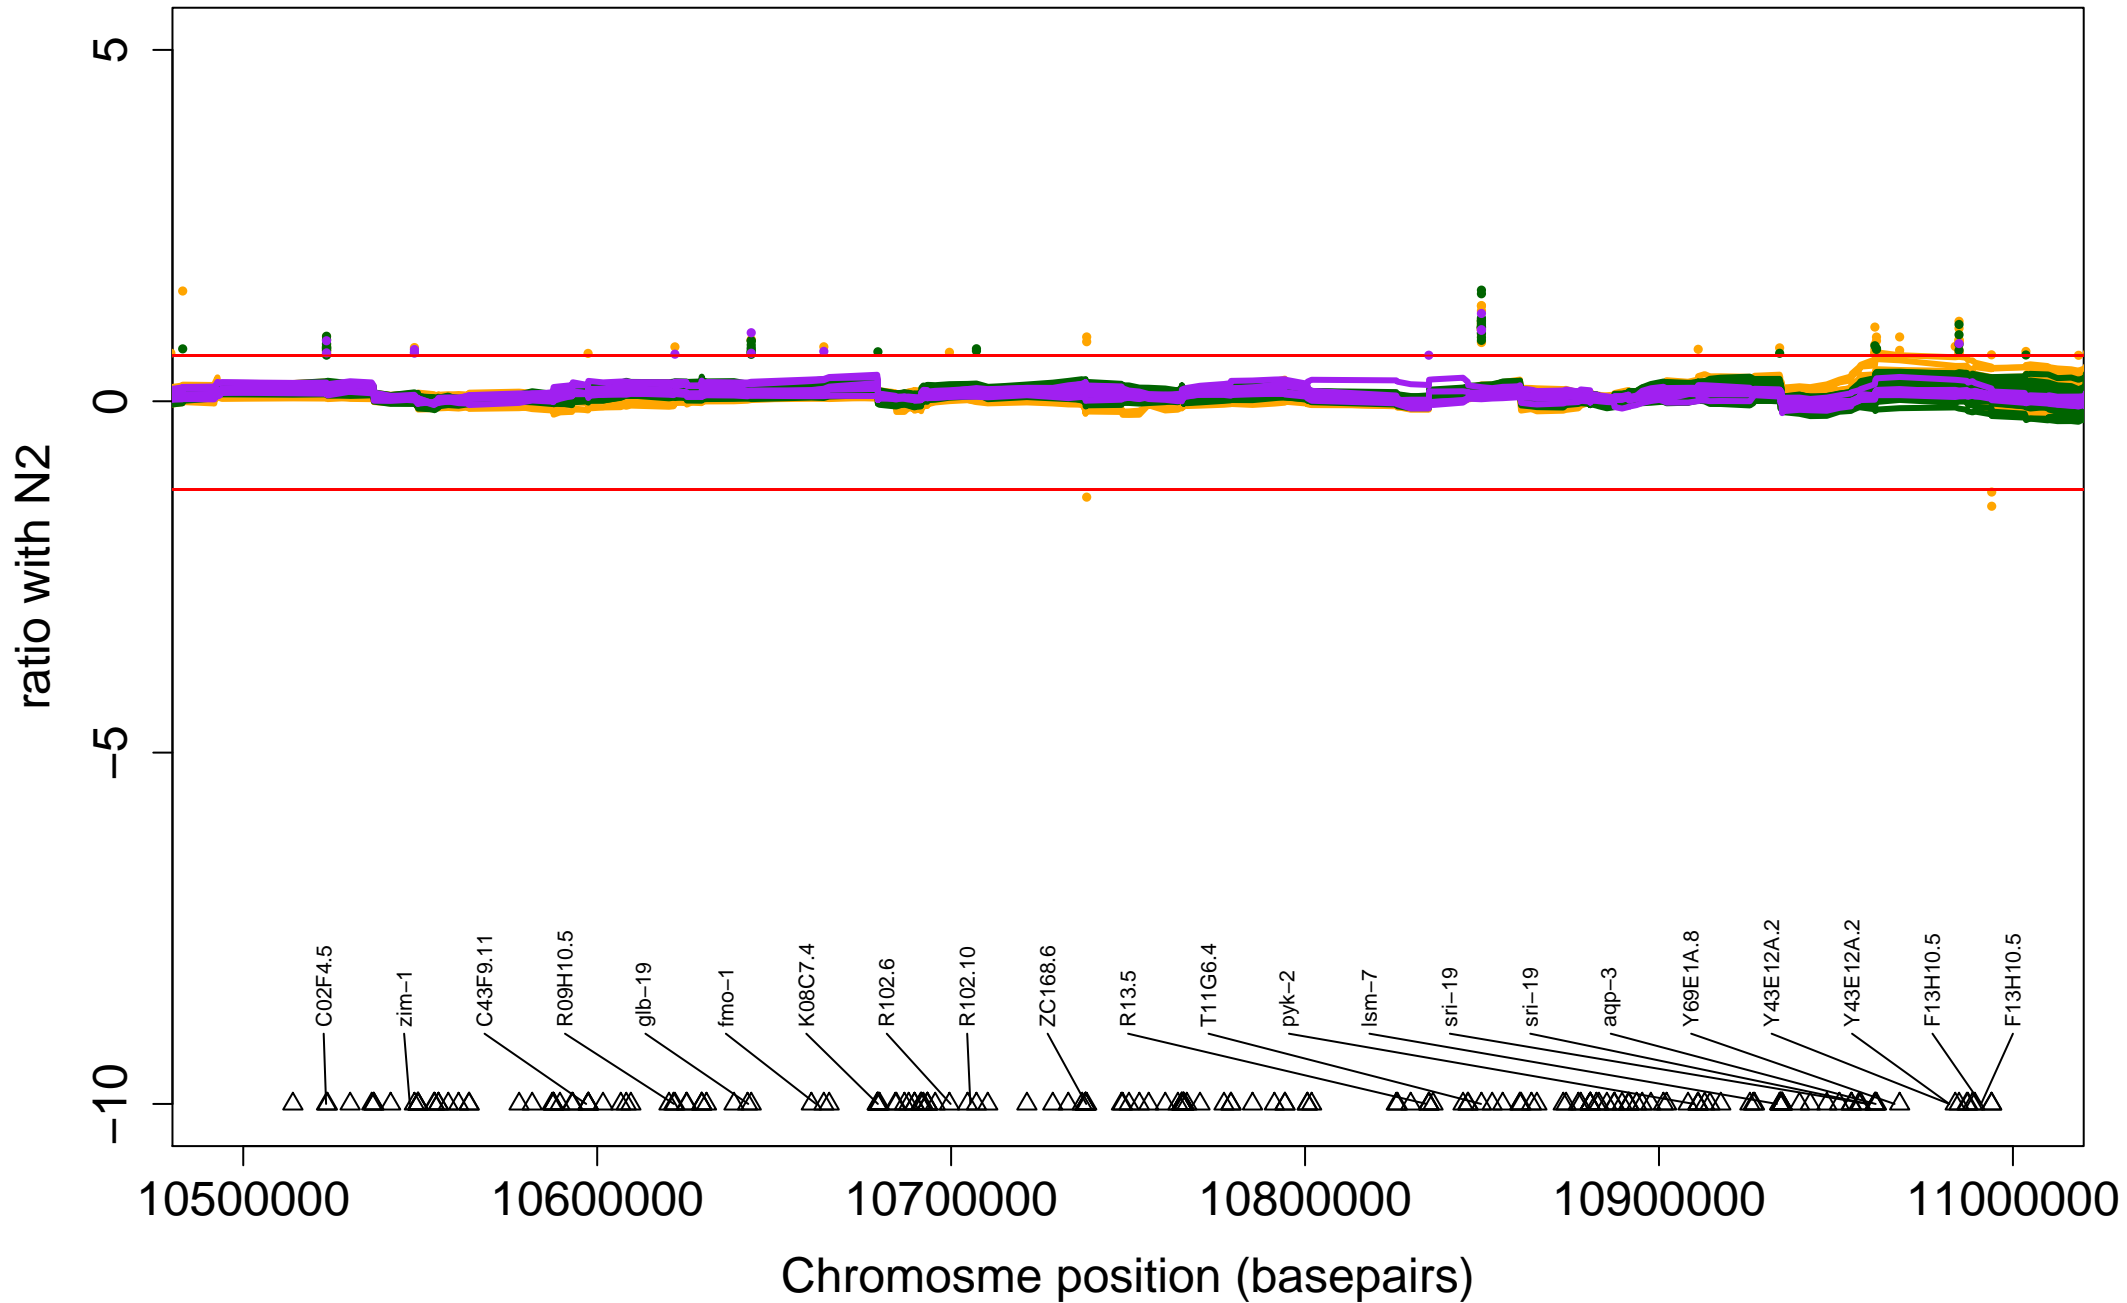

IV

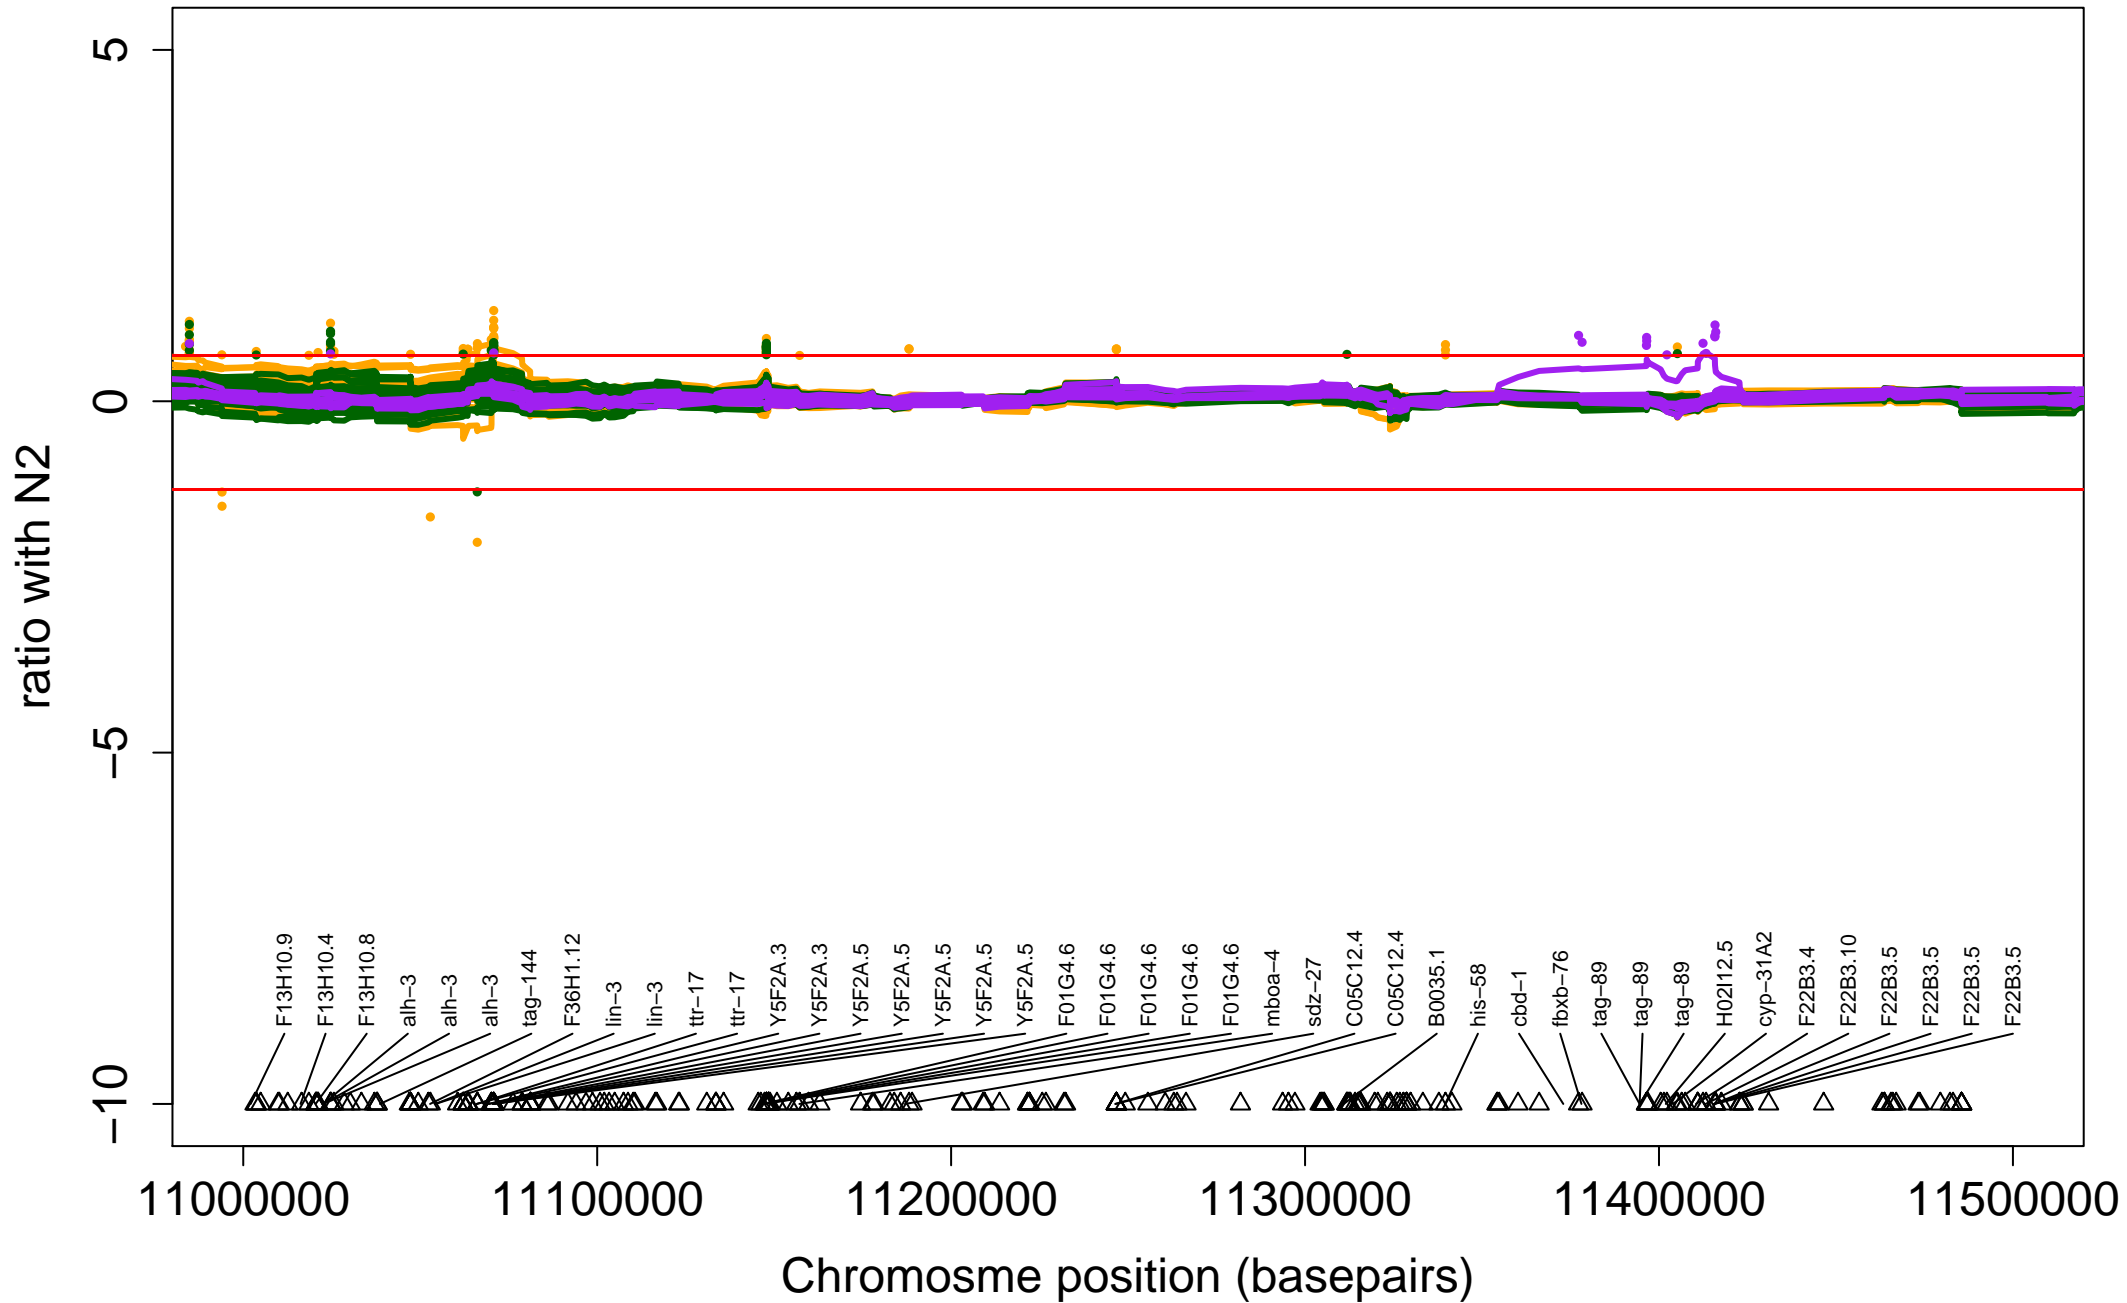

## IV

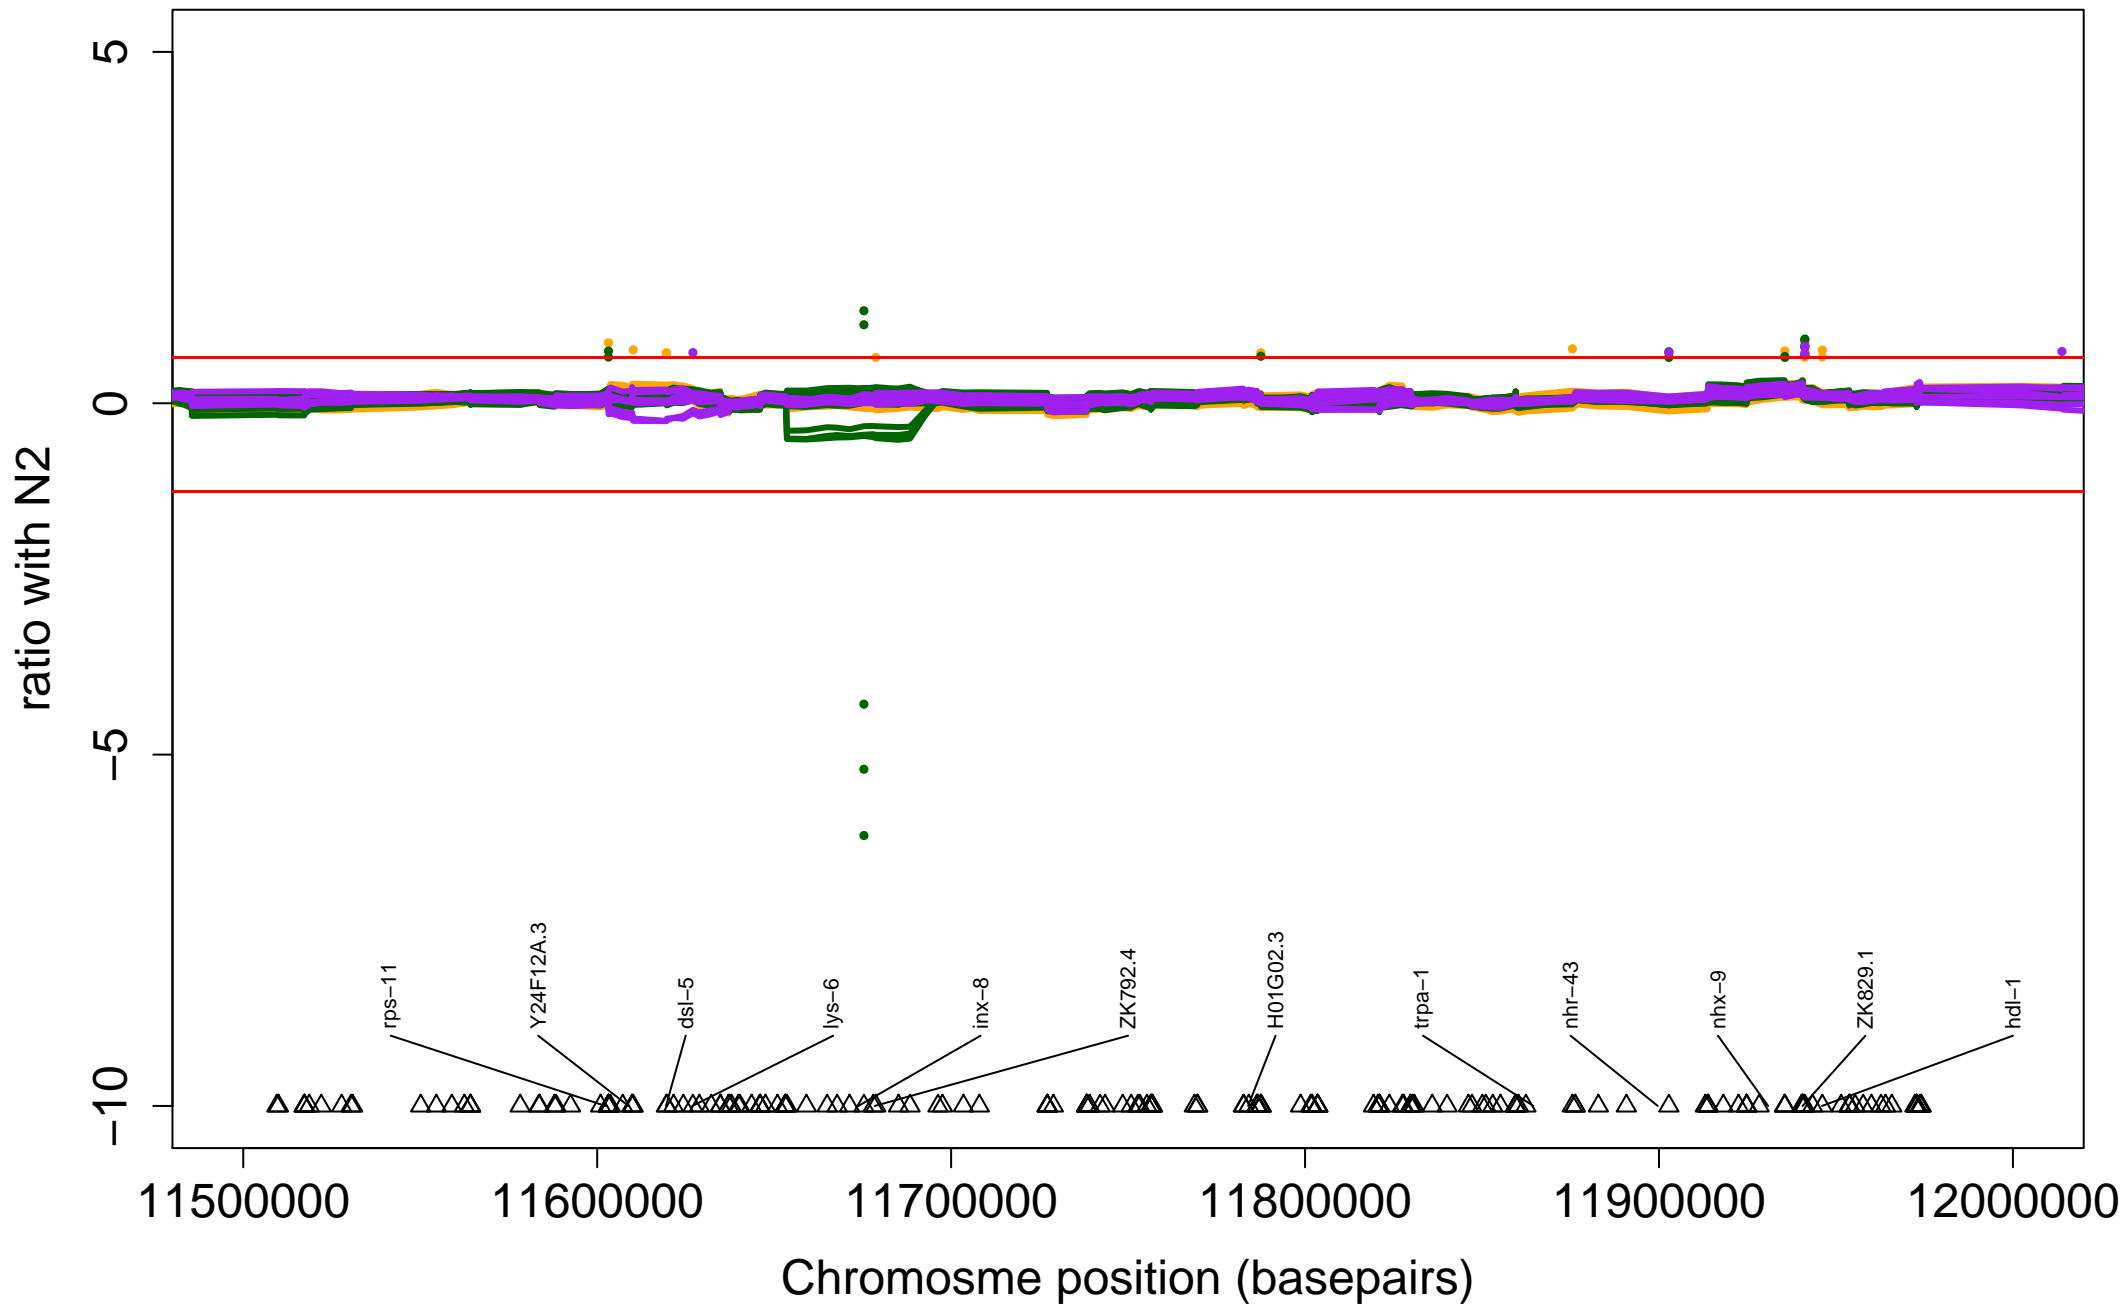

IV

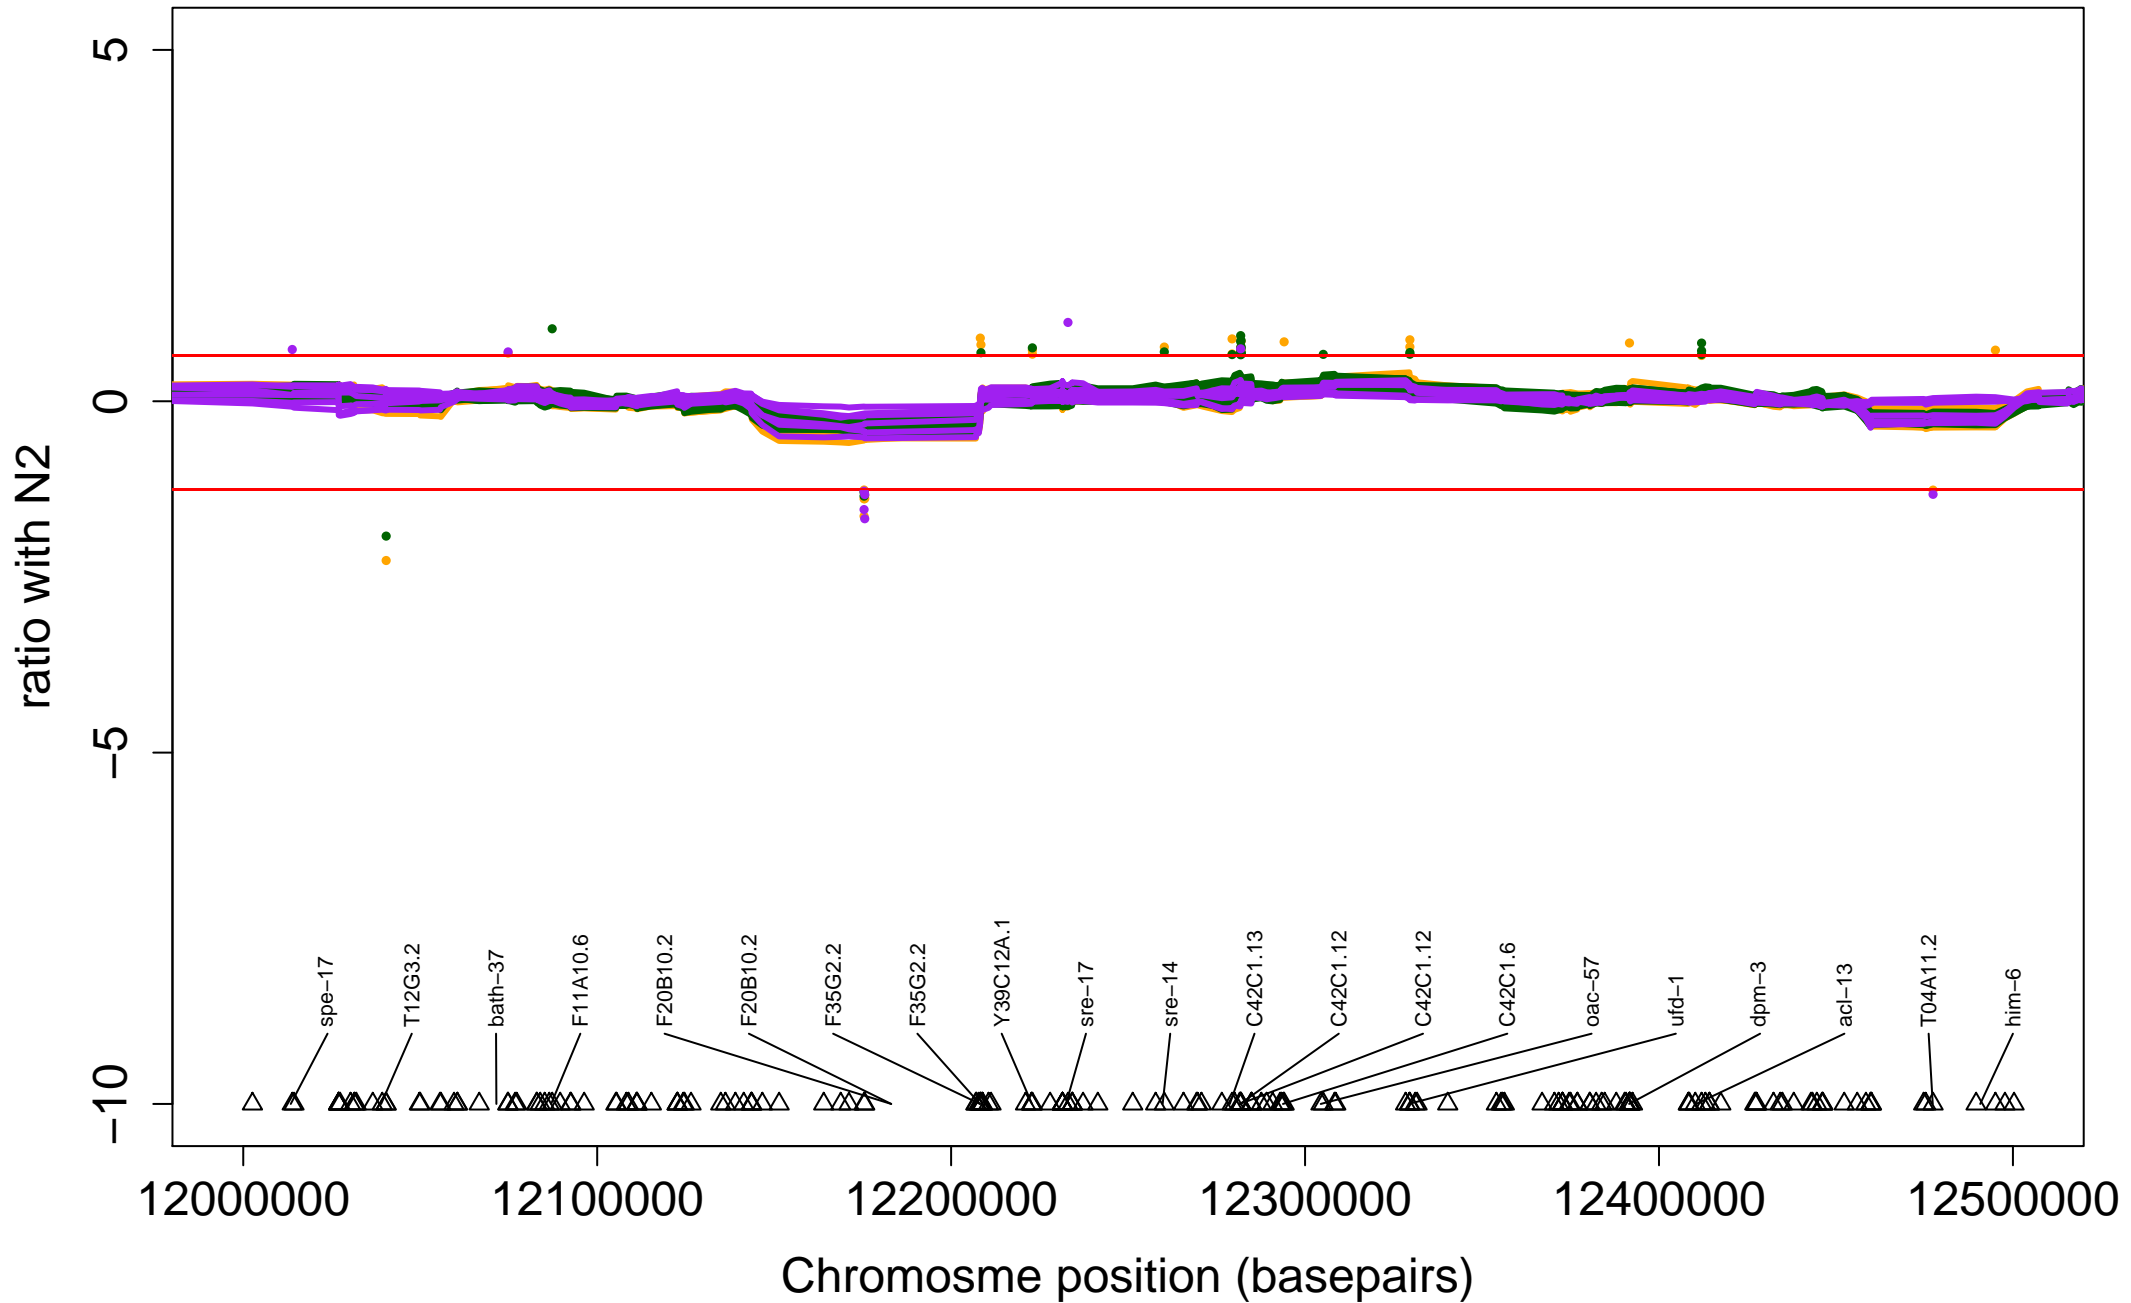

IV

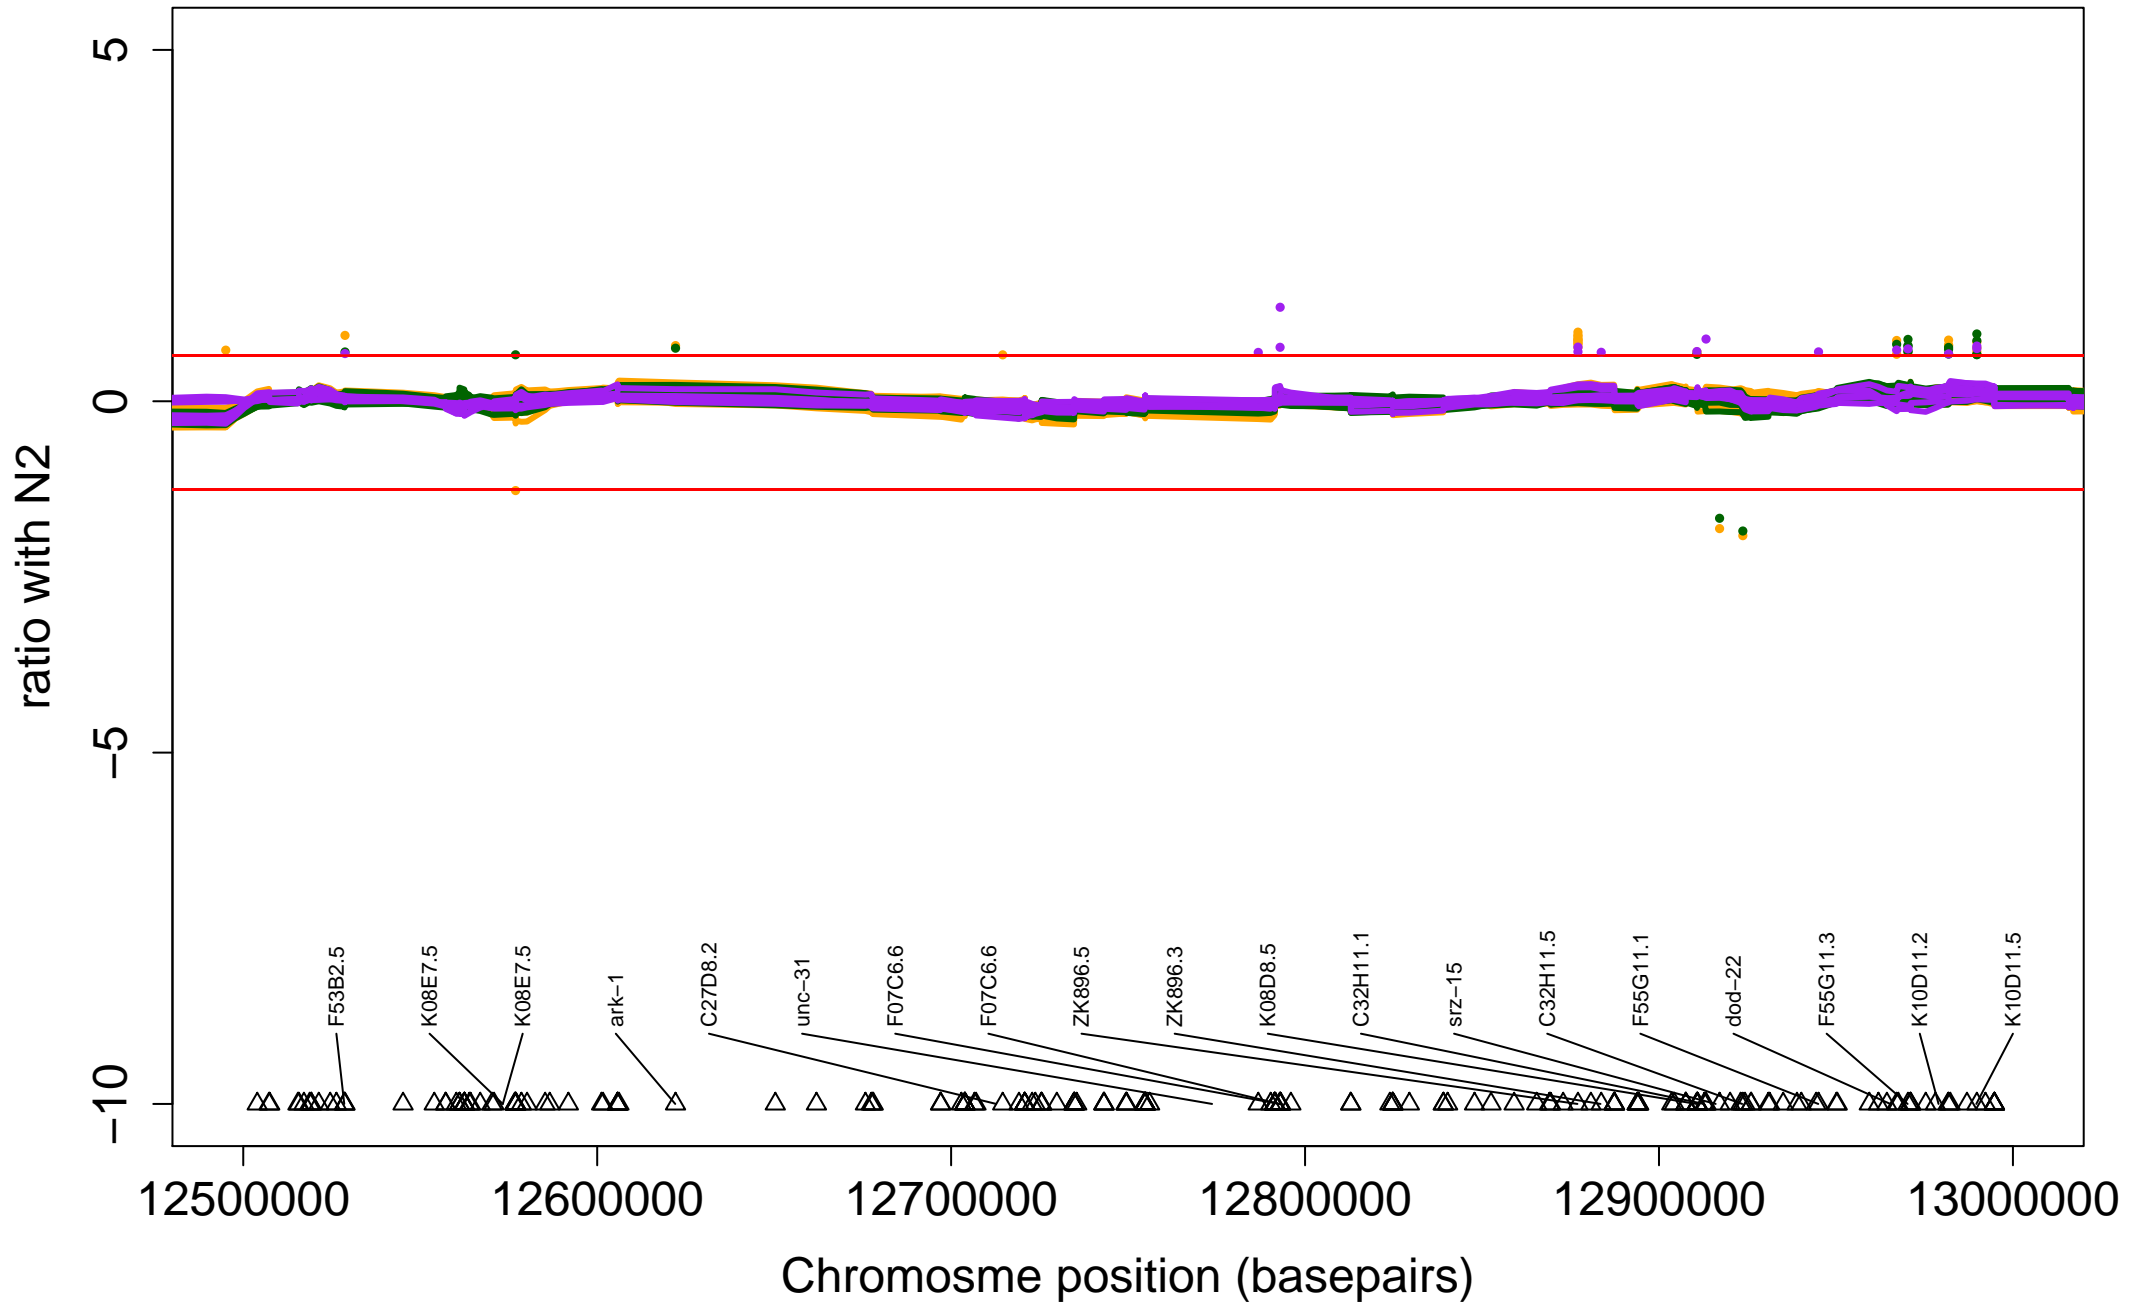

IV

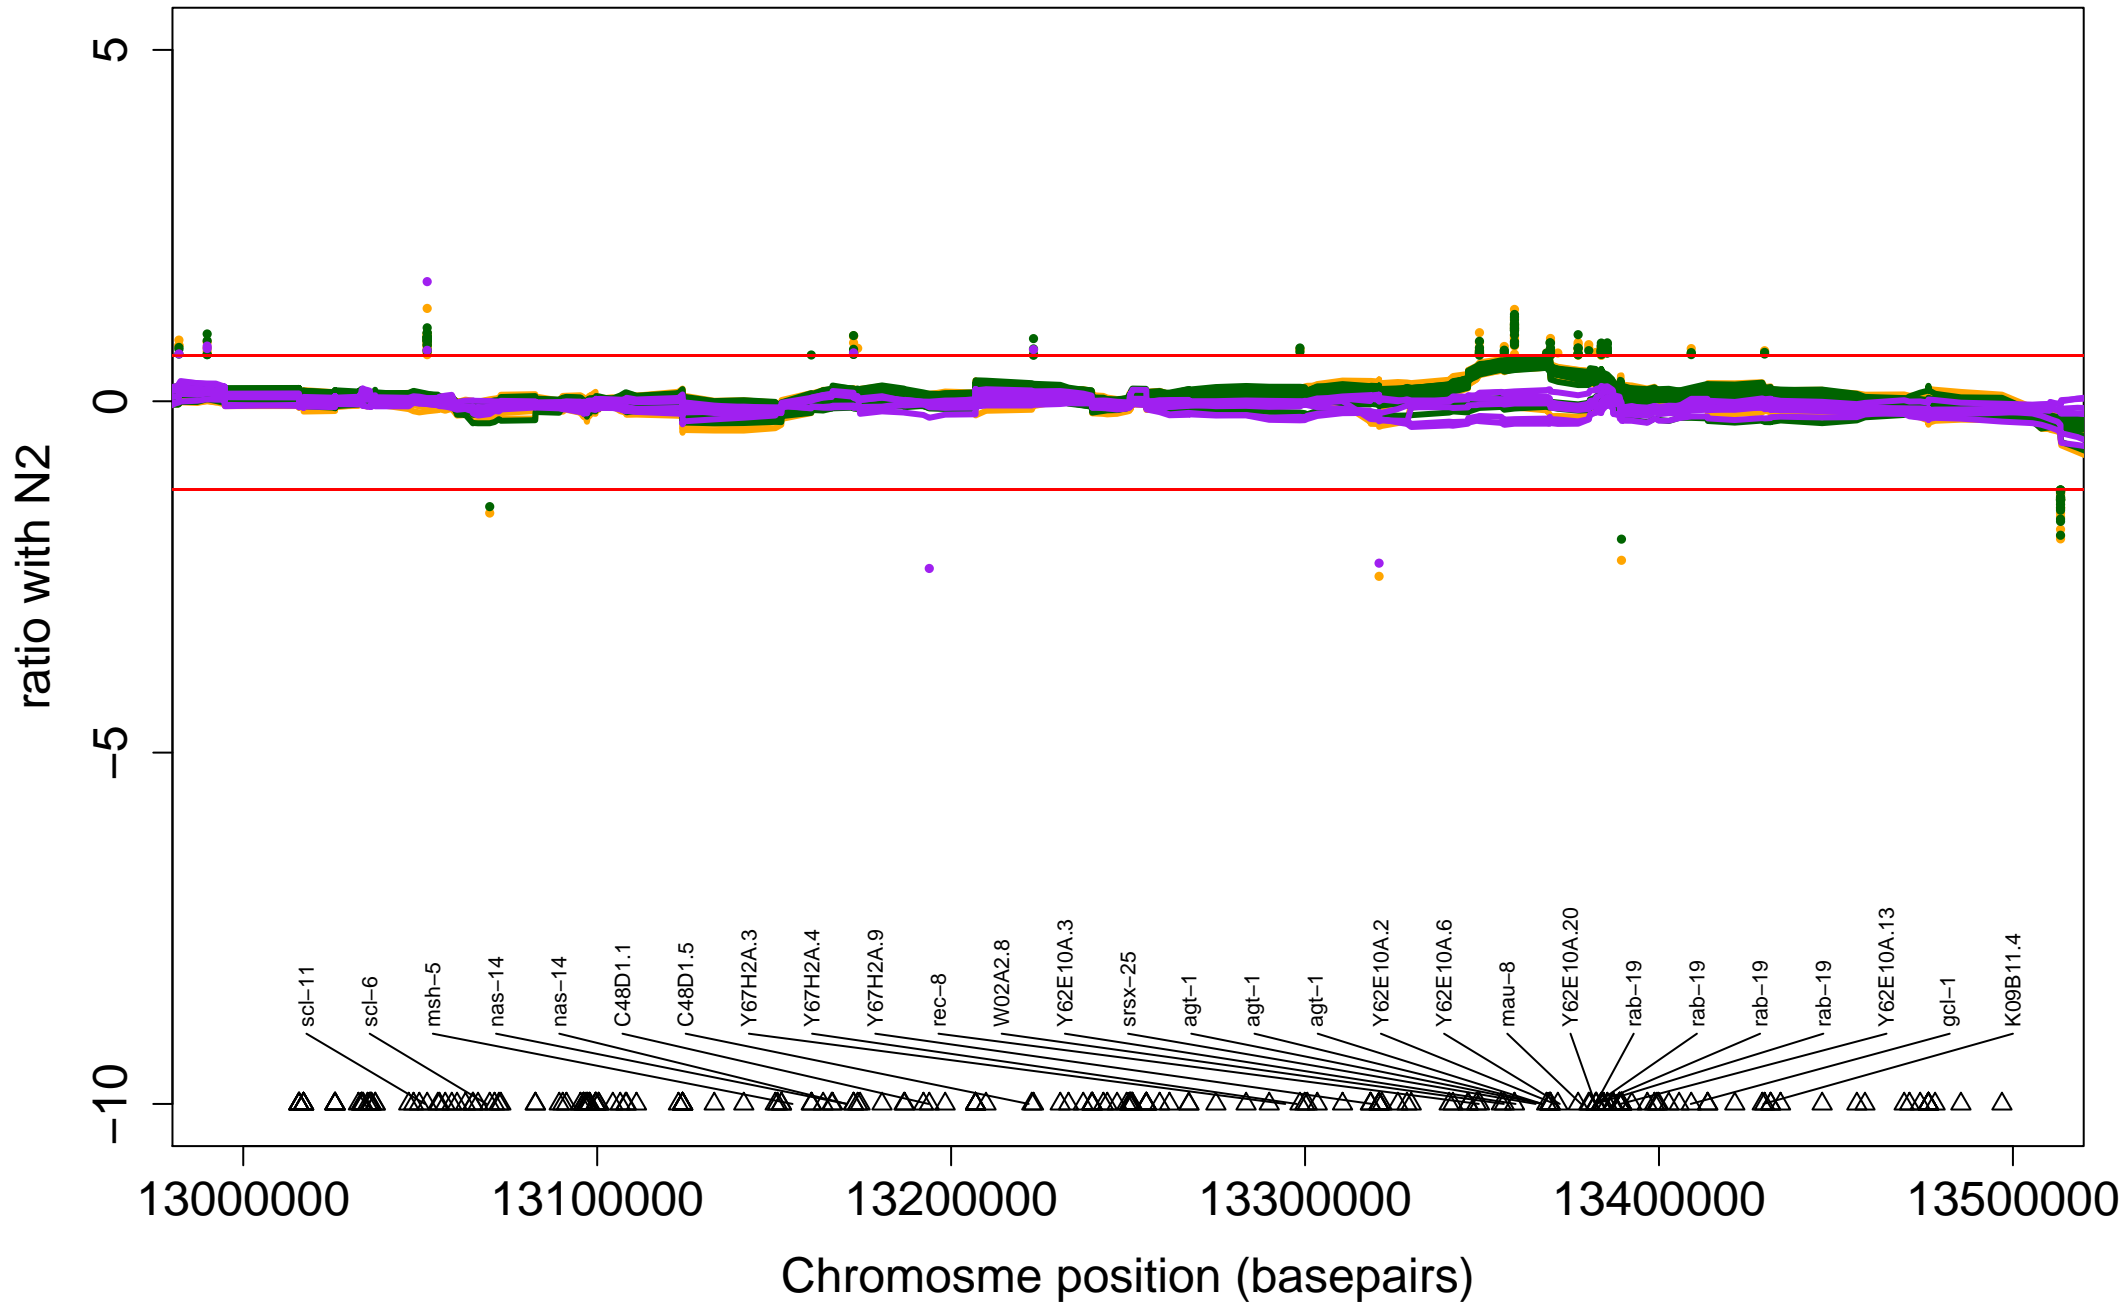

IV

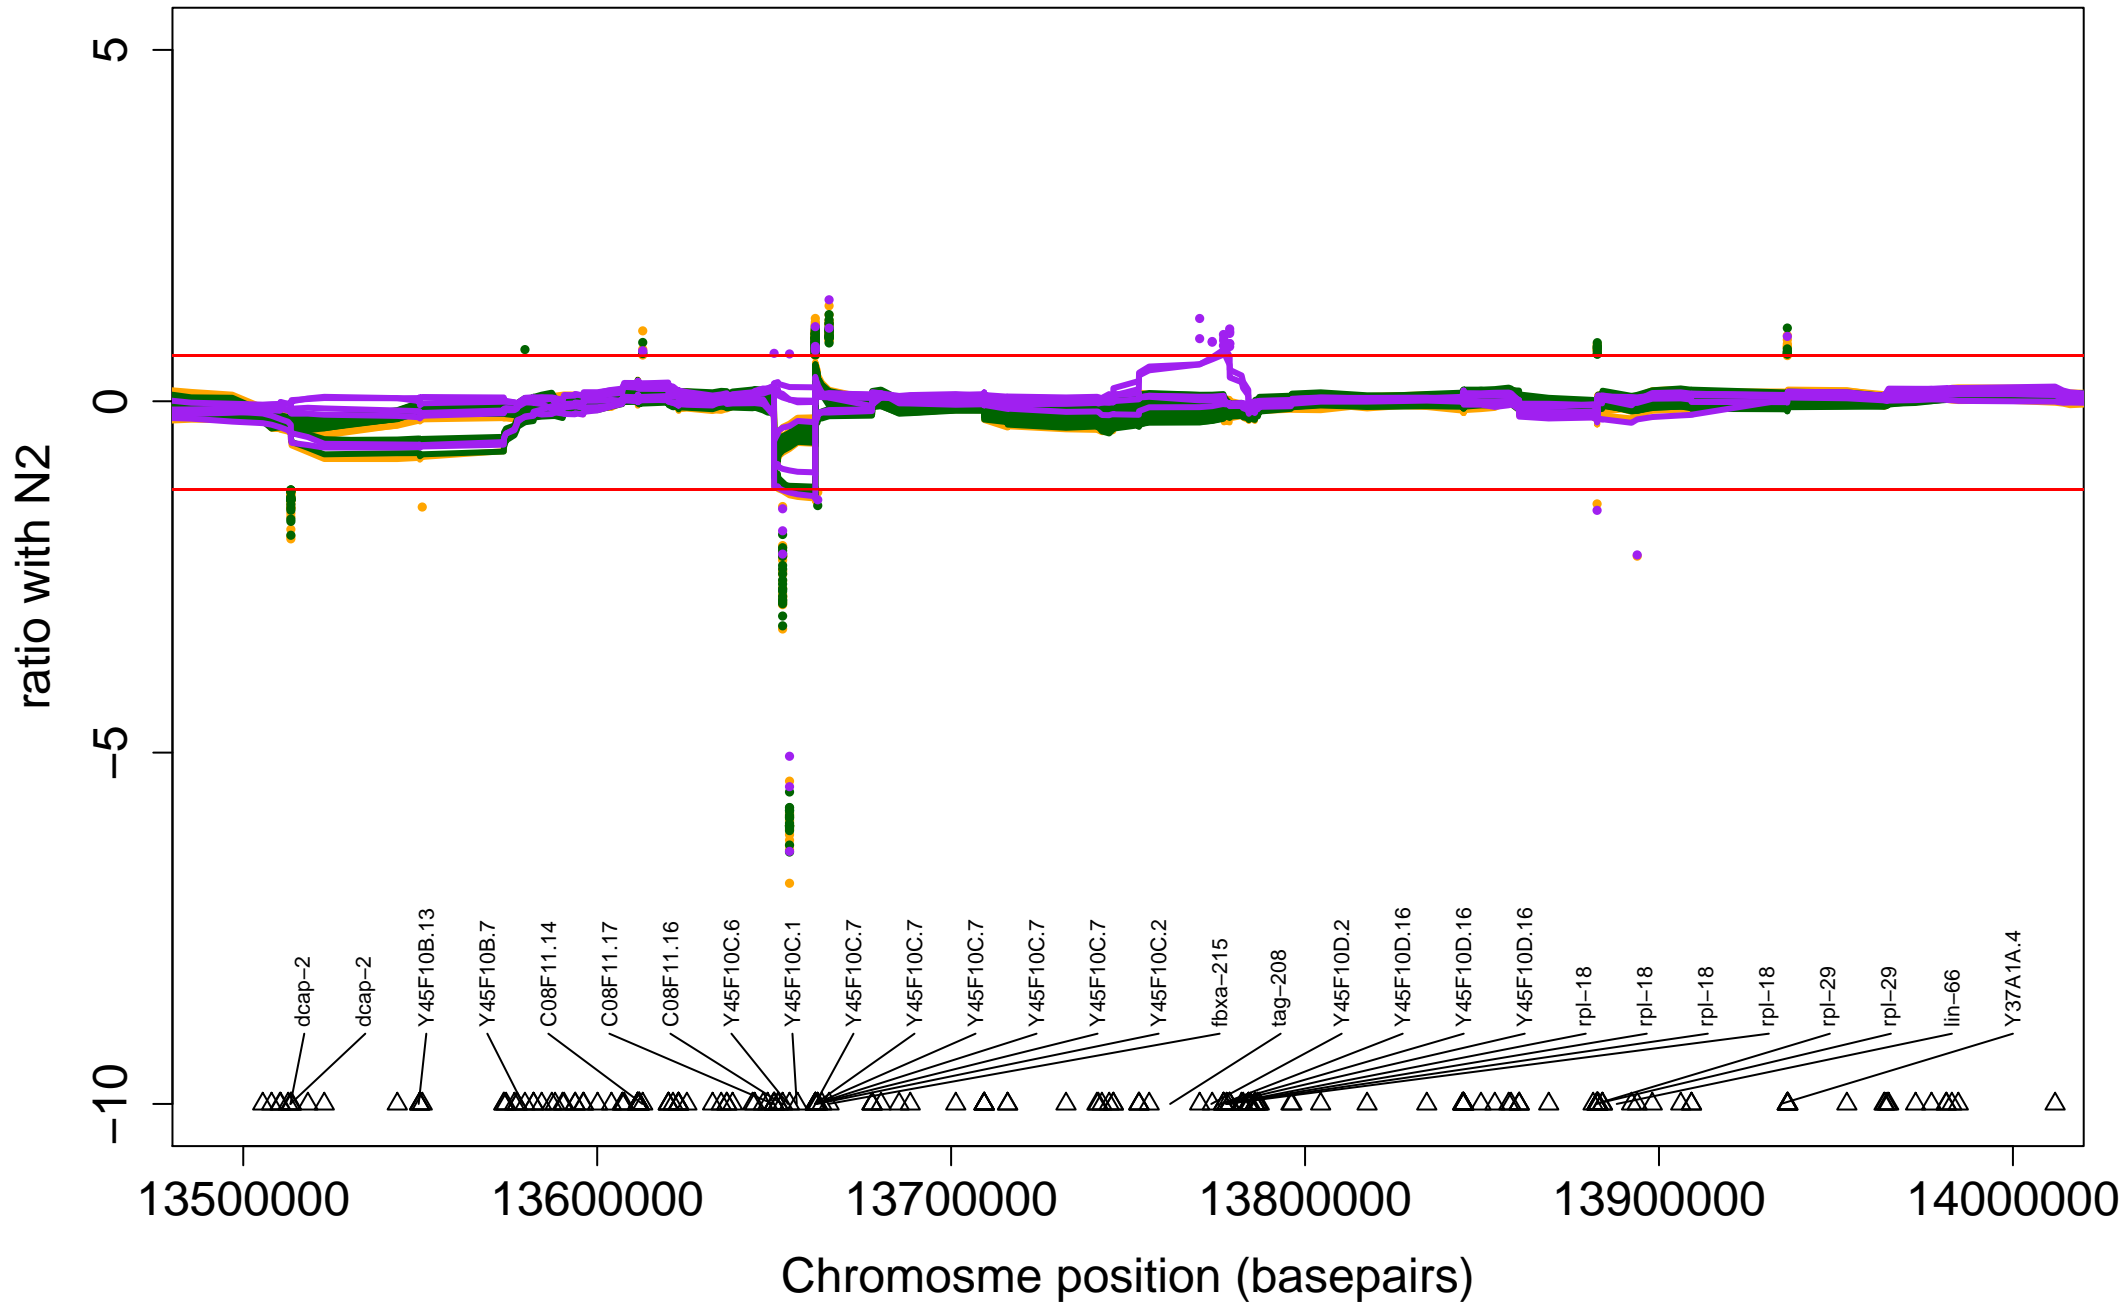



IV

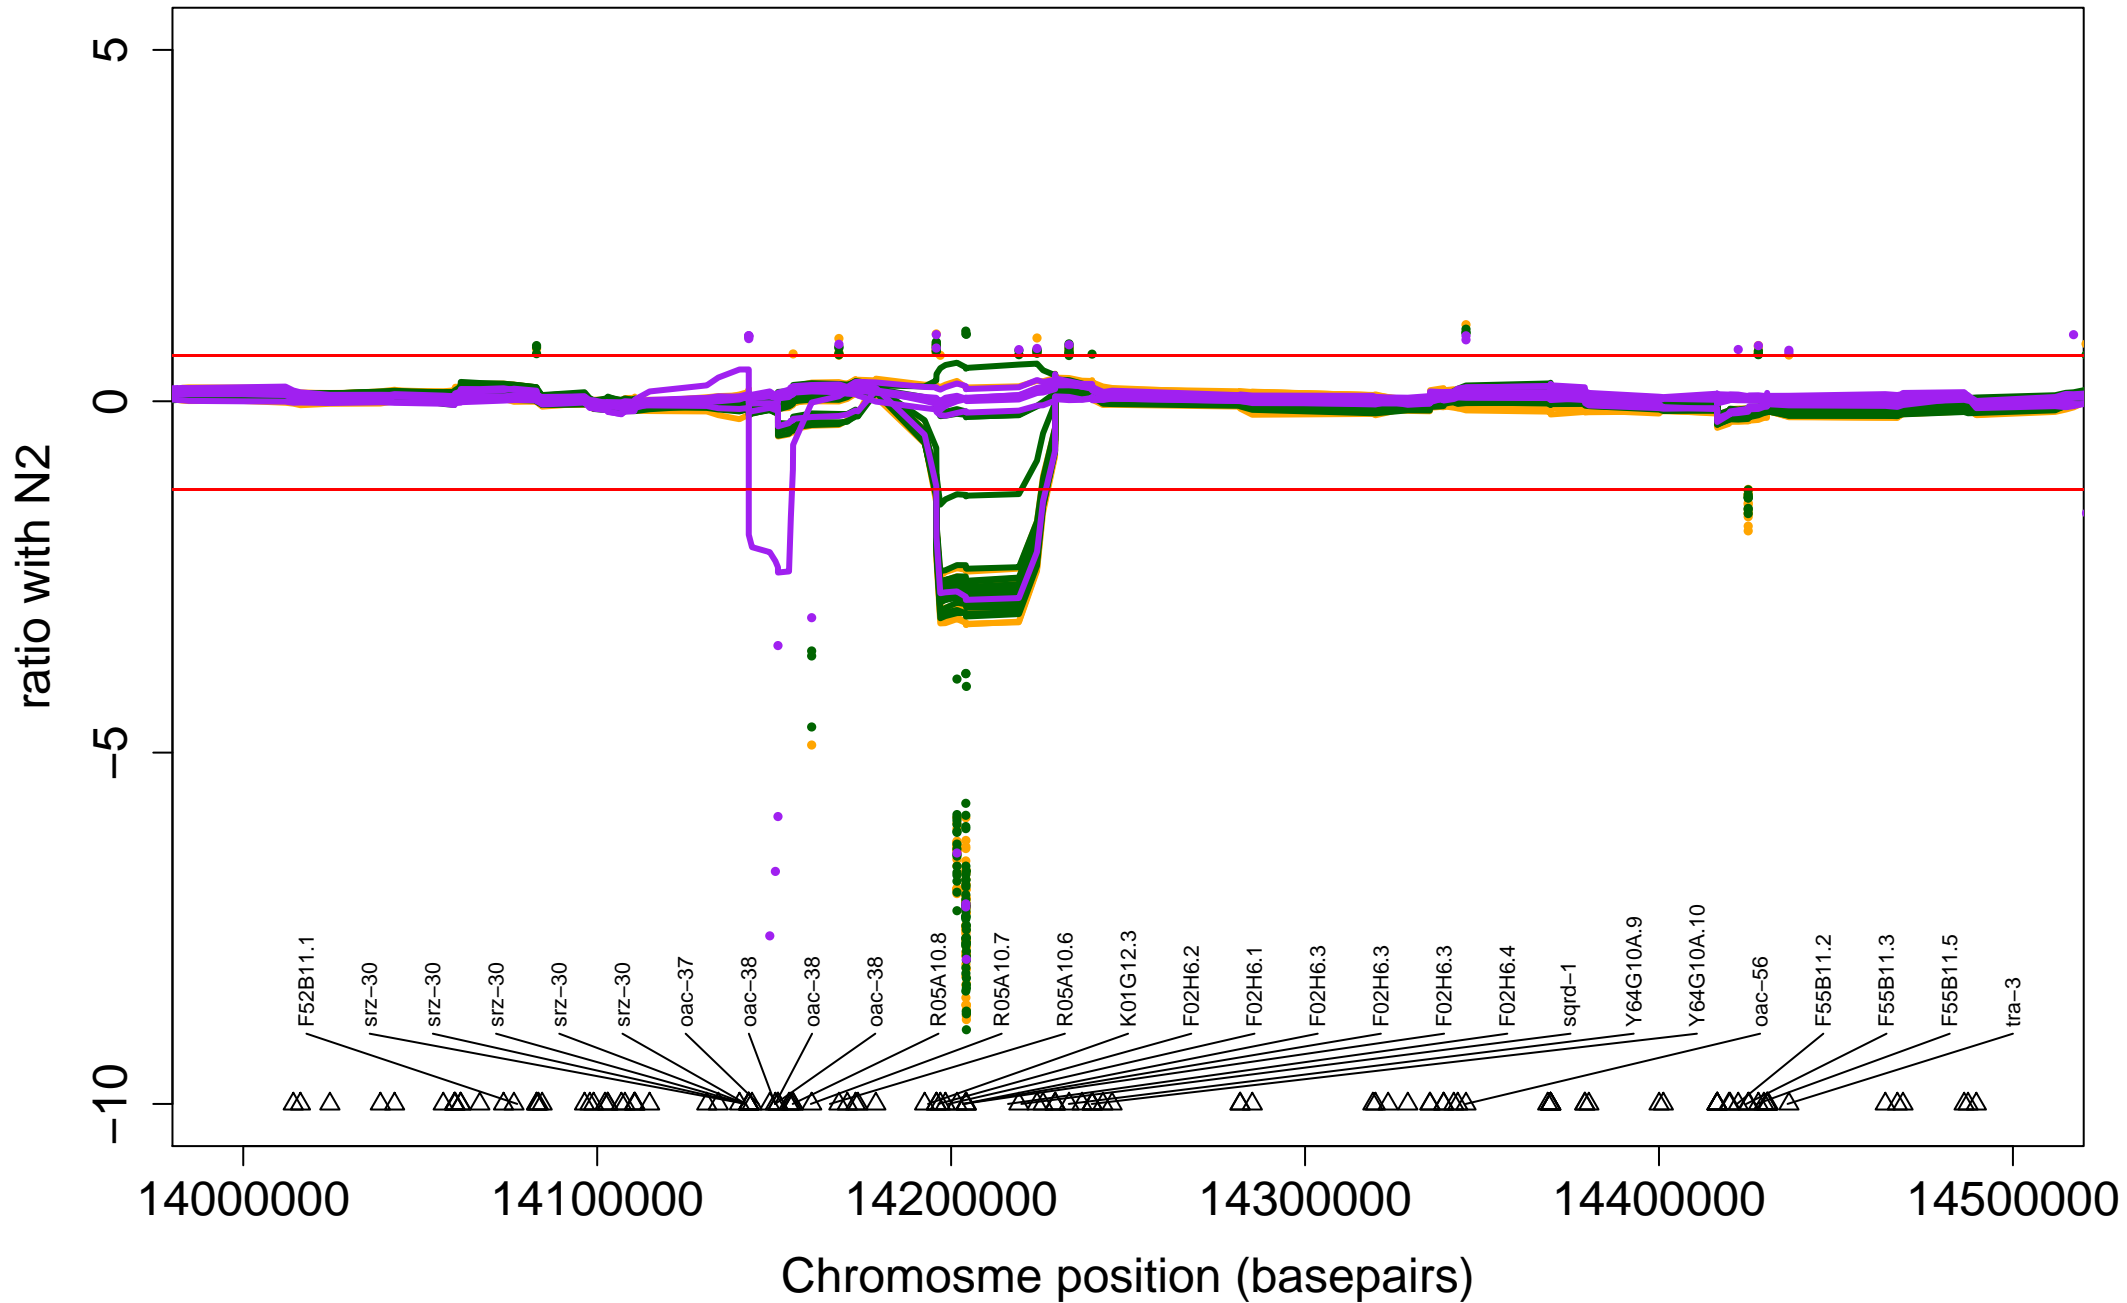

## IV

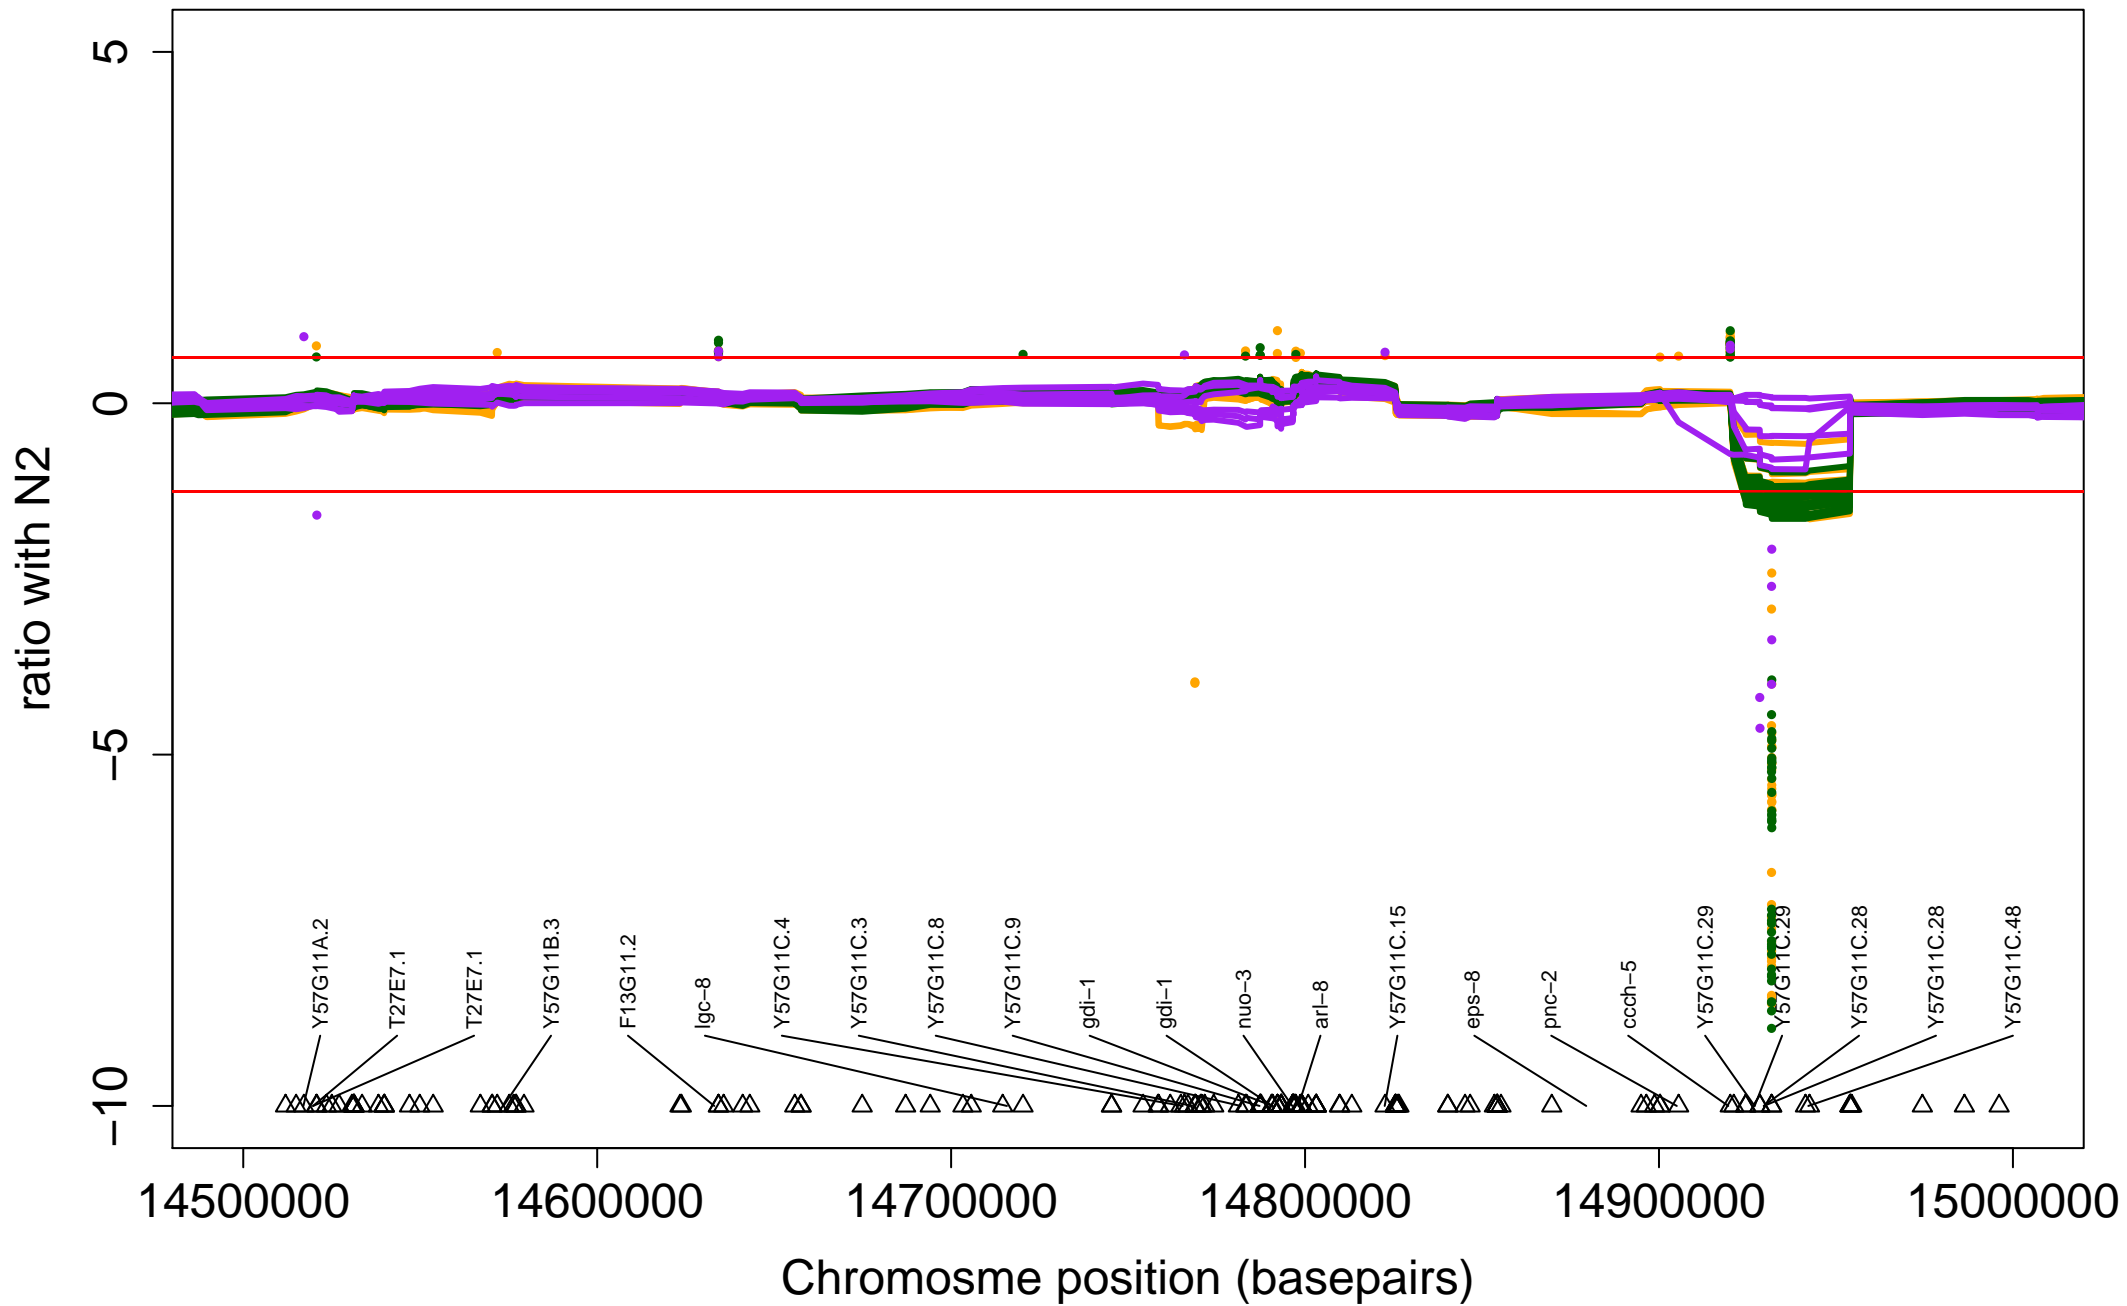

IV

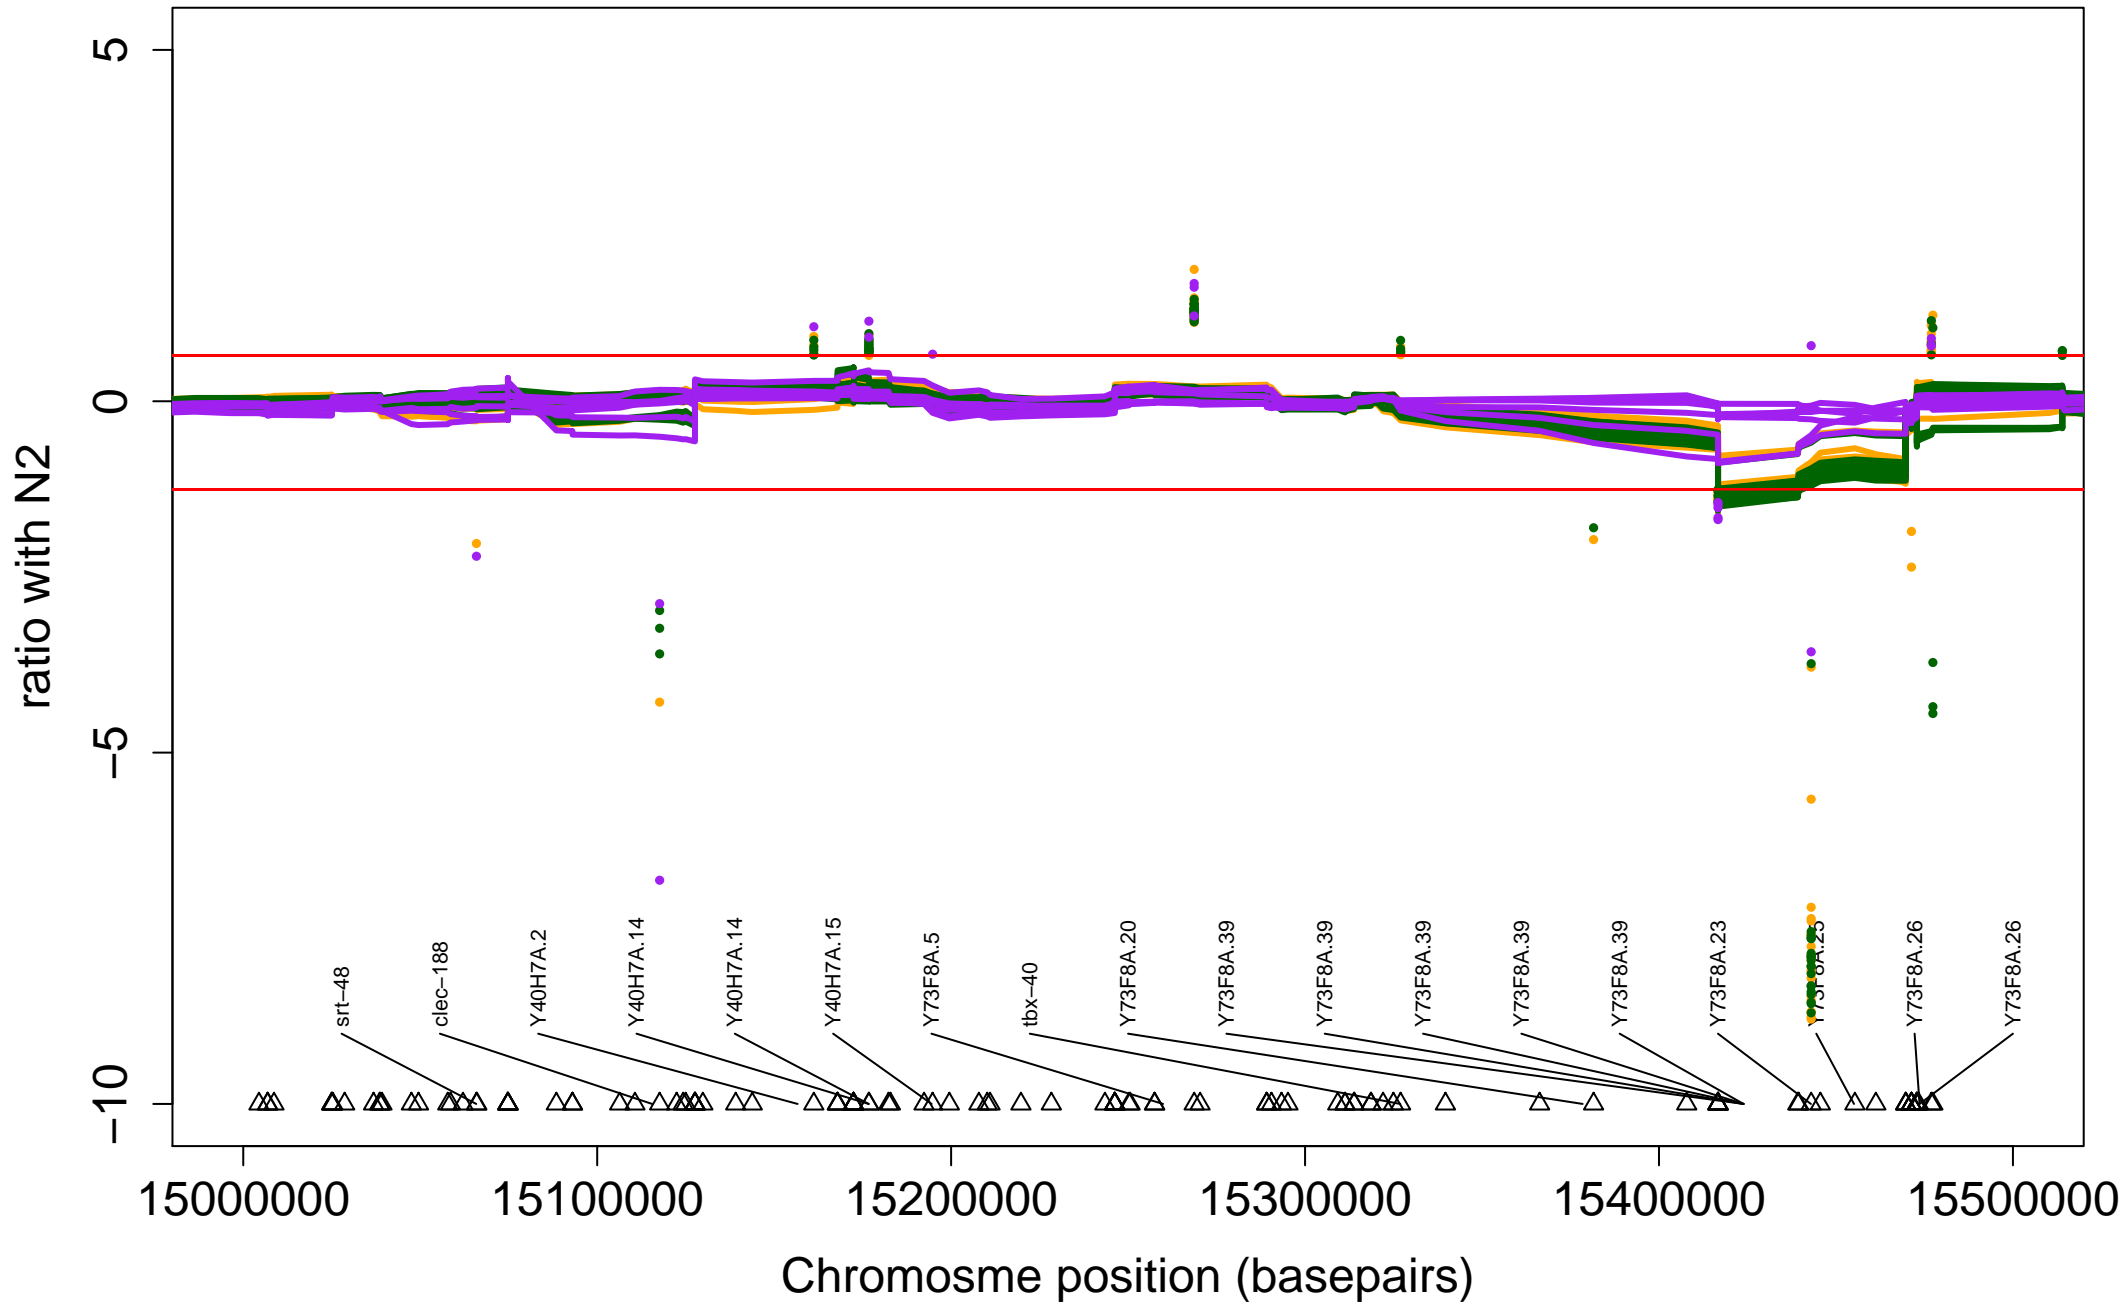

IV

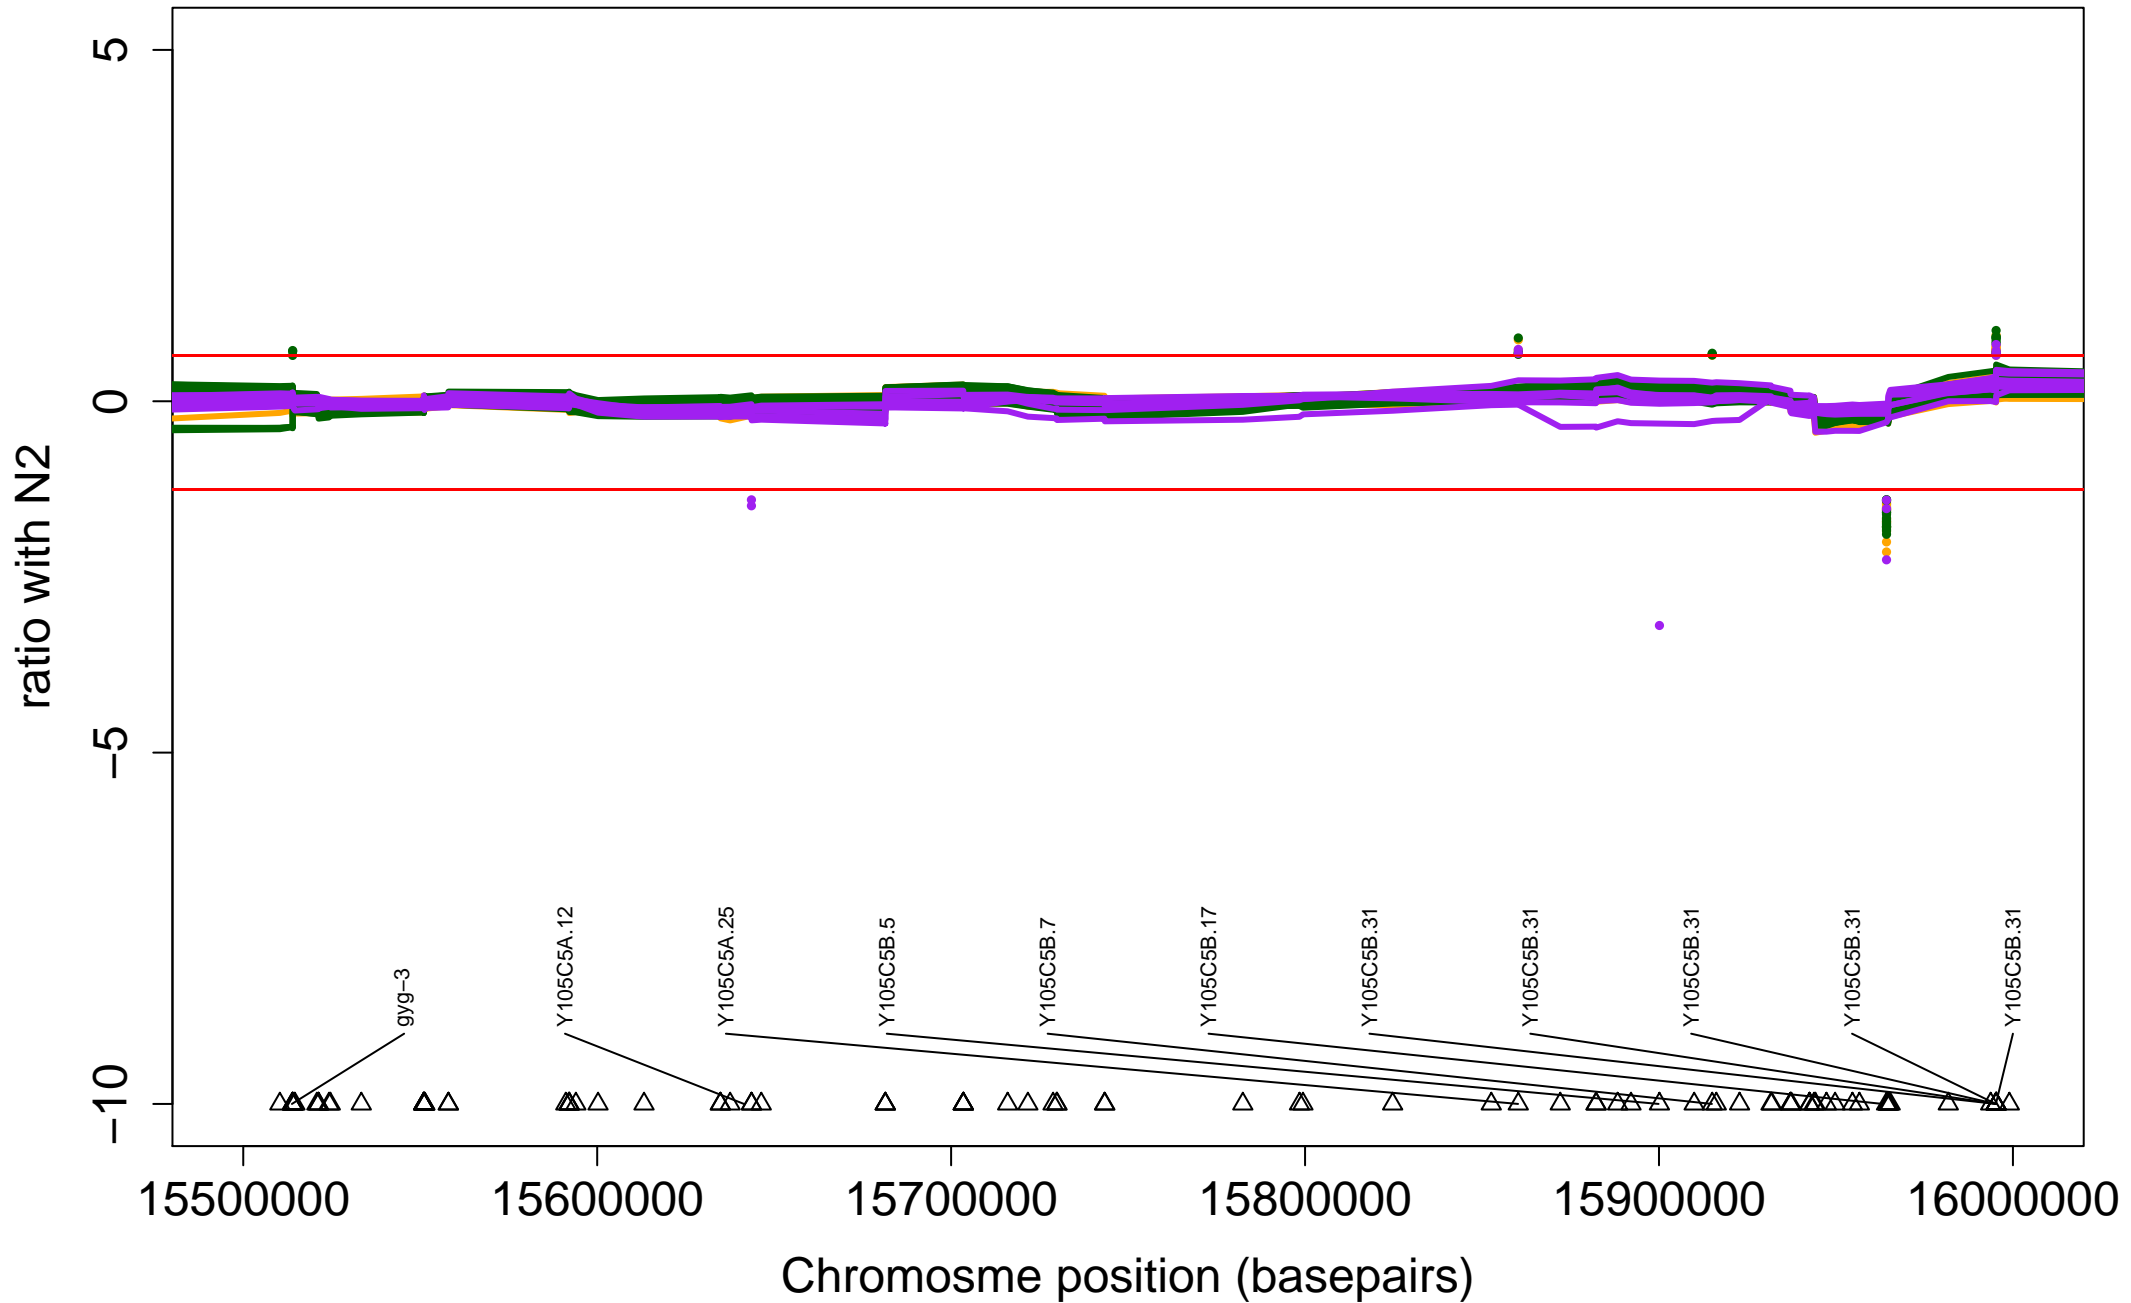

IV

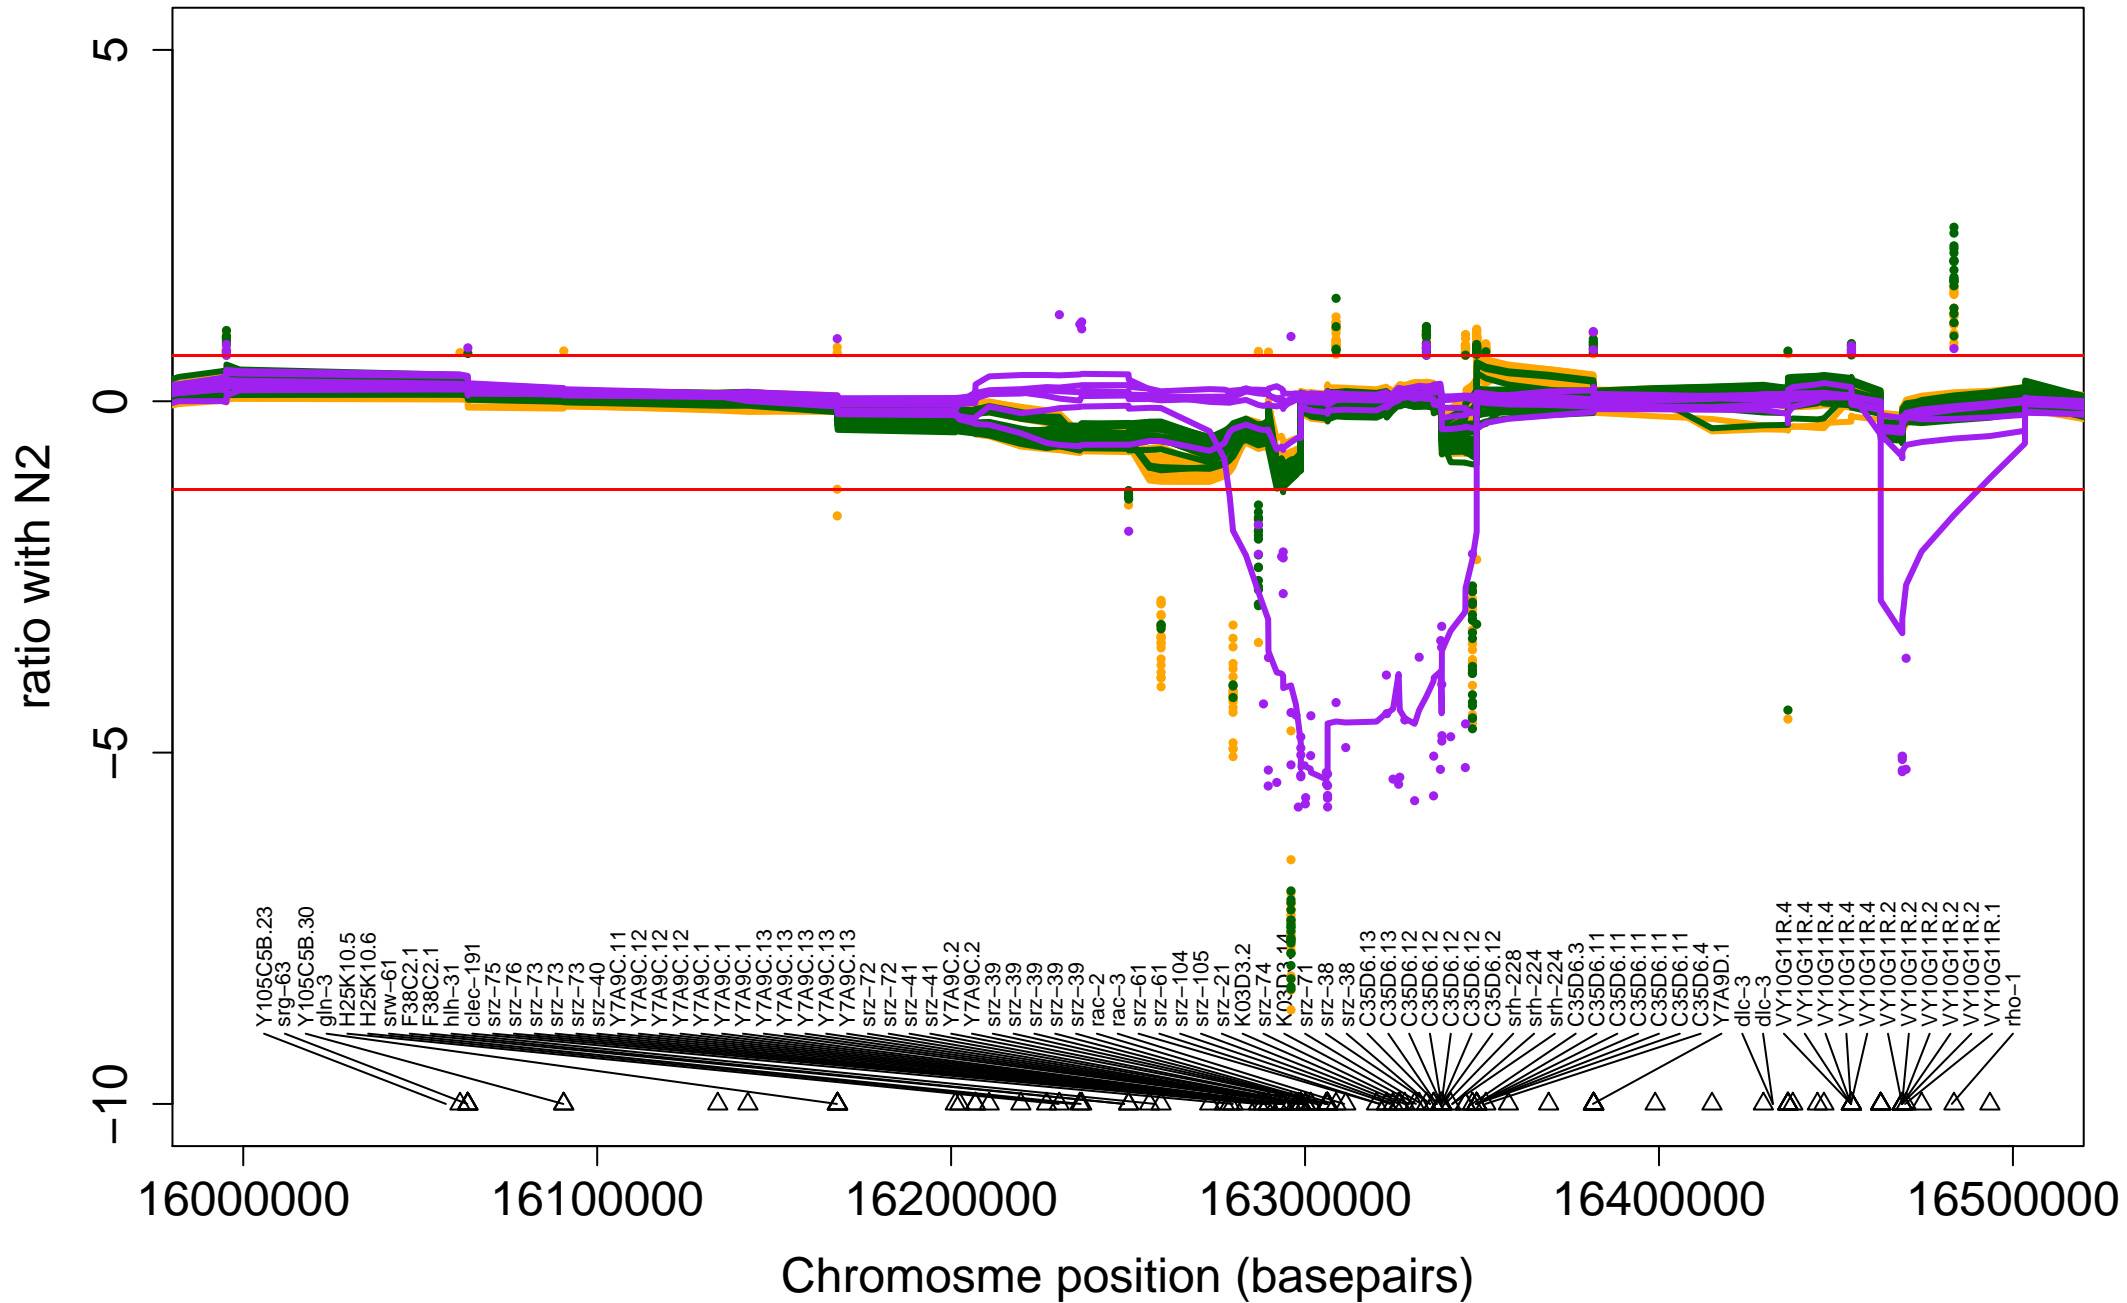

IV

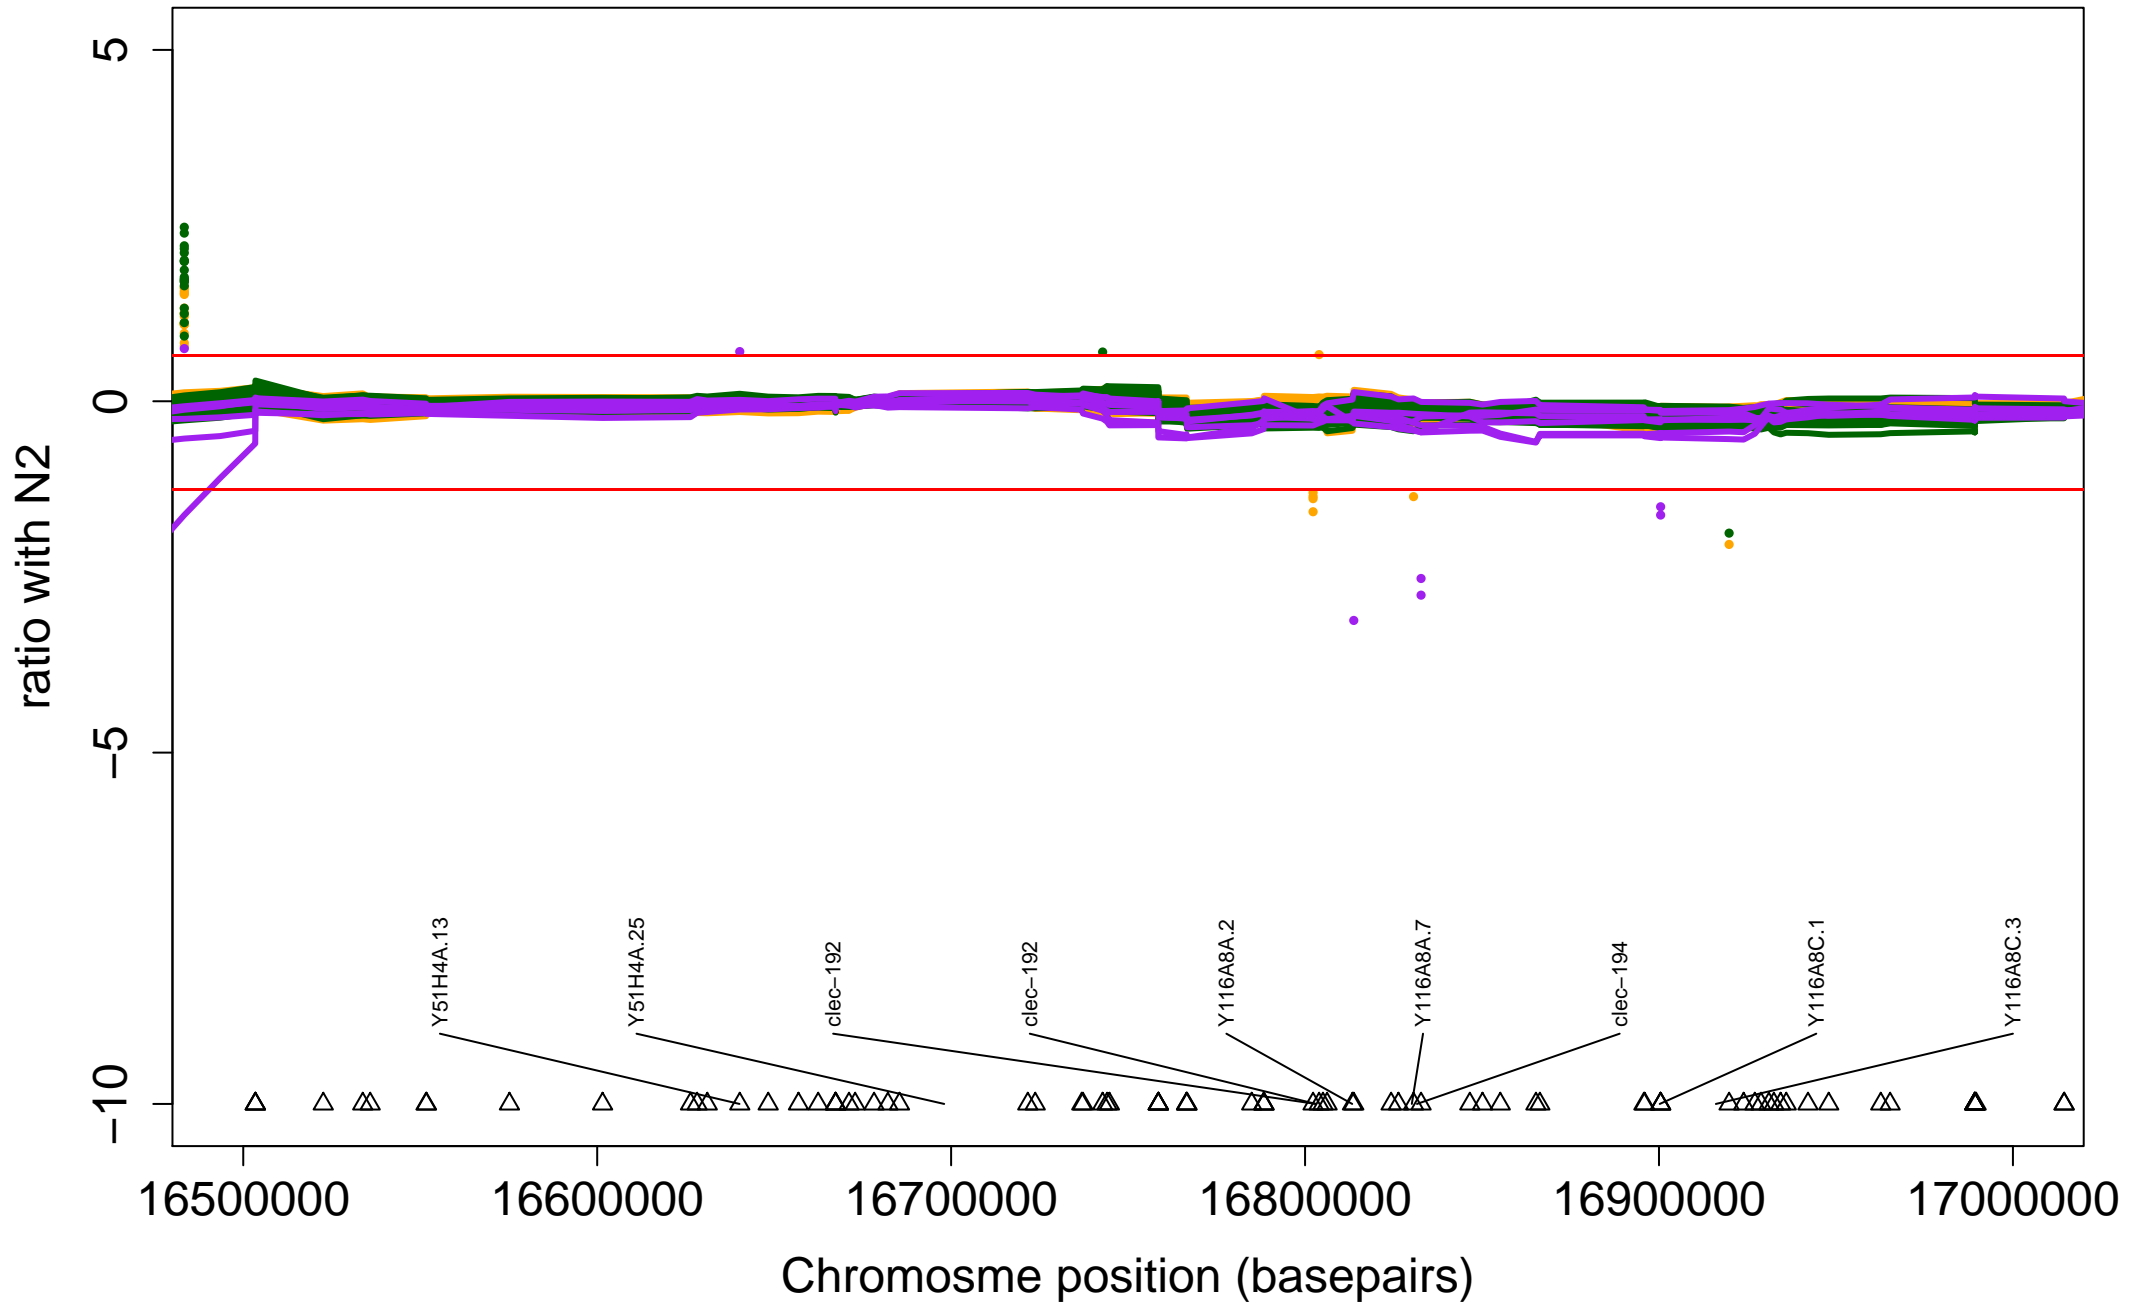

## IV

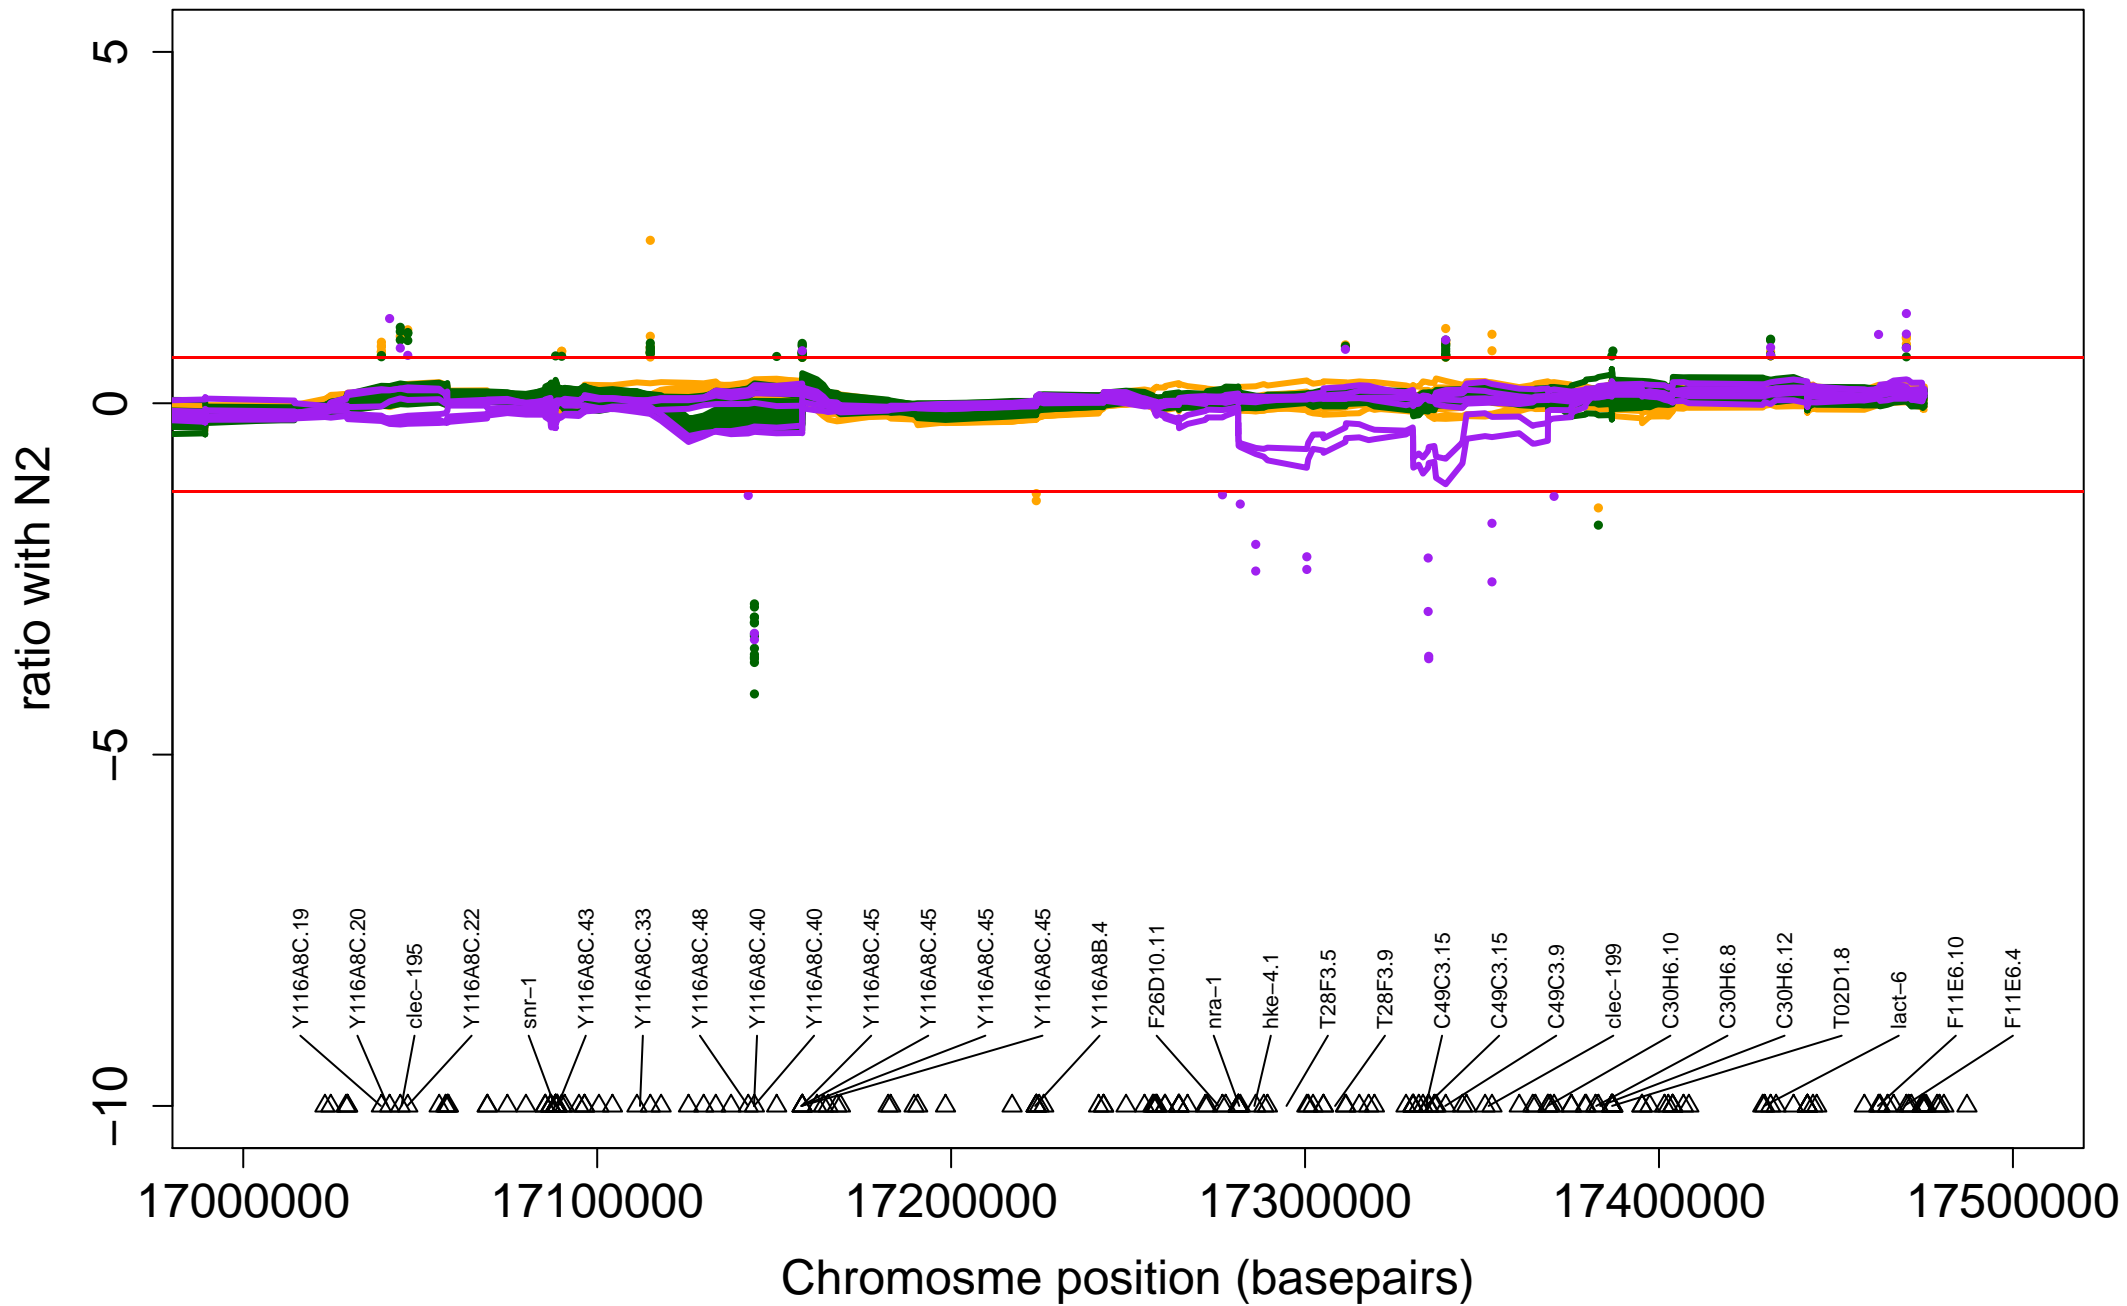

IV

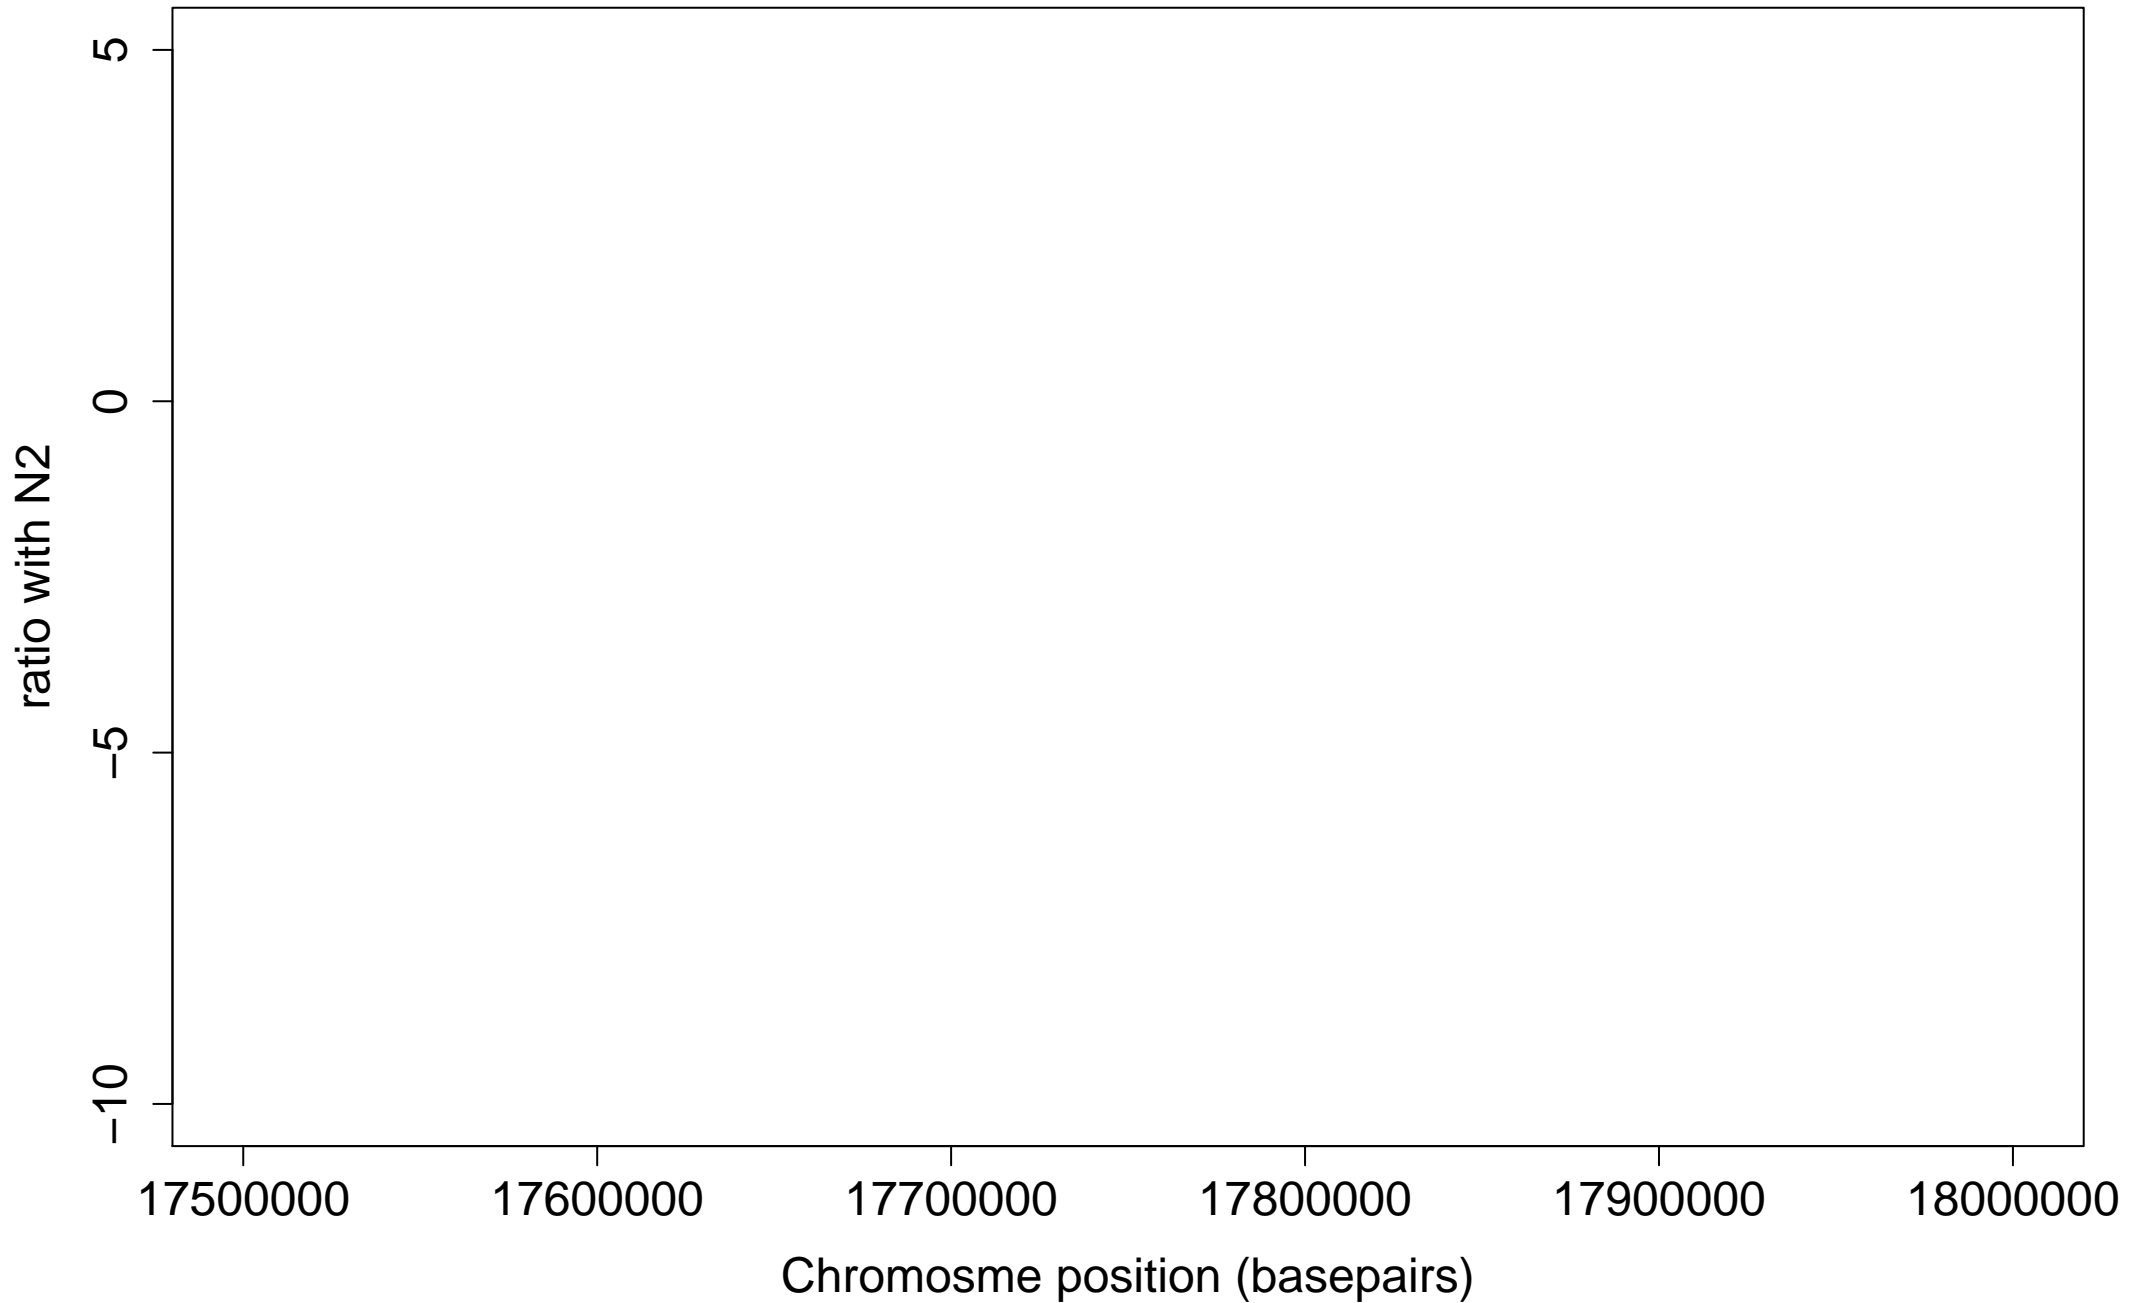



v

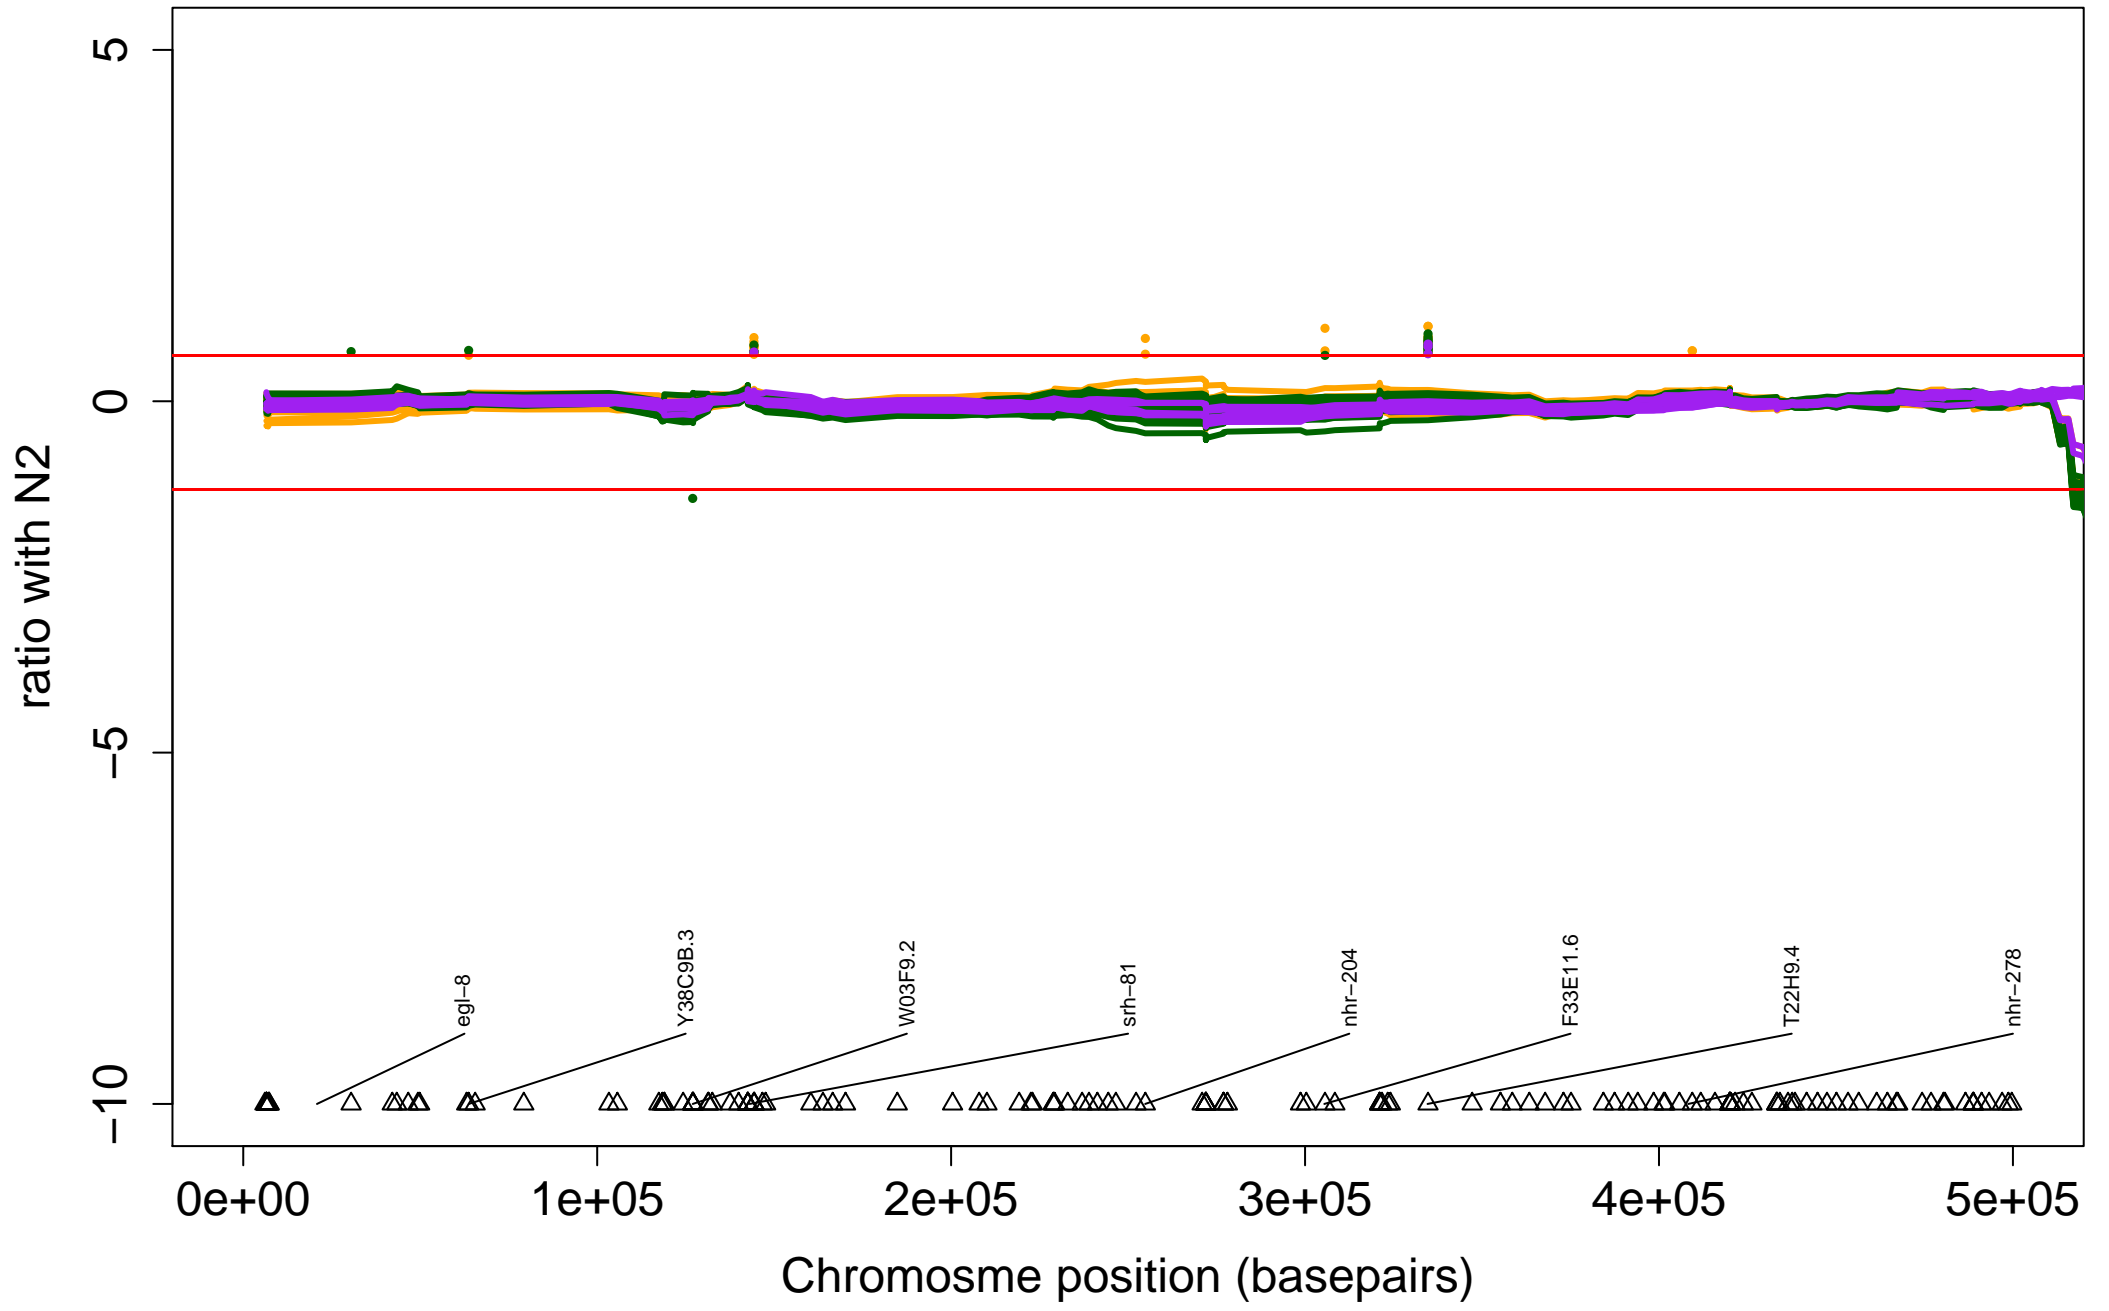

v

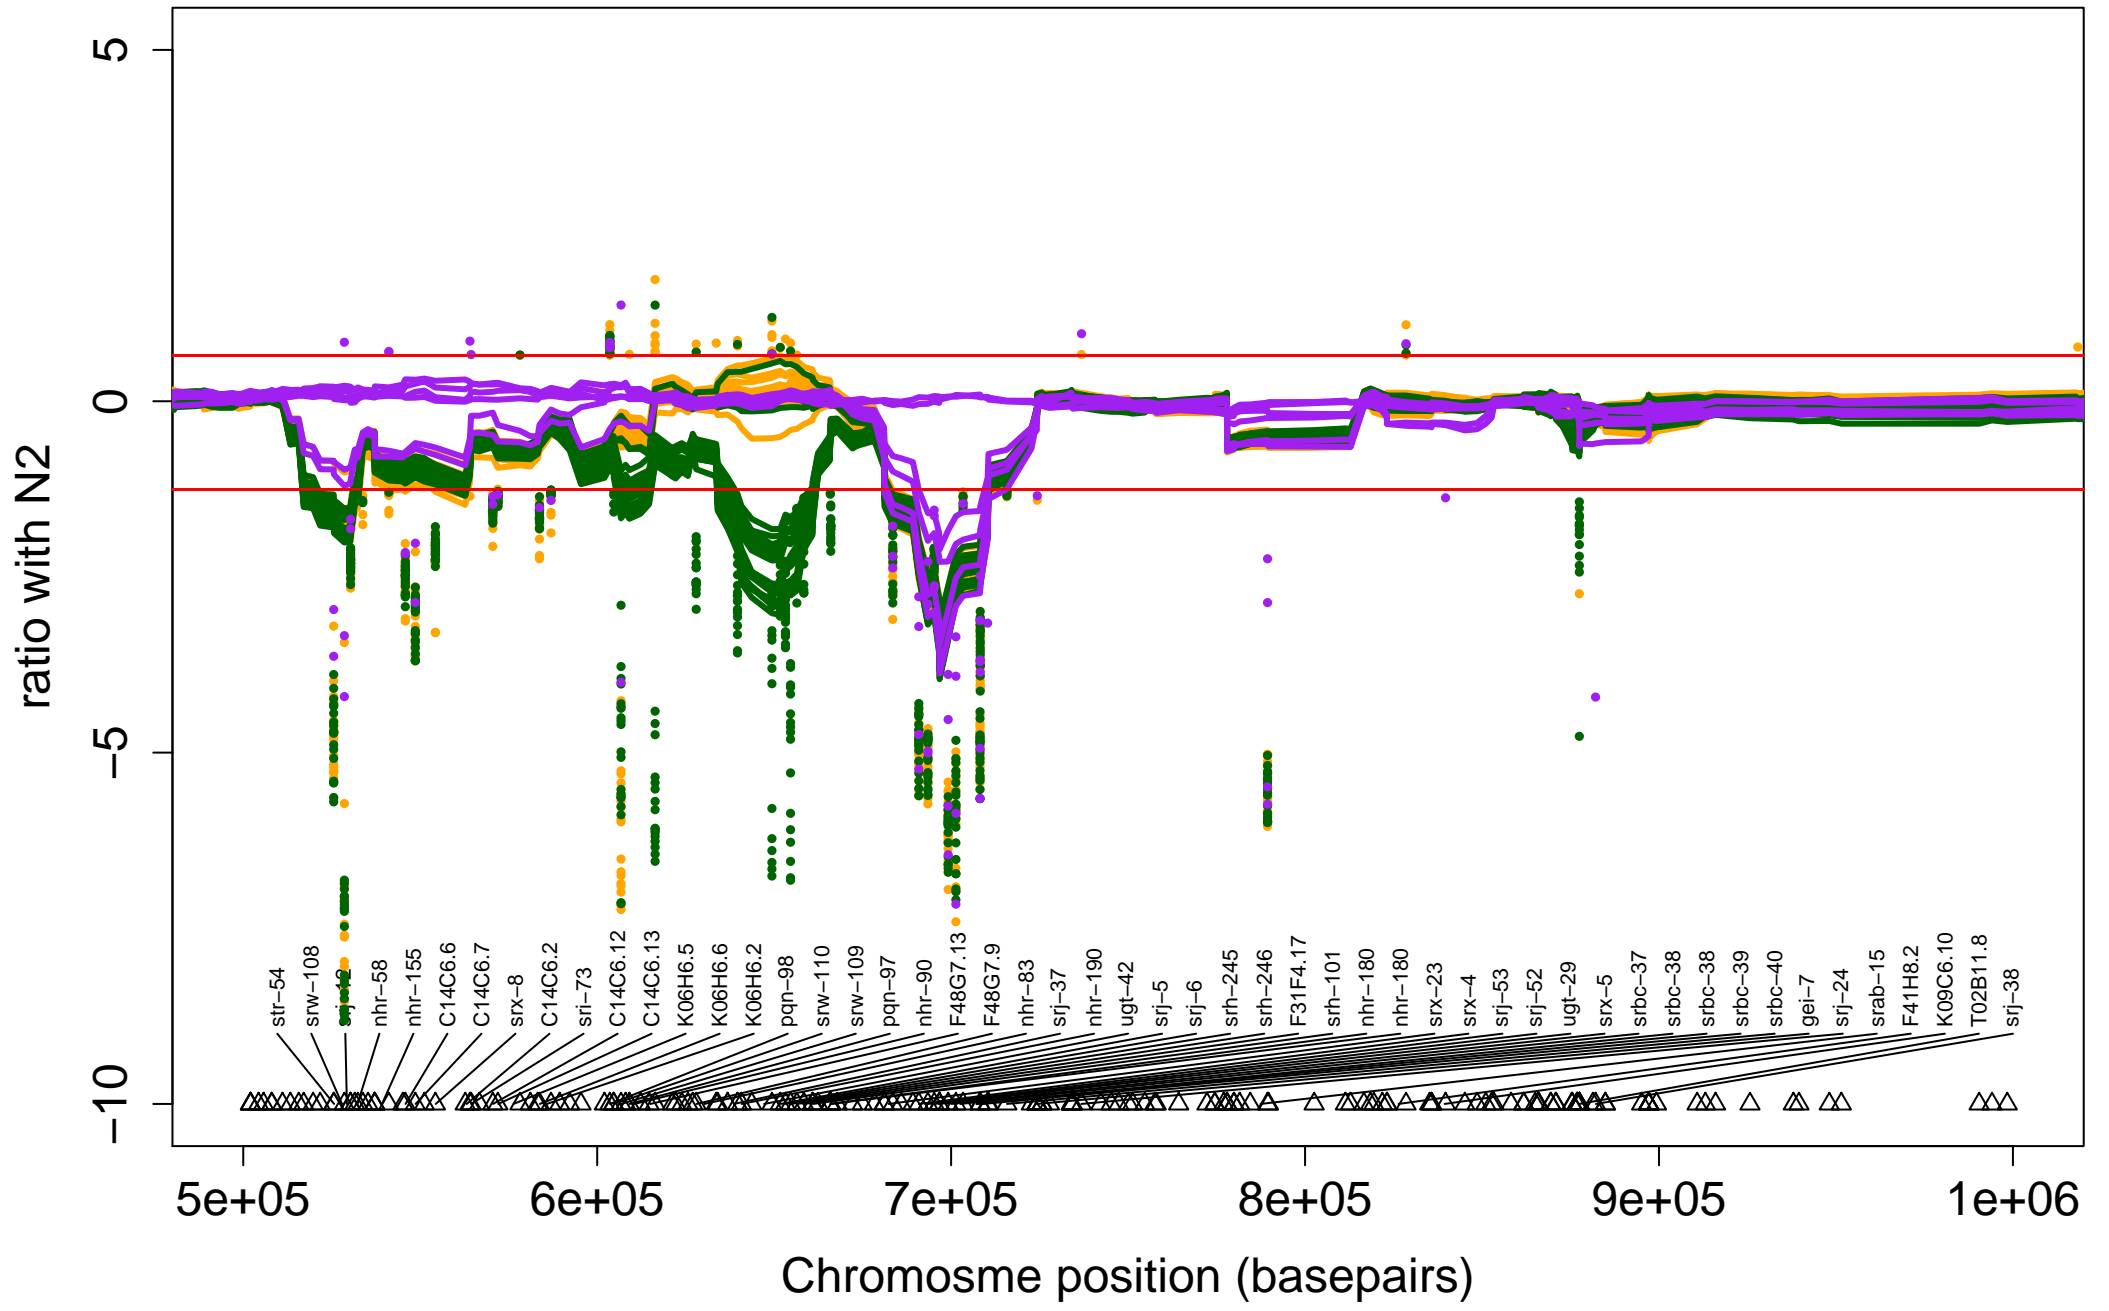

v

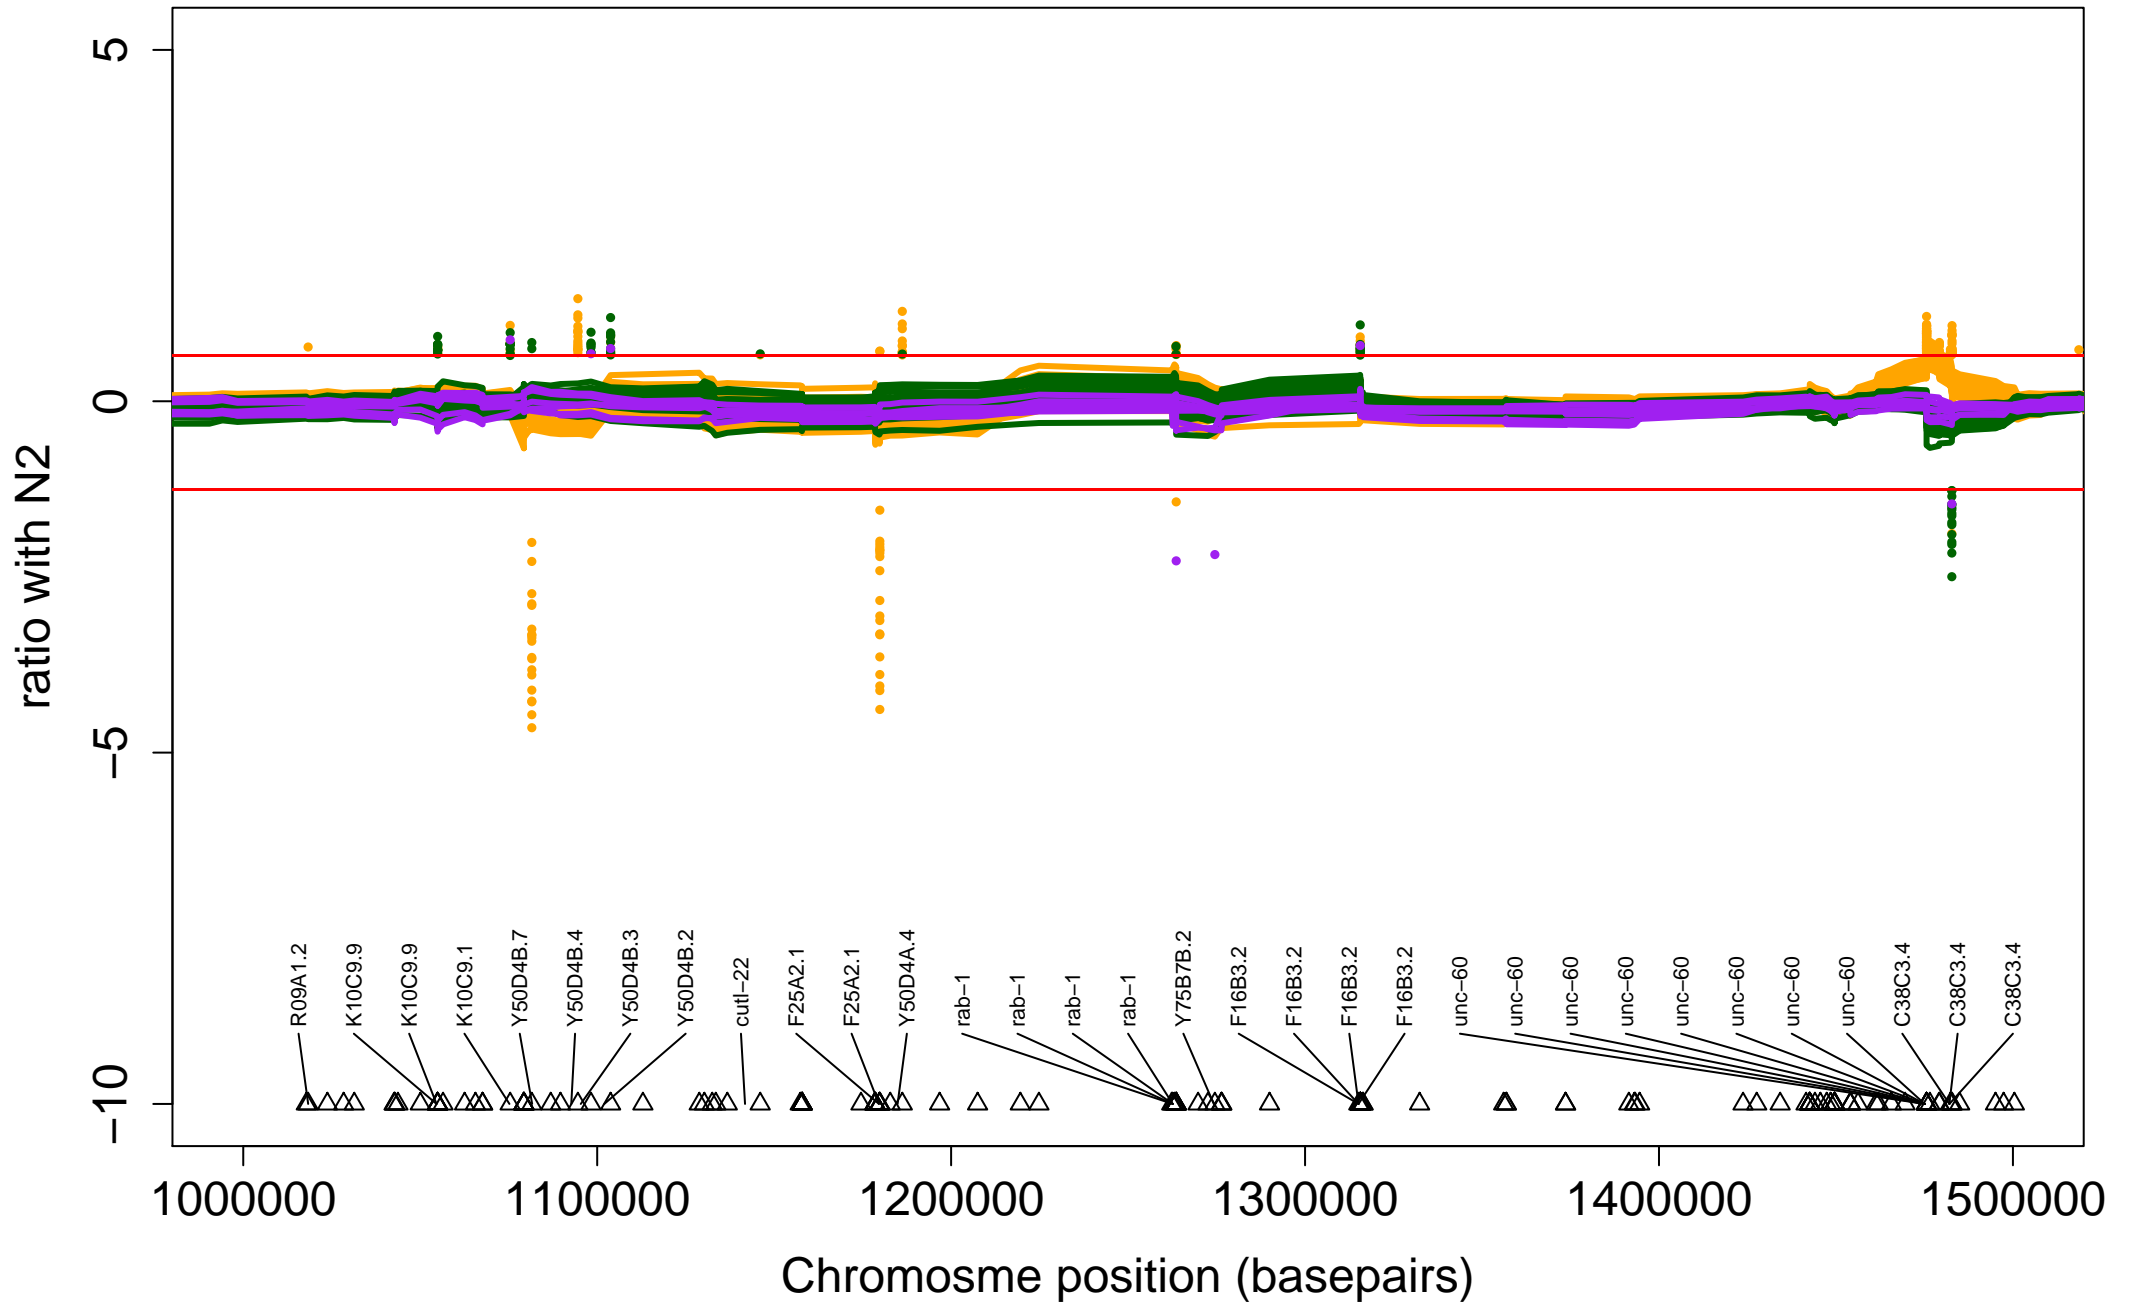

V

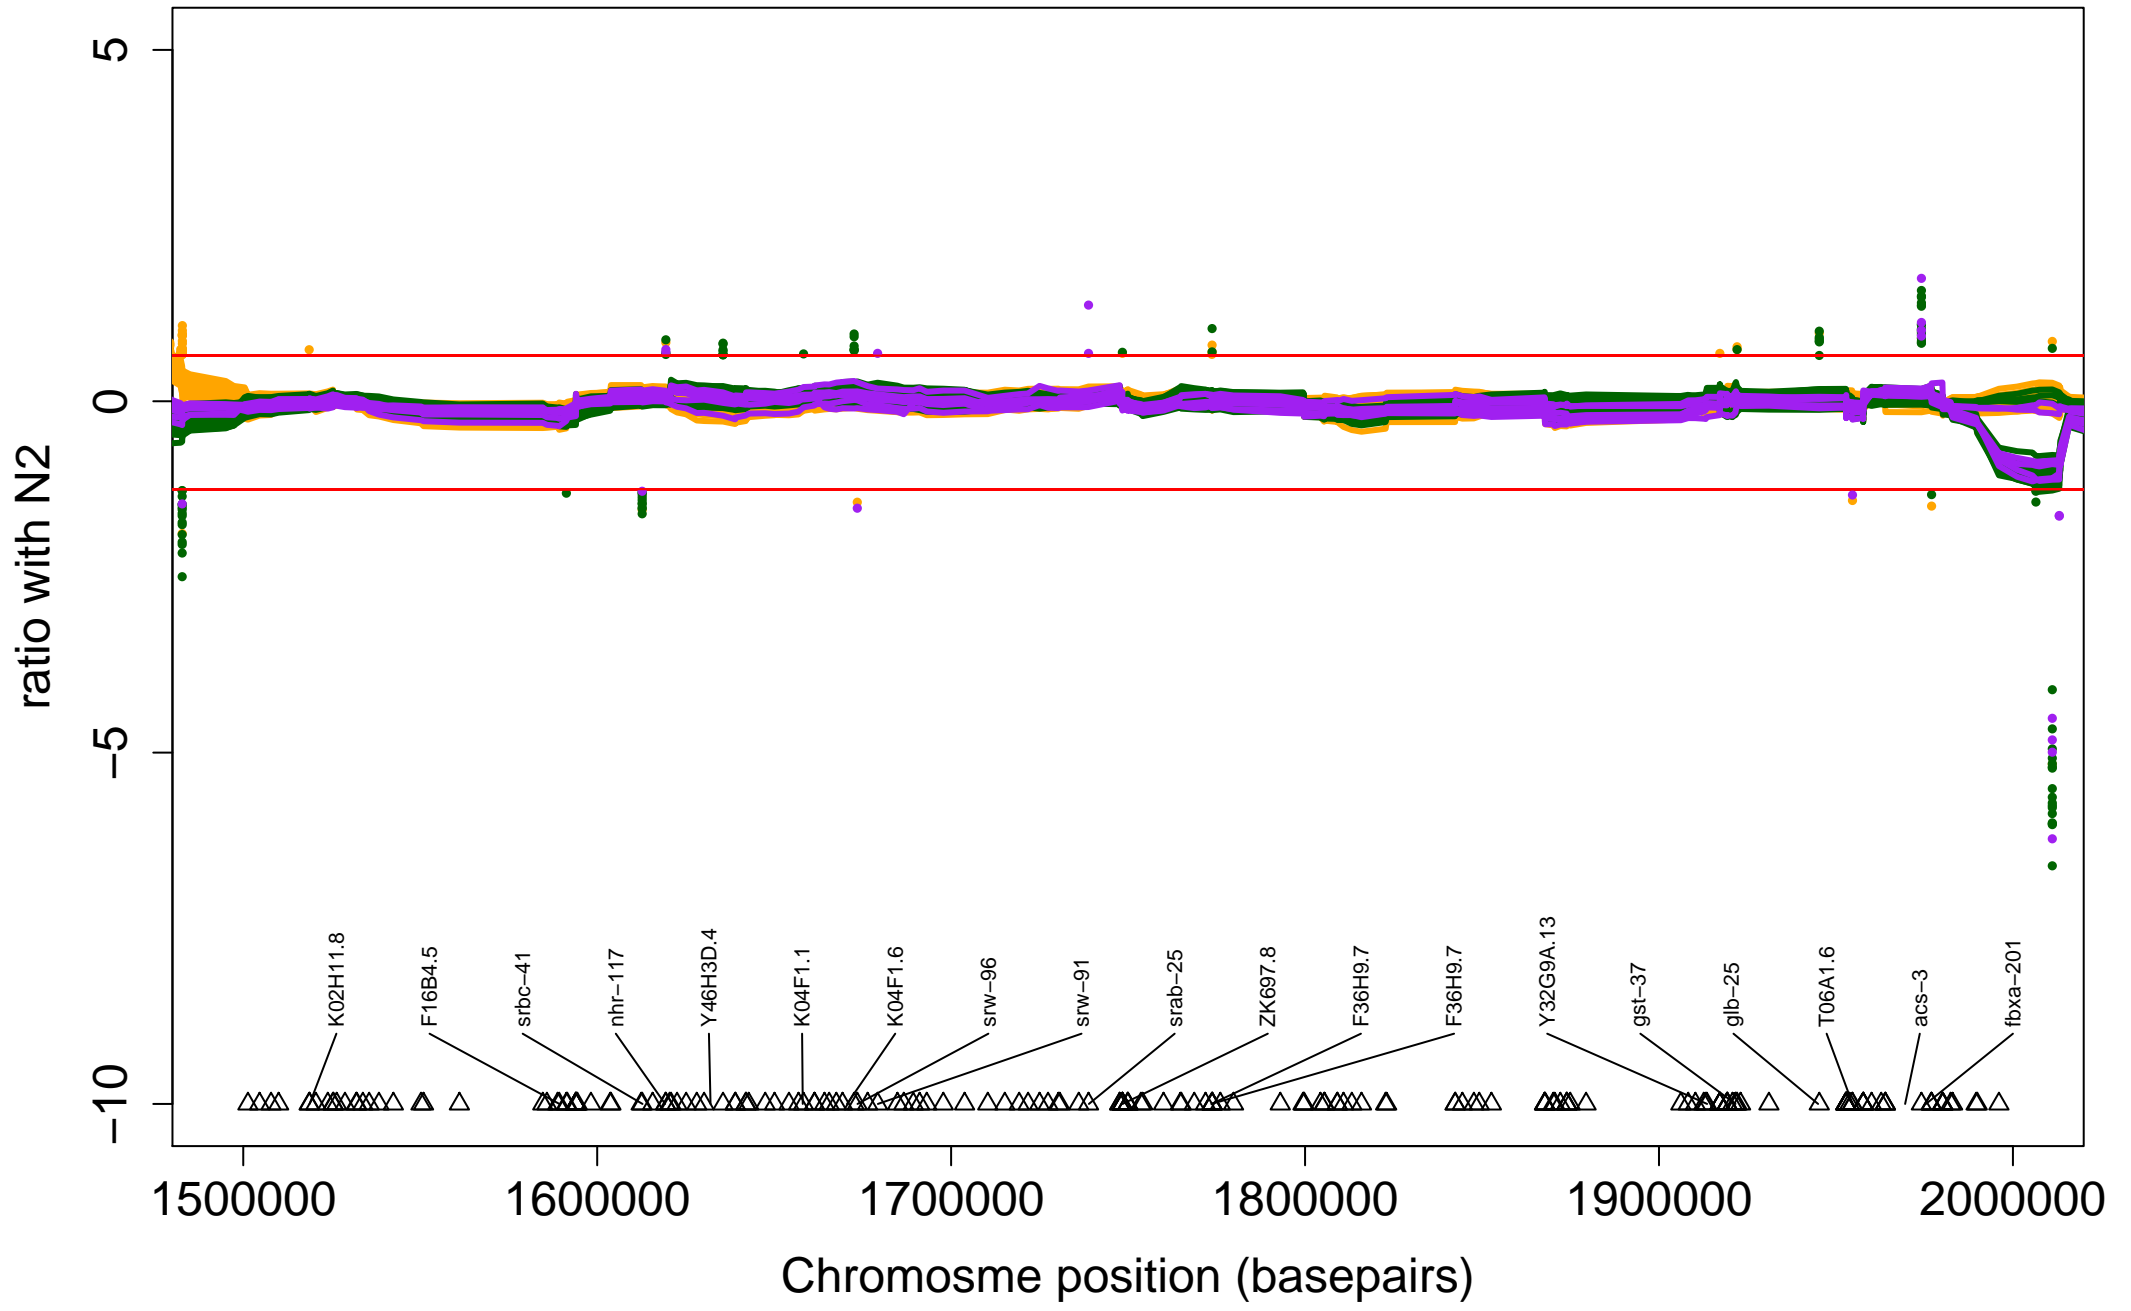

v

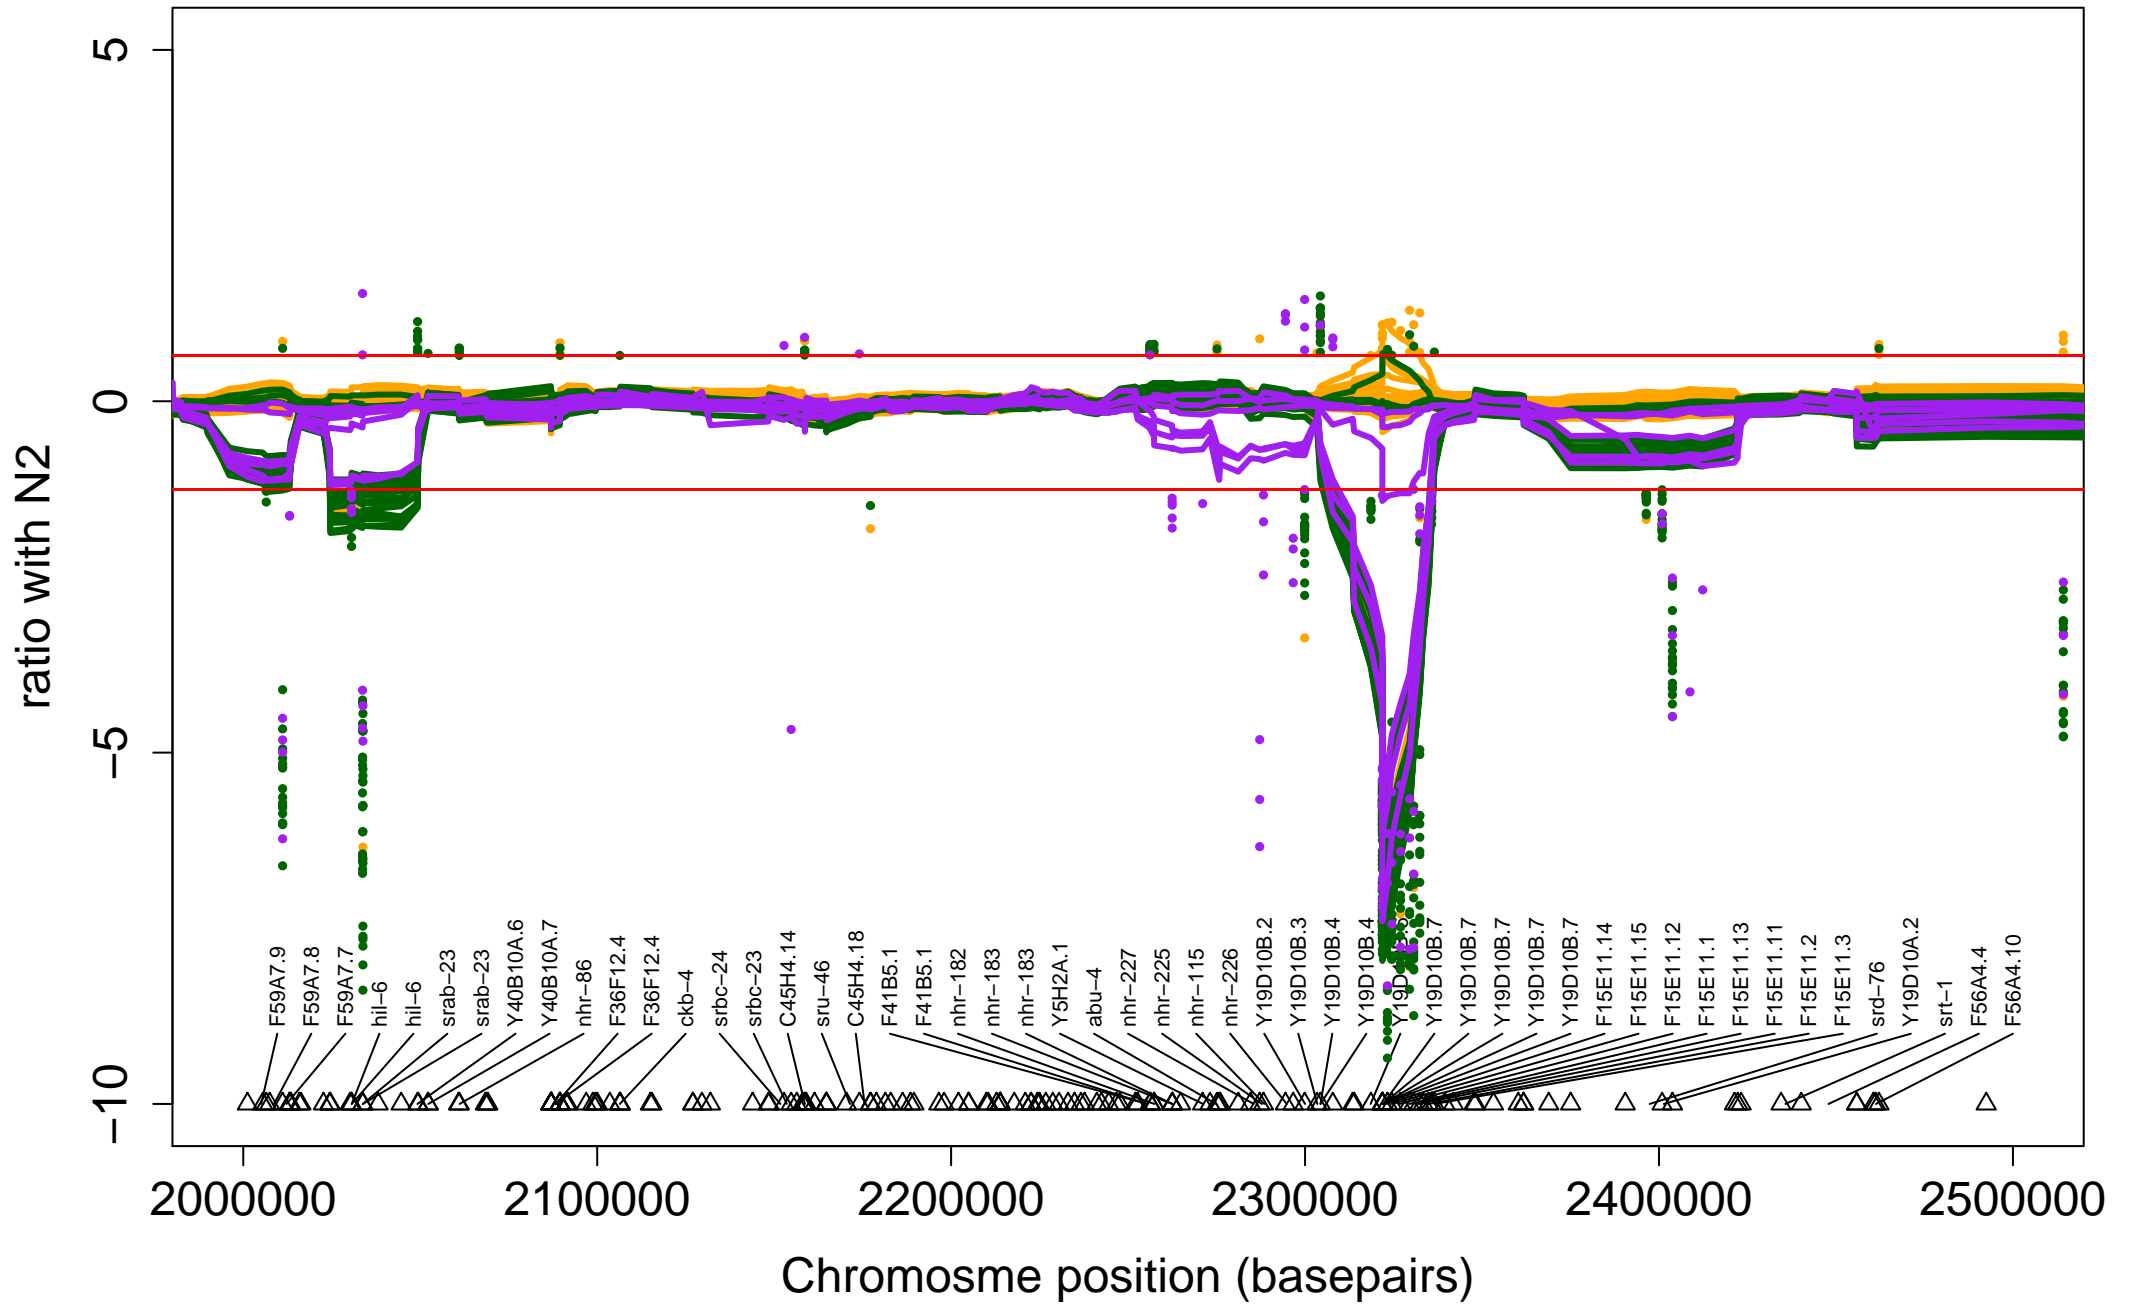

v

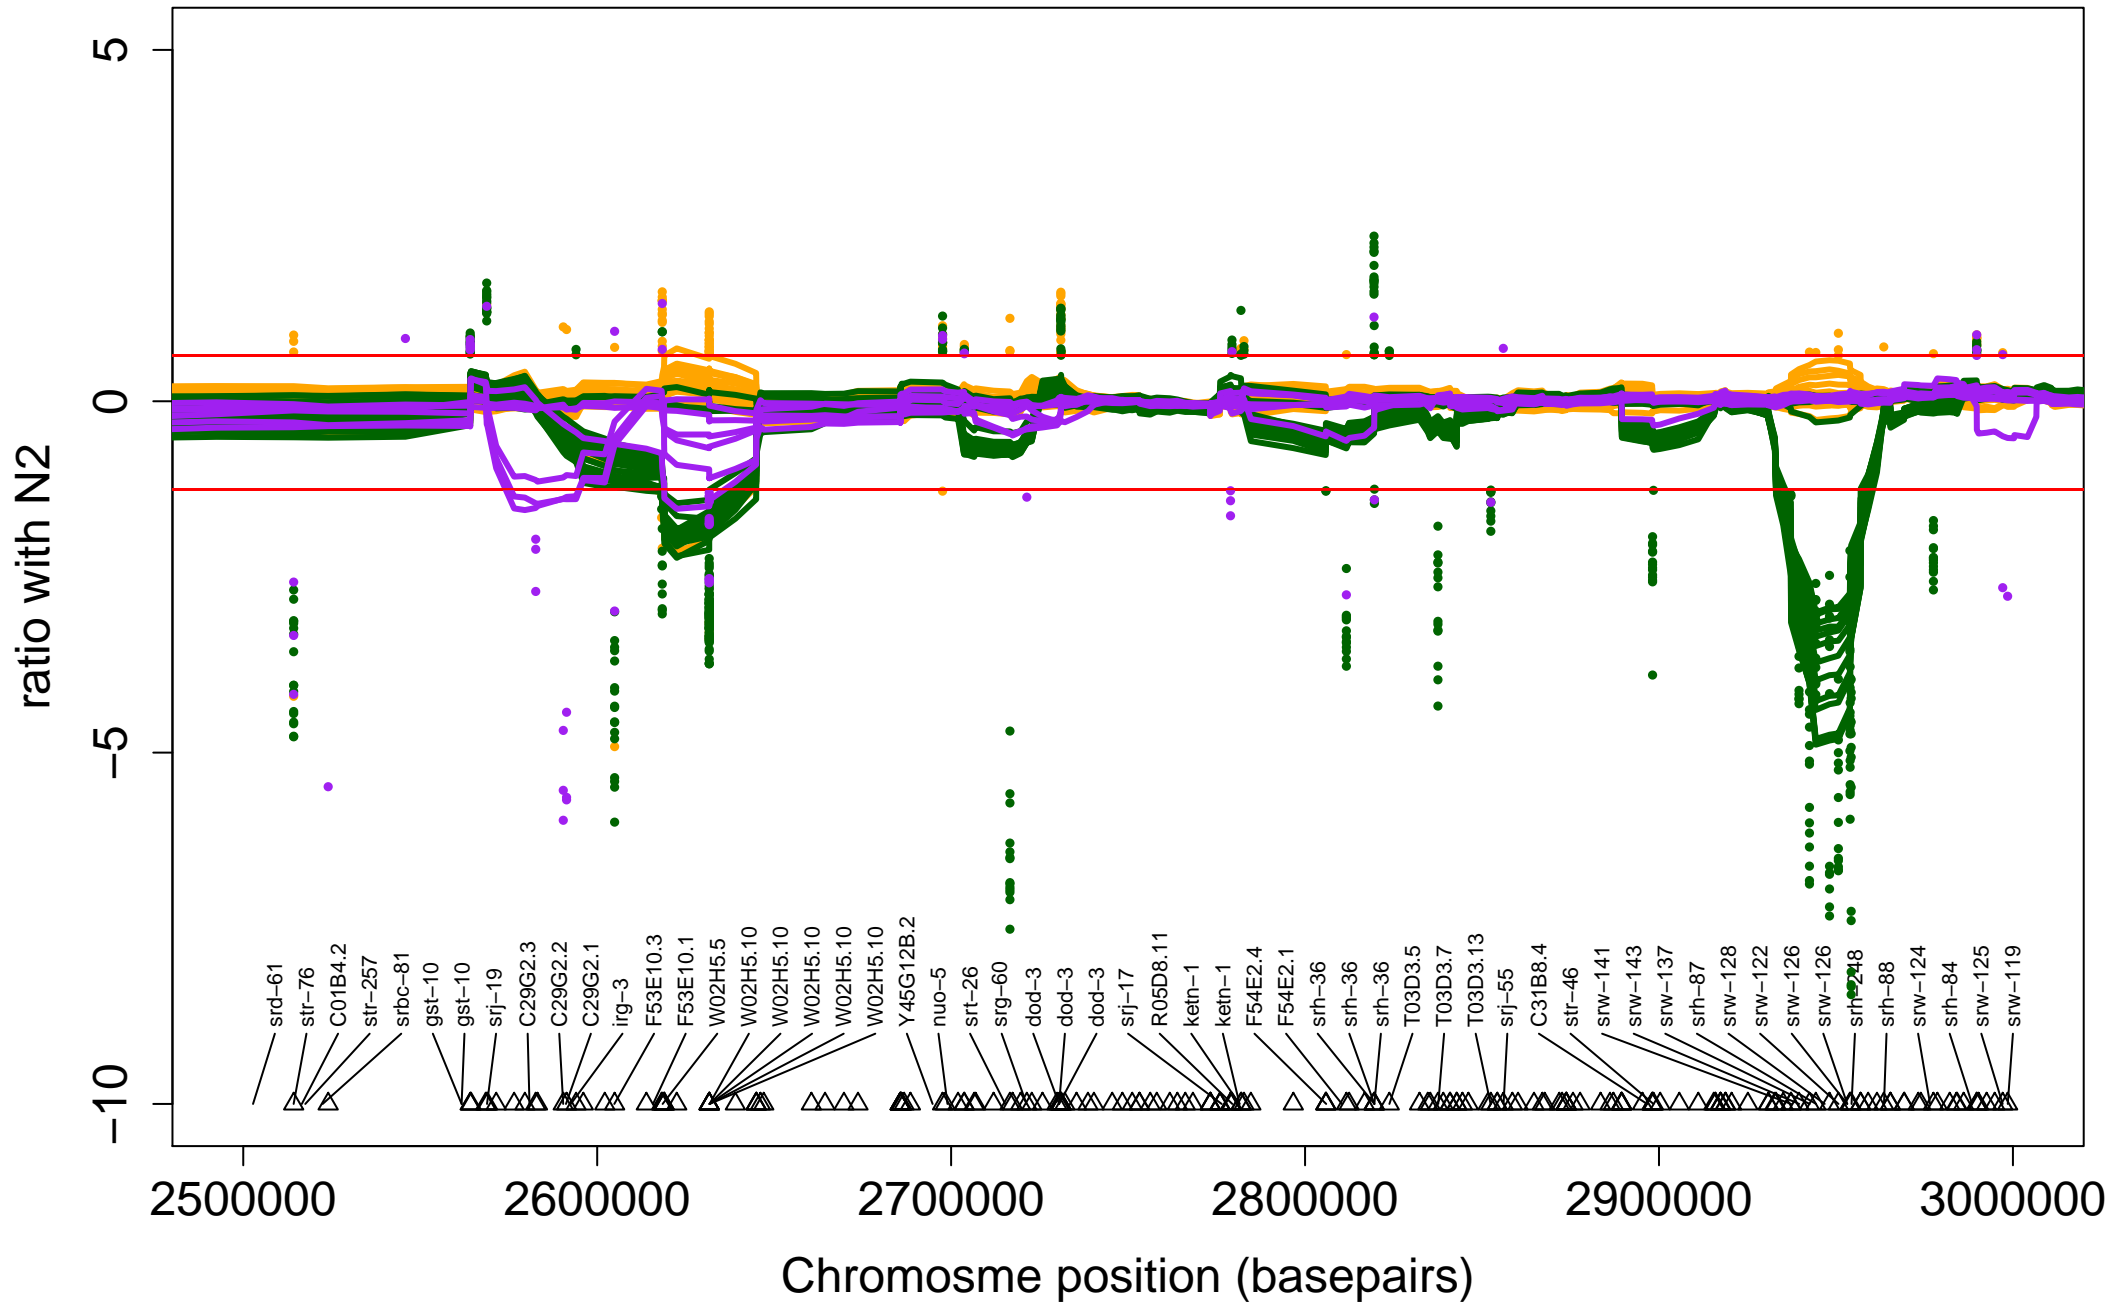

v

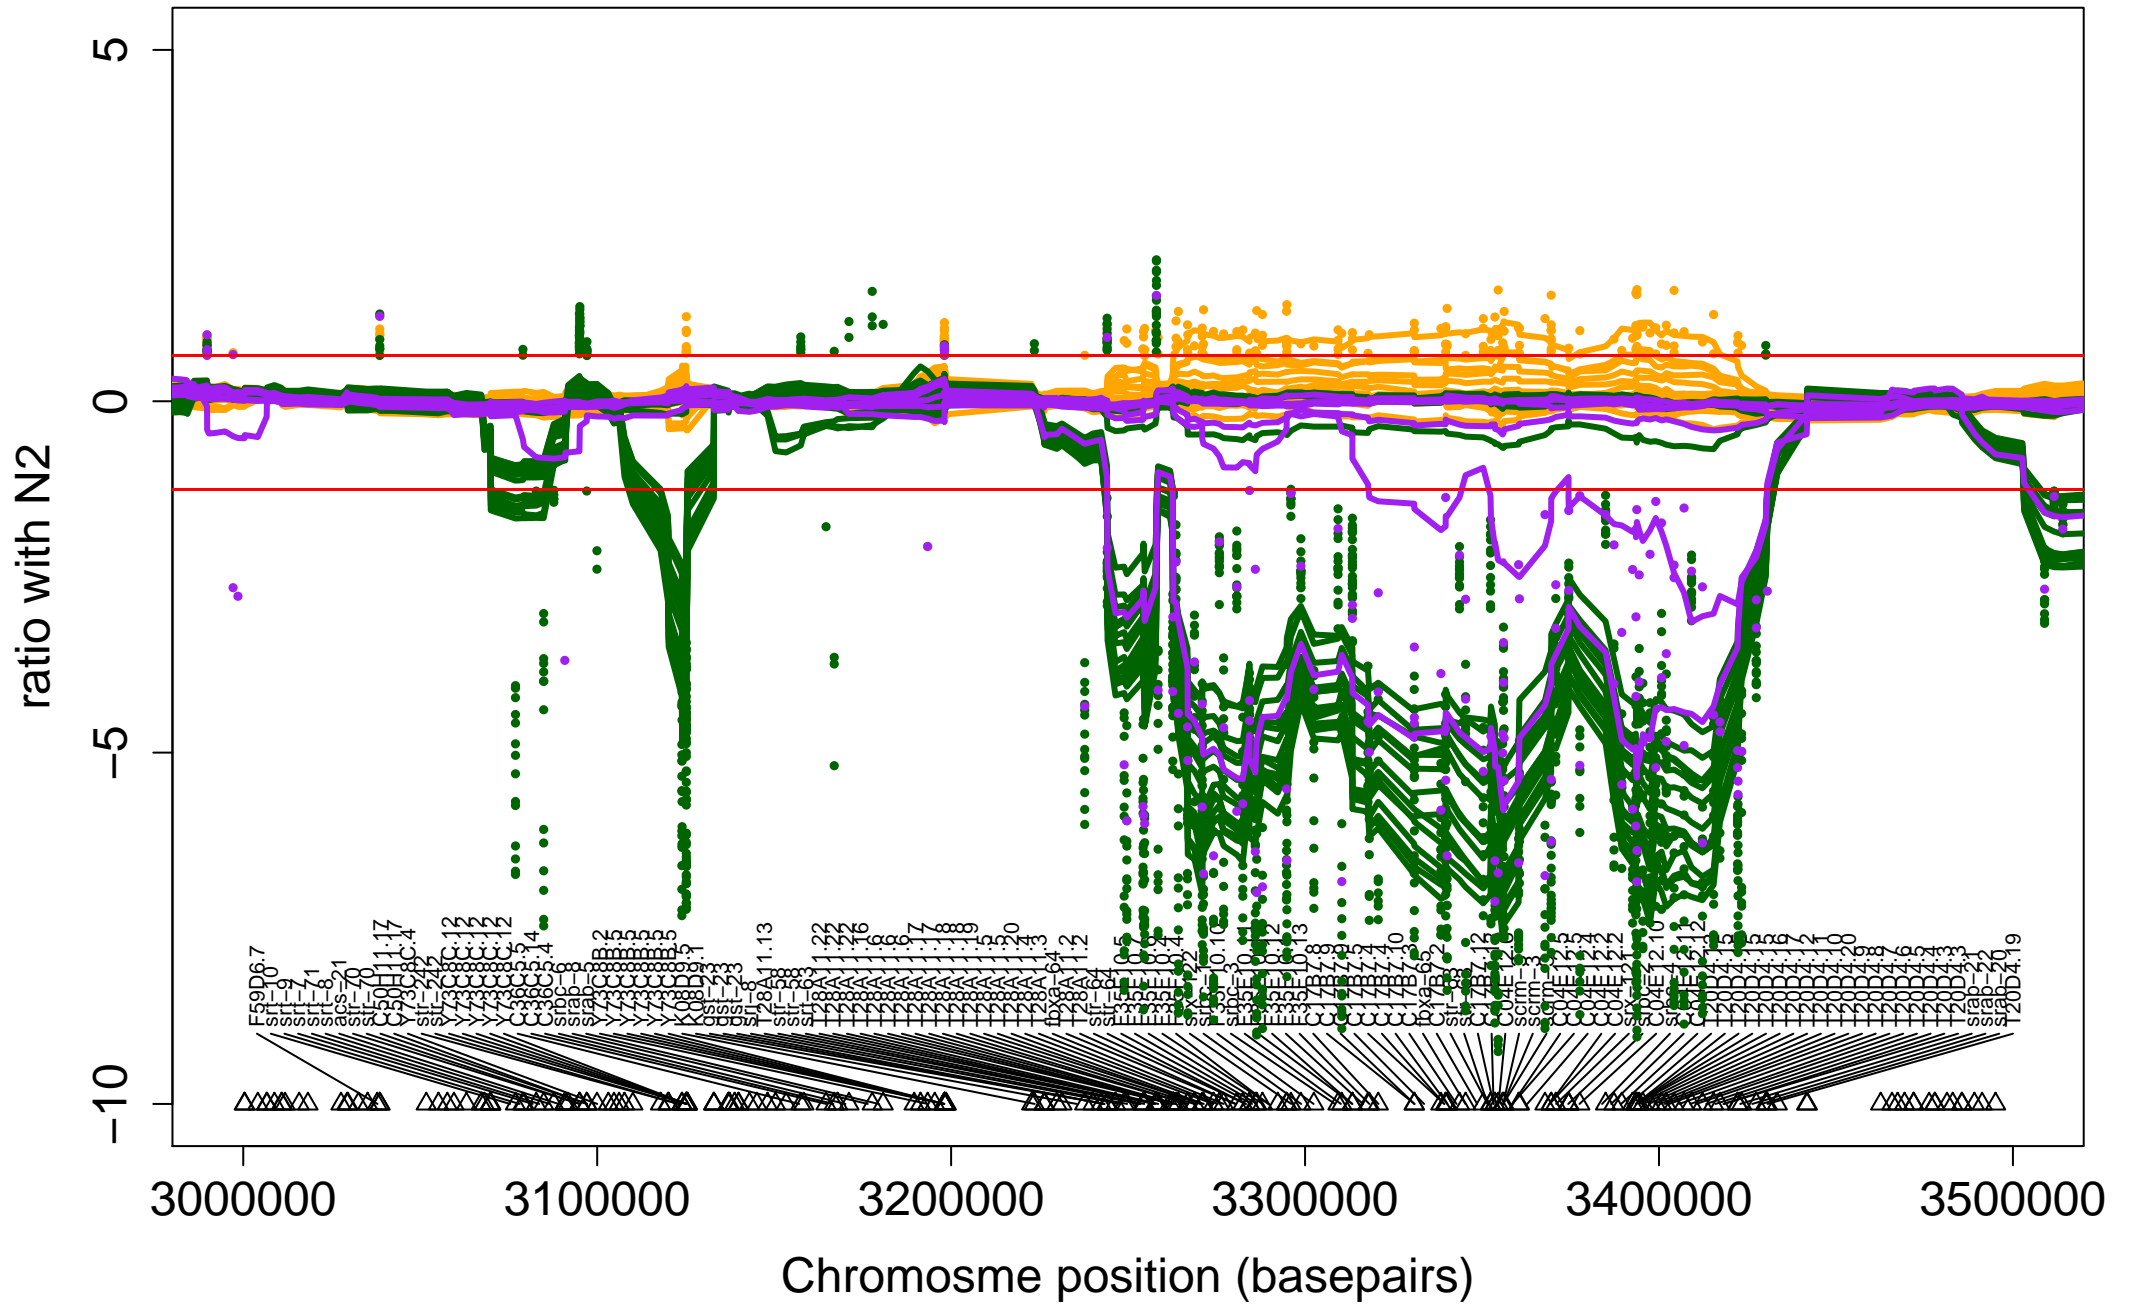

V

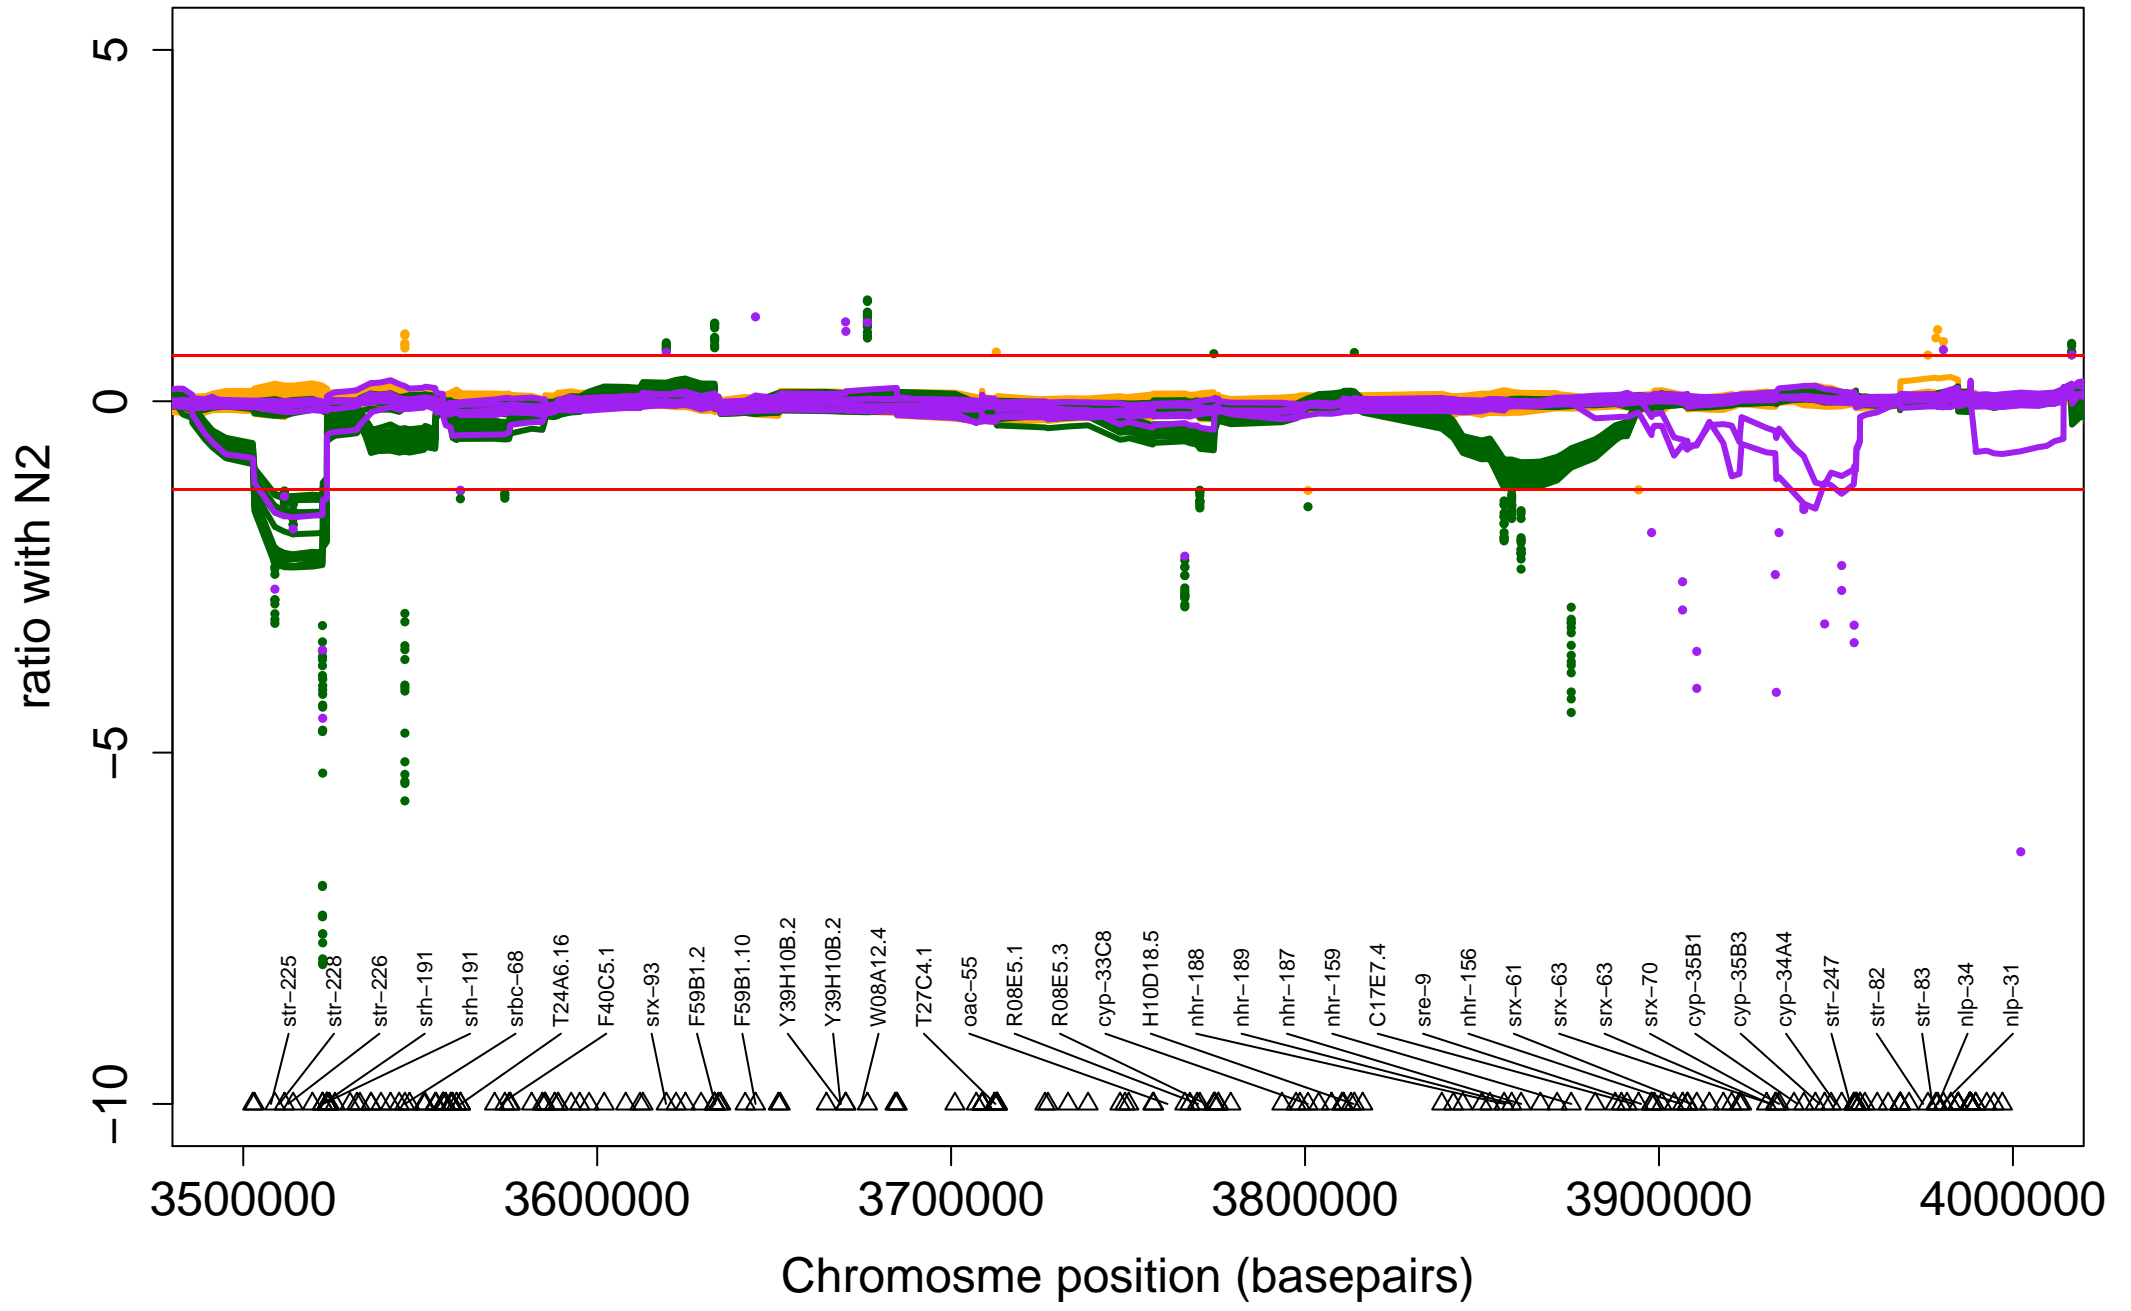



v

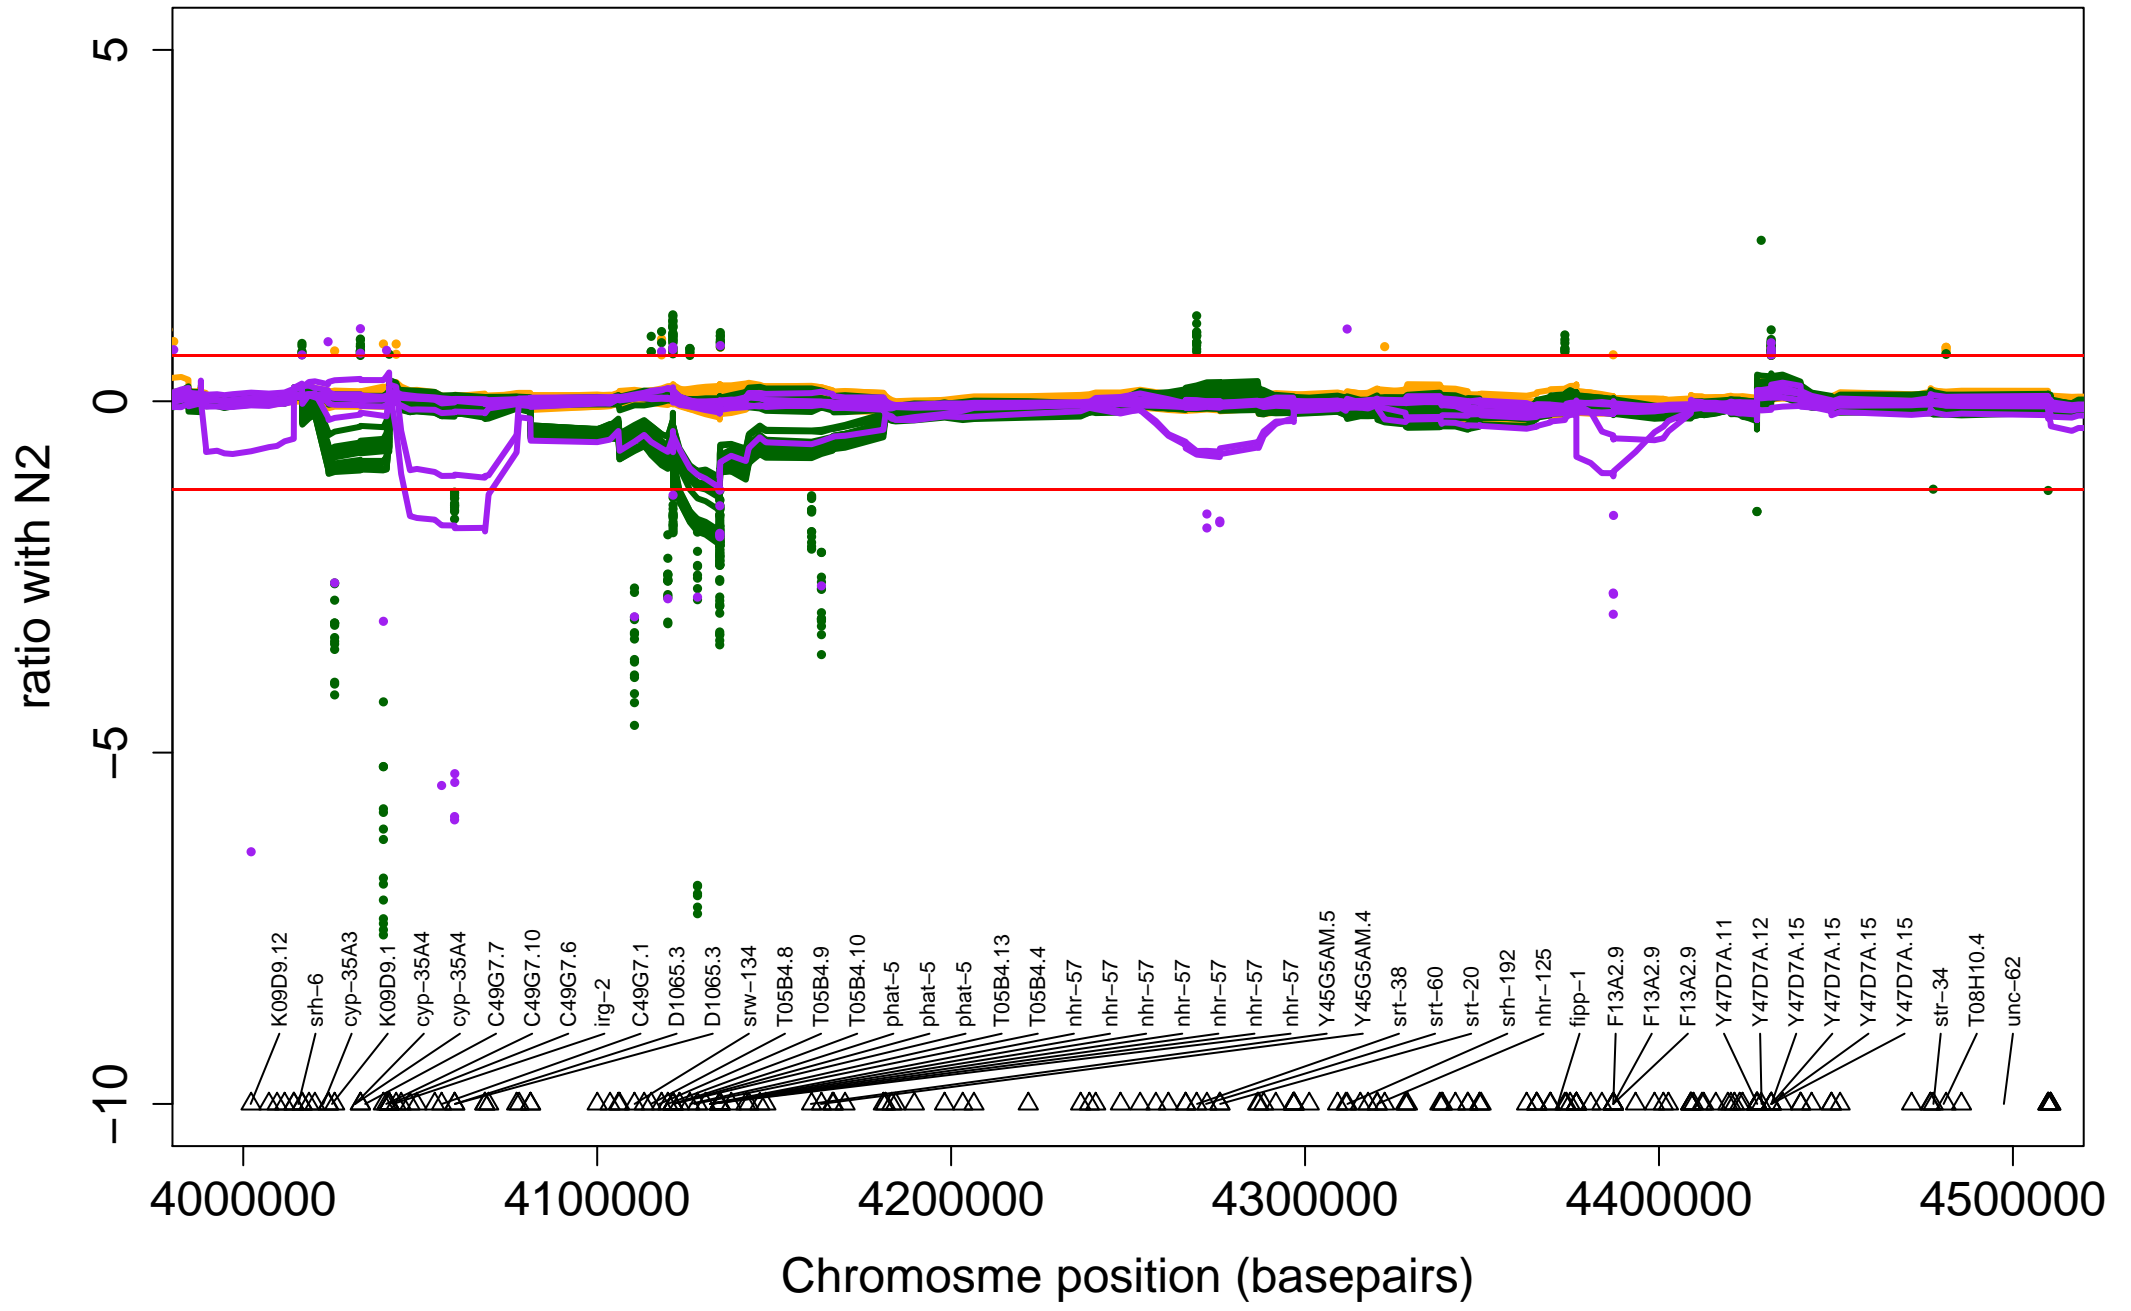

v

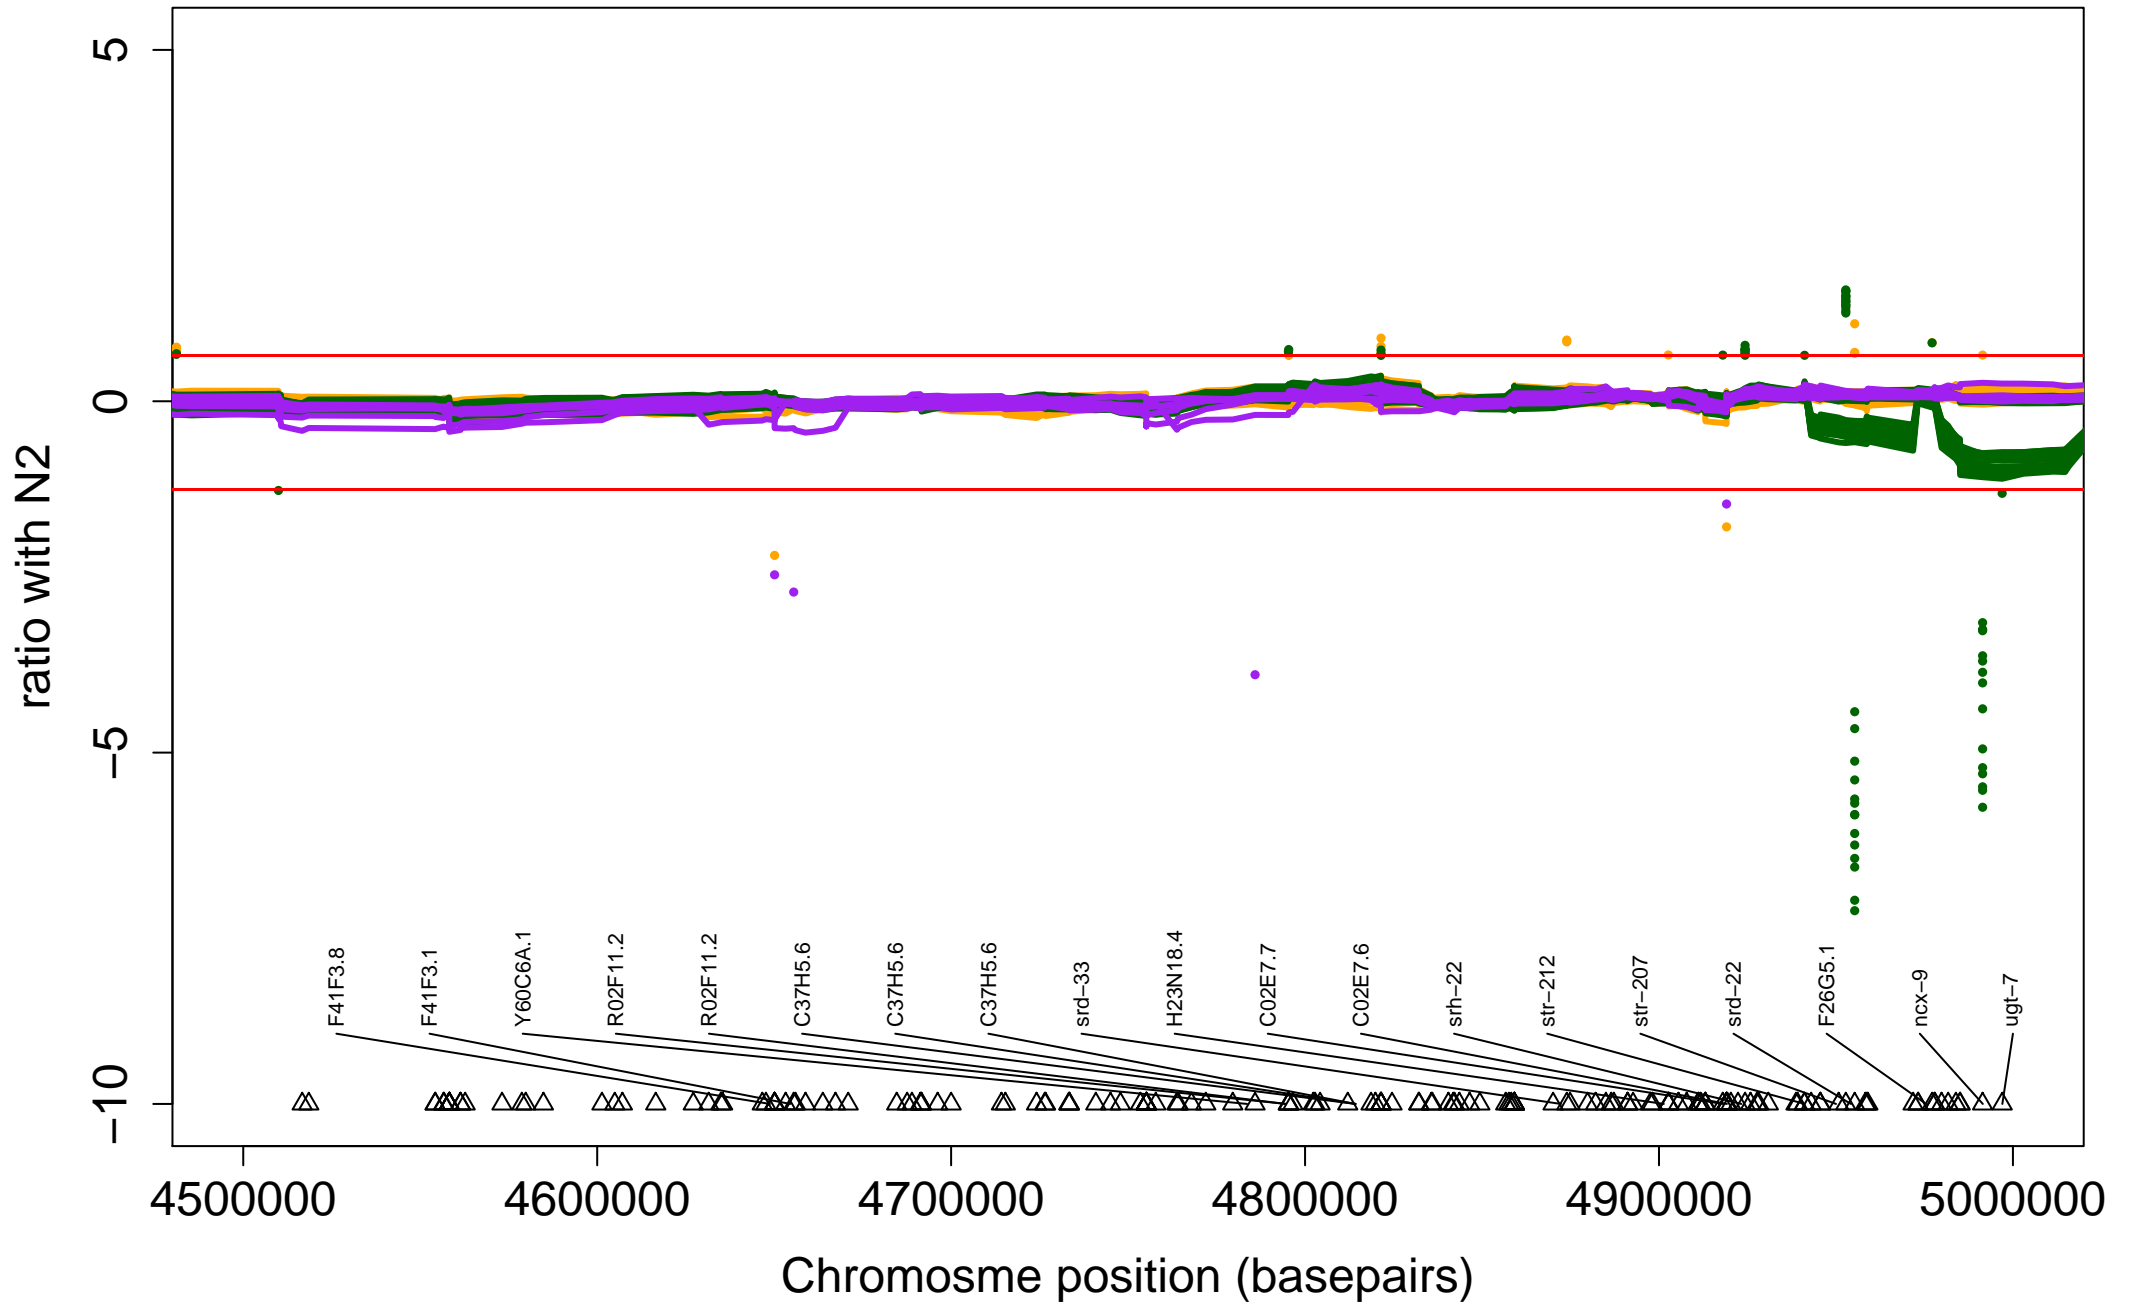

v

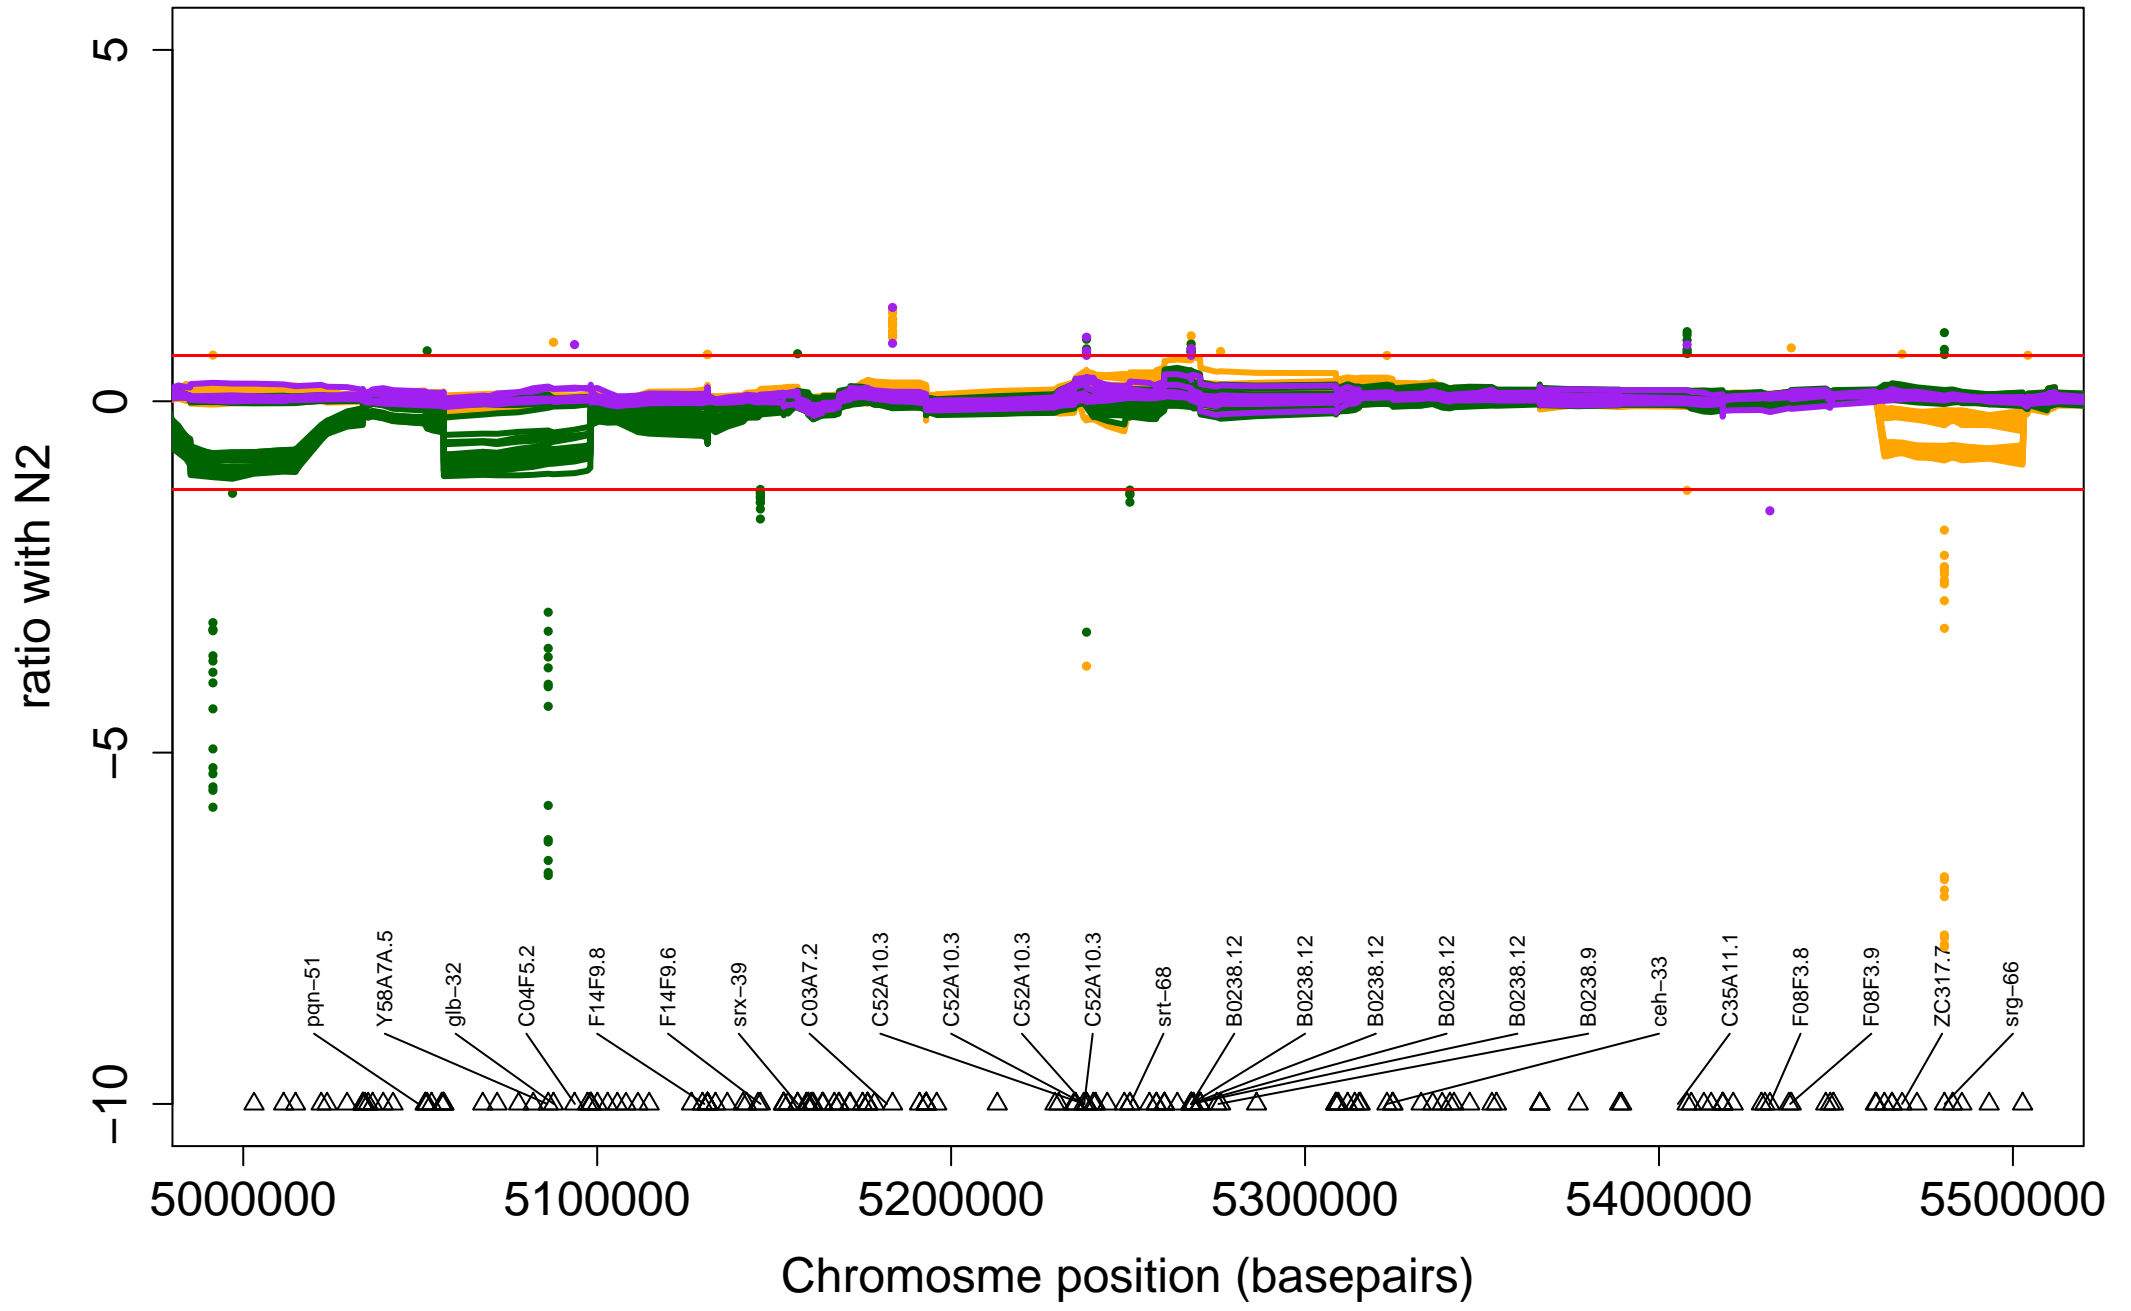

v

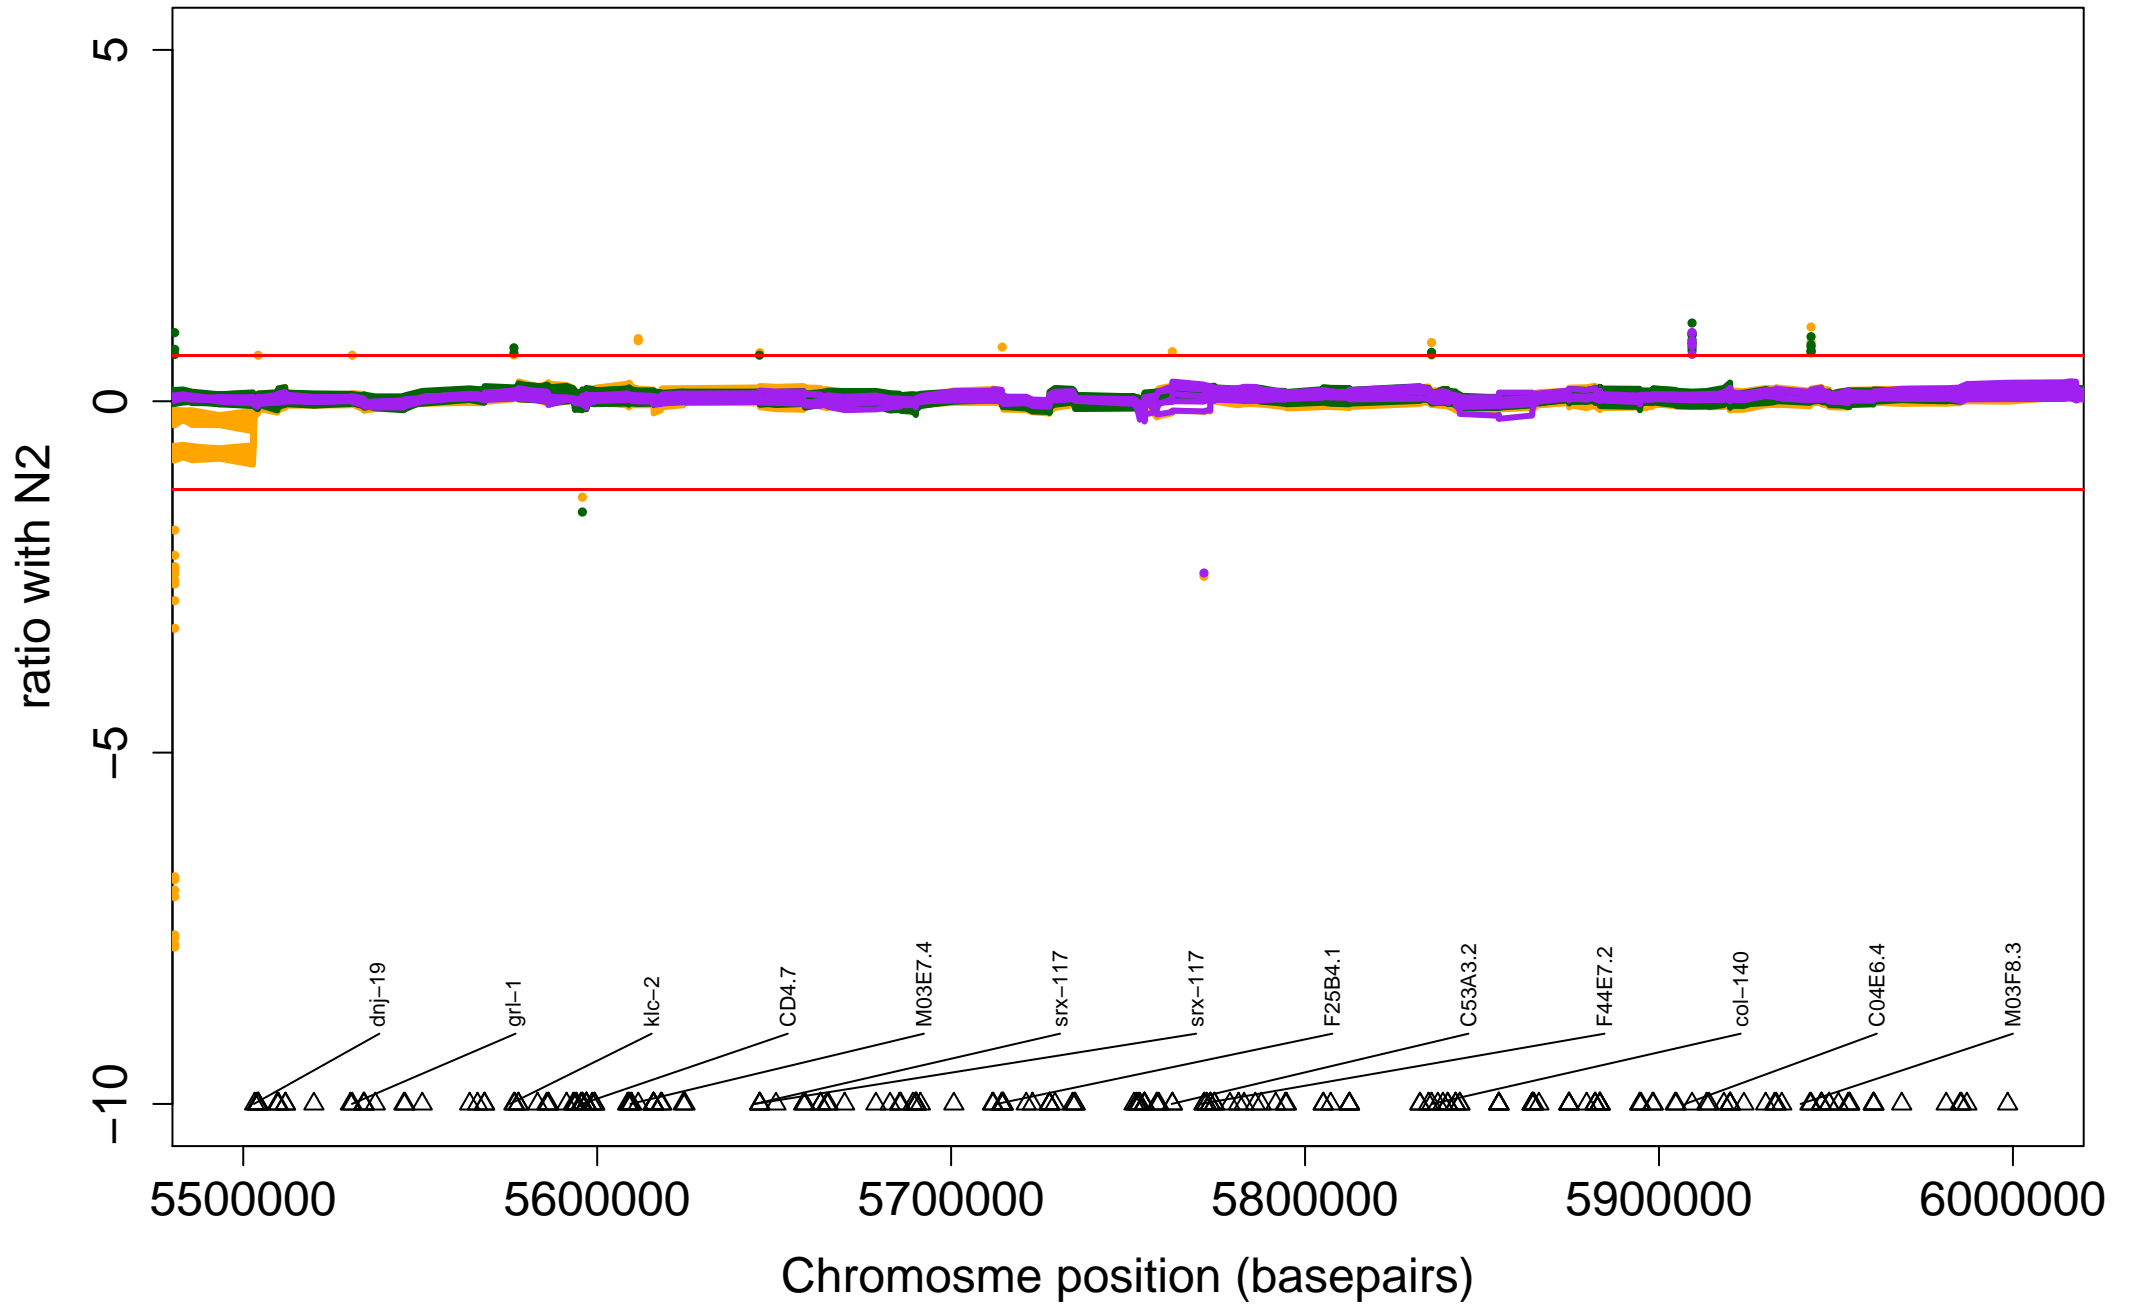

V

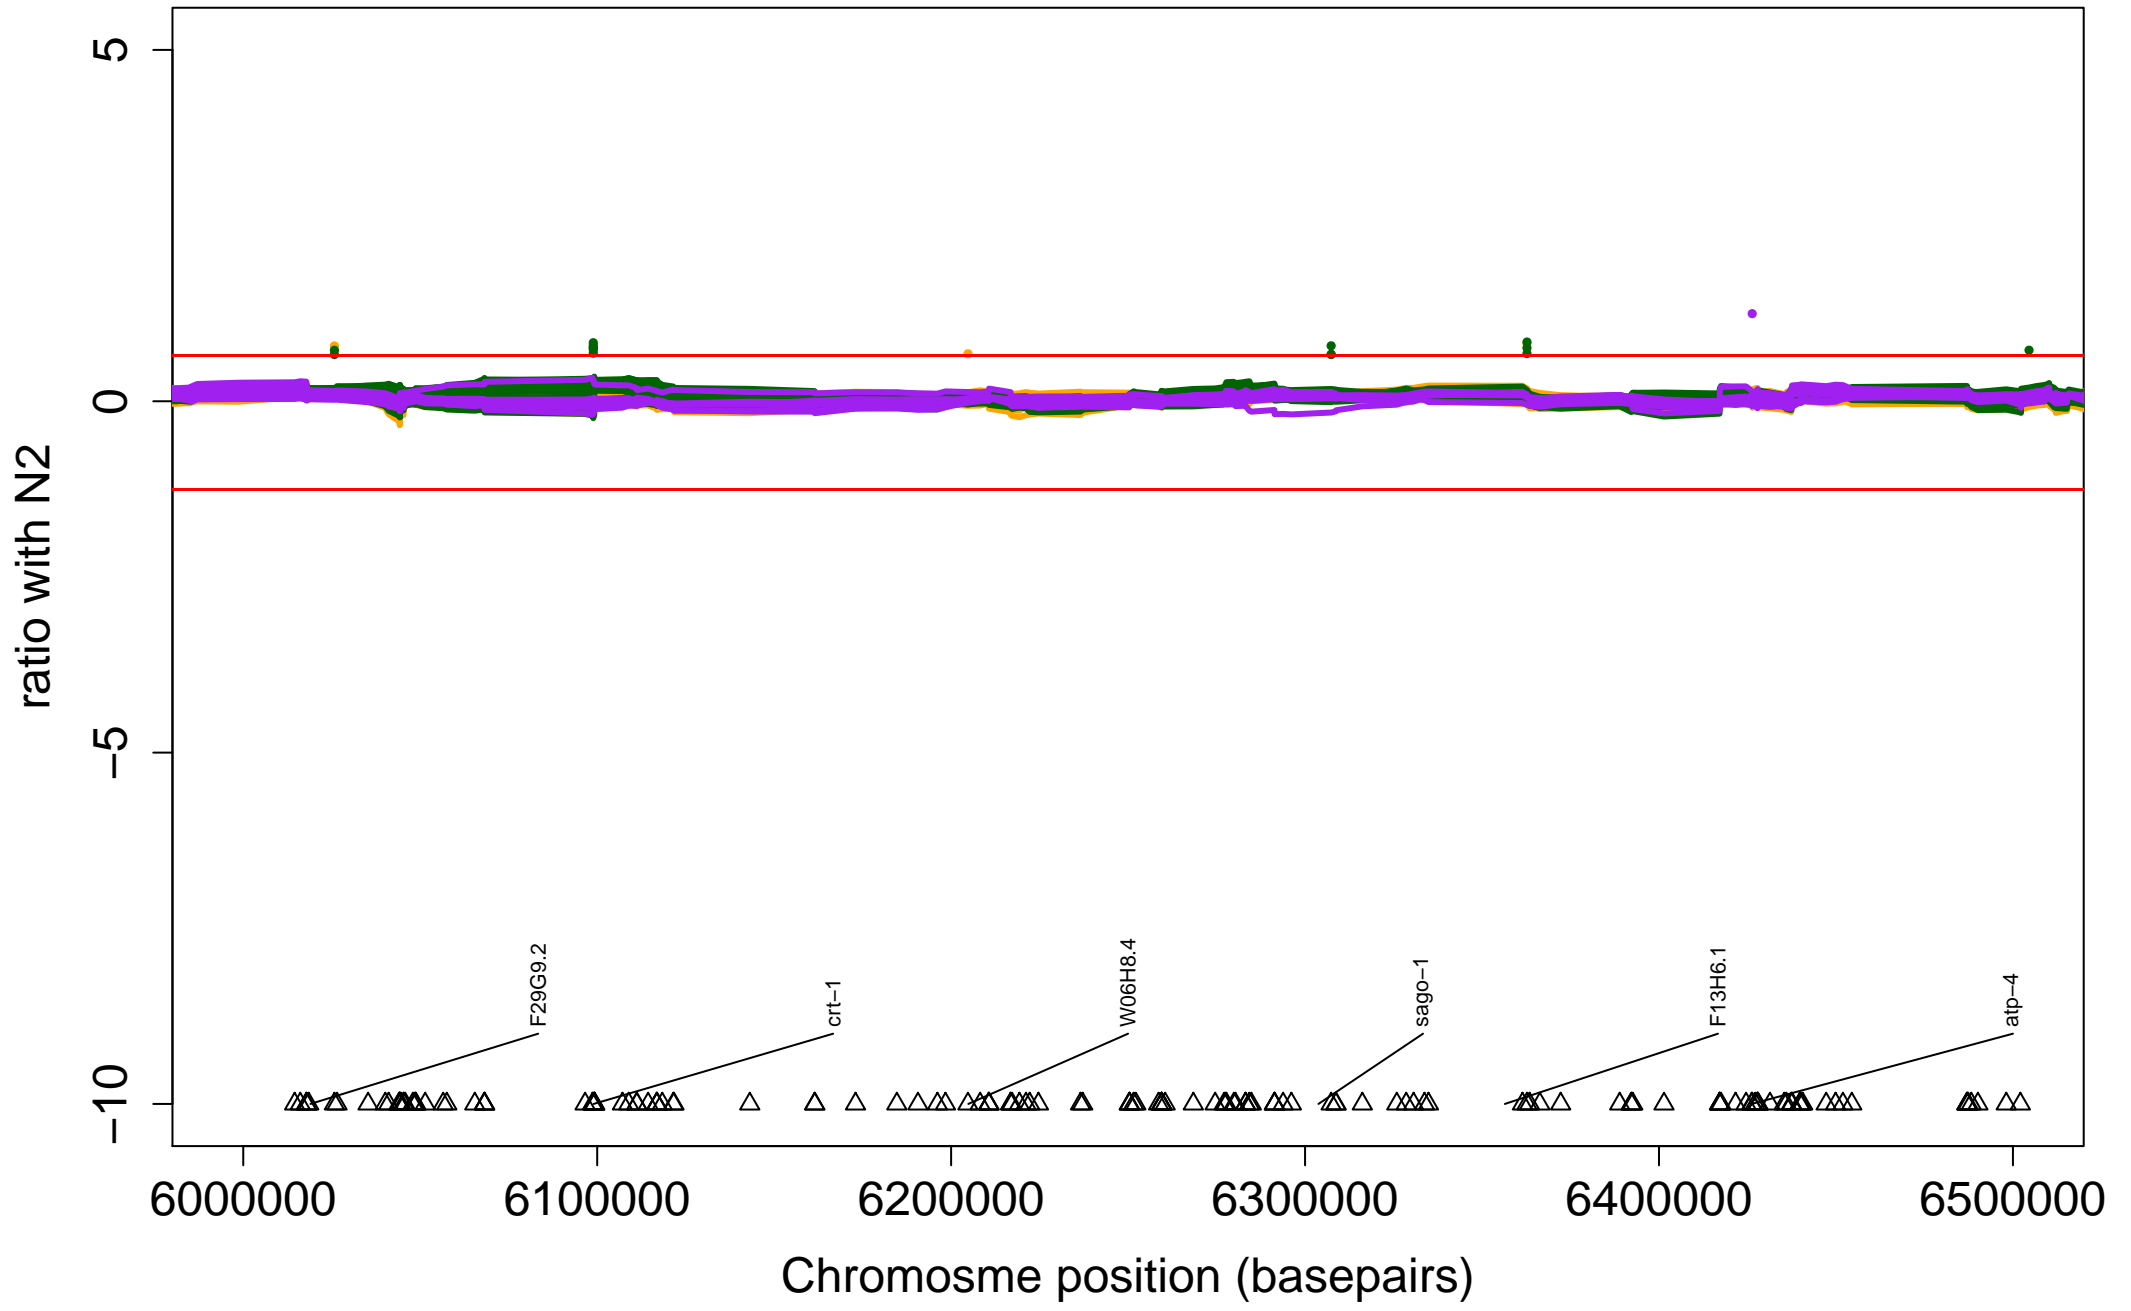

v

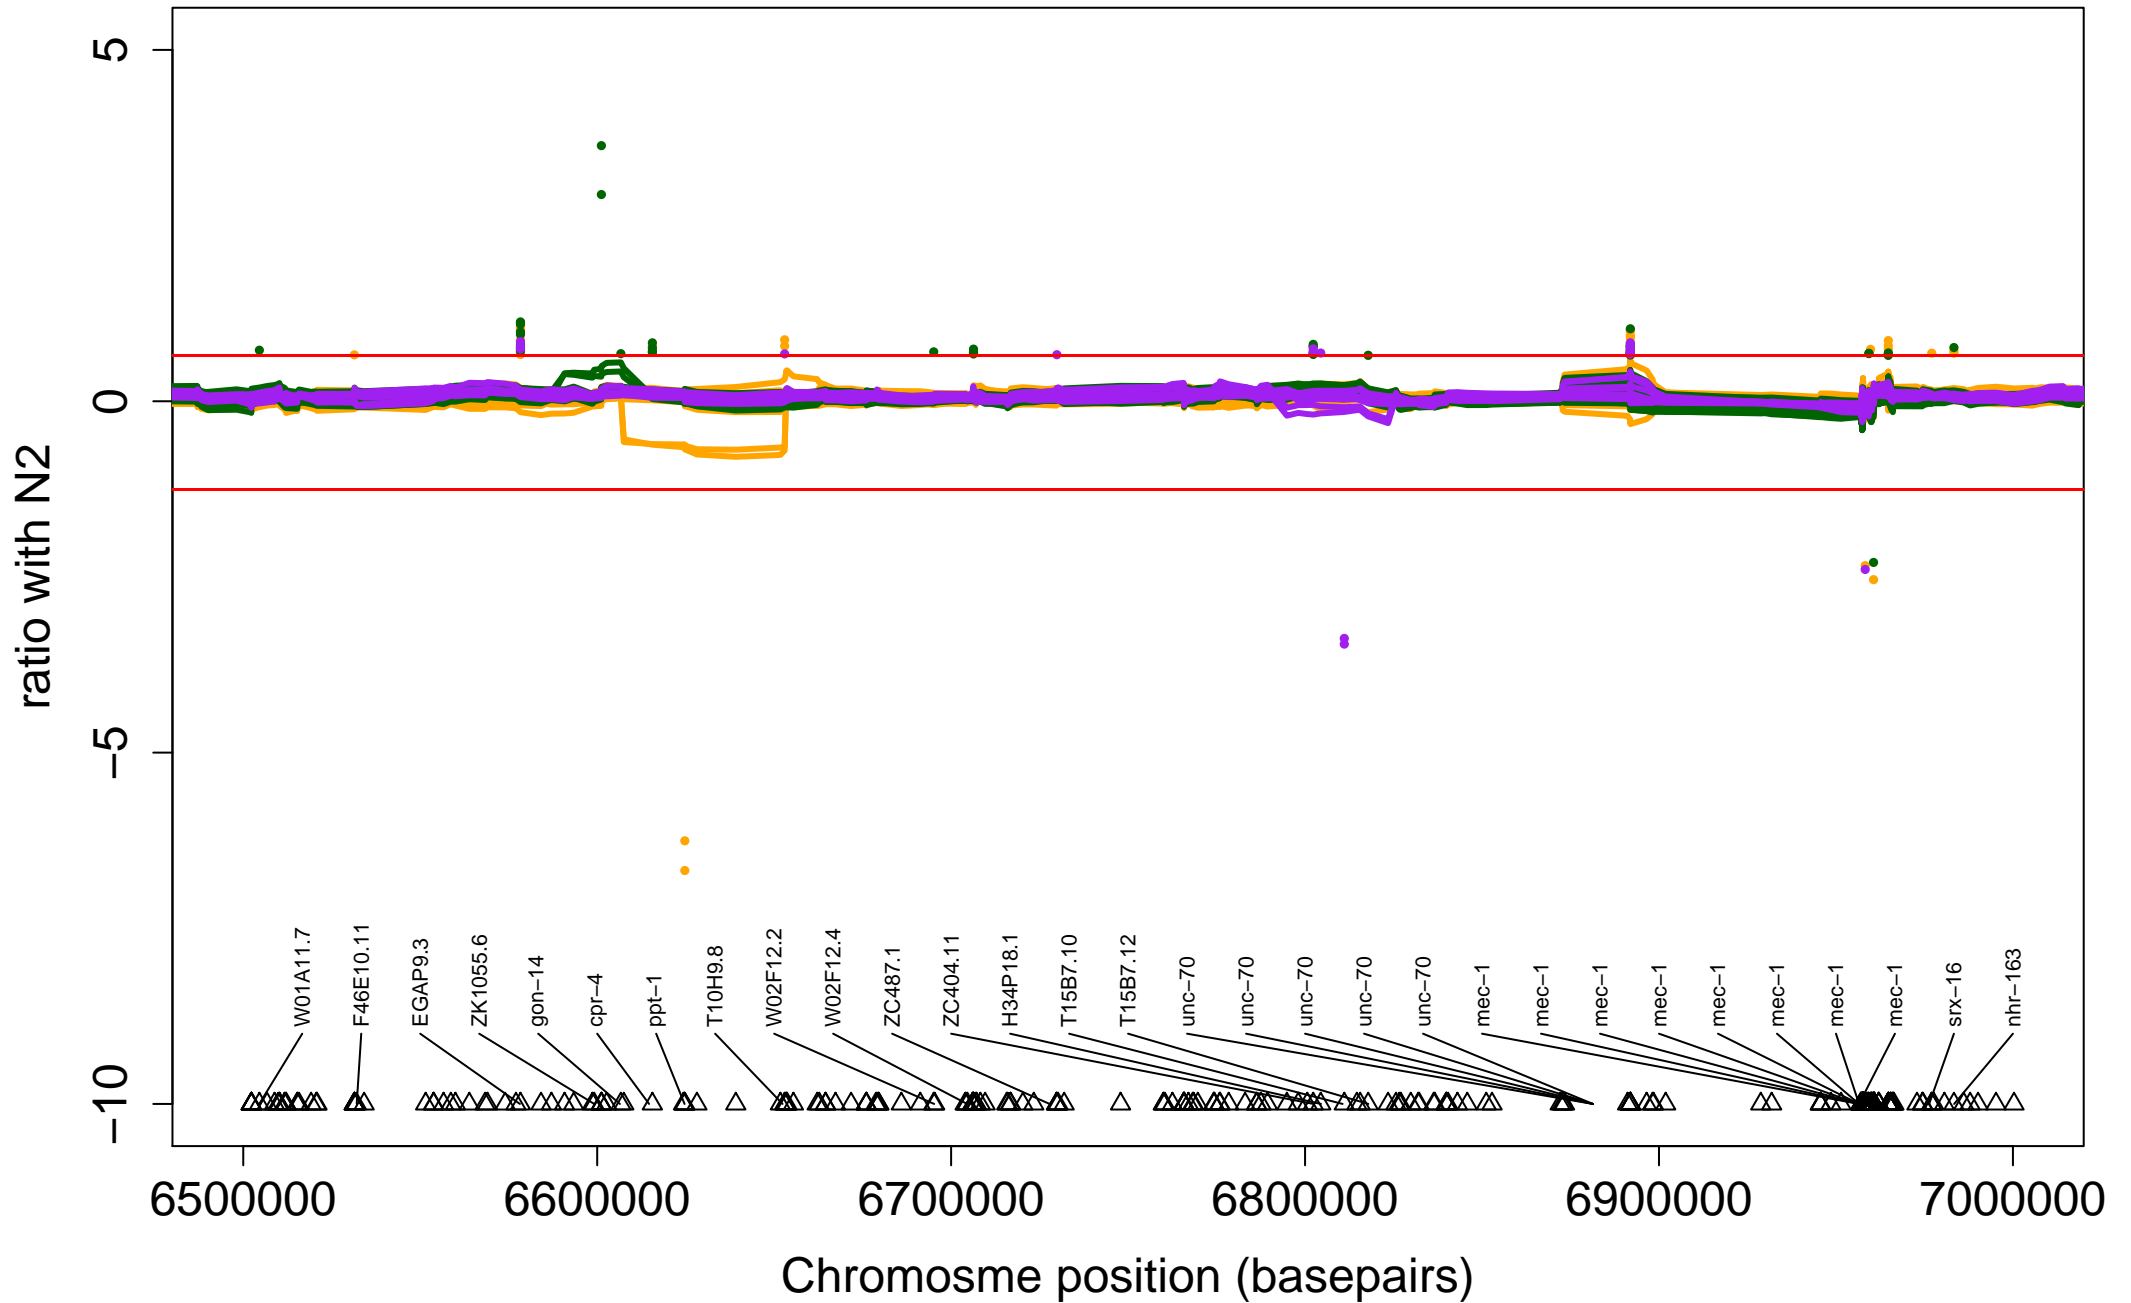

v

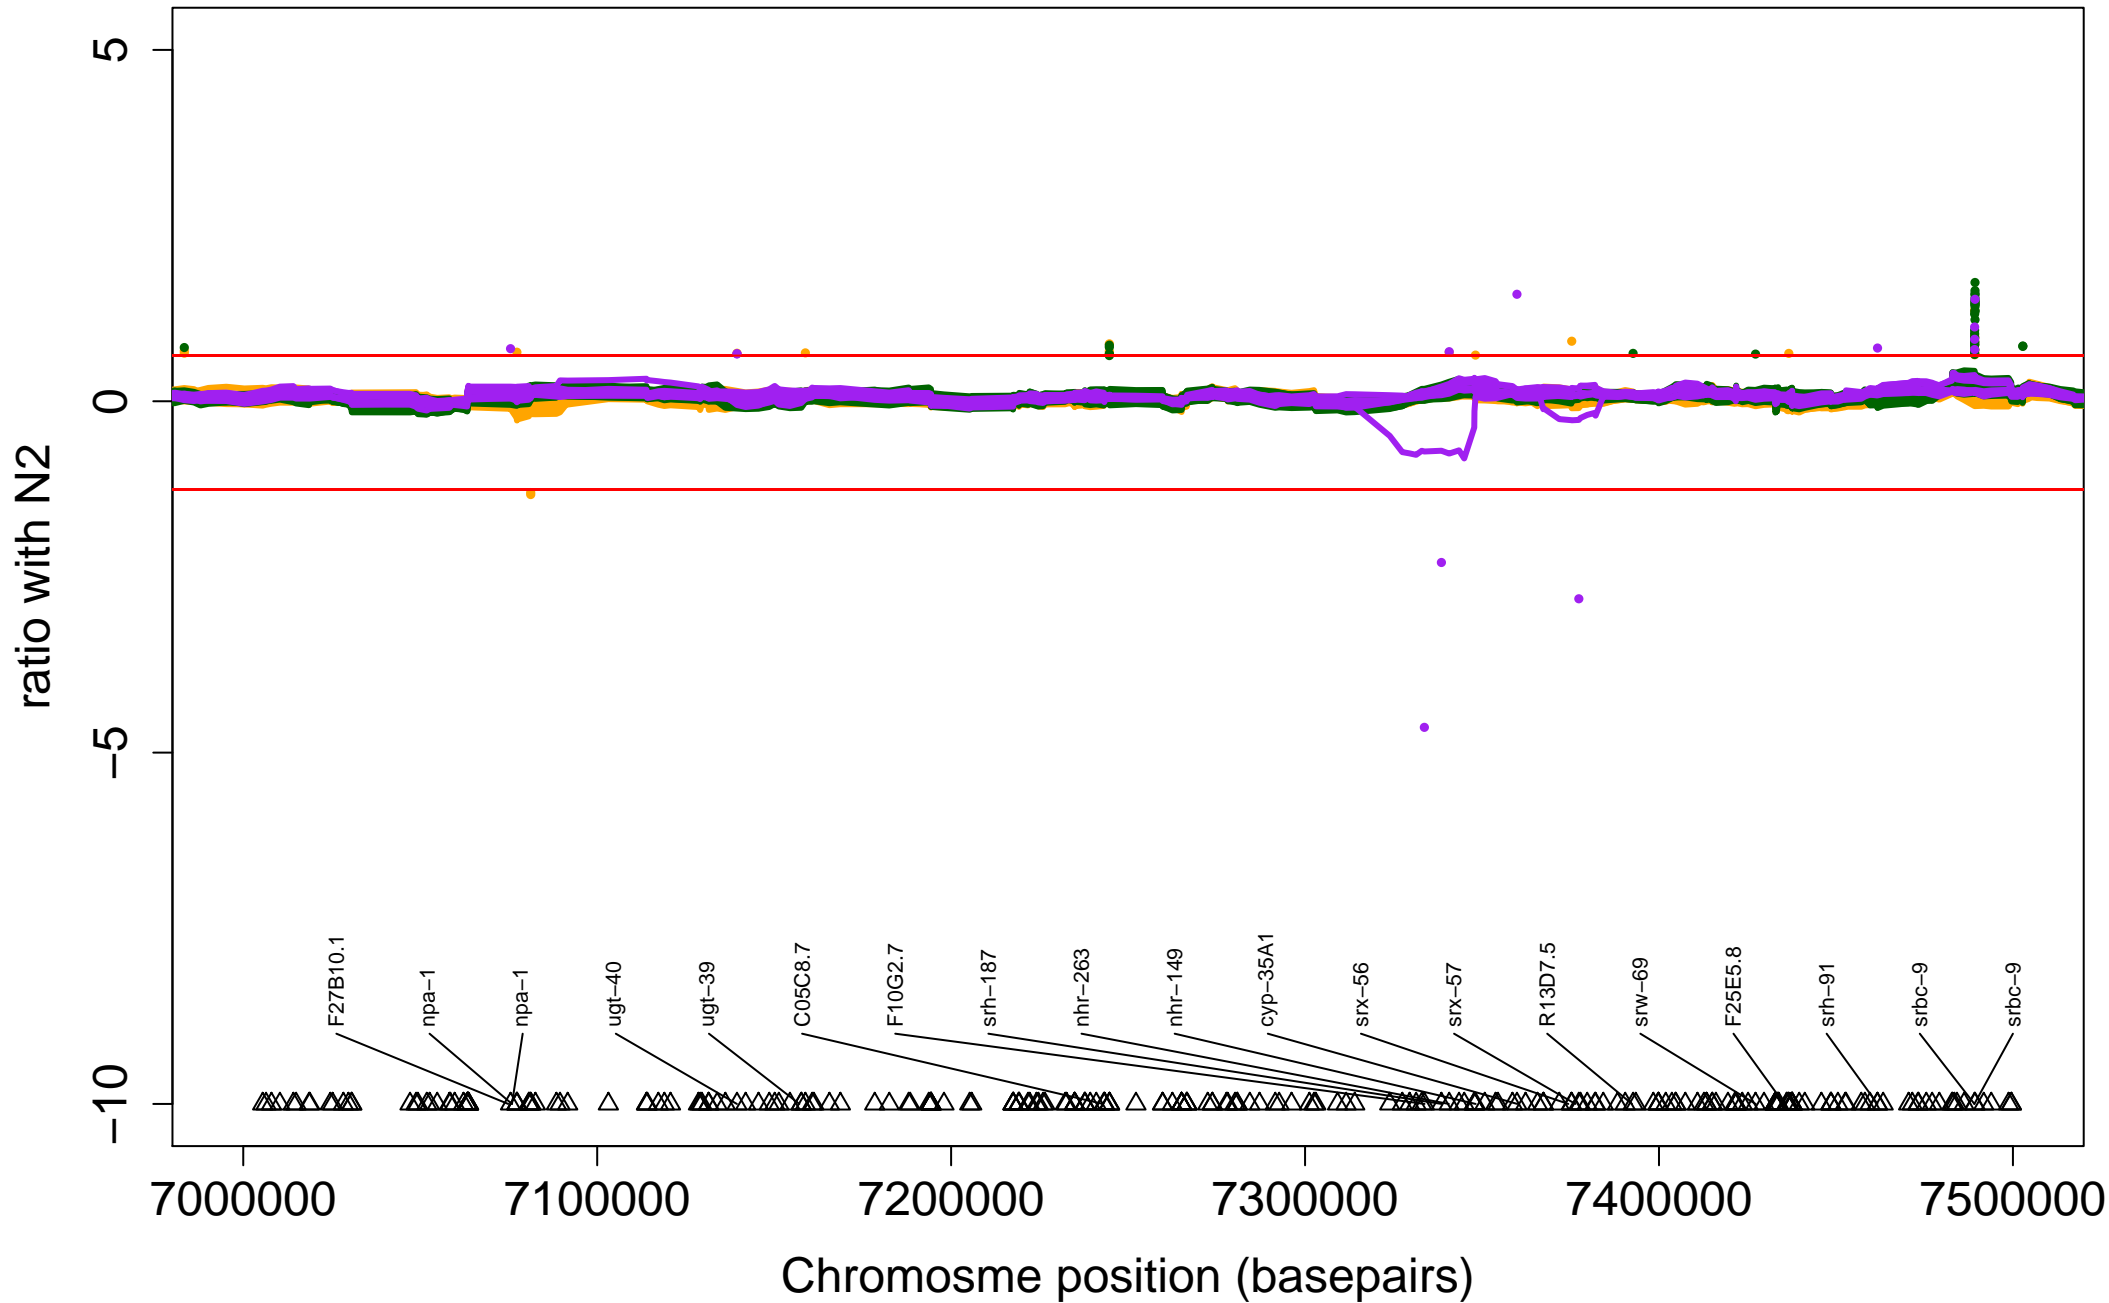

V

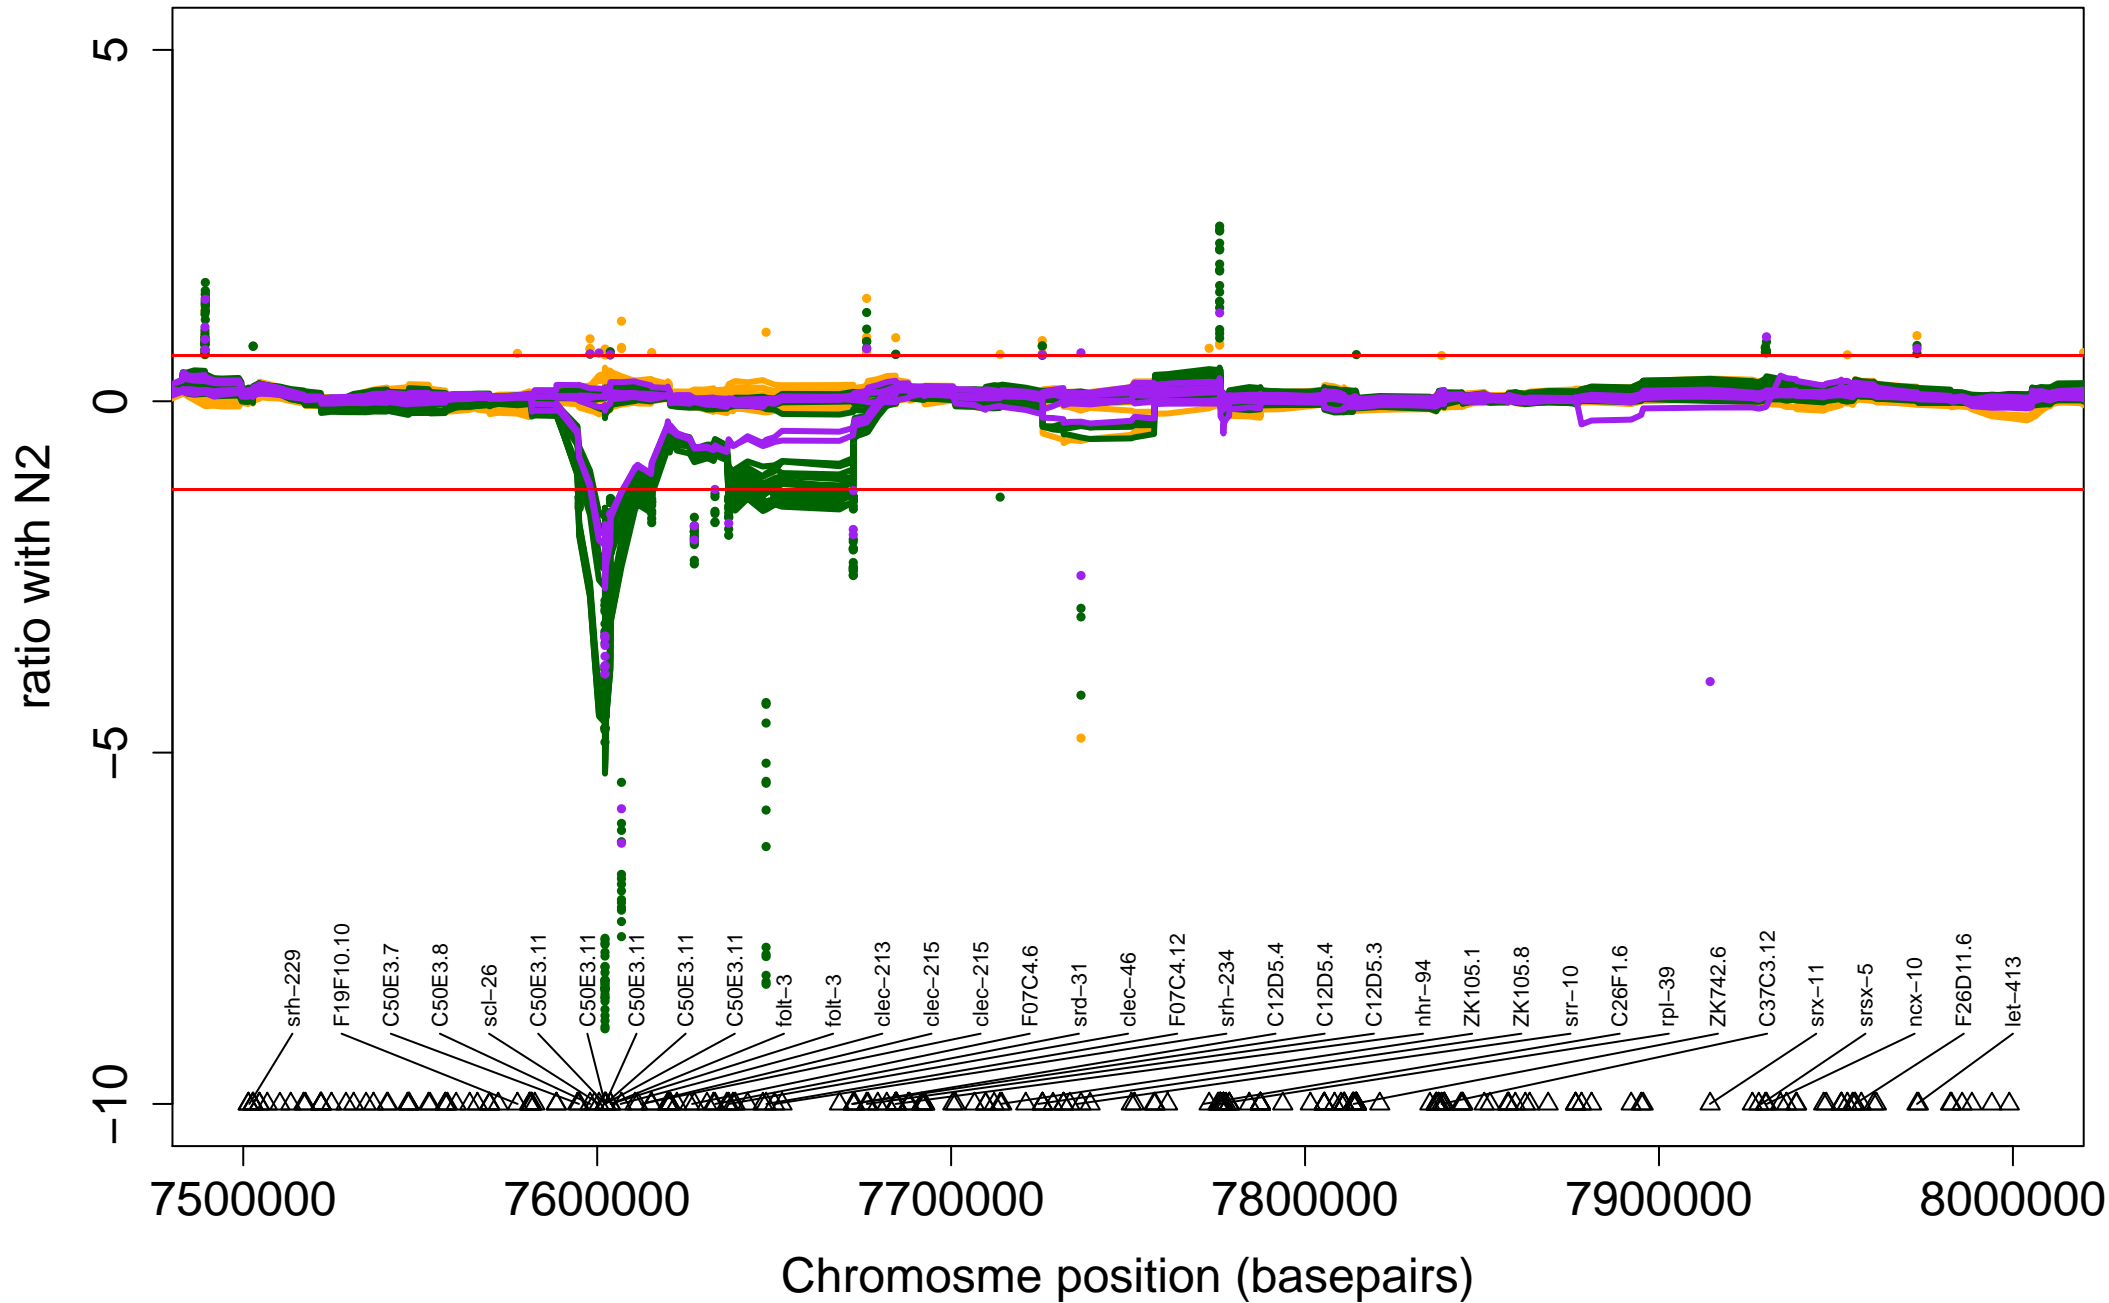



v

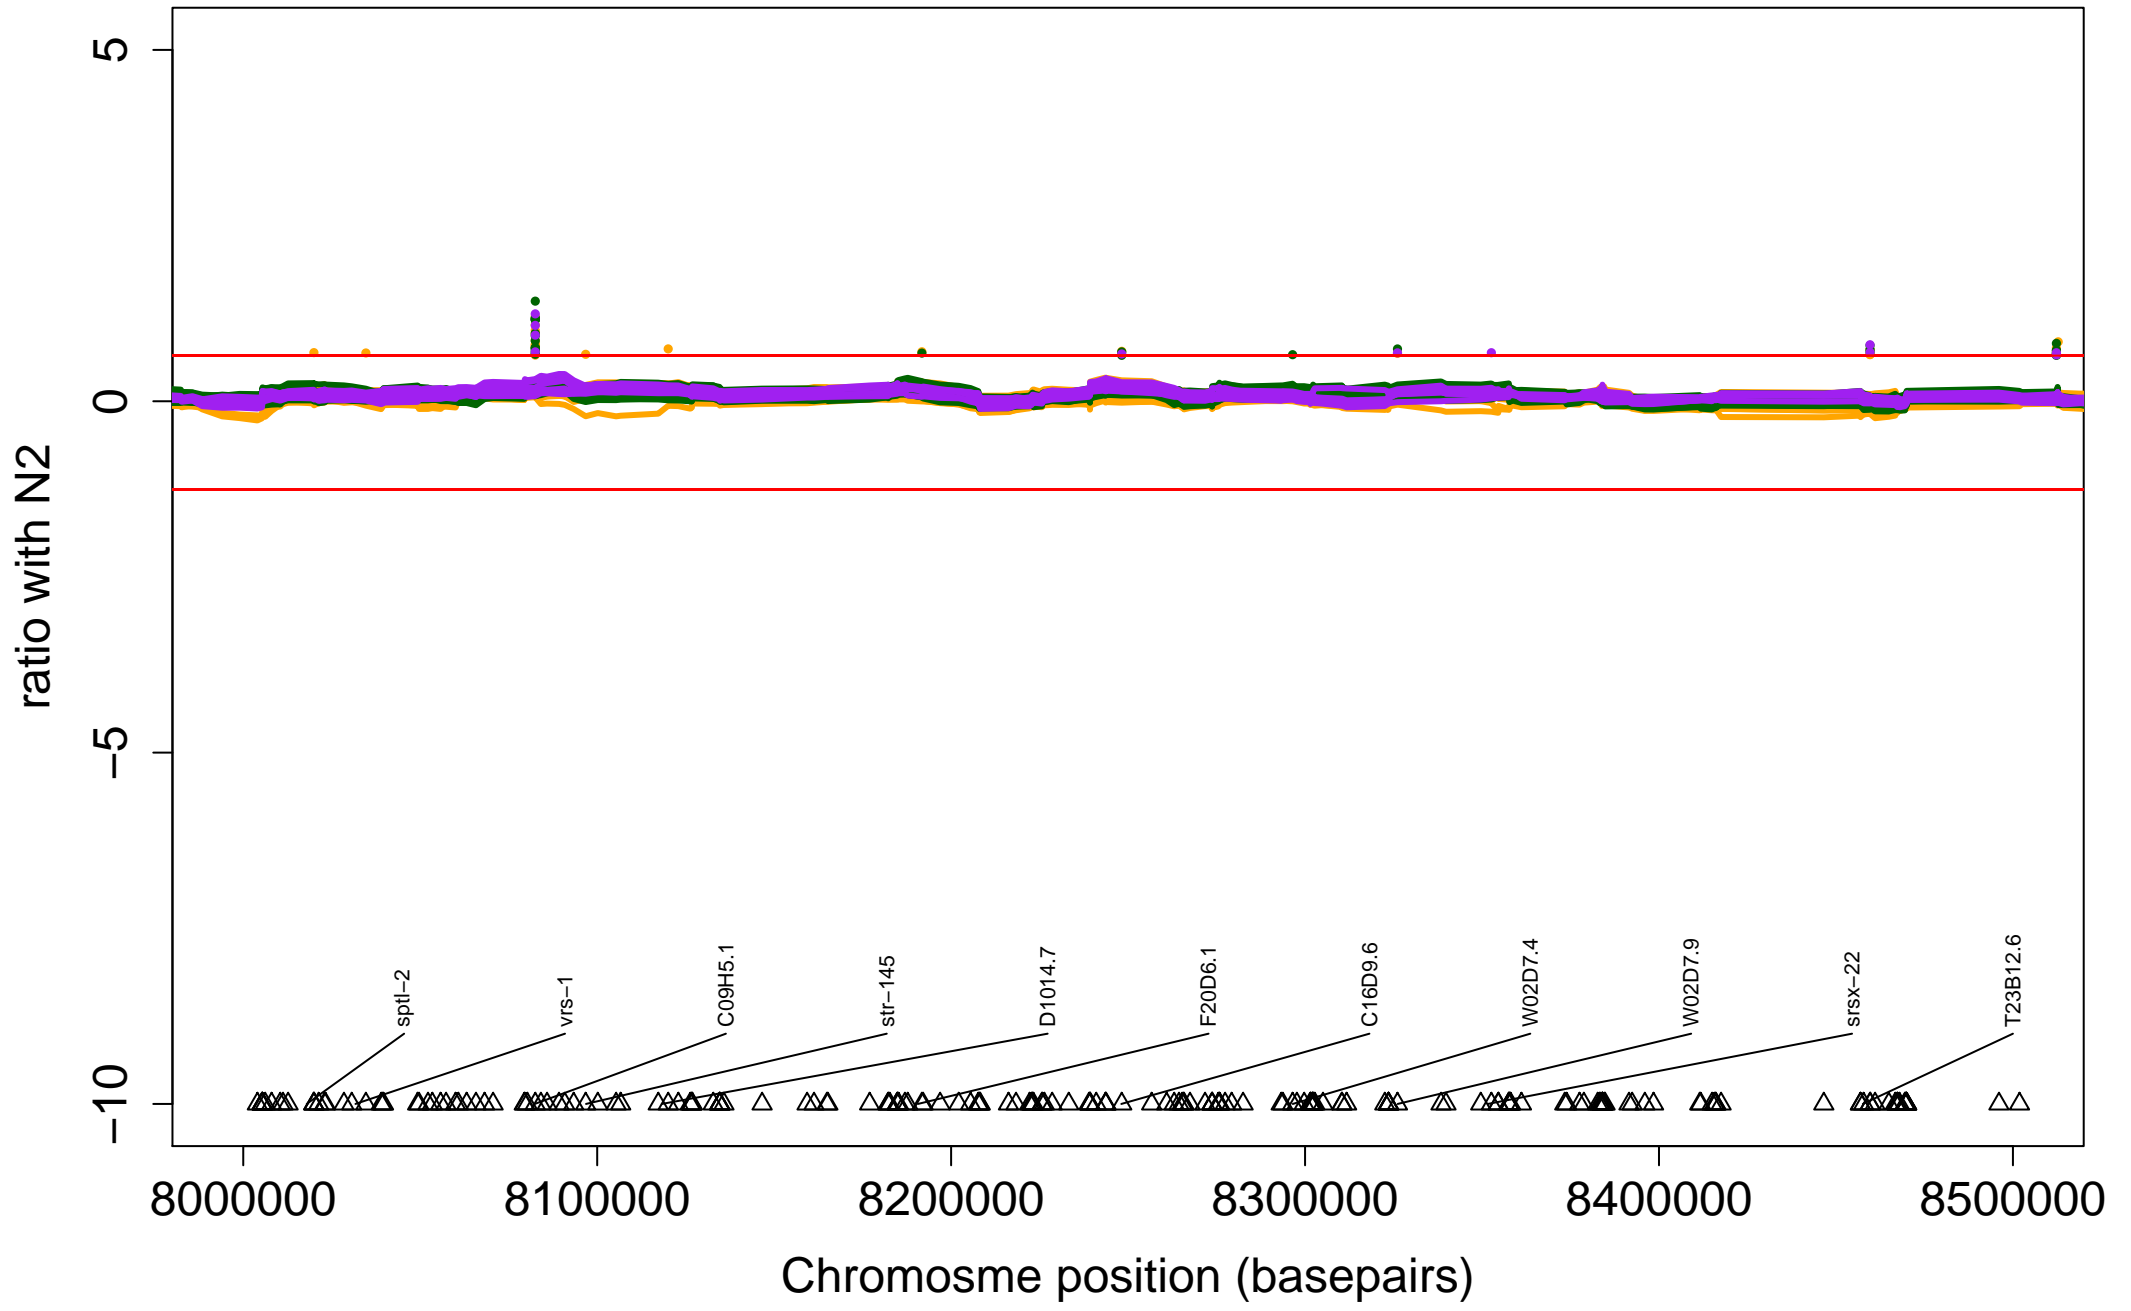

v

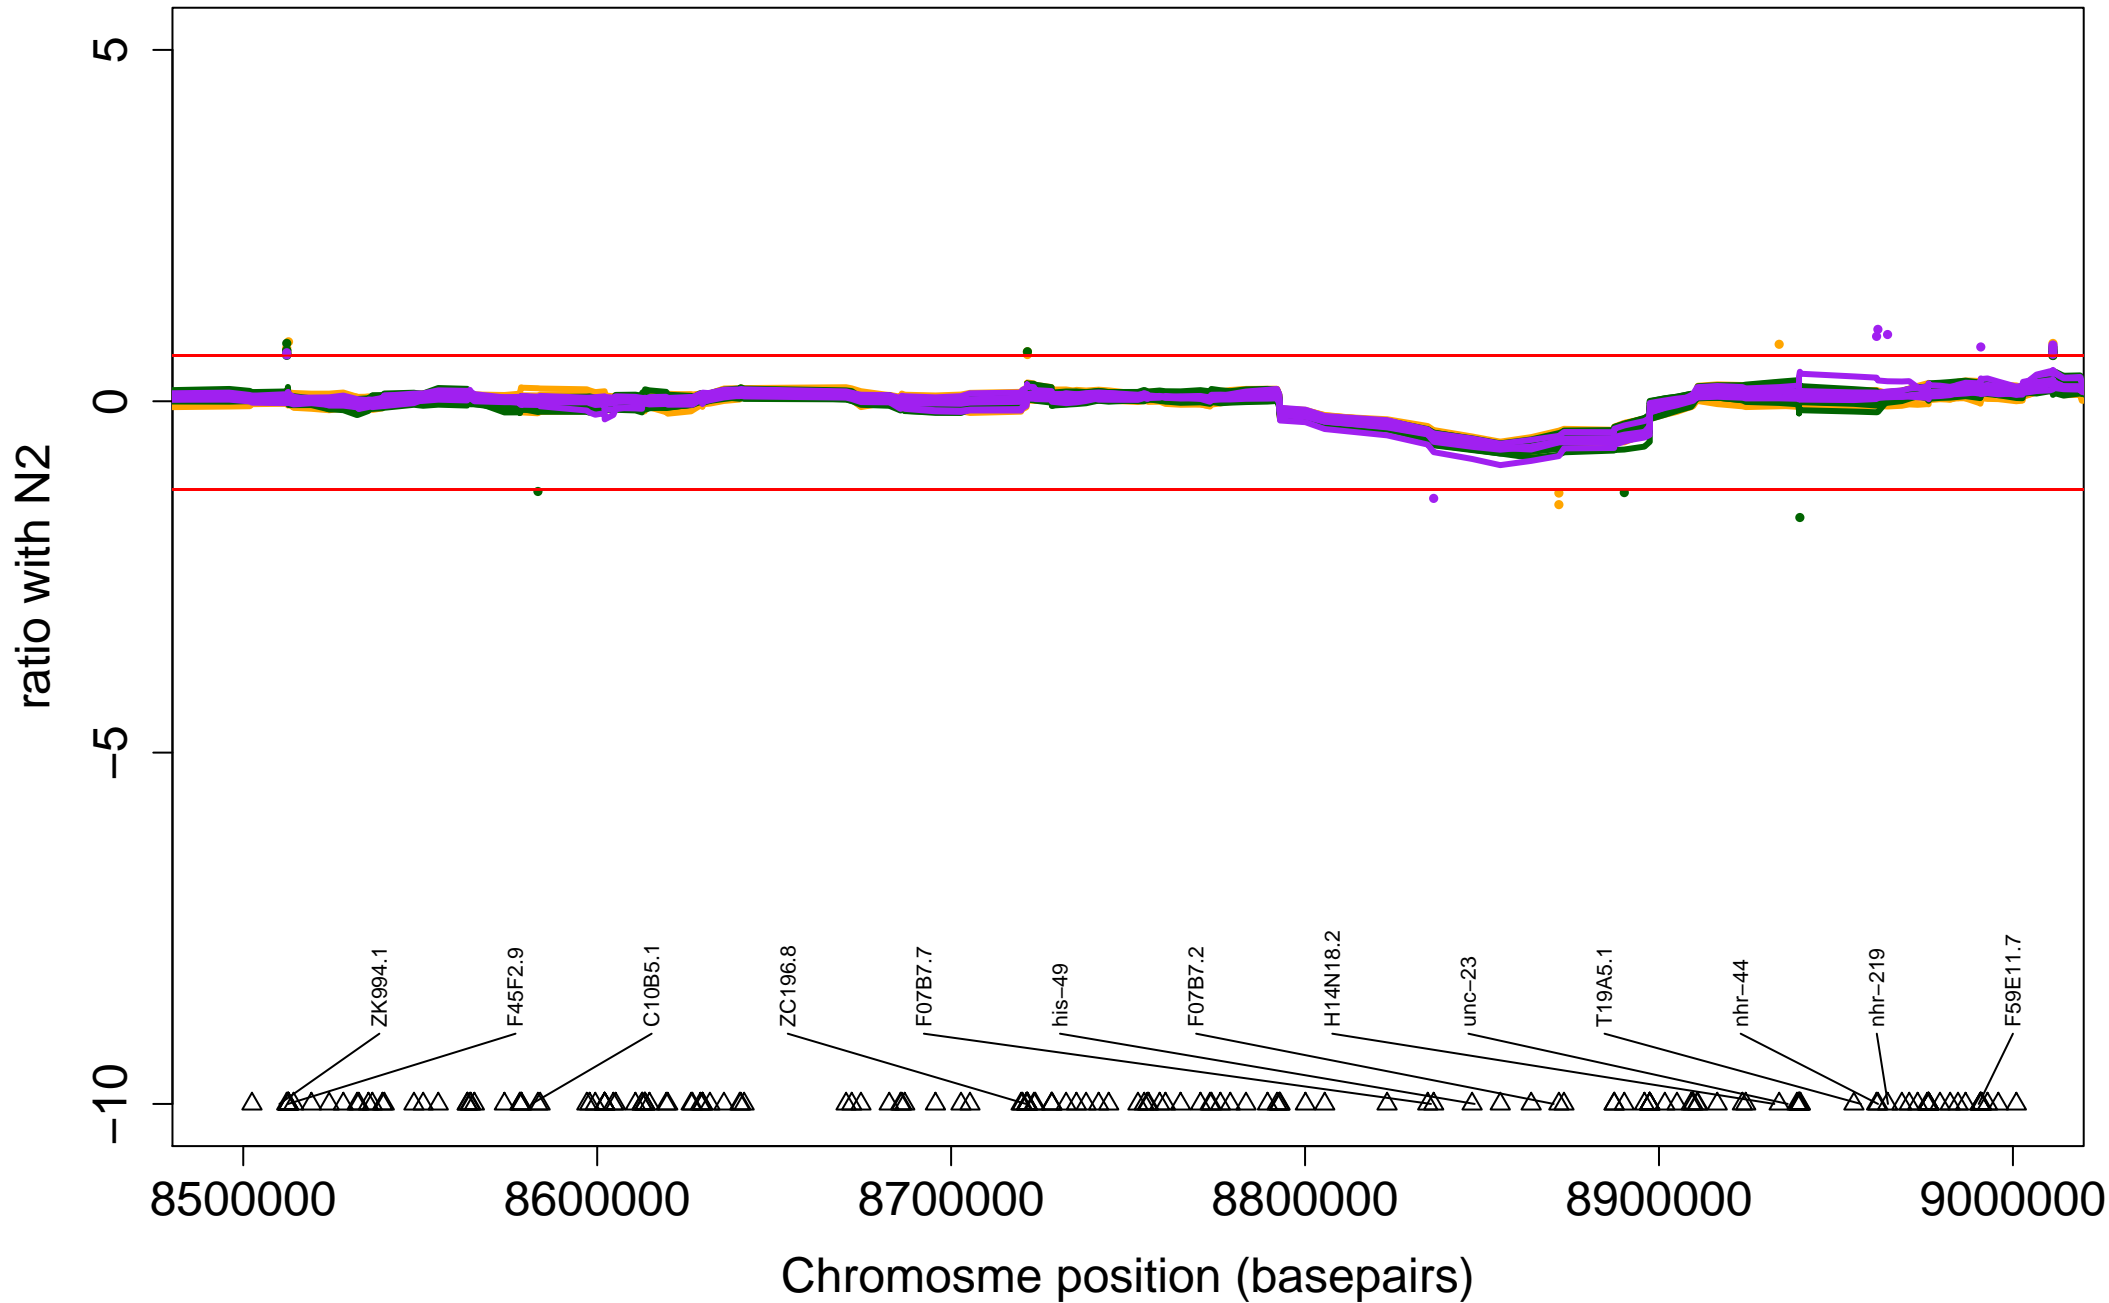

v

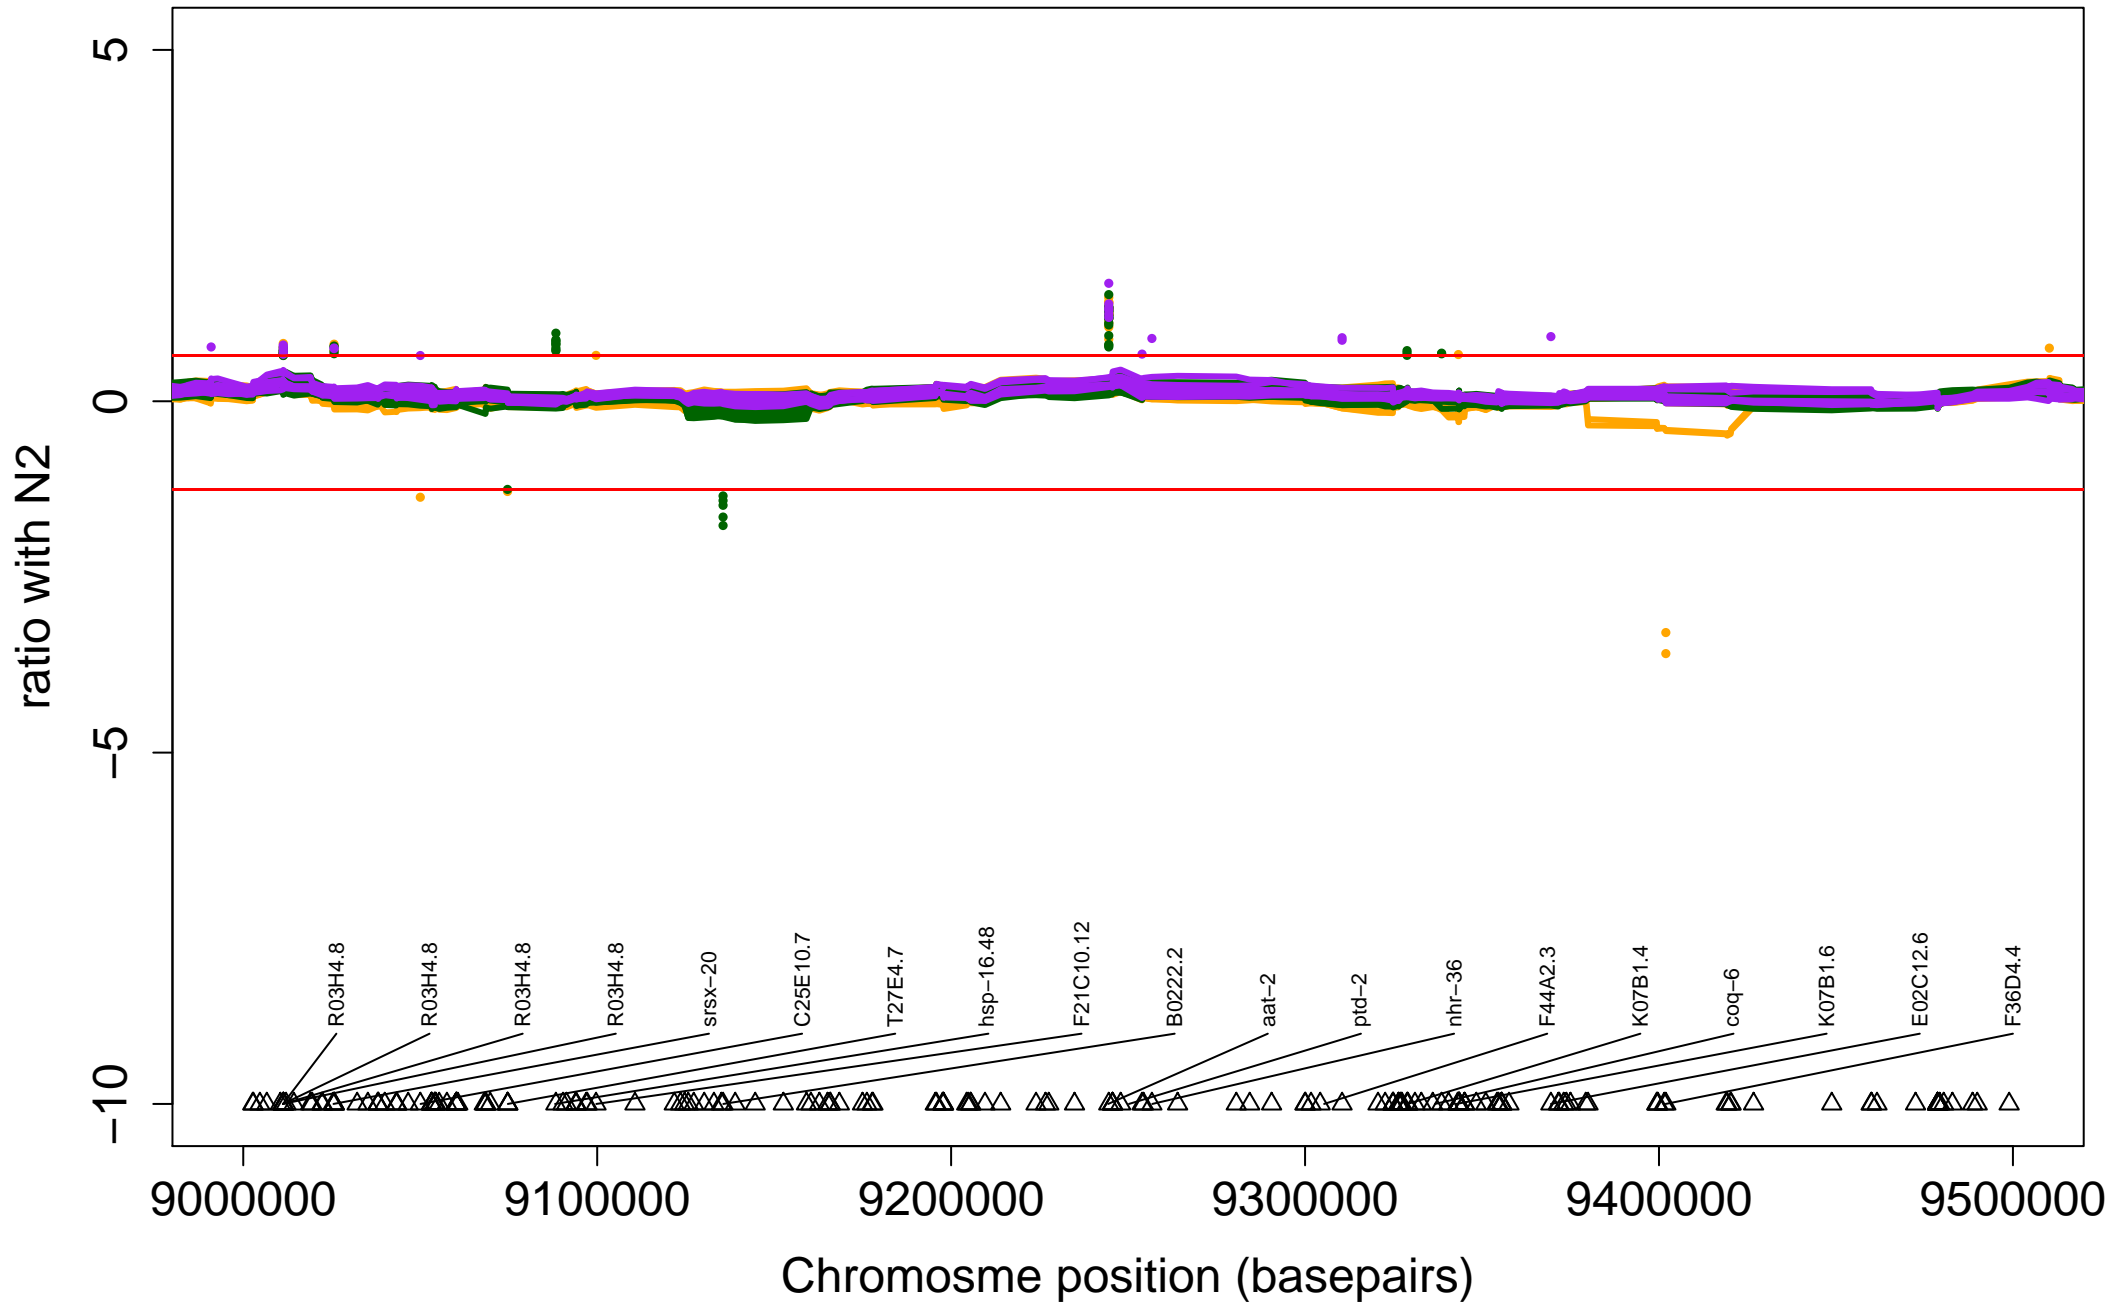

v

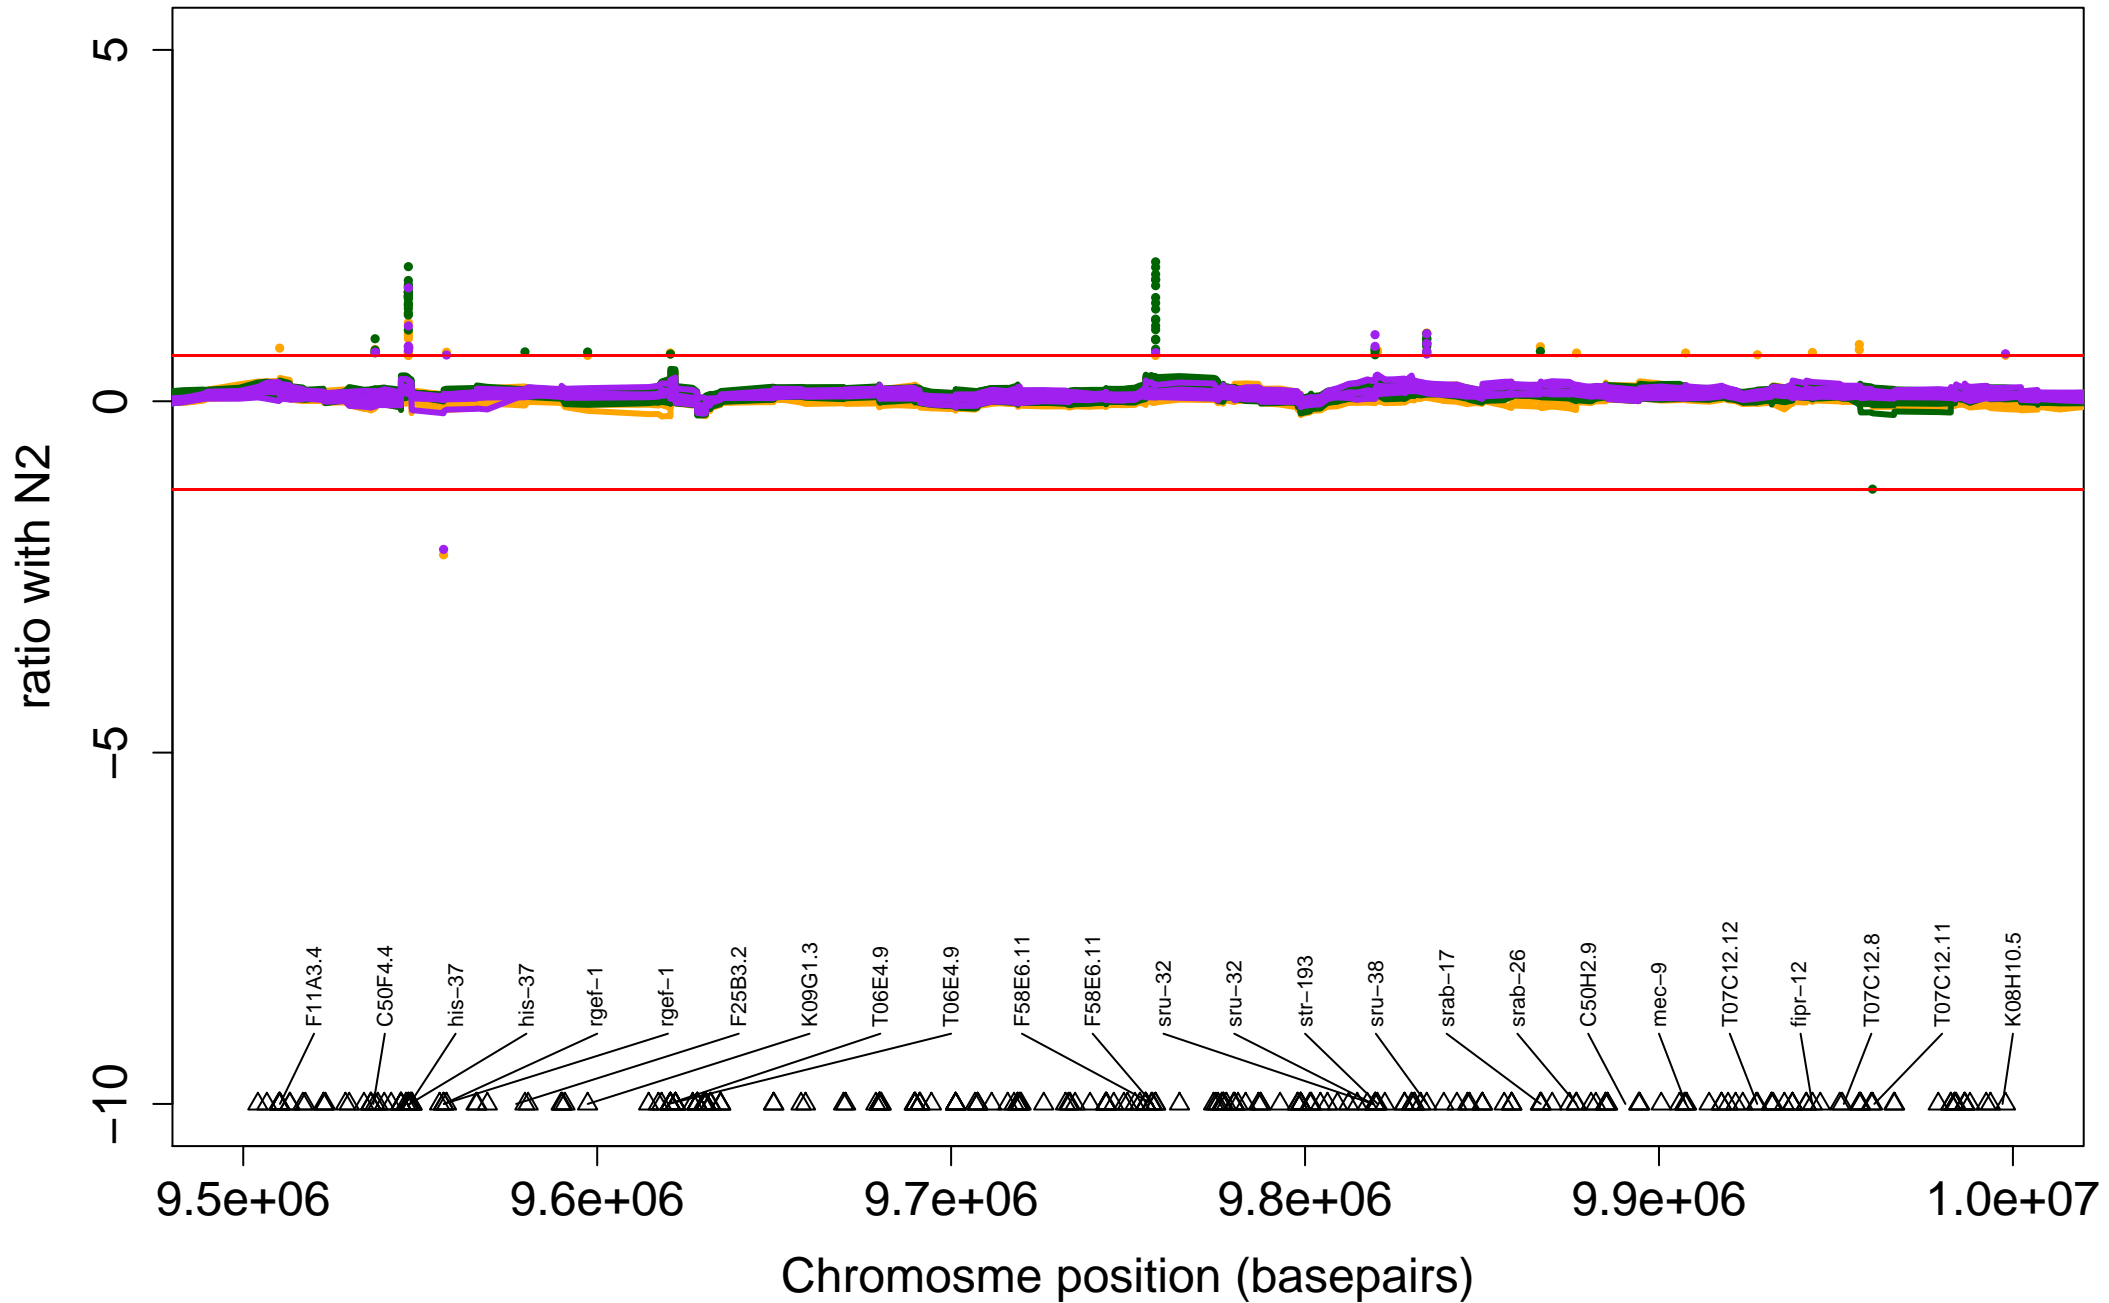

v

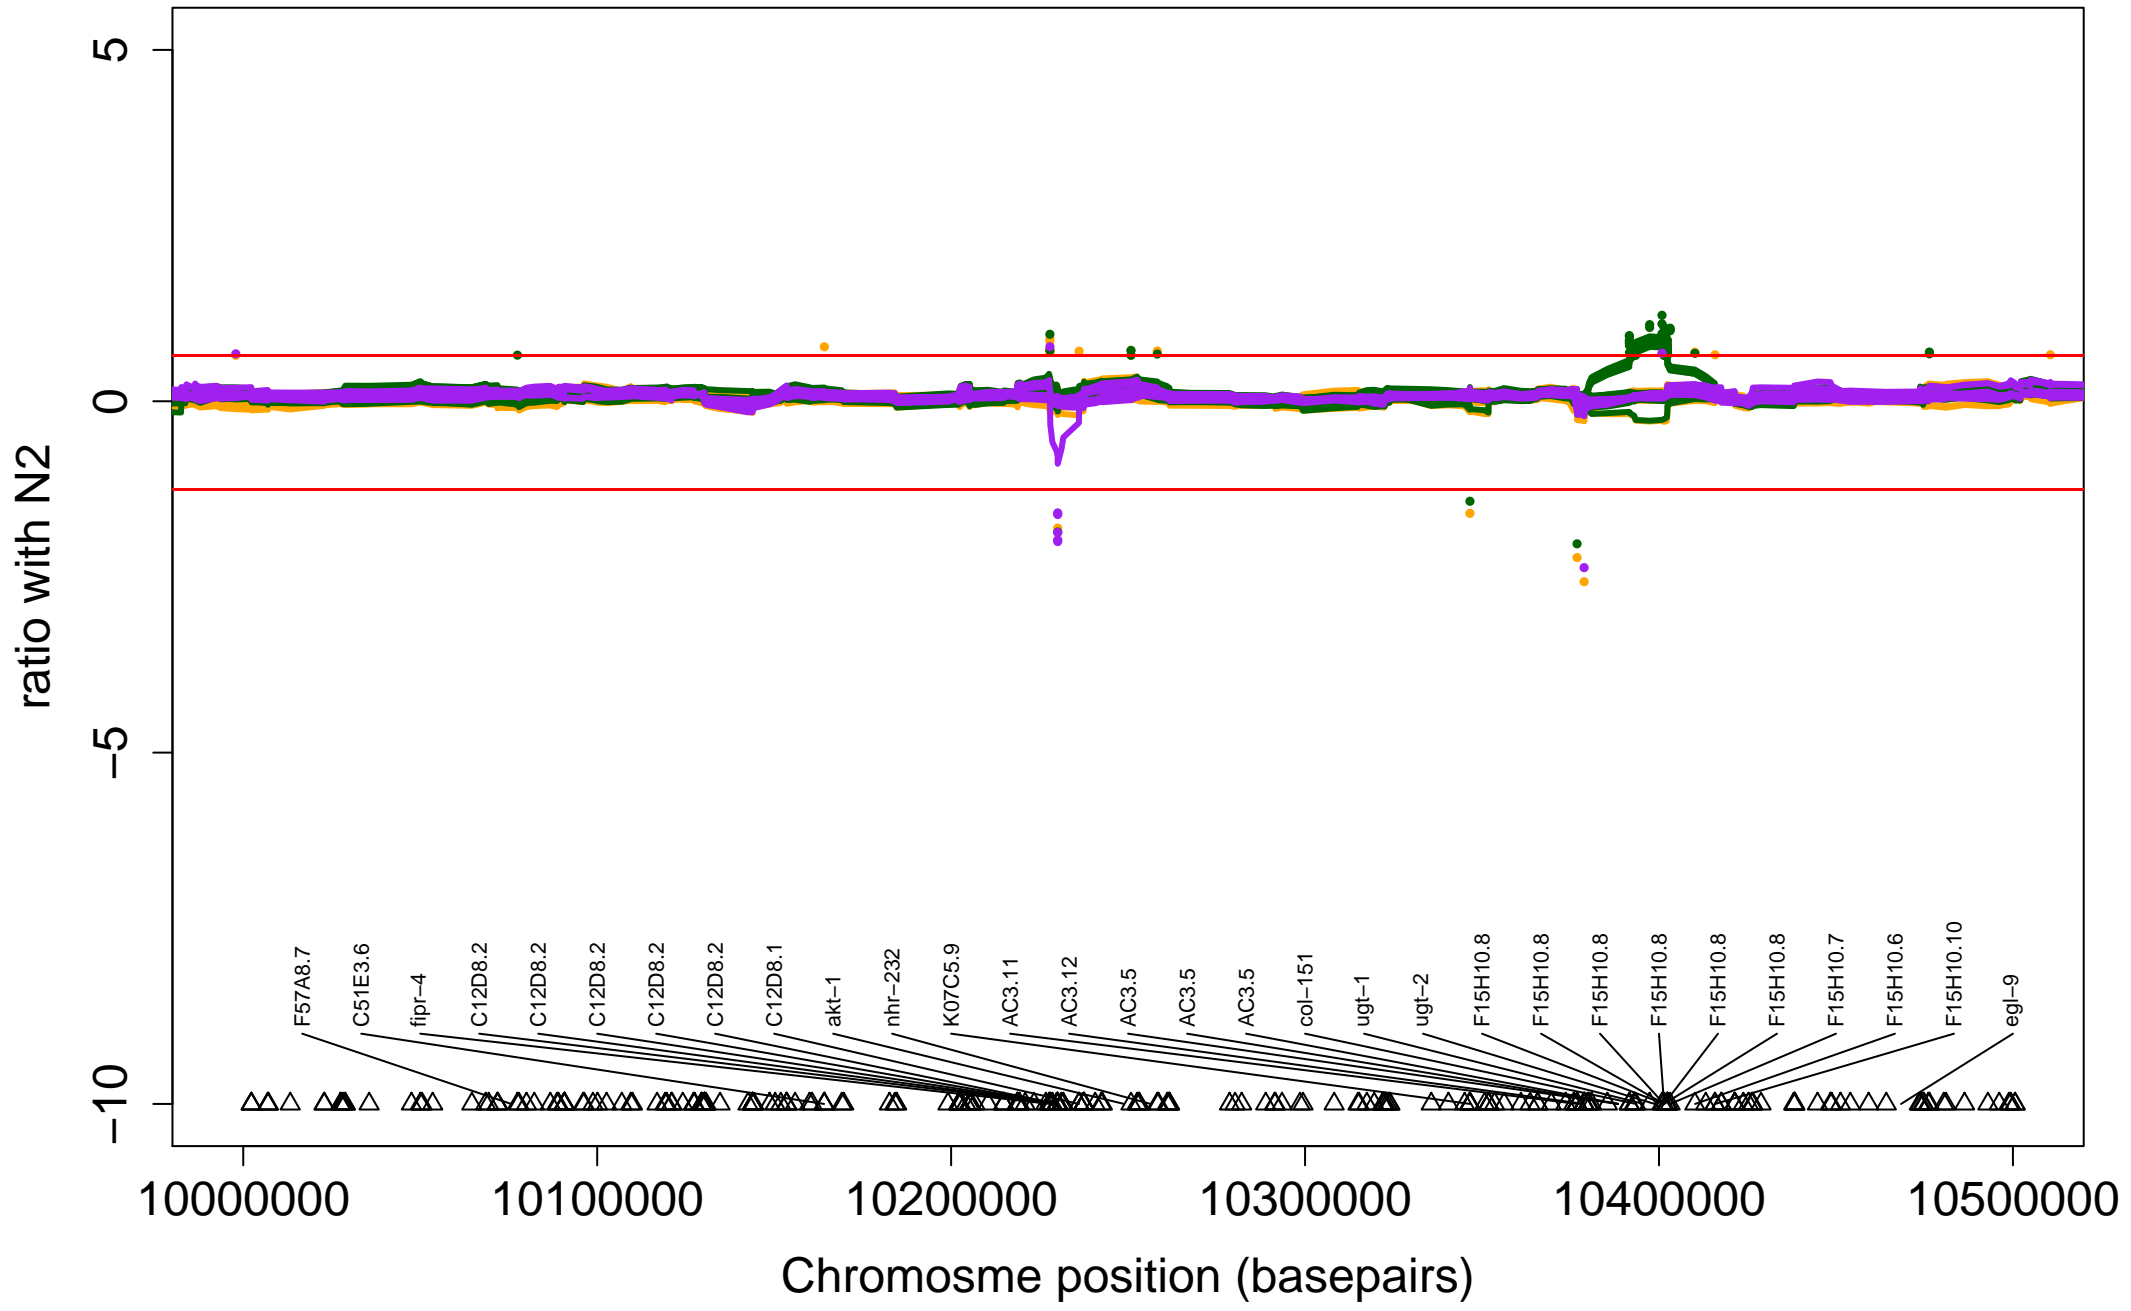

v

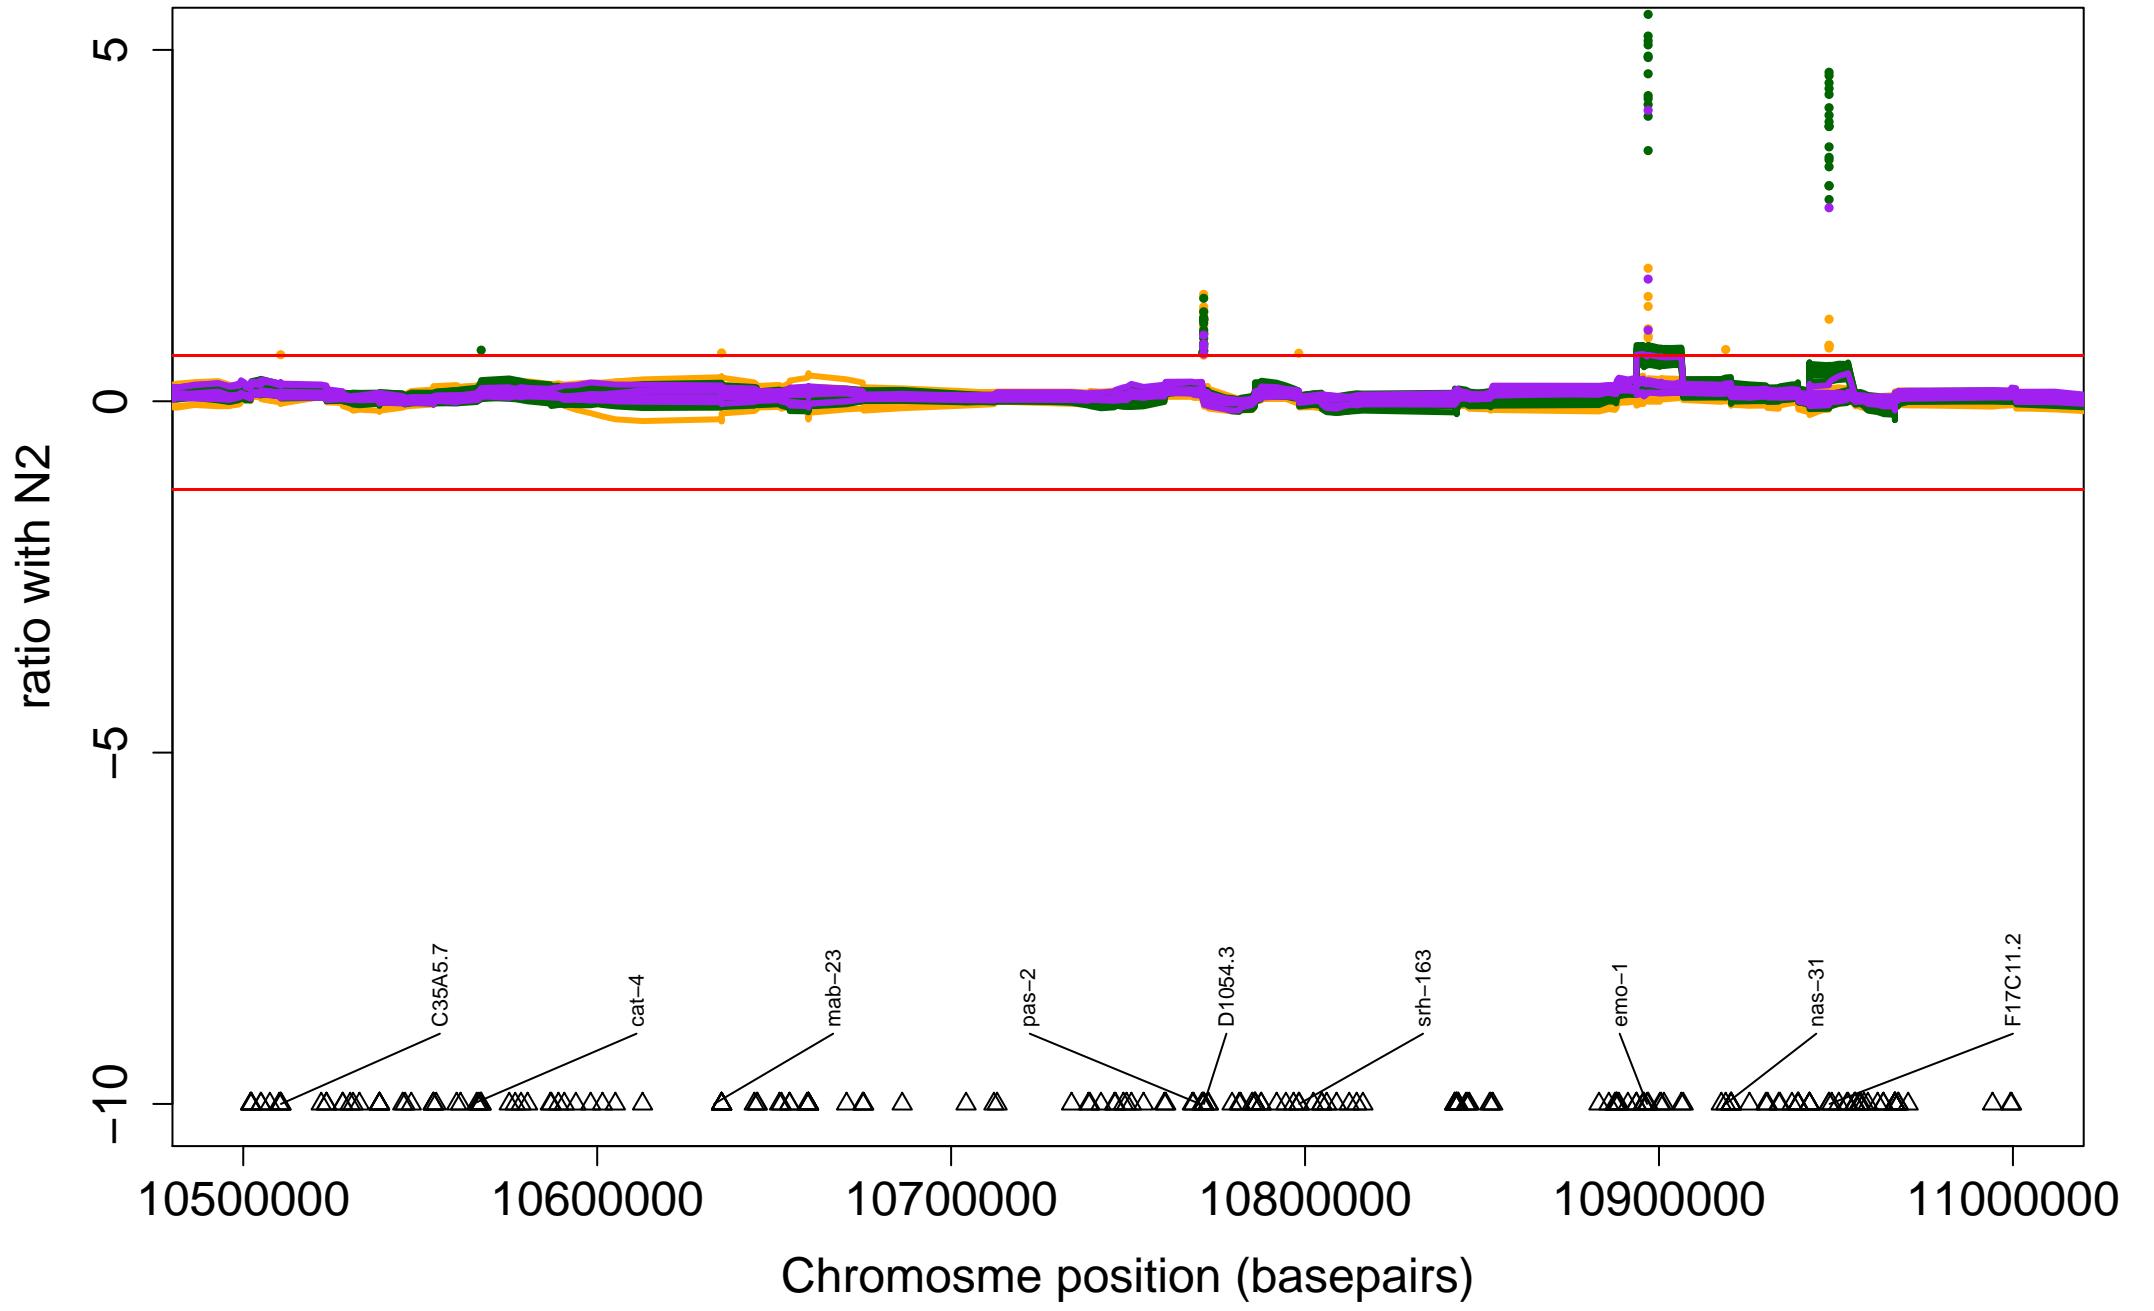

v

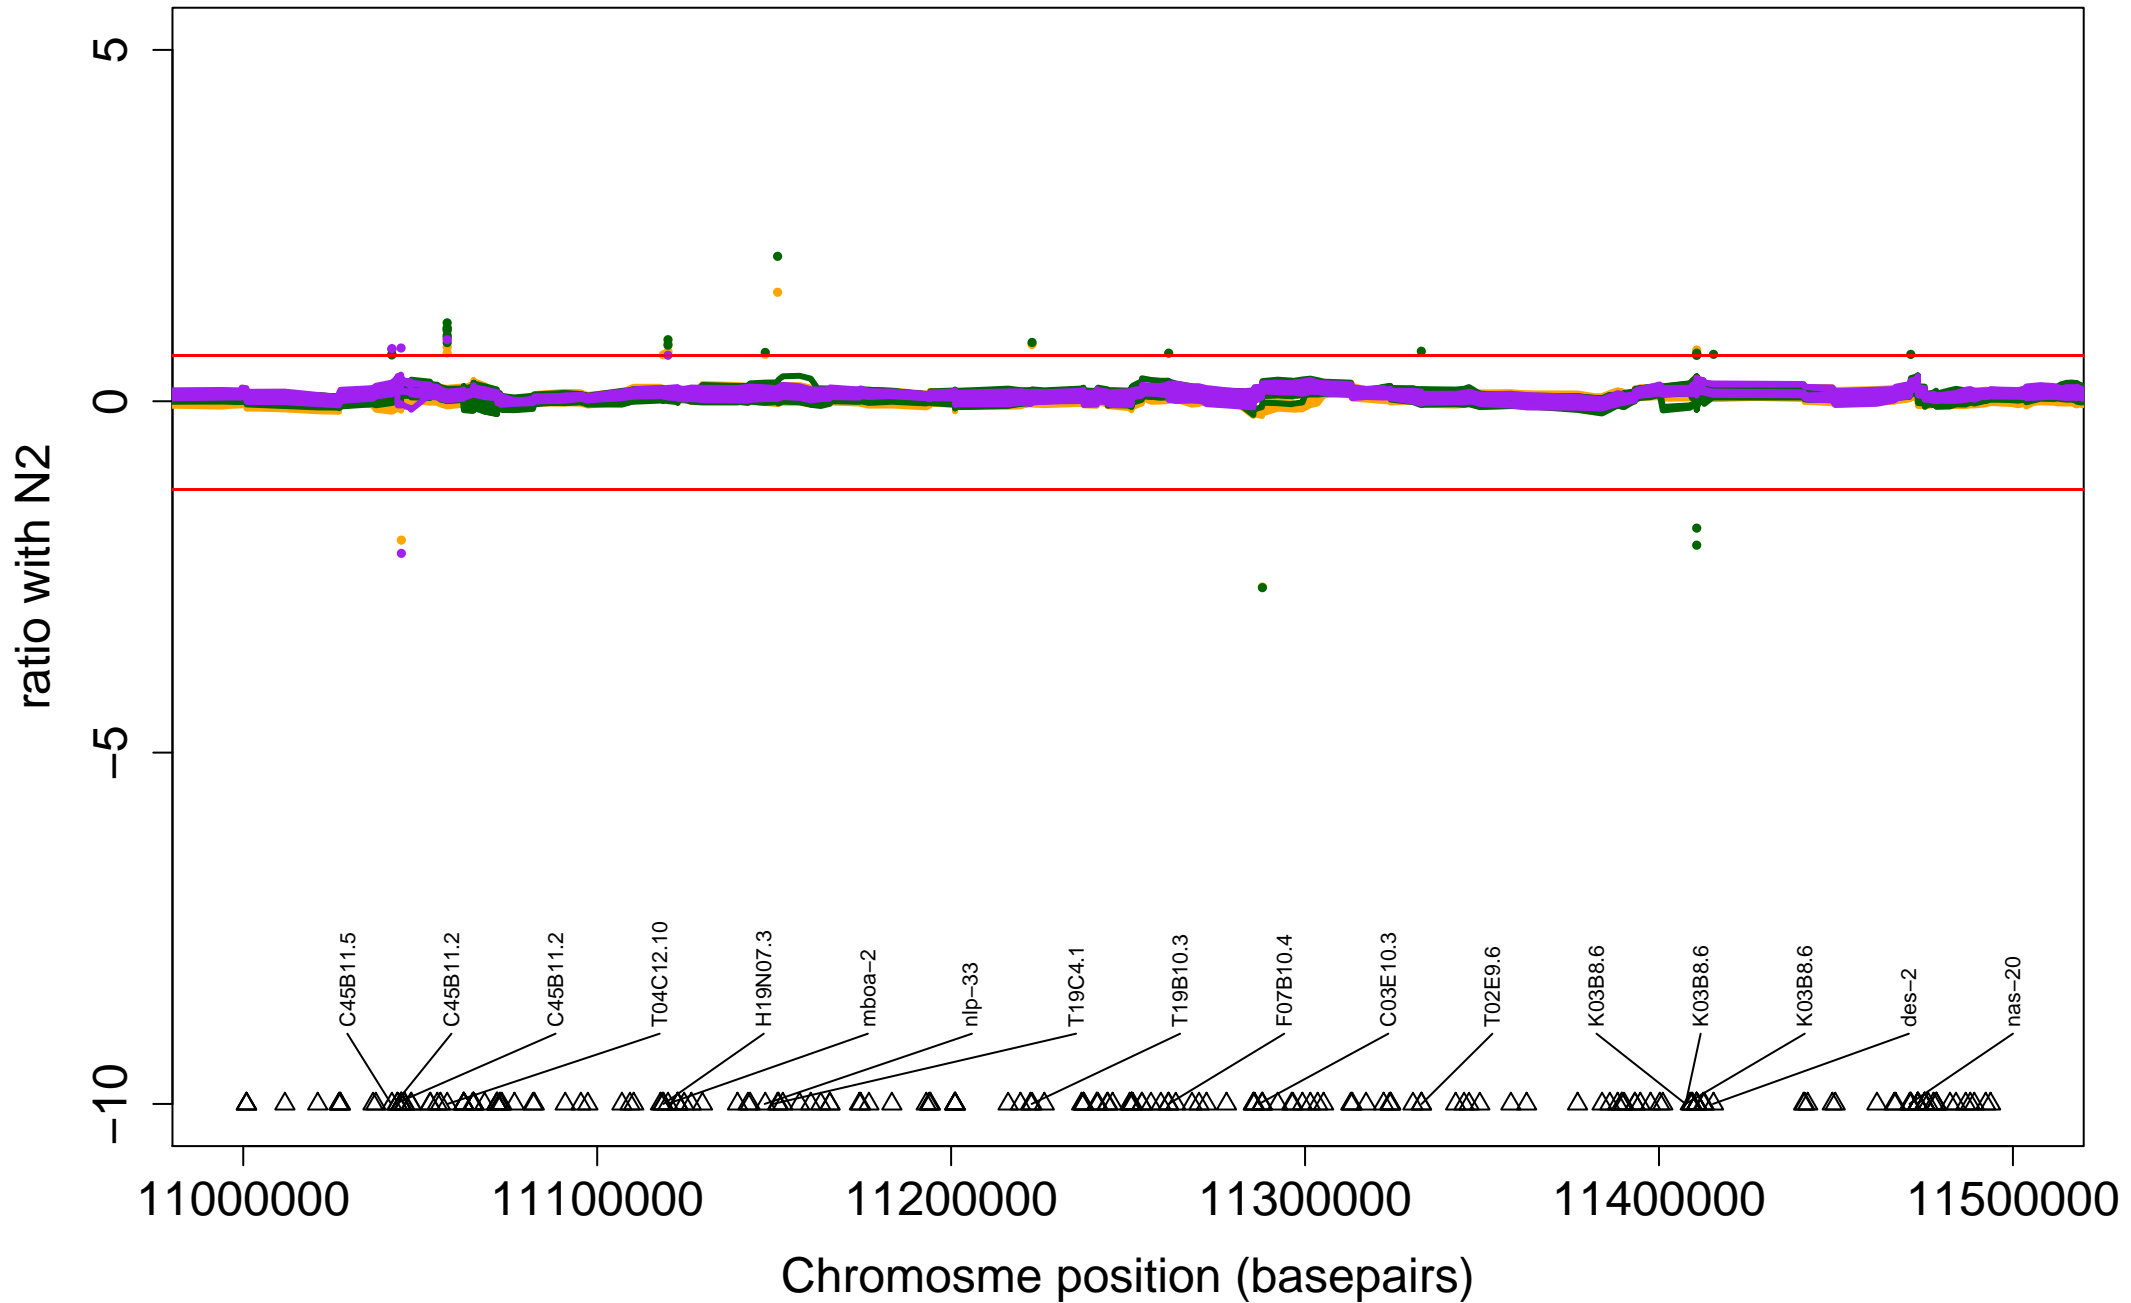

v

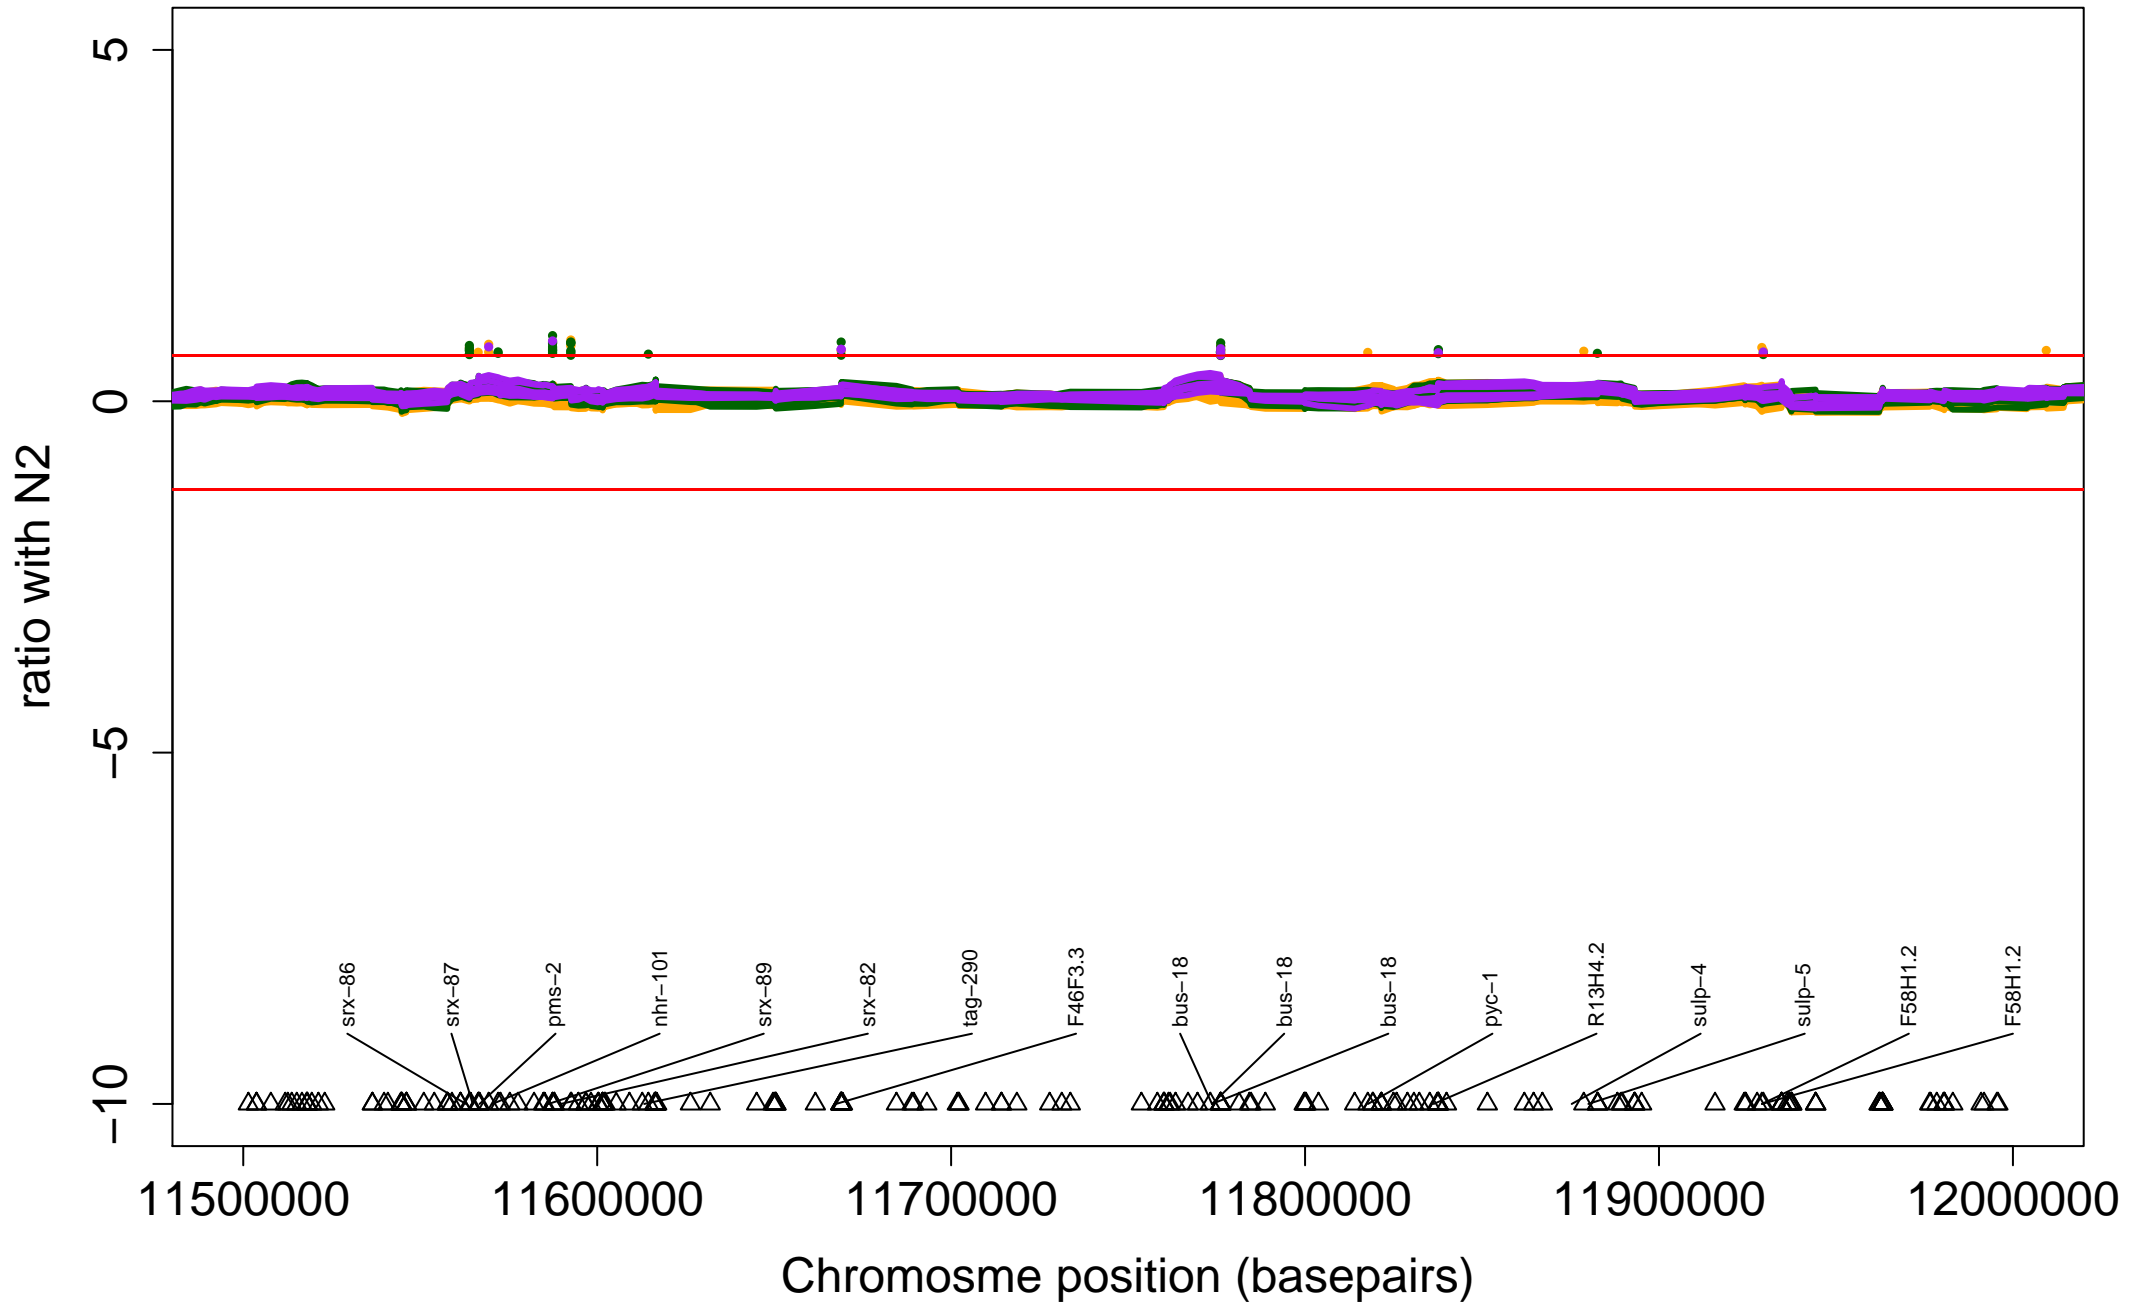



V

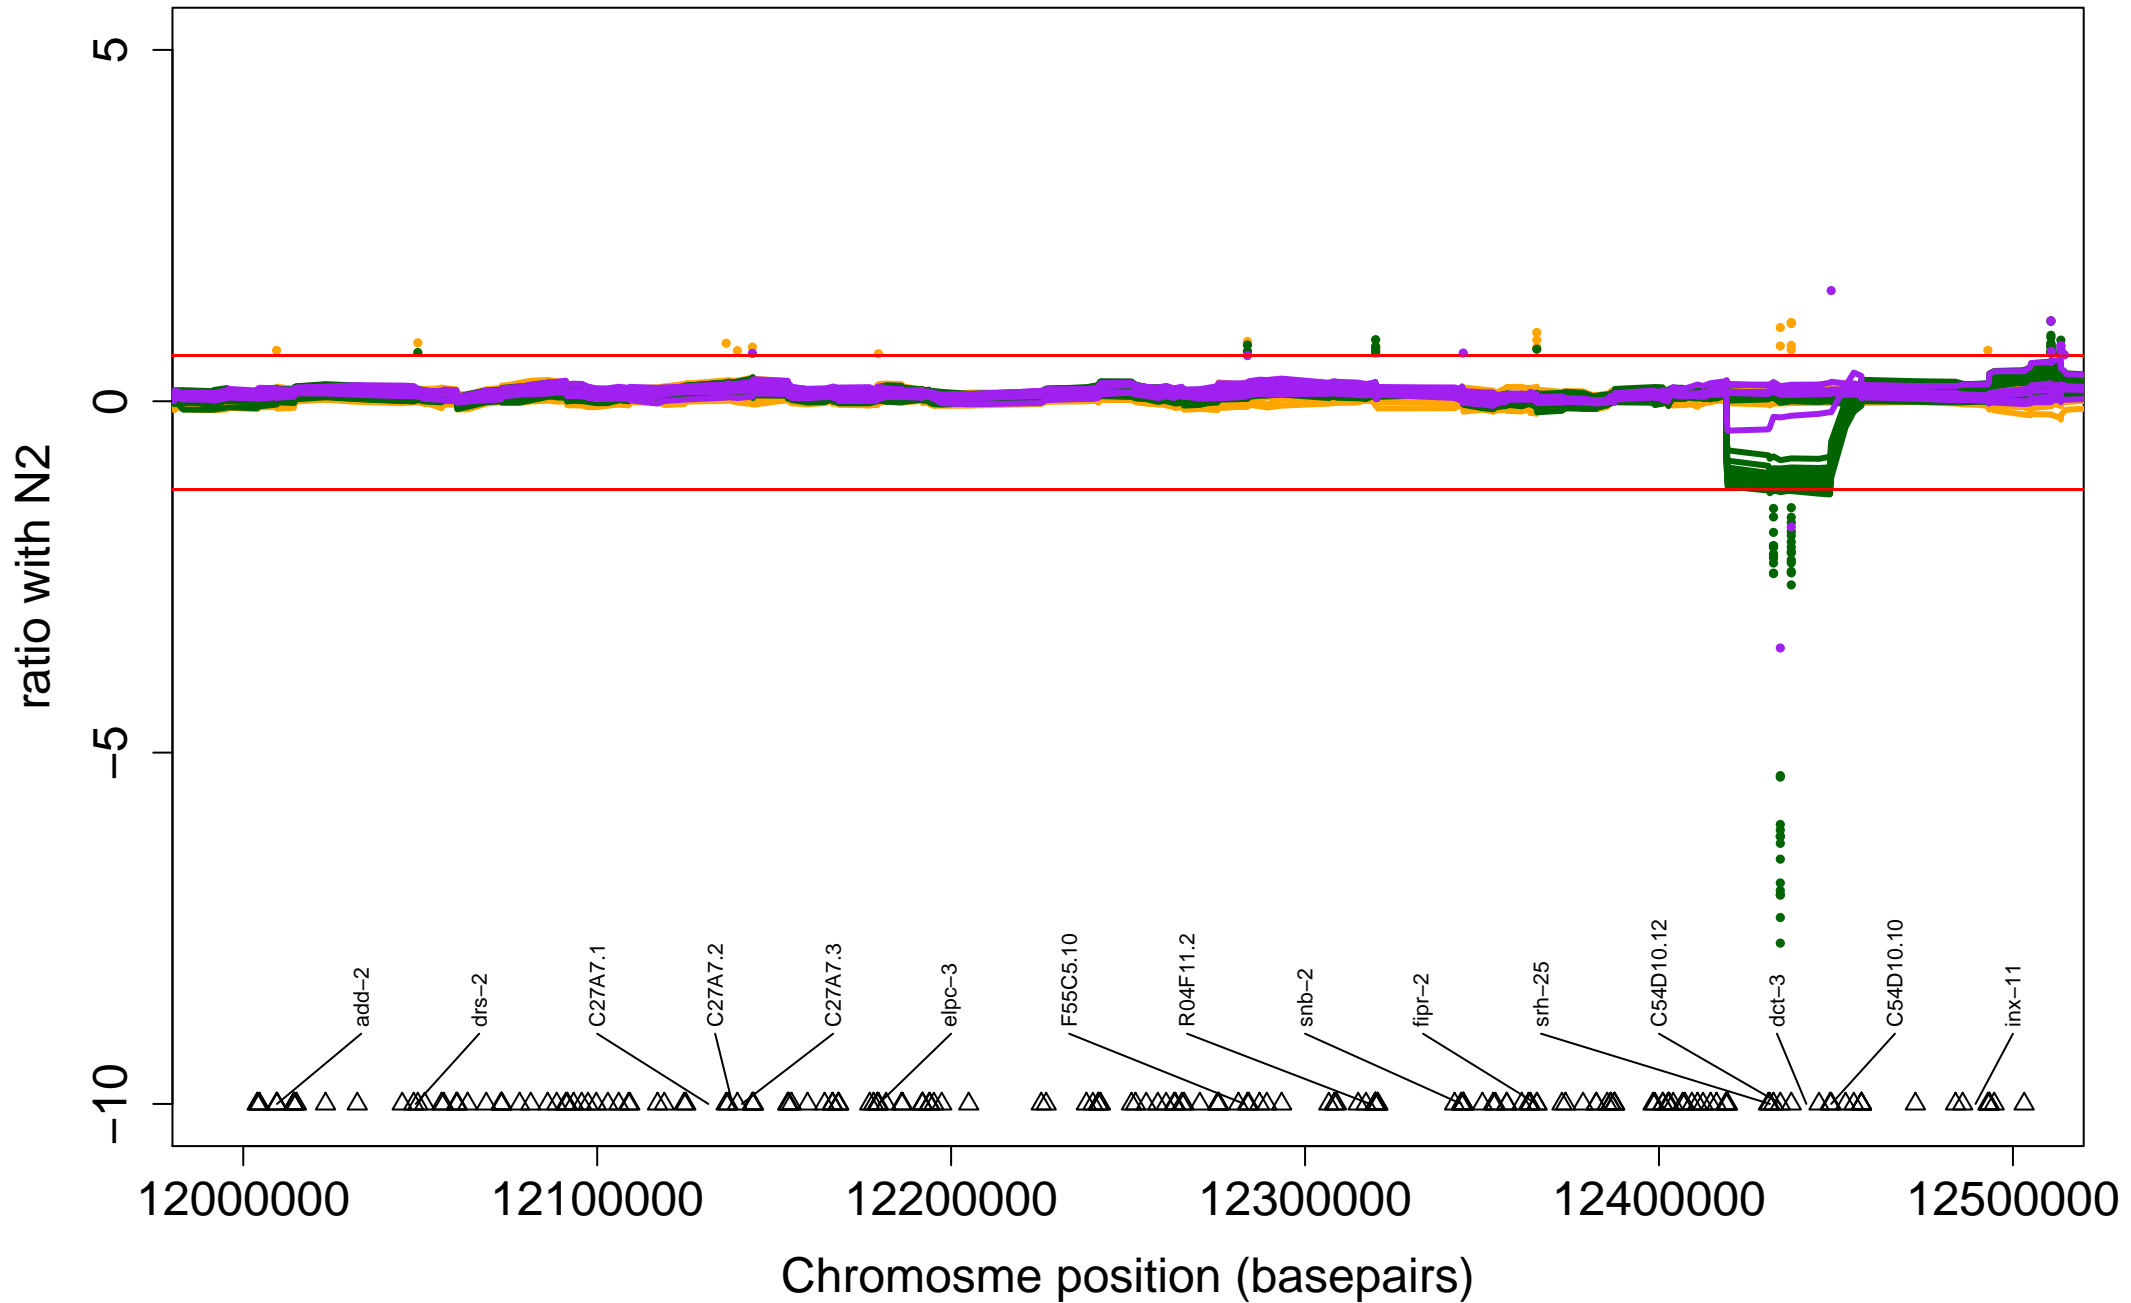

V

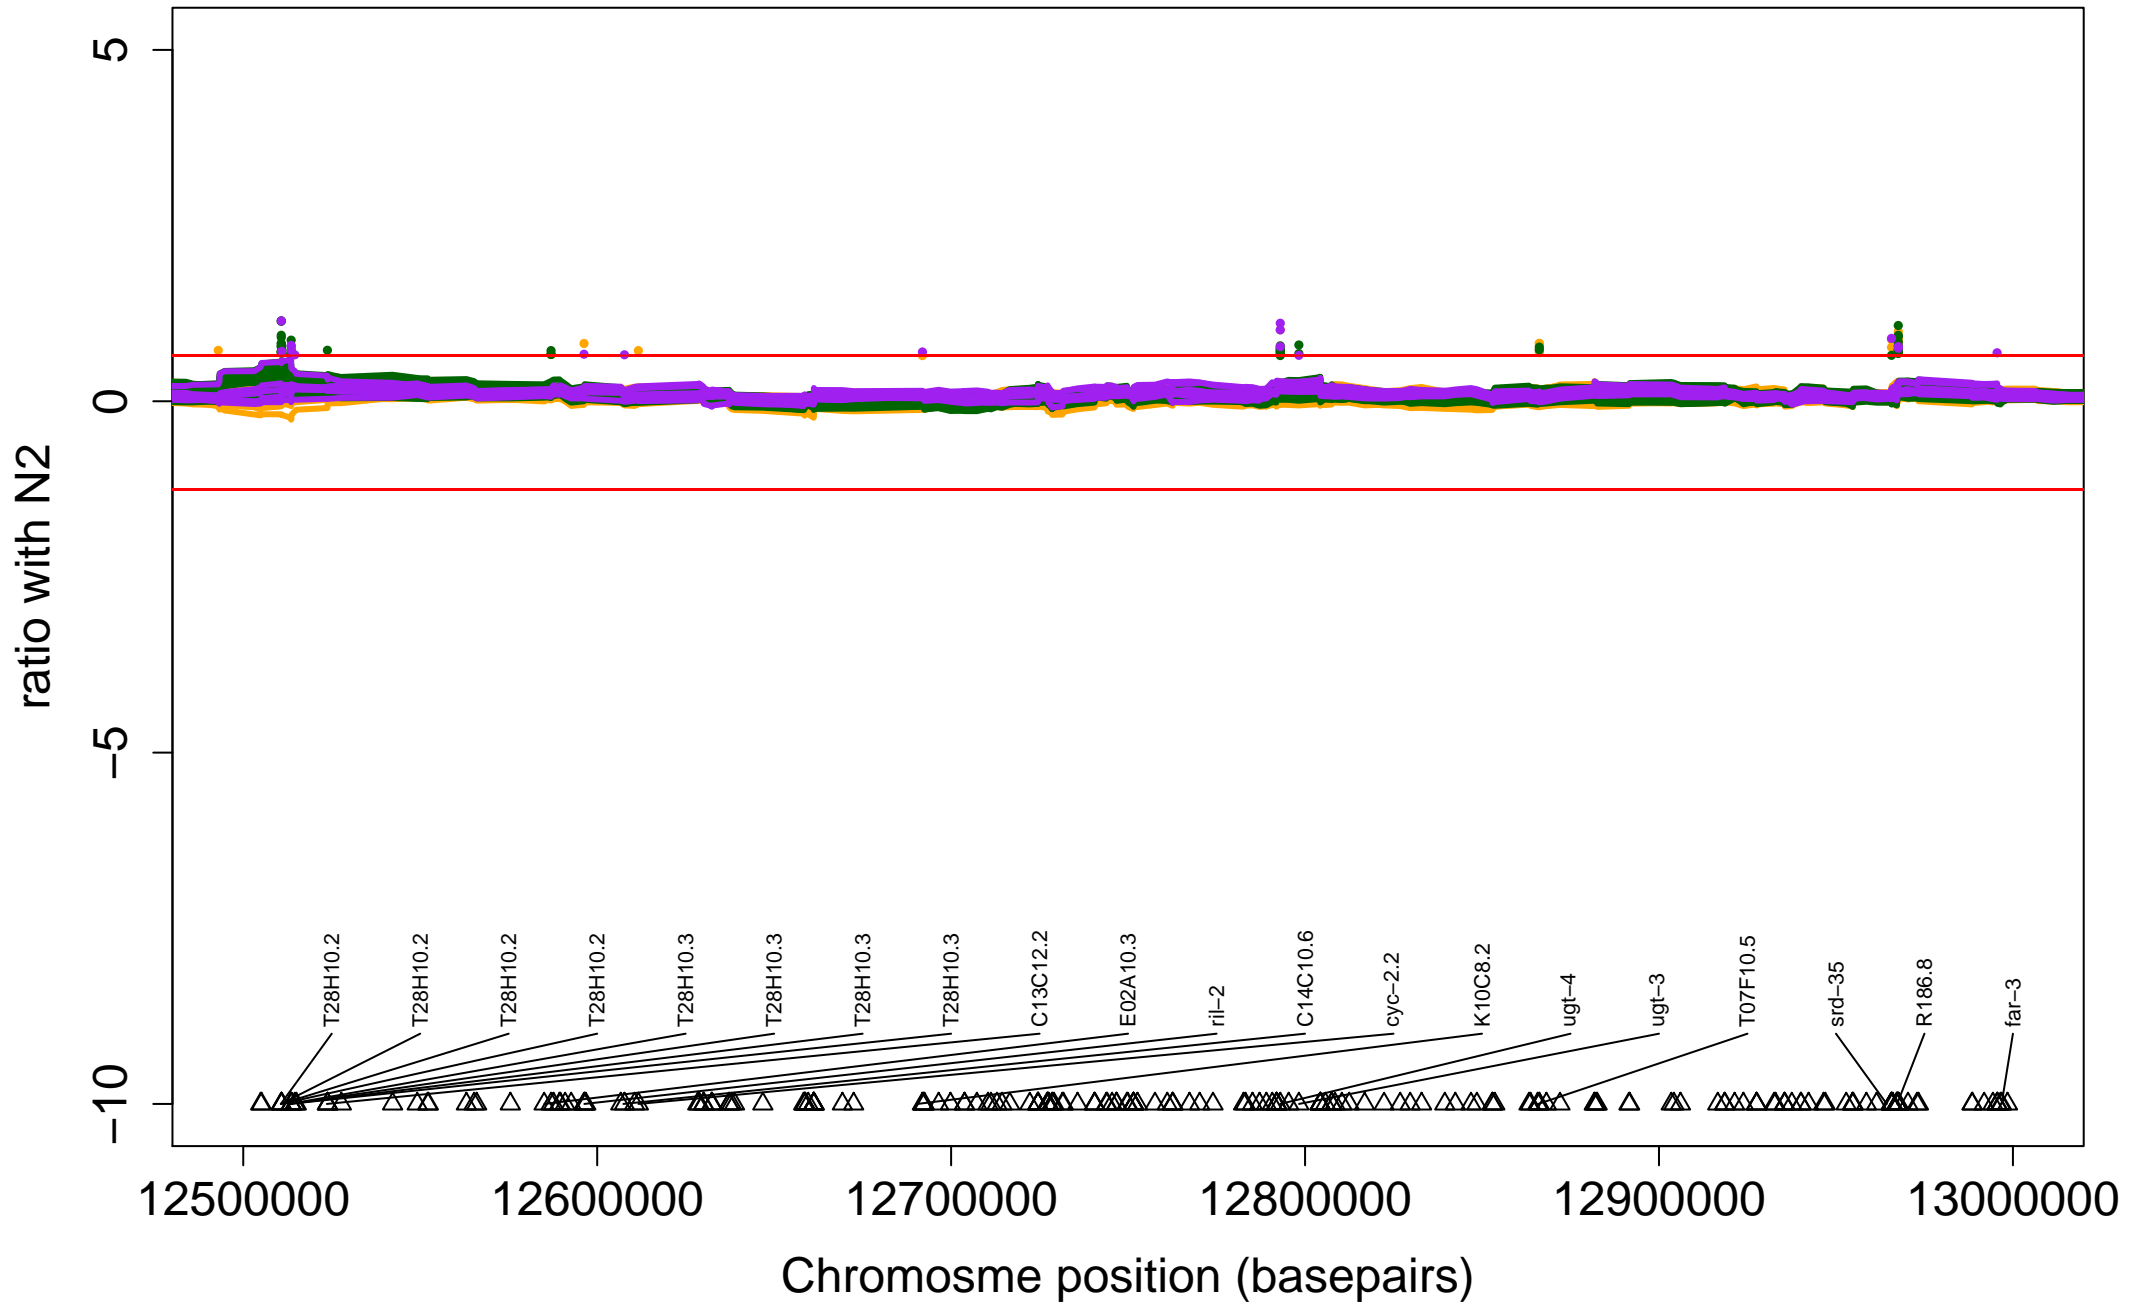

v

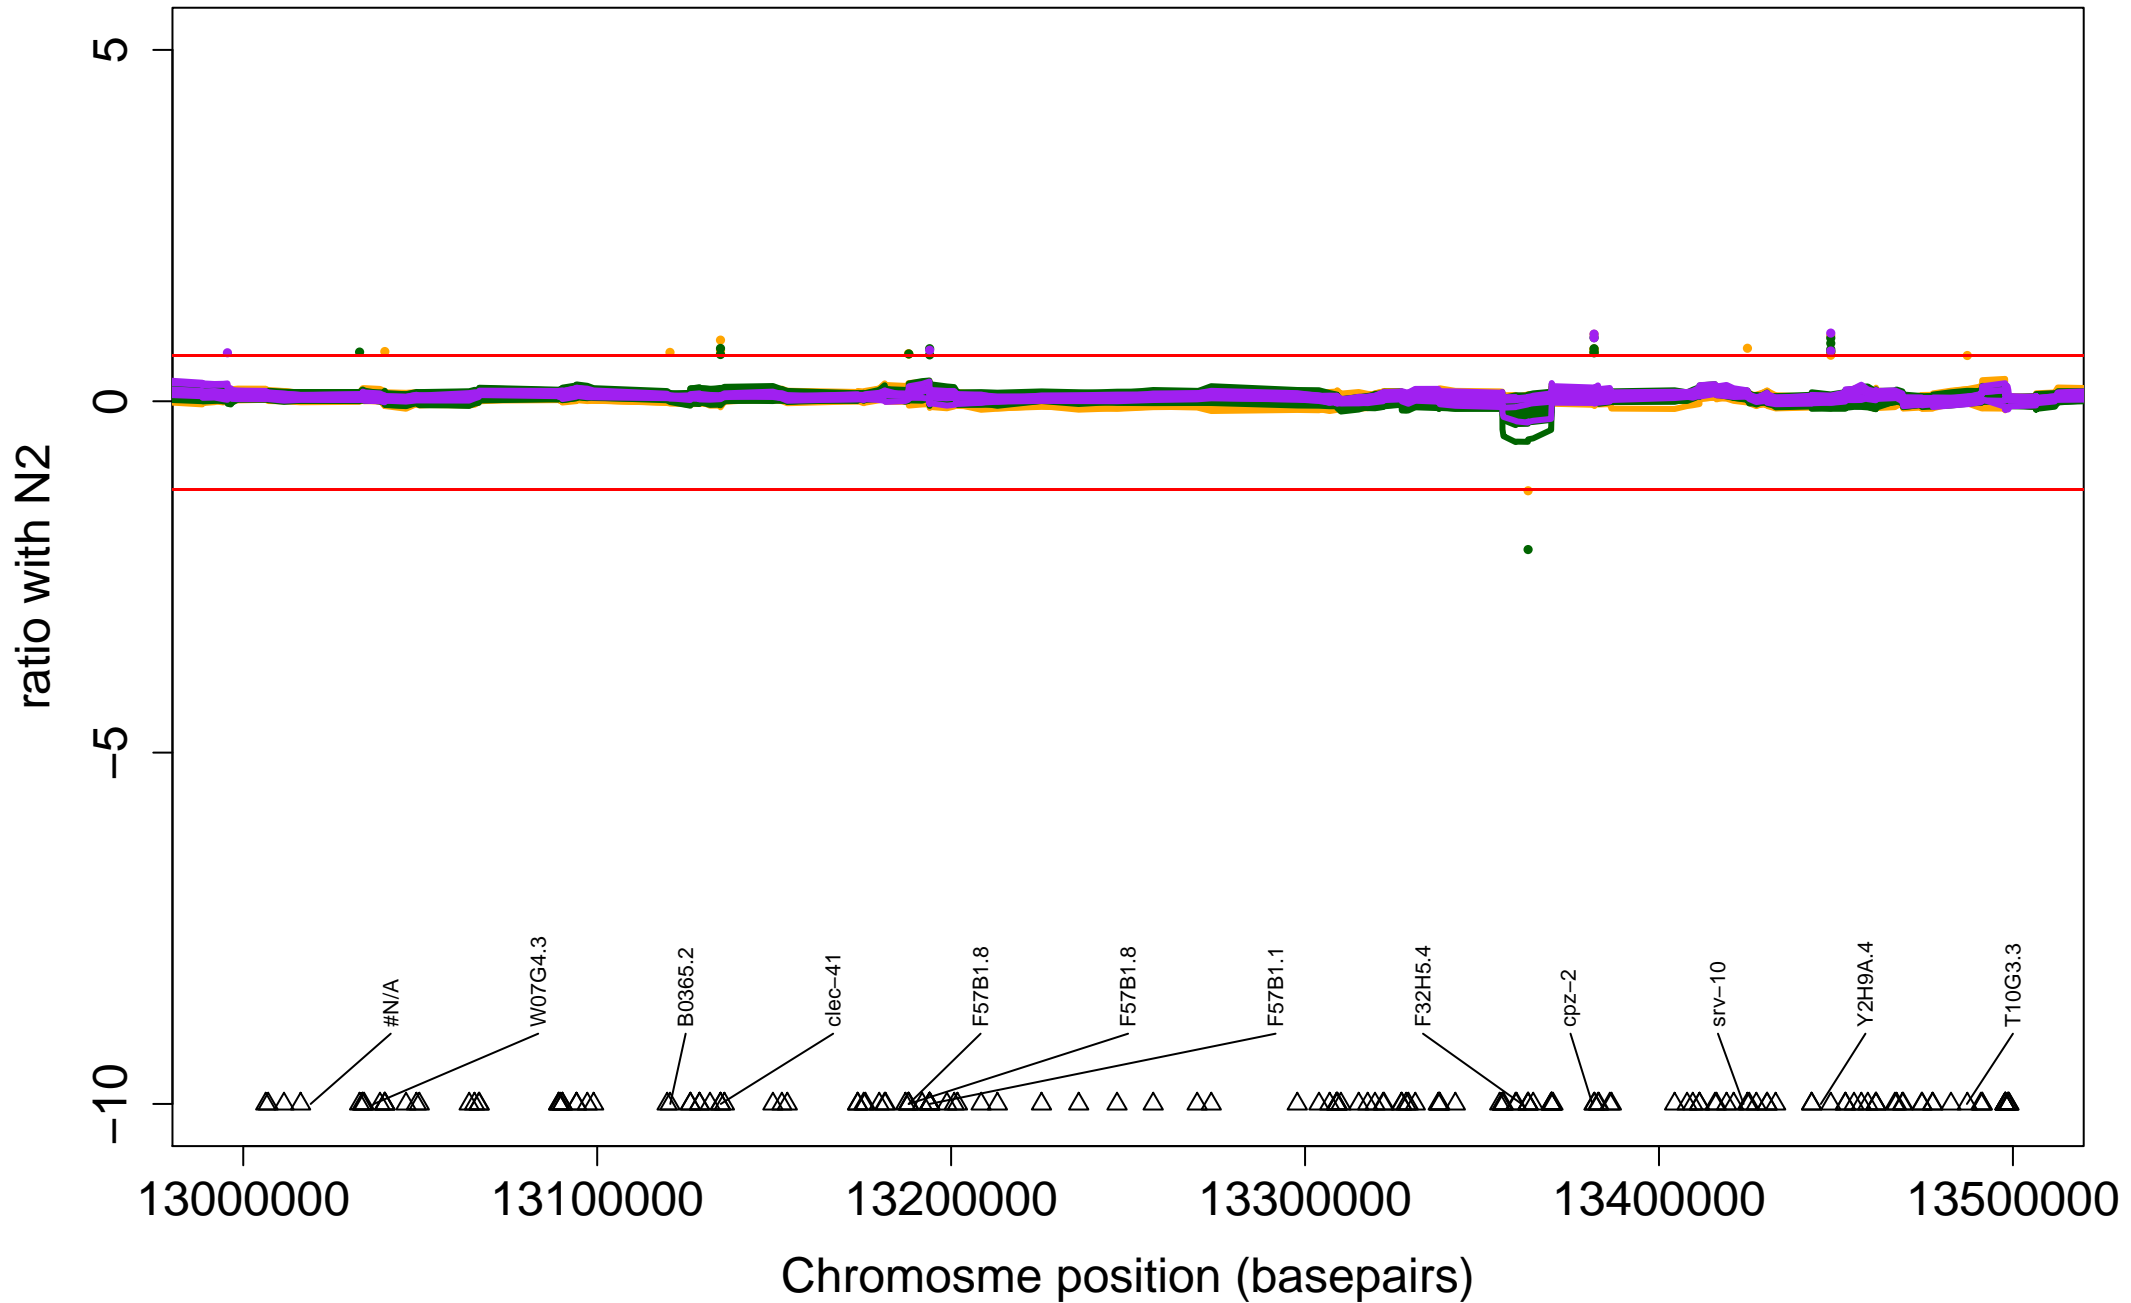

v

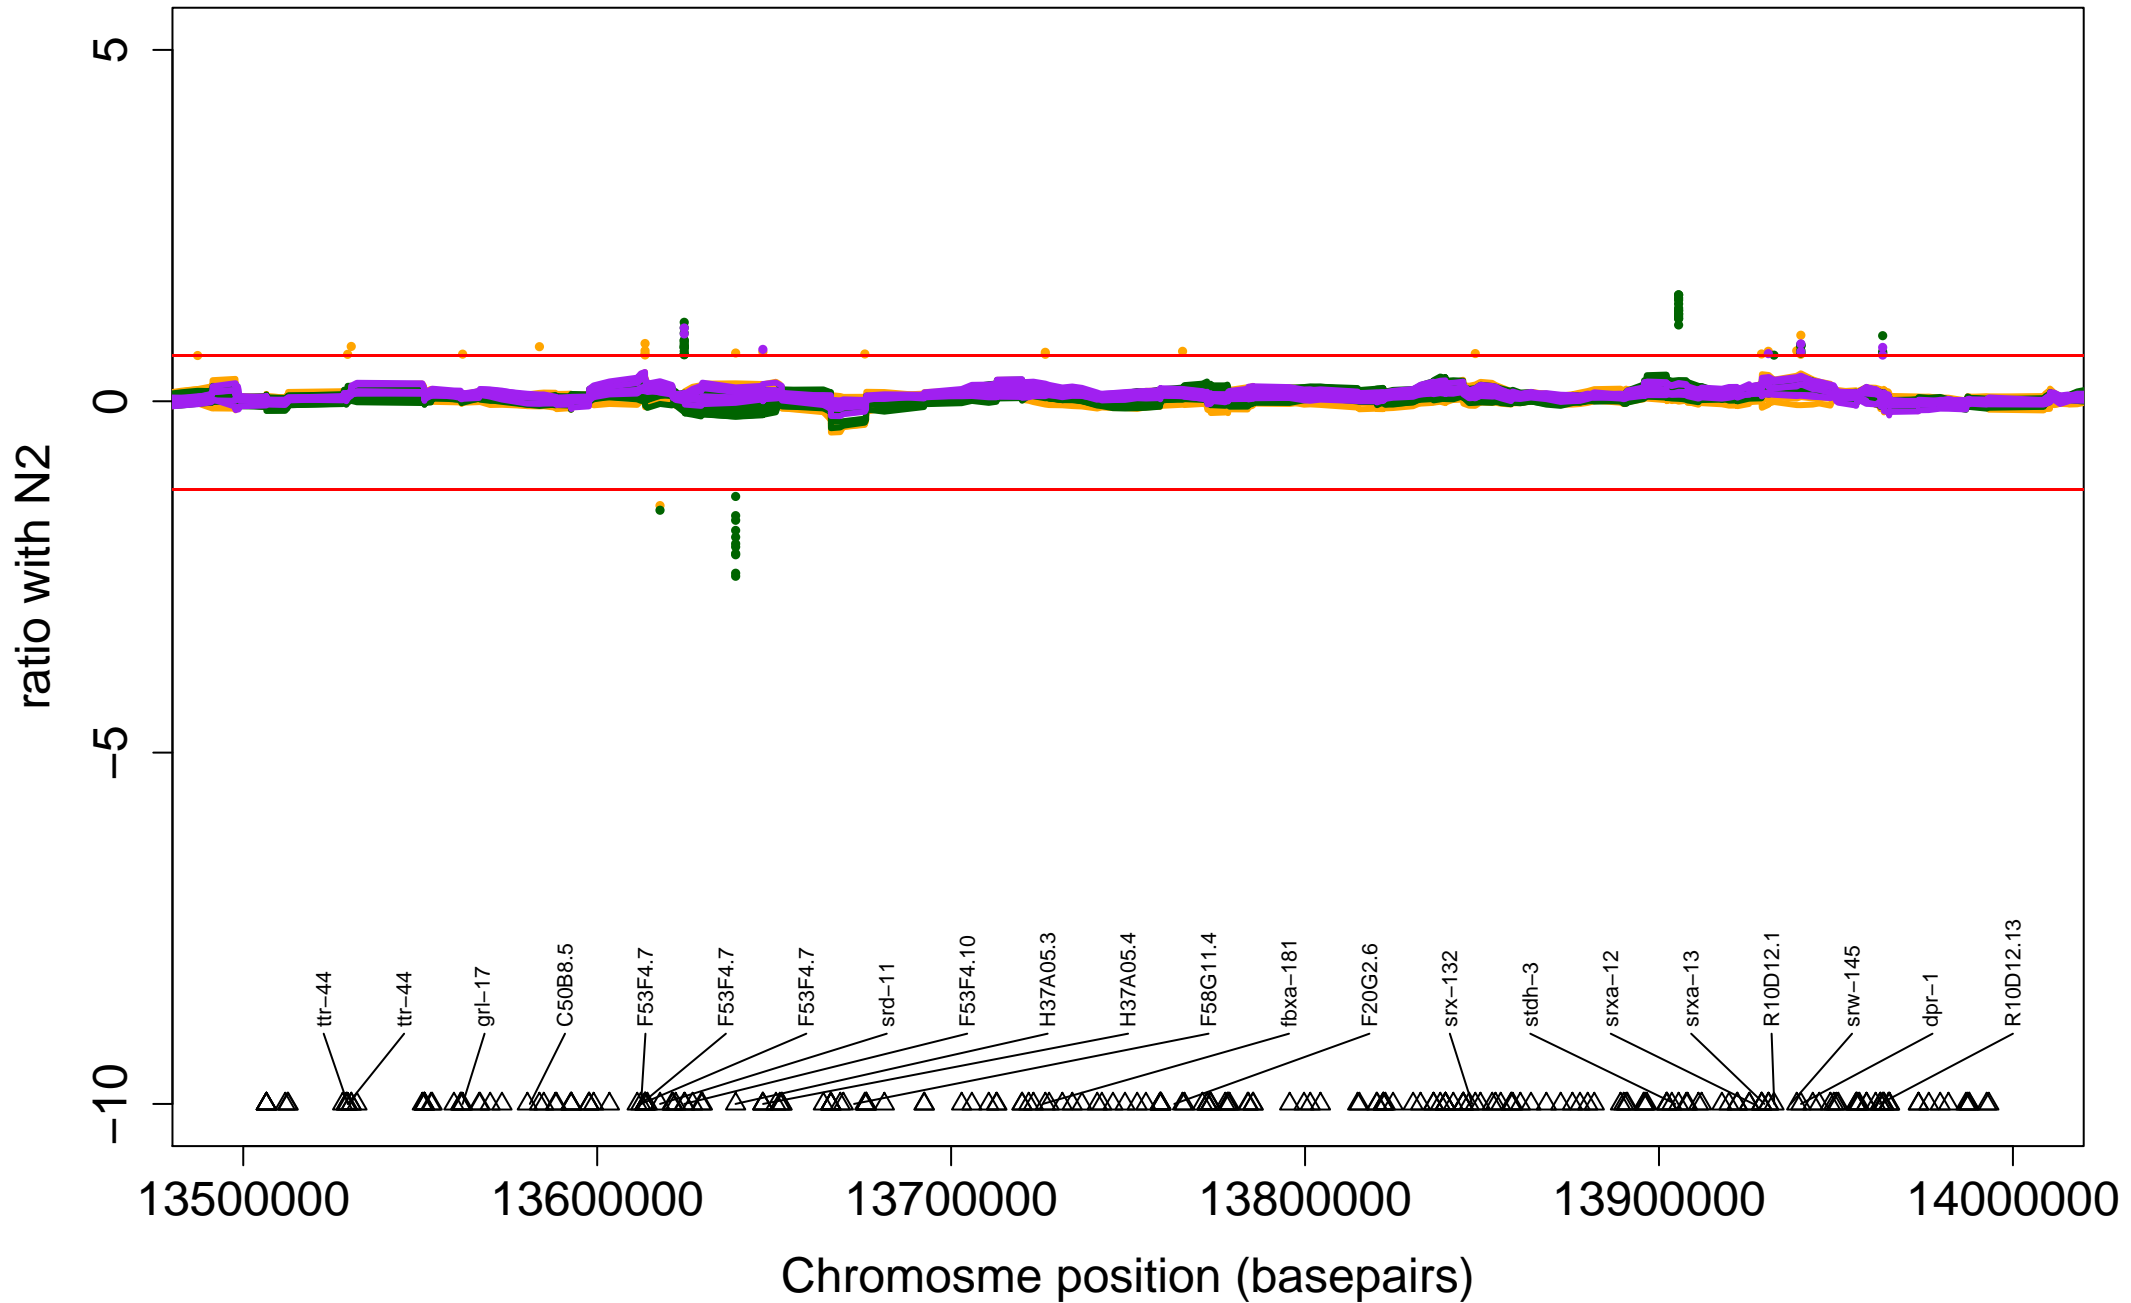

v

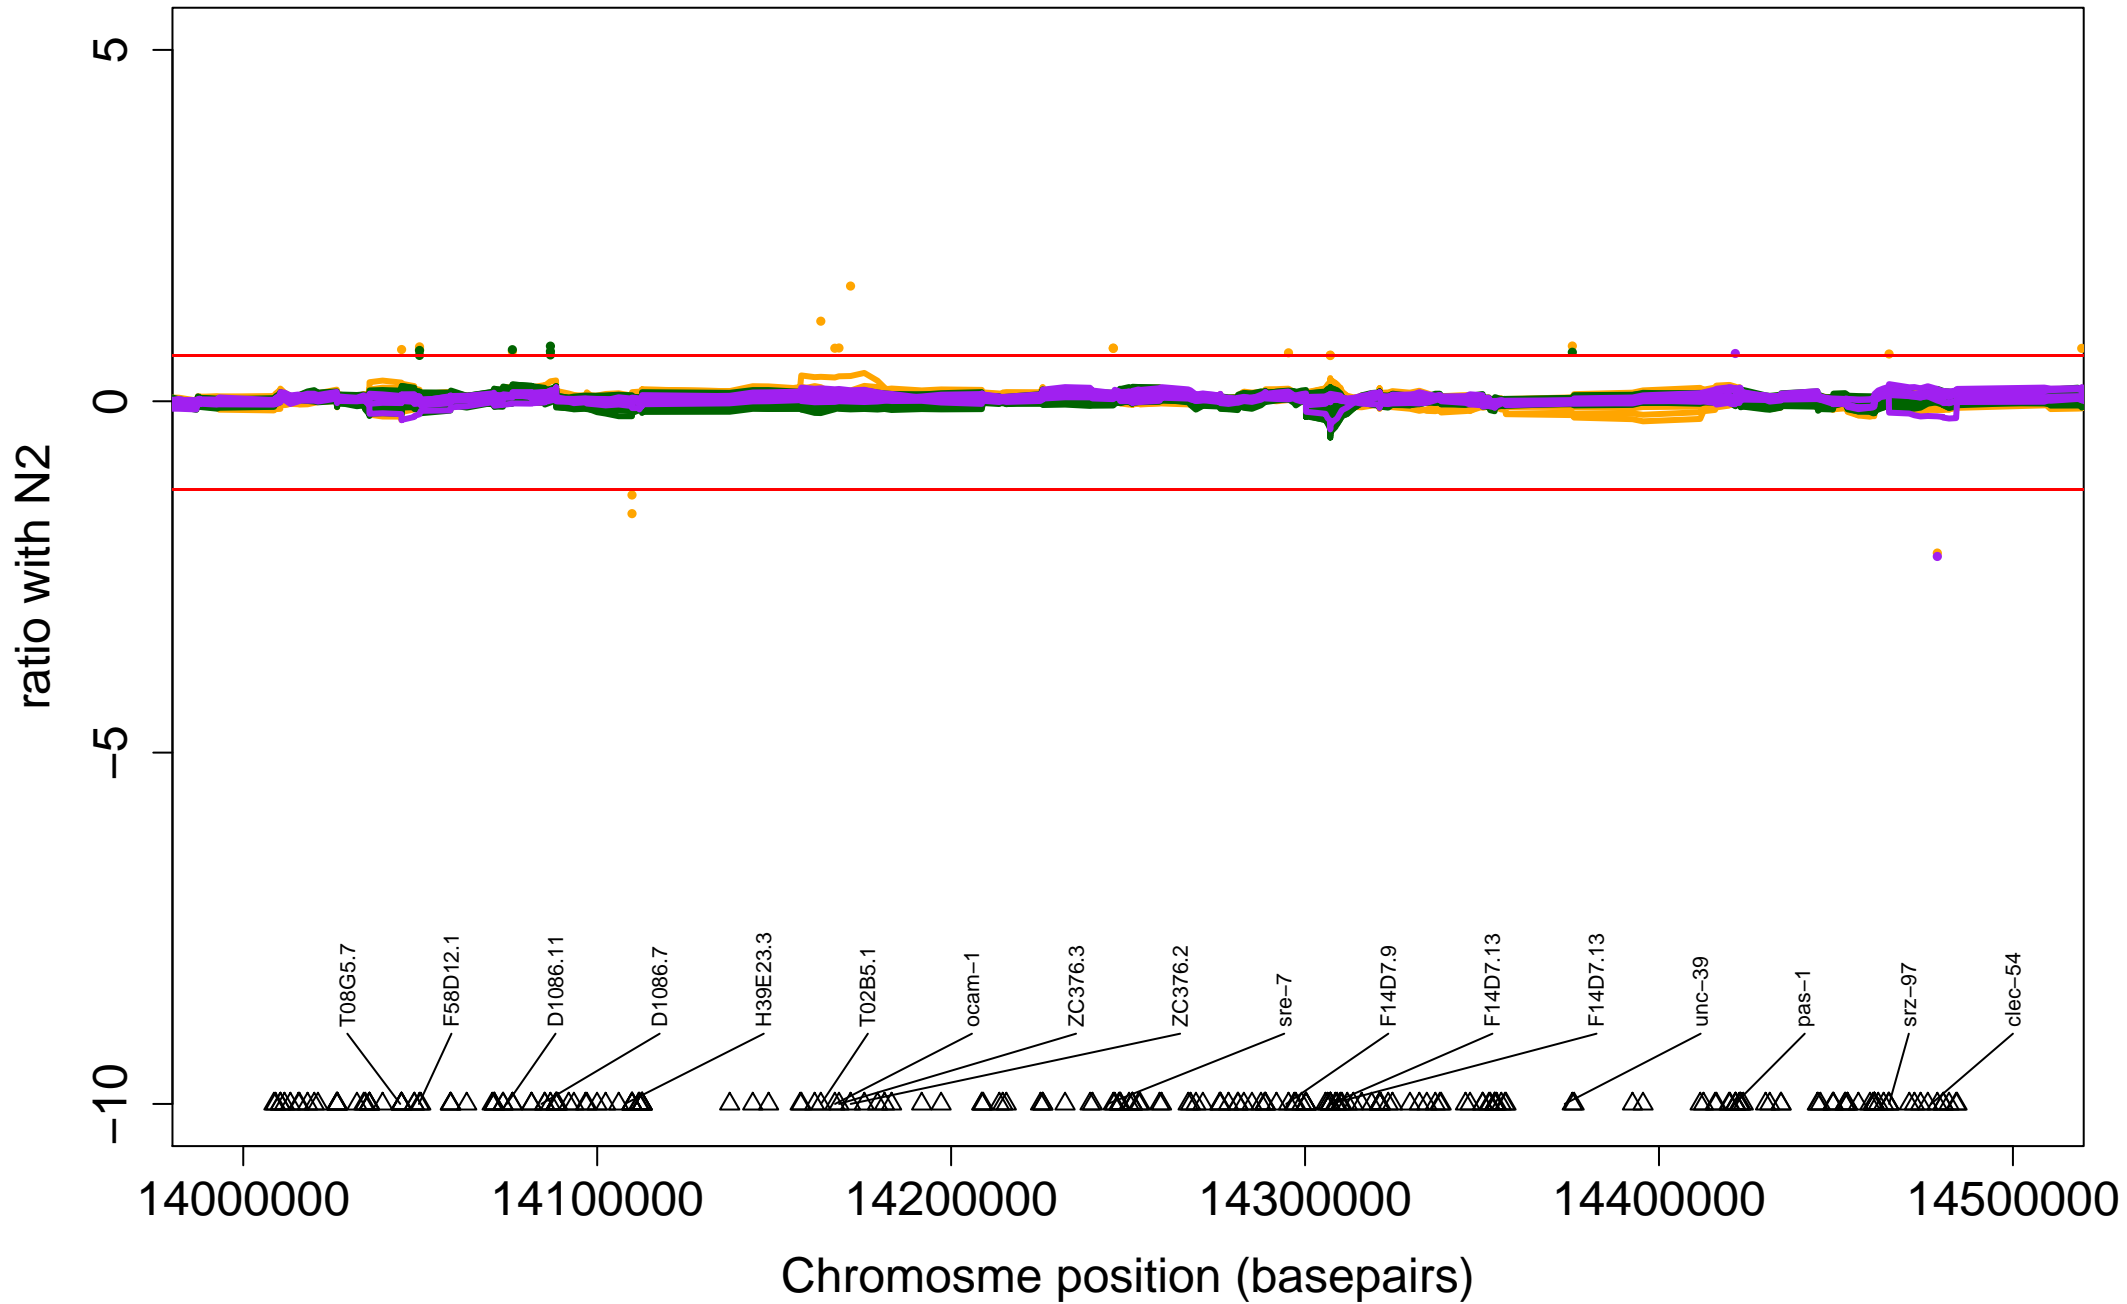

v

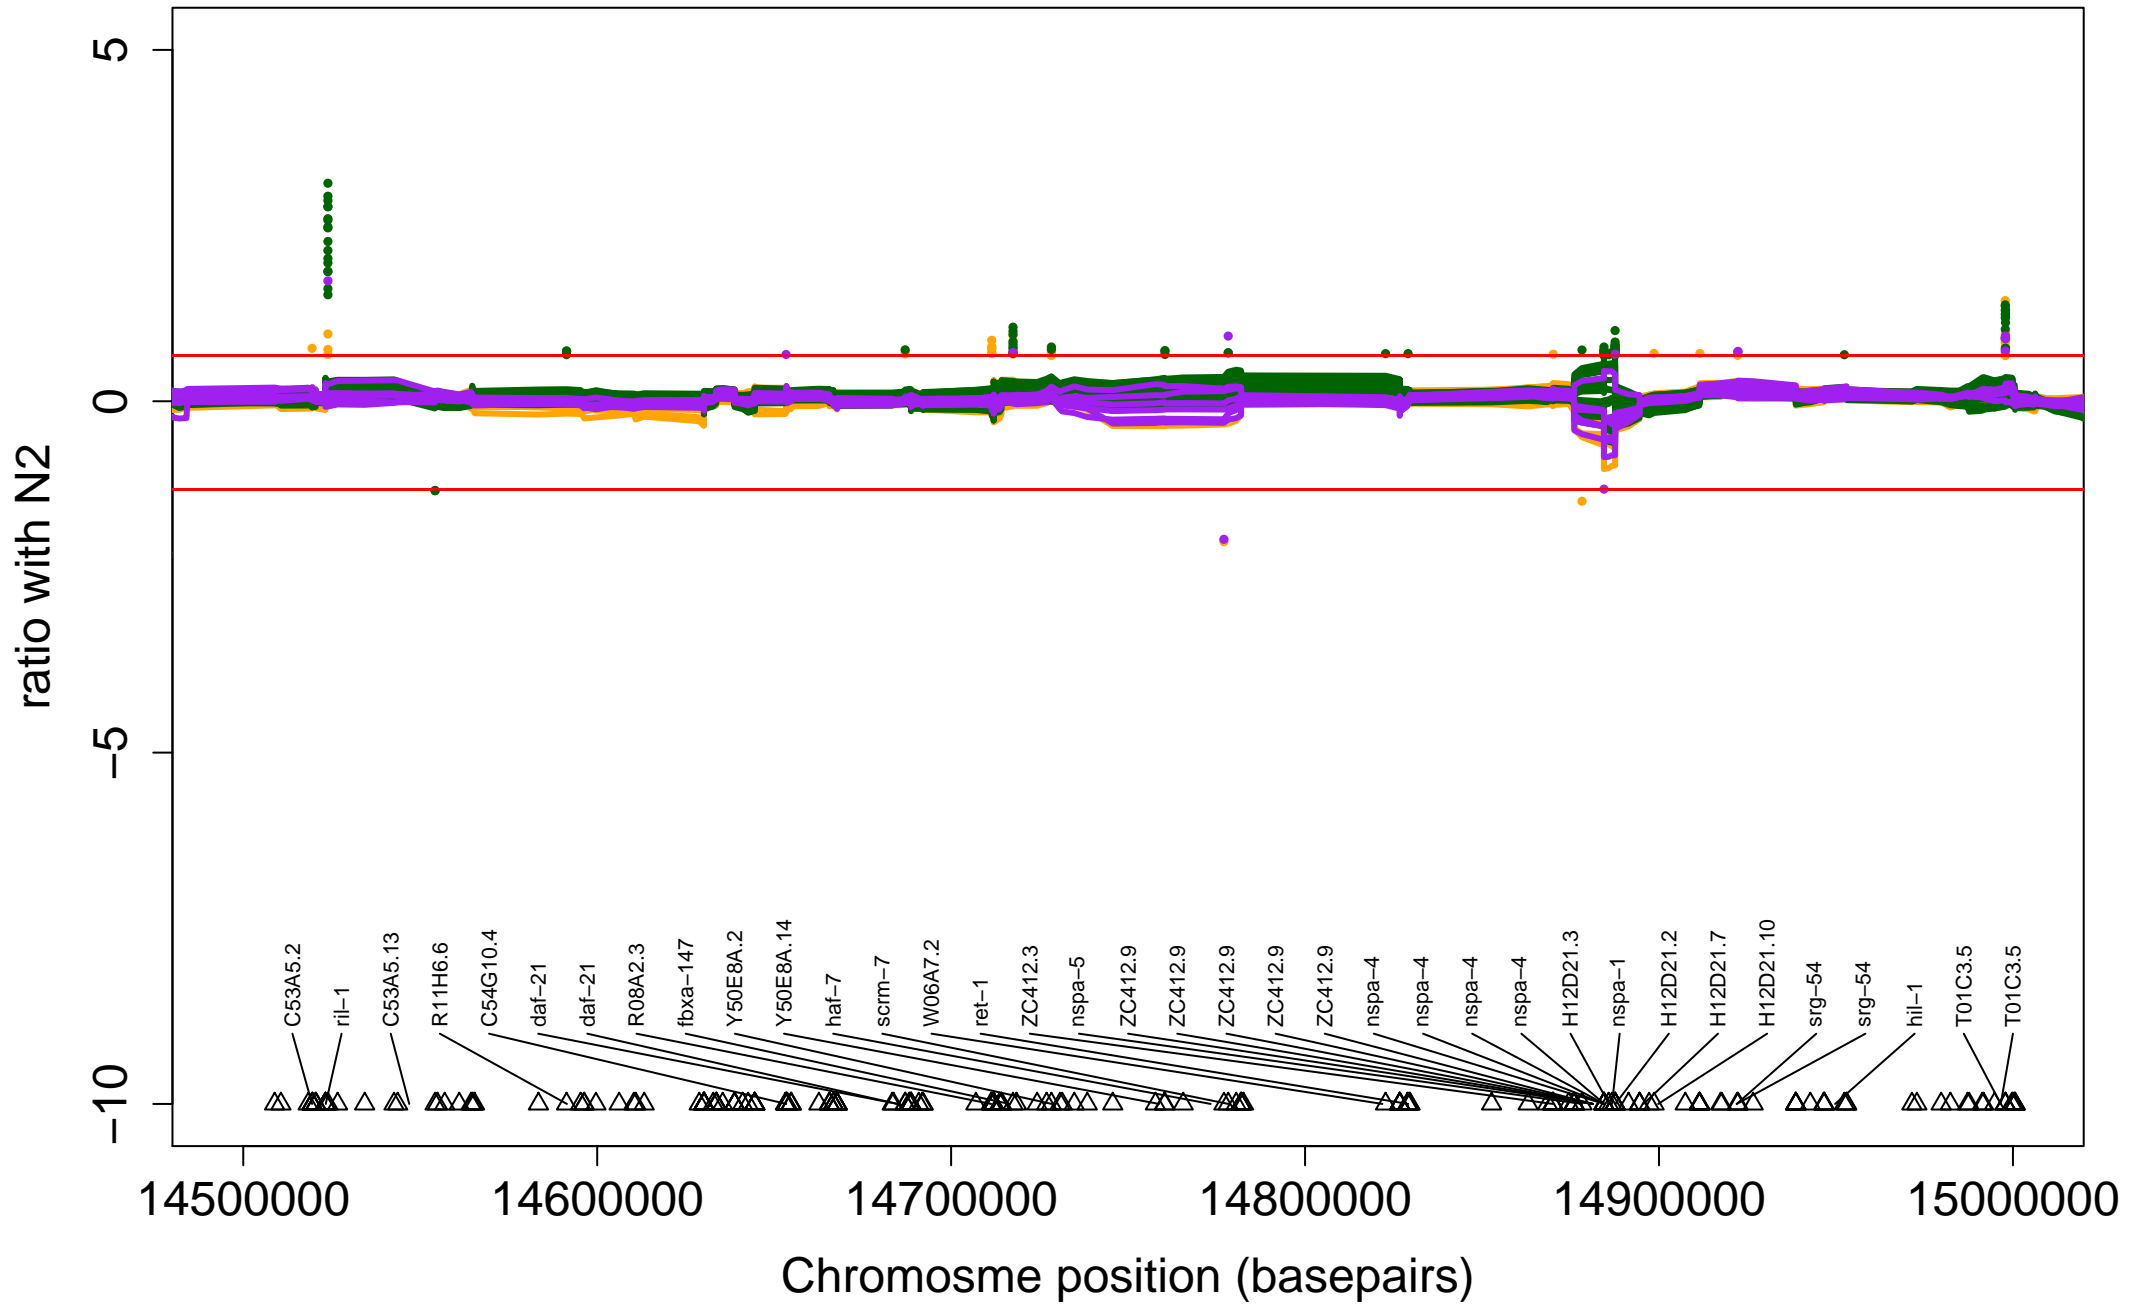

v

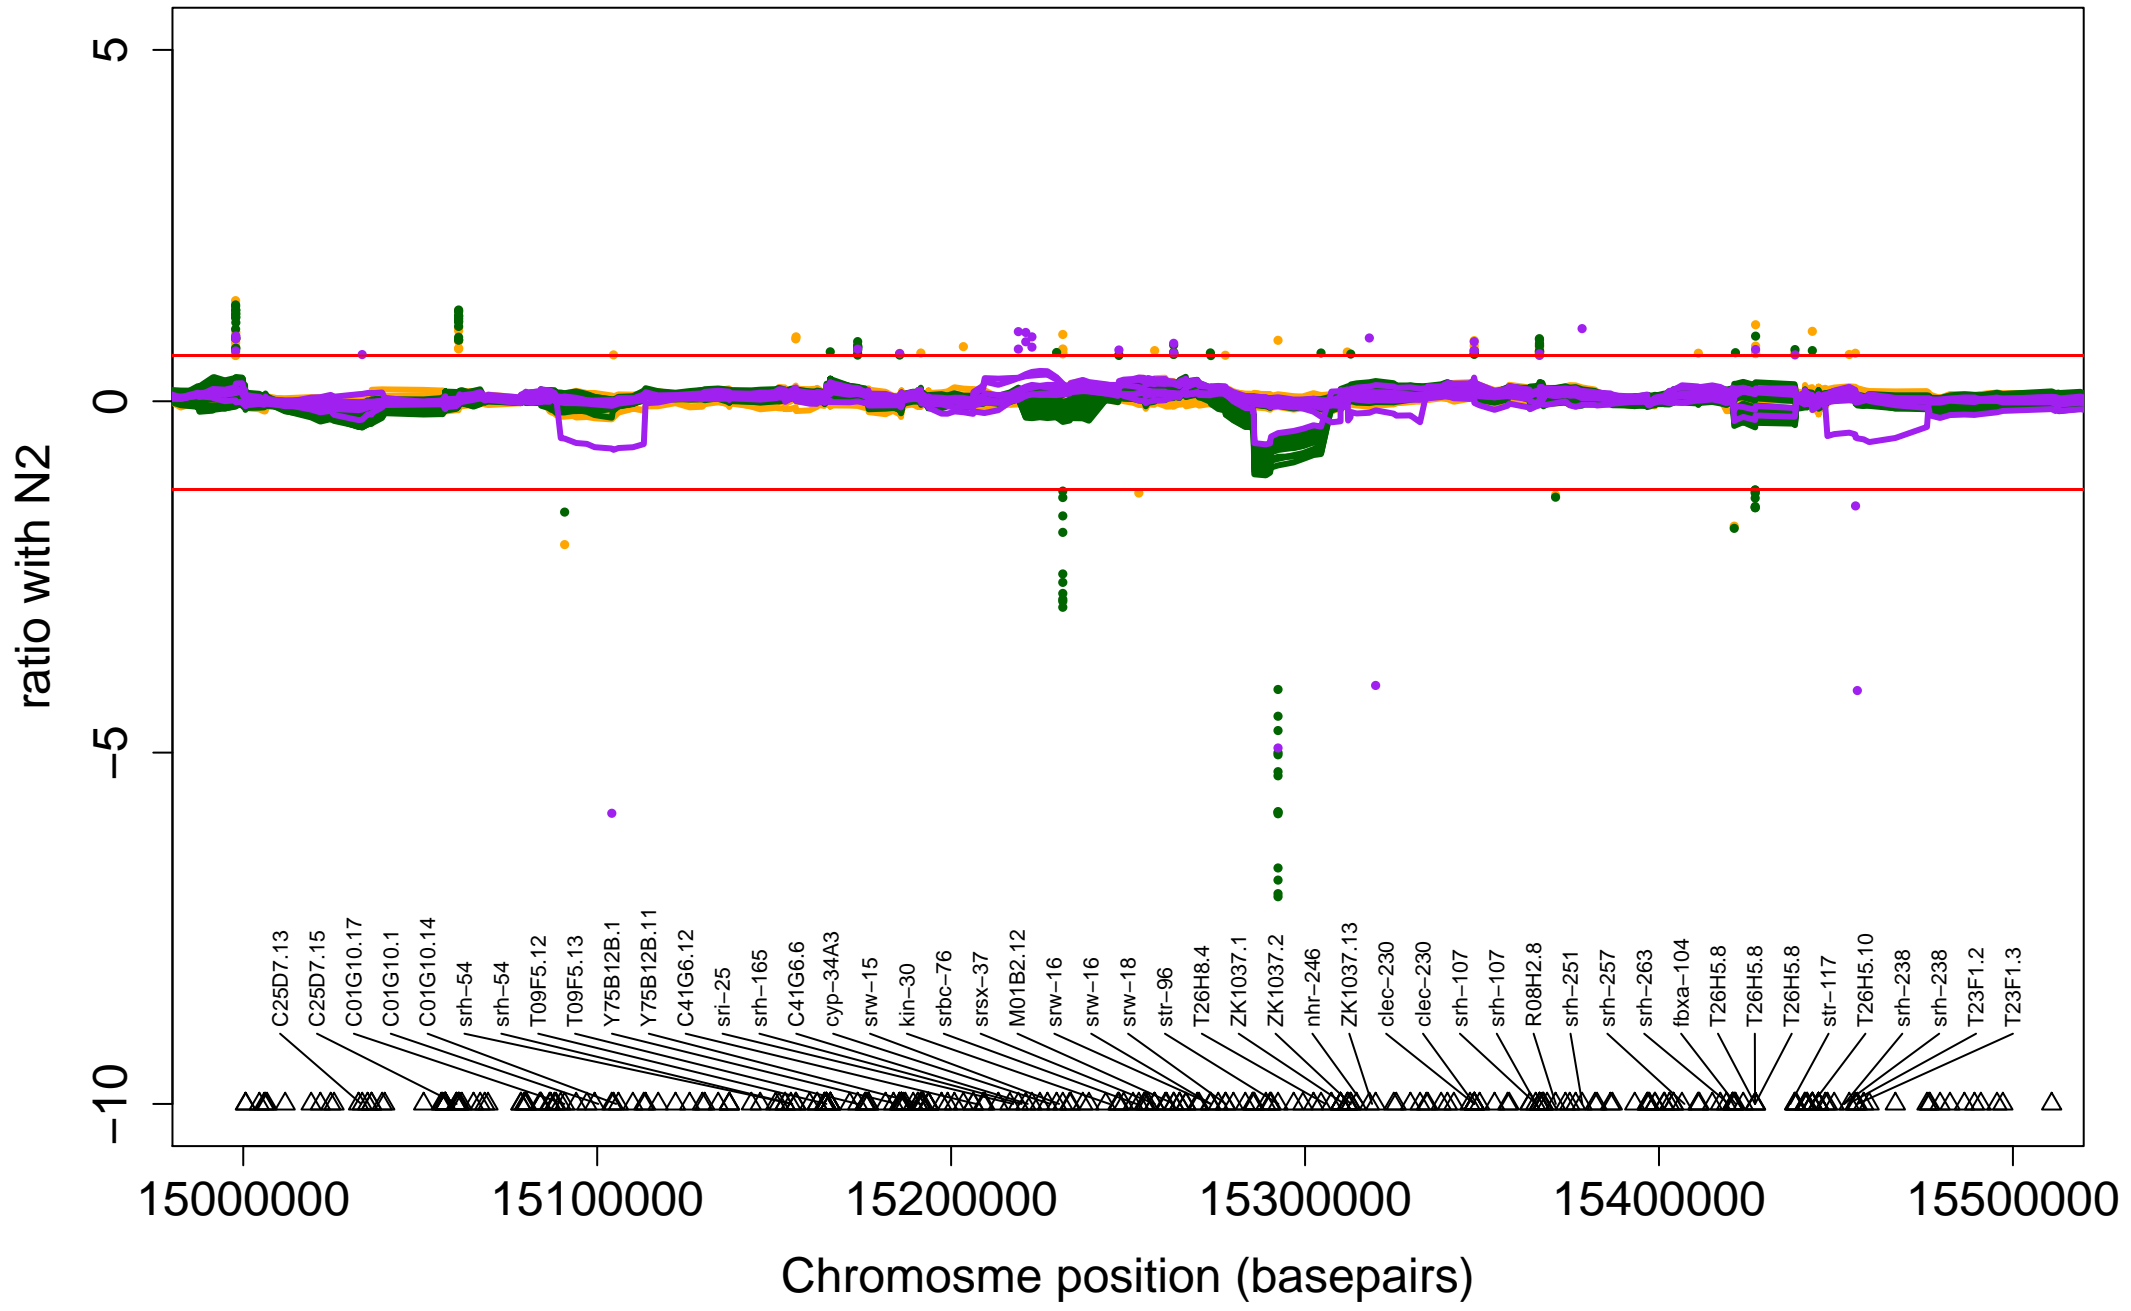





V

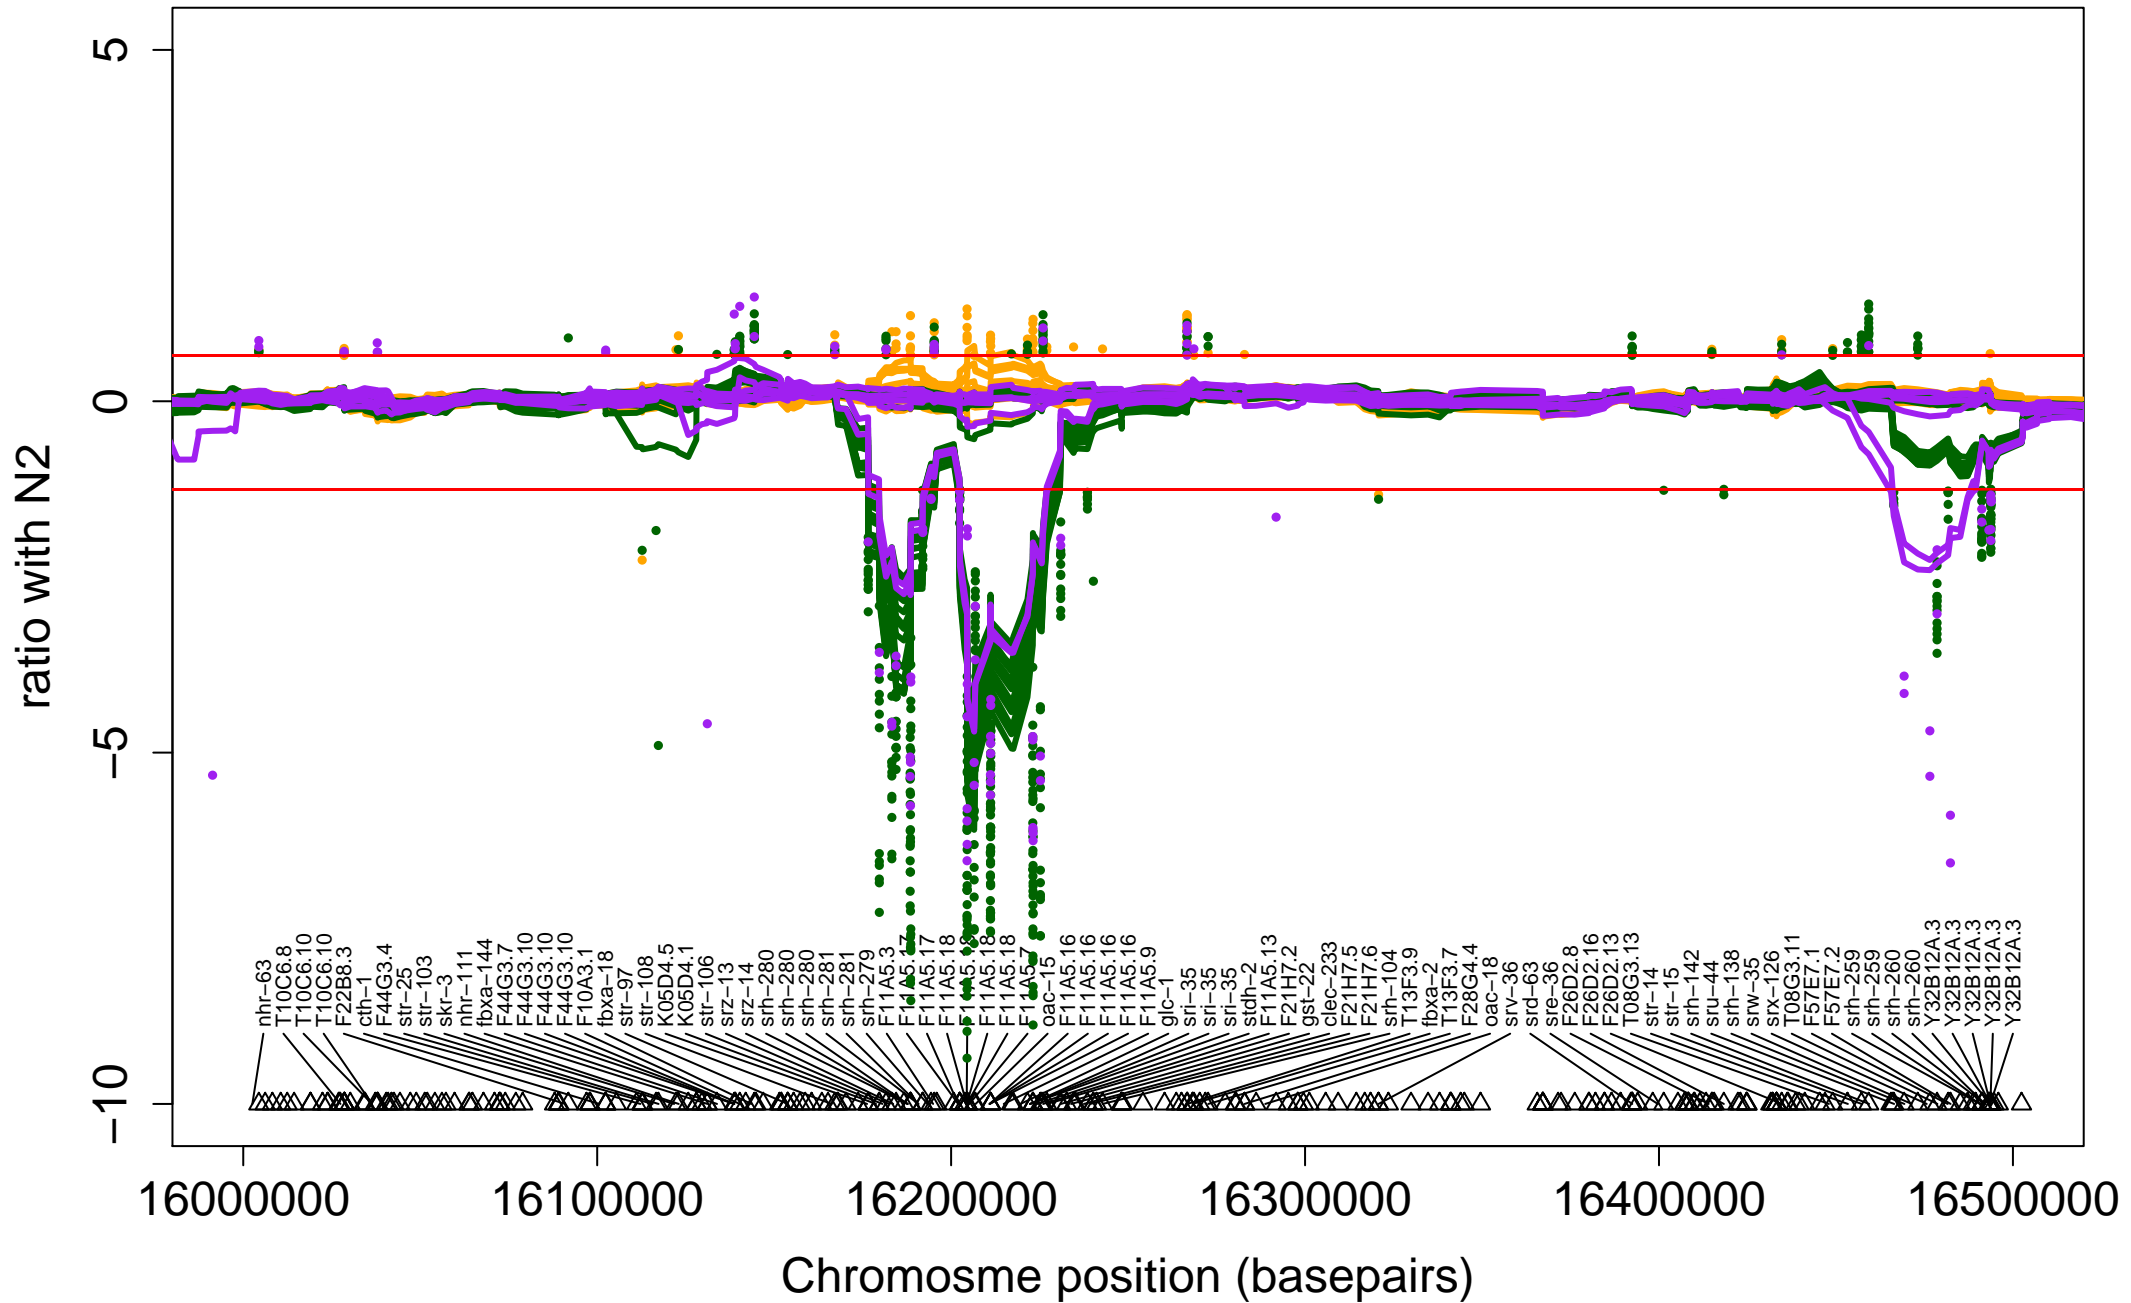

v

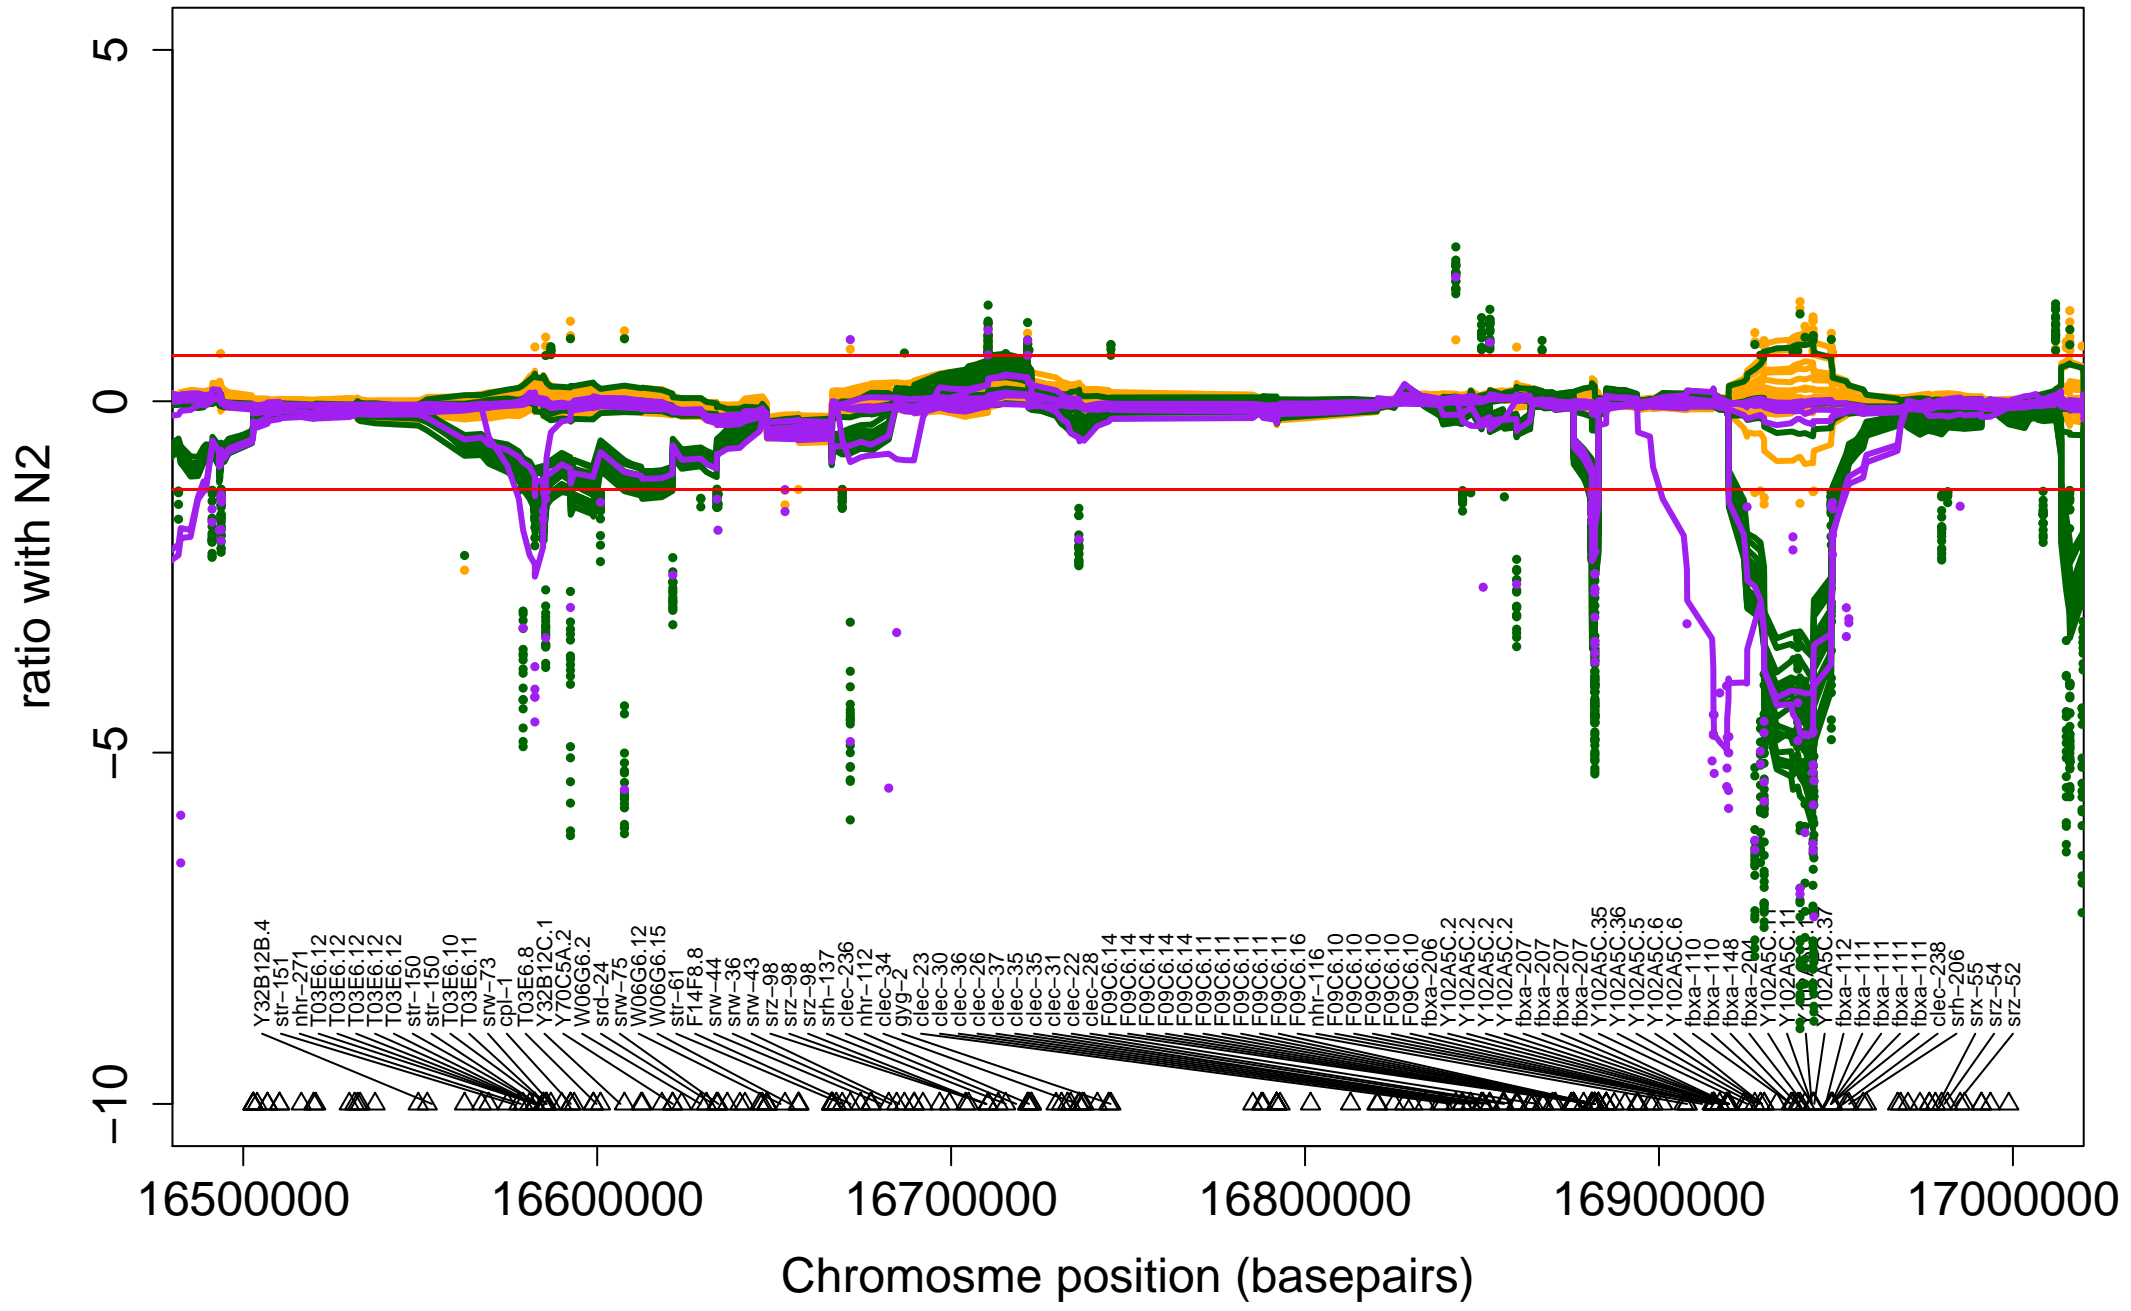

v

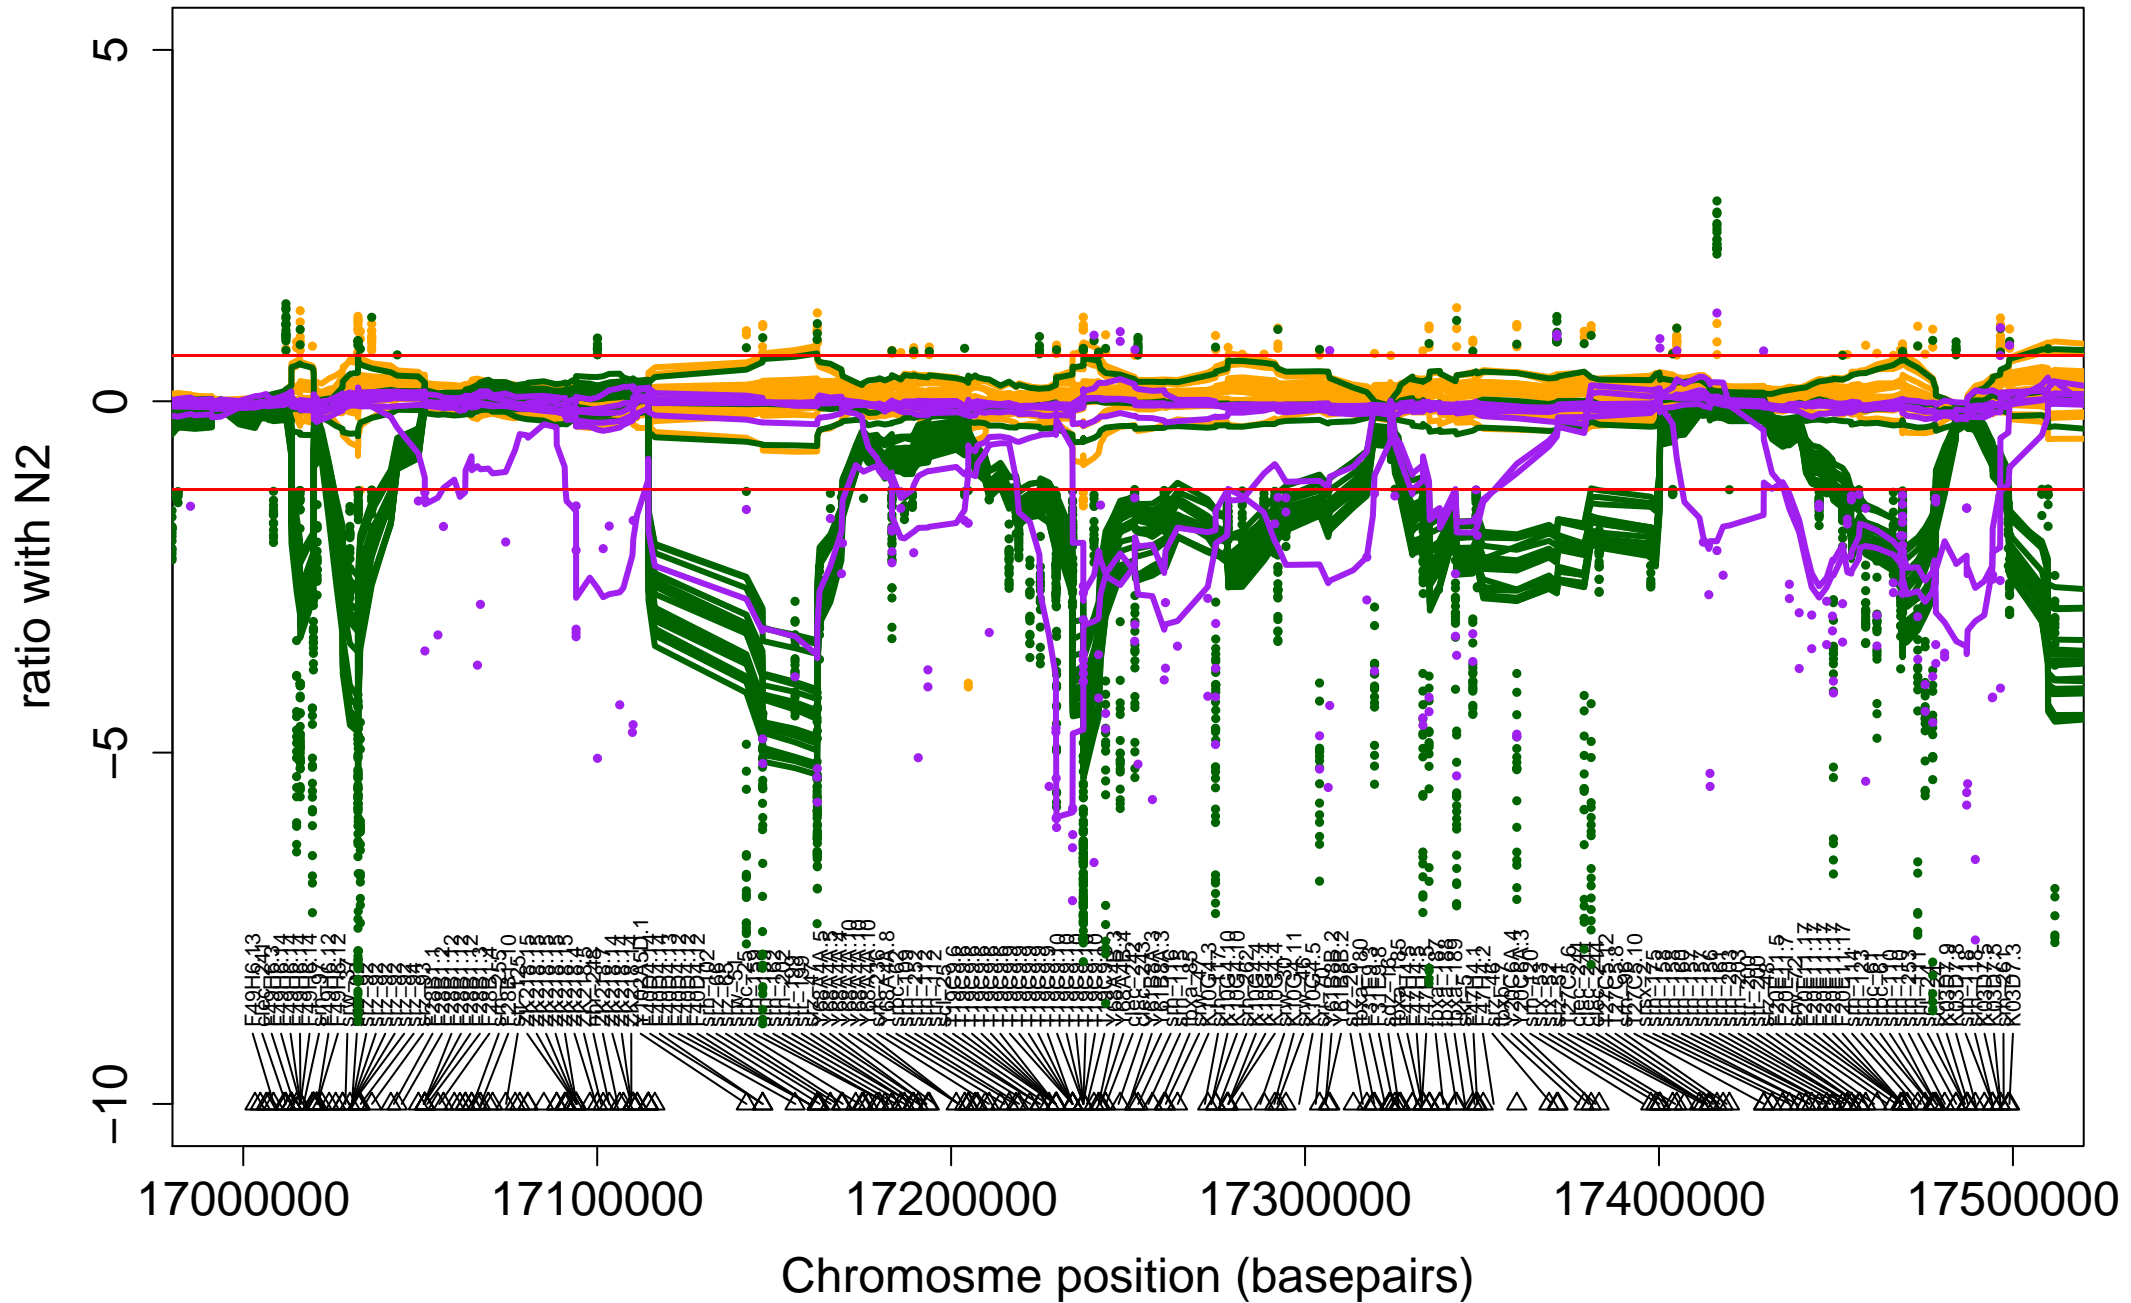

v

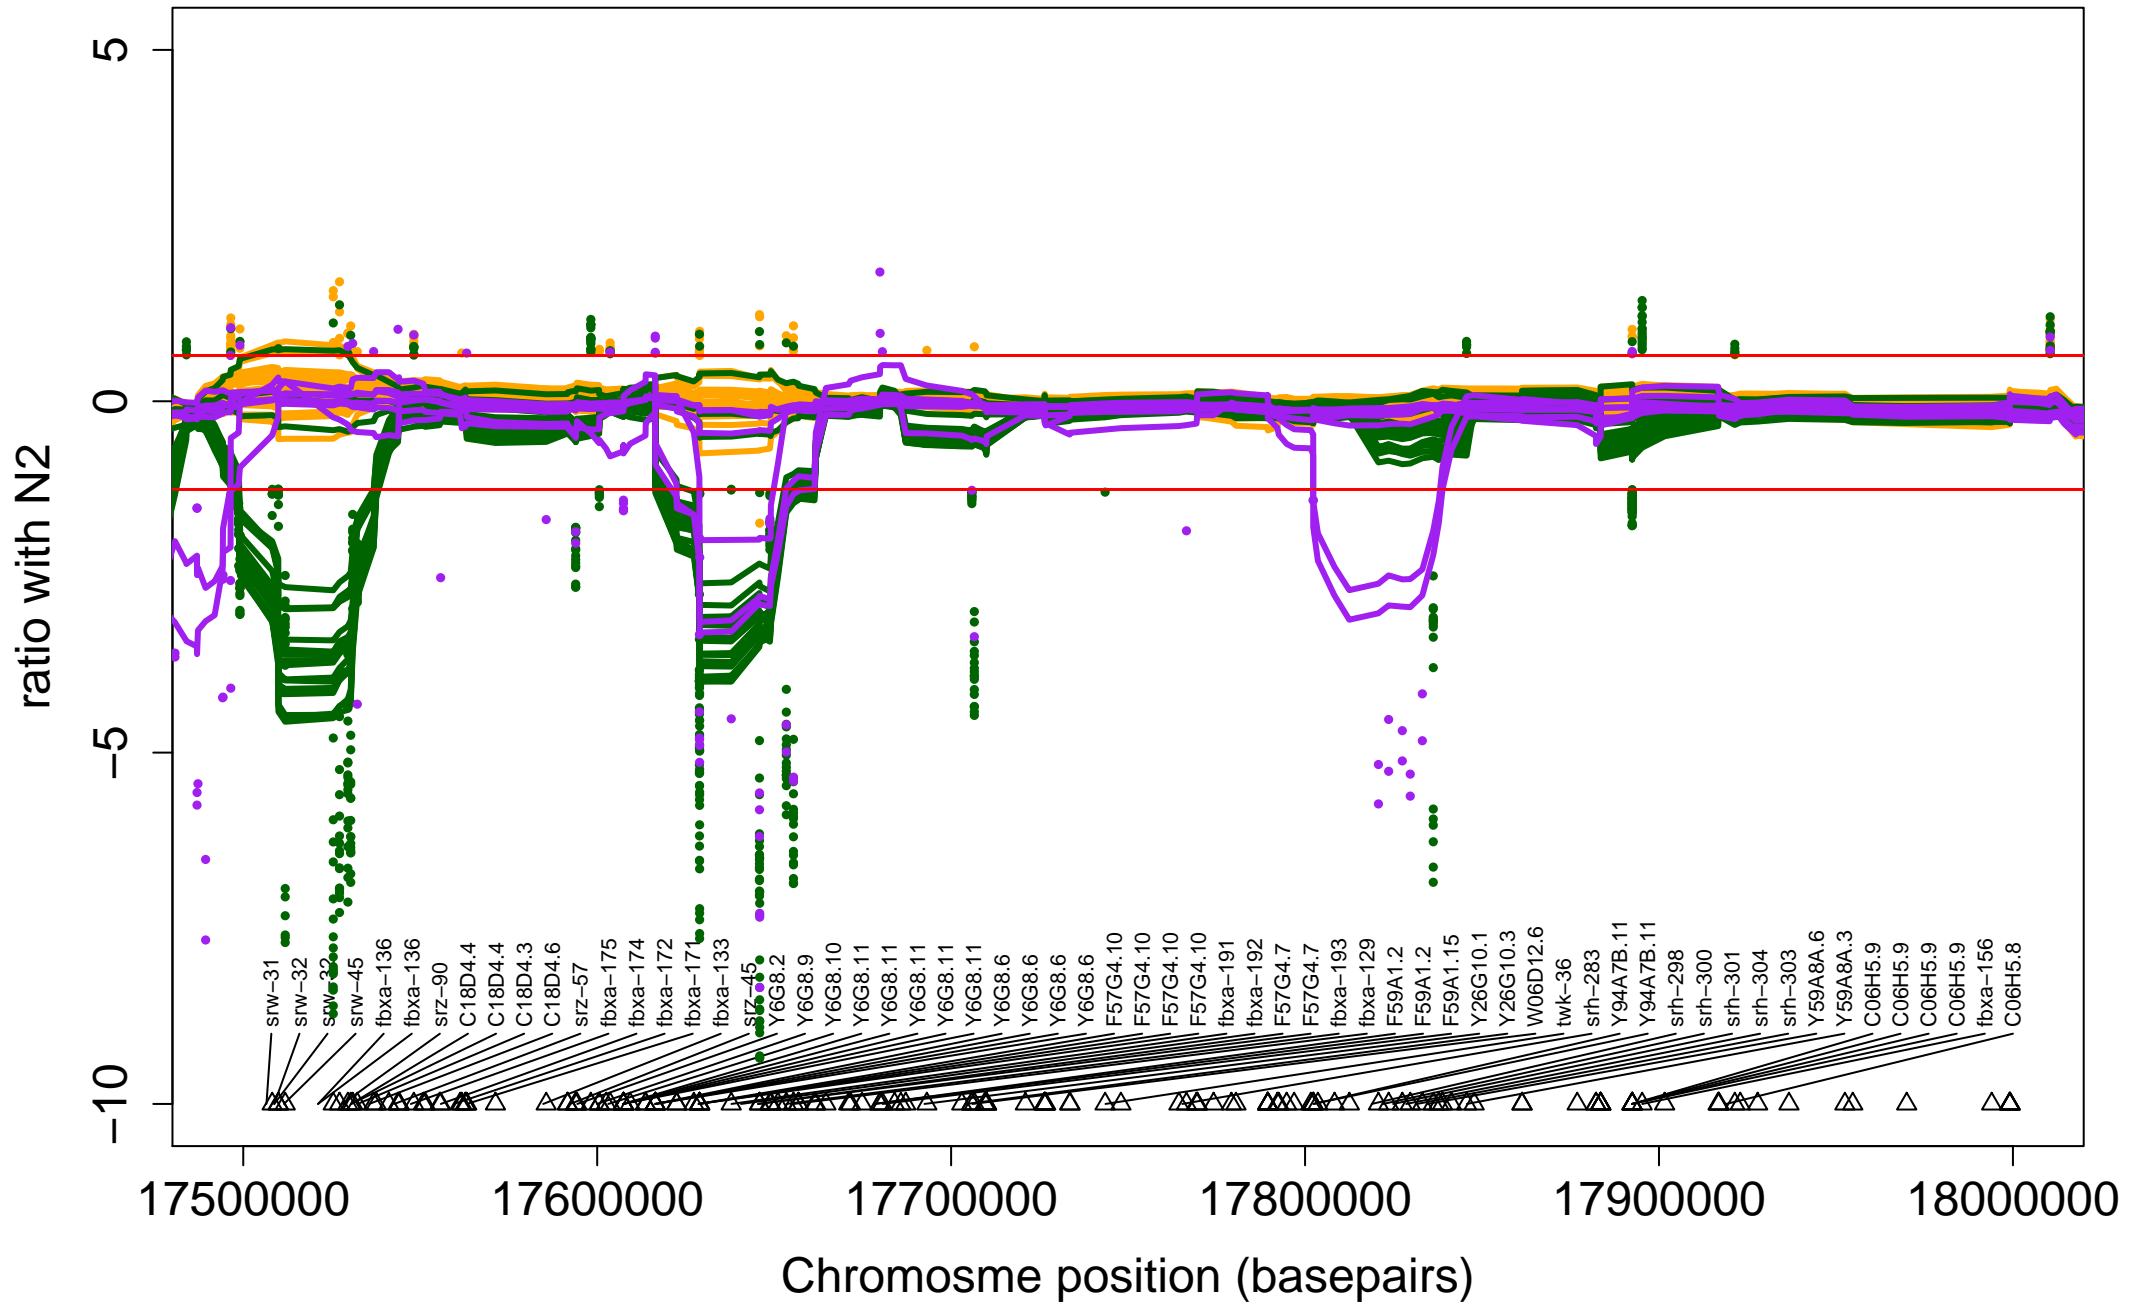





v

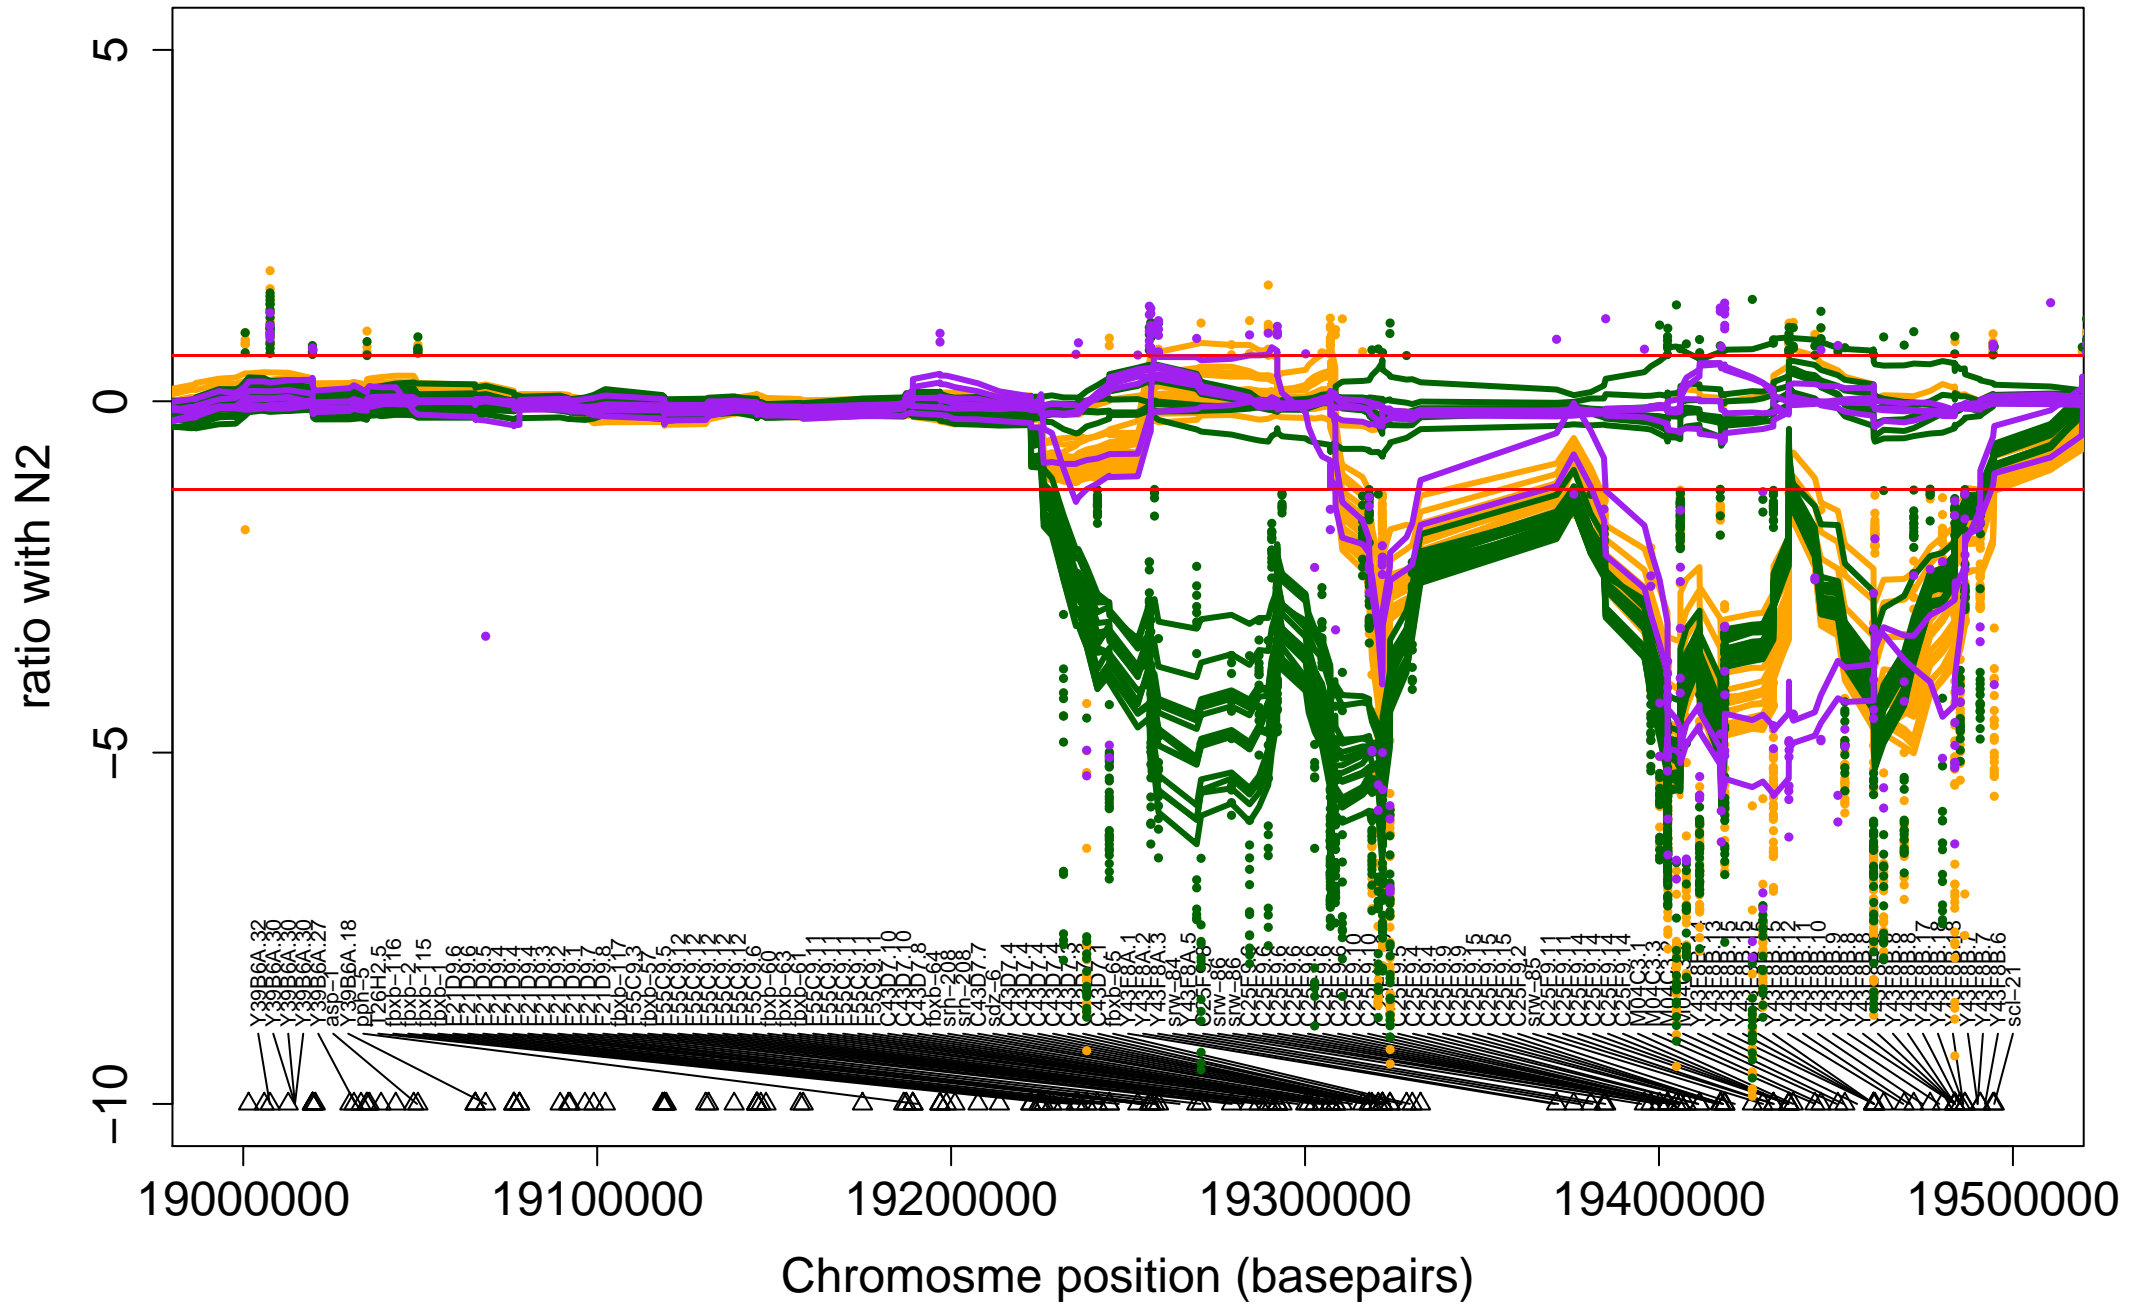

v

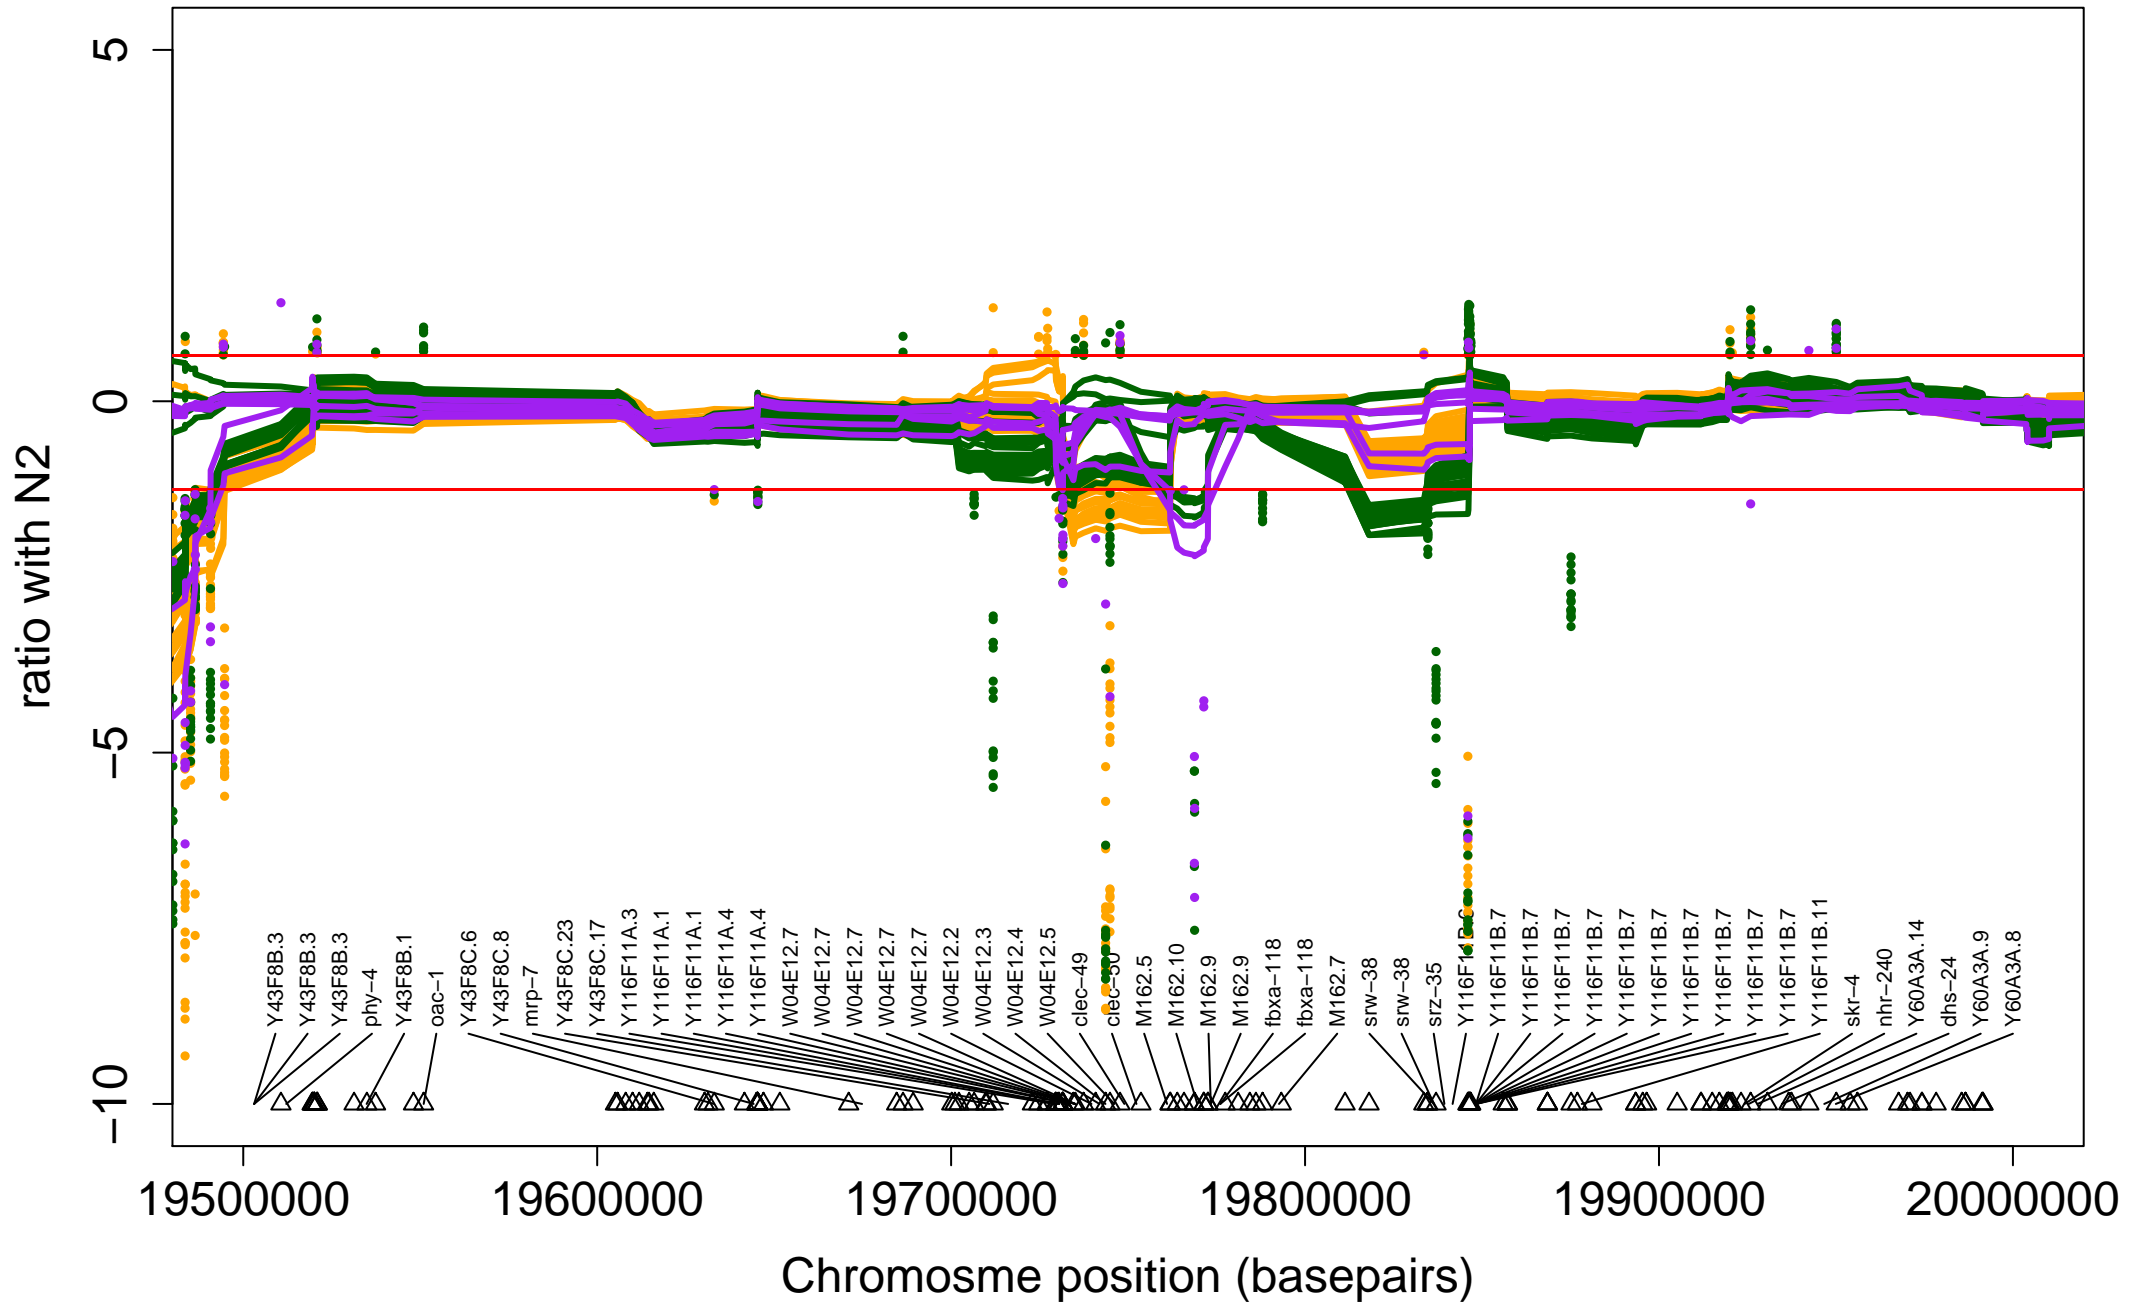



V

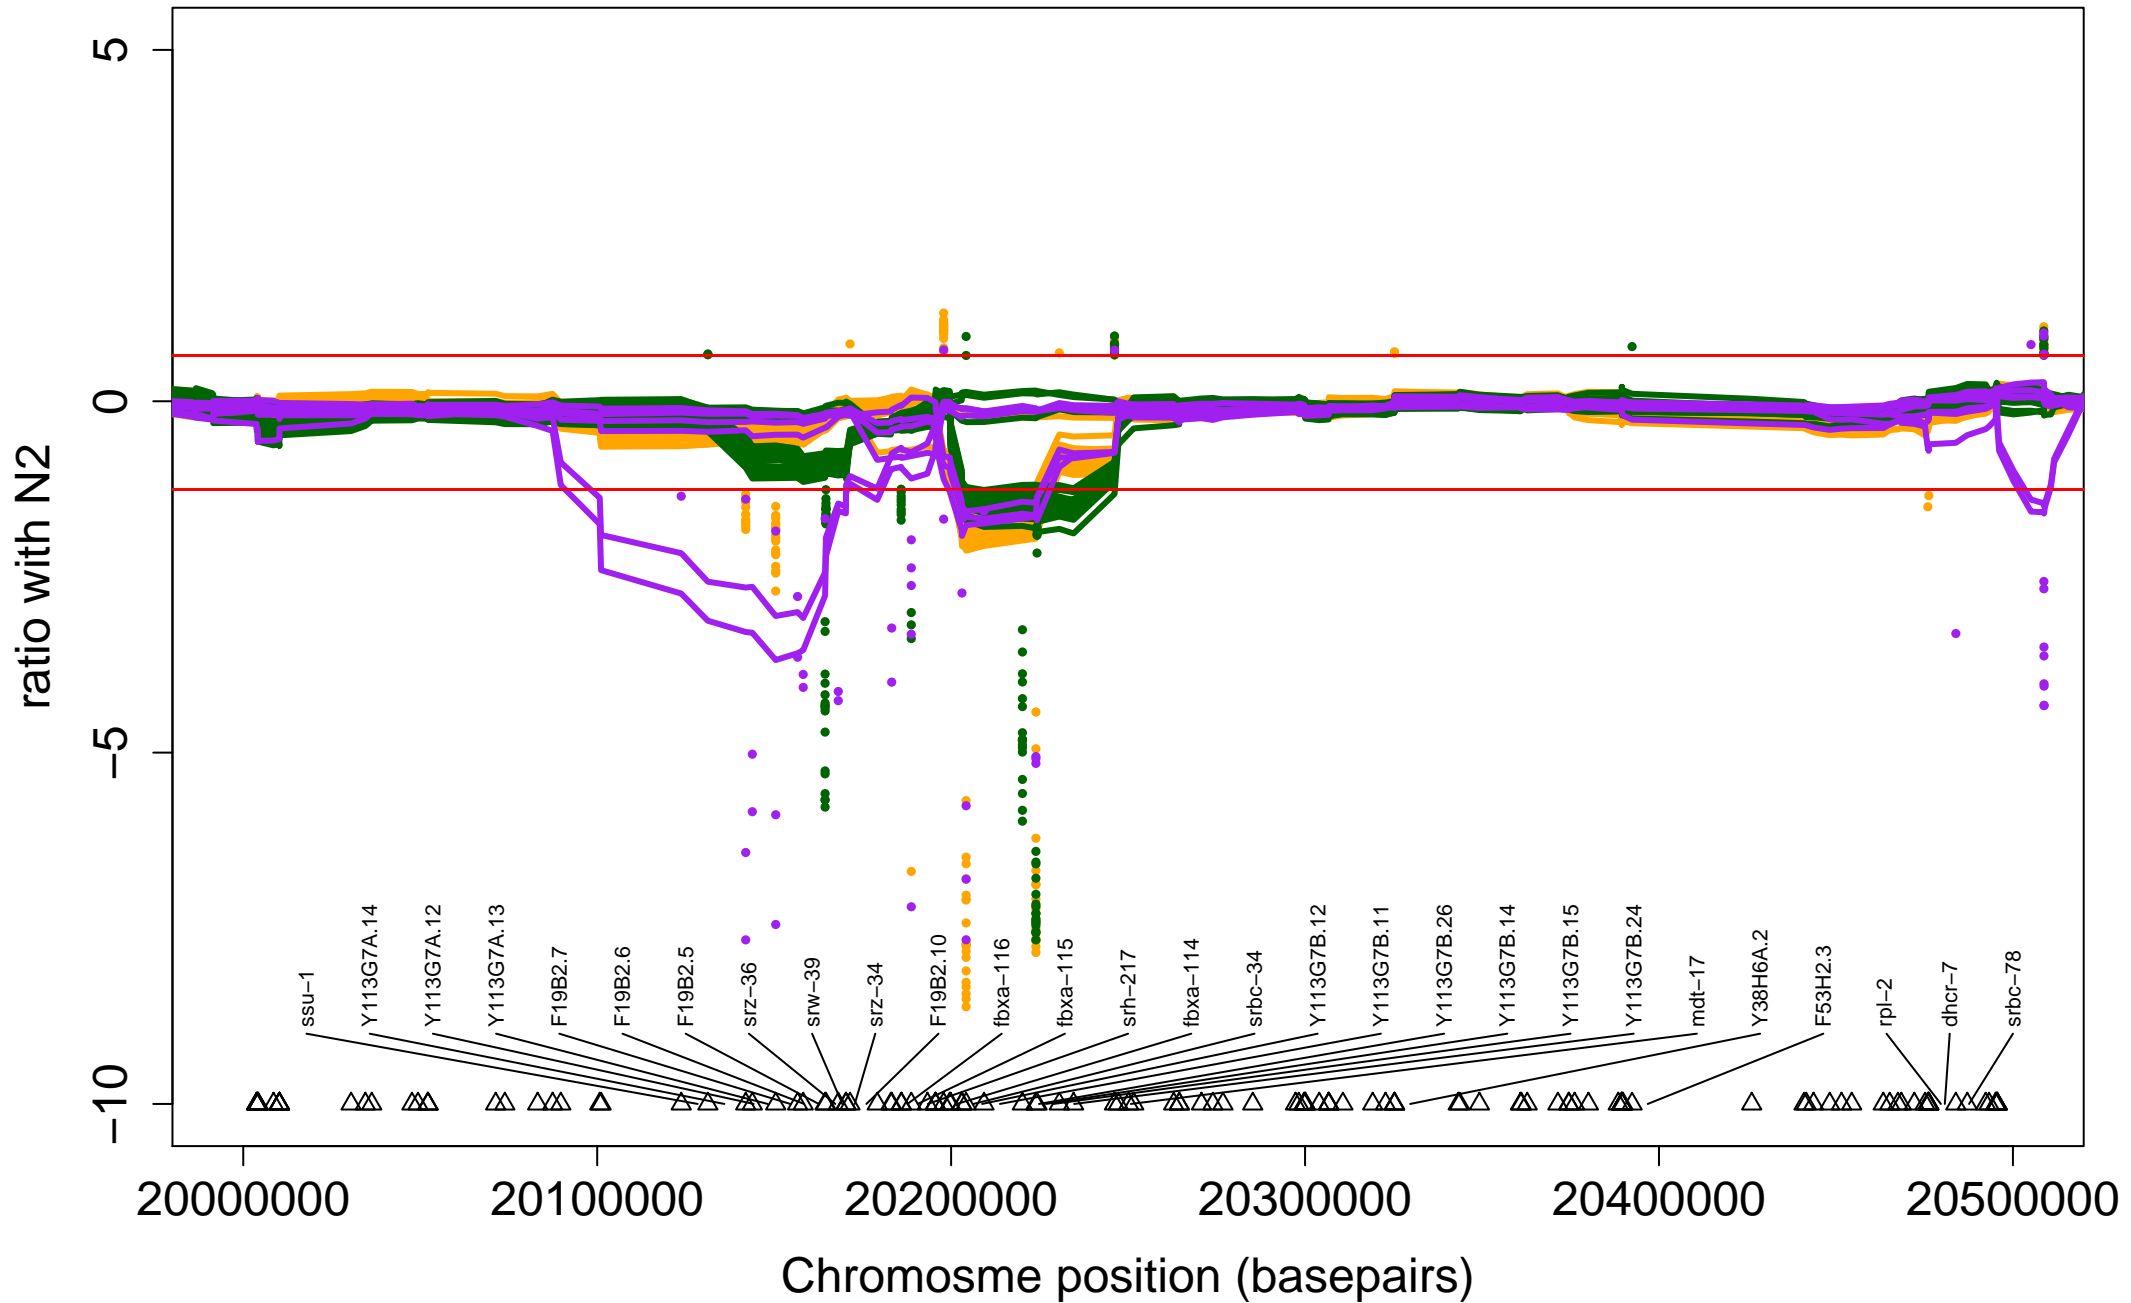

v

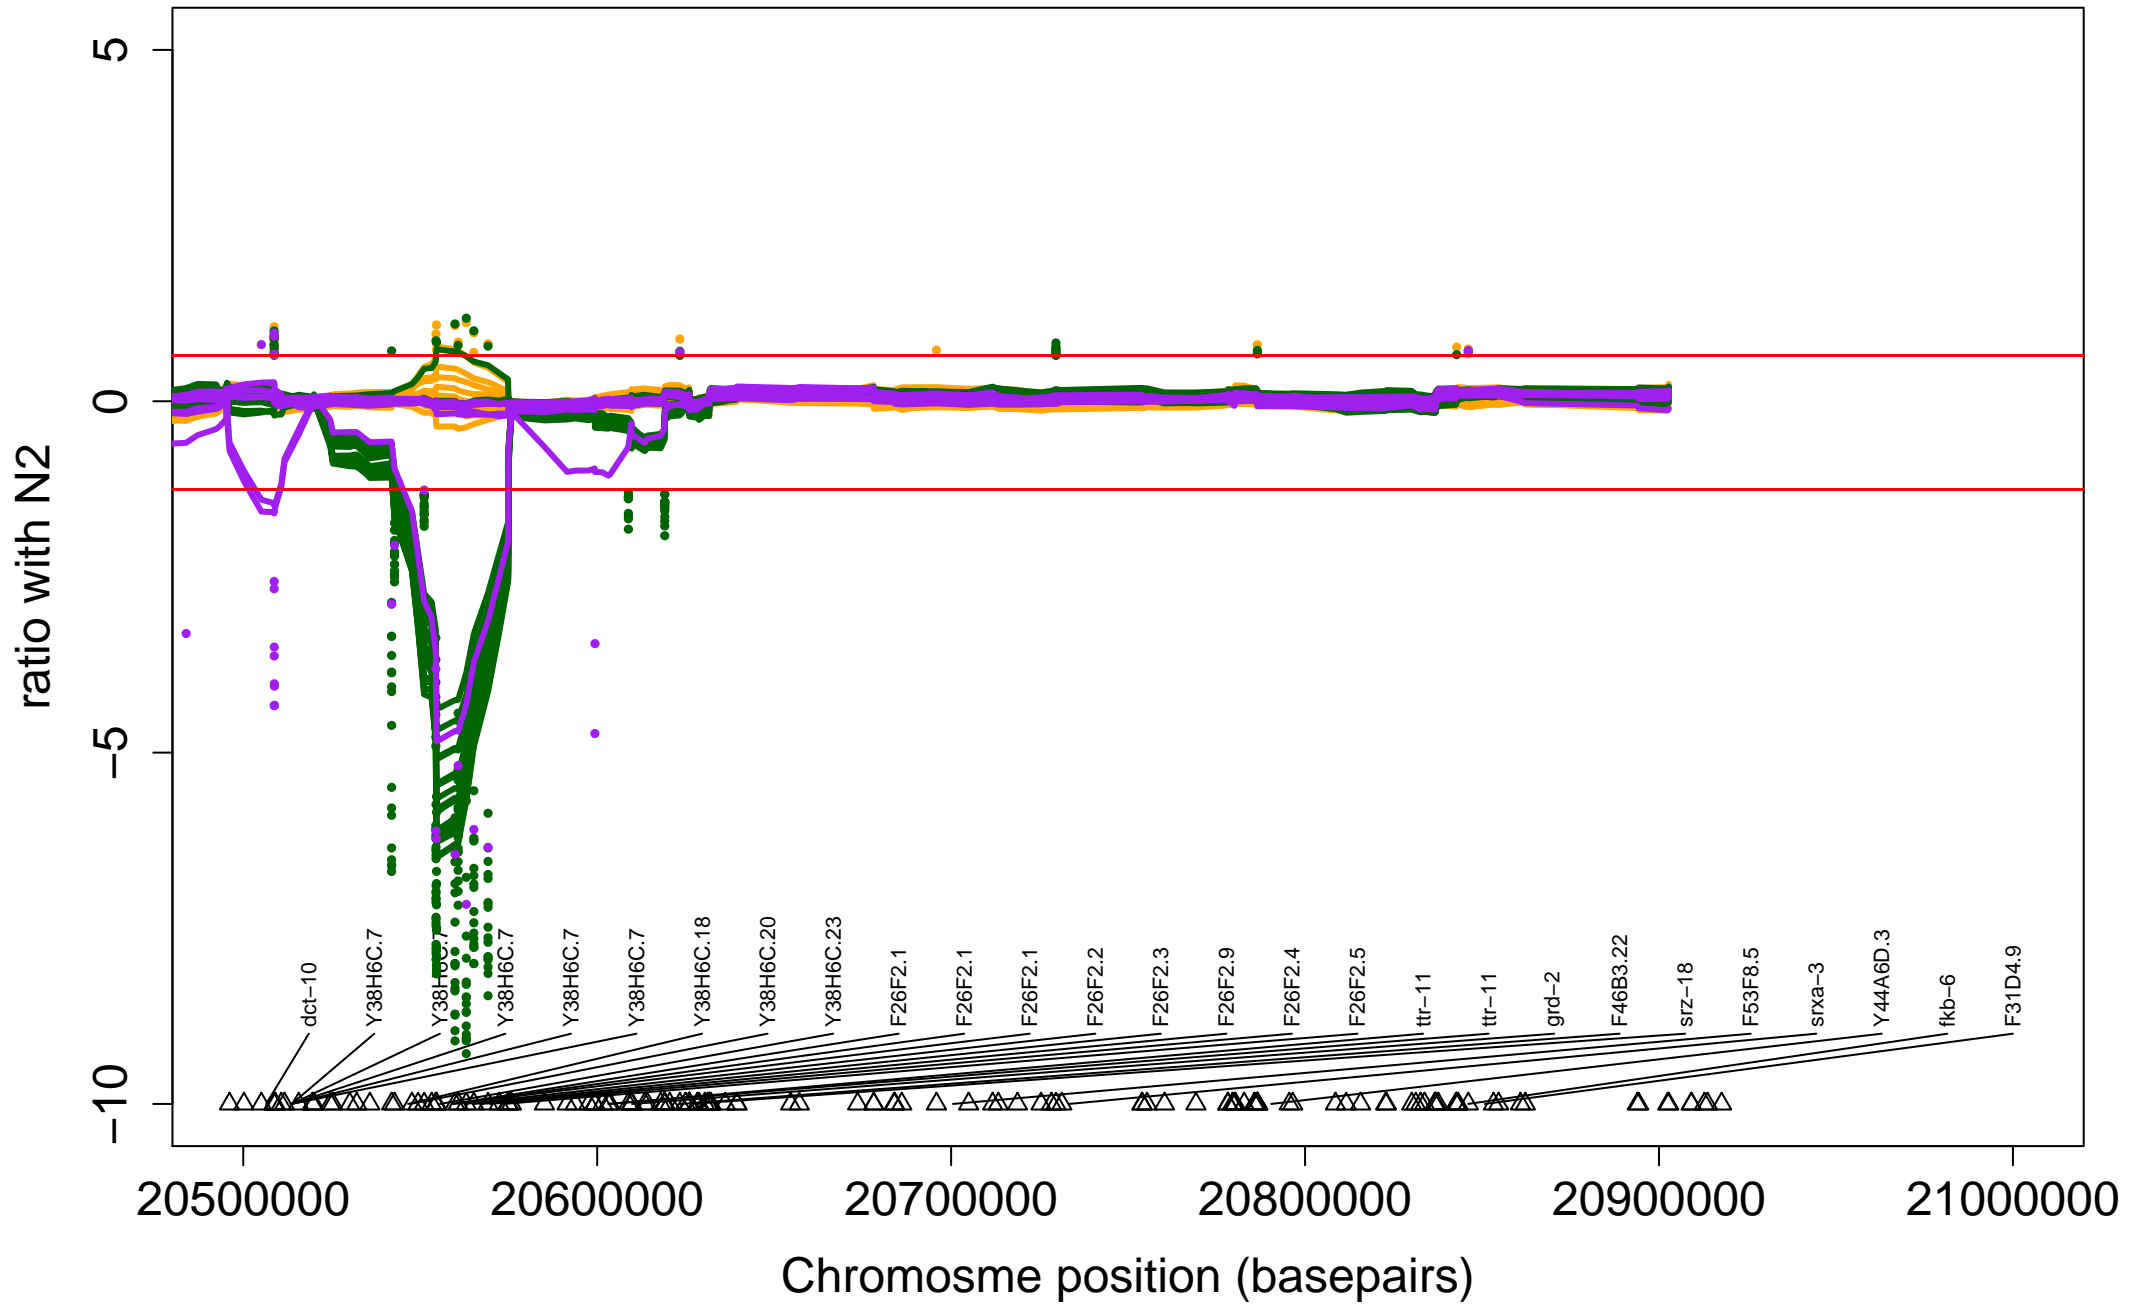



X

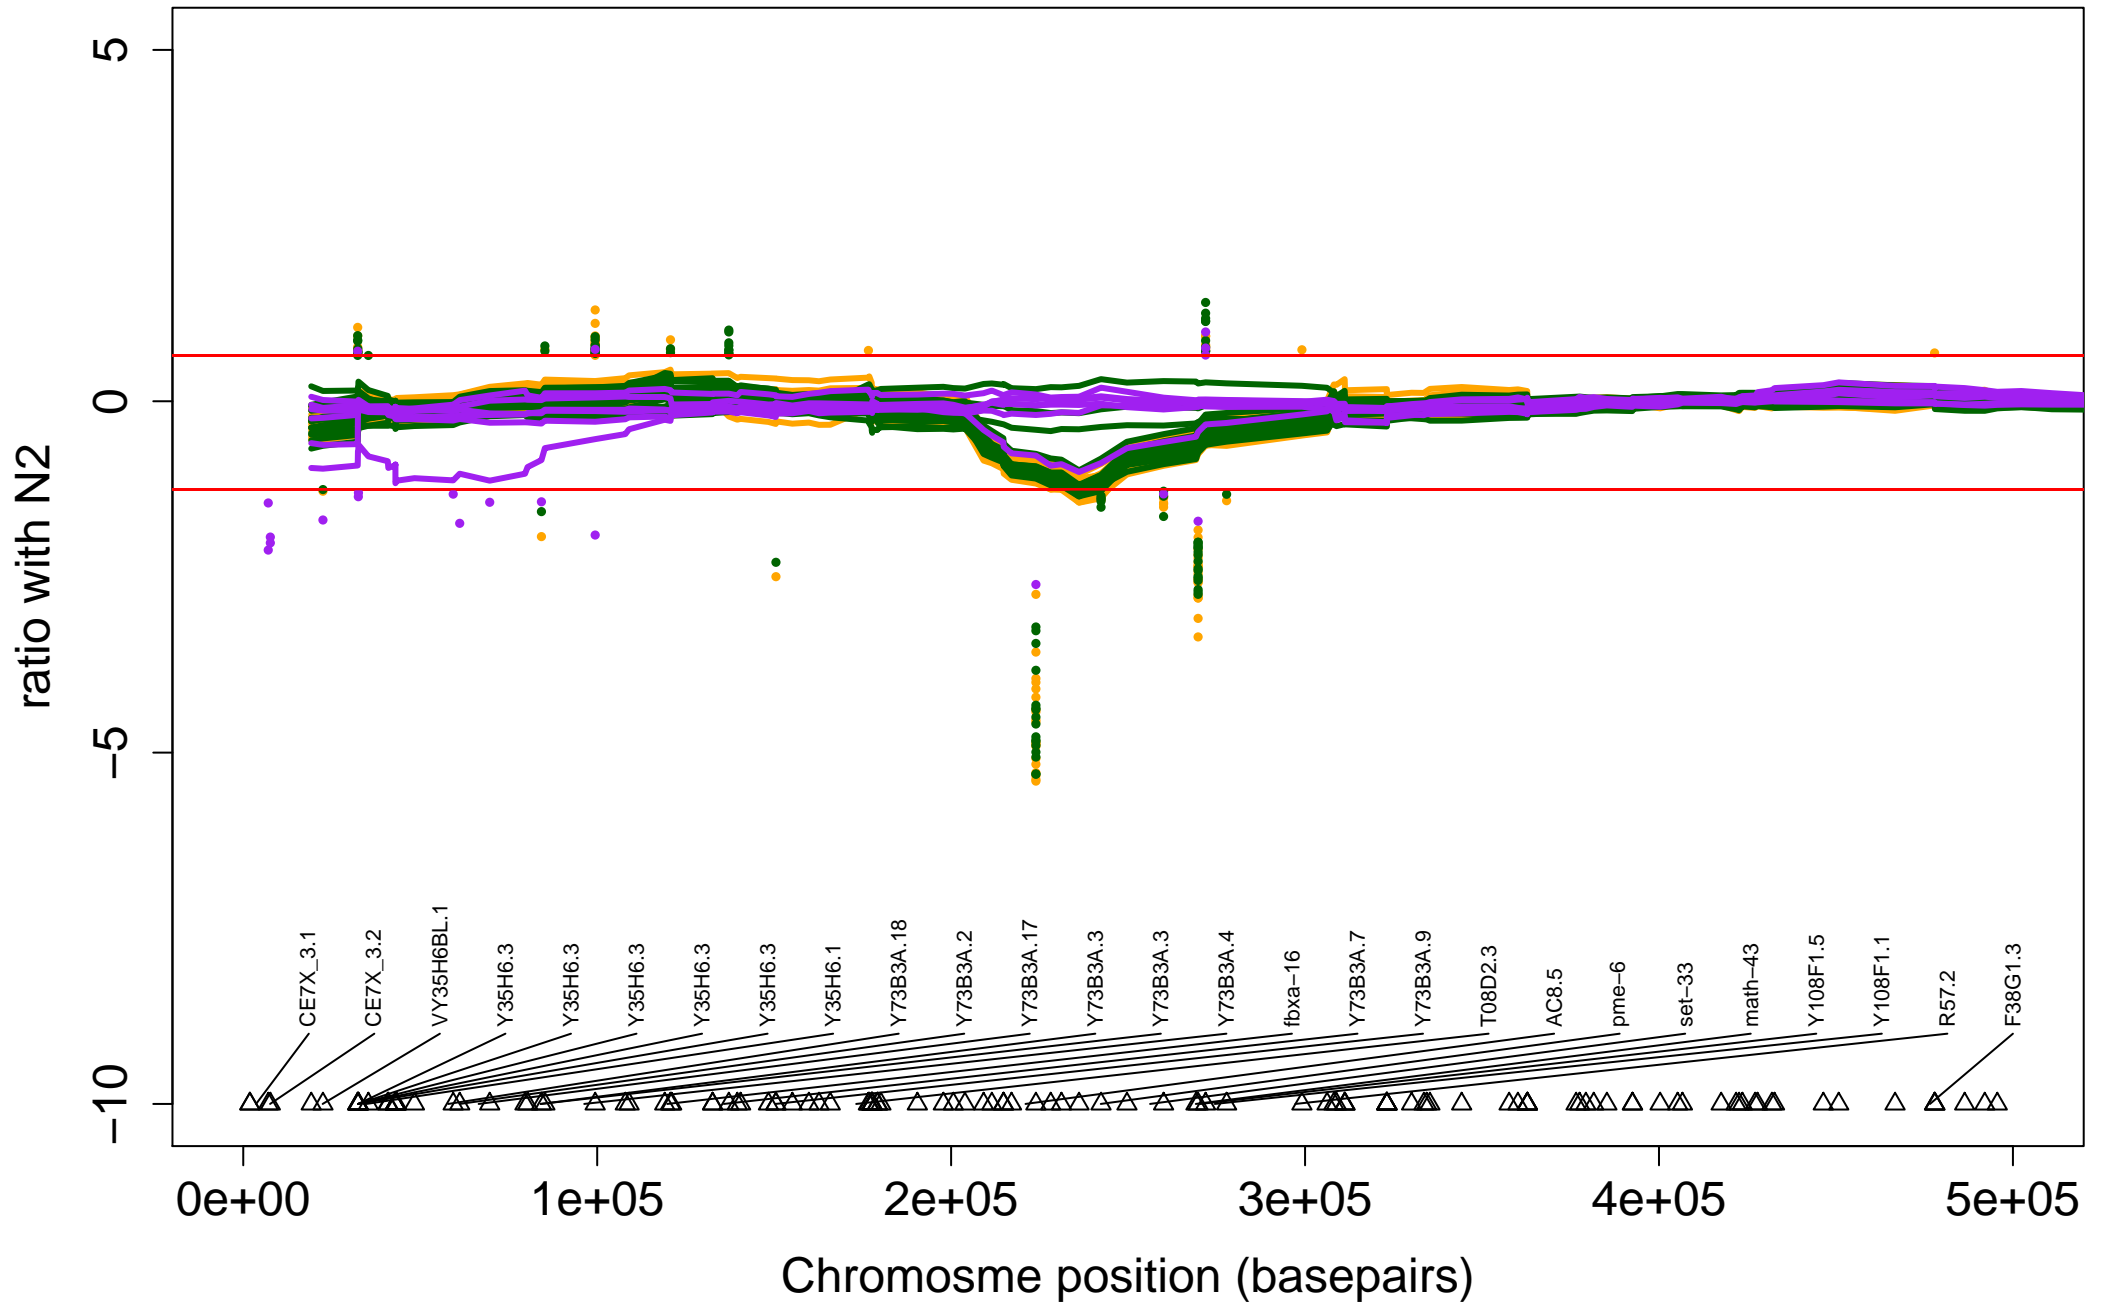

X

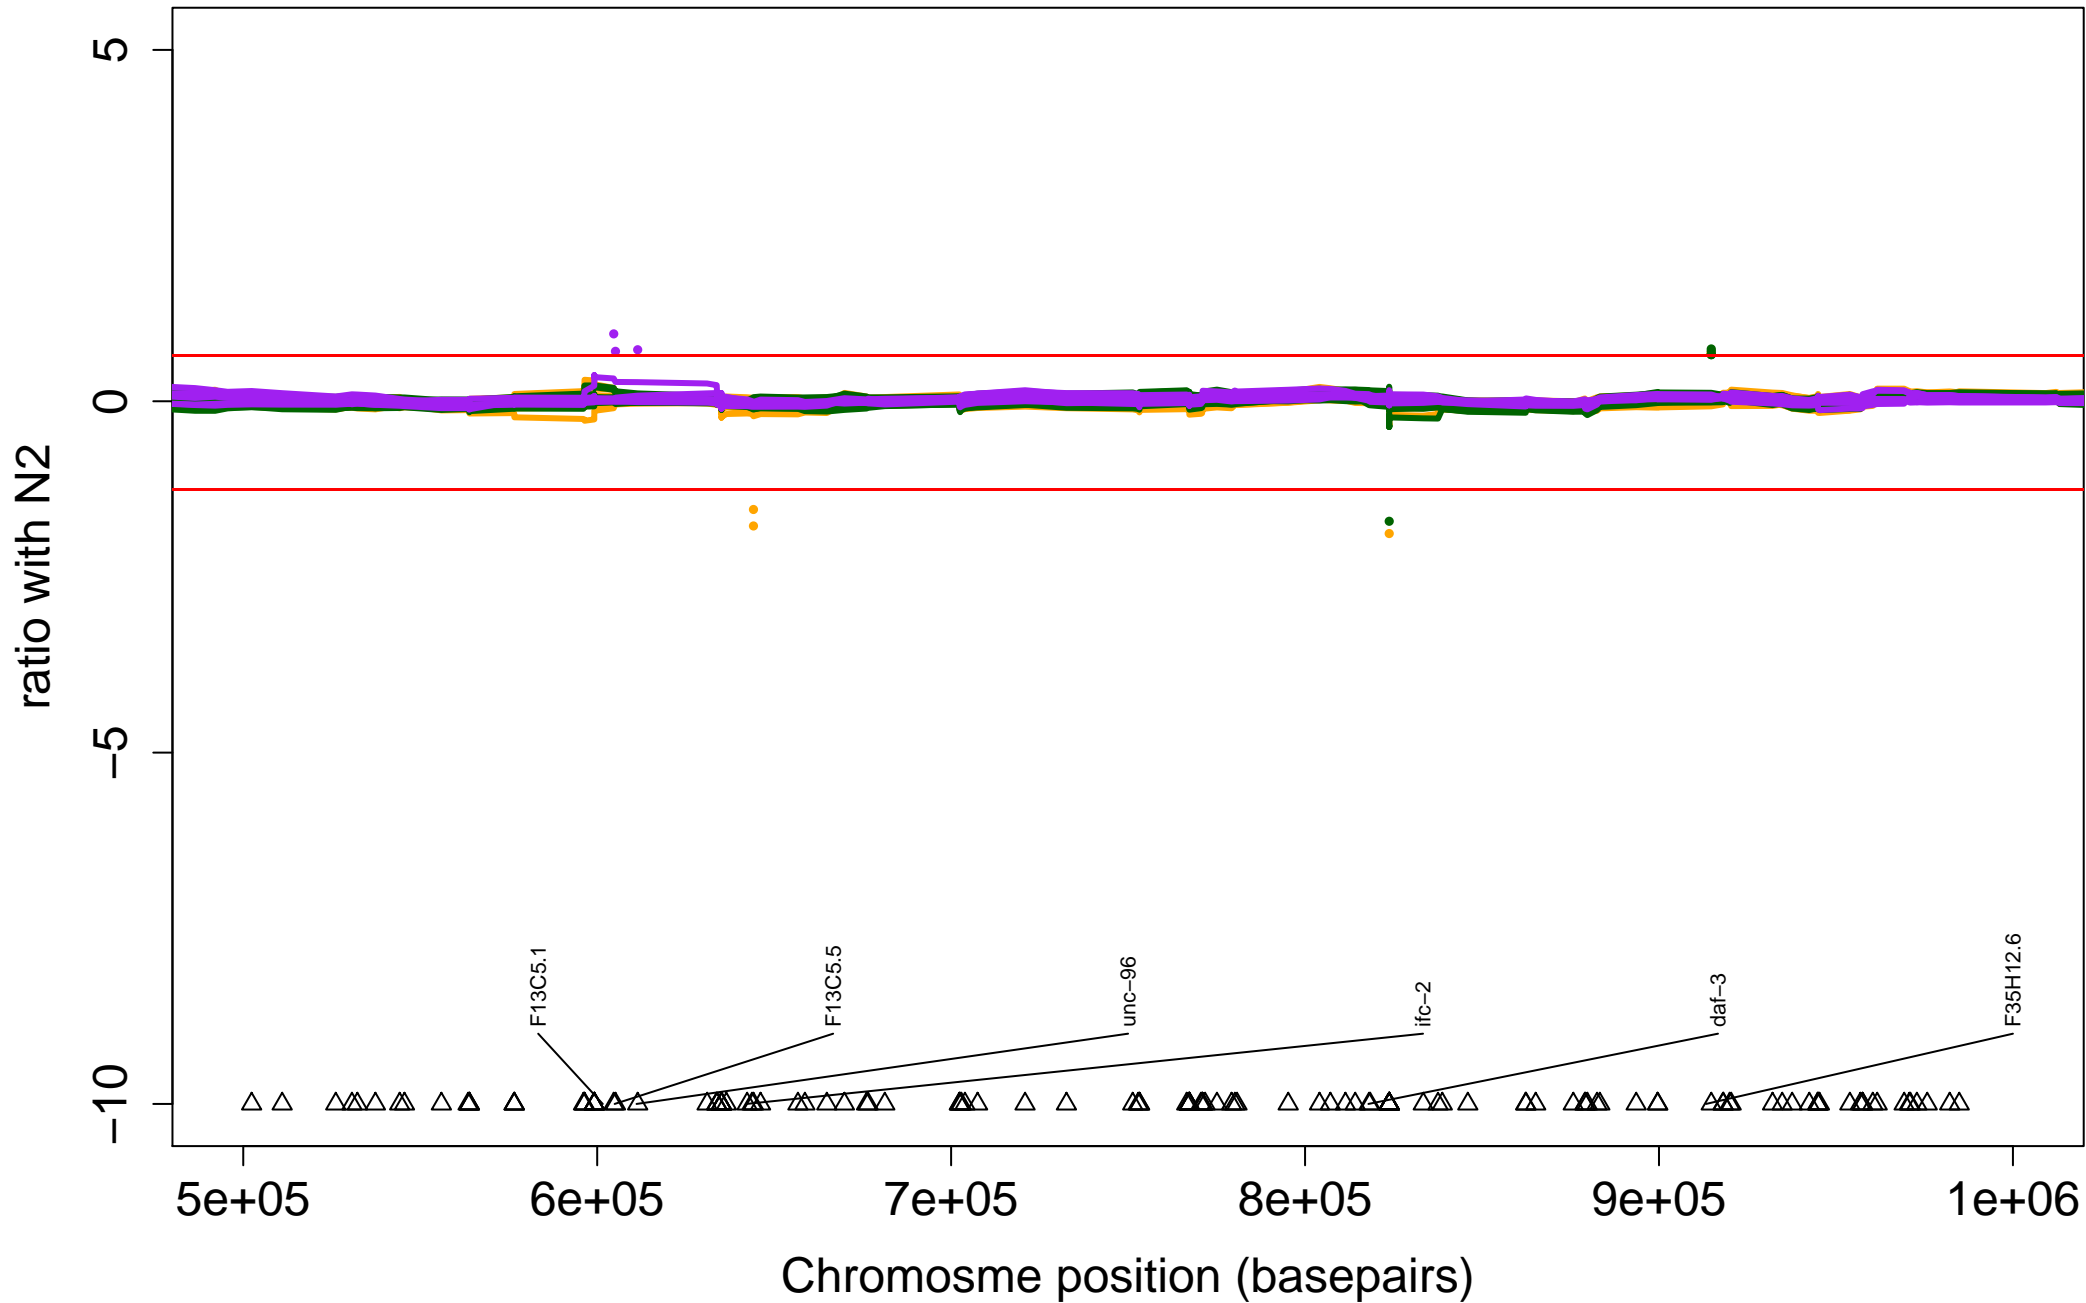

X

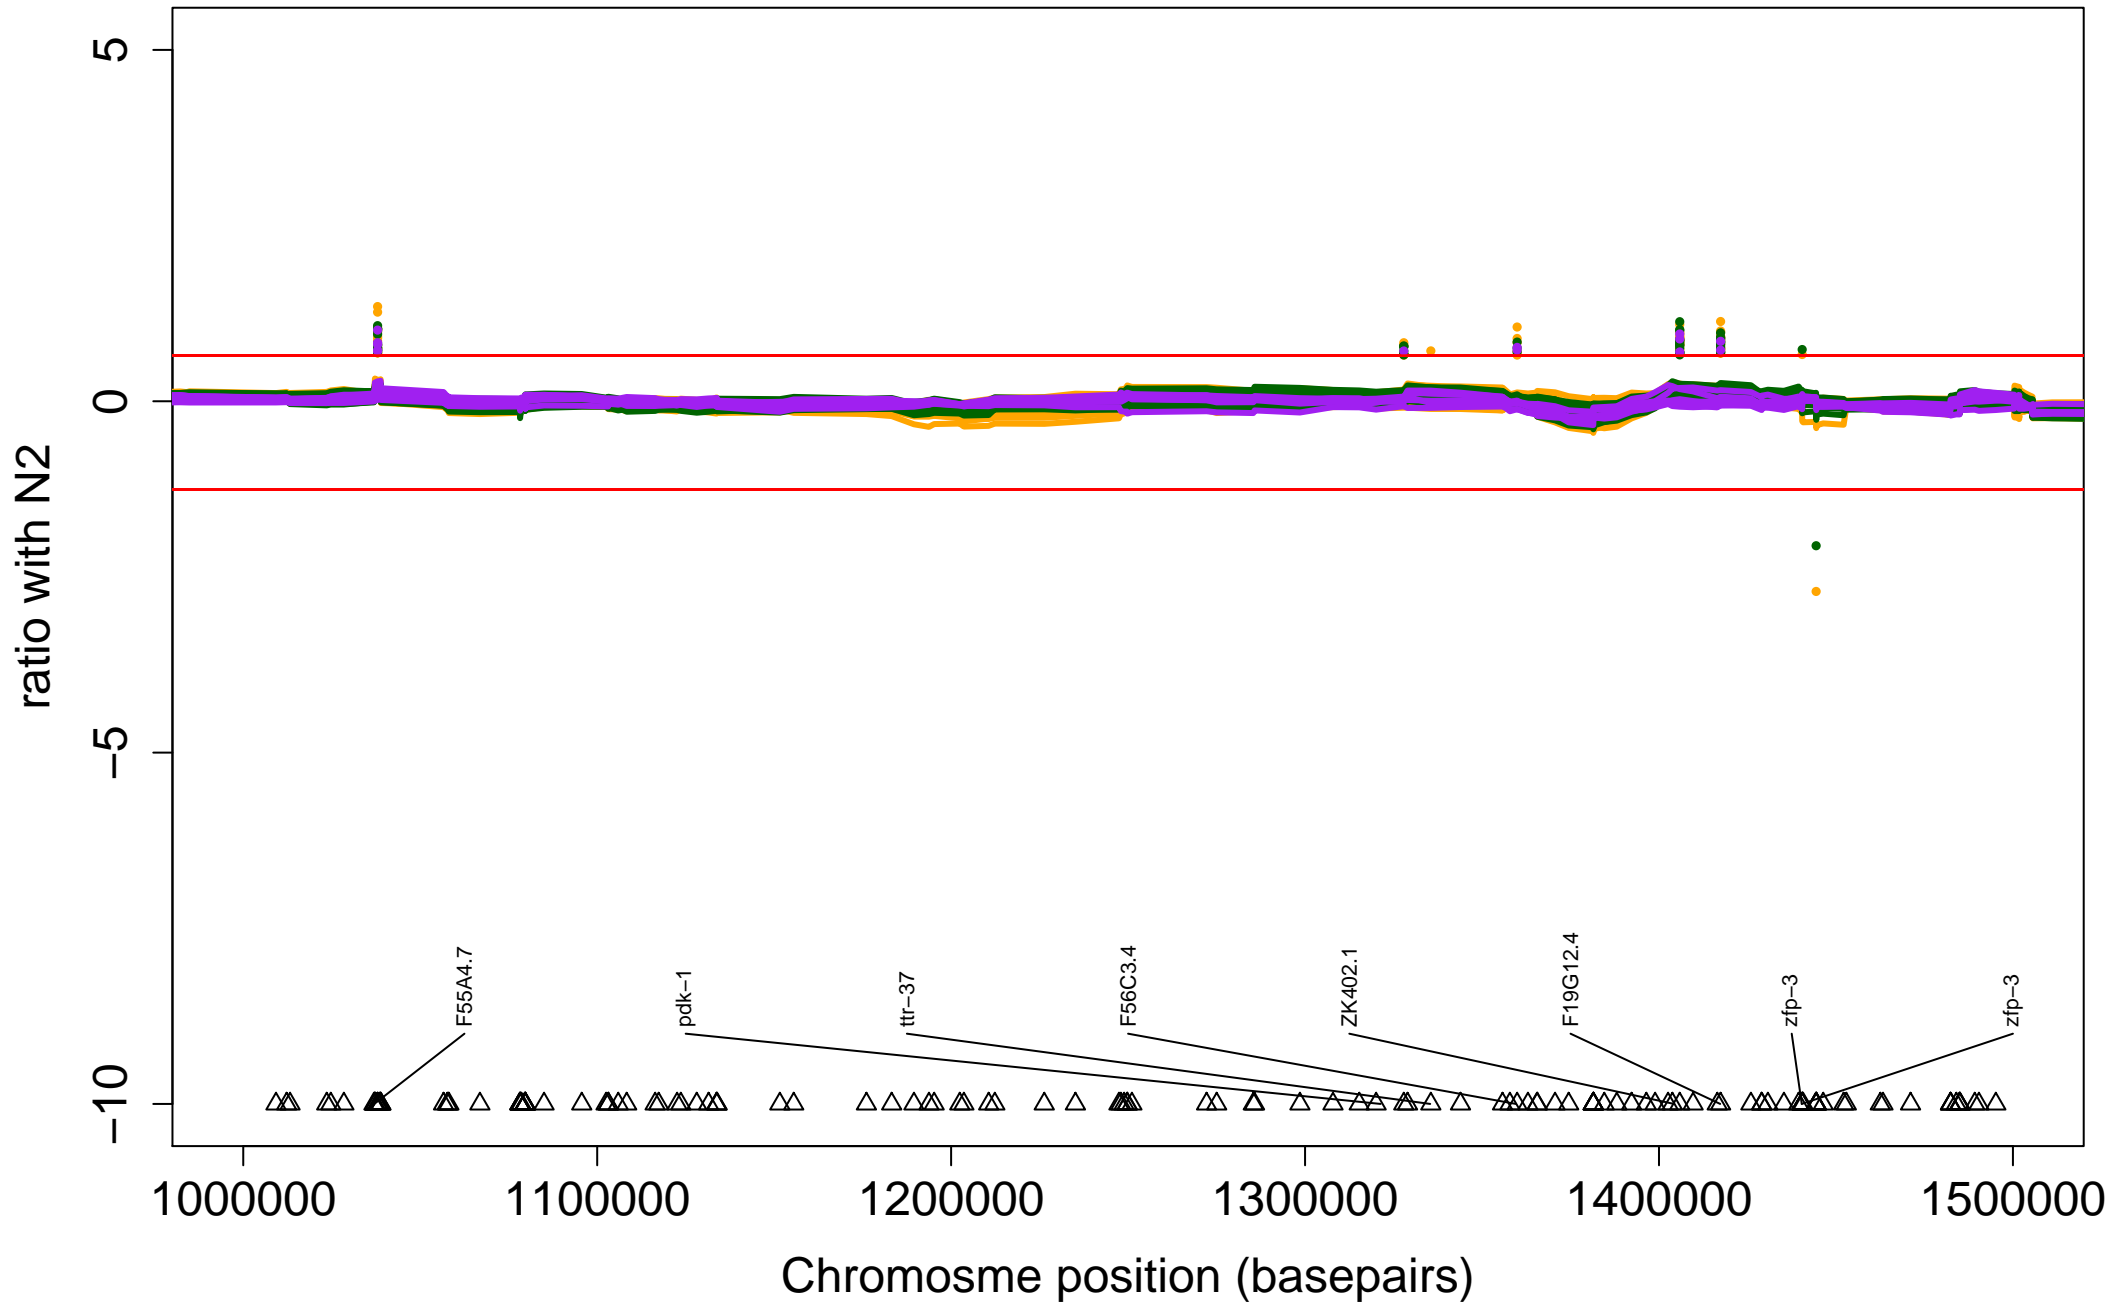

X

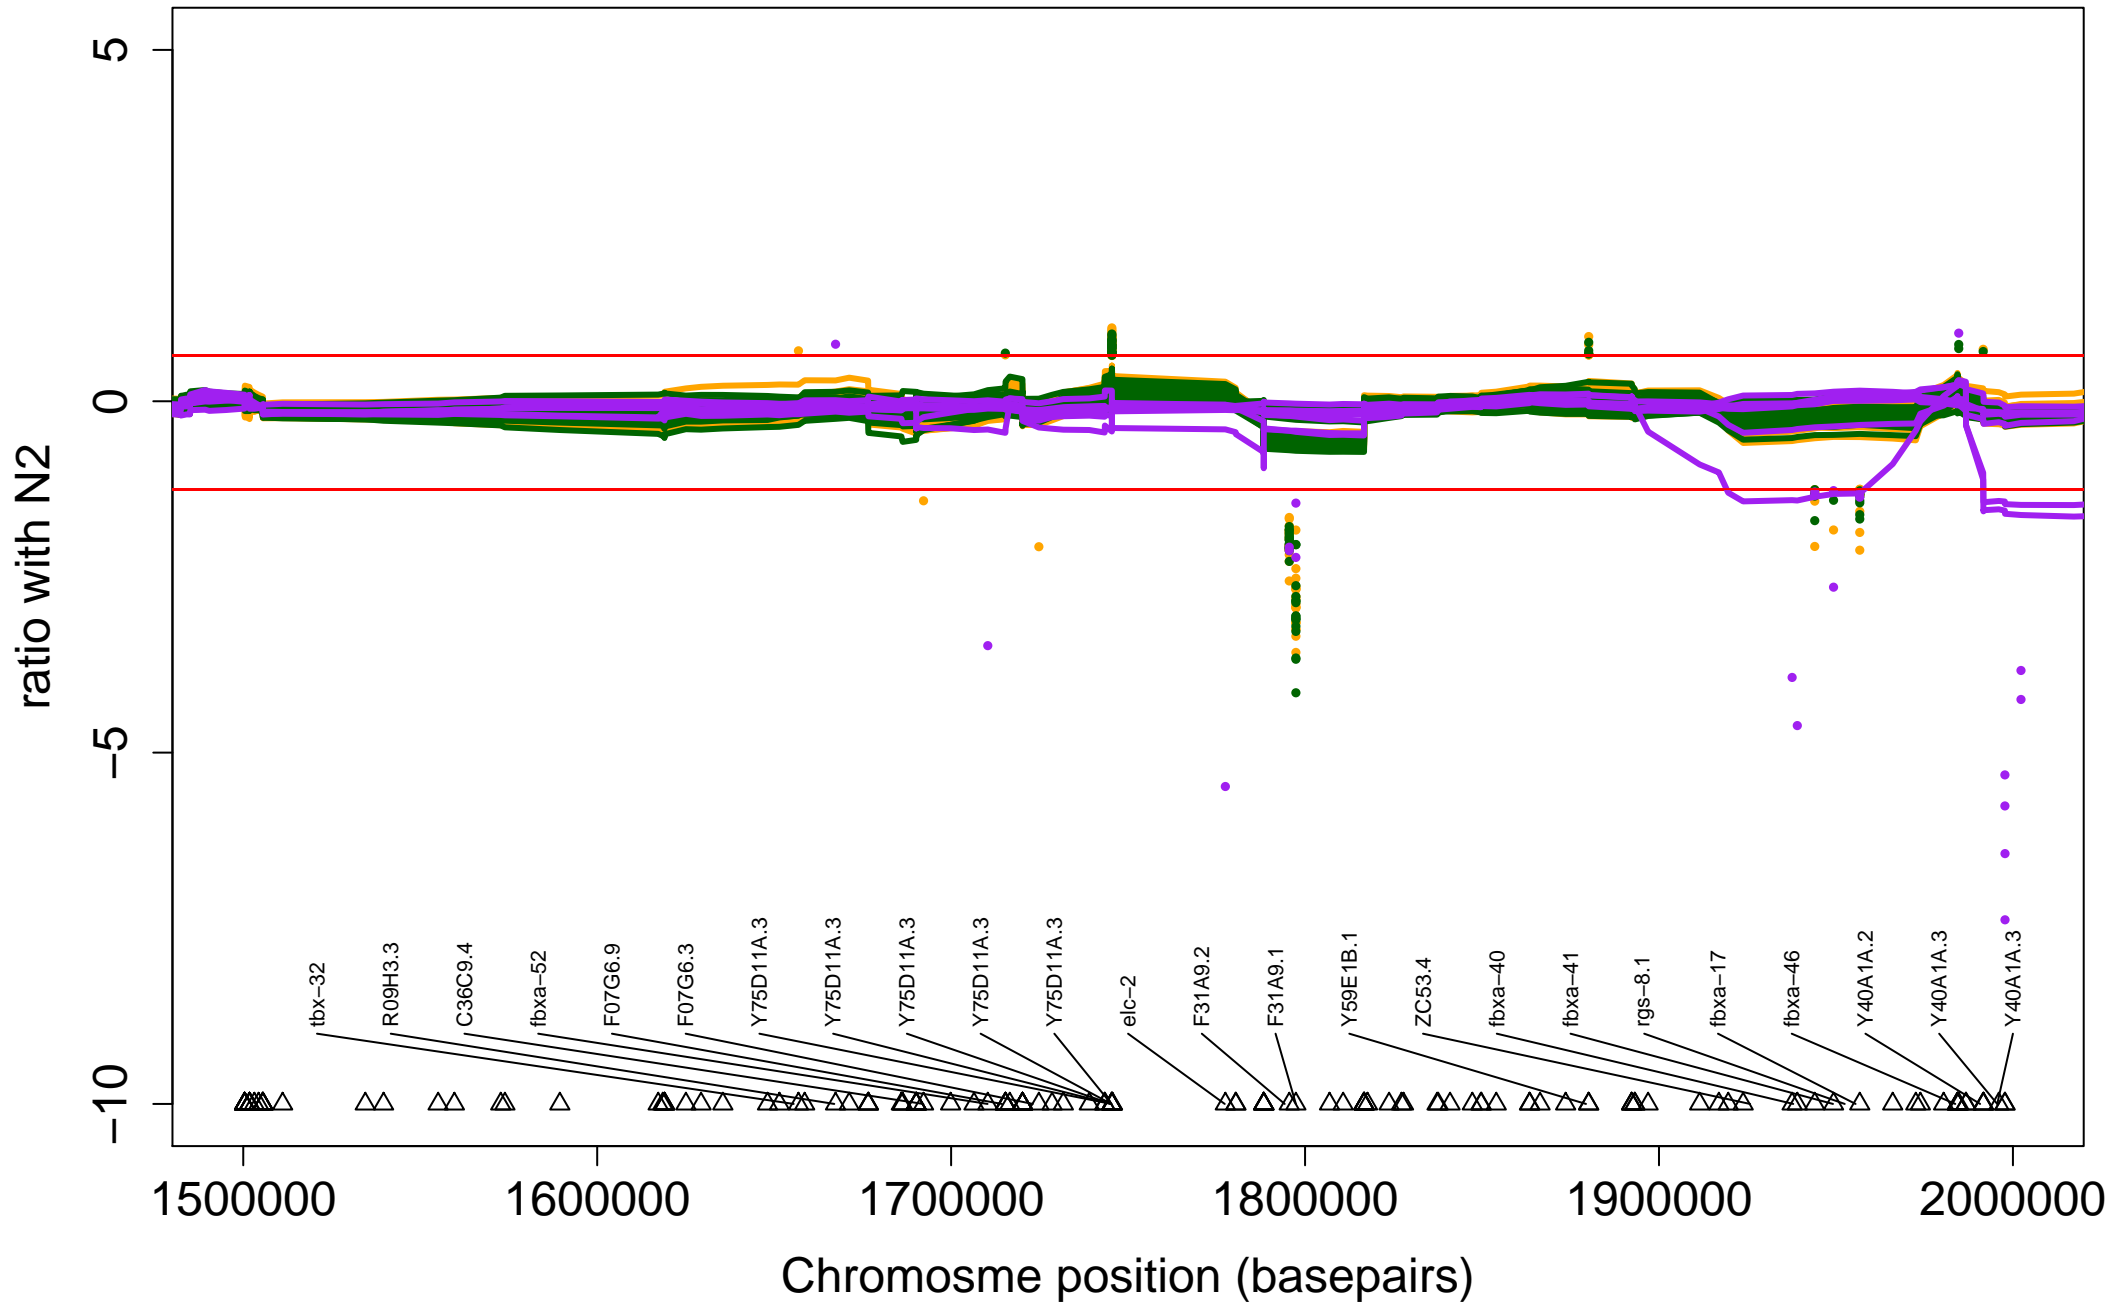

X

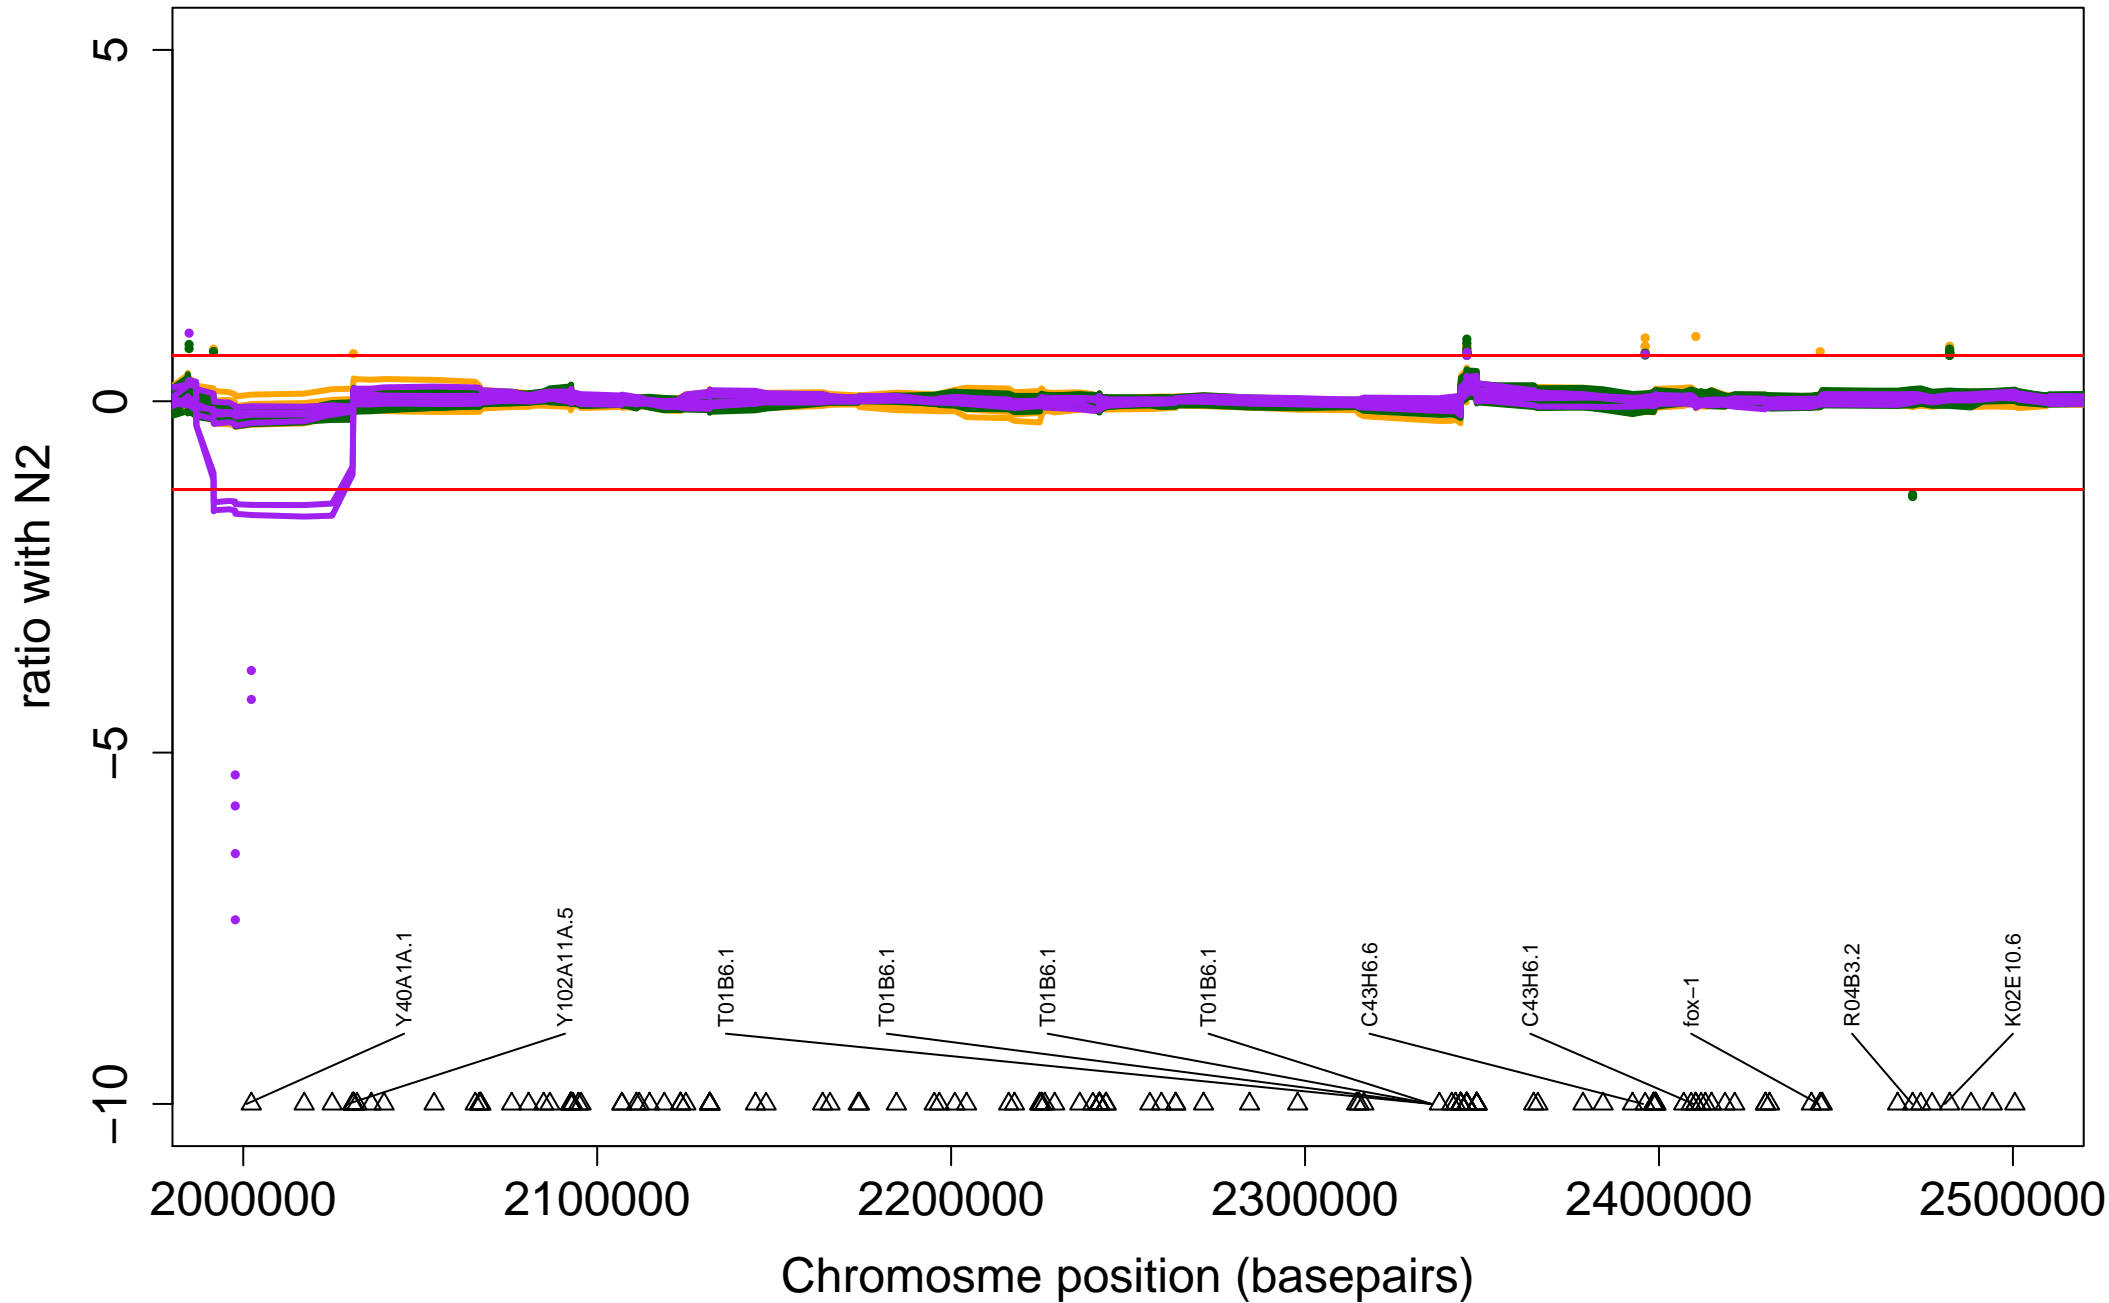



X

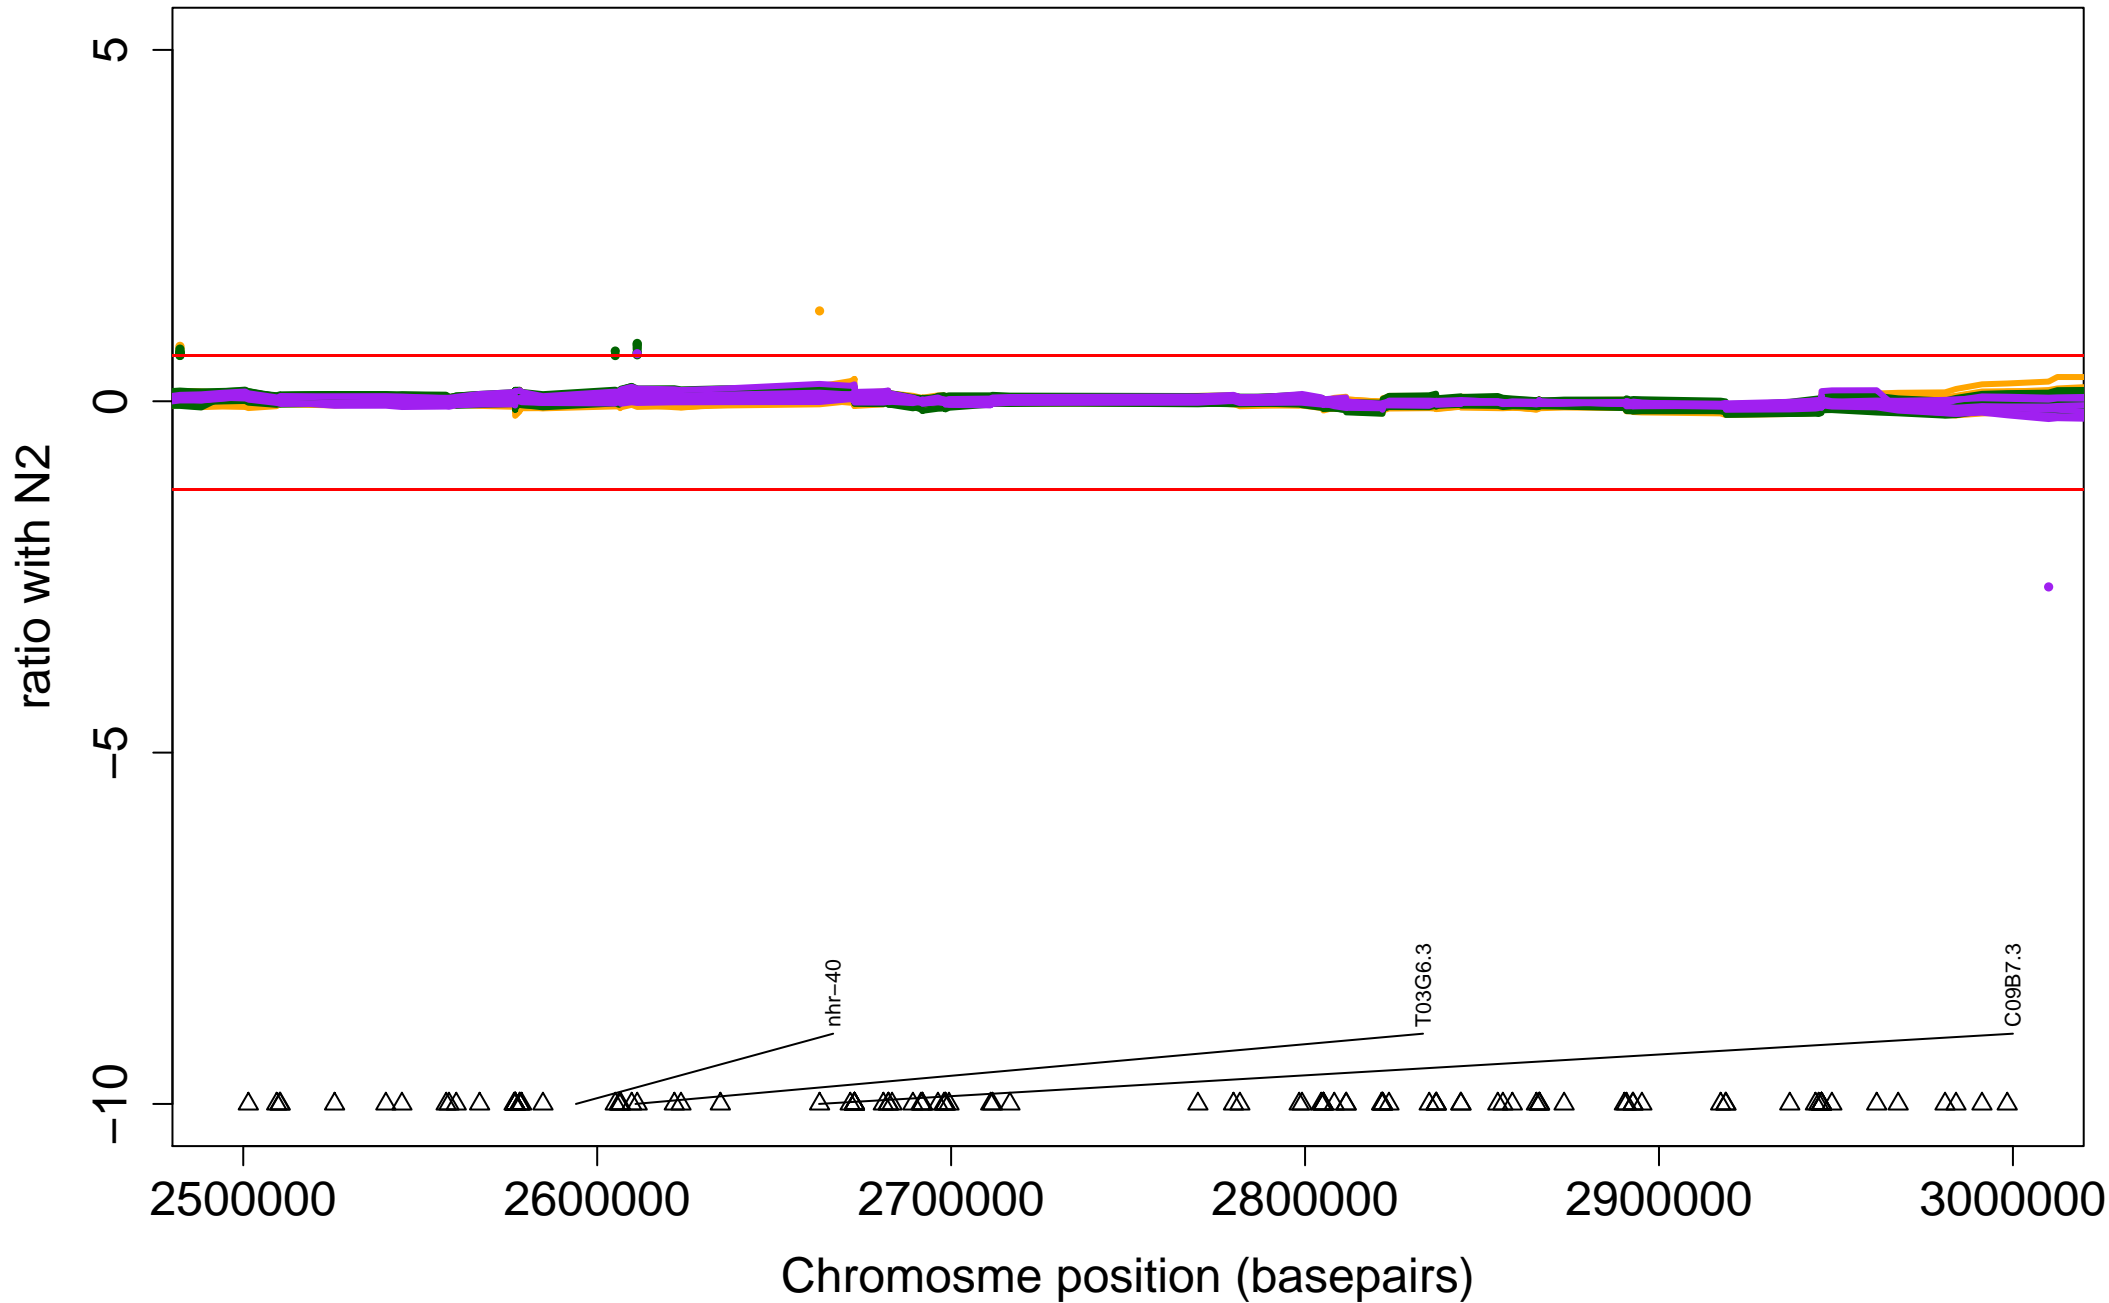

X

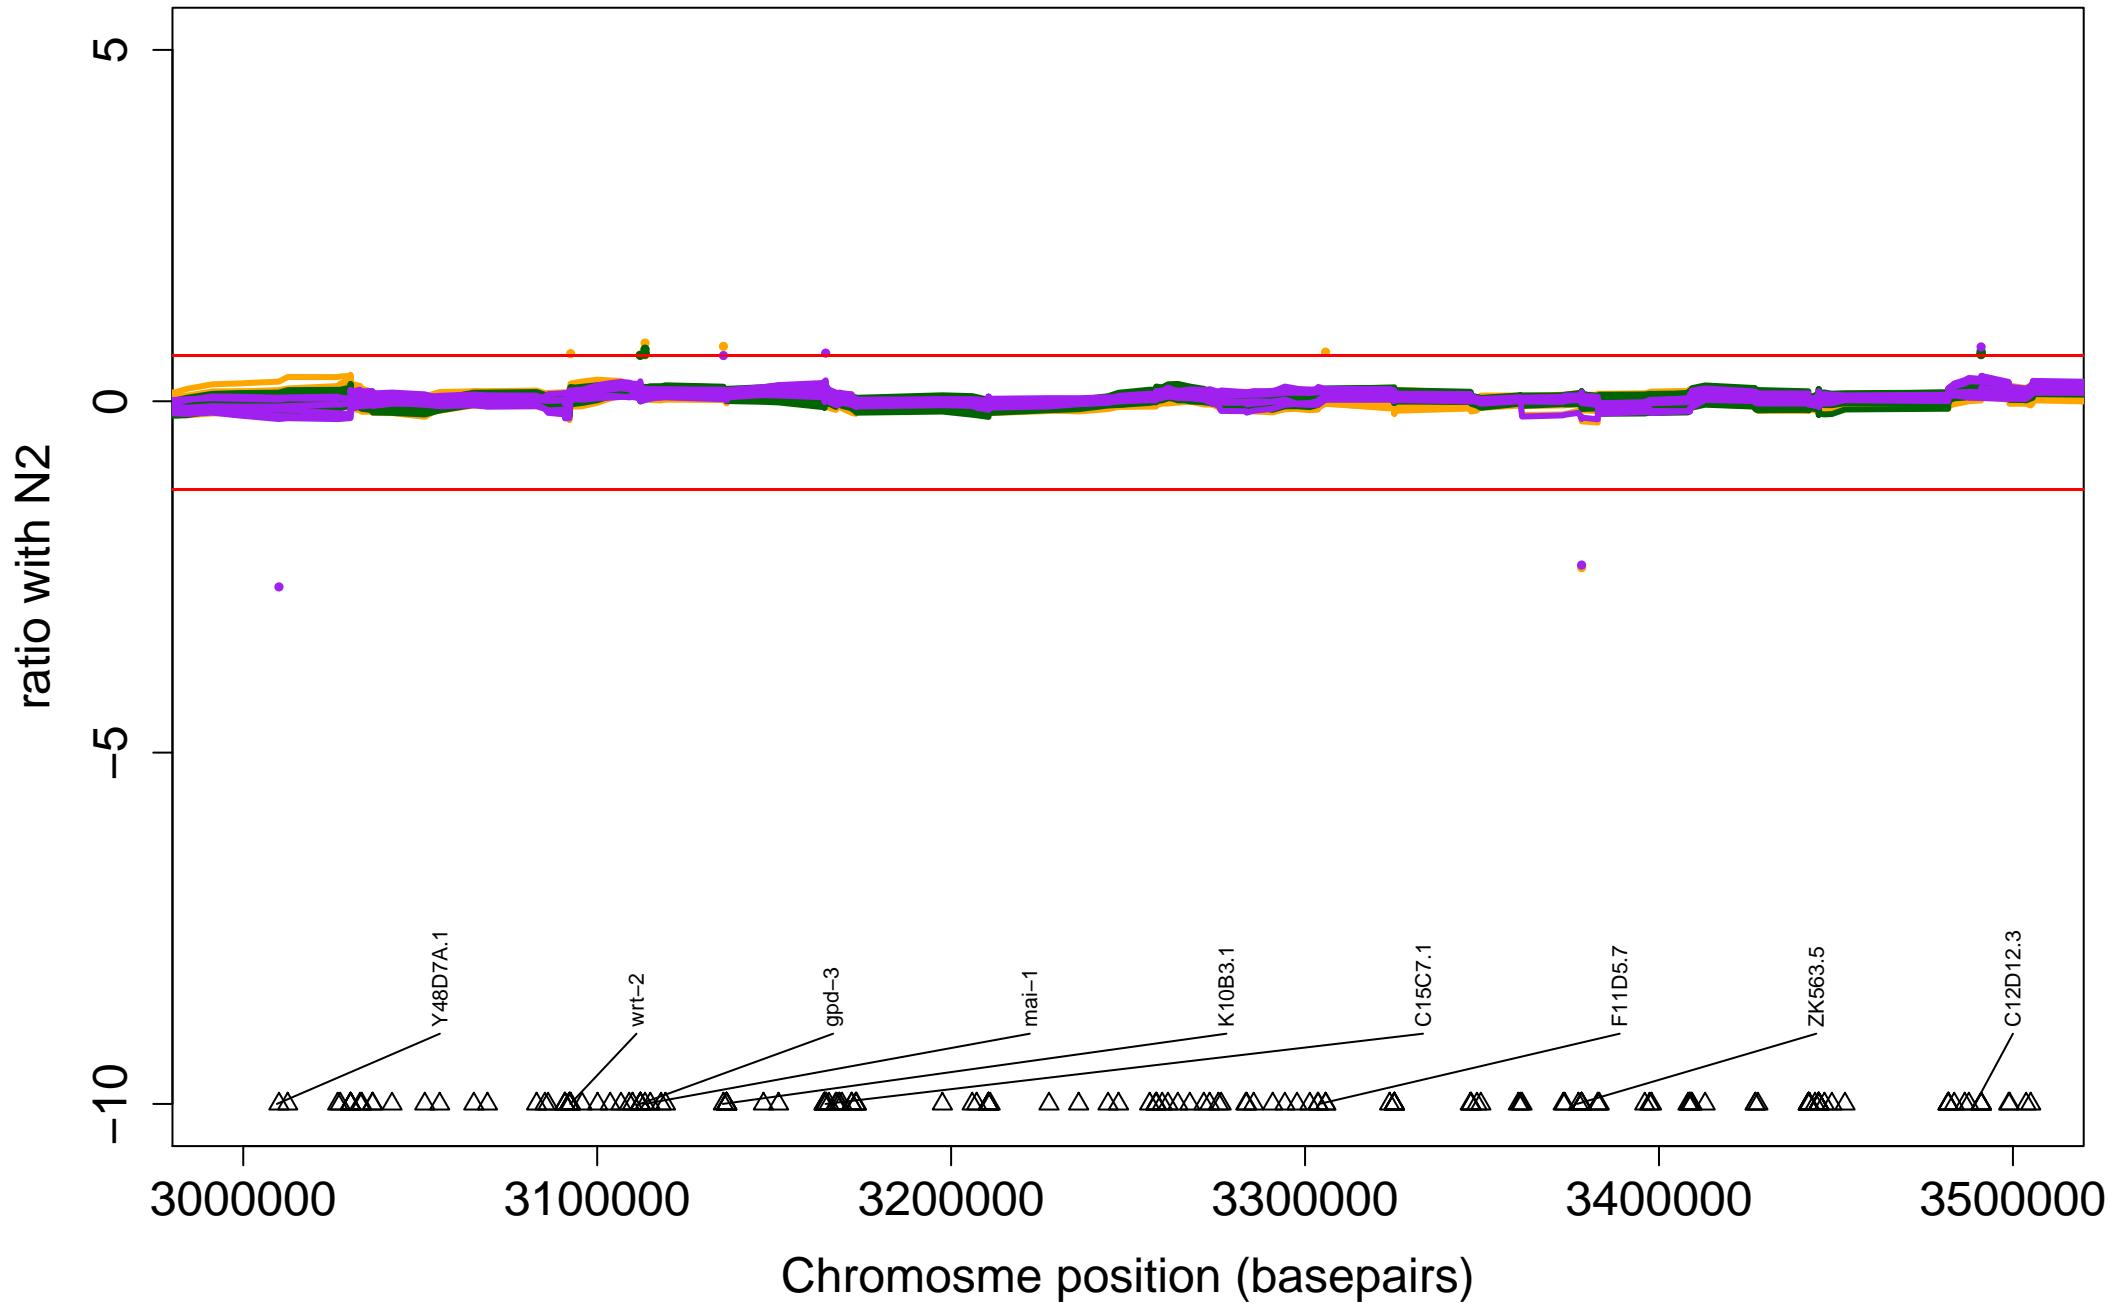

X

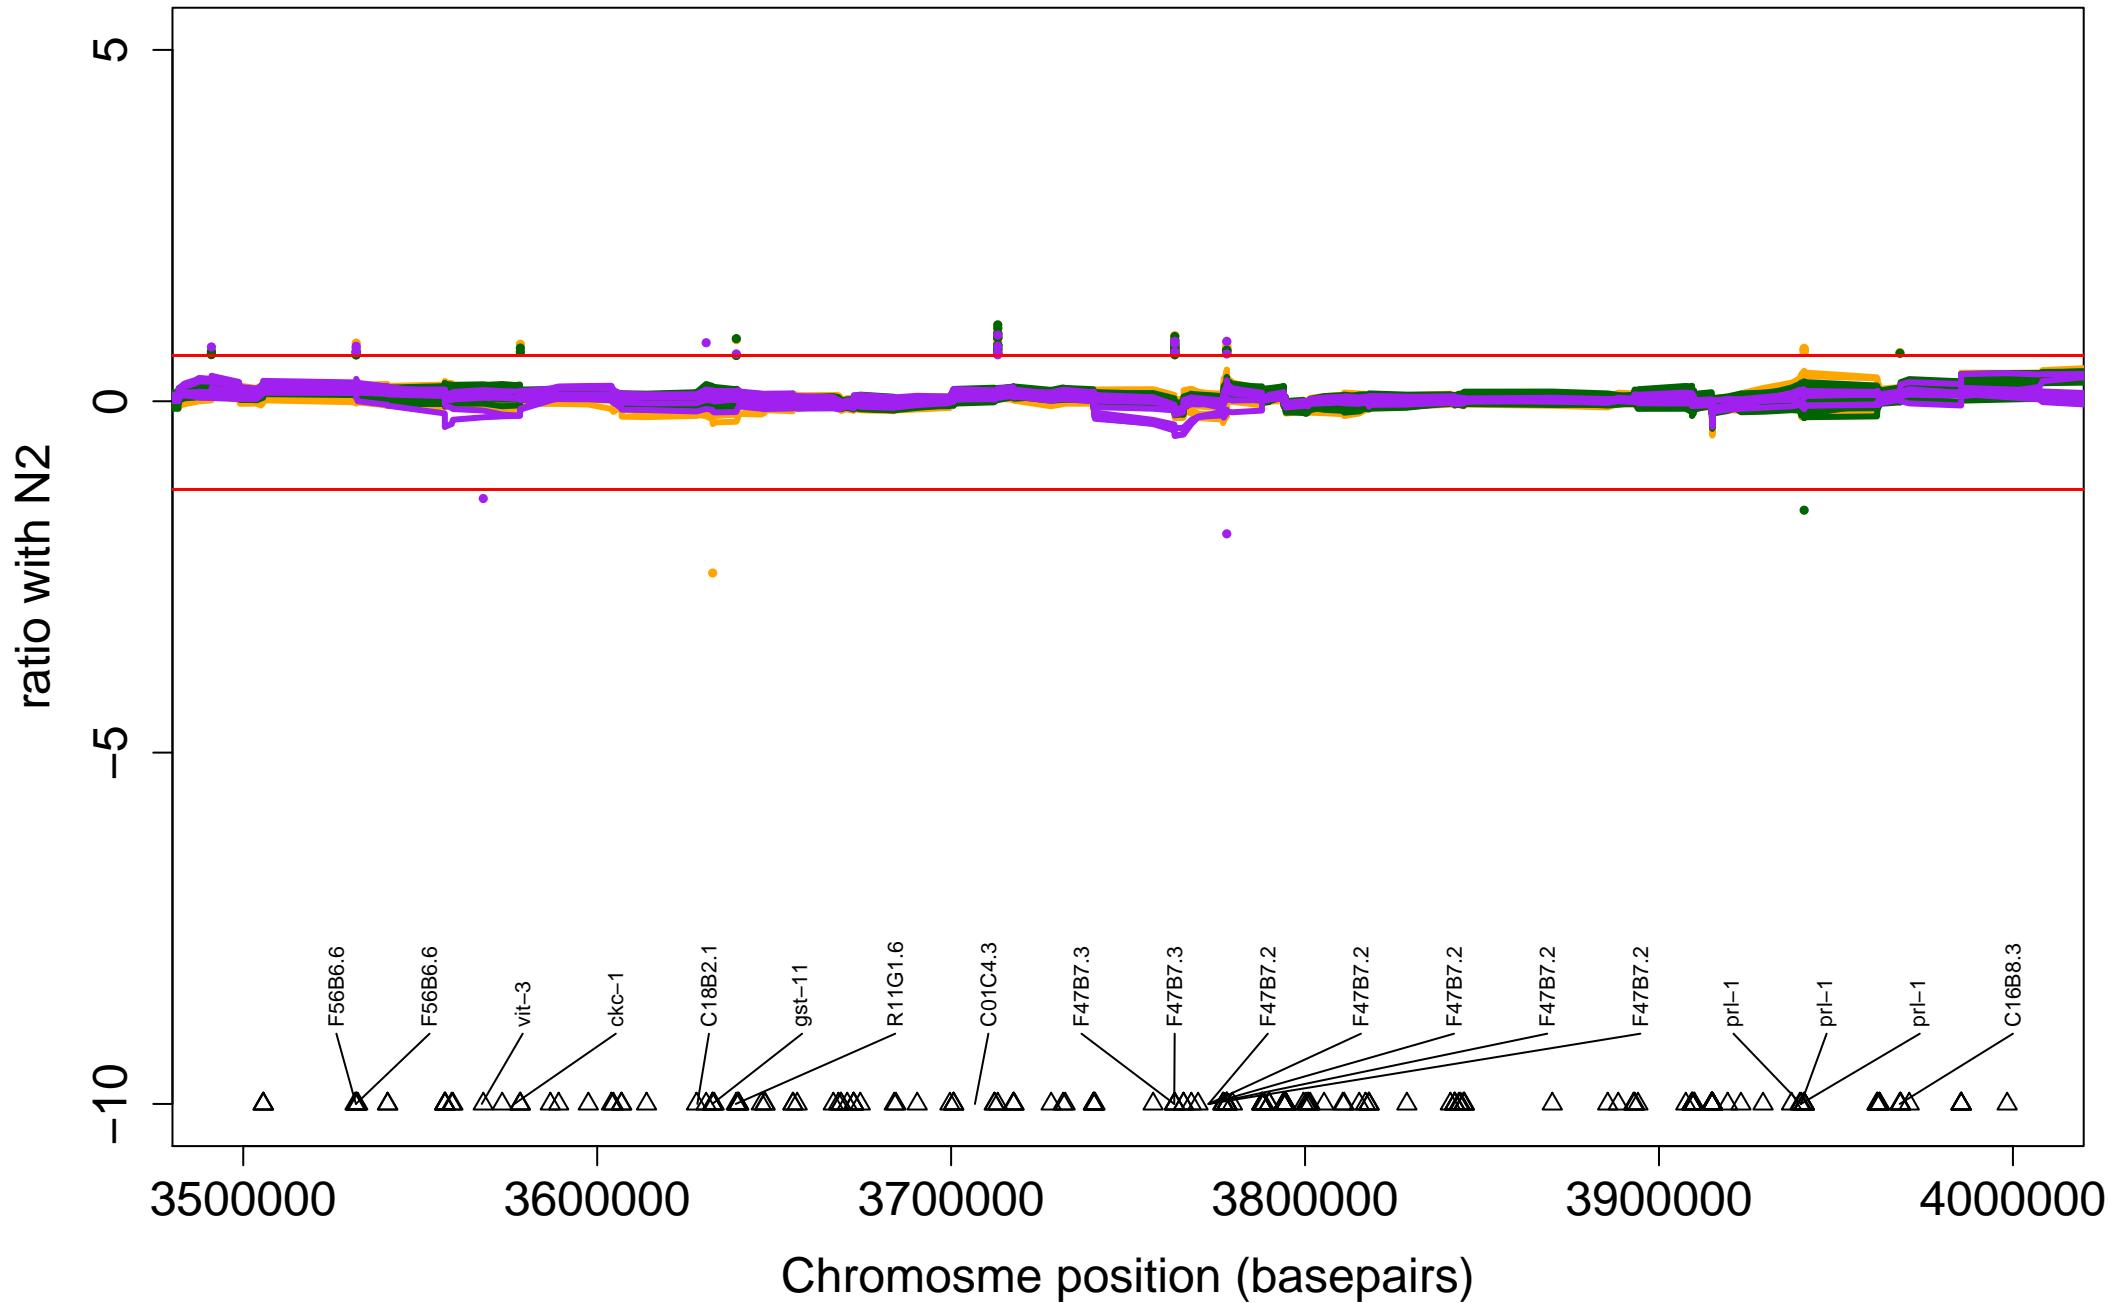

X

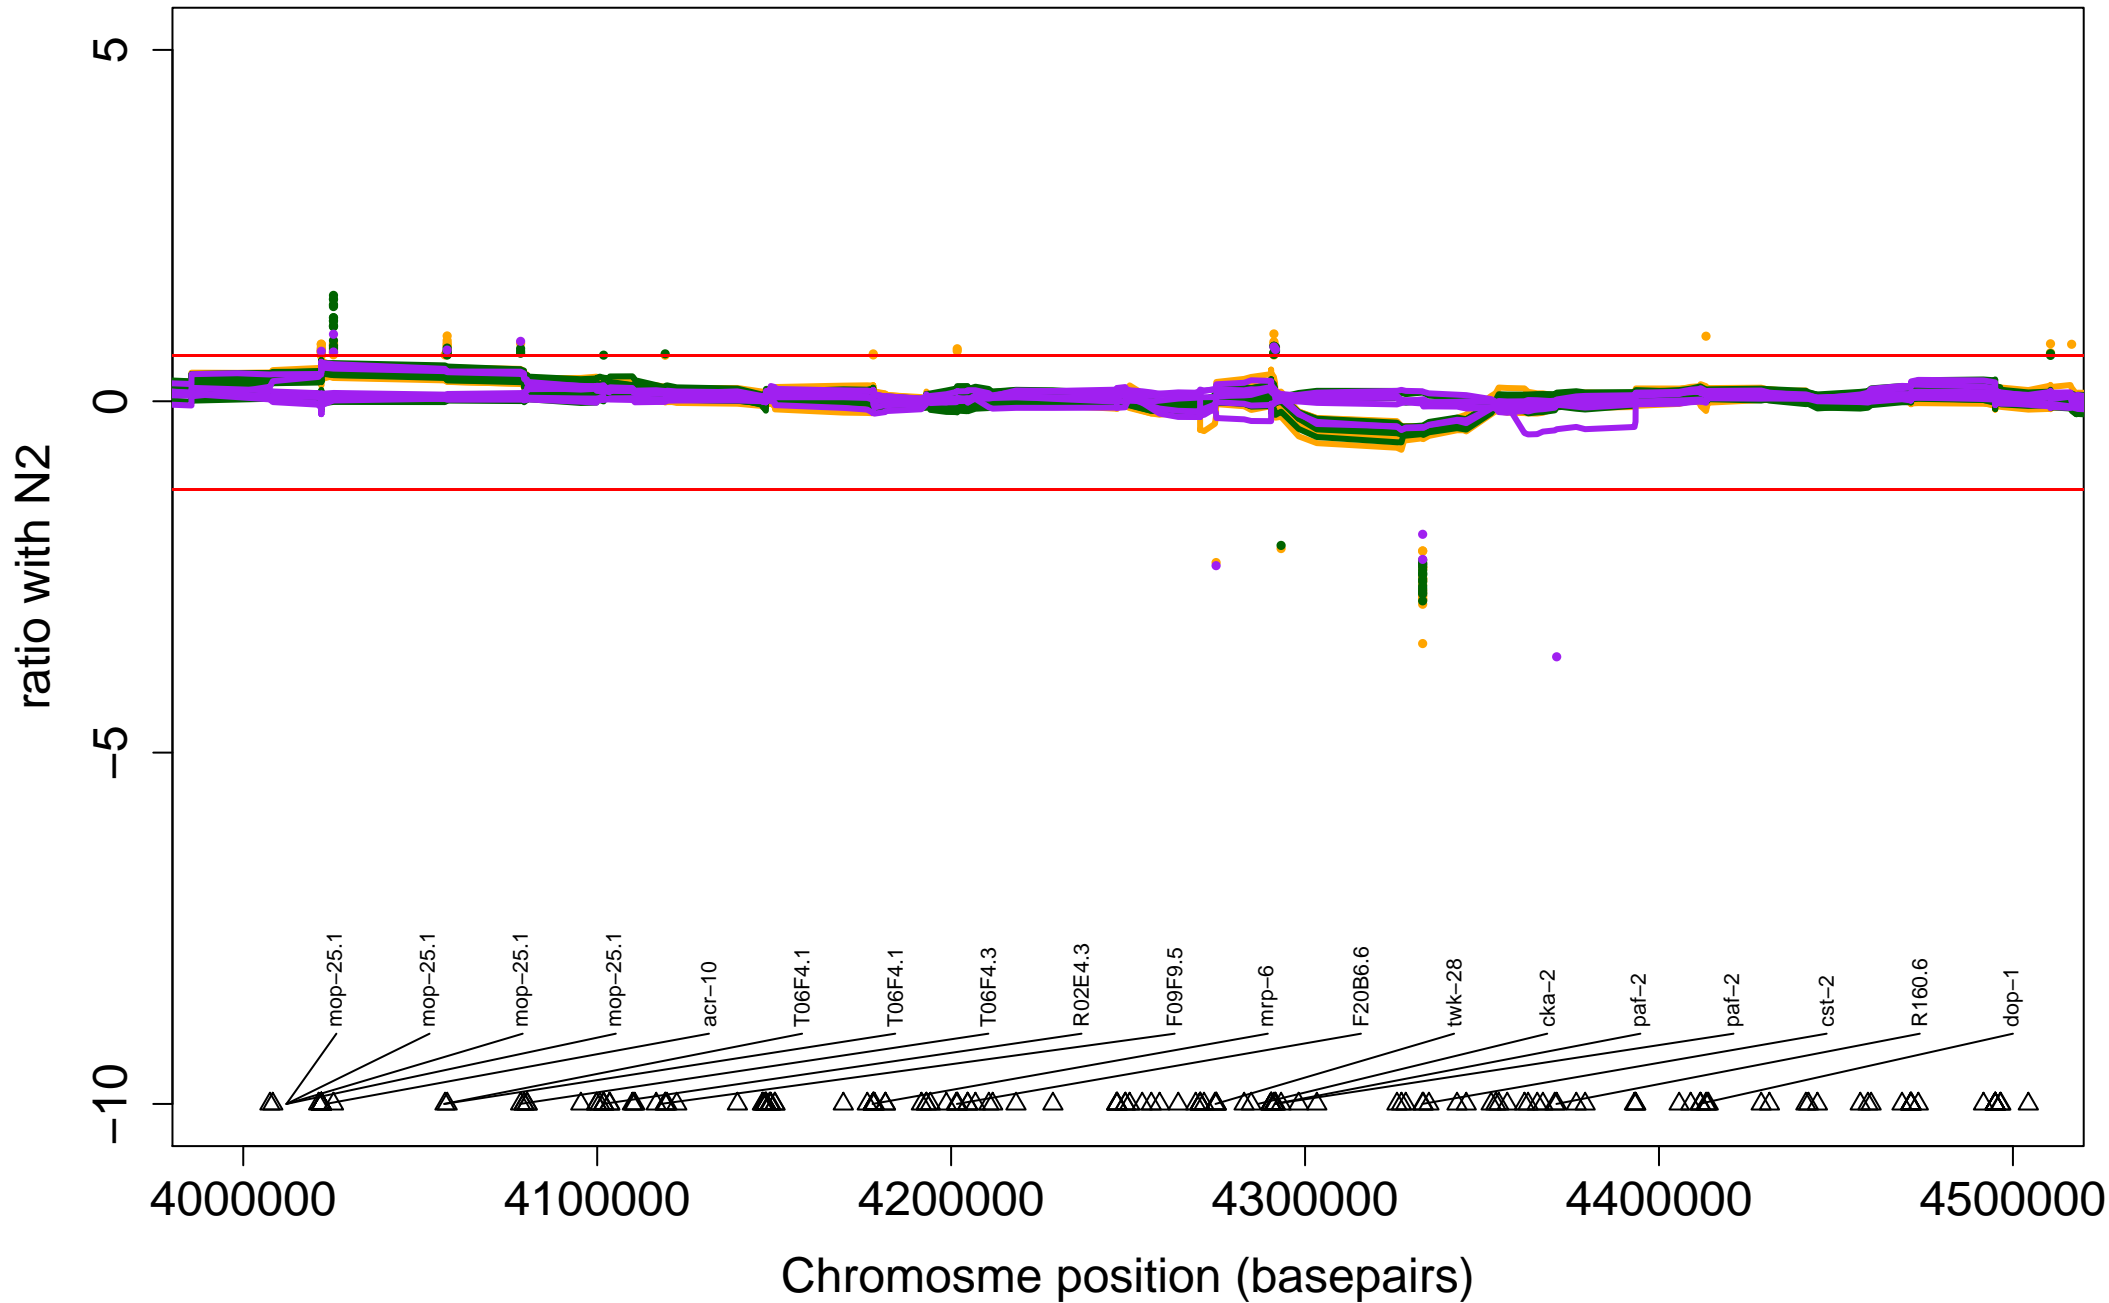

X

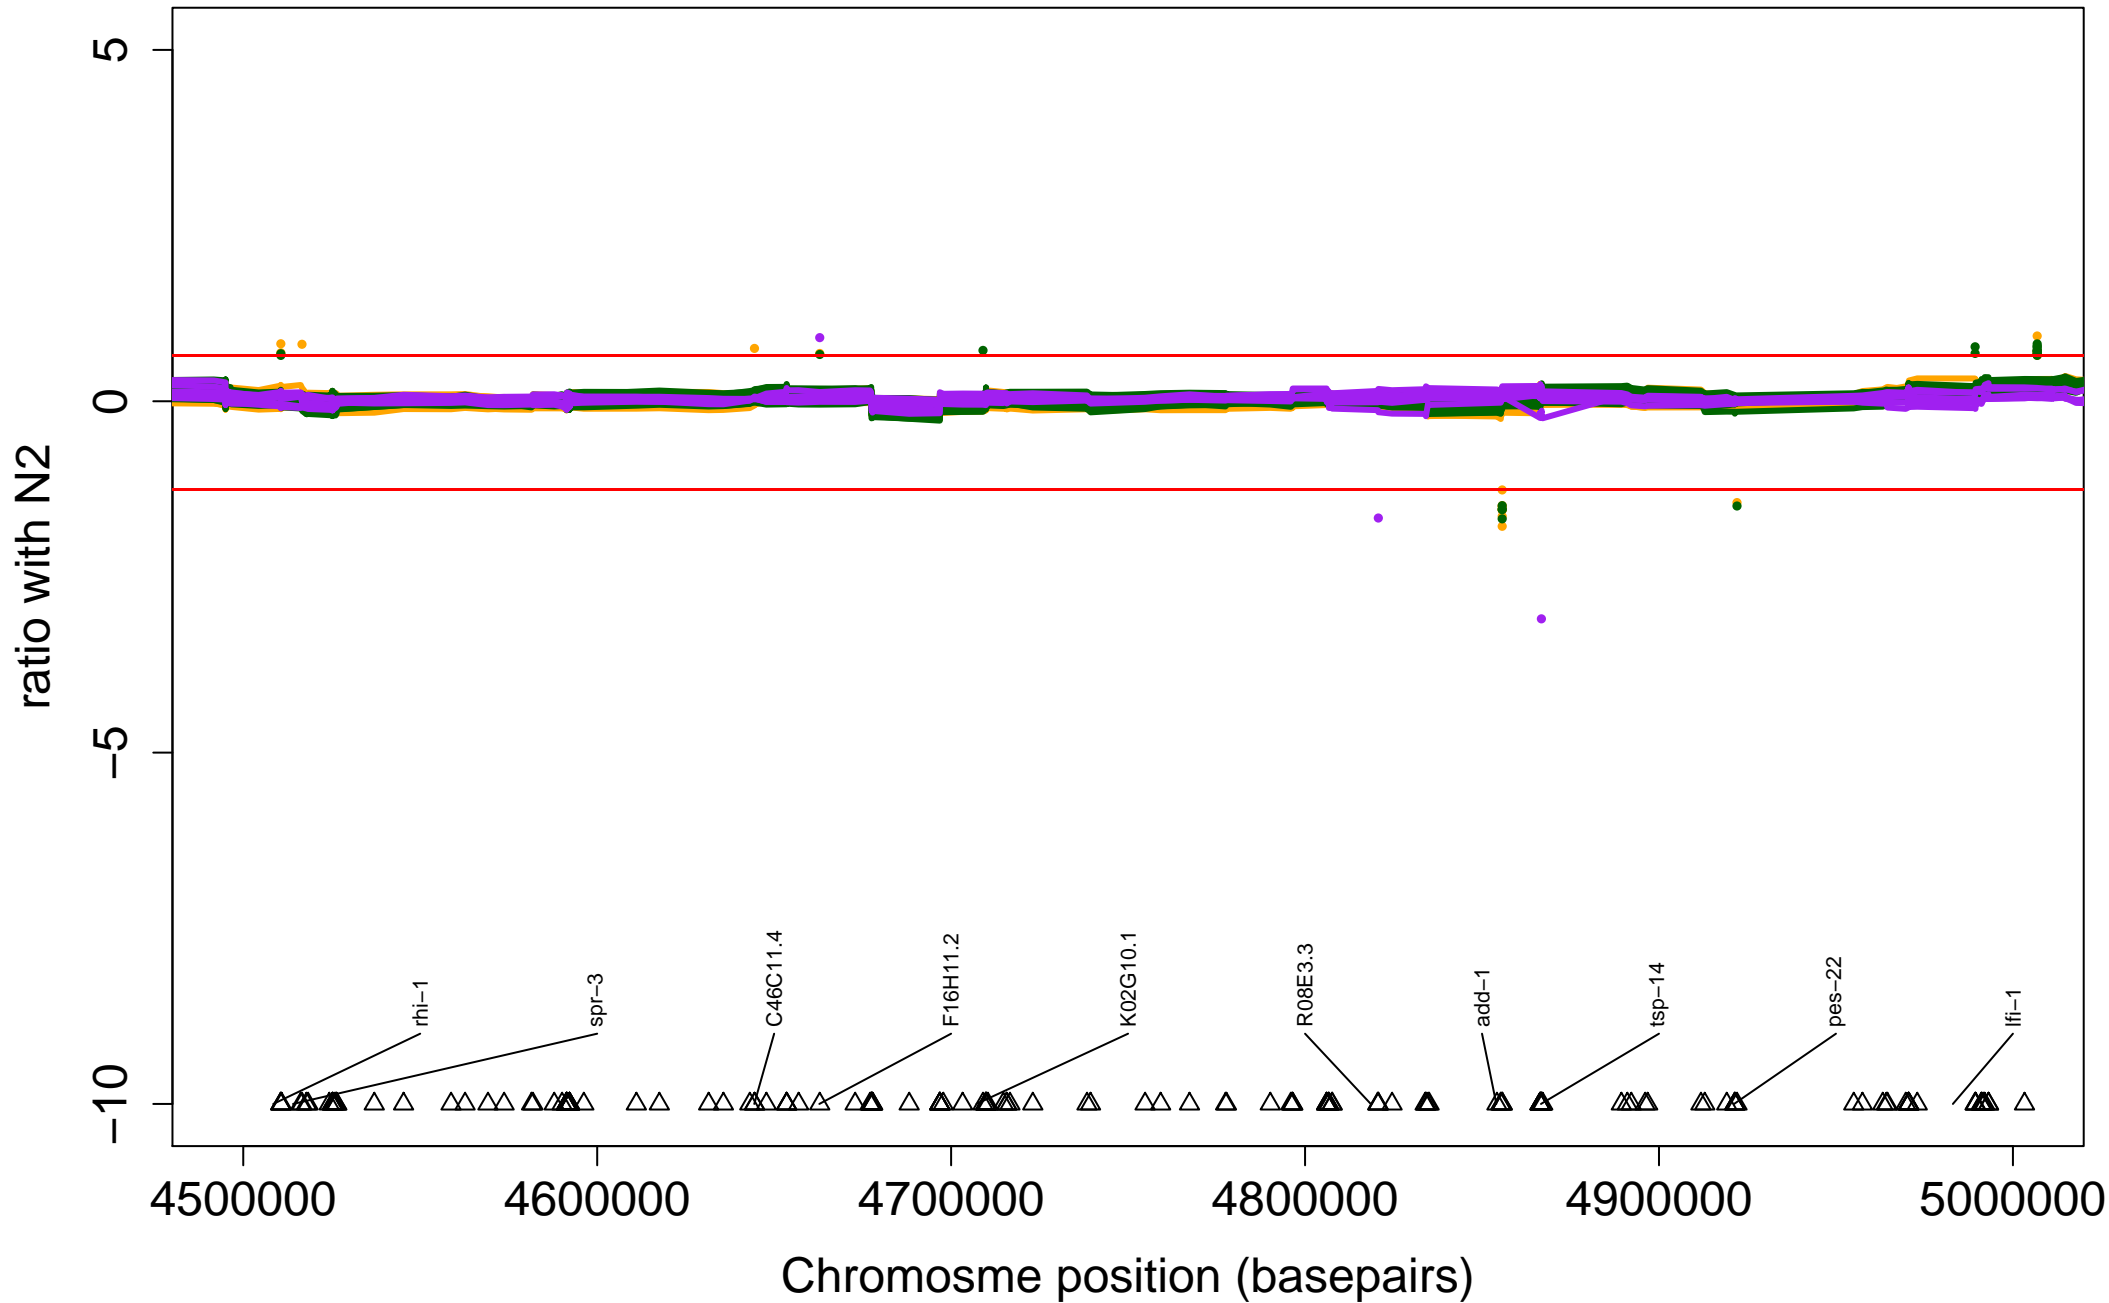

X

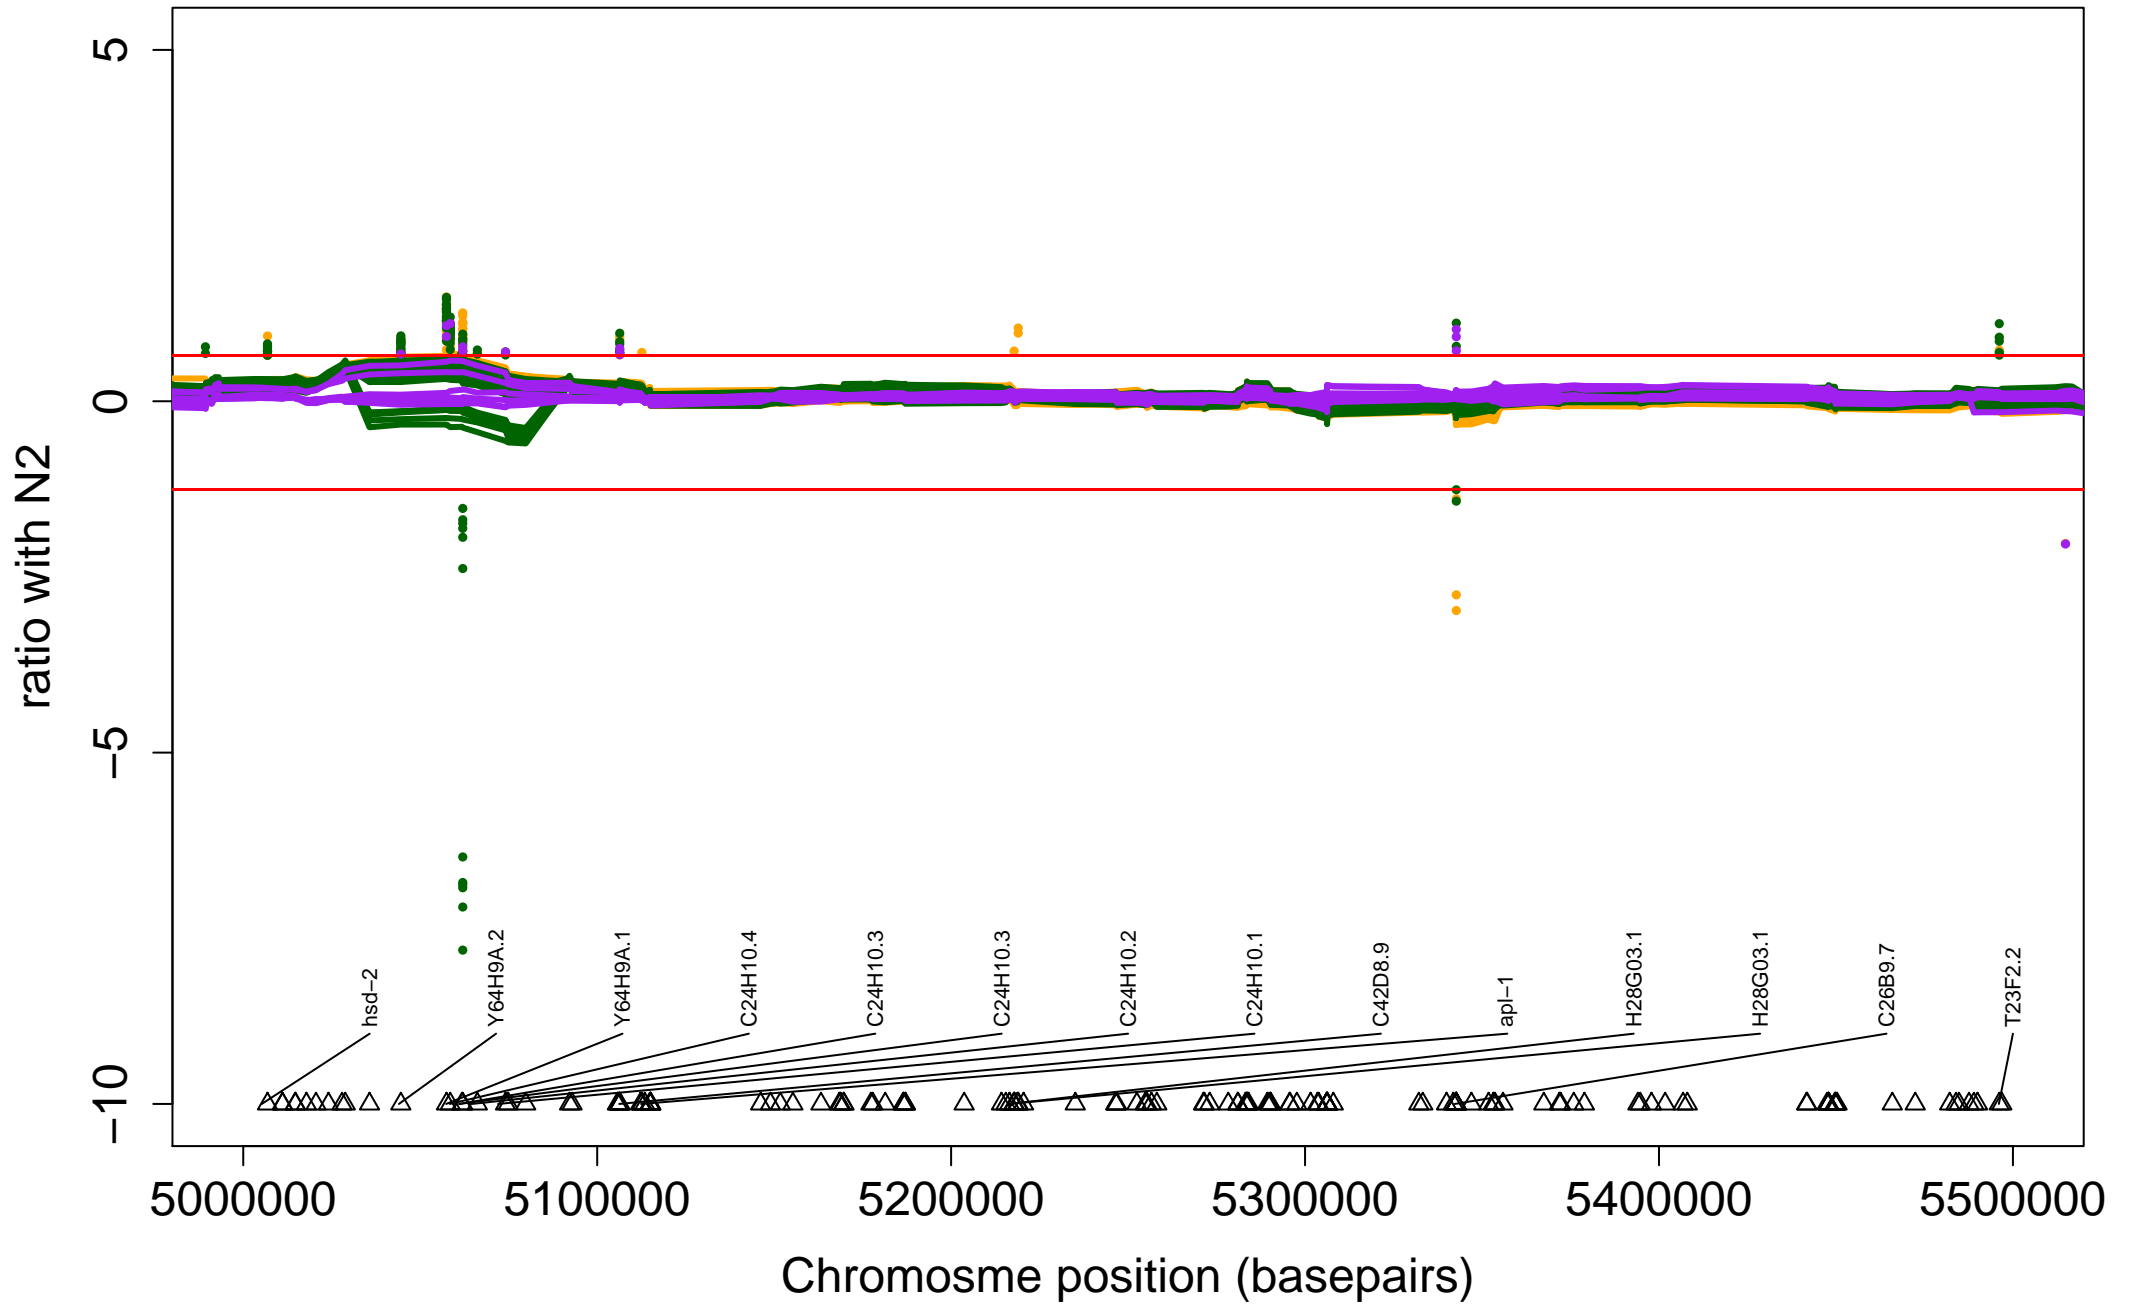

X

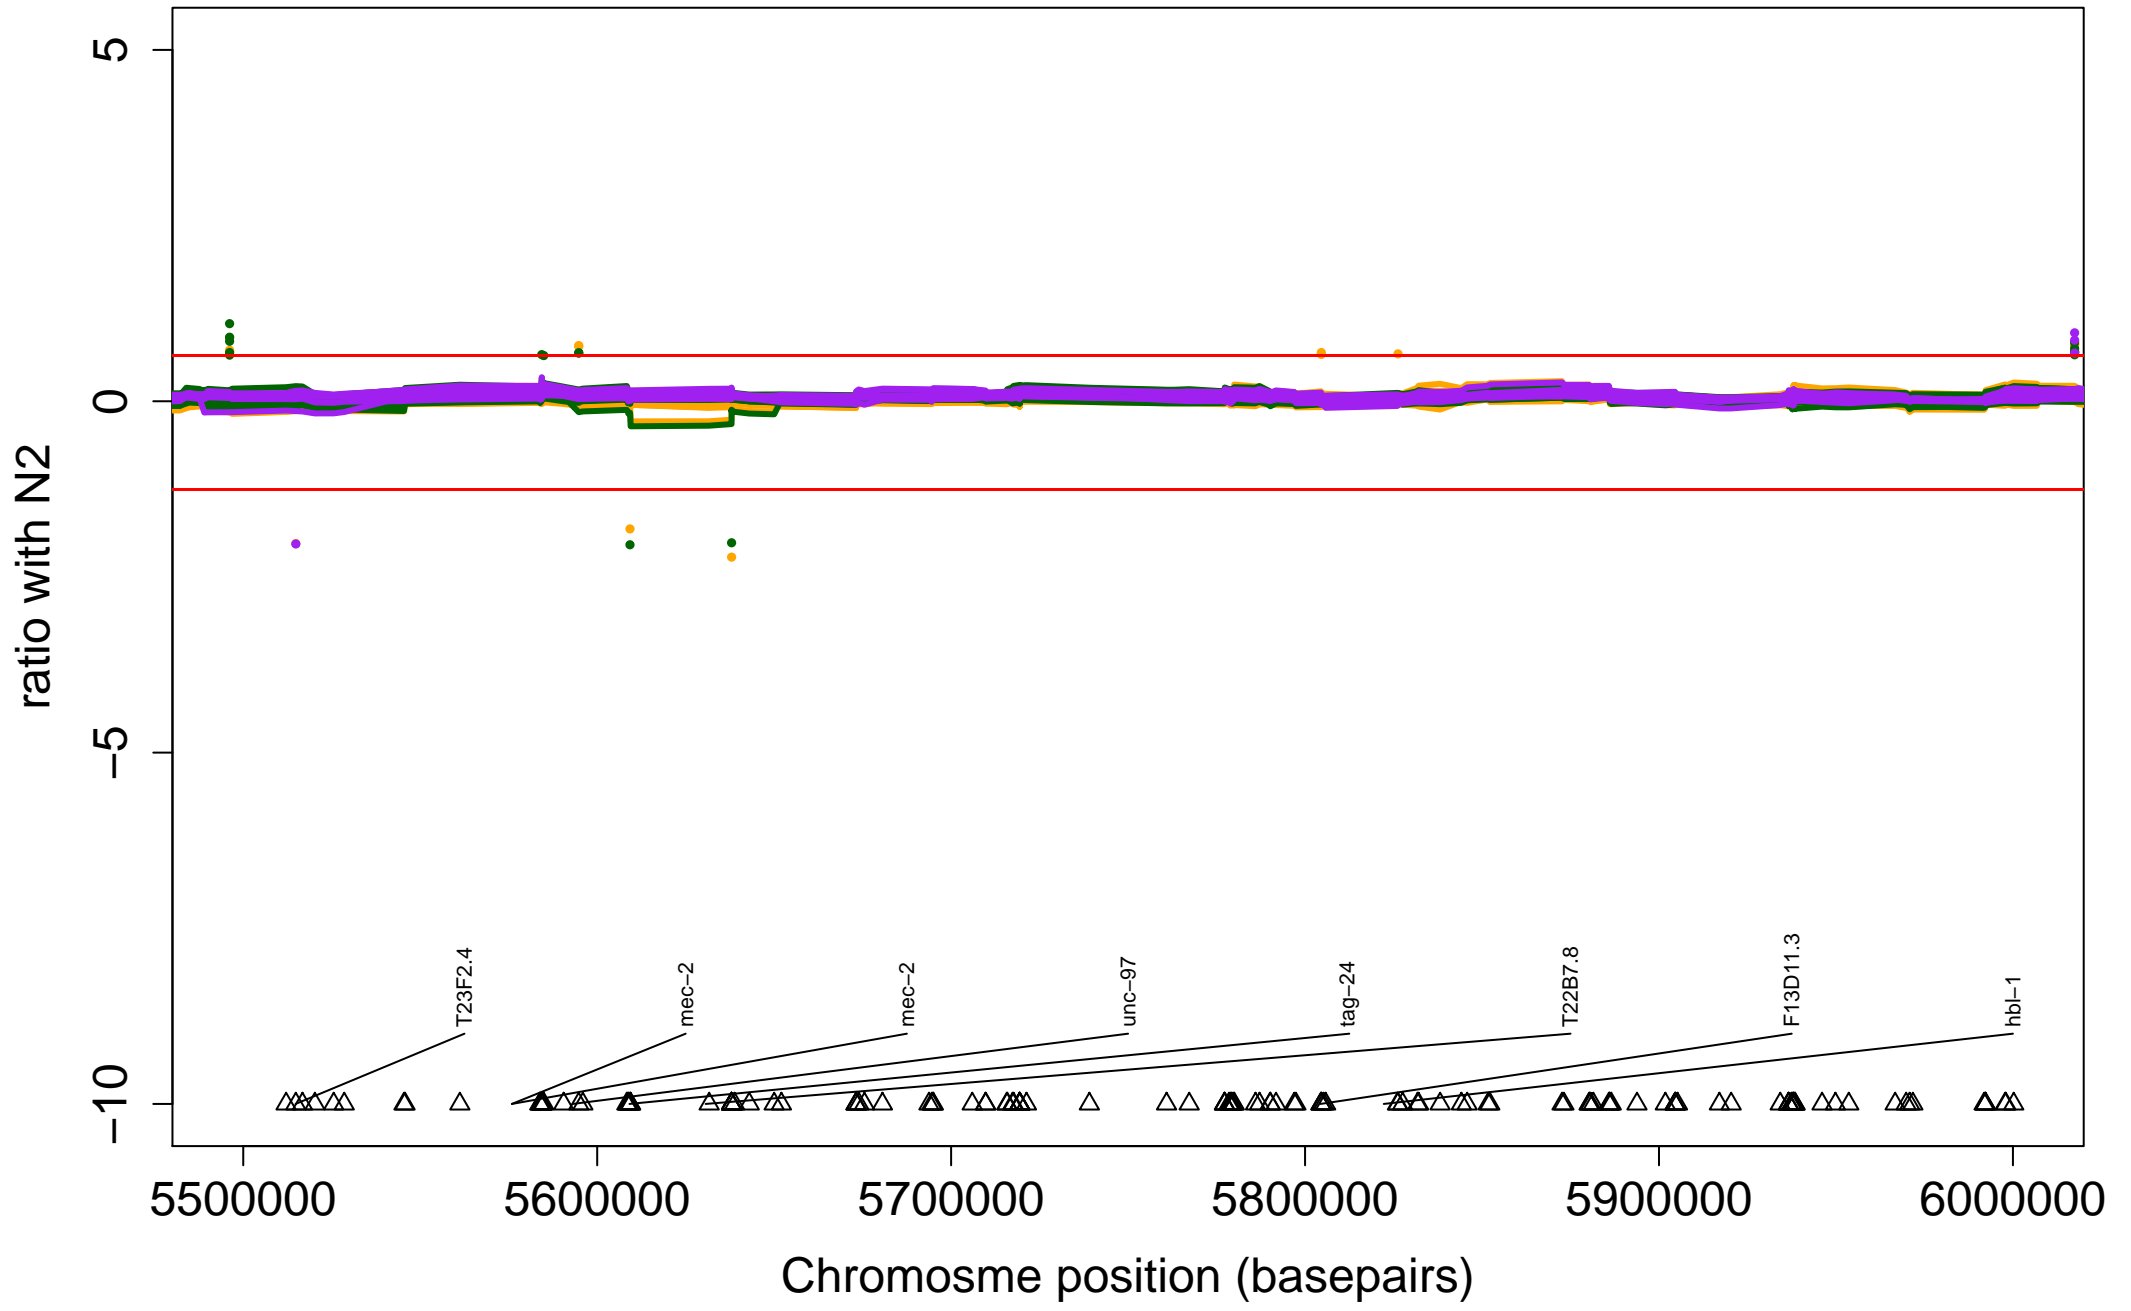

X

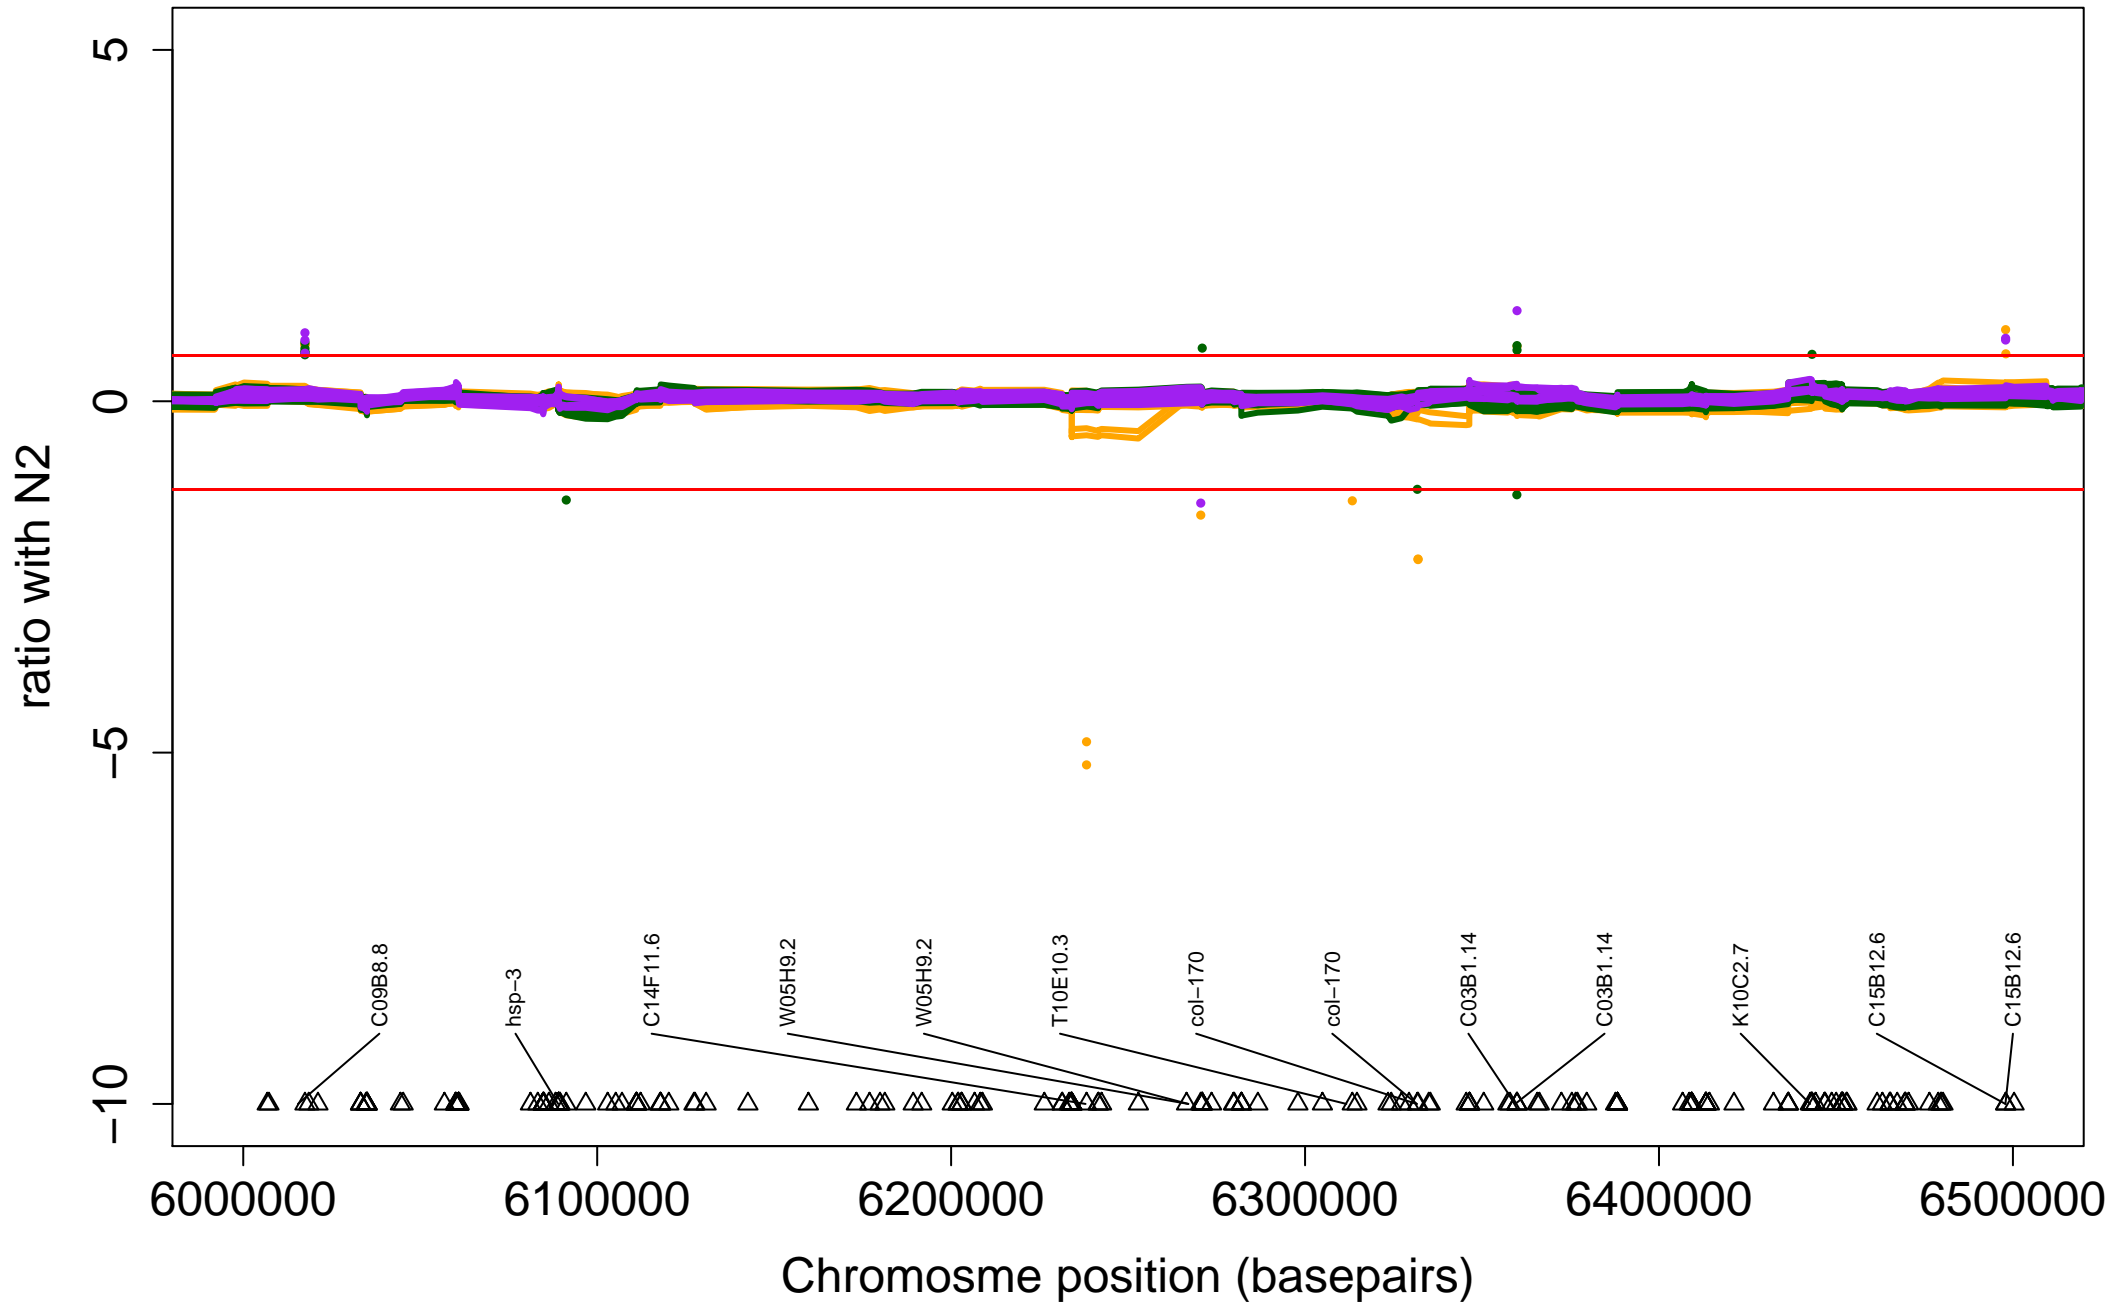



X

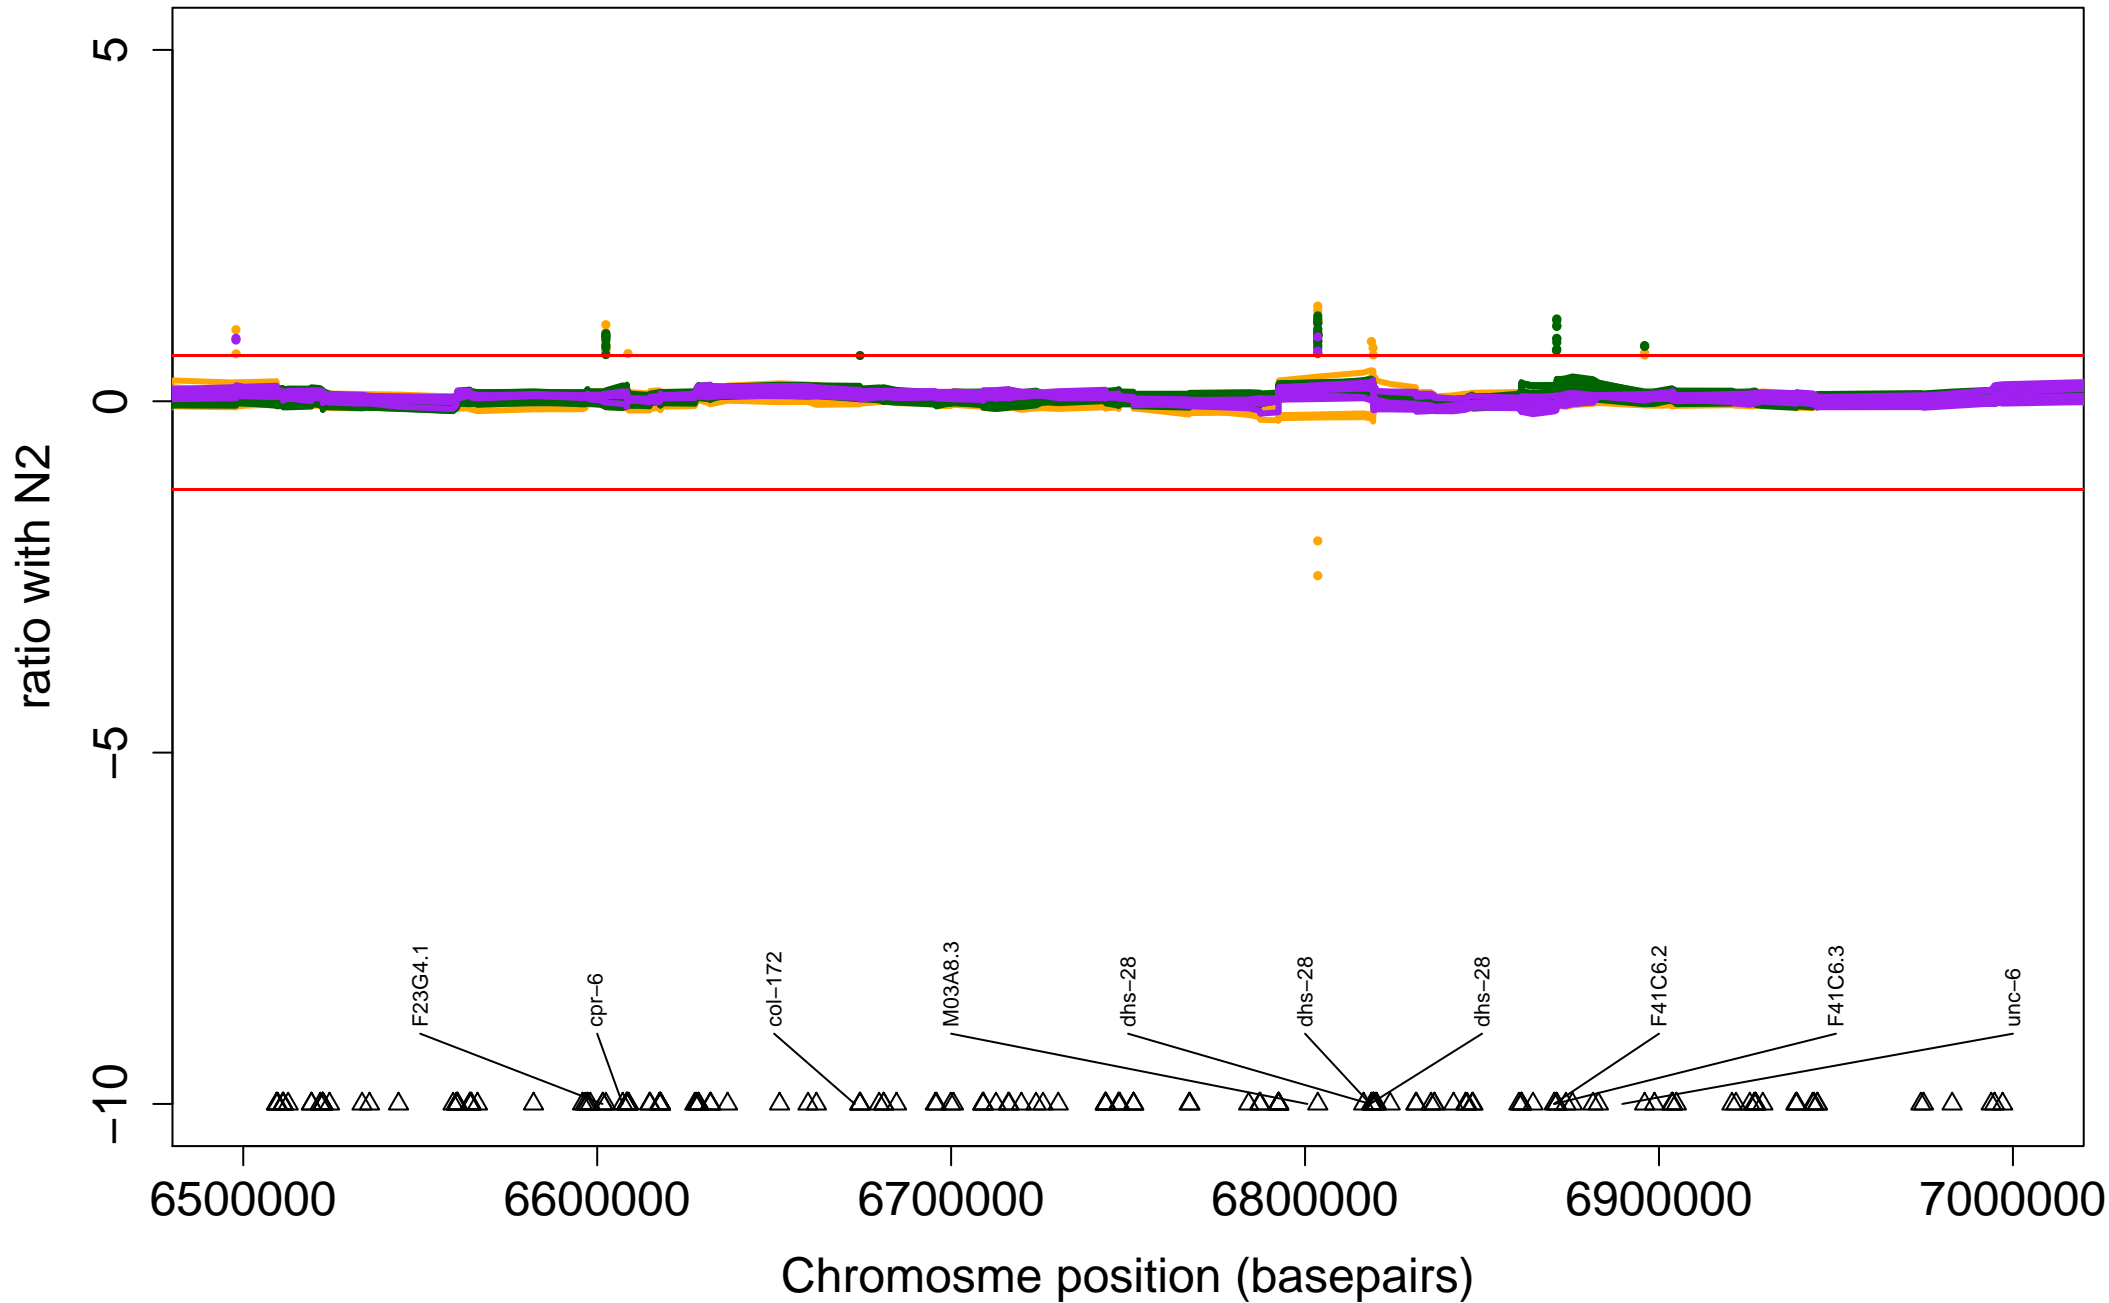

X

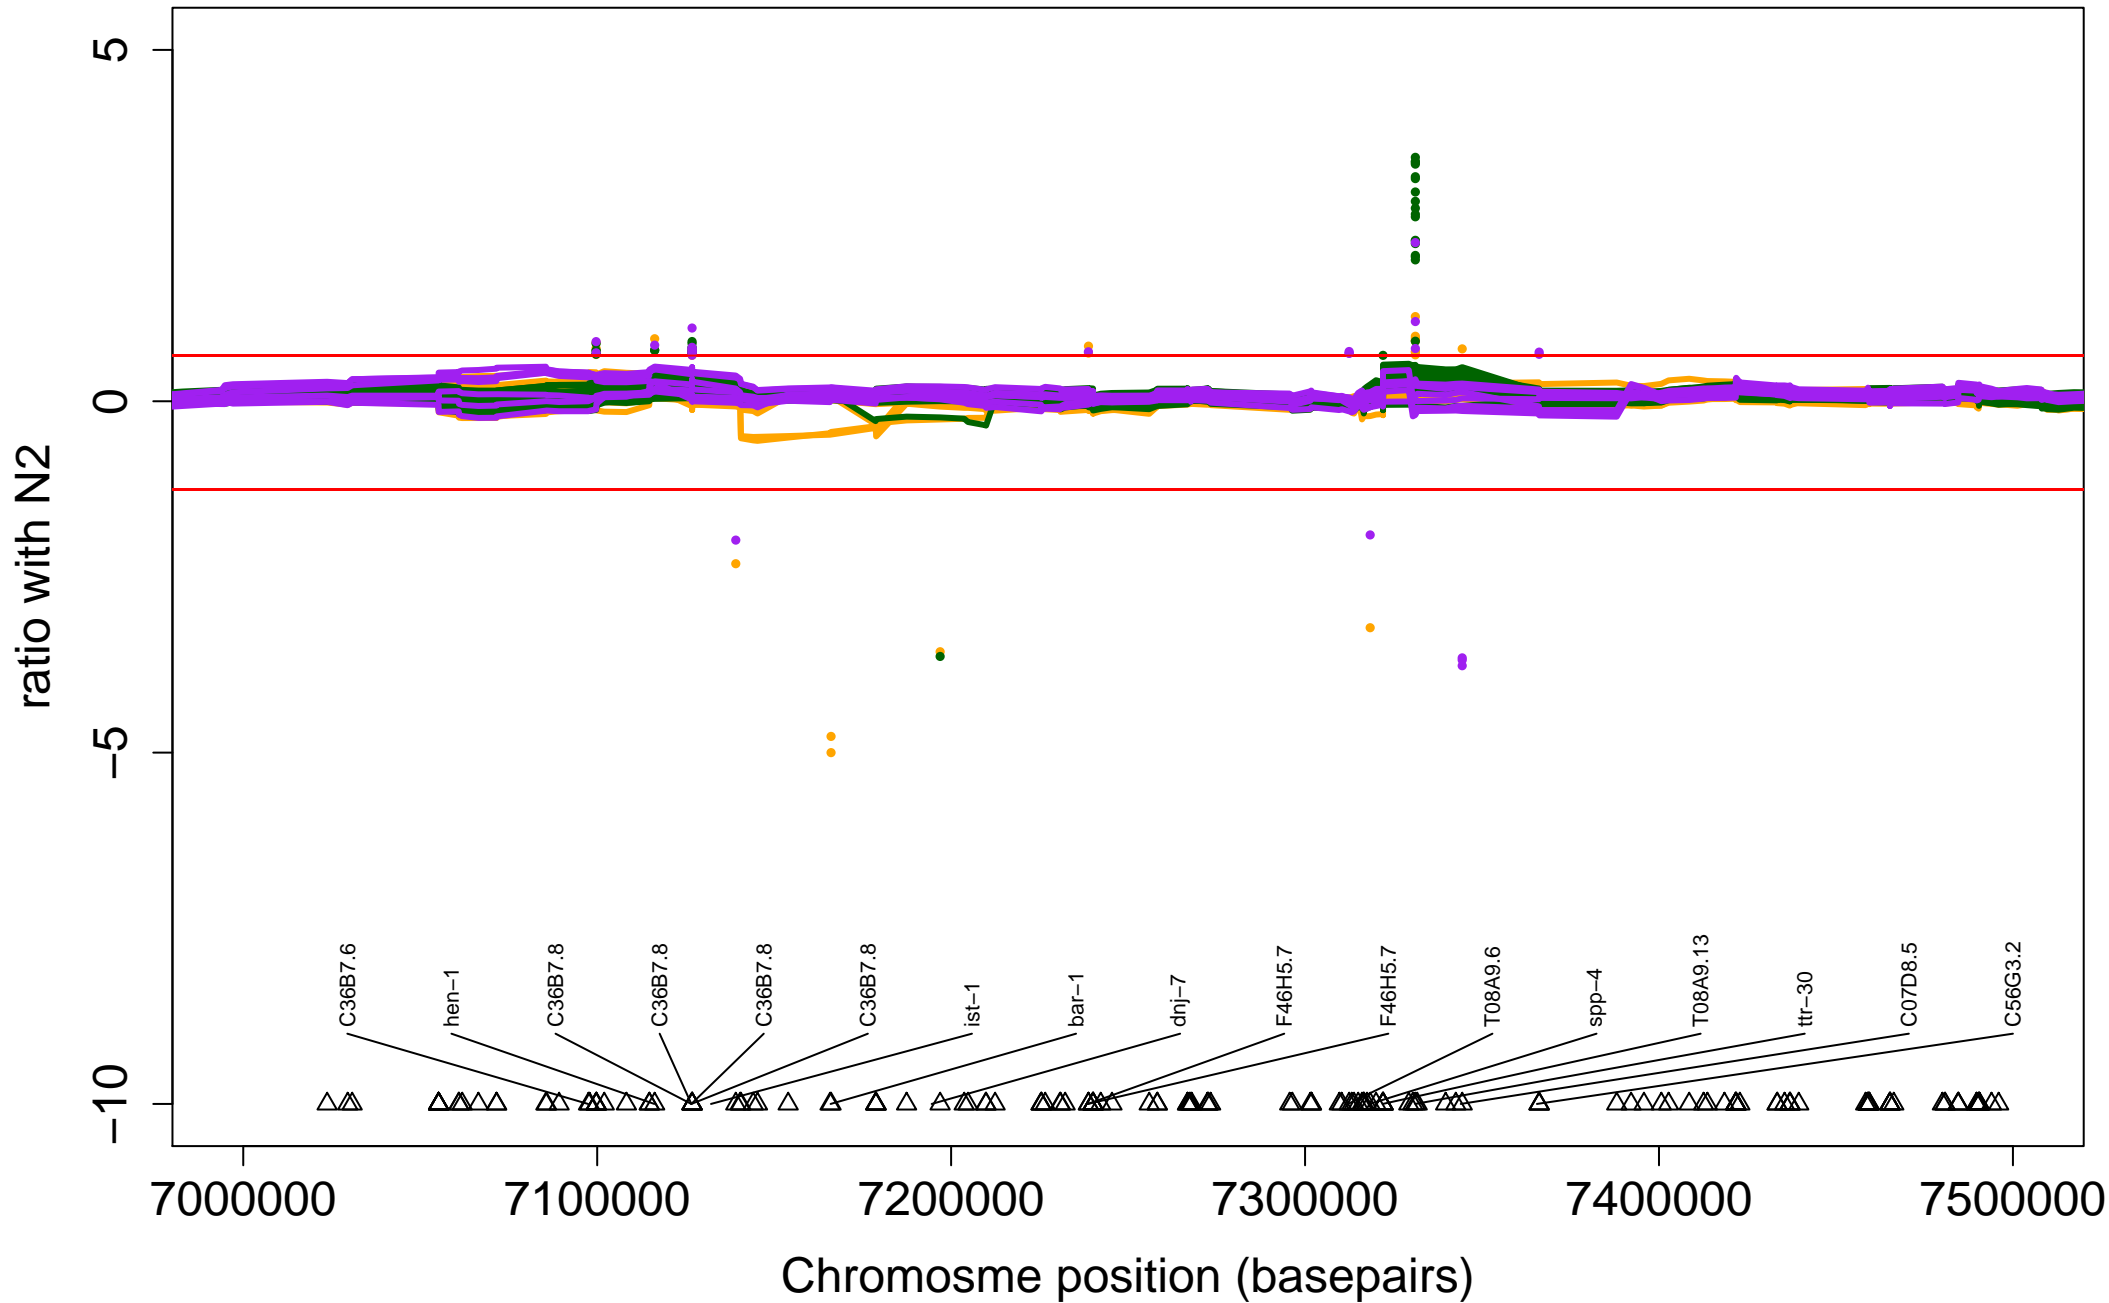

X

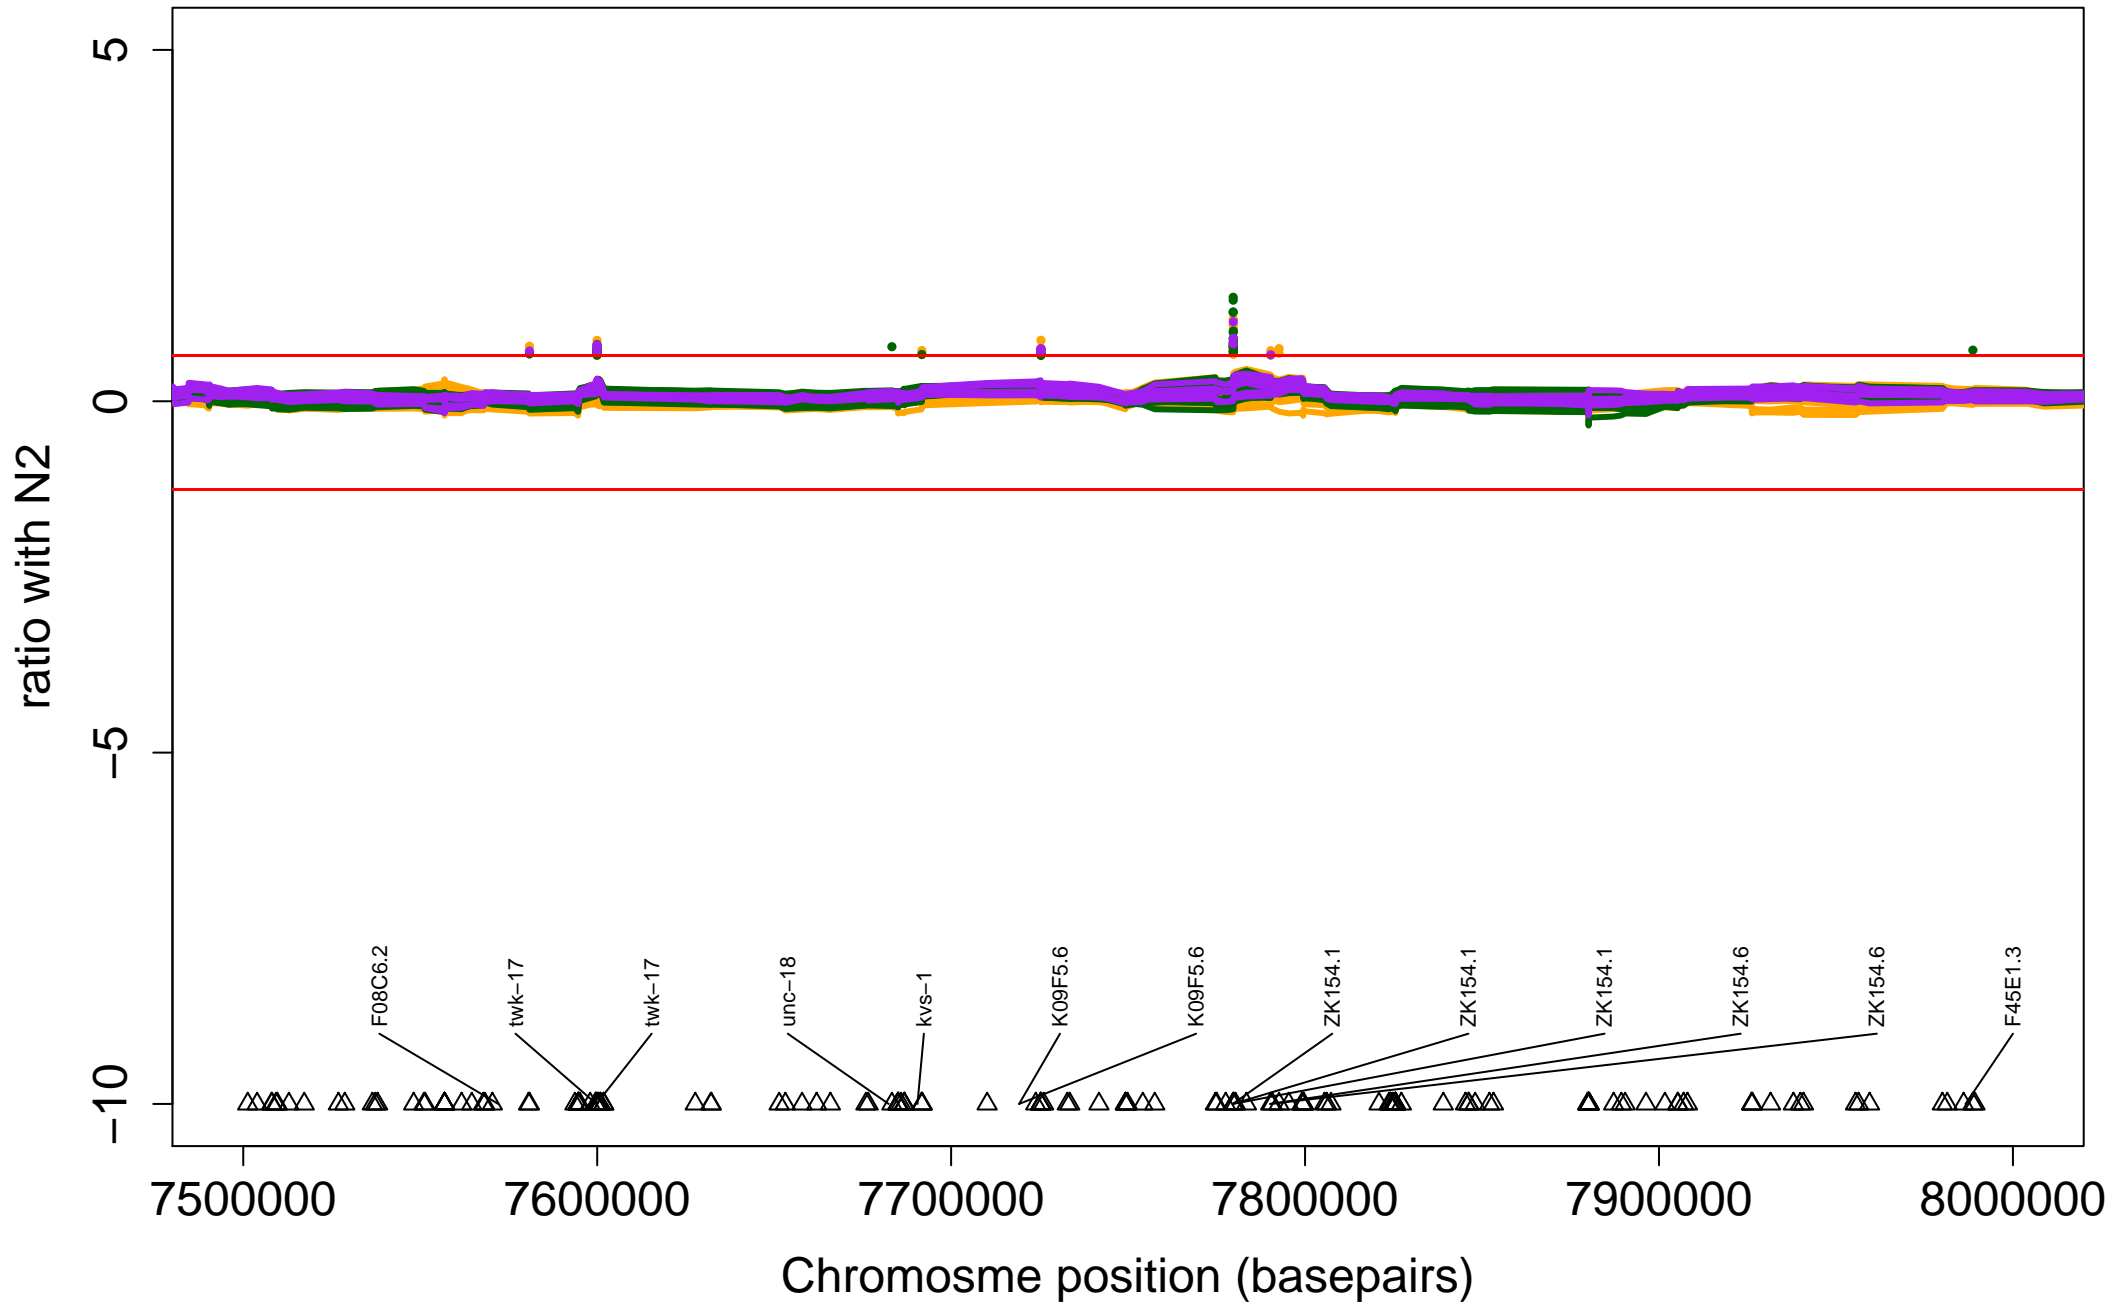

X

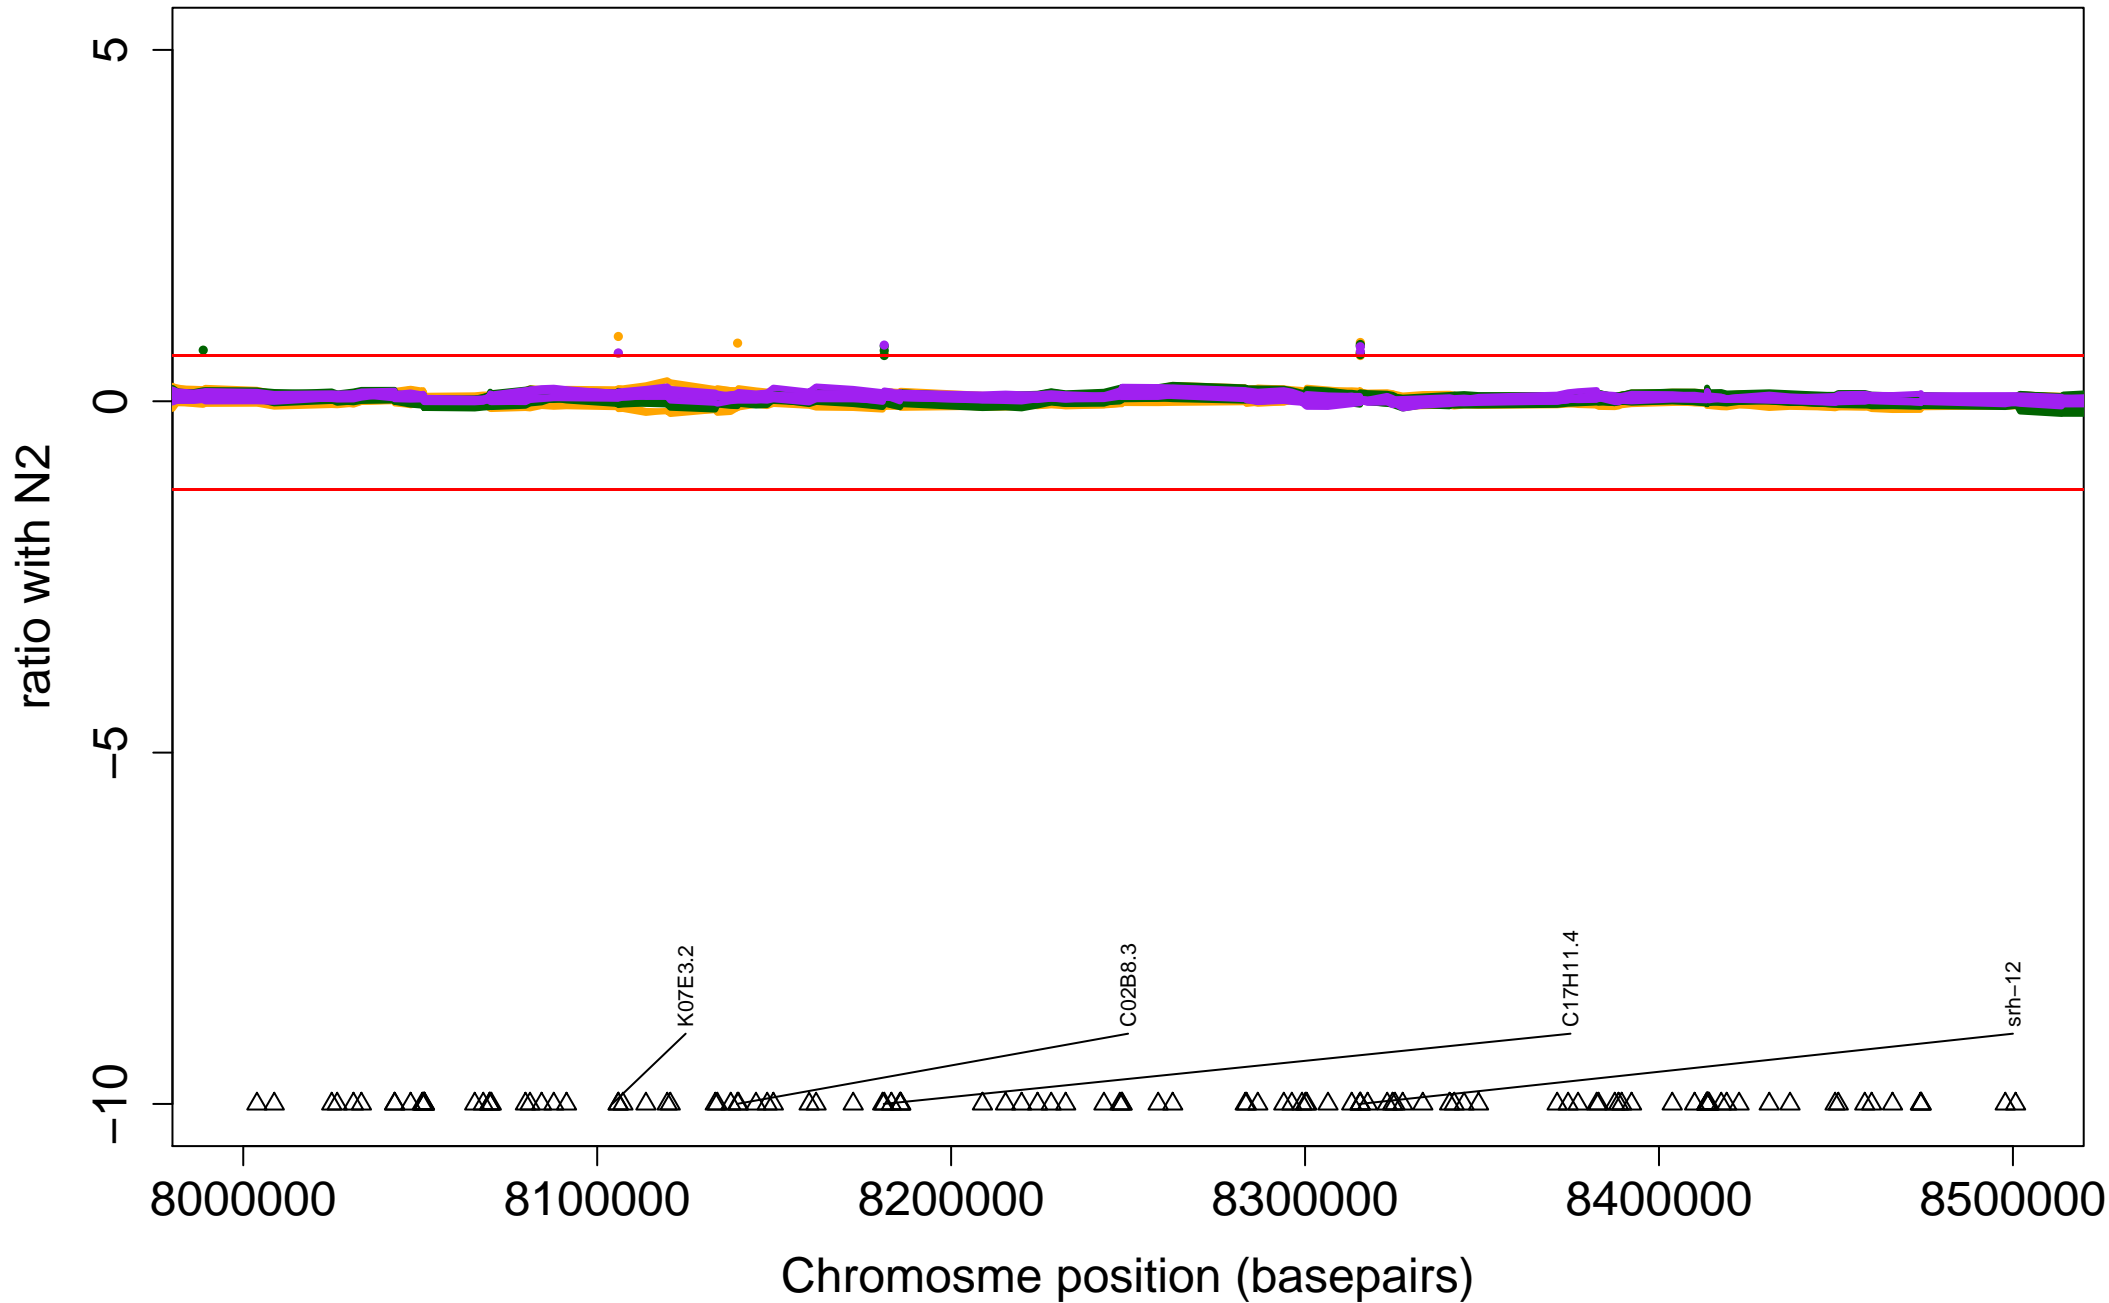

X

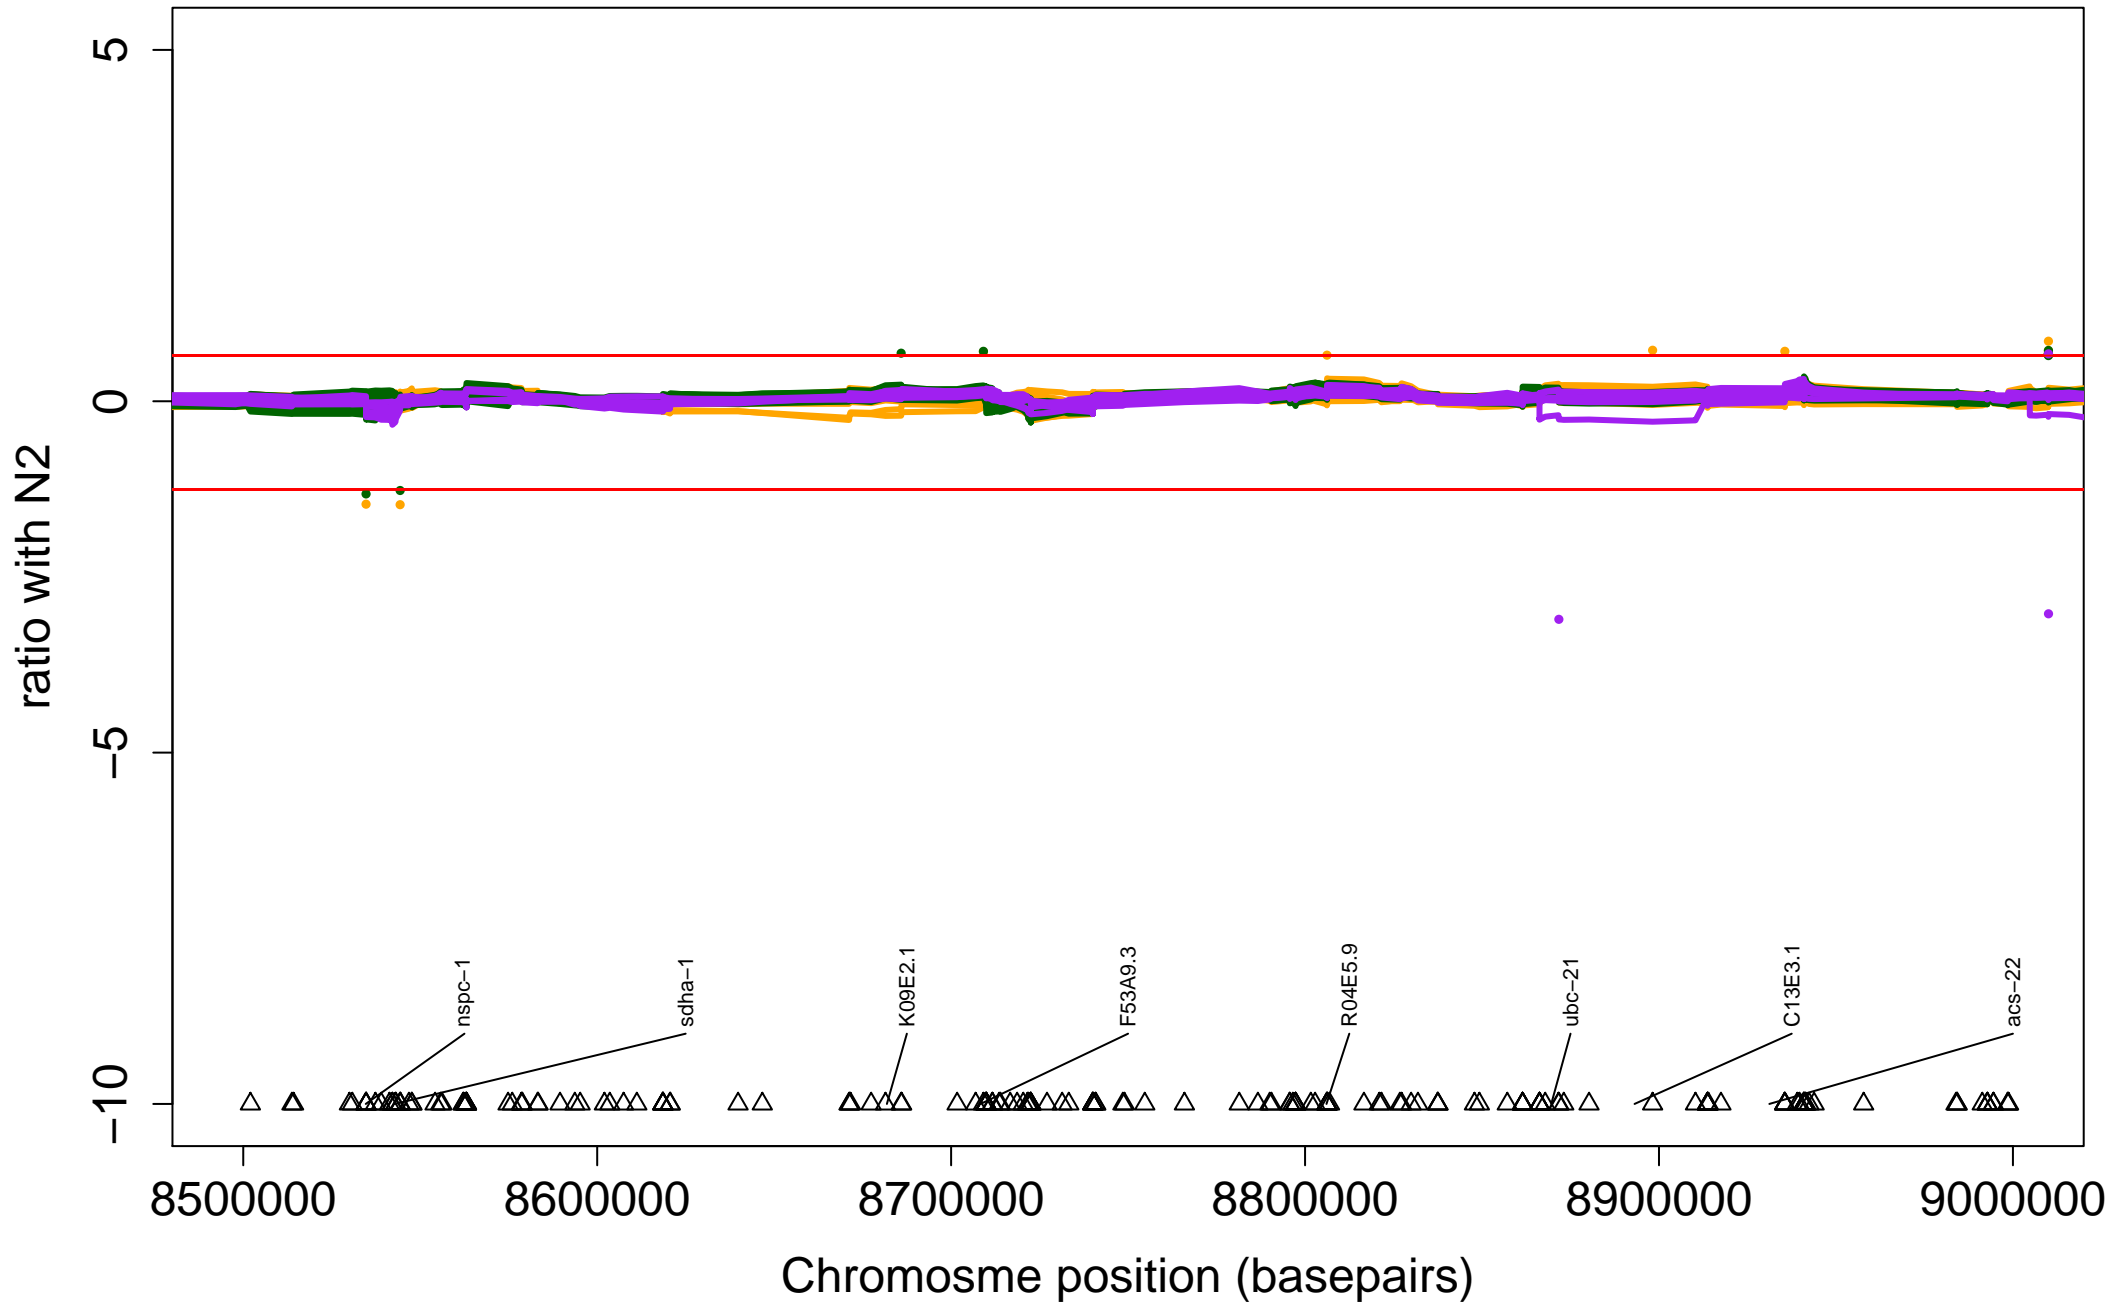

X

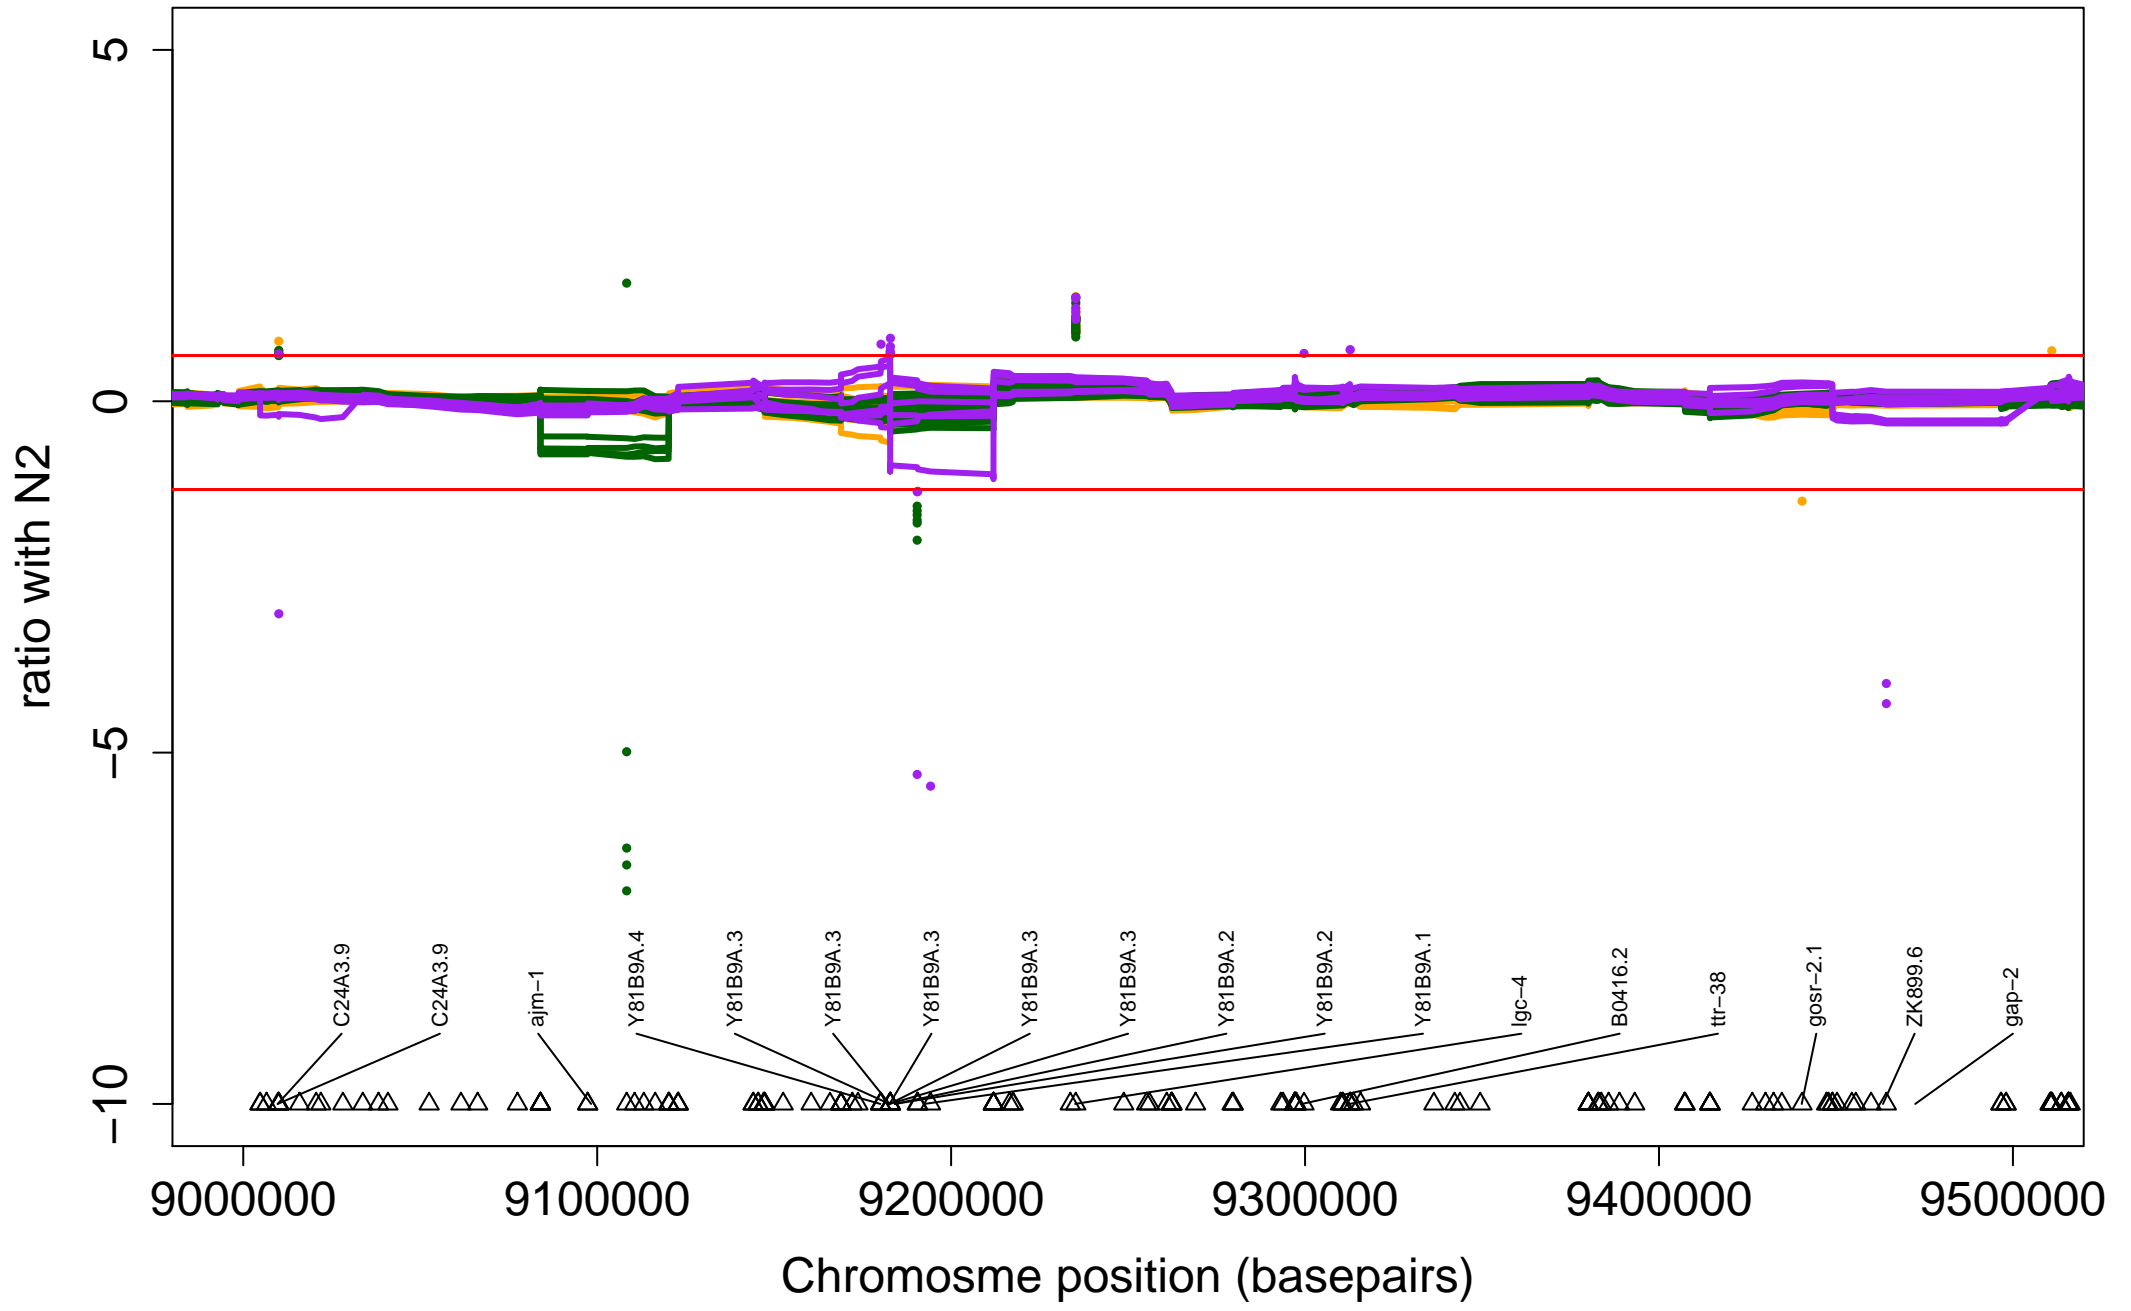

X

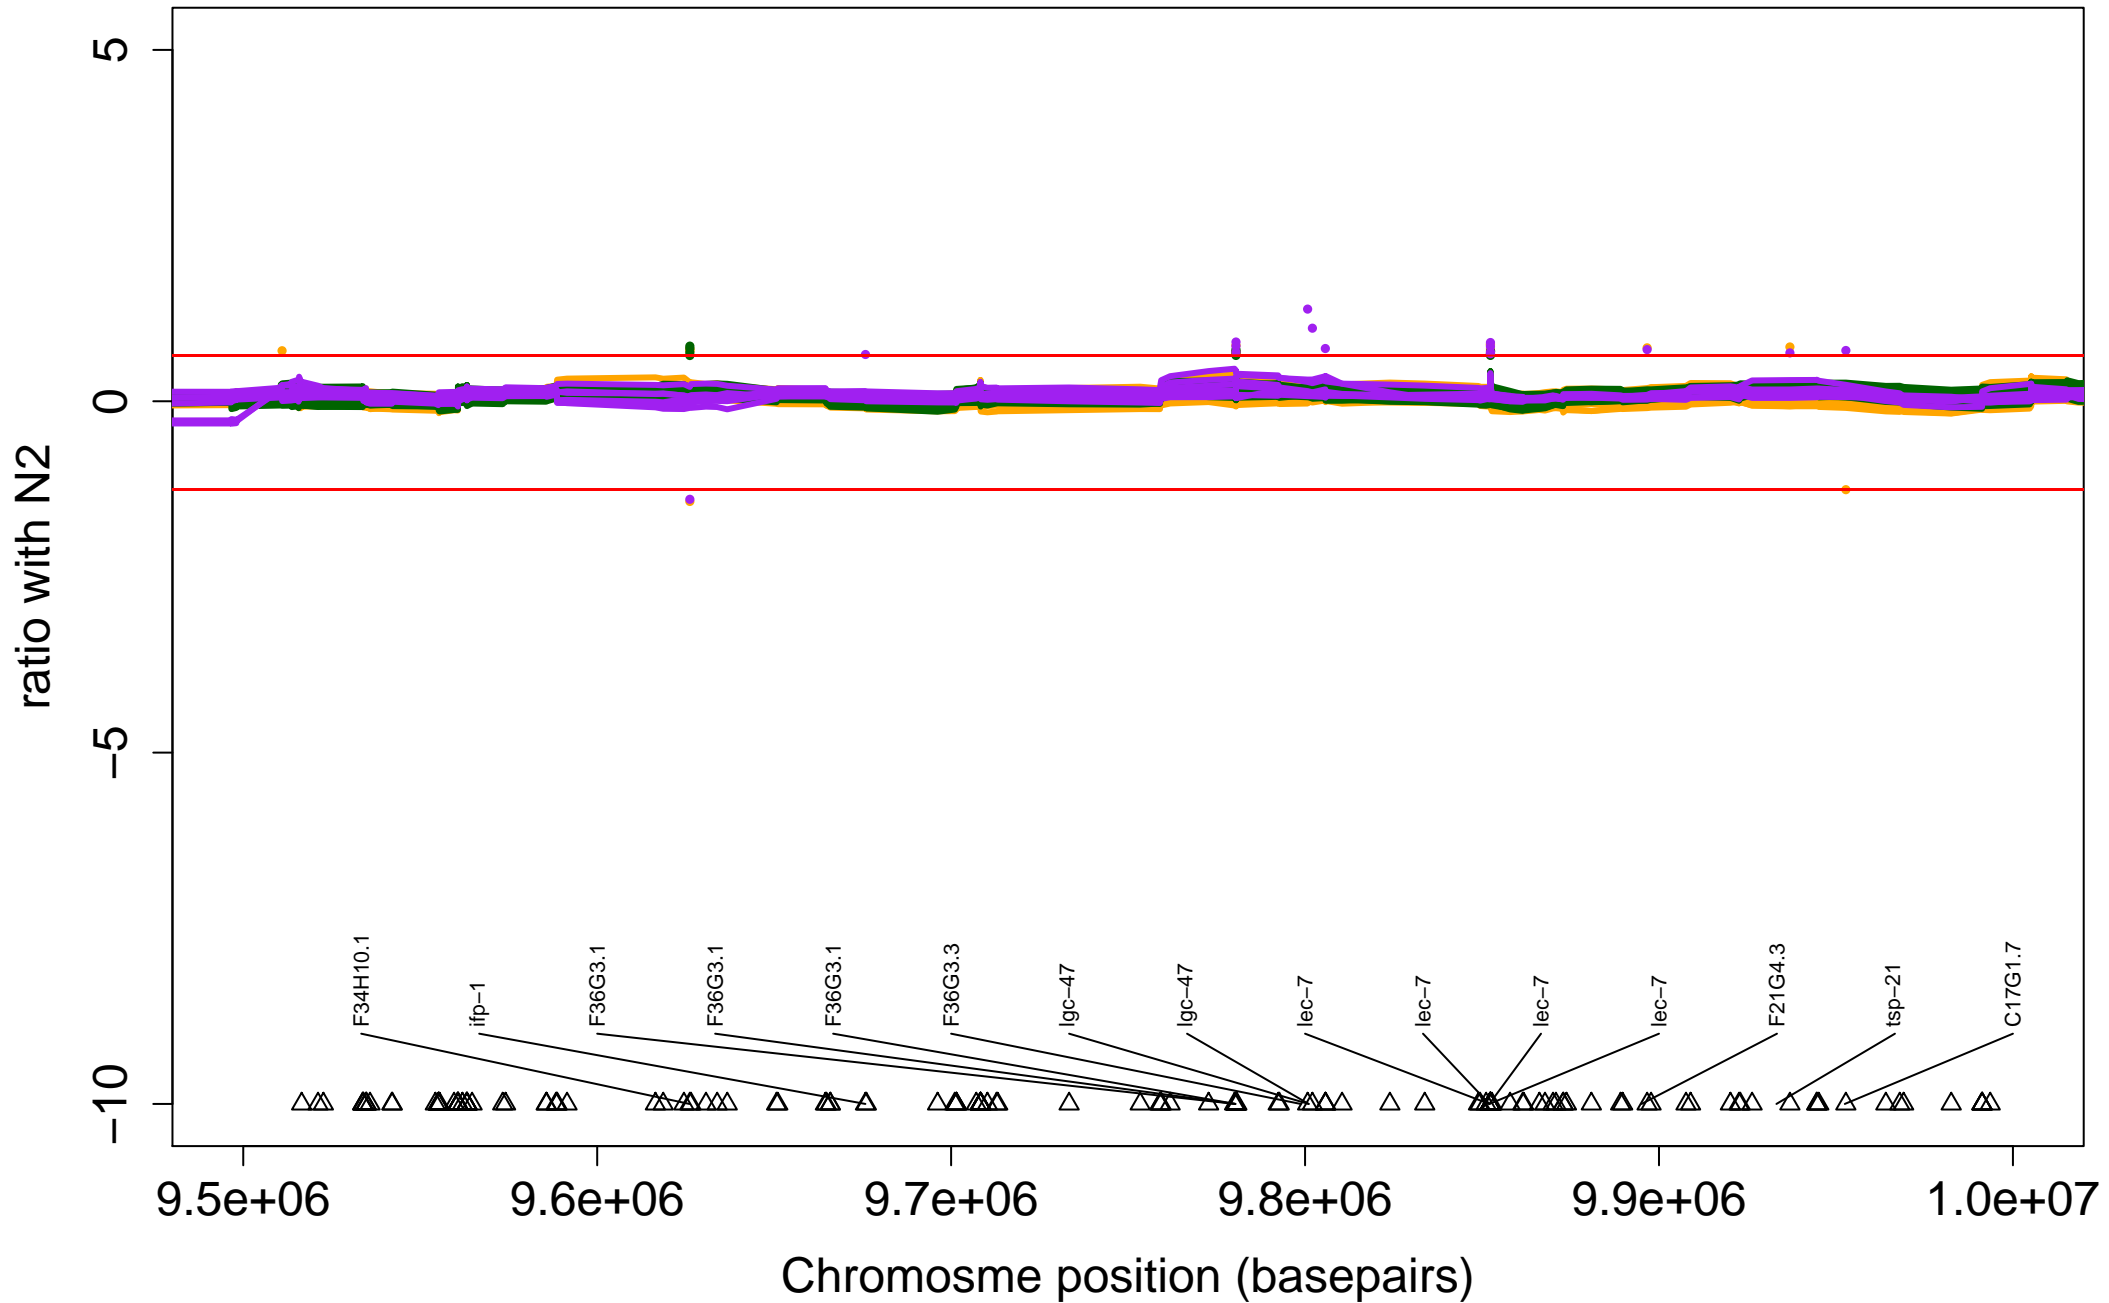

X

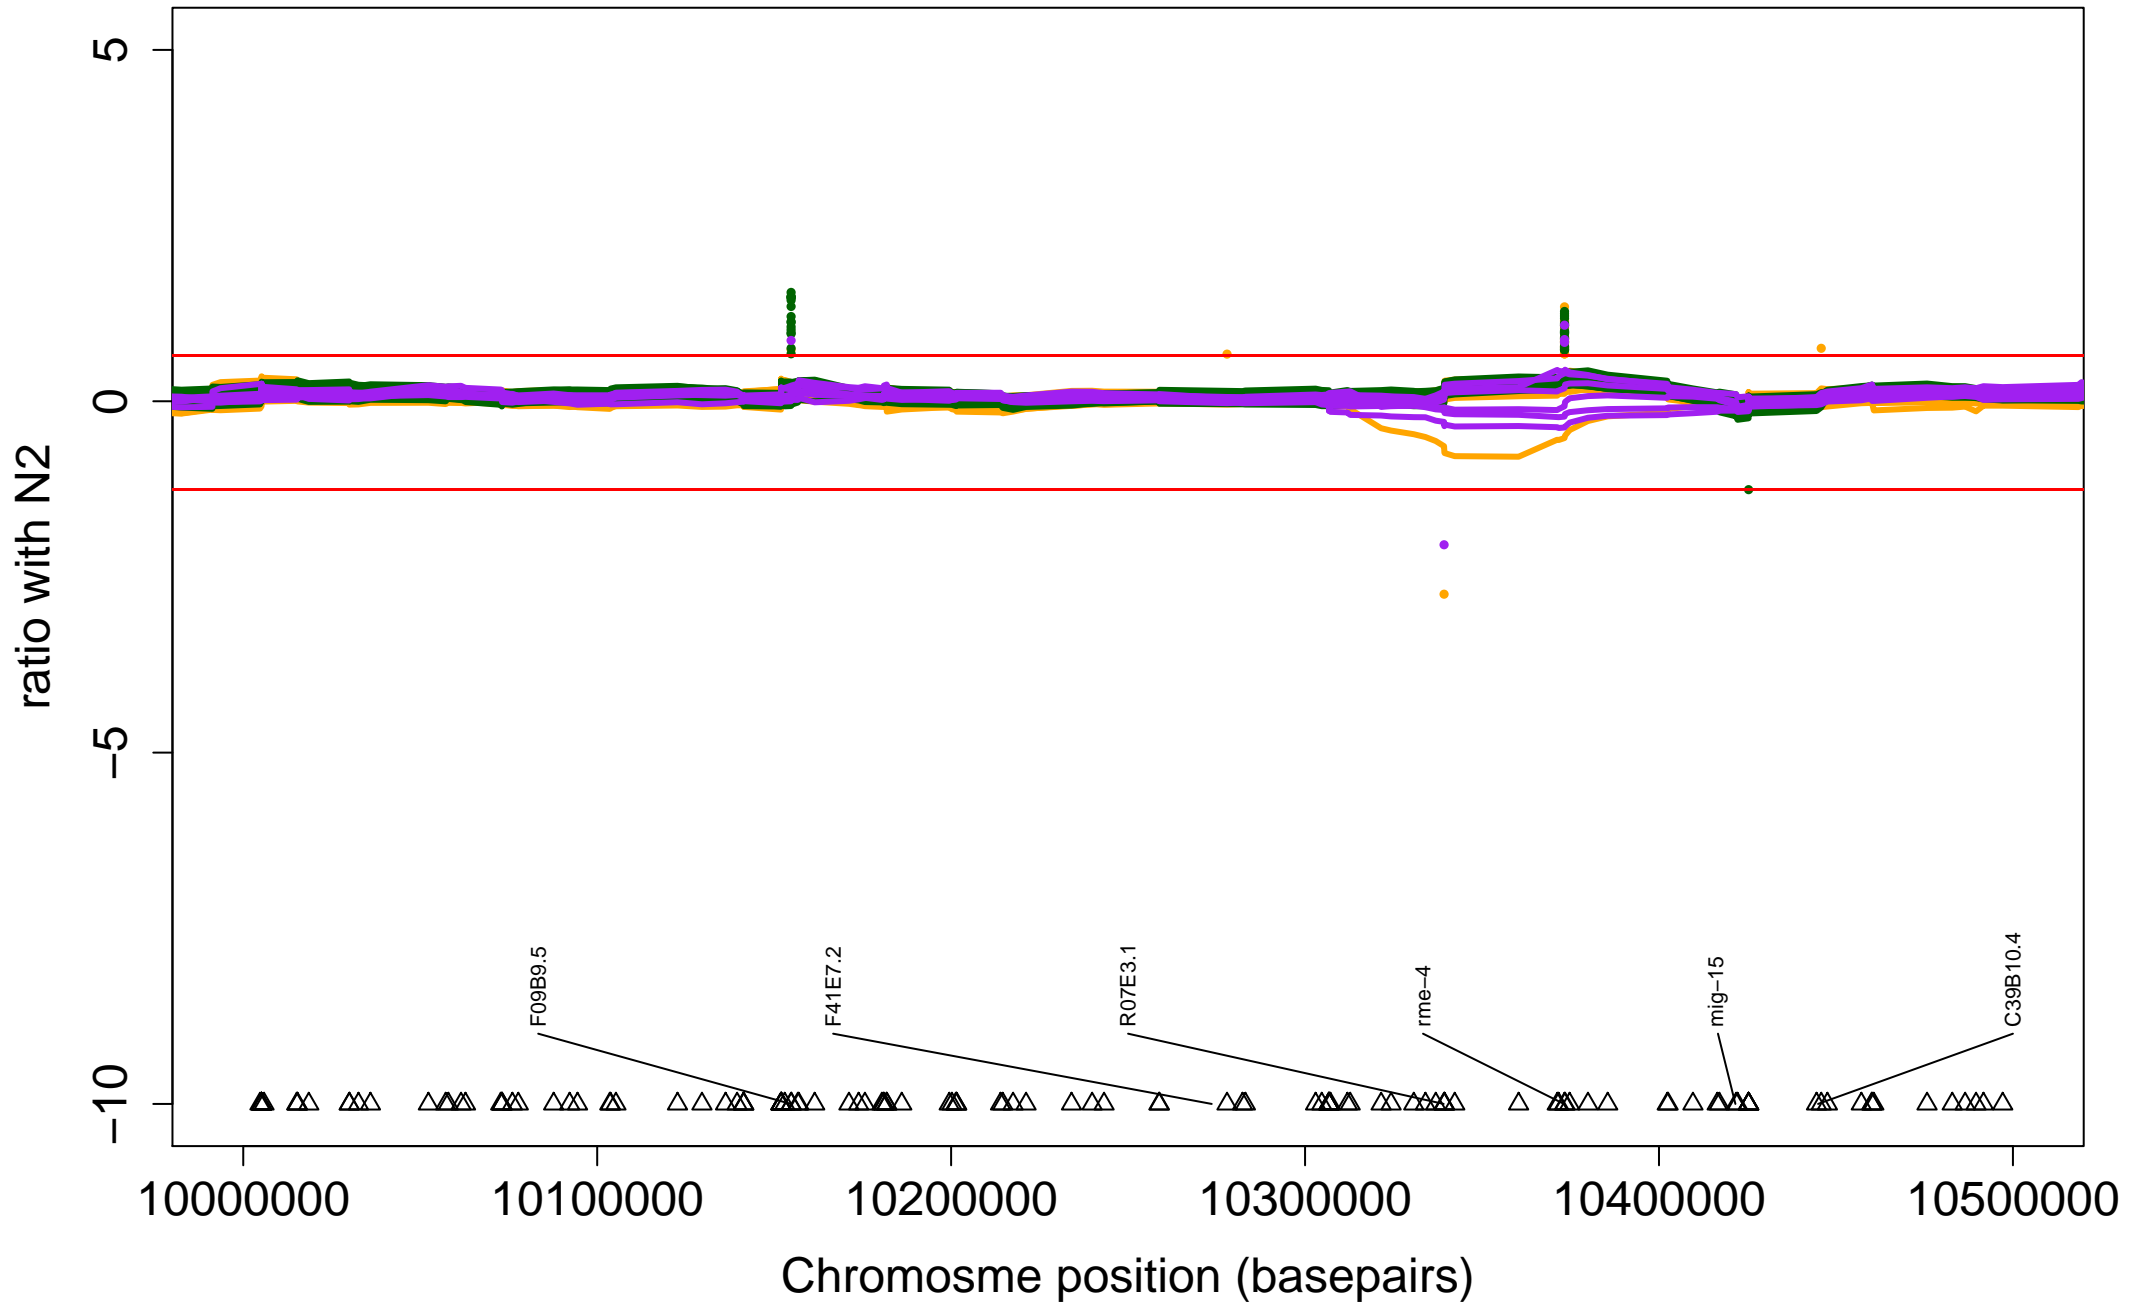



x

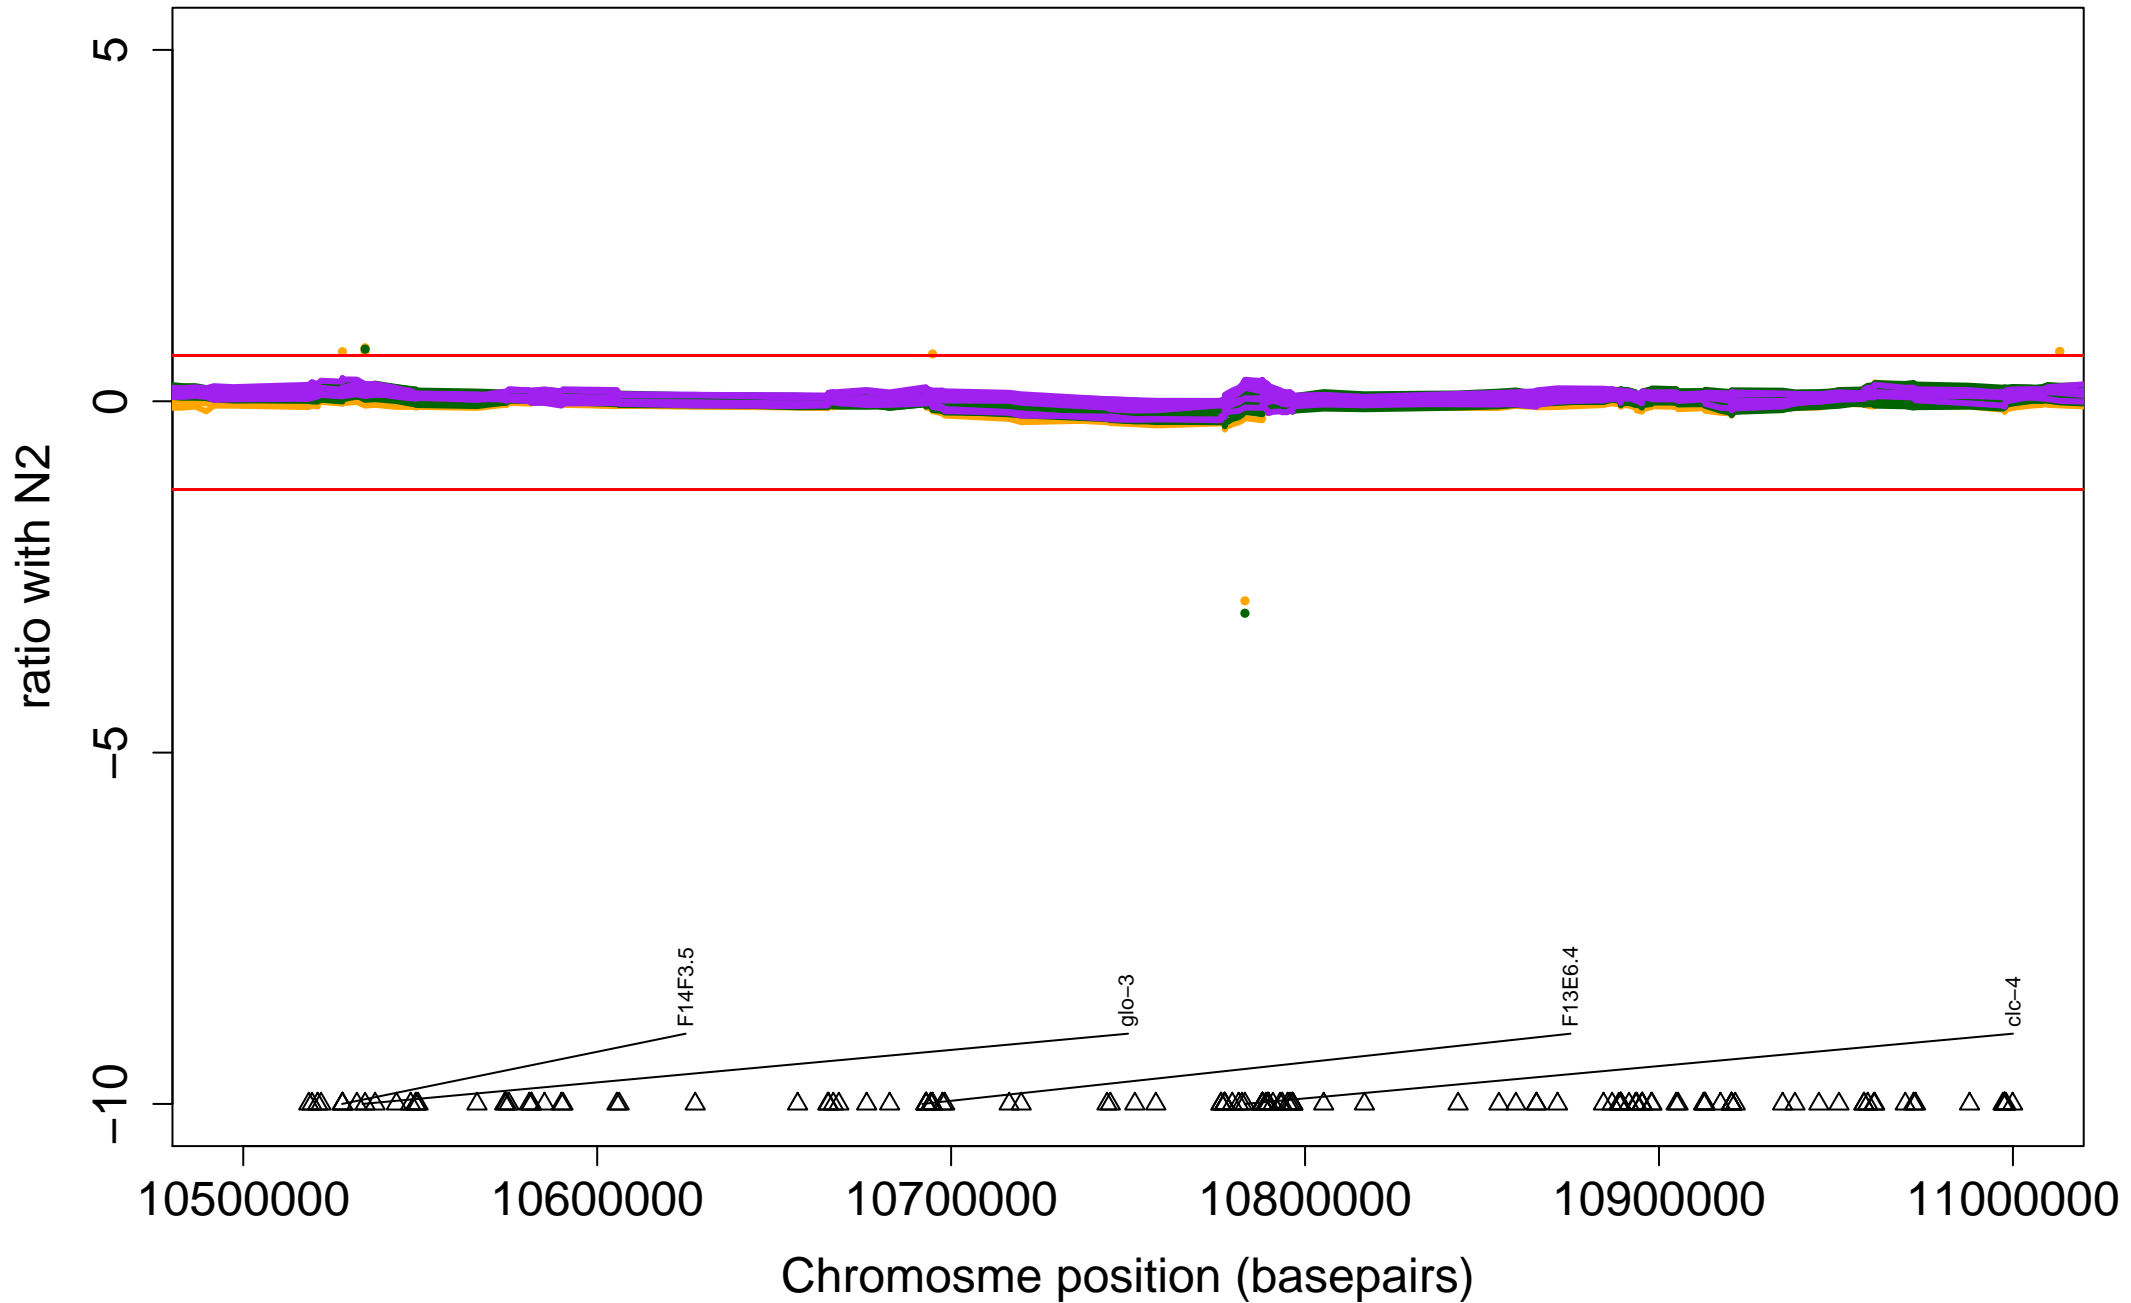

X

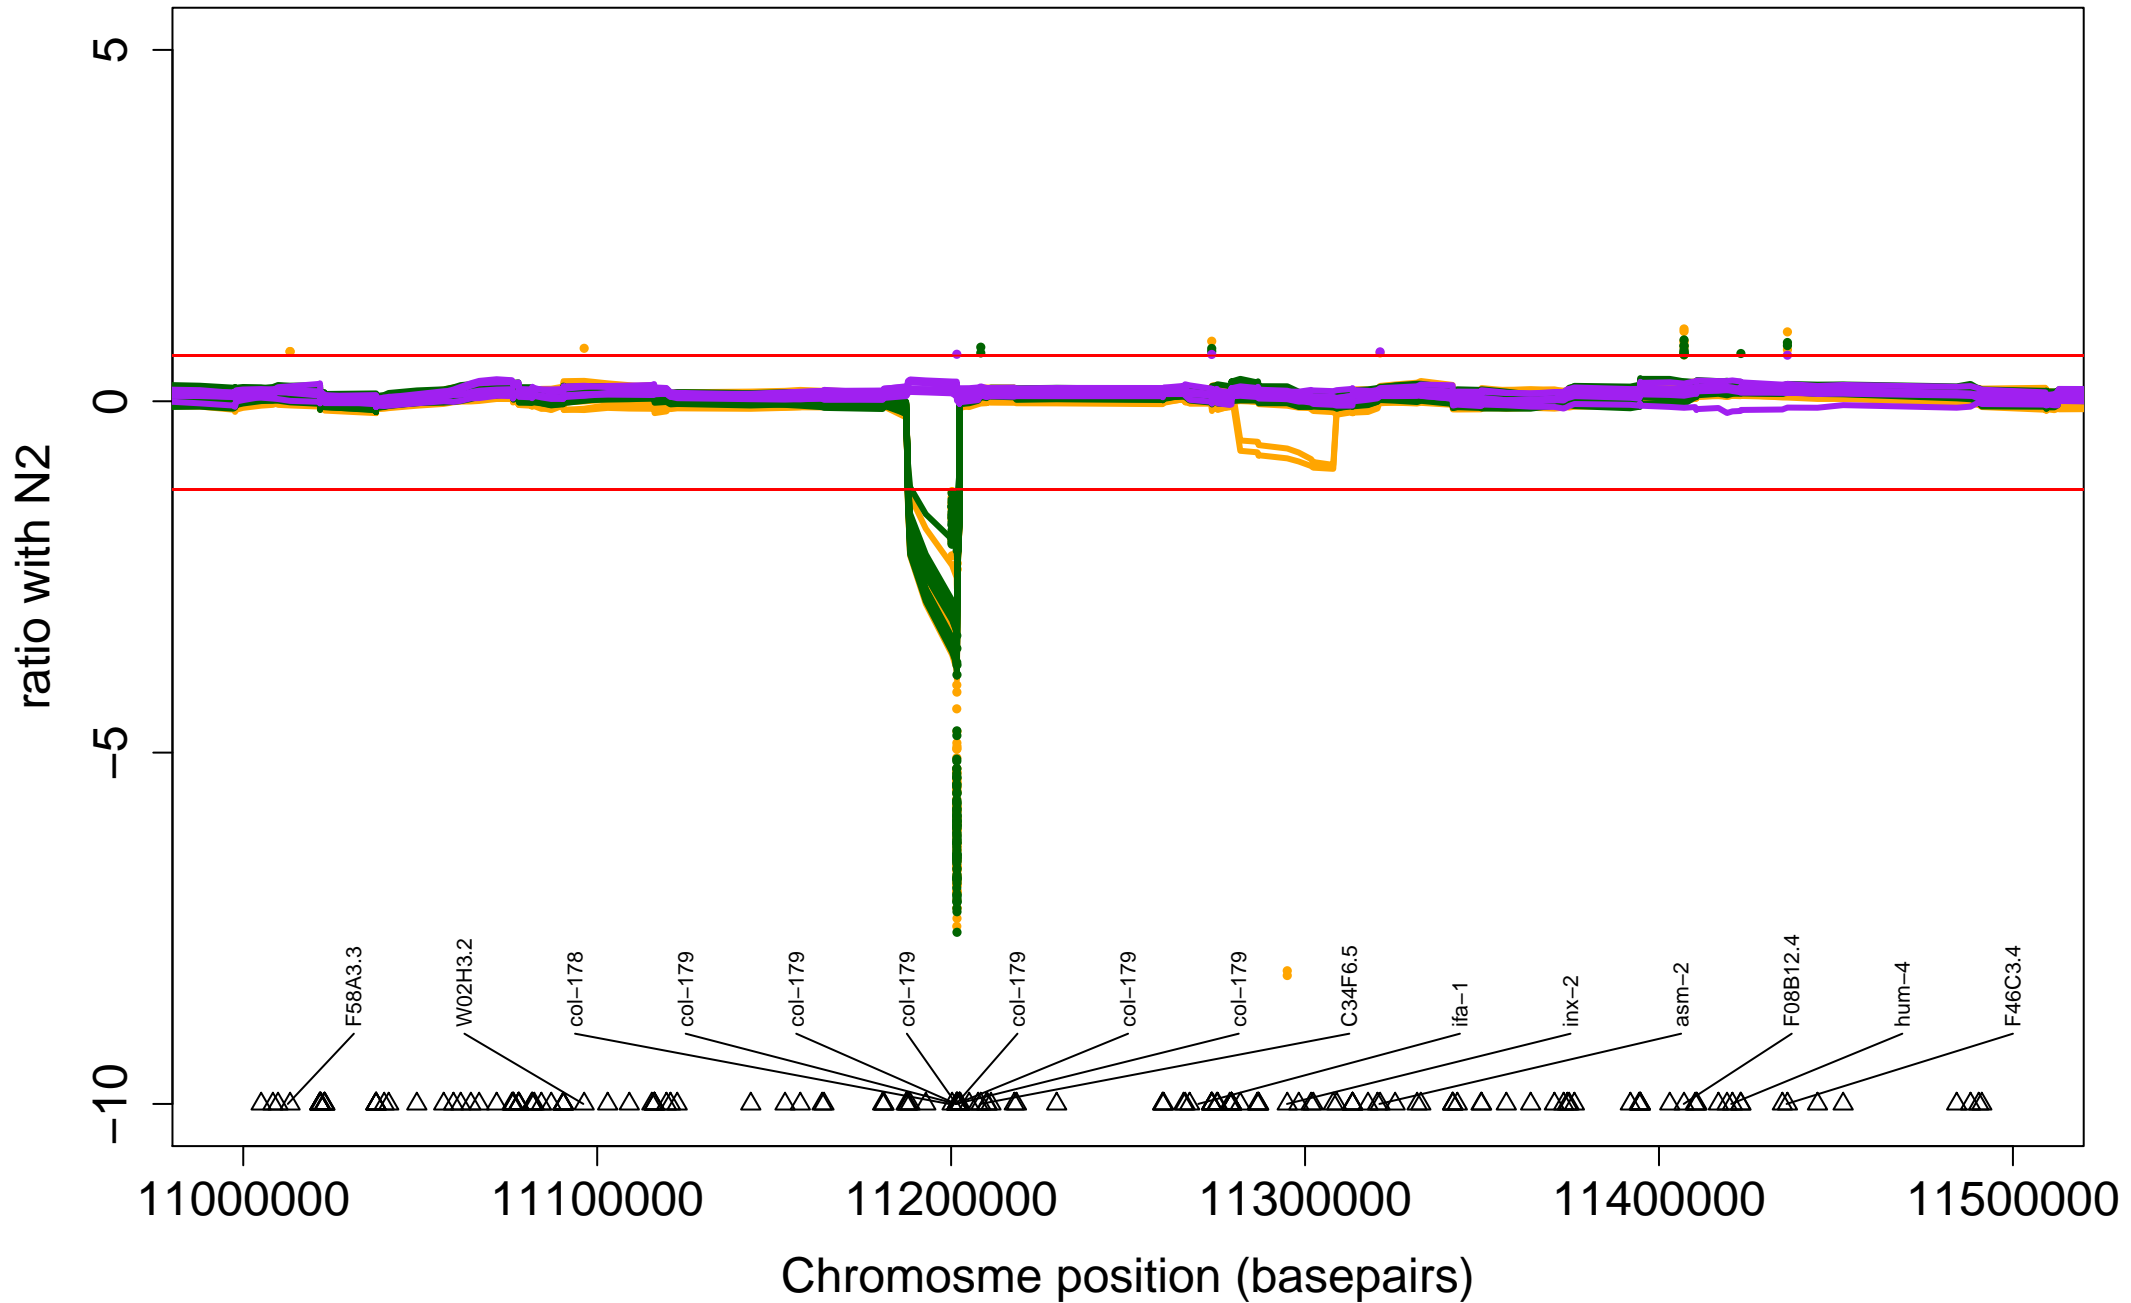

X

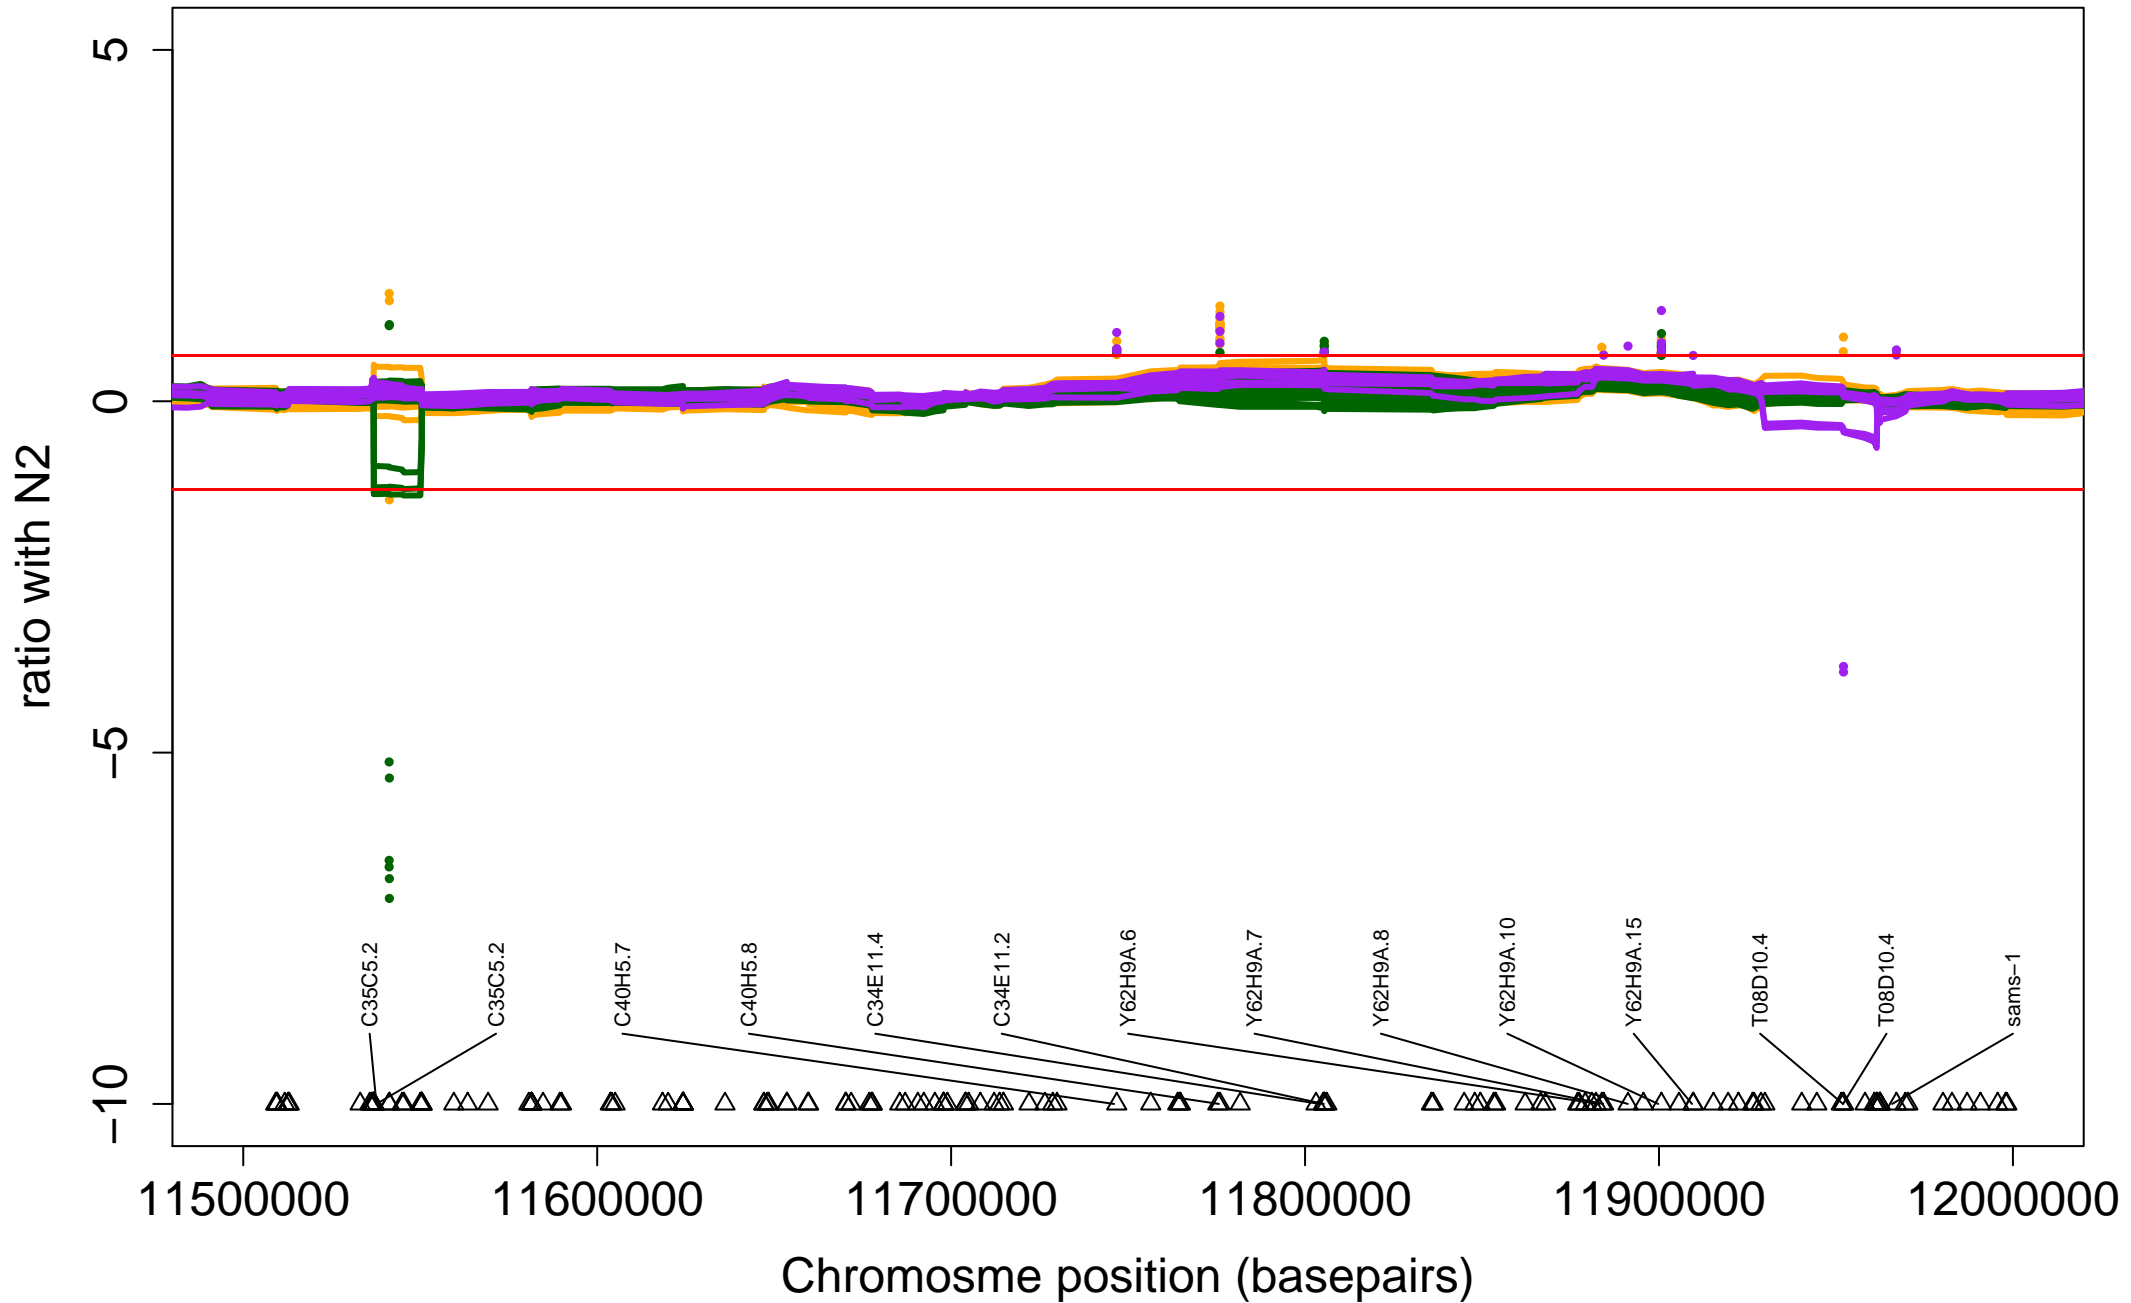

X

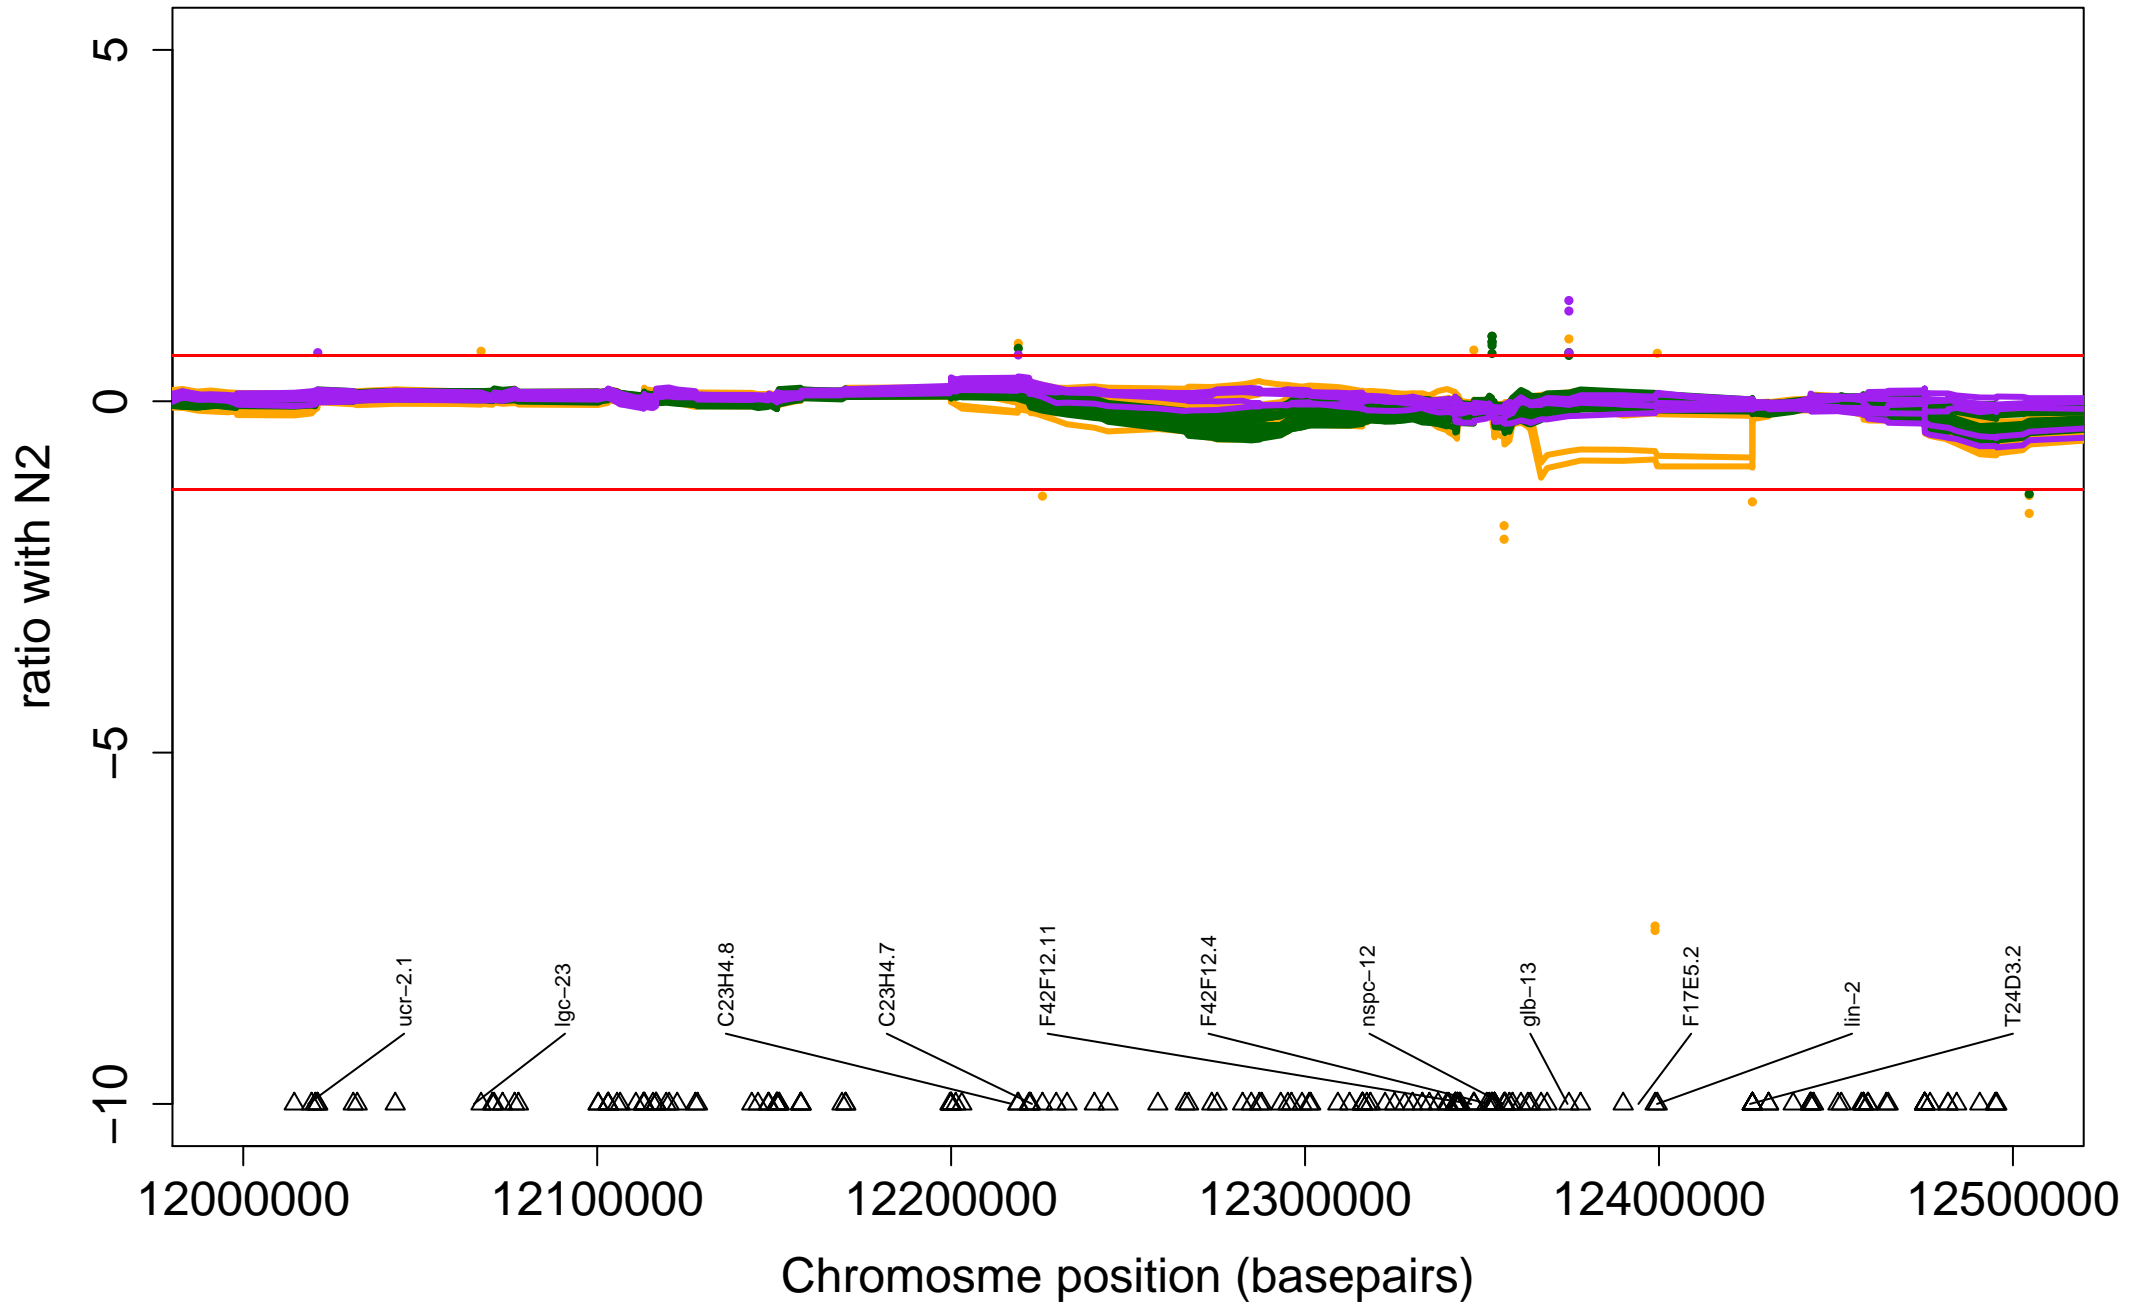

X

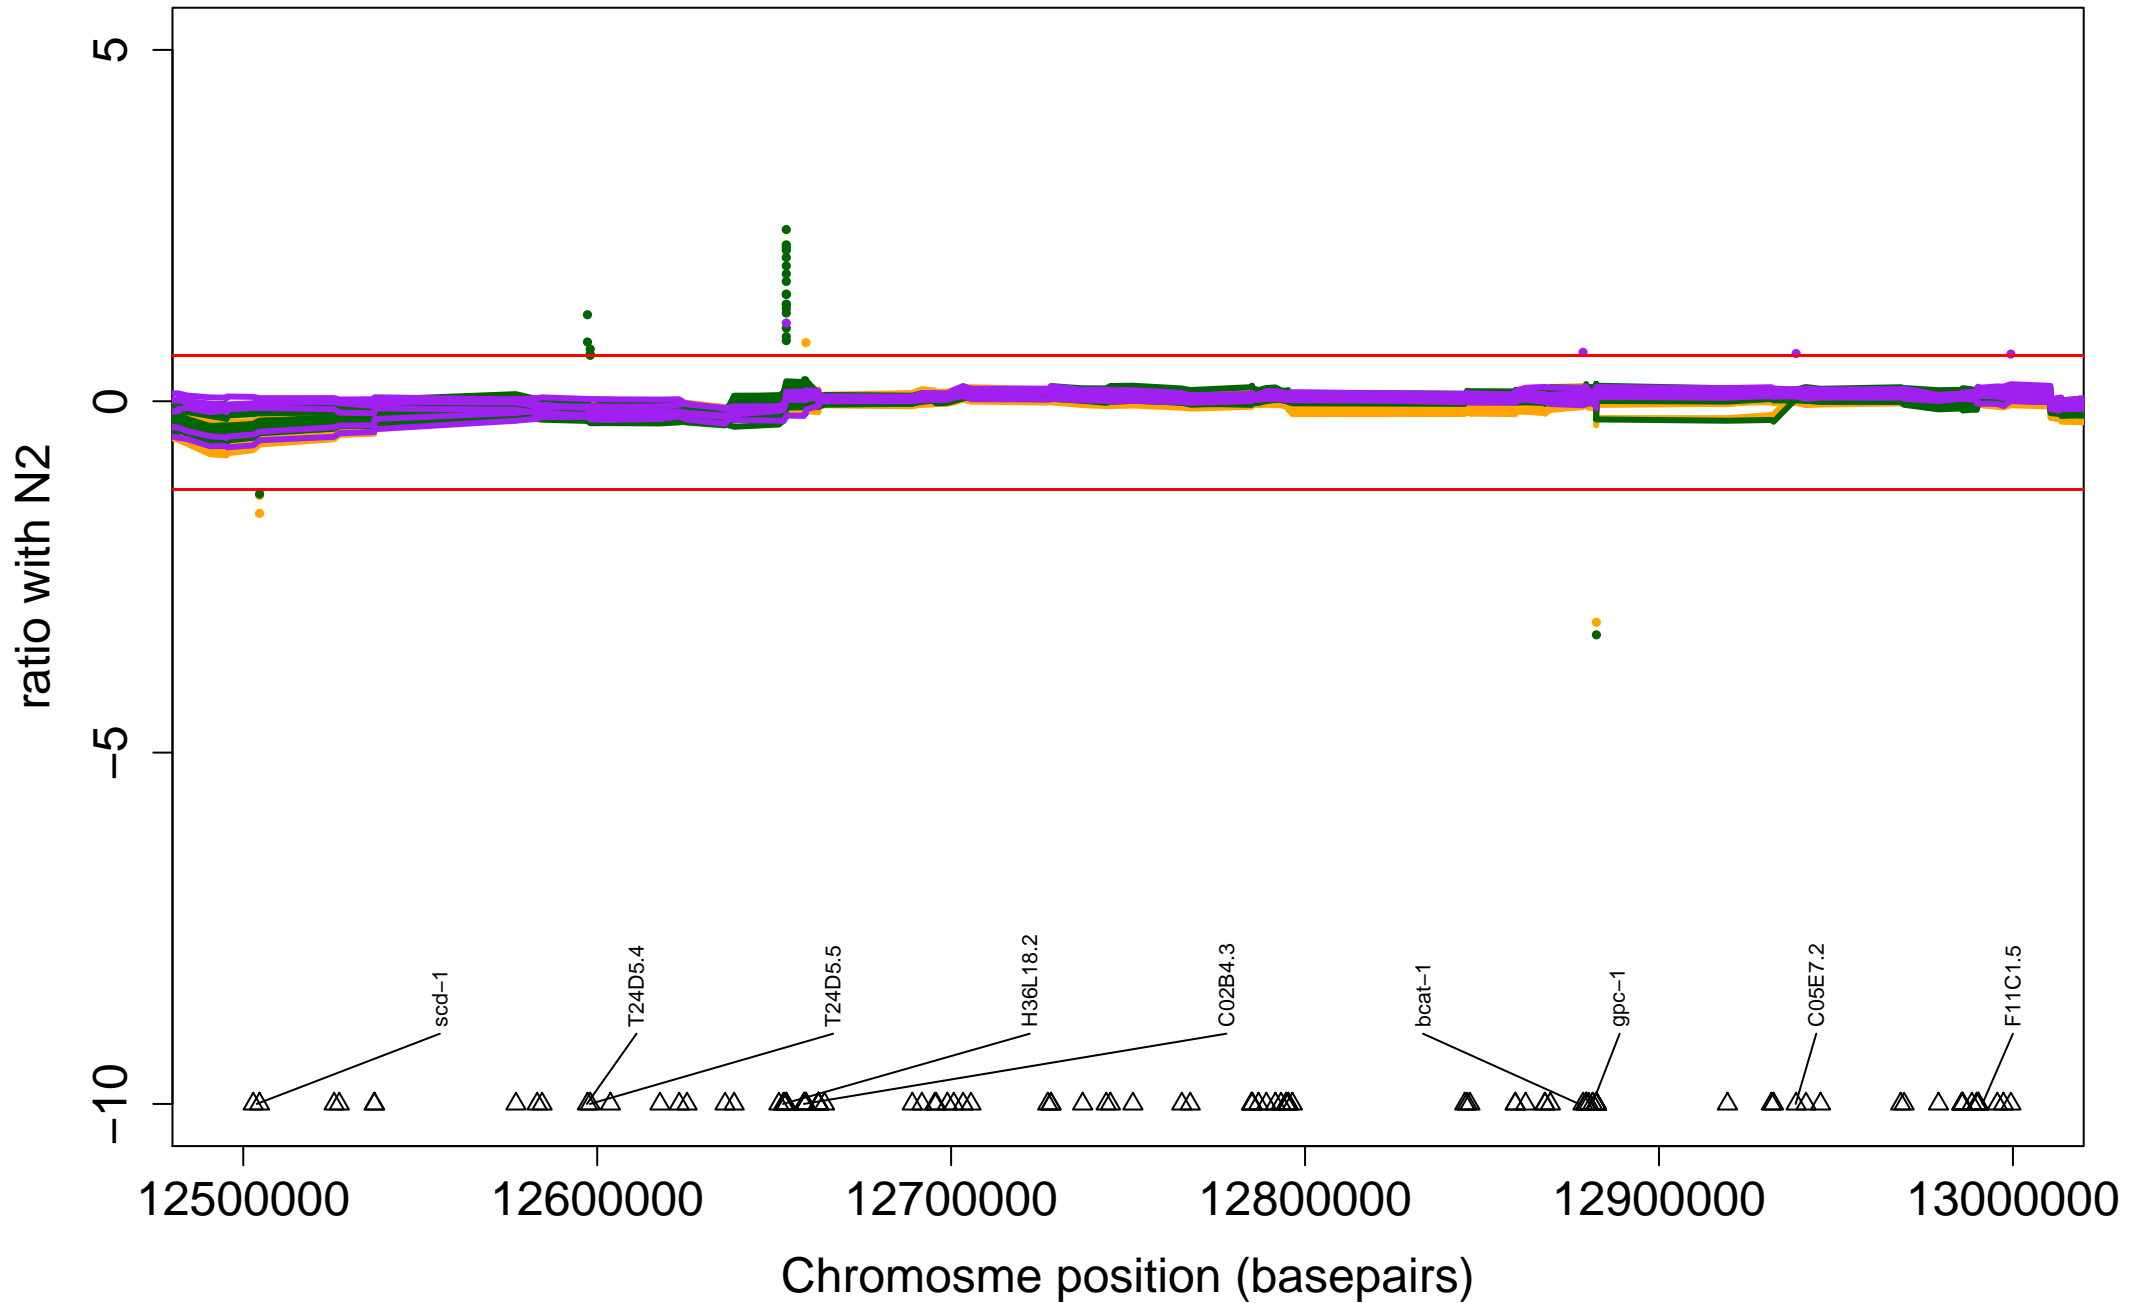



X

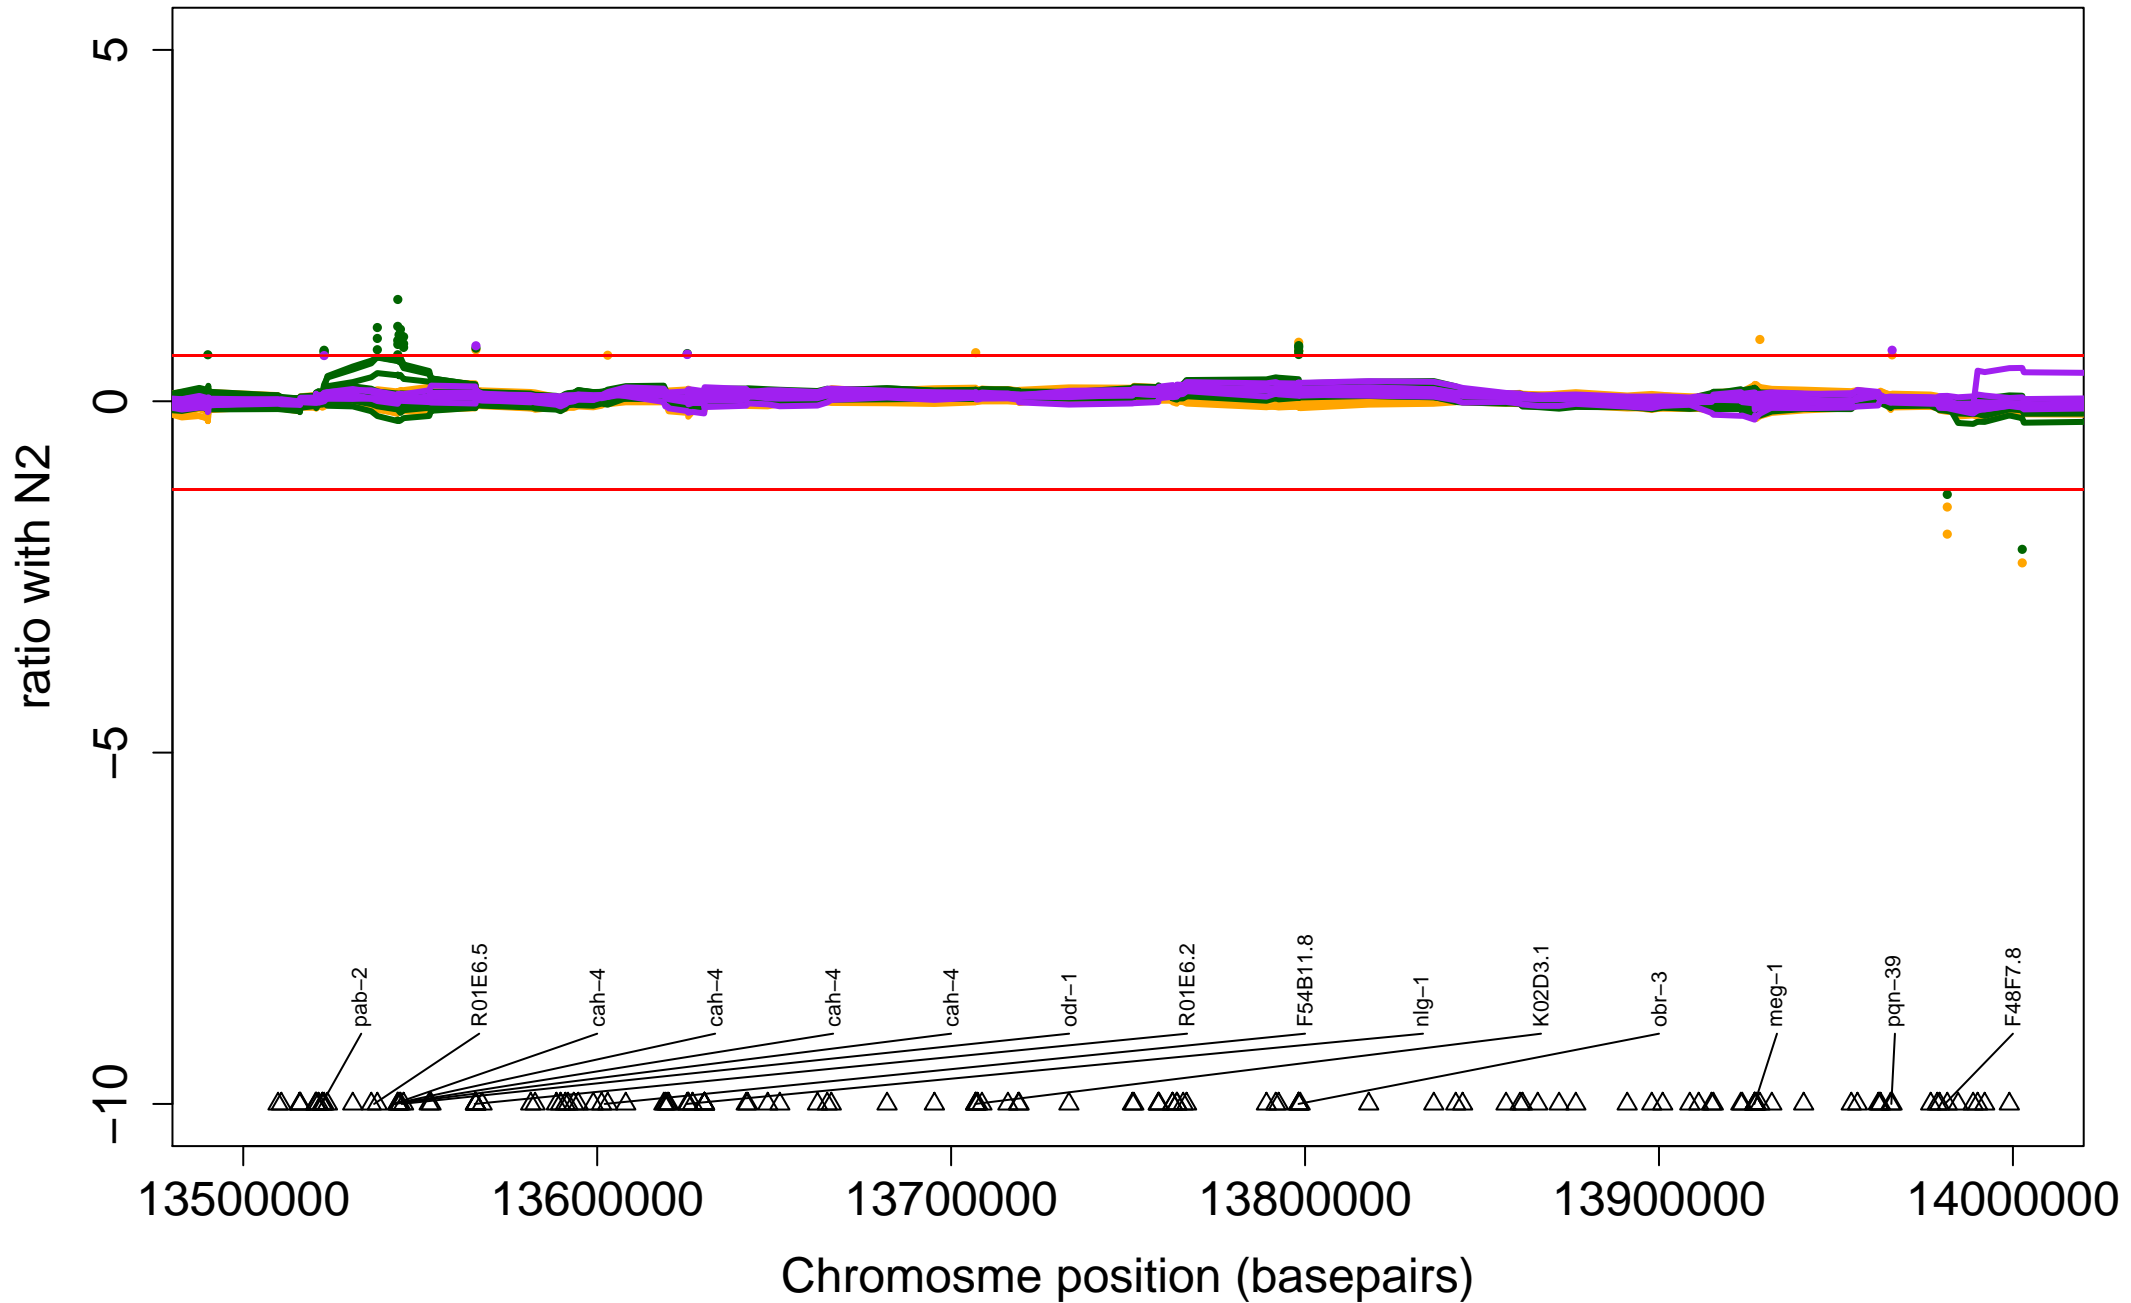

X

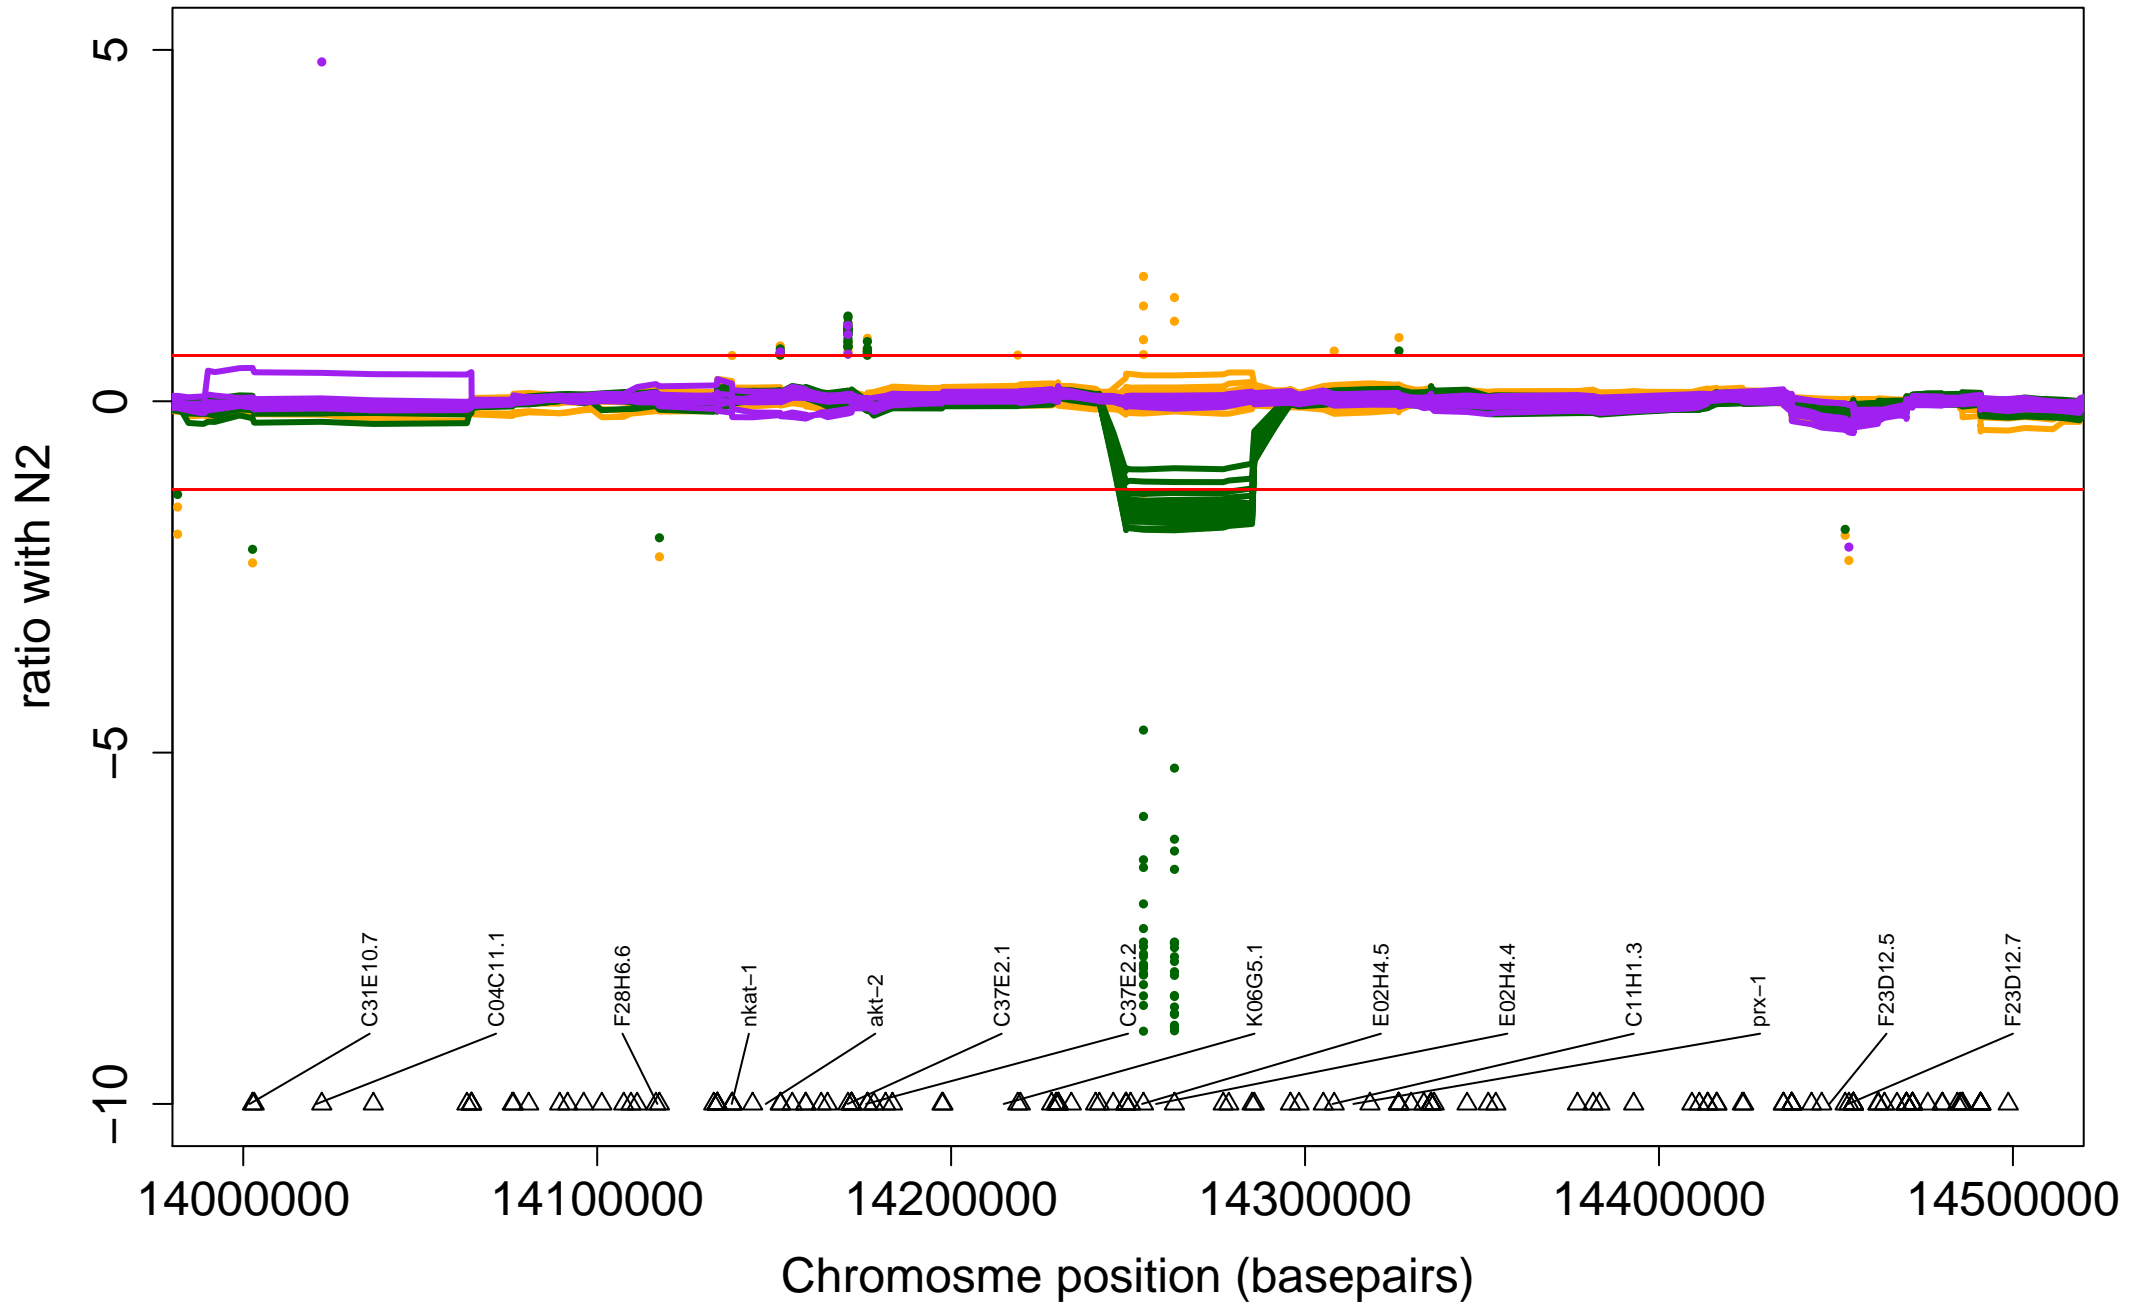



X

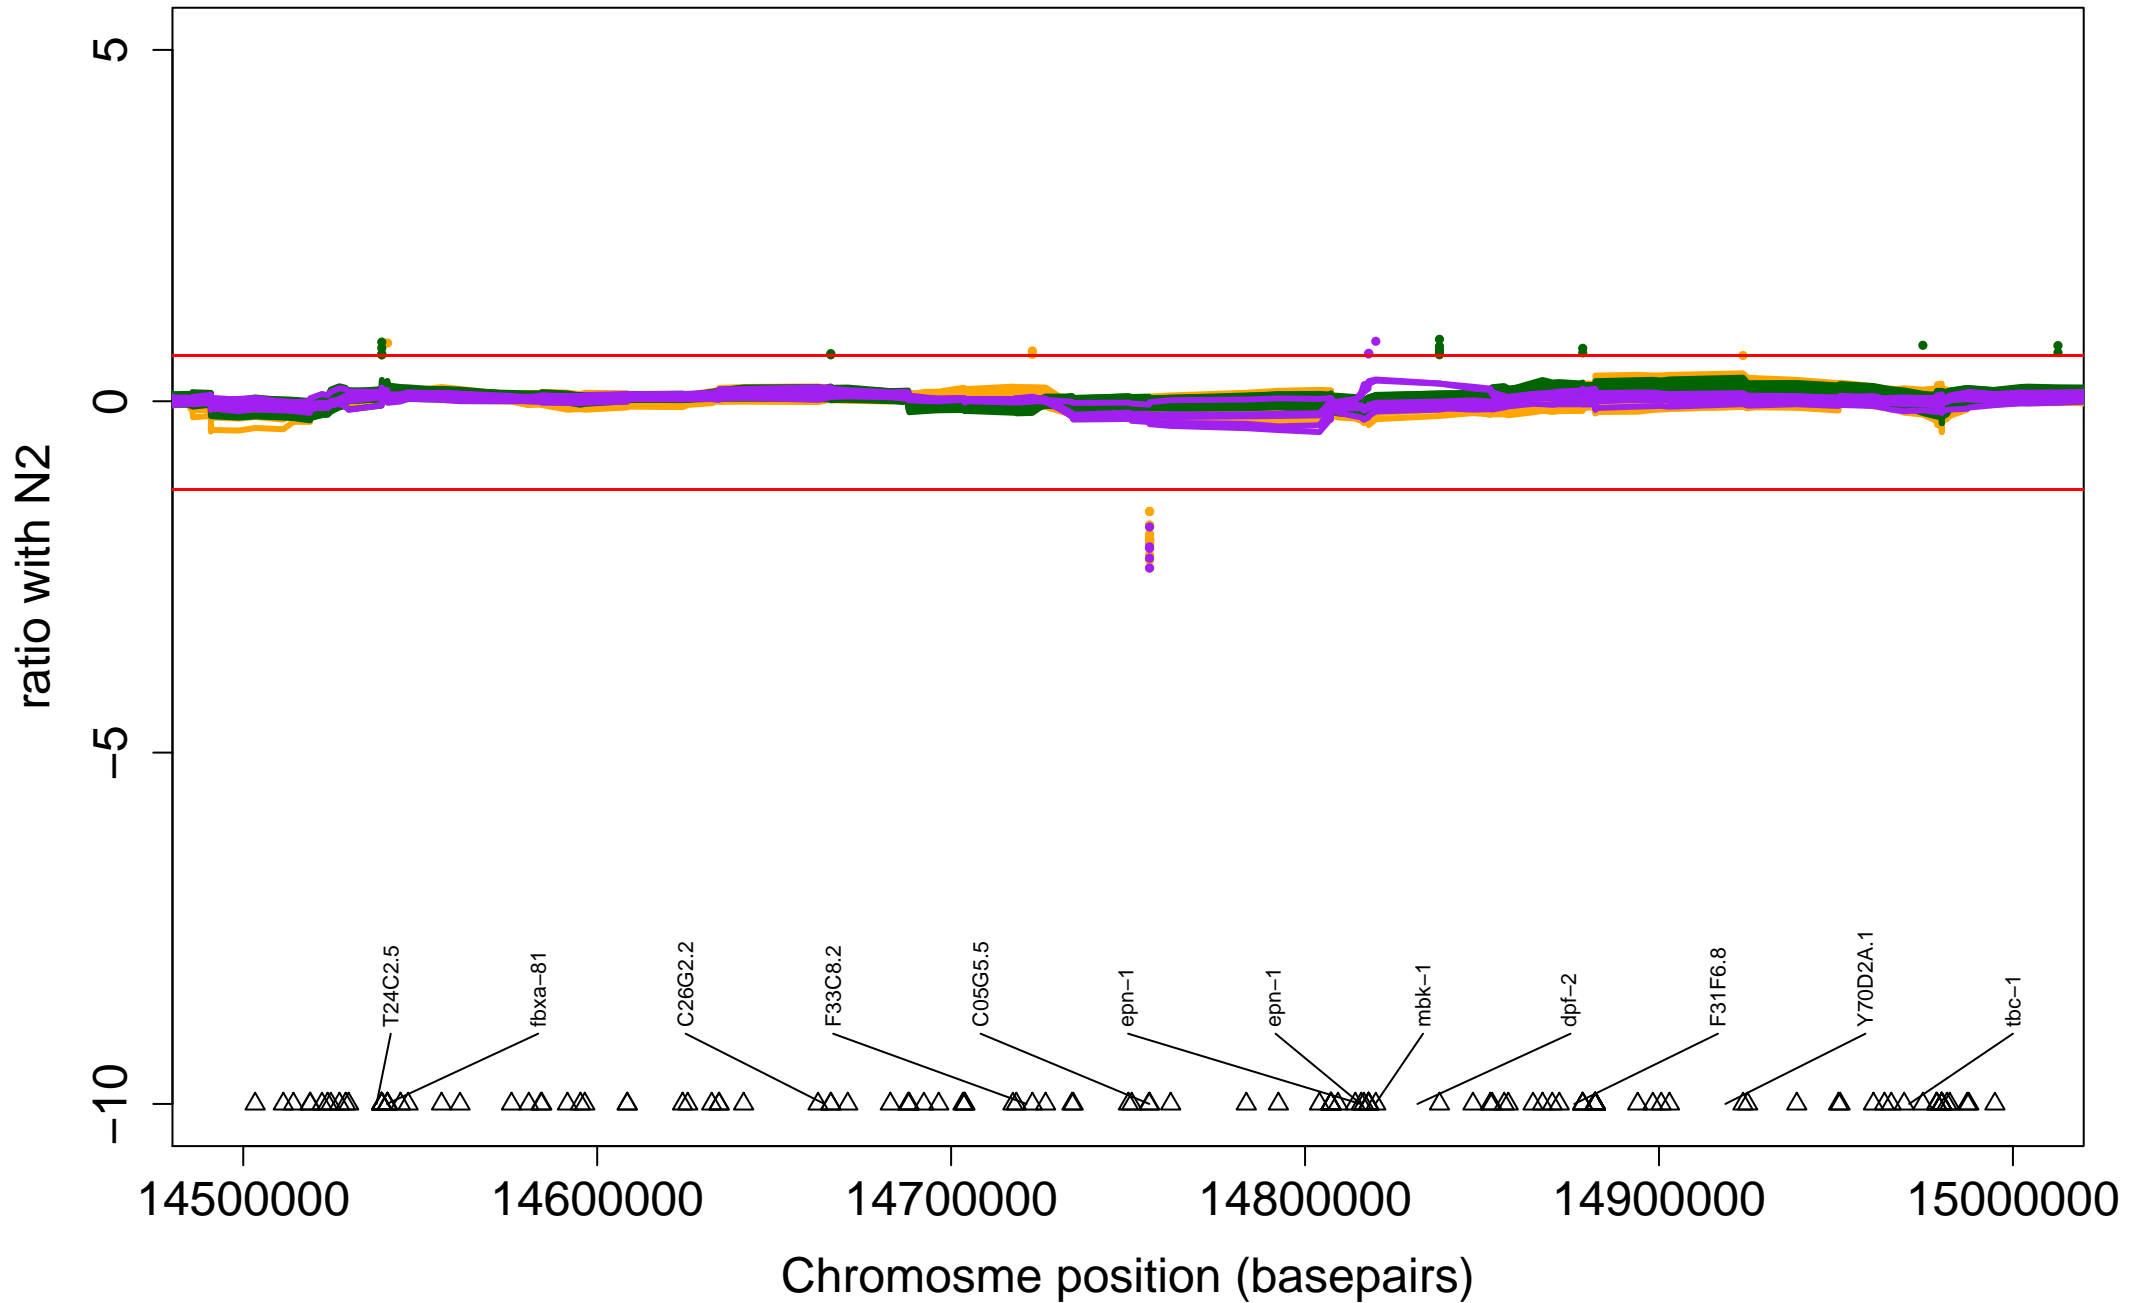

X

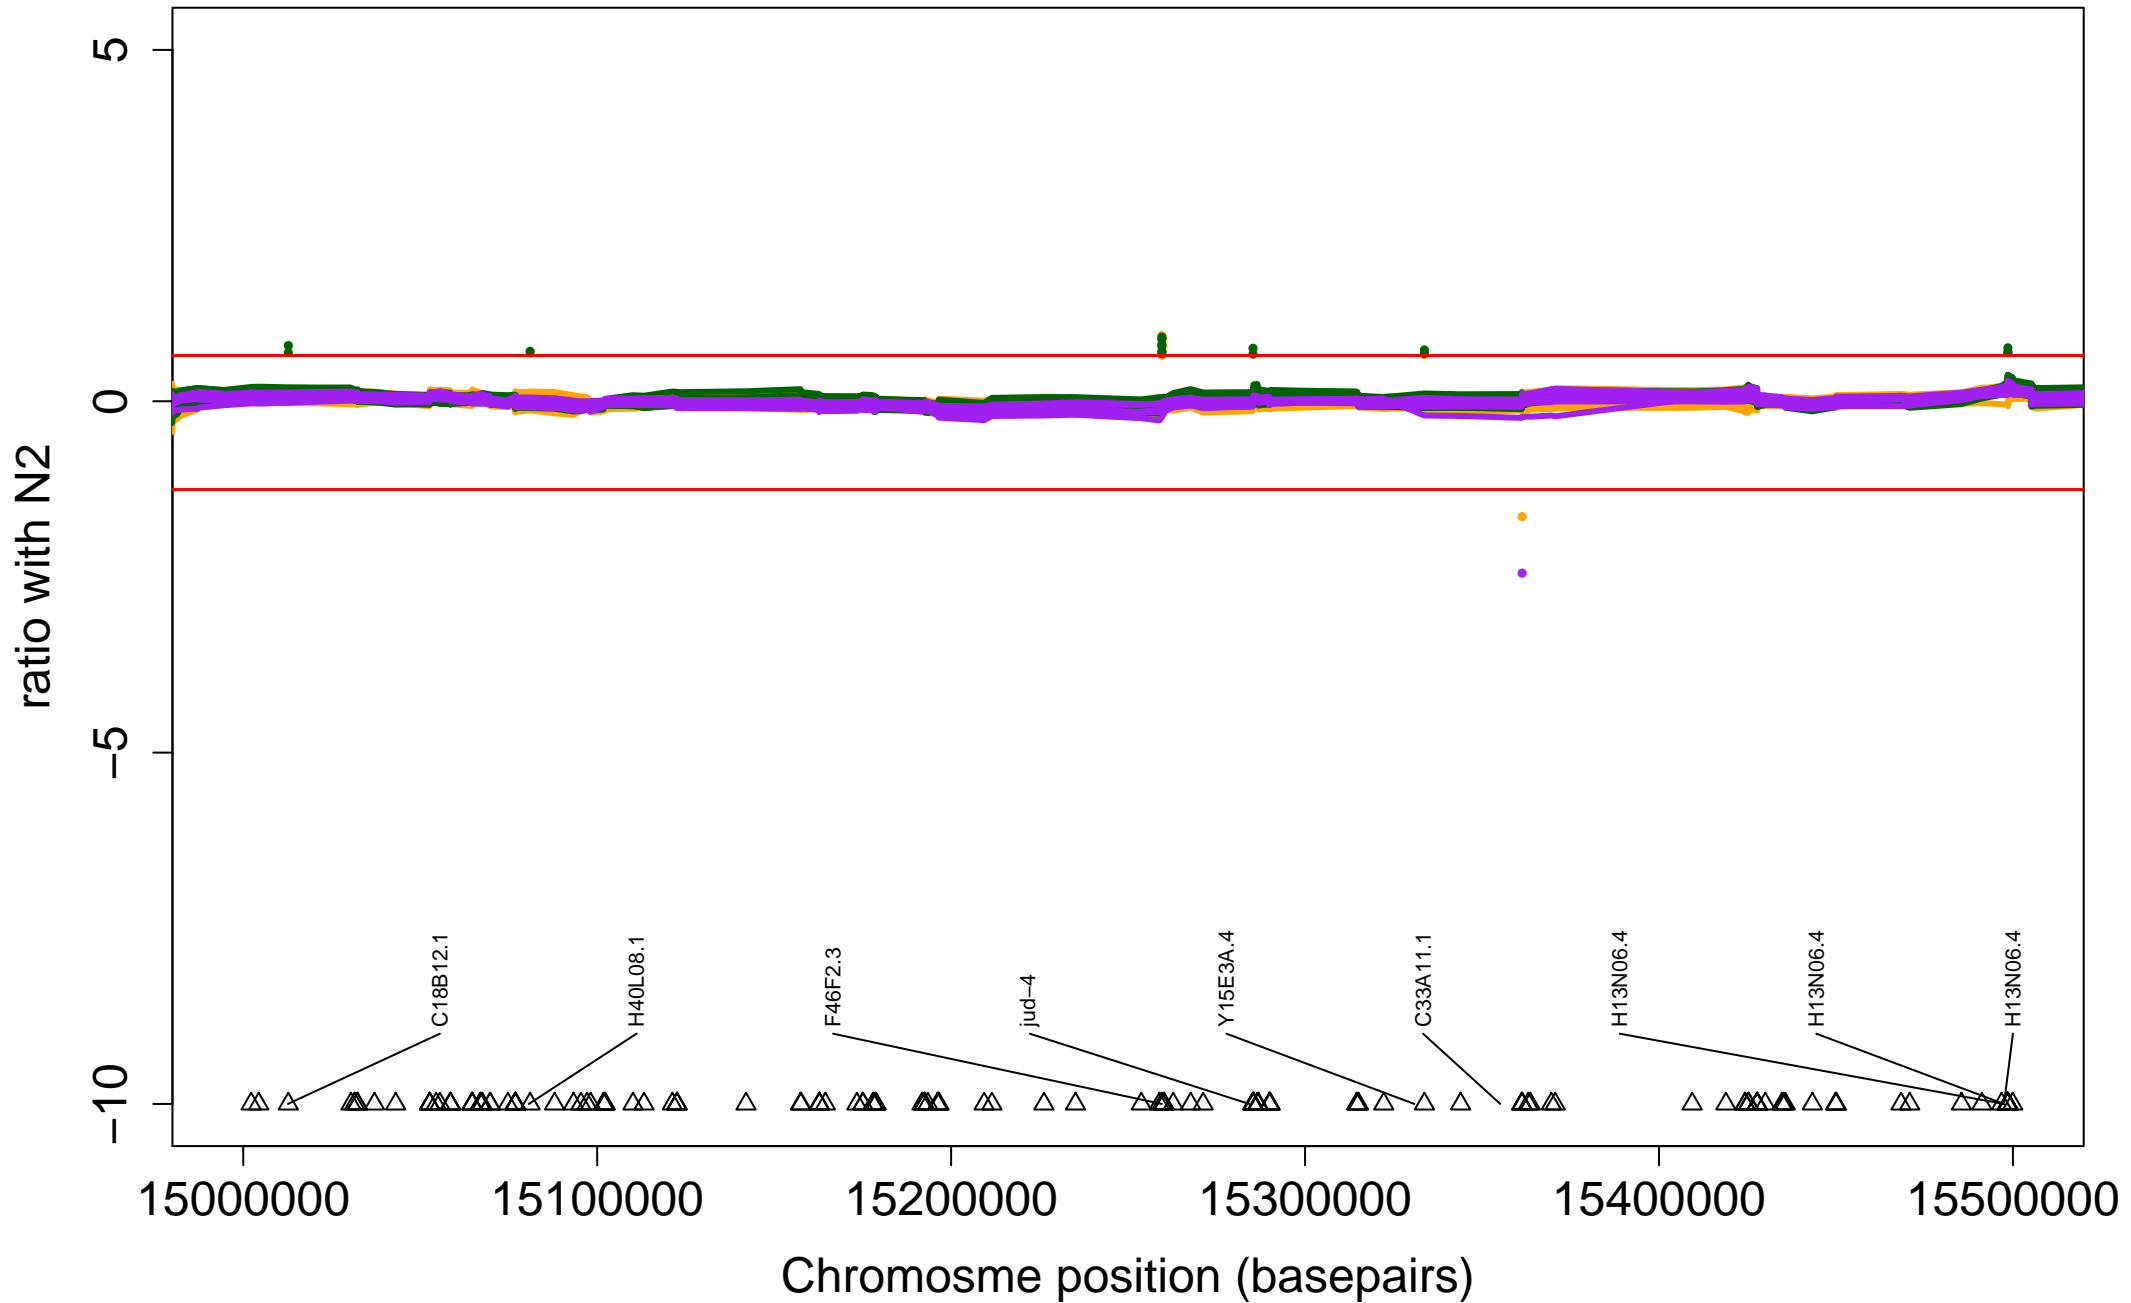

X

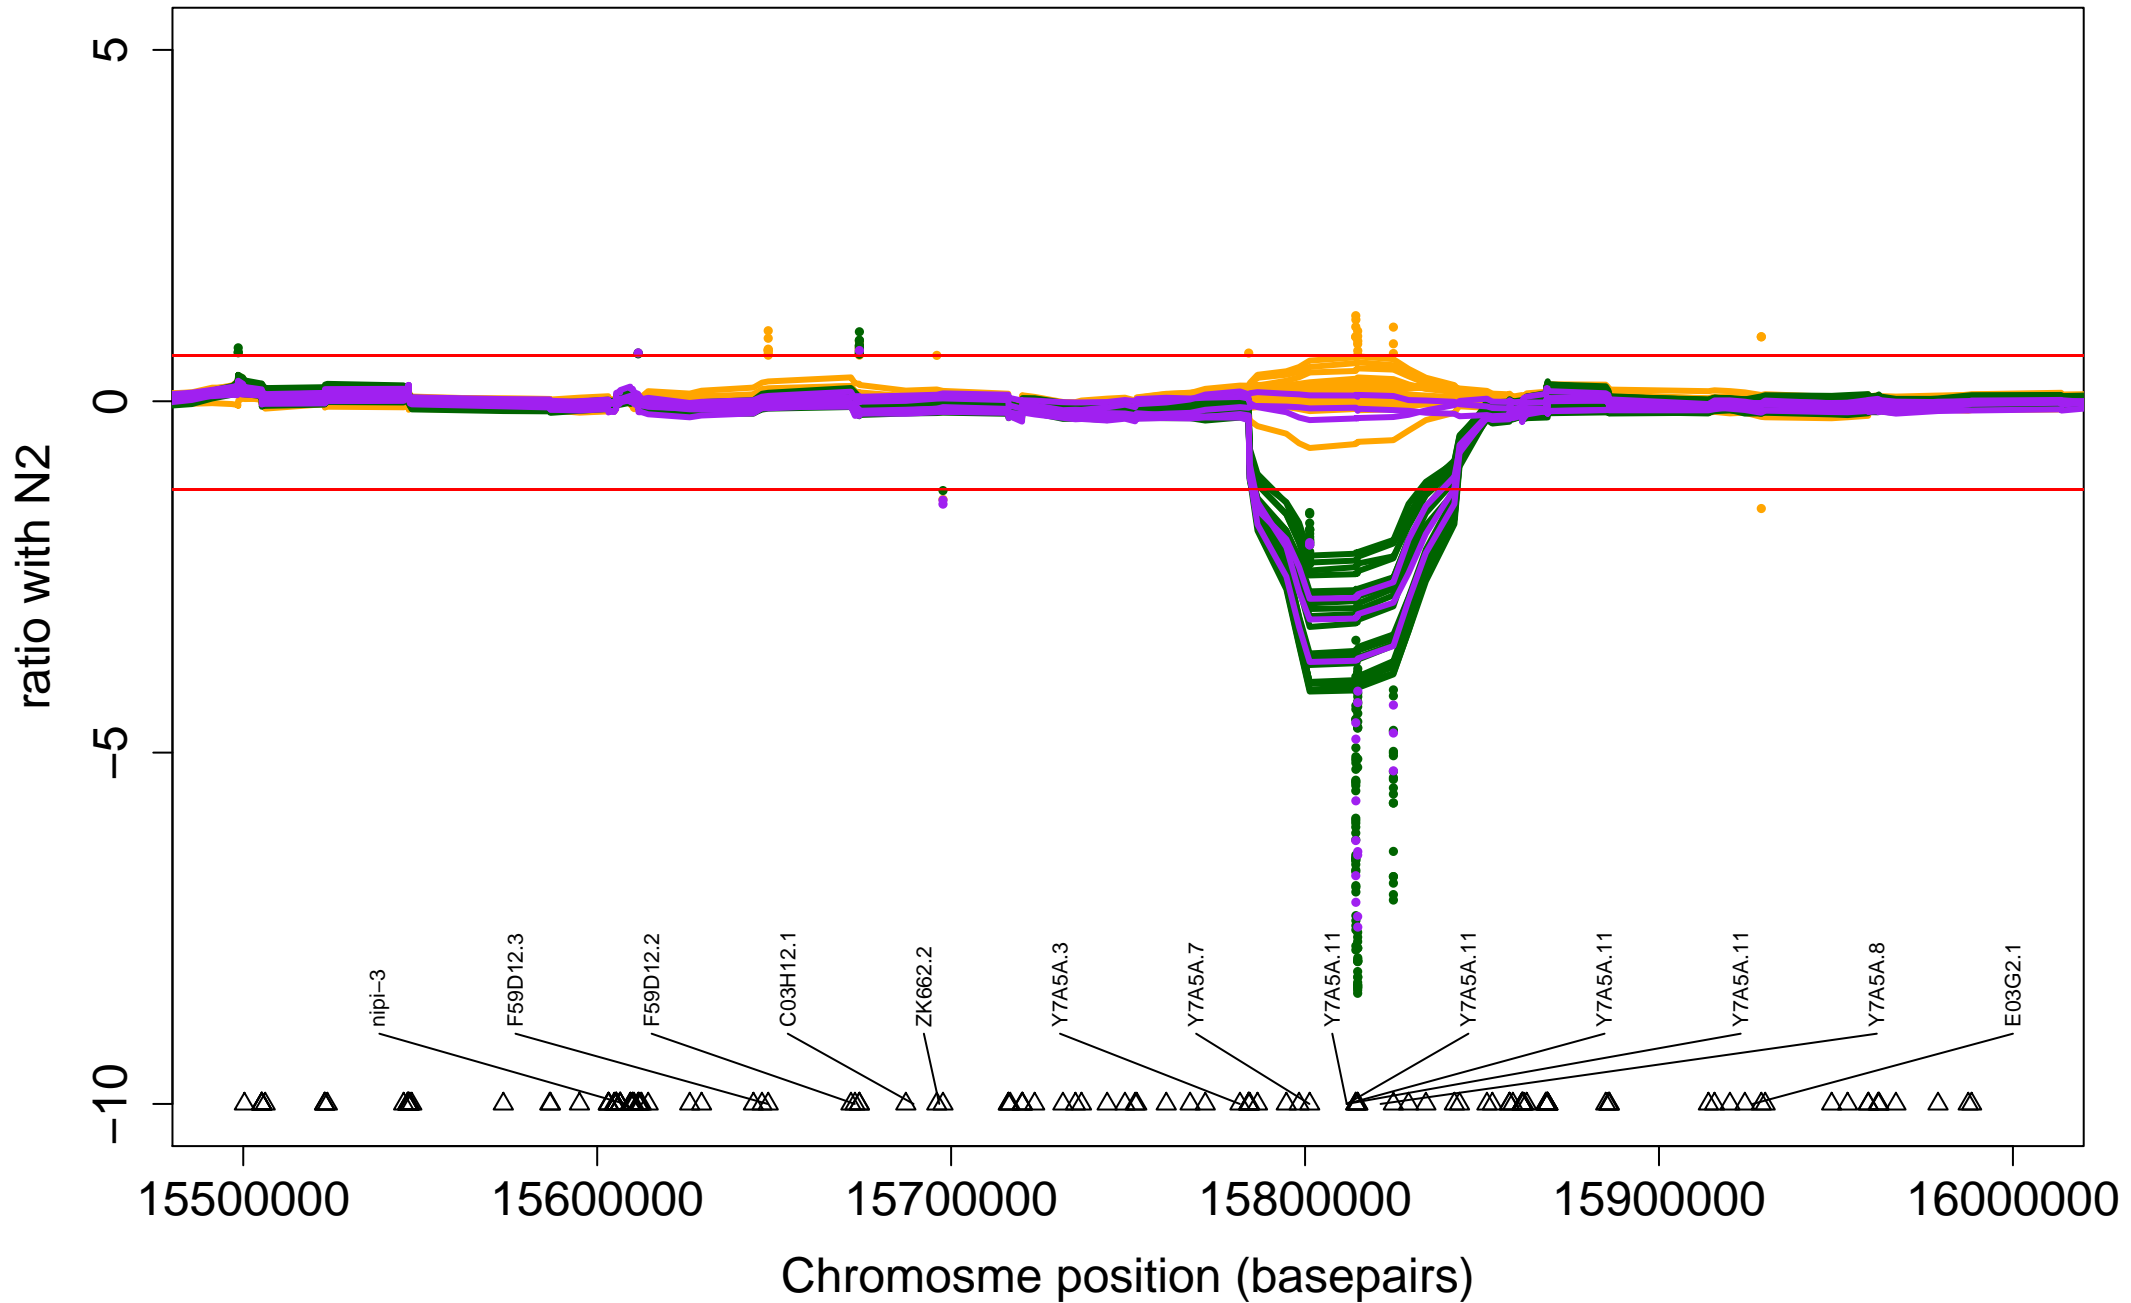

X

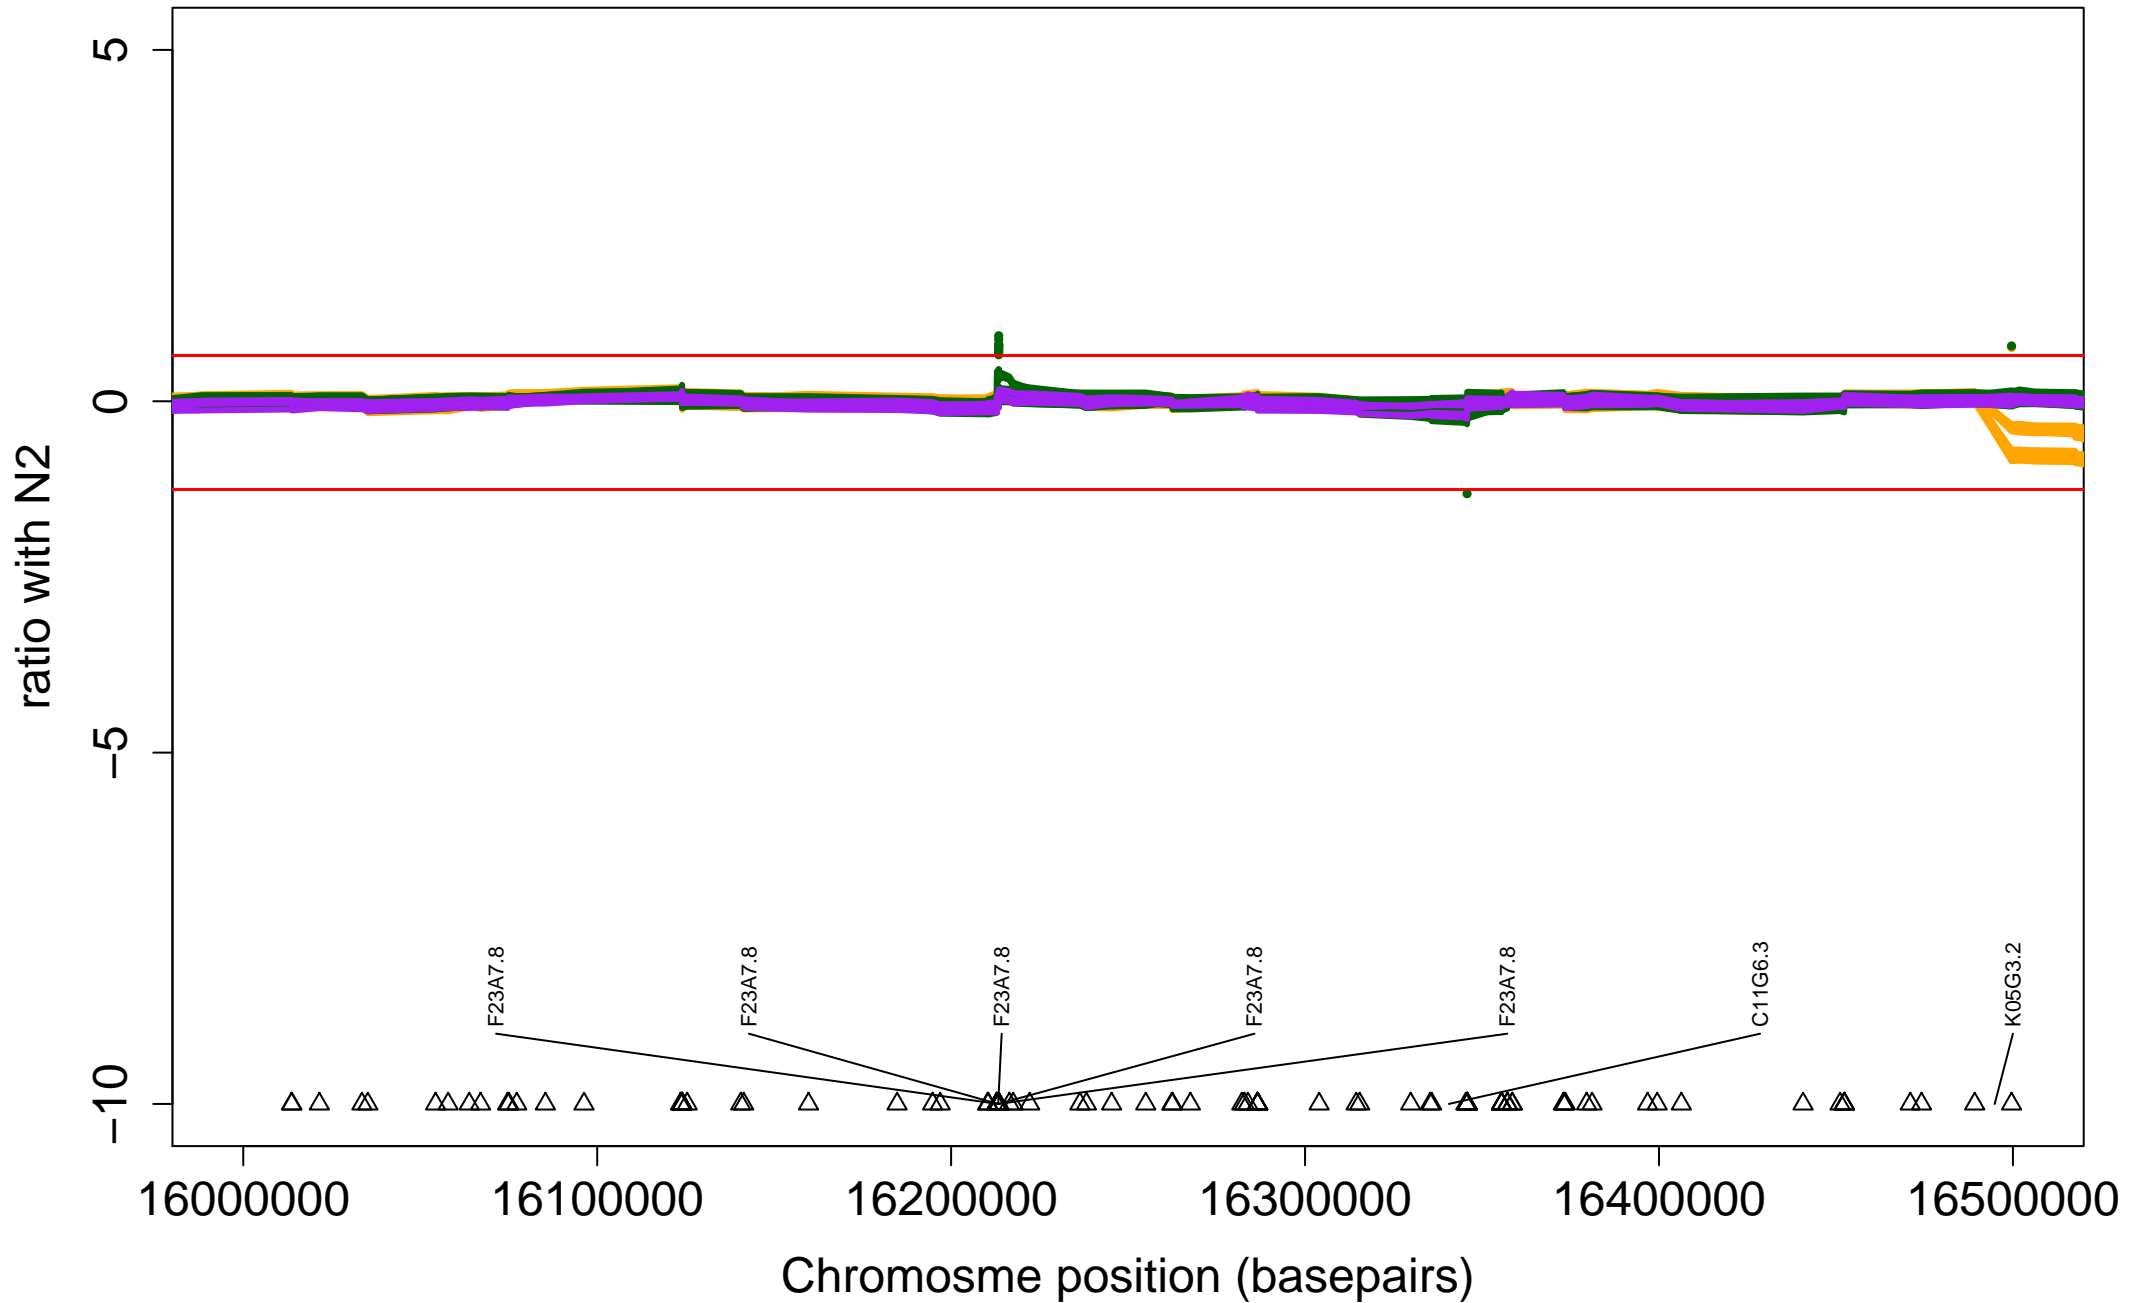

X

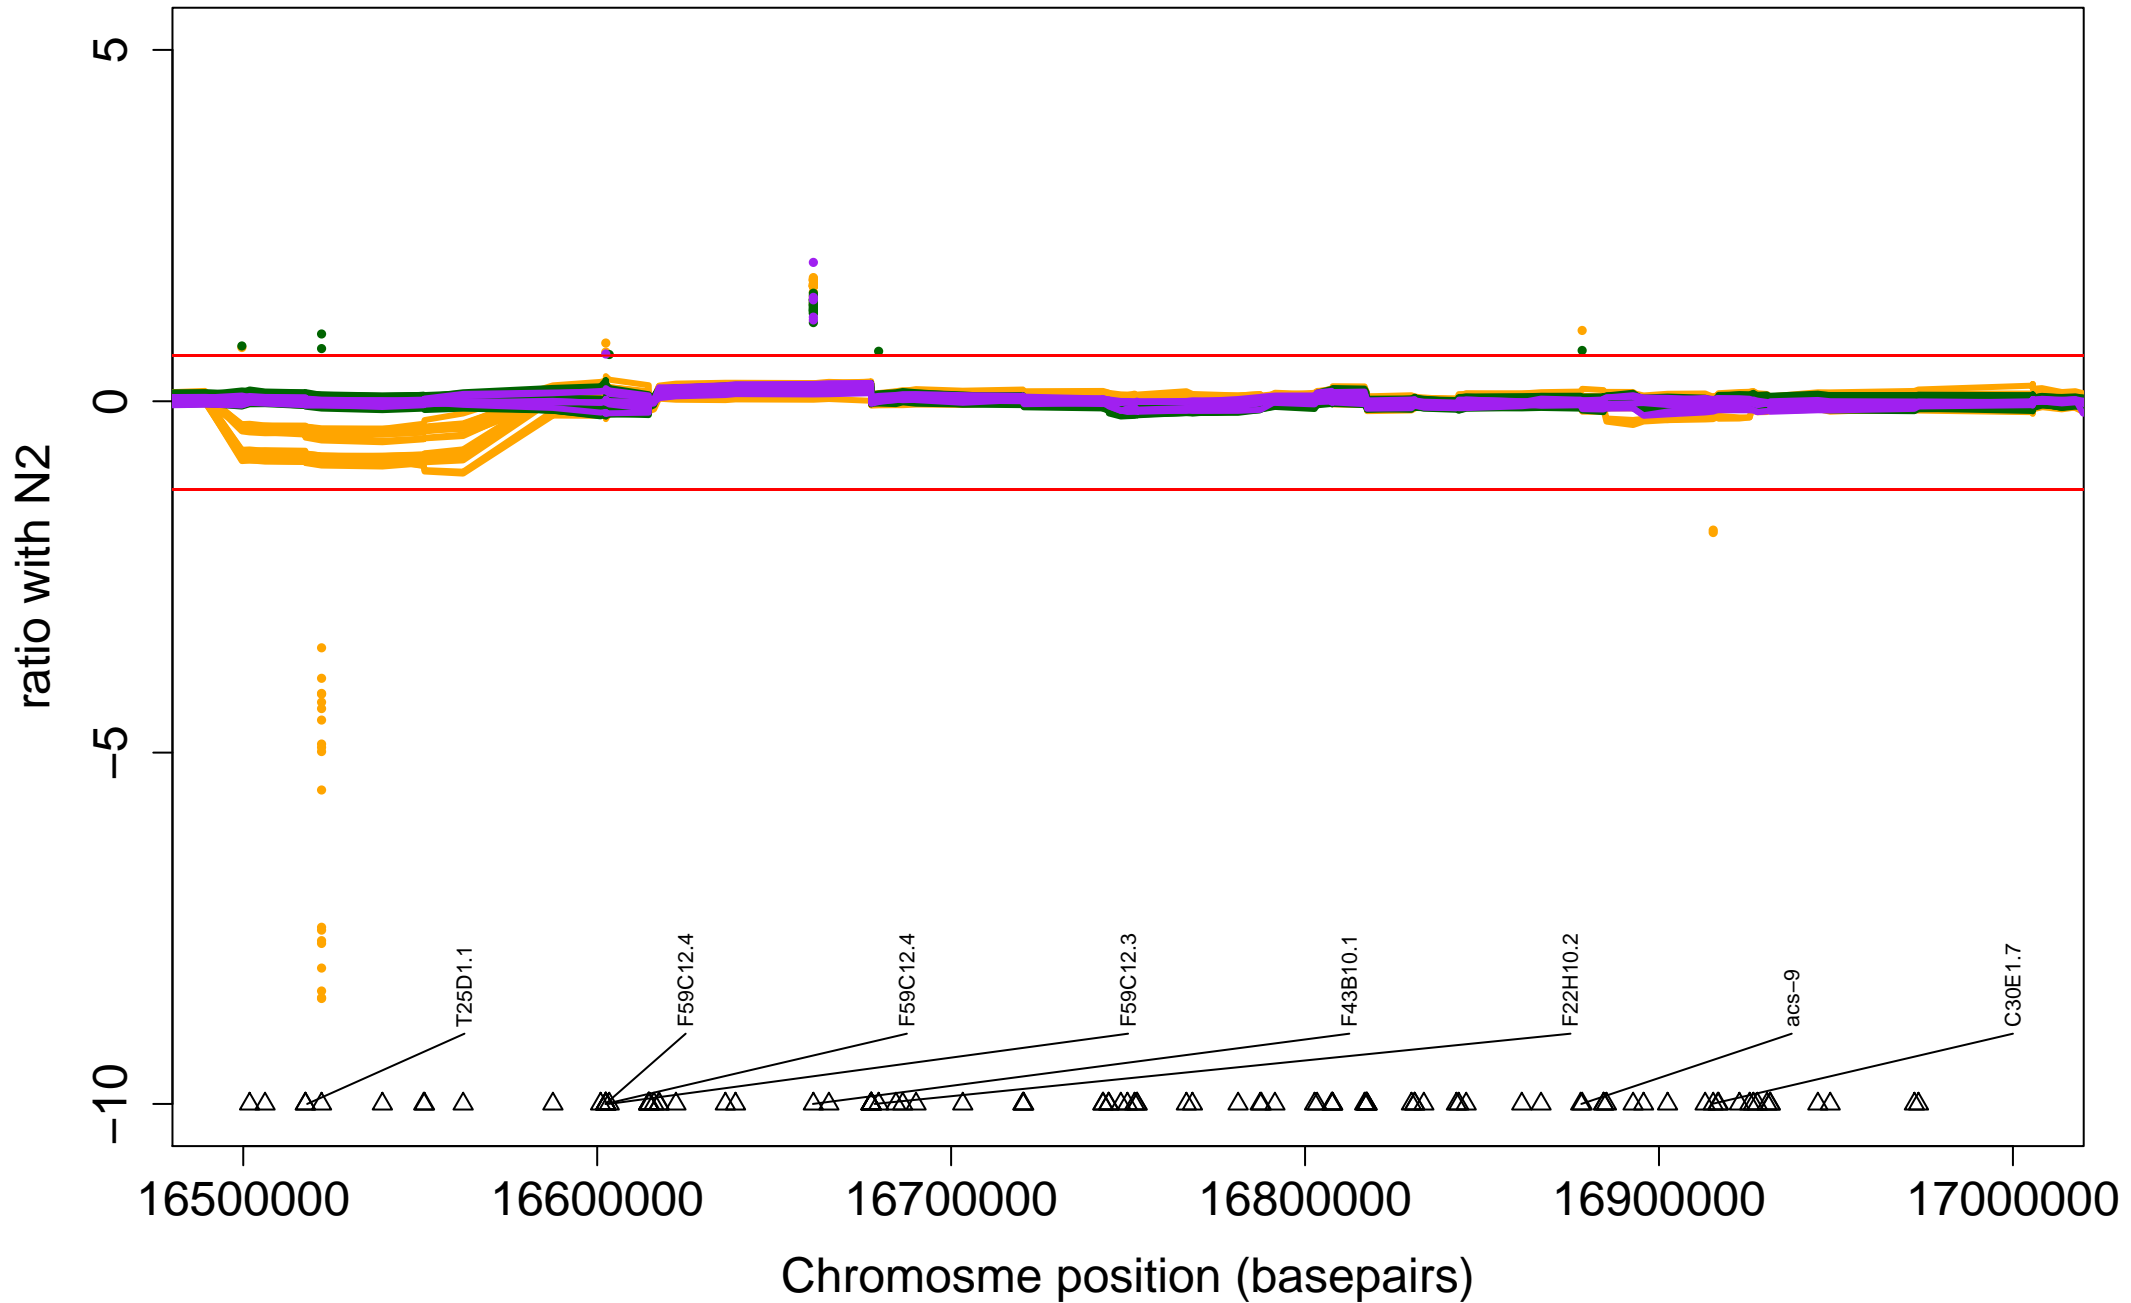

X

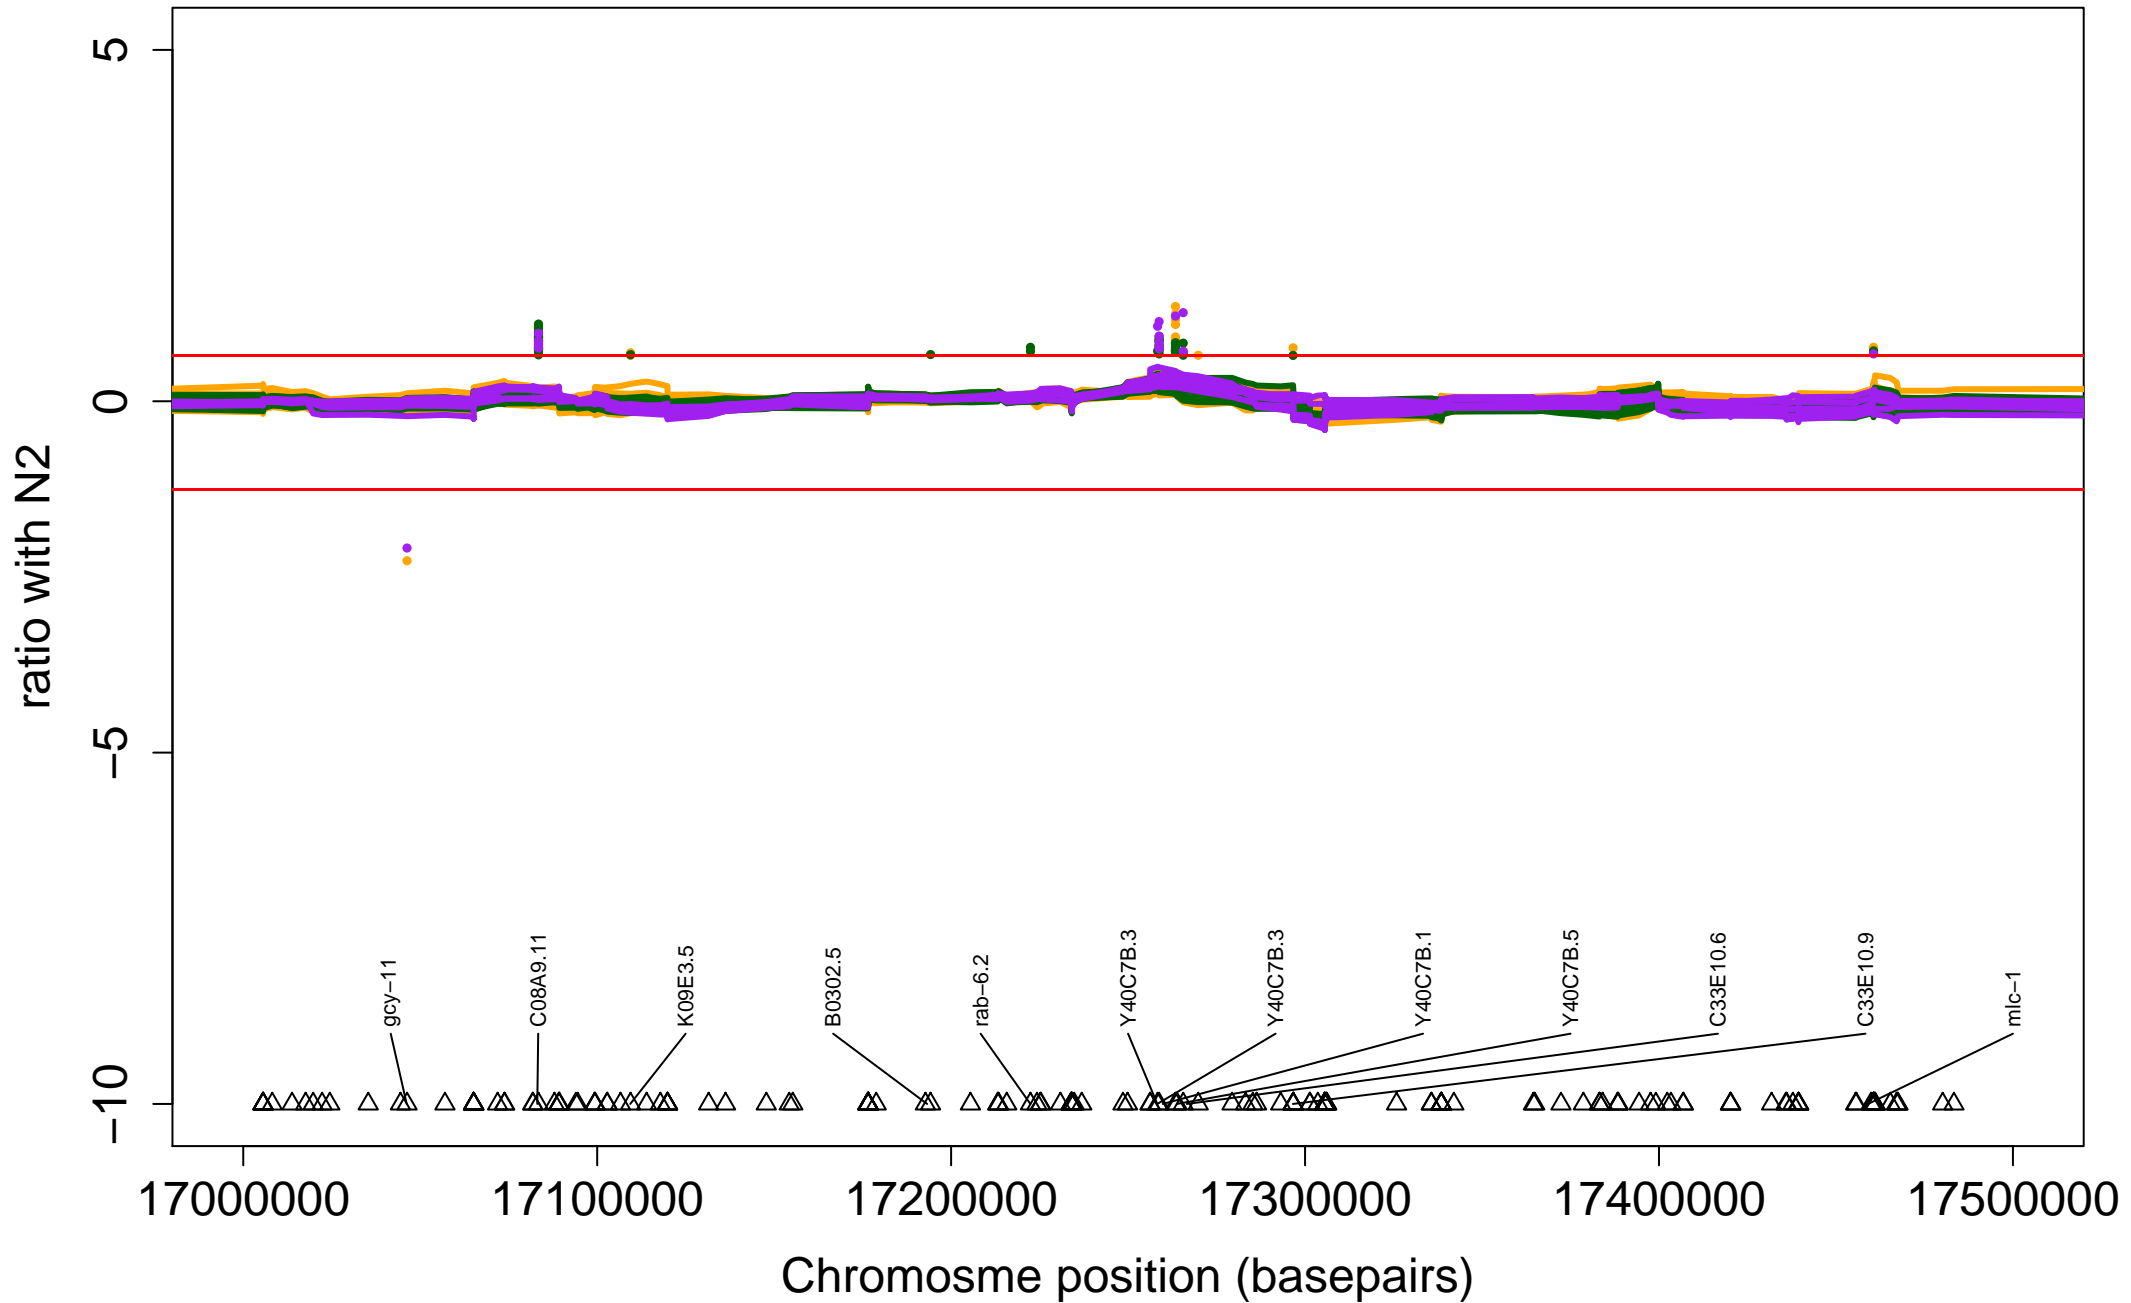

X

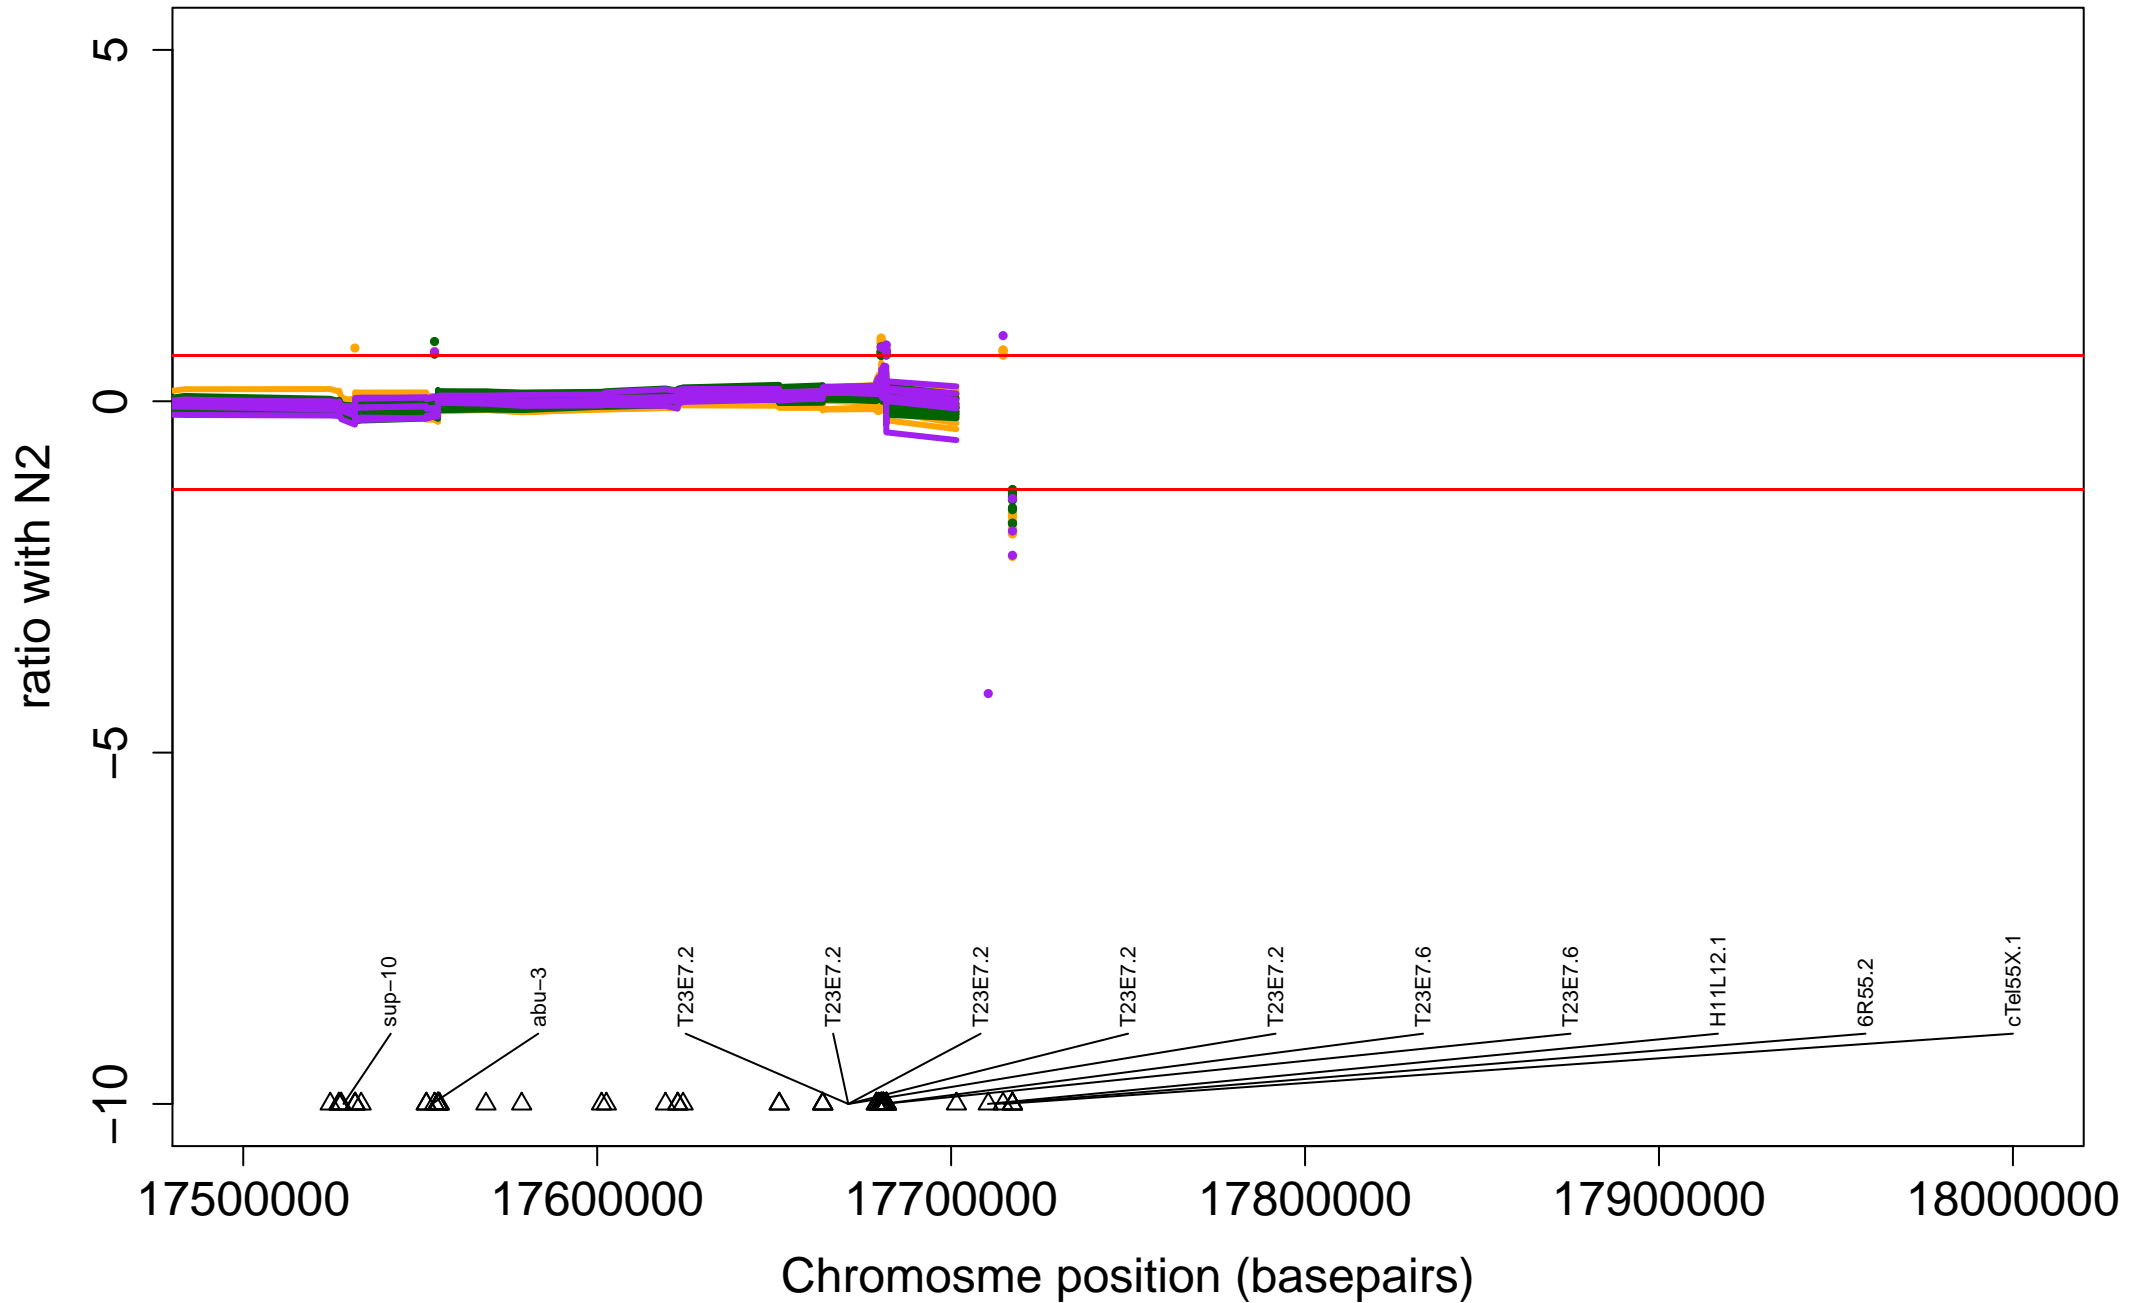

x

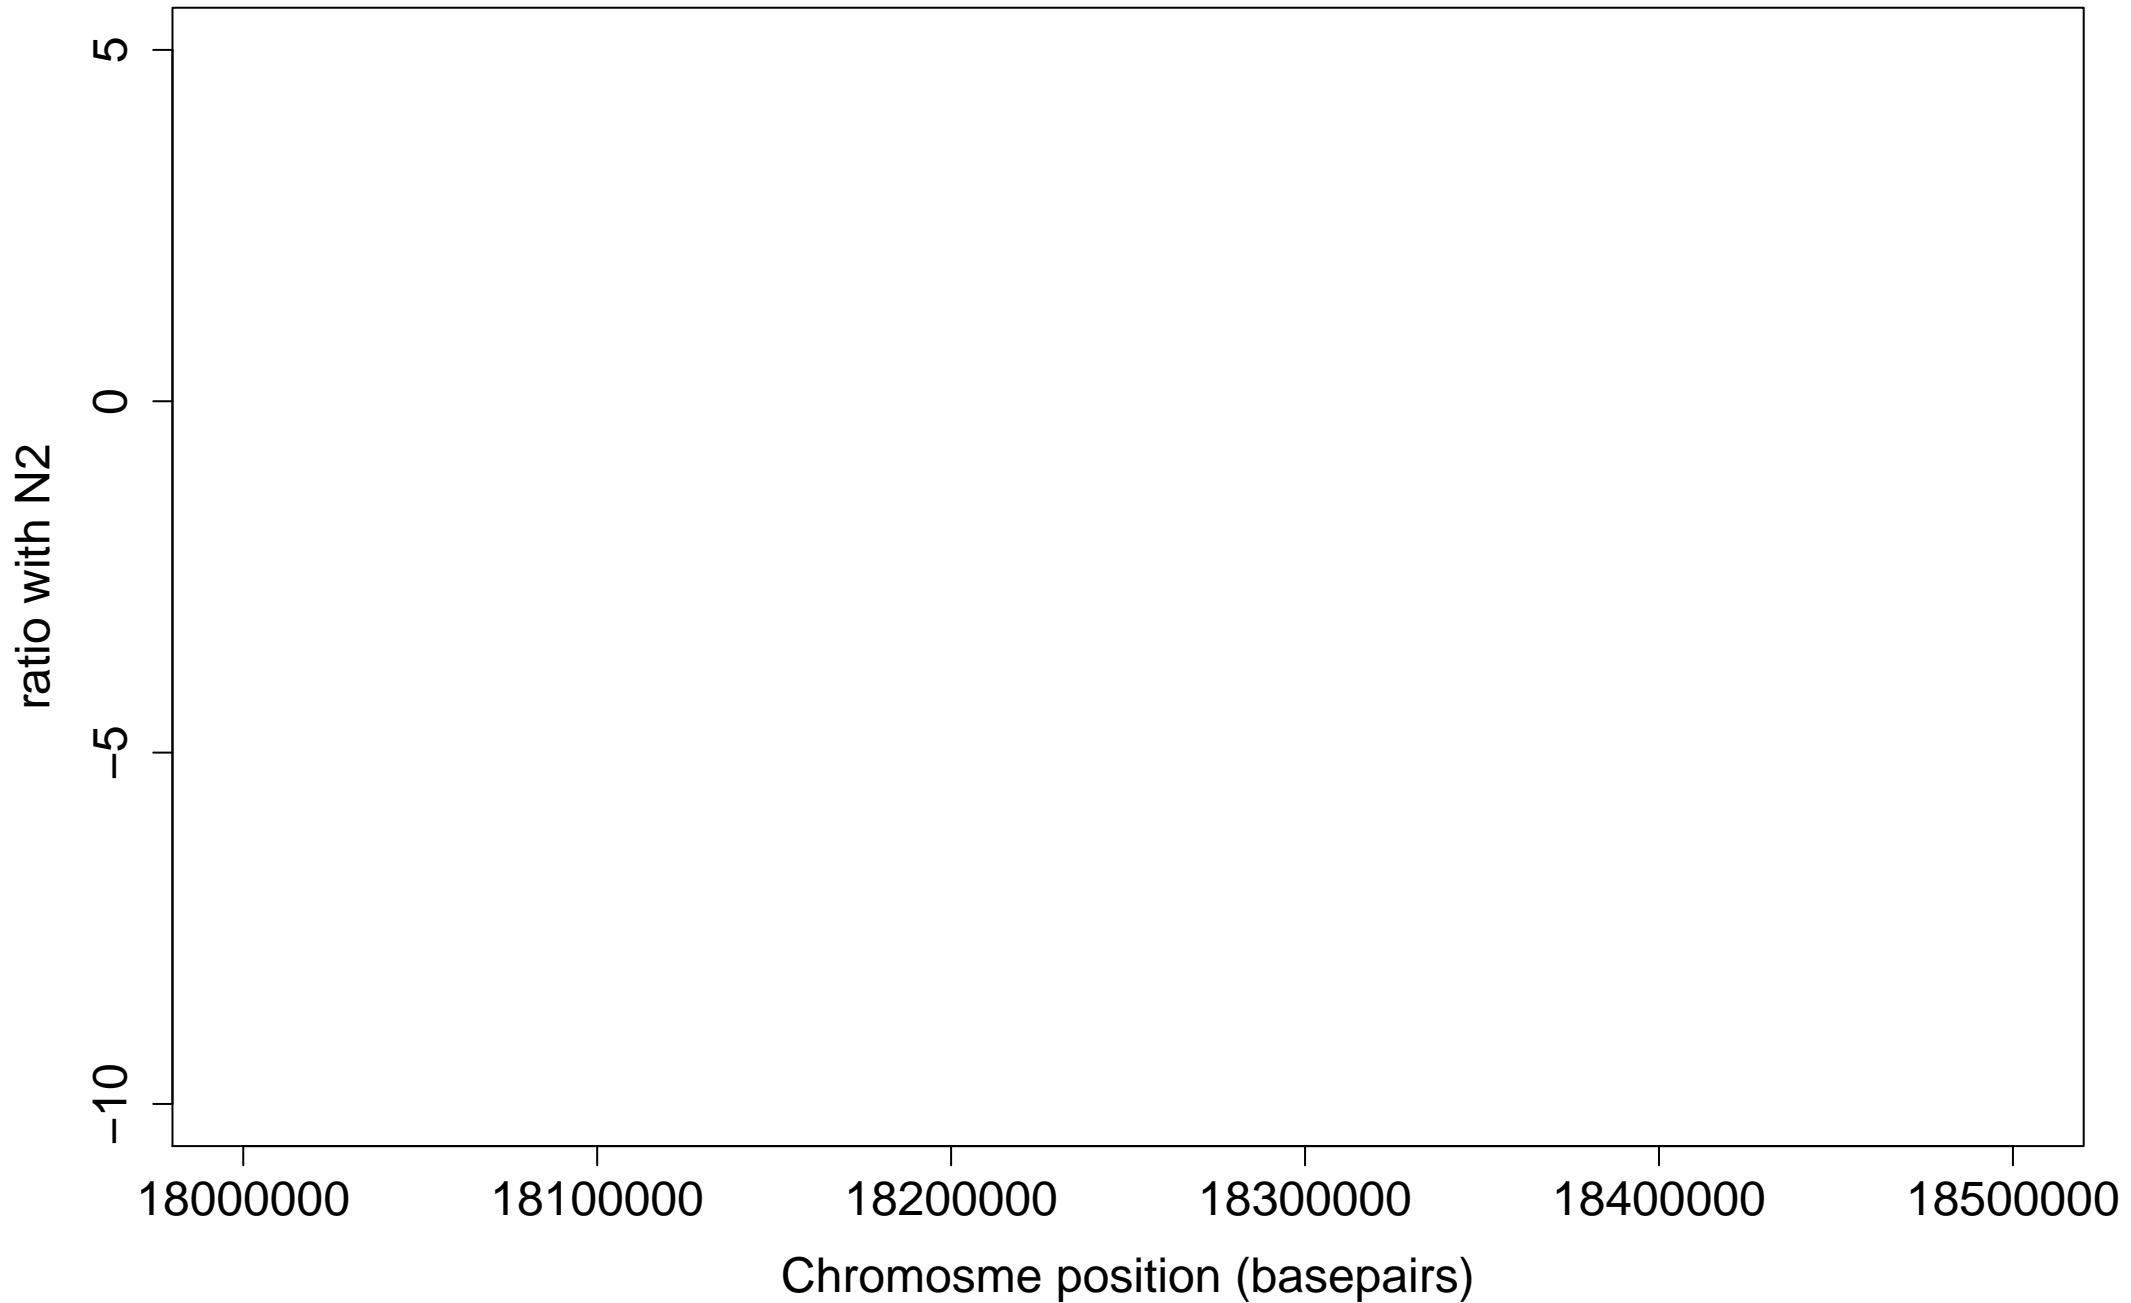

Supplement: 1741-7007-11-93-S2.pdf [file 1741-7007-11-93-S2.pdf]
