# Supplementary material for: Gene-environment and protein-degradation signatures characterize genomic and phenotypic diversity in wild Caenorhabditis elegans populations
Source: PubMed Central journal article supplement (PMC3846632; doi:10.1186/1741-7007-11-93), 2013-08-19

I

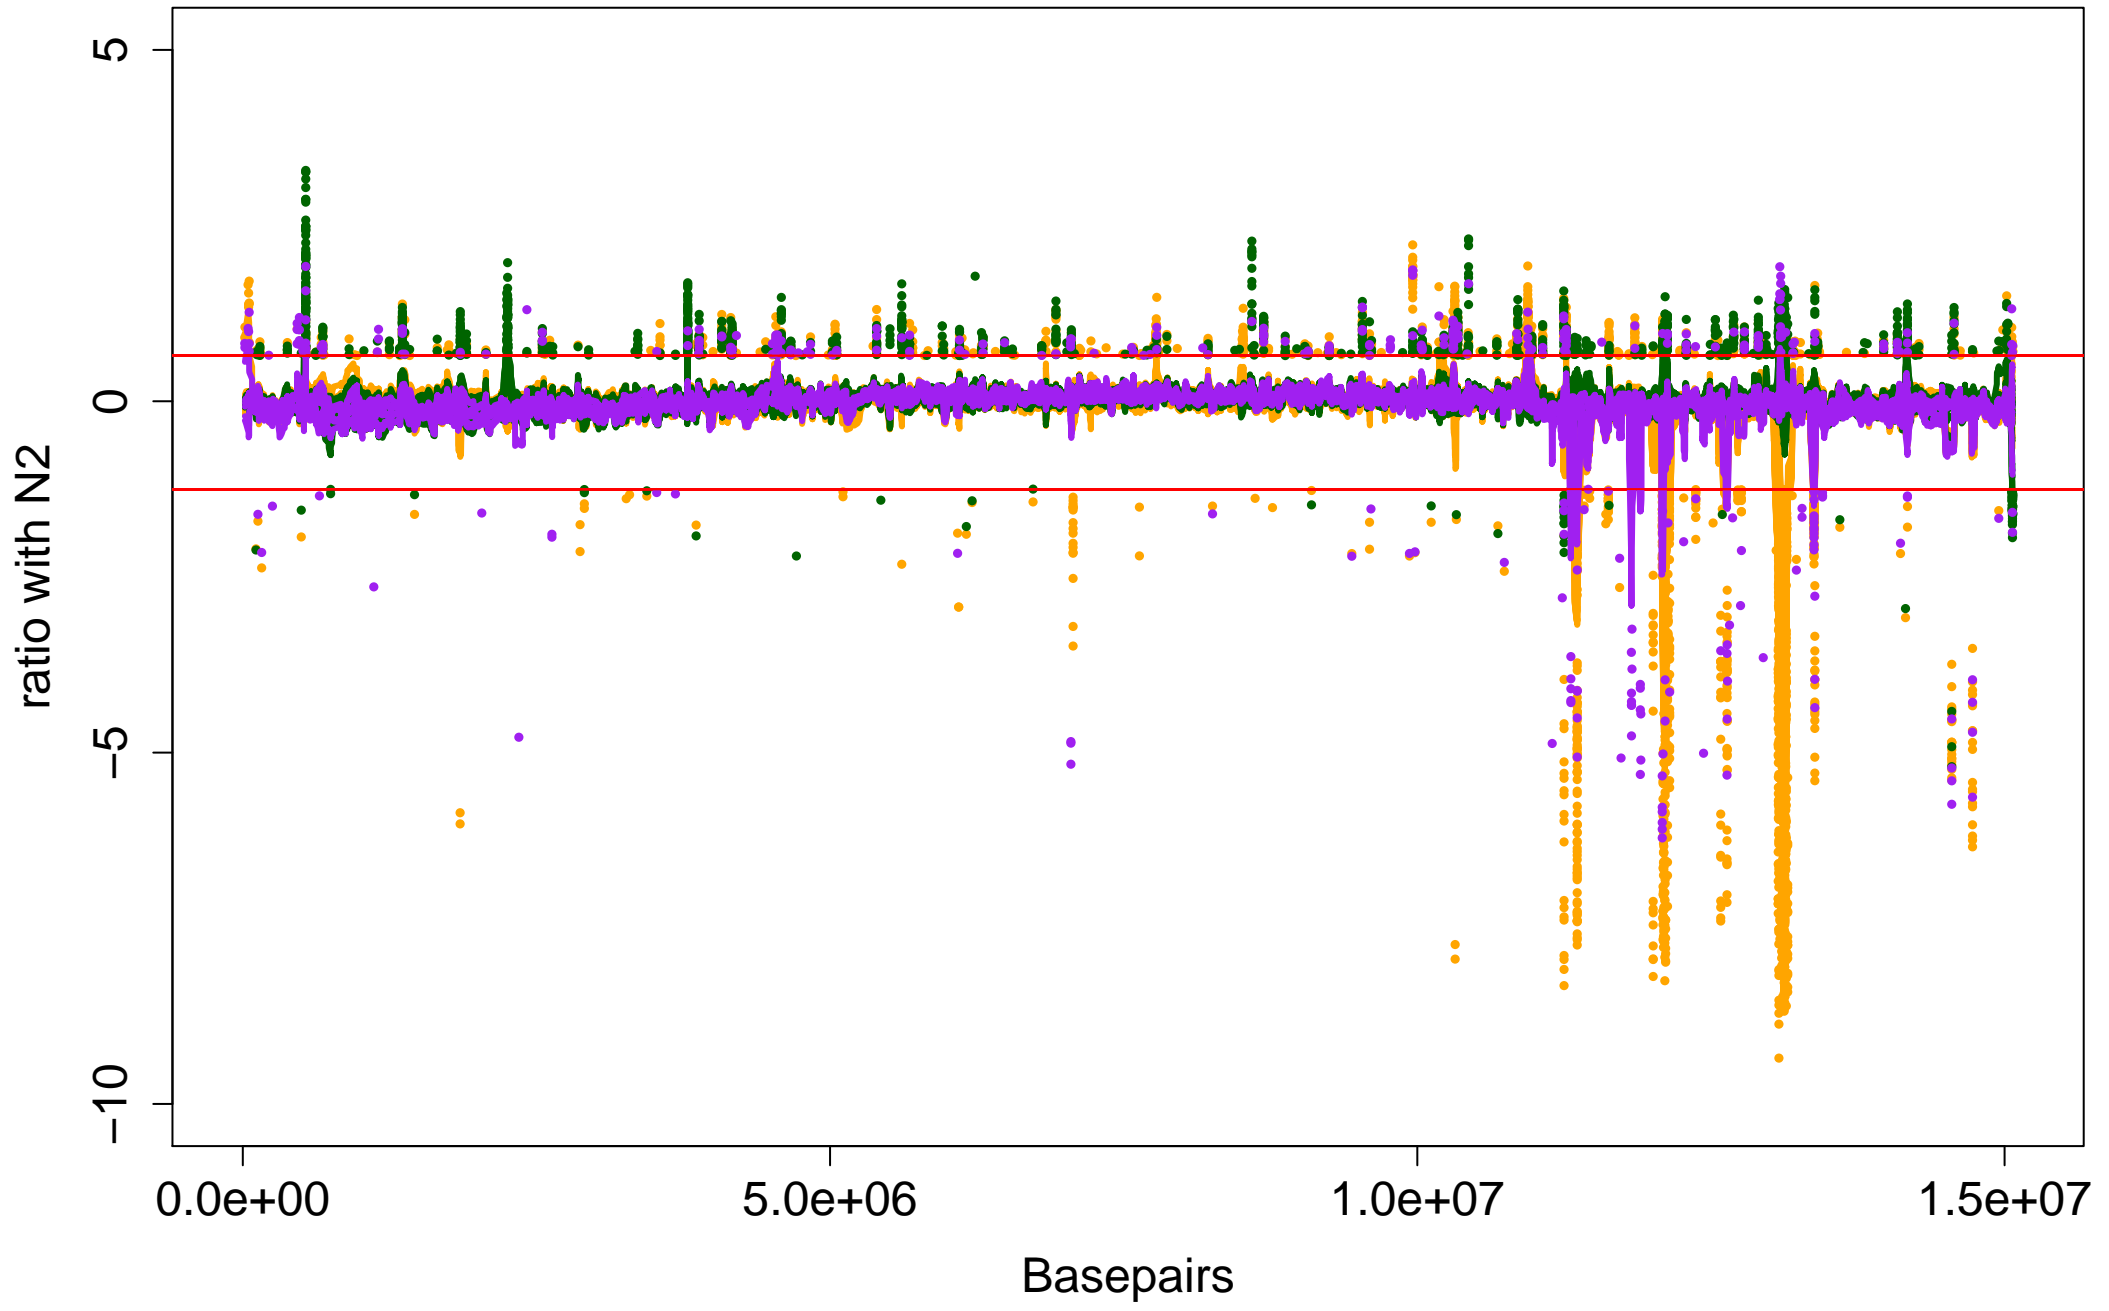

||

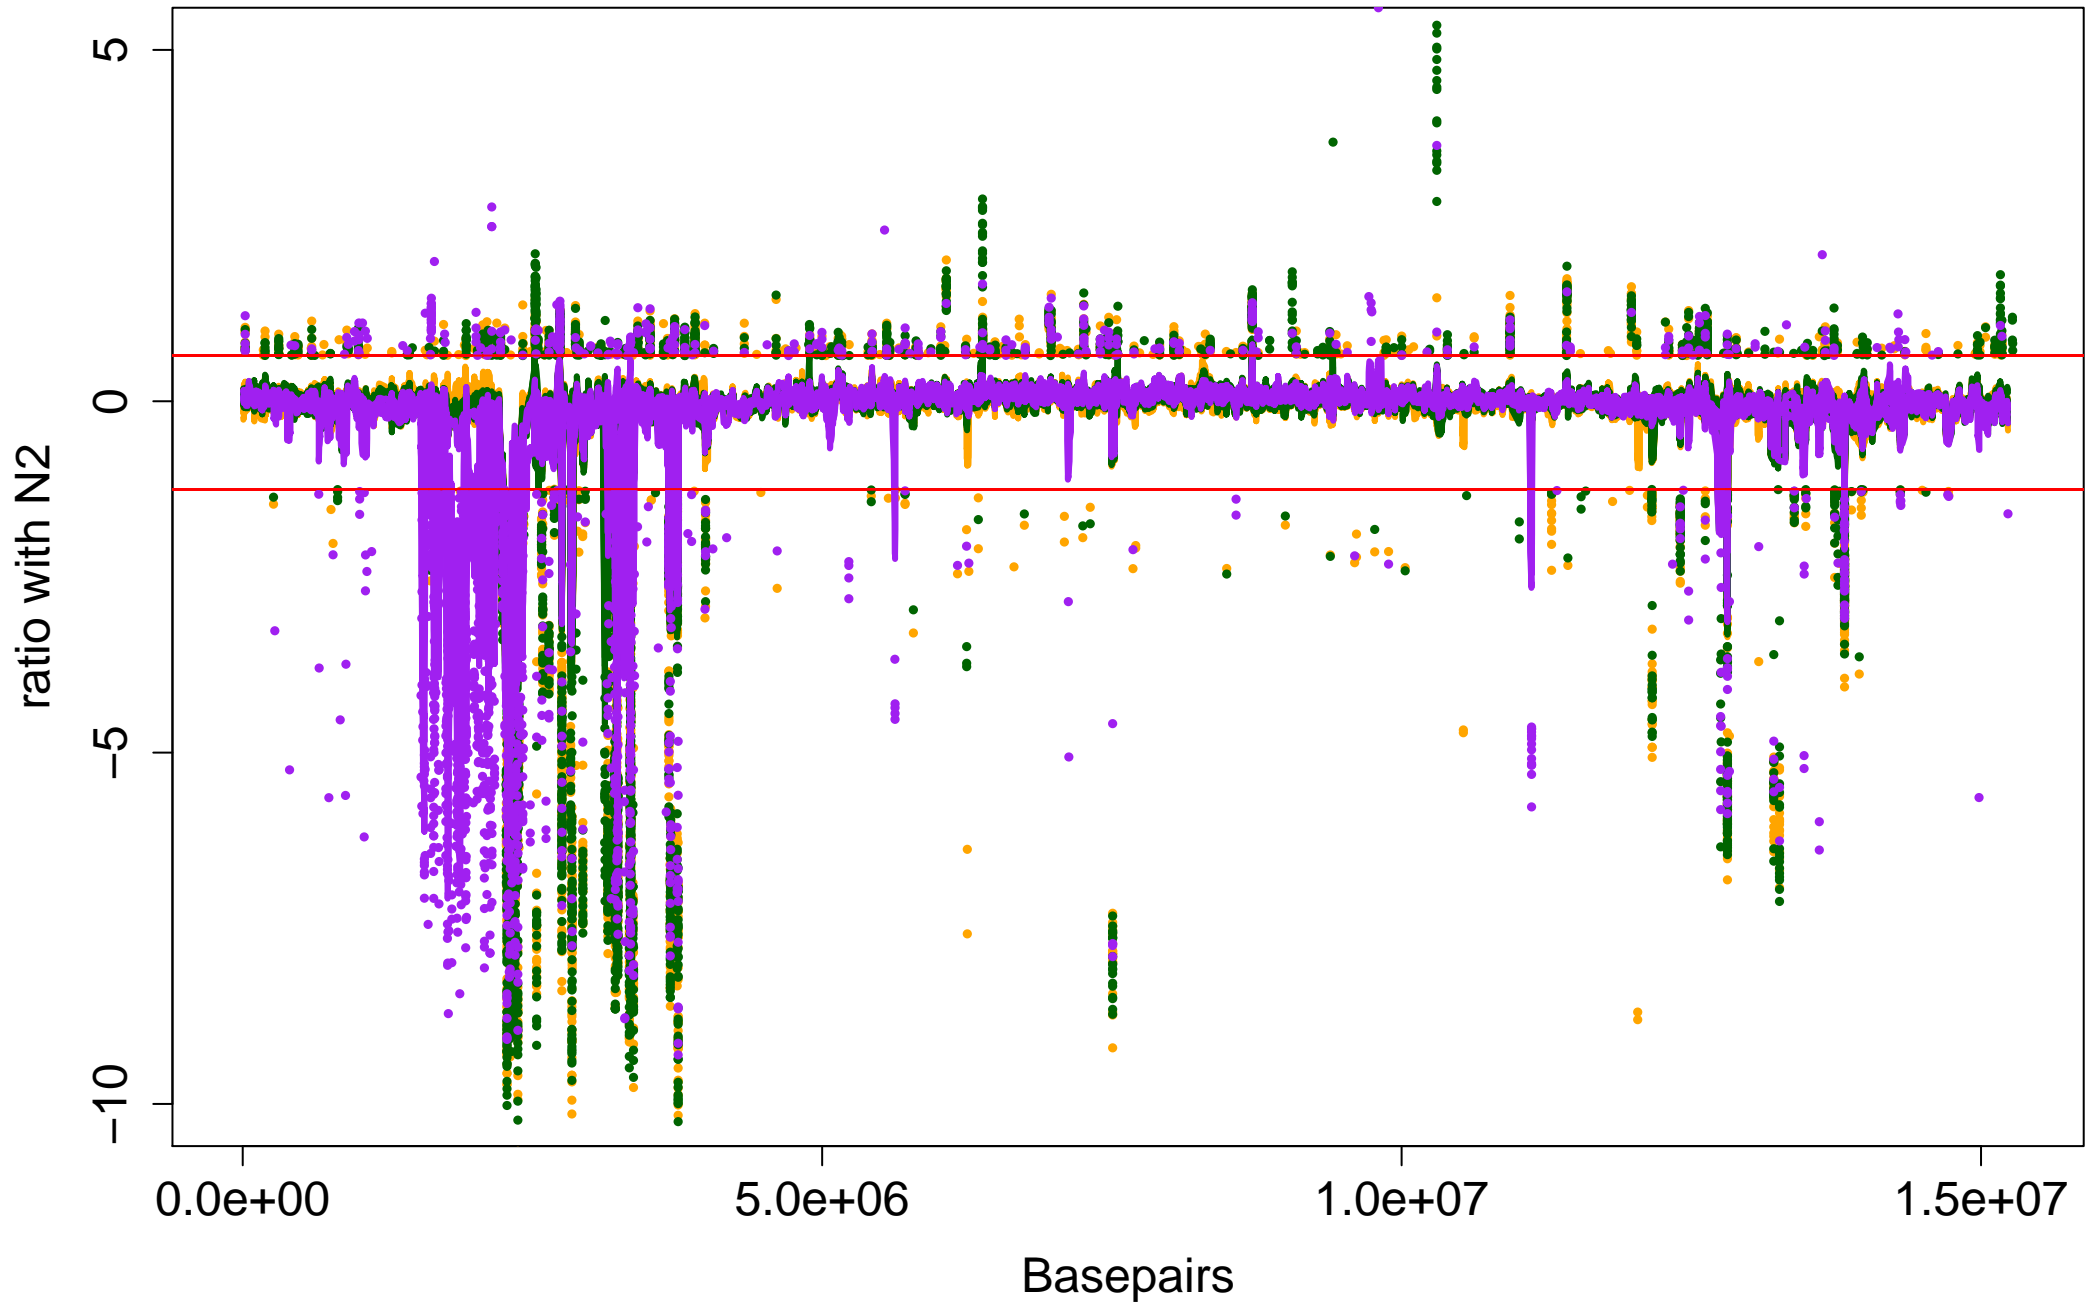

III

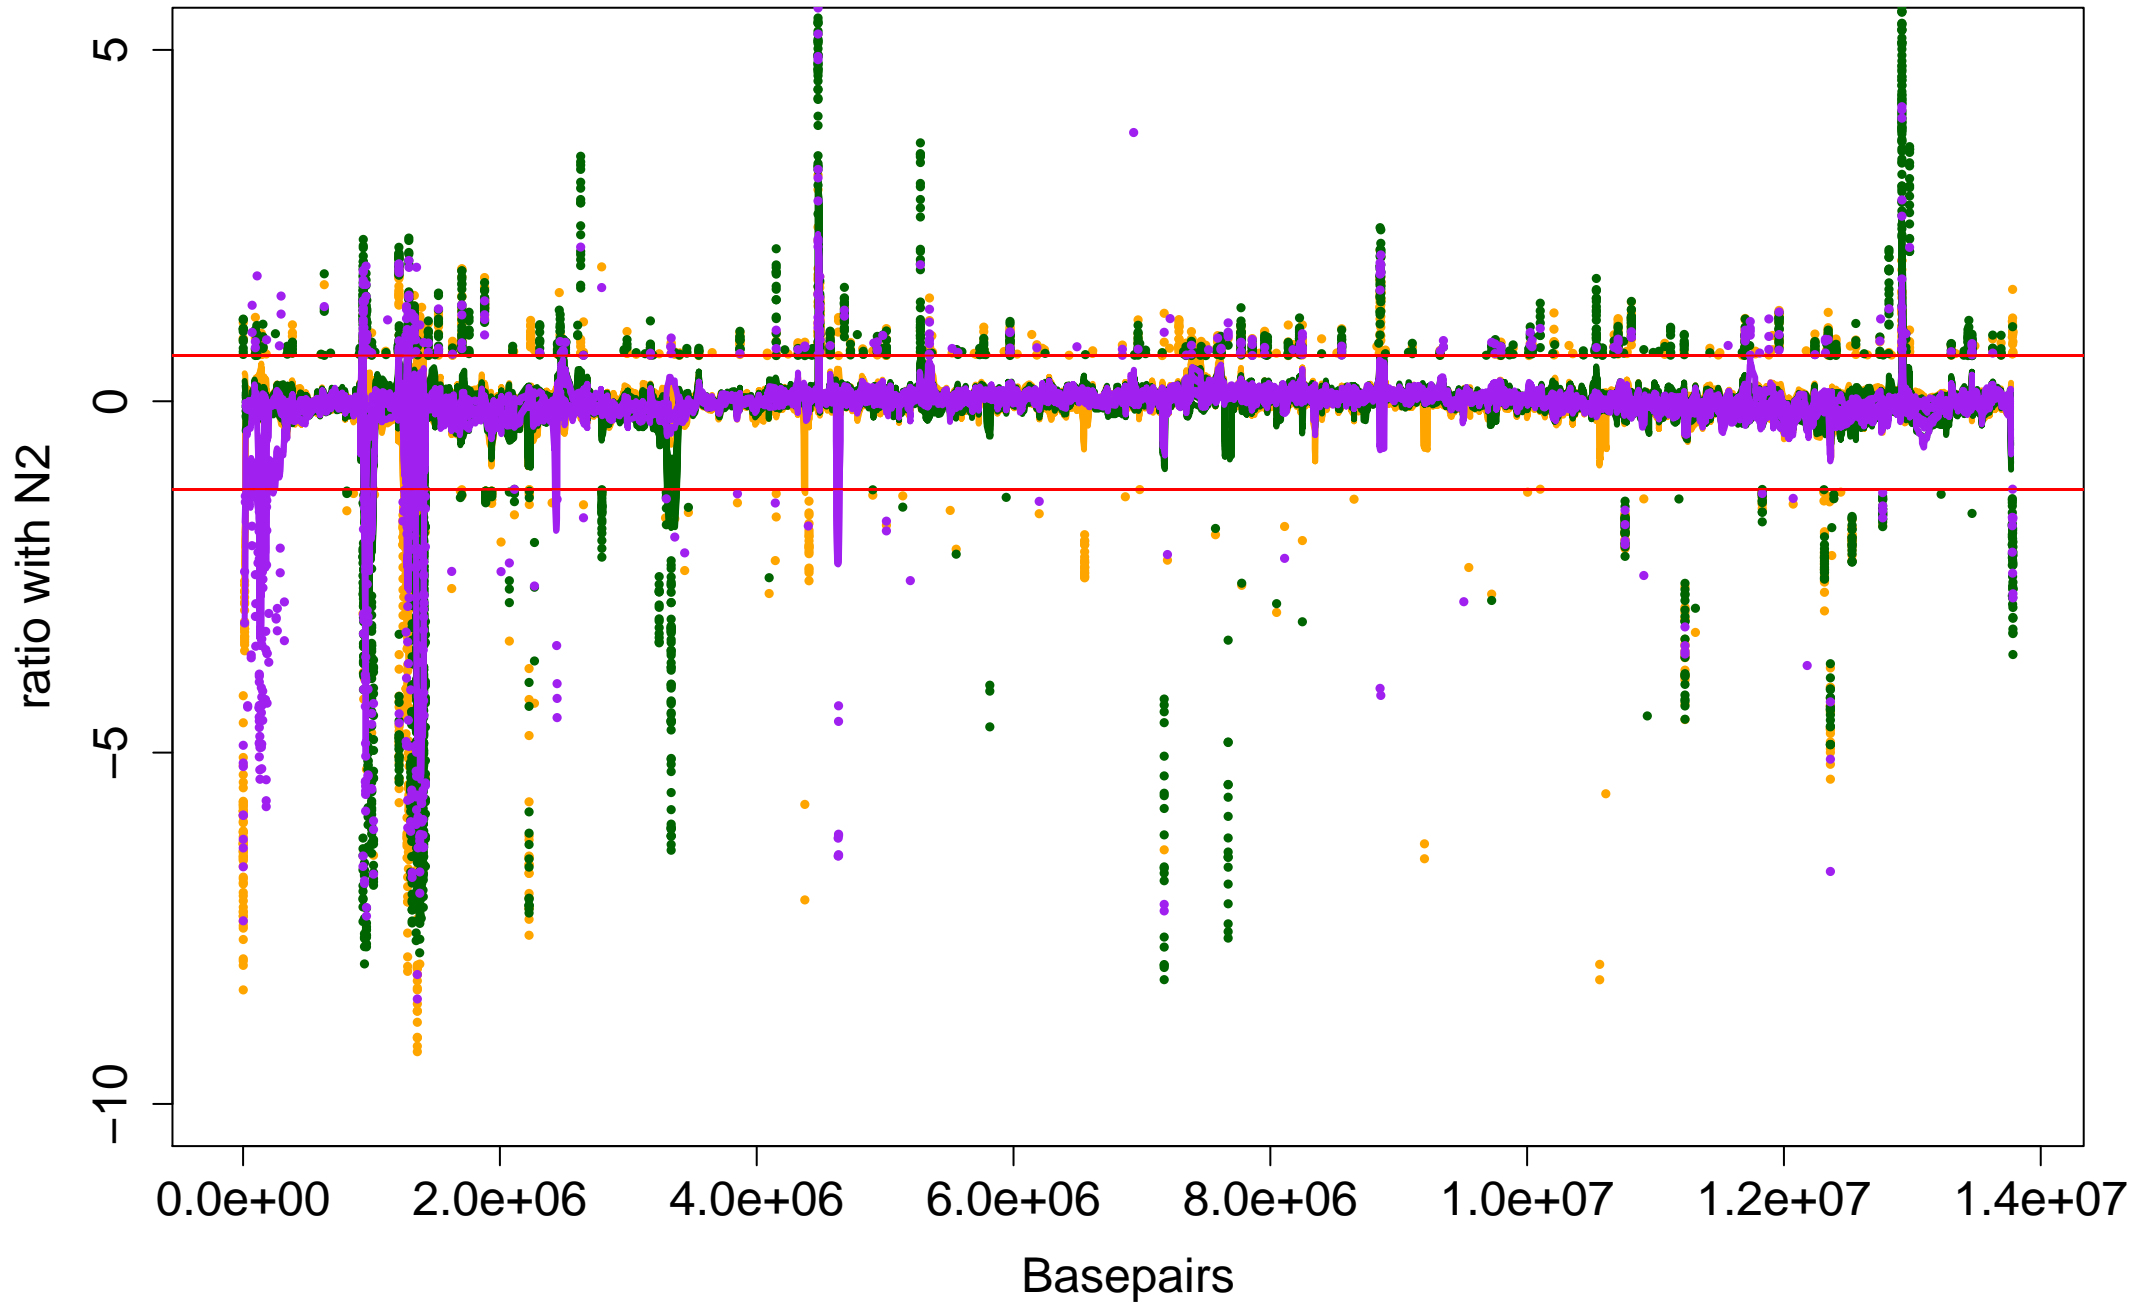

IV

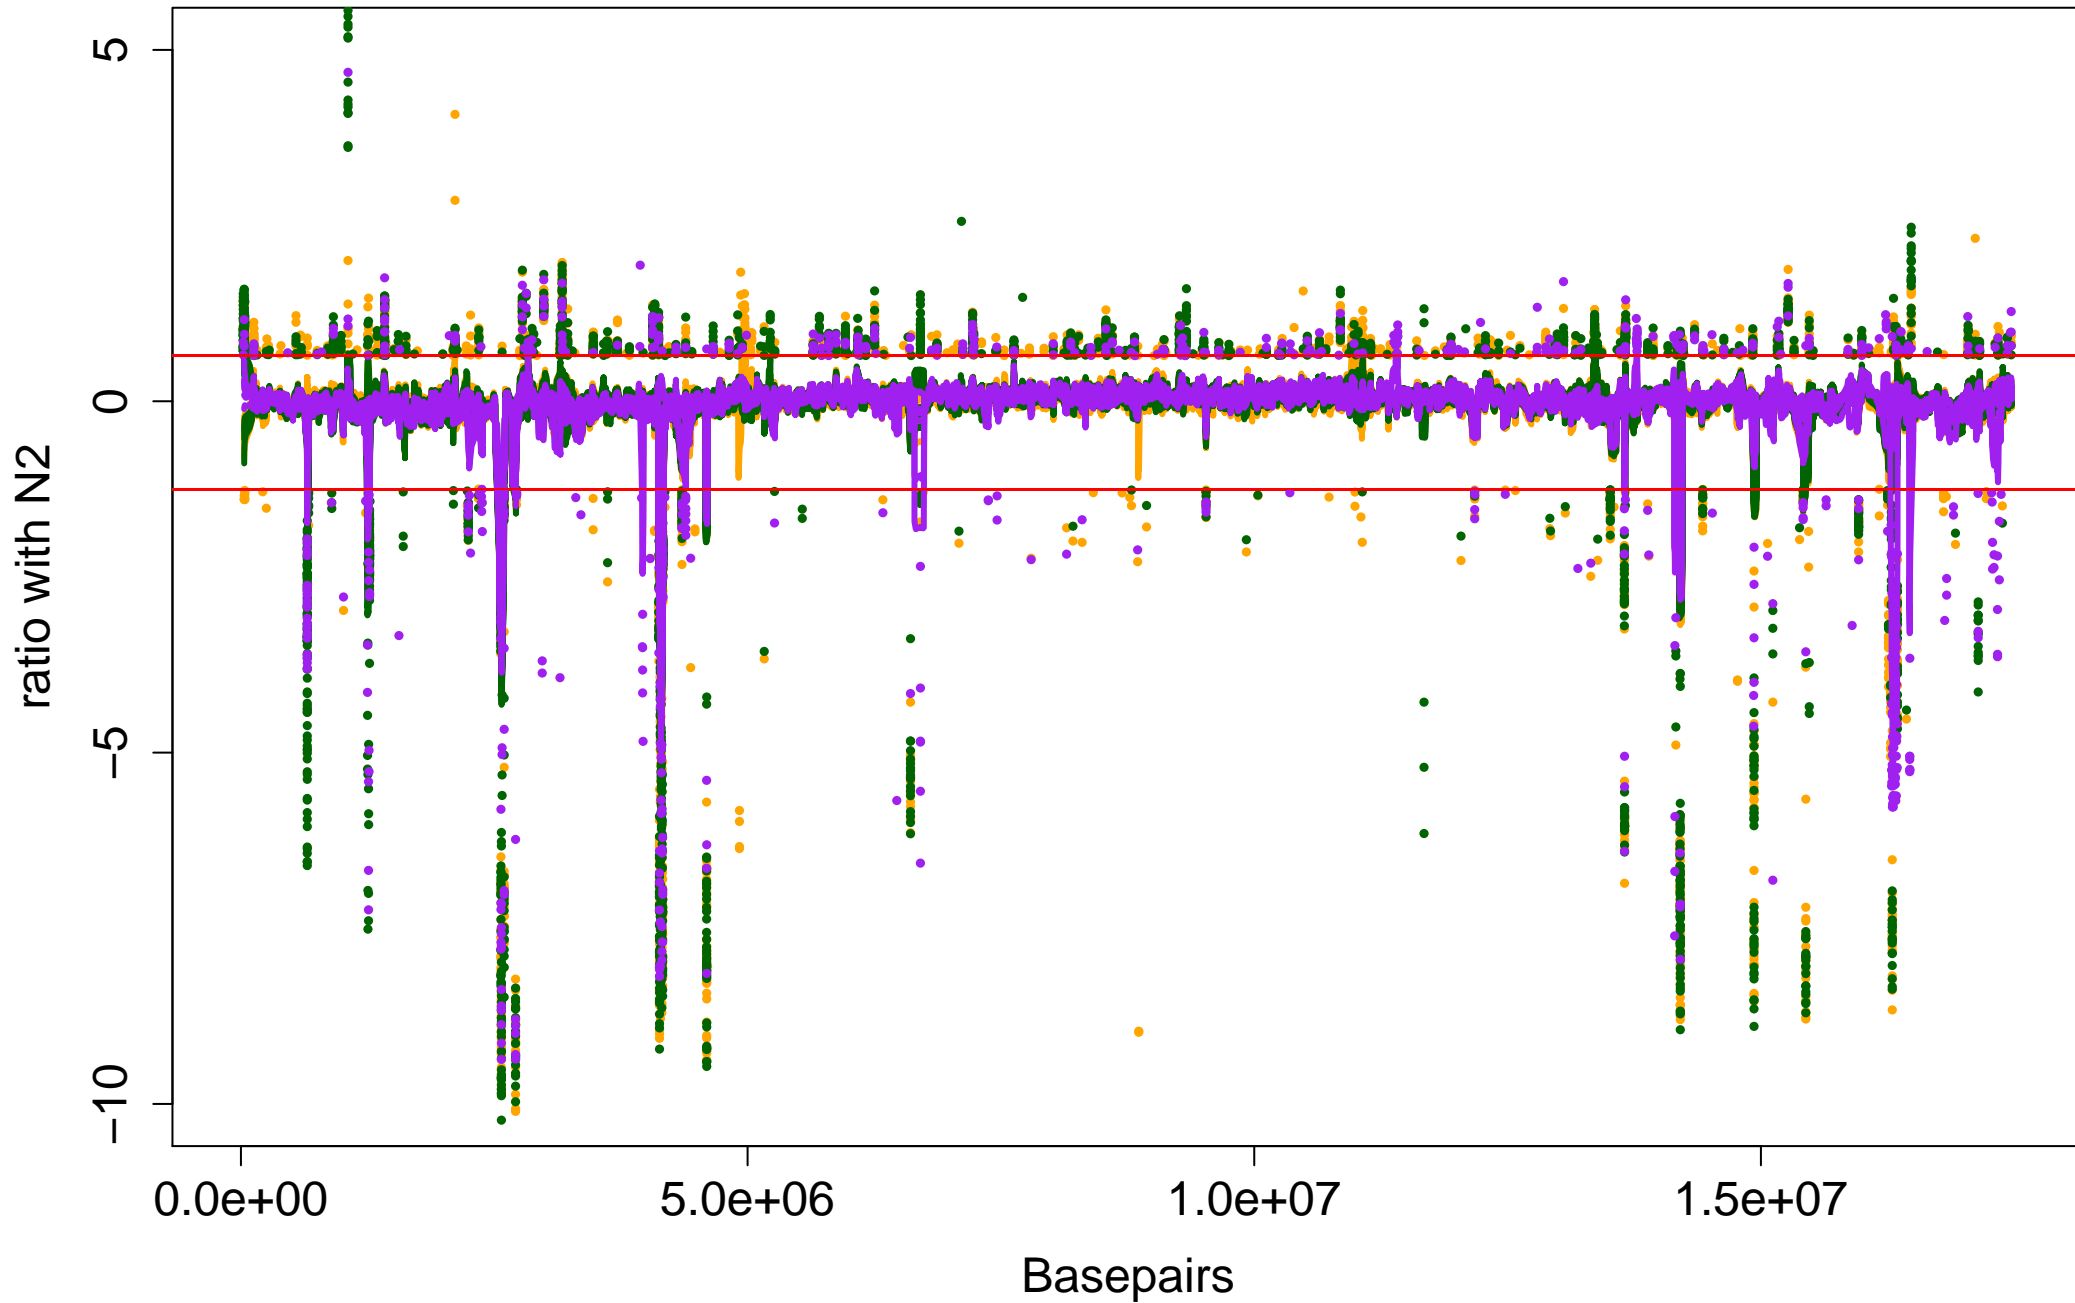

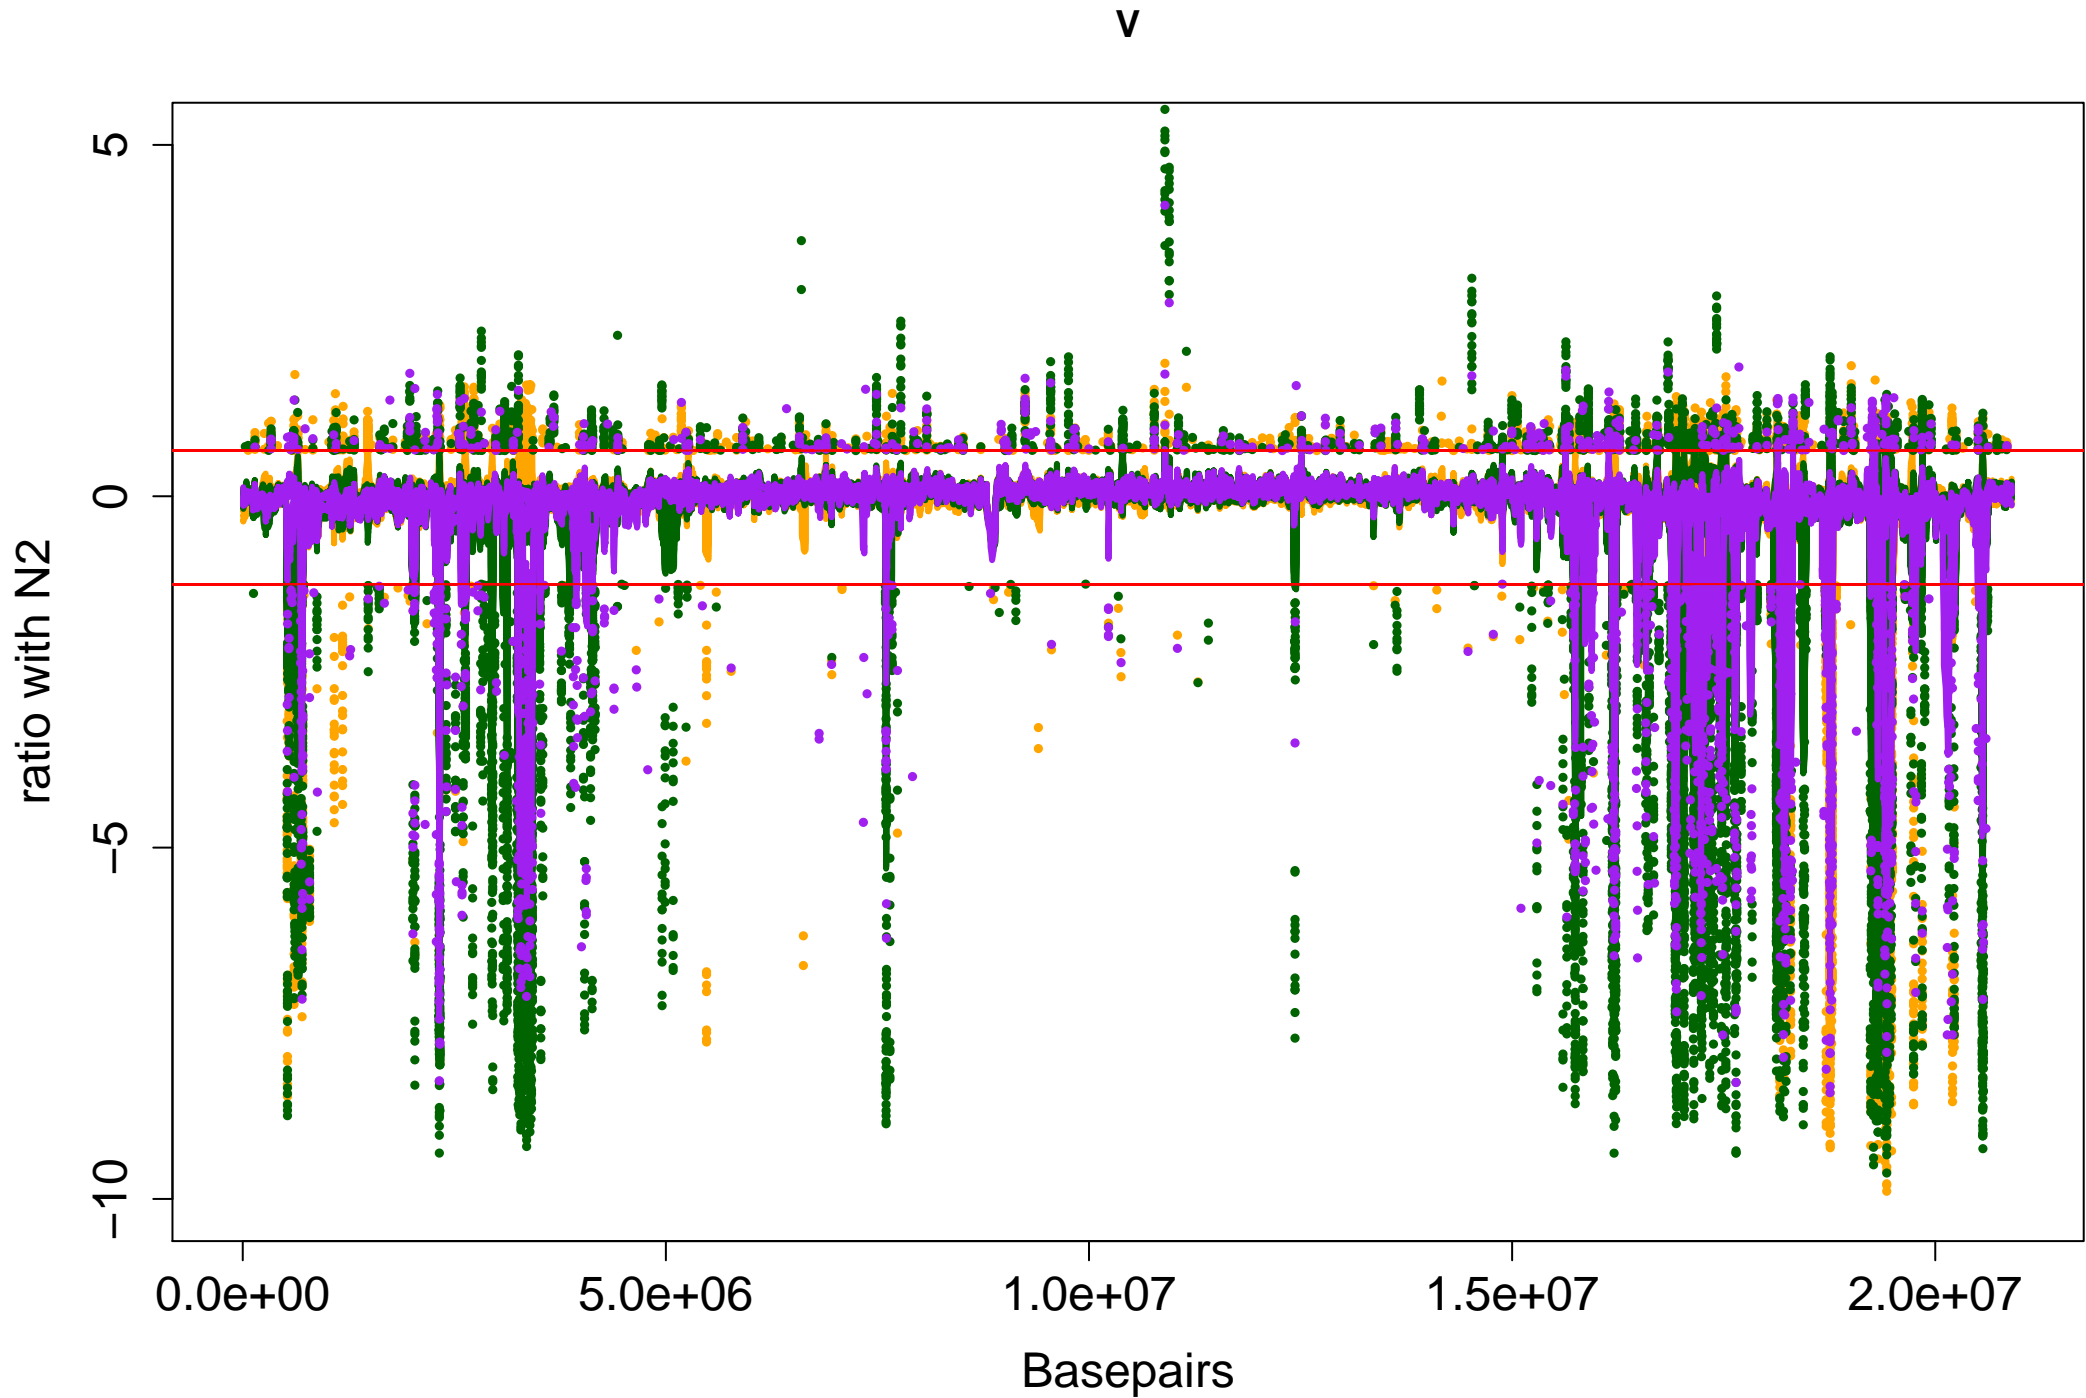

X

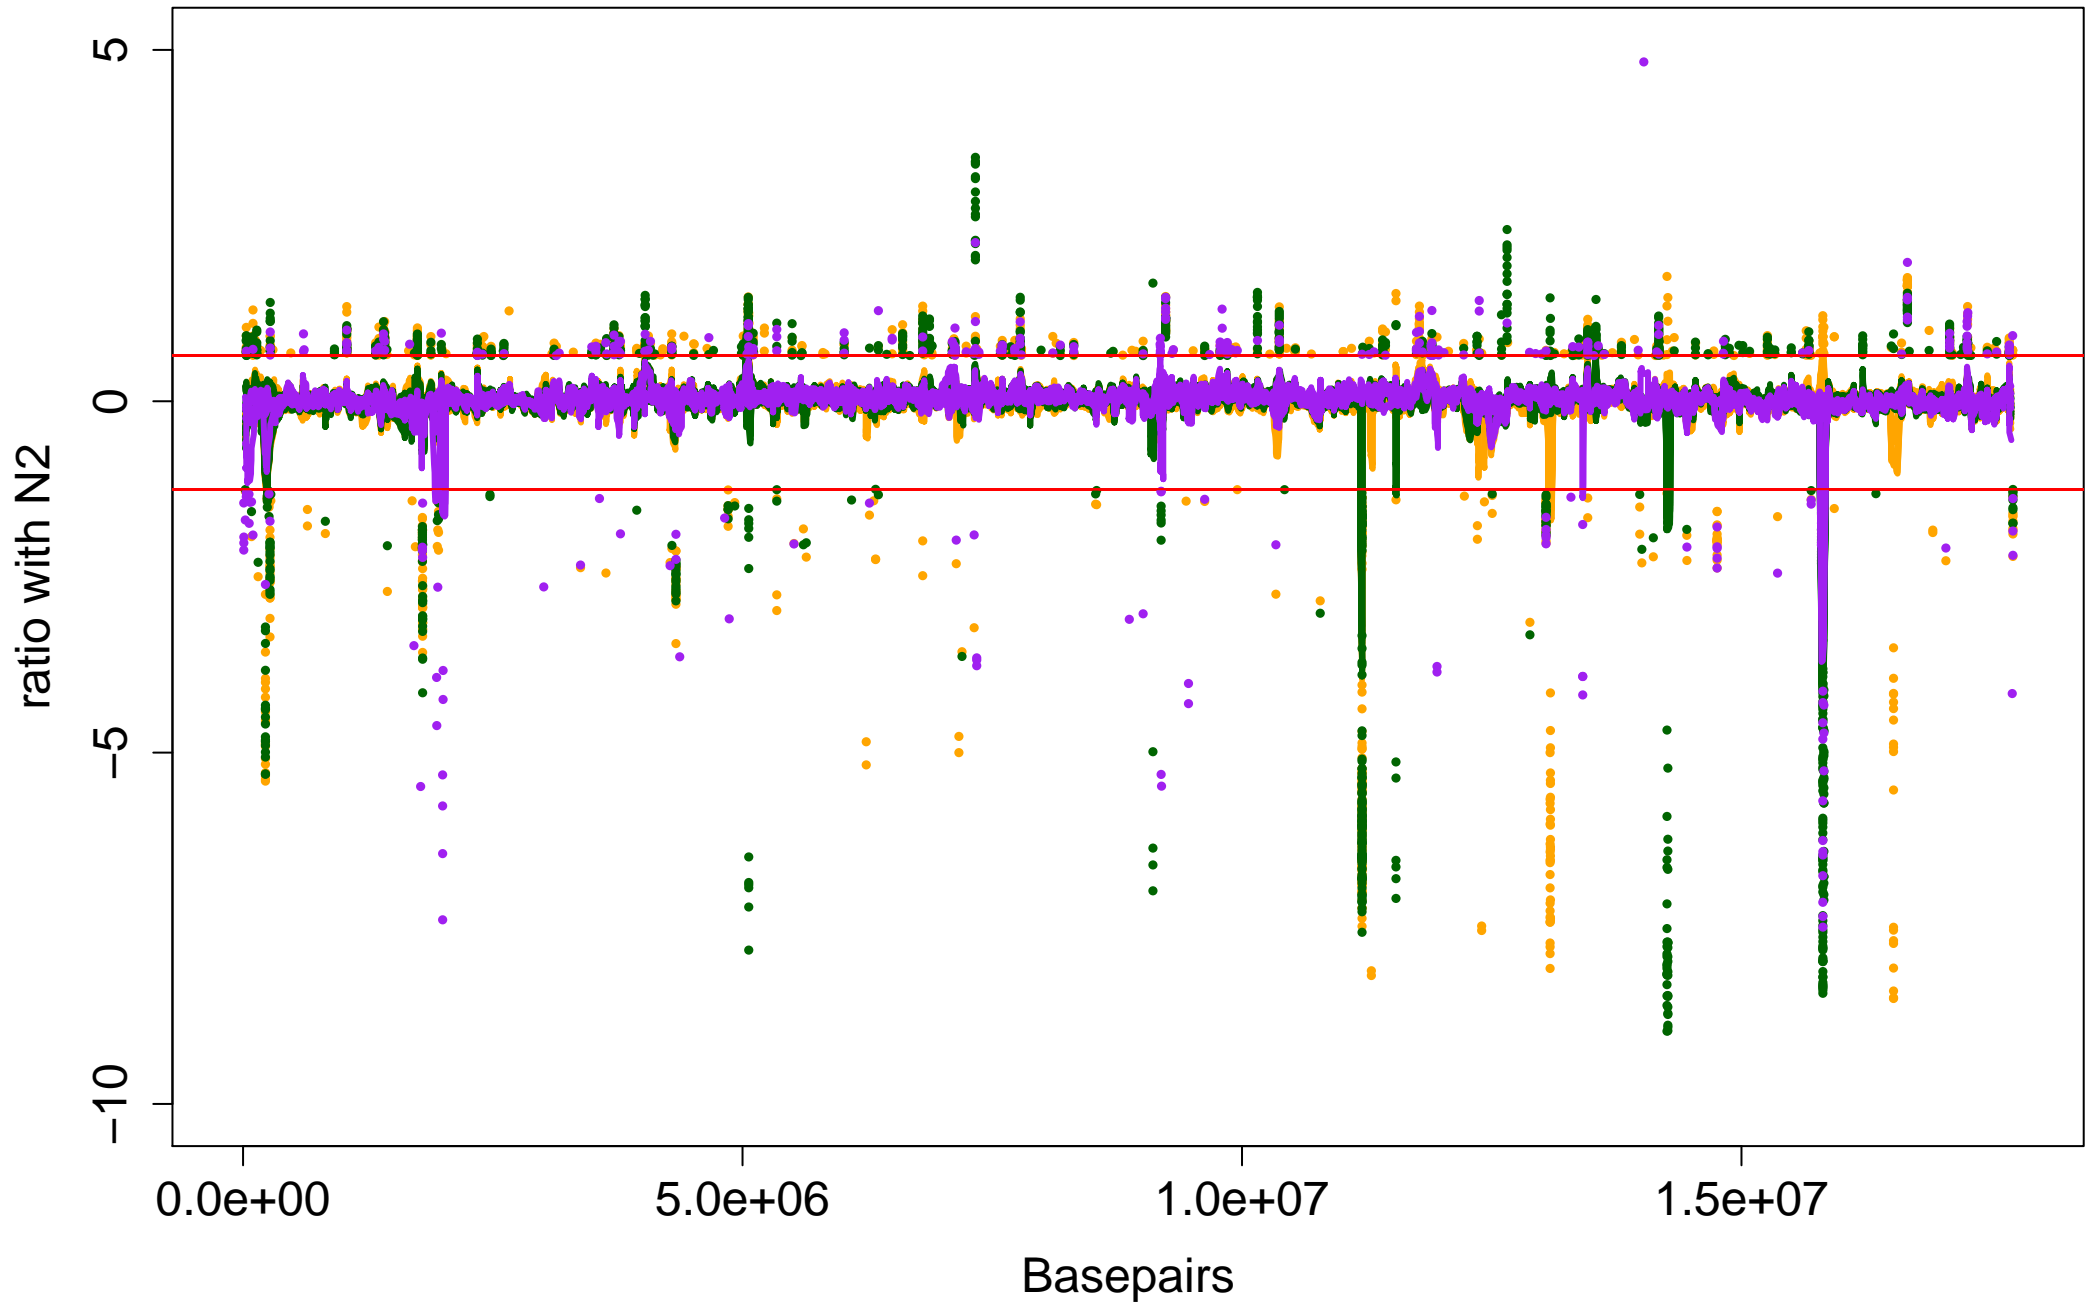

Supplement: 1741-7007-11-93-S3.pdf [file 1741-7007-11-93-S3.pdf]
