# Supplementary material for: Gene-environment and protein-degradation signatures characterize genomic and phenotypic diversity in wild Caenorhabditis elegans populations
Source: PubMed Central journal article supplement (PMC3846632; doi:10.1186/1741-7007-11-93), 2013-08-19

# A

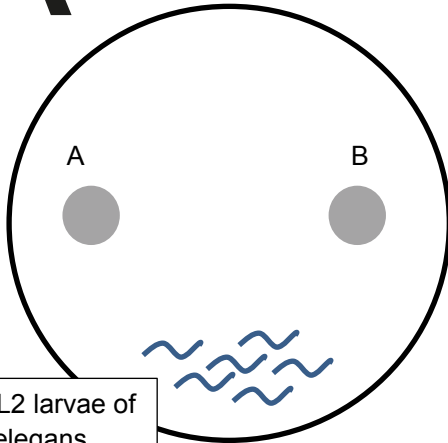

L1/L2 larvae of  
*C. elegans*

CI = (No. of worms on bacterium A - No. of worms on bacterium B) / Total no. of worms

CI = 1 = 100% preference for bacterium A

CI = 0 = No preference

CI = -1 = 100% preference for bacterium B

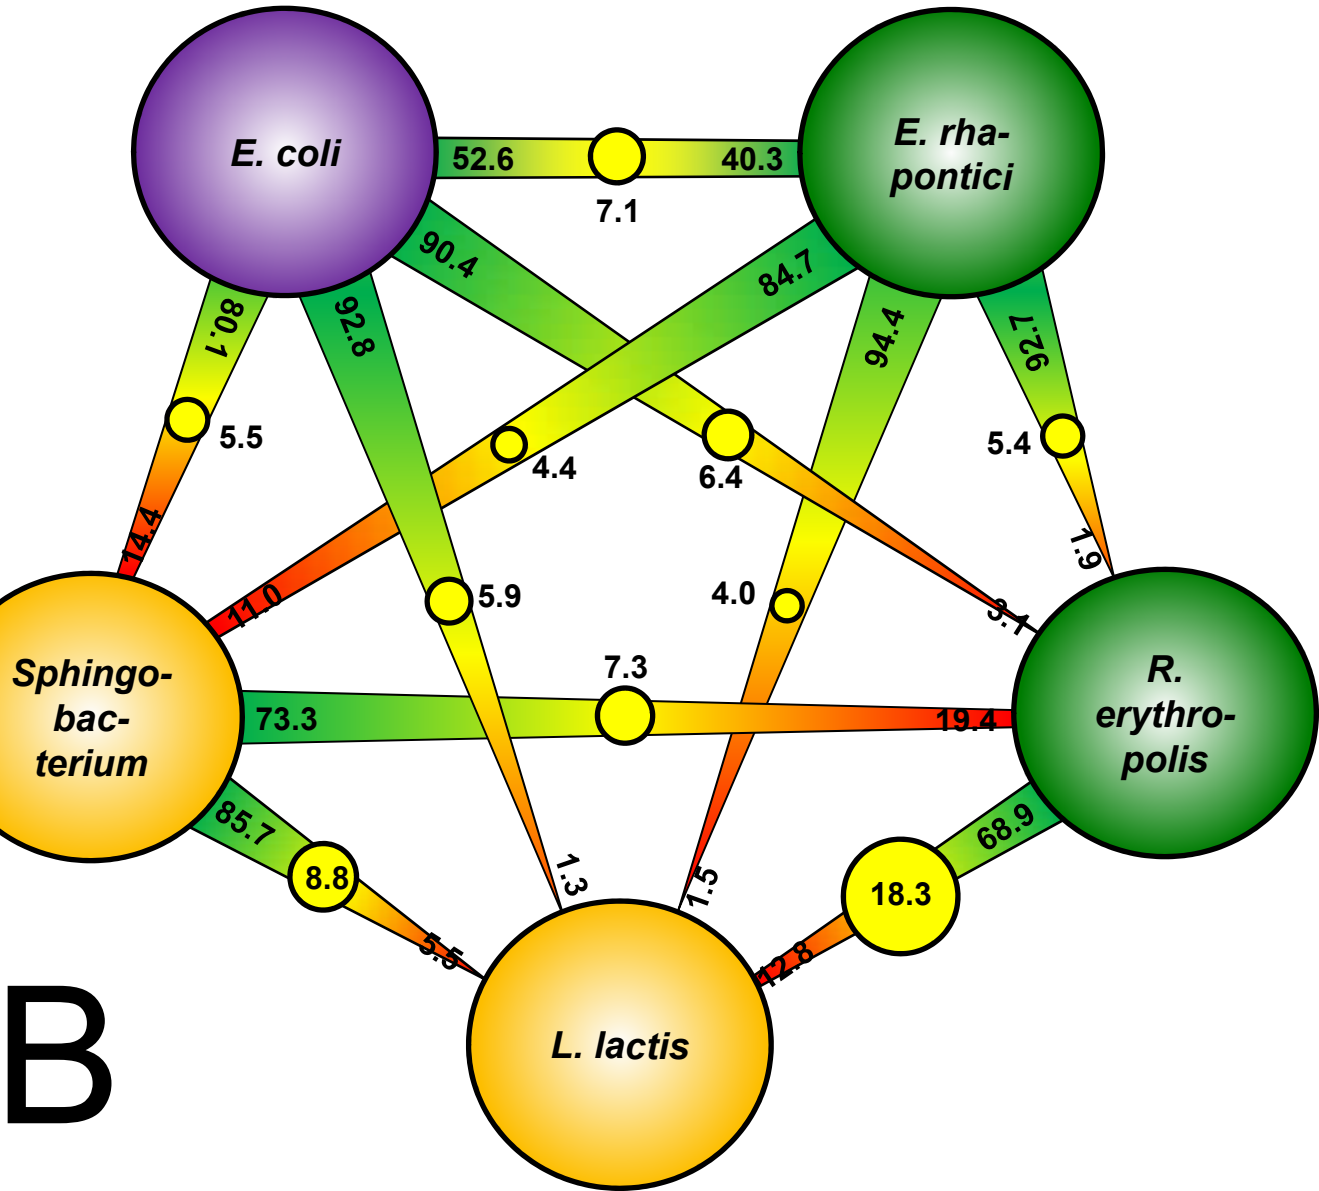

Supplement: 1741-7007-11-93-S9.pdf [file 1741-7007-11-93-S9.pdf]
